# Supplementary material
Source: Research Square preprint supplement (doi:10.21203/rs.3.rs-9447148/v1)
Supplement: Supplementary file 1 [file 0334e77f668b36726a6030f6.xlsx]

## Sheet: Sheet1
Table S3 DEGs identified between root and shoot tissues under salt conditions (Salt_Root vs. Salt_Shoot)
ID	baseMean	Salt_Shoot	Salt_Root	log2FoldChange	pvalue	padj	regulated
ChrUn.fgenesh.gene.96	4074.92	6743.05	1406.8	-2.26085	0	0	down
LOC_Os01g01120	1416.46	2714.68	118.24	-4.51767	0	0	down
LOC_Os01g01280	1333.15	2629.02	37.2838	-6.13559	0	0	down
LOC_Os01g01302	1374.58	2691.09	58.0739	-5.53322	0	0	down
LOC_Os01g01340	3304.66	6427.92	181.407	-5.1454	0	0	down
LOC_Os01g01710	4988.5	8338.9	1638.1	-2.34811	0	0	down
LOC_Os01g01790	5087.1	8681.5	1492.71	-2.54012	0	0	down
LOC_Os01g02870	1233.32	2380.14	86.4908	-4.78385	0	0	down
LOC_Os01g03020	1715.32	2929.68	500.955	-2.54847	0	0	down
LOC_Os01g03040	935.336	1802.74	67.9339	-4.7275	0	0	down
LOC_Os01g03144	1954.32	3392.91	515.734	-2.71894	0	0	down
LOC_Os01g03340	3885.7	631.489	7139.92	3.50253	0	0	up
LOC_Os01g03360	1915.93	50.5195	3781.34	6.1975	0	0	up
LOC_Os01g03914	3644.34	1491.09	5797.6	1.95677	0	0	up
LOC_Os01g04020	10114.9	14792.8	5436.92	-1.44395	0	0	down
LOC_Os01g04280	859.992	120.346	1599.64	3.72376	0	0	up
LOC_Os01g04630	3333.75	5273.44	1394.05	-1.92035	0	0	down
LOC_Os01g04650	3627.01	1745.2	5508.83	1.6595	0	0	up
LOC_Os01g04800	2260.22	3983.12	537.328	-2.89169	0	0	down
LOC_Os01g04900	1324.53	2622.17	26.8886	-6.60845	0	0	down
LOC_Os01g05060	1954.23	3496.1	412.366	-3.0832	0	0	down
LOC_Os01g05800	7499.22	14318.4	680.048	-4.39533	0	0	down
LOC_Os01g07090	1426.79	2799.58	54.005	-5.70285	0	0	down
LOC_Os01g07870	4309.04	6600.27	2017.81	-1.70928	0	0	down
LOC_Os01g08440	4404.97	8795.34	14.5905	-9.23513	0	0	down
LOC_Os01g08460	1266.02	2399.99	132.057	-4.18166	0	0	down
LOC_Os01g08510	2218.89	4246.43	191.355	-4.47482	0	0	down
LOC_Os01g08930	1804.38	3030.44	578.316	-2.39189	0	0	down
LOC_Os01g09030	1794.9	387.057	3202.75	3.05284	0	0	up
LOC_Os01g09300	7162.76	12255.7	2069.86	-2.56566	0	0	down
LOC_Os01g09430	2389.01	4019.41	758.604	-2.40514	0	0	down
LOC_Os01g09540	2398.8	4567.57	230.031	-4.31112	0	0	down
LOC_Os01g09700	1857.72	3621.51	93.9185	-5.26711	0	0	down
LOC_Os01g10210	1799.53	3286.43	312.632	-3.39531	0	0	down
LOC_Os01g10400	6658.72	13148.6	168.797	-6.27762	0	0	down
LOC_Os01g10890	711.39	1343.28	79.4976	-4.0756	0	0	down
LOC_Os01g11054	4728.17	7354.18	2102.16	-1.80669	0	0	down
LOC_Os01g11230	2009.2	3706.77	311.631	-3.57216	0	0	down
LOC_Os01g11240	2101.49	3876.48	326.499	-3.5701	0	0	down
LOC_Os01g11620	806.695	1460.31	153.078	-3.25579	0	0	down
LOC_Os01g11910	2411.49	701.799	4121.19	2.55501	0	0	up
LOC_Os01g11946	2234.75	4074.89	394.607	-3.36938	0	0	down
LOC_Os01g12080	3639.25	6655.14	623.36	-3.41571	0	0	down
LOC_Os01g12270	4063.54	7258	869.09	-3.06227	0	0	down
LOC_Os01g12710	1293.18	2237.78	348.584	-2.68369	0	0	down
LOC_Os01g12810	3507.54	6994.68	20.4033	-8.41892	0	0	down
LOC_Os01g13090	1956.47	355.26	3557.67	3.33021	0	0	up
LOC_Os01g13480	3023.29	5984.56	62.0118	-6.59548	0	0	down
LOC_Os01g13770	995.079	1858.38	131.781	-3.81331	0	0	down
LOC_Os01g15490	3986.11	6945.77	1026.45	-2.75807	0	0	down
LOC_Os01g15610	3382.57	738.458	6026.68	3.03386	0	0	up
LOC_Os01g15830	2988.14	395.381	5580.9	3.81811	0	0	up
LOC_Os01g15900	4328.14	6743.83	1912.45	-1.81864	0	0	down
LOC_Os01g15970	1415.04	111.691	2718.4	4.6124	0	0	up
LOC_Os01g16170	1700.46	3265.98	134.933	-4.59547	0	0	down
LOC_Os01g16530	1423.33	2501.26	345.395	-2.85877	0	0	down
LOC_Os01g17170	8625.23	17160	90.5056	-7.5712	0	0	down
LOC_Os01g17240	1330.81	2578.04	83.5823	-4.94464	0	0	down
LOC_Os01g17390	5902.68	9830.42	1974.93	-2.31573	0	0	down
LOC_Os01g18050	5417.6	2044.89	8790.3	2.1059	0	0	up
LOC_Os01g18080	4924.49	2218.42	7630.56	1.78041	0	0	up
LOC_Os01g18170	4689.05	65.0738	9313.02	7.16766	0	0	up
LOC_Os01g18320	1073.44	2045.06	101.832	-4.32735	0	0	down
LOC_Os01g18744	6941.6	296.99	13586.2	5.51234	0	0	up
LOC_Os01g18800	5556.6	8153.57	2959.63	-1.46208	0	0	down
LOC_Os01g19140	854.011	1625.21	82.8089	-4.29259	0	0	down
LOC_Os01g19150	5938.07	9054.58	2821.56	-1.6818	0	0	down
LOC_Os01g20110	1451.27	2787.81	114.729	-4.60242	0	0	down
LOC_Os01g20830	2014.52	3923.72	105.314	-5.21546	0	0	down
LOC_Os01g21250	4062.92	6758.26	1367.59	-2.30477	0	0	down
LOC_Os01g21820	5225.57	10036.8	414.317	-4.59869	0	0	down
LOC_Os01g22900	8530.47	14765	2295.92	-2.68496	0	0	down
LOC_Os01g22980	2433.27	4831.55	34.9926	-7.10761	0	0	down
LOC_Os01g23680	1626.11	2789.62	462.598	-2.5923	0	0	down
LOC_Os01g24710	15551.7	7058.94	24044.4	1.76877	0	0	up
LOC_Os01g24764	781.924	1502.86	60.9862	-4.62404	0	0	down
LOC_Os01g25386	7095.98	11685.9	2506.06	-2.22149	0	0	down
LOC_Os01g25484	6215.92	9757.89	2673.96	-1.86729	0	0	down
LOC_Os01g25560	2192.31	207.708	4176.91	4.34563	0	0	up
LOC_Os01g25600	935.473	1832.9	38.0465	-5.59263	0	0	down
LOC_Os01g25990	1890.05	3687.23	92.8766	-5.31239	0	0	down
LOC_Os01g26039	1484.54	2763.34	205.751	-3.74559	0	0	down
LOC_Os01g28989	4401.62	7502.67	1300.57	-2.52838	0	0	down
LOC_Os01g29409	2000.03	3340.5	659.562	-2.34048	0	0	down
LOC_Os01g29830	1893.15	3510.72	275.576	-3.67218	0	0	down
LOC_Os01g31110	2998.68	5195	802.362	-2.69417	0	0	down
LOC_Os01g31680	1167.36	2073.04	261.679	-2.98493	0	0	down
LOC_Os01g31690	26127.9	52242.8	12.9436	-11.9898	0	0	down
LOC_Os01g32730	958.177	1878.2	38.1502	-5.61925	0	0	down
LOC_Os01g34060	1916.35	3692.69	140.012	-4.72388	0	0	down
LOC_Os01g35789	4379	7203.12	1554.87	-2.21055	0	0	down
LOC_Os01g36240	960.687	57.058	1864.32	5.04338	0	0	up
LOC_Os01g37000	2783.01	99.1266	5466.9	5.7738	0	0	up
LOC_Os01g37050	1770.73	3164.27	377.195	-3.06825	0	0	down
LOC_Os01g37130	1727.88	3334.25	121.512	-4.7757	0	0	down
LOC_Os01g37690	3258.43	5331.45	1185.42	-2.1693	0	0	down
LOC_Os01g37870	1503.93	2692.26	315.606	-3.09154	0	0	down
LOC_Os01g38610	2234.26	4444.87	23.6515	-7.55446	0	0	down
LOC_Os01g40310	1361.73	2692.71	30.7551	-6.45709	0	0	down
LOC_Os01g40630	2717.36	4338.41	1096.32	-1.98348	0	0	down
LOC_Os01g40640	2137.02	3665.73	608.305	-2.59093	0	0	down
LOC_Os01g40710	1529.74	3003.21	56.2733	-5.73646	0	0	down
LOC_Os01g40870	4558.01	791.519	8324.5	3.39805	0	0	up
LOC_Os01g41810	960.123	1846.12	74.1266	-4.64291	0	0	down
LOC_Os01g42280	908.91	1751.9	65.9205	-4.73222	0	0	down
LOC_Os01g42410	1793.26	467.746	3118.76	2.73531	0	0	up
LOC_Os01g42880	2289.35	966.241	3612.46	1.90155	0	0	up
LOC_Os01g43070	1266.49	2354.14	178.827	-3.71838	0	0	down
LOC_Os01g43120	4227.15	8262.97	191.33	-5.43147	0	0	down
LOC_Os01g43150	8008.87	14836.4	1181.35	-3.65104	0	0	down
LOC_Os01g44210	3490.15	6778.39	201.92	-5.069	0	0	down
LOC_Os01g45274	39341.5	72943.9	5739.02	-3.6679	0	0	down
LOC_Os01g45470	2377.47	4706.17	48.7625	-6.58546	0	0	down
LOC_Os01g45640	1220.58	2144.2	296.971	-2.85542	0	0	down
LOC_Os01g45750	3923.19	6588.45	1257.93	-2.38949	0	0	down
LOC_Os01g45914	77197.7	153254	1141.85	-7.06859	0	0	down
LOC_Os01g45990	1410.61	287.295	2533.92	3.14246	0	0	up
LOC_Os01g46380	11871	5839.05	17902.9	1.61607	0	0	up
LOC_Os01g46610	10668.8	5221.84	16115.8	1.62648	0	0	up
LOC_Os01g46720	33620.3	57799.9	9440.58	-2.61395	0	0	down
LOC_Os01g47330	2296.4	4491.53	101.278	-5.46993	0	0	down
LOC_Os01g47350	1437.2	2780.71	93.6929	-4.89466	0	0	down
LOC_Os01g47450	1283.07	2184.21	381.93	-2.51558	0	0	down
LOC_Os01g48300	1107.8	1964.35	251.242	-2.96952	0	0	down
LOC_Os01g48380	2289.67	4203.9	375.449	-3.48344	0	0	down
LOC_Os01g48690	4274.61	8403.63	145.585	-5.8479	0	0	down
LOC_Os01g48990	4183	7584.46	781.541	-3.27798	0	0	down
LOC_Os01g49470	9605.74	15584.8	3626.67	-2.1033	0	0	down
LOC_Os01g49740	1357.22	2693.79	20.6513	-7.024	0	0	down
LOC_Os01g50160	2783.99	825.25	4742.74	2.52283	0	0	up
LOC_Os01g50460	3689.81	7160.07	219.549	-5.02651	0	0	down
LOC_Os01g50622	830.933	1574.51	87.3536	-4.16855	0	0	down
LOC_Os01g50760	1357.05	2401.27	312.827	-2.94091	0	0	down
LOC_Os01g50930	1215.31	2248.54	182.079	-3.6279	0	0	down
LOC_Os01g51360	3101.26	6116.99	85.522	-6.15612	0	0	down
LOC_Os01g51410	33136.2	57172.8	9099.57	-2.65151	0	0	down
LOC_Os01g51530	798.611	1525.31	71.9085	-4.40326	0	0	down
LOC_Os01g52110	7793.31	12541.2	3045.36	-2.0415	0	0	down
LOC_Os01g52170	1746.01	3449.62	42.3929	-6.34845	0	0	down
LOC_Os01g52640	7623.23	13916.7	1329.76	-3.38734	0	0	down
LOC_Os01g53060	1279.89	2217.63	342.147	-2.69531	0	0	down
LOC_Os01g53090	2579.03	5065.47	92.6002	-5.77149	0	0	down
LOC_Os01g53150	1499.32	2468.28	530.354	-2.21836	0	0	down
LOC_Os01g53800	1460.14	340.842	2579.44	2.91336	0	0	up
LOC_Os01g54540	3972.75	7773.14	172.374	-5.49785	0	0	down
LOC_Os01g55290	1076.25	1895.61	256.883	-2.88199	0	0	down
LOC_Os01g55570	1346.41	2656.79	36.0382	-6.20828	0	0	down
LOC_Os01g55670	1497.26	2930.22	64.2963	-5.51156	0	0	down
LOC_Os01g55830	15470.4	5463.02	25477.7	2.22058	0	0	up
LOC_Os01g56780	6850.69	11608.3	2093.05	-2.47152	0	0	down
LOC_Os01g57073	3673.92	1540.95	5806.88	1.91307	0	0	up
LOC_Os01g57770	1761.95	318.575	3205.33	3.33826	0	0	up
LOC_Os01g58240	2884.53	442.547	5326.51	3.59125	0	0	up
LOC_Os01g58470	1205.22	2366.5	43.9403	-5.74684	0	0	down
LOC_Os01g58910	2280.38	253.408	4307.36	4.09592	0	0	up
LOC_Os01g59060	1858.4	3673.09	43.7166	-6.39074	0	0	down
LOC_Os01g59080	3402.82	6775.84	29.7931	-7.83036	0	0	down
LOC_Os01g59090	1293.45	2554.99	31.9048	-6.32666	0	0	down
LOC_Os01g59530	1100.16	2078.74	121.594	-4.09722	0	0	down
LOC_Os01g60190	8422.12	4556.4	12287.8	1.43099	0	0	up
LOC_Os01g60280	2415.44	459.683	4371.2	3.25351	0	0	up
LOC_Os01g60930	950.936	134.446	1767.43	3.72663	0	0	up
LOC_Os01g61120	2853.91	5224.07	483.74	-3.43373	0	0	down
LOC_Os01g61160	909.636	75.064	1744.21	4.54661	0	0	up
LOC_Os01g62440	2401.62	4303.69	499.552	-3.10582	0	0	down
LOC_Os01g62840	4383.94	7096.58	1671.3	-2.08558	0	0	down
LOC_Os01g63190	1721.21	2851.99	590.429	-2.27177	0	0	down
LOC_Os01g63210	2309.36	4433.11	185.61	-4.57803	0	0	down
LOC_Os01g63270	3000.49	5079.85	921.13	-2.46343	0	0	down
LOC_Os01g63580	1967.19	332.086	3602.3	3.44438	0	0	up
LOC_Os01g63990	842.758	1634.95	50.5628	-5.0165	0	0	down
LOC_Os01g64520	4141.88	814.963	7468.8	3.19758	0	0	up
LOC_Os01g64660	12906.4	25794.9	17.79	-10.5004	0	0	down
LOC_Os01g64700	4326.14	1579.25	7073.03	2.1636	0	0	up
LOC_Os01g64930	1881.39	3159.86	602.918	-2.3895	0	0	down
LOC_Os01g64960	9344.9	18583.4	106.408	-7.4464	0	0	down
LOC_Os01g65080	18039.3	27005.5	9073.15	-1.57358	0	0	down
LOC_Os01g65100	13800.9	20678.9	6922.91	-1.5786	0	0	down
LOC_Os01g65260	2513.08	4970.45	55.7059	-6.4776	0	0	down
LOC_Os01g65400	872.536	1599.11	145.96	-3.45028	0	0	down
LOC_Os01g65880	1444.95	2575.76	314.137	-3.03288	0	0	down
LOC_Os01g66170	1211.47	2097.49	325.444	-2.68845	0	0	down
LOC_Os01g66600	1096.38	2102.01	90.7472	-4.53369	0	0	down
LOC_Os01g66850	1319.48	2621	17.957	-7.20053	0	0	down
LOC_Os01g67000	3797.35	6938.76	655.936	-3.40476	0	0	down
LOC_Os01g67120	4322.58	8604.74	40.4189	-7.71884	0	0	down
LOC_Os01g67490	694.823	1327.21	62.4323	-4.41398	0	0	down
LOC_Os01g67570	1443.97	2591.87	296.077	-3.13112	0	0	down
LOC_Os01g67720	2578.96	4686.42	471.508	-3.31393	0	0	down
LOC_Os01g68300	4698.79	9144.92	252.663	-5.17937	0	0	down
LOC_Os01g68330	2452.01	4248.49	655.544	-2.69515	0	0	down
LOC_Os01g68589	1335.91	152.839	2518.99	4.02785	0	0	up
LOC_Os01g68770	7171.7	10684	3659.36	-1.54533	0	0	down
LOC_Os01g68860	4229.05	7544.52	913.58	-3.04549	0	0	down
LOC_Os01g69030	2472.08	4821.27	122.889	-5.294	0	0	down
LOC_Os01g69060	1946.01	3770.51	121.52	-4.9562	0	0	down
LOC_Os01g69070	772.315	1466.94	77.6861	-4.23862	0	0	down
LOC_Os01g69080	5185.79	10072.7	298.849	-5.07556	0	0	down
LOC_Os01g69120	2995.3	5820.12	170.479	-5.09129	0	0	down
LOC_Os01g69950	3968.32	7799.64	137.009	-5.83257	0	0	down
LOC_Os01g70400	3382.79	6754.3	11.2726	-9.21352	0	0	down
LOC_Os01g70740	1791.1	2970.98	611.22	-2.28146	0	0	down
LOC_Os01g71190	1547.45	3075.56	19.3481	-7.31758	0	0	down
LOC_Os01g72009	5401.58	1311.77	9491.38	2.85164	0	0	up
LOC_Os01g72130	1085.98	107.187	2064.77	4.26638	0	0	up
LOC_Os01g72330	2255.44	3588.29	922.588	-1.95873	0	0	down
LOC_Os01g72370	36005.1	56355.6	15654.6	-1.84792	0	0	down
LOC_Os01g72460	718.541	1374.61	62.4744	-4.45407	0	0	down
LOC_Os01g72570	1902.91	3081.23	724.588	-2.08836	0	0	down
LOC_Os01g72800	1712.52	3321.63	103.401	-5.00271	0	0	down
LOC_Os01g72834	1700.33	524.161	2876.5	2.46038	0	0	up
LOC_Os01g72910	880.482	124.851	1636.11	3.71066	0	0	up
LOC_Os01g72980	1216.51	2077.04	355.985	-2.54484	0	0	down
LOC_Os01g72990	2201.75	906.469	3497.03	1.94613	0	0	up
LOC_Os01g73200	1567.8	3066.97	68.6364	-5.47639	0	0	down
LOC_Os01g73450	1515.04	2856.15	173.923	-4.03589	0	0	down
LOC_Os01g73500	1261.58	2492.3	30.8602	-6.34401	0	0	down
LOC_Os01g73900	1907.08	3319.99	494.164	-2.7475	0	0	down
LOC_Os01g73910	2453.3	4361.39	545.206	-3.00059	0	0	down
LOC_Os01g73960	4068.29	6484.33	1652.25	-1.97211	0	0	down
LOC_Os01g74110	1268.01	45.2493	2490.76	5.79557	0	0	up
LOC_Os01g74190	2456.46	4610.5	302.412	-3.92847	0	0	down
LOC_Os01g74410	16802.9	3048.73	30557.2	3.32727	0	0	up
LOC_Os01g74650	11795.5	19759.2	3831.8	-2.36651	0	0	down
LOC_Os02g01010	3796.42	1742.54	5850.3	1.74767	0	0	up
LOC_Os02g01440	1406.76	2564.01	249.509	-3.35877	0	0	down
LOC_Os02g01590	1519.35	2903.41	135.291	-4.42403	0	0	down
LOC_Os02g01890	1148.1	73.5488	2222.65	4.91299	0	0	up
LOC_Os02g02390	2484.82	4830.42	139.23	-5.11973	0	0	down
LOC_Os02g02410	5923.86	2813.49	9034.22	1.68191	0	0	up
LOC_Os02g02520	2363.53	4488.35	238.718	-4.23358	0	0	down
LOC_Os02g03010	1298.58	2313.8	283.358	-3.02986	0	0	down
LOC_Os02g03050	876.428	1660.35	92.5031	-4.16502	0	0	down
LOC_Os02g03230	6162.88	10918.1	1407.65	-2.95574	0	0	down
LOC_Os02g03330	4479.43	8153.56	805.304	-3.34038	0	0	down
LOC_Os02g03720	867.882	1685.36	50.4029	-5.05941	0	0	down
LOC_Os02g04430	835.371	79.6875	1591.06	4.32356	0	0	up
LOC_Os02g04460	3638.2	7144.86	131.549	-5.76508	0	0	down
LOC_Os02g04510	1216.76	2409.23	24.2808	-6.63595	0	0	down
LOC_Os02g04680	1527.94	2624.63	431.246	-2.60465	0	0	down
LOC_Os02g04700	1339.24	284.622	2393.86	3.08062	0	0	up
LOC_Os02g04710	6025.19	9485.02	2565.35	-1.88581	0	0	down
LOC_Os02g05630	7978.81	12144.4	3813.19	-1.67138	0	0	down
LOC_Os02g06300	2764.96	5364.9	165.021	-5.0223	0	0	down
LOC_Os02g07230	2647.11	4578.87	715.343	-2.67841	0	0	down
LOC_Os02g07680	2033.81	3416.88	650.738	-2.39124	0	0	down
LOC_Os02g07820	2129.76	676.279	3583.24	2.40474	0	0	up
LOC_Os02g07930	1755.75	2898.21	613.296	-2.24106	0	0	down
LOC_Os02g08010	1755.65	580.61	2930.69	2.34017	0	0	up
LOC_Os02g08150	1271.46	2506.22	36.6976	-6.09001	0	0	down
LOC_Os02g08380	1789.08	3039.53	538.622	-2.49675	0	0	down
LOC_Os02g09150	6512.29	11707.2	1317.39	-3.15245	0	0	down
LOC_Os02g09220	2158.08	106.473	4209.68	5.3131	0	0	up
LOC_Os02g09250	845.479	1547.57	143.384	-3.43145	0	0	down
LOC_Os02g09490	7024.88	2048.52	12001.2	2.55095	0	0	up
LOC_Os02g09590	2759.44	5420.94	97.9319	-5.78913	0	0	down
LOC_Os02g09930	1653.9	299.343	3008.46	3.32774	0	0	up
LOC_Os02g10120	1486.68	2936.17	37.1961	-6.30794	0	0	down
LOC_Os02g10350	7155.14	14279.4	30.8942	-8.85007	0	0	down
LOC_Os02g10860	819.164	1509.6	128.73	-3.55318	0	0	down
LOC_Os02g13060	1694.81	2944.16	445.455	-2.72597	0	0	down
LOC_Os02g13170	2173.95	3984.83	363.058	-3.45552	0	0	down
LOC_Os02g13970	1743.8	3360.19	127.402	-4.72011	0	0	down
LOC_Os02g14770	13399.6	7964.1	18835	1.24241	0	0	up
LOC_Os02g15560	1362.5	101.526	2623.48	4.68571	0	0	up
LOC_Os02g15660	5344.03	10418.1	270.007	-5.27114	0	0	down
LOC_Os02g15700	2876.77	27.0887	5726.46	7.7033	0	0	up
LOC_Os02g15750	2712.01	5289.46	134.568	-5.2944	0	0	down
LOC_Os02g15810	854.845	90.8164	1618.87	4.15232	0	0	up
LOC_Os02g15900	2883.45	5601.01	165.892	-5.08079	0	0	down
LOC_Os02g17330	1596.44	2595.02	597.852	-2.11758	0	0	down
LOC_Os02g17920	1925.98	3826.92	25.0276	-7.25193	0	0	down
LOC_Os02g17970	3120.97	5635.6	606.335	-3.21673	0	0	down
LOC_Os02g18450	11224.6	22226.5	222.74	-6.64105	0	0	down
LOC_Os02g19820	3270.78	5992.07	549.483	-3.44797	0	0	down
LOC_Os02g19924	1039.99	1904.73	175.257	-3.44079	0	0	down
LOC_Os02g20360	9223.46	4801.99	13644.9	1.50645	0	0	up
LOC_Os02g22260	1710.96	3275.79	146.134	-4.48549	0	0	down
LOC_Os02g26700	8309.22	13151.3	3467.17	-1.92345	0	0	down
LOC_Os02g26860	3960.42	7181.29	739.552	-3.28019	0	0	down
LOC_Os02g27060	3075.26	5356.25	794.268	-2.75366	0	0	down
LOC_Os02g29510	933.249	1779.24	87.2602	-4.35276	0	0	down
LOC_Os02g29550	3516.08	6076.29	955.87	-2.66719	0	0	down
LOC_Os02g29960	750.316	1447.41	53.2204	-4.76823	0	0	down
LOC_Os02g30630	6565.43	10340.1	2790.72	-1.88957	0	0	down
LOC_Os02g30650	1417.5	2753.86	81.1374	-5.09012	0	0	down
LOC_Os02g32009	4158.27	48.5239	8268.02	7.42239	0	0	up
LOC_Os02g32250	2944.58	5329.96	559.201	-3.25241	0	0	down
LOC_Os02g32490	4156.9	1196.48	7117.33	2.573	0	0	up
LOC_Os02g32520	3377.61	5680.06	1075.15	-2.40251	0	0	down
LOC_Os02g32690	2541.43	253.622	4829.24	4.24514	0	0	up
LOC_Os02g32730	2979.93	5060.64	899.233	-2.49289	0	0	down
LOC_Os02g33010	1624.73	2819.73	429.739	-2.71432	0	0	down
LOC_Os02g33149	1253.53	2236.33	270.738	-3.04934	0	0	down
LOC_Os02g33450	7685.13	14378.4	991.858	-3.85738	0	0	down
LOC_Os02g33500	3890.98	7539.46	242.504	-4.96126	0	0	down
LOC_Os02g33610	2154.5	3924.77	384.233	-3.35222	0	0	down
LOC_Os02g34810	8460.07	16798.2	121.987	-7.10548	0	0	down
LOC_Os02g35090	1353.17	2649.83	56.5035	-5.55425	0	0	down
LOC_Os02g35900	1715.96	3385.29	46.6396	-6.18768	0	0	down
LOC_Os02g36140	3070.12	5844.22	296.028	-4.30232	0	0	down
LOC_Os02g36340	4897.62	7312.52	2482.72	-1.55801	0	0	down
LOC_Os02g36380	1915.48	3364.54	466.426	-2.85095	0	0	down
LOC_Os02g36530	2325.38	796.989	3853.77	2.27204	0	0	up
LOC_Os02g36570	6863.1	13573.3	152.868	-6.47188	0	0	down
LOC_Os02g36924	970.696	68.5553	1872.84	4.77219	0	0	up
LOC_Os02g37690	2024.22	3676.65	371.788	-3.30887	0	0	down
LOC_Os02g37800	1040.3	1891.47	189.127	-3.32153	0	0	down
LOC_Os02g38020	6324.28	12578.6	69.9151	-7.48892	0	0	down
LOC_Os02g38210	11358.3	22198.9	517.64	-5.4221	0	0	down
LOC_Os02g38240	1807.9	3561.55	54.2396	-6.03467	0	0	down
LOC_Os02g38820	4549.44	9057.42	41.4521	-7.77193	0	0	down
LOC_Os02g38840	1015.64	191.44	1839.84	3.27005	0	0	up
LOC_Os02g39040	1577.64	2874.92	280.367	-3.35823	0	0	down
LOC_Os02g39160	10979.5	18885.8	3073.23	-2.6199	0	0	down
LOC_Os02g39360	11660.6	21717.1	1604.12	-3.759	0	0	down
LOC_Os02g39530	2099.22	3380	818.436	-2.04531	0	0	down
LOC_Os02g39570	5291.97	9129.53	1454.4	-2.64989	0	0	down
LOC_Os02g39600	956.353	1677.45	235.258	-2.83294	0	0	down
LOC_Os02g39710	2911.7	5665.48	157.915	-5.16601	0	0	down
LOC_Os02g39730	1617.99	3149.62	86.3617	-5.18296	0	0	down
LOC_Os02g39930	2167.72	4317.09	18.3413	-7.87625	0	0	down
LOC_Os02g40180	1095.49	2127.35	63.6197	-5.06963	0	0	down
LOC_Os02g40730	2208.44	64.7993	4352.09	6.07826	0	0	up
LOC_Os02g41470	1710.73	2976.79	444.665	-2.74212	0	0	down
LOC_Os02g41680	1818.83	607.179	3030.47	2.31856	0	0	up
LOC_Os02g41860	9837.23	2059.16	17615.3	3.09901	0	0	up
LOC_Os02g42290	5266.92	9255.1	1278.73	-2.85448	0	0	down
LOC_Os02g42330	3085.15	4874.82	1295.48	-1.91121	0	0	down
LOC_Os02g42570	2247.94	4483.05	12.8224	-8.44808	0	0	down
LOC_Os02g42960	1629.02	3172.53	85.5089	-5.20387	0	0	down
LOC_Os02g43350	3264.62	5390.75	1138.49	-2.24308	0	0	down
LOC_Os02g43410	11017.8	119.322	21916.3	7.52907	0	0	up
LOC_Os02g43500	4826.54	8405.06	1248.03	-2.7517	0	0	down
LOC_Os02g43600	2603.17	5140.86	65.4745	-6.29086	0	0	down
LOC_Os02g43660	1279.16	82.5615	2475.75	4.90769	0	0	up
LOC_Os02g45054	1863.76	3466.34	261.181	-3.73058	0	0	down
LOC_Os02g45670	3150.41	5408.06	892.759	-2.59901	0	0	down
LOC_Os02g45930	3292.36	5191.97	1392.75	-1.89775	0	0	down
LOC_Os02g46030	7003.82	11118.1	2889.56	-1.94414	0	0	down
LOC_Os02g46260	1970.25	3688.95	251.541	-3.86999	0	0	down
LOC_Os02g46660	2481.37	4258.84	703.911	-2.59745	0	0	down
LOC_Os02g47020	29240.6	58410	71.151	-9.67972	0	0	down
LOC_Os02g47120	2805.79	4654.58	956.998	-2.28234	0	0	down
LOC_Os02g47180	1061.52	146.458	1976.58	3.76055	0	0	up
LOC_Os02g47620	2309.4	4602.6	16.1956	-8.16232	0	0	down
LOC_Os02g47800	4064.53	6920.77	1208.3	-2.51879	0	0	down
LOC_Os02g48320	1648.42	84.3755	3212.47	5.24536	0	0	up
LOC_Os02g48560	8859.87	14509.8	3209.91	-2.17662	0	0	down
LOC_Os02g49326	2258.03	4395.18	120.879	-5.18711	0	0	down
LOC_Os02g49440	814.018	1563.47	64.5616	-4.59811	0	0	down
LOC_Os02g49570	1620.27	2693.86	546.678	-2.30065	0	0	down
LOC_Os02g49700	9808.41	14794	4822.8	-1.617	0	0	down
LOC_Os02g50000	1757.43	44.2522	3470.62	6.28775	0	0	up
LOC_Os02g50240	14606.1	7405.83	21806.4	1.55848	0	0	up
LOC_Os02g50560	2588.59	5069.37	107.815	-5.55315	0	0	down
LOC_Os02g51070	1827.51	3424.63	230.394	-3.89385	0	0	down
LOC_Os02g51080	4519.01	8978.32	59.7018	-7.23587	0	0	down
LOC_Os02g51110	8465.58	205.68	16725.5	6.35787	0	0	up
LOC_Os02g51410	2895.24	4670.78	1119.7	-2.05992	0	0	down
LOC_Os02g51470	6314.21	12456.2	172.184	-6.17833	0	0	down
LOC_Os02g51790	2732.06	5352.64	111.48	-5.58573	0	0	down
LOC_Os02g52260	1505.6	2935.59	75.6093	-5.27885	0	0	down
LOC_Os02g52340	2210.2	4039.16	381.232	-3.40622	0	0	down
LOC_Os02g52390	4835.56	8169.72	1501.41	-2.44409	0	0	down
LOC_Os02g52420	1221.48	2180.96	261.998	-3.05609	0	0	down
LOC_Os02g52744	1629.49	2864.91	394.063	-2.86358	0	0	down
LOC_Os02g52940	3514.25	5645.51	1382.99	-2.02876	0	0	down
LOC_Os02g53140	3702.2	6436.08	968.317	-2.7331	0	0	down
LOC_Os02g53770	6187.04	10790.8	1583.31	-2.76866	0	0	down
LOC_Os02g54980	3815.2	7434.38	196.023	-5.24618	0	0	down
LOC_Os02g55120	4987.86	9815.45	160.274	-5.93416	0	0	down
LOC_Os02g55420	5858.6	9673.96	2043.24	-2.24344	0	0	down
LOC_Os02g55480	1808.18	2966.42	649.947	-2.18907	0	0	down
LOC_Os02g55630	3080.25	5706.39	454.111	-3.64913	0	0	down
LOC_Os02g55890	7467.78	980.016	13955.5	3.83227	0	0	up
LOC_Os02g56310	1364.75	301.427	2428.07	3.00761	0	0	up
LOC_Os02g56320	924.815	1662.24	187.388	-3.14679	0	0	down
LOC_Os02g56510	6357.2	783.604	11930.8	3.93091	0	0	up
LOC_Os02g57040	4109.59	6430.1	1789.08	-1.84651	0	0	down
LOC_Os02g57060	2737.79	5133.35	342.232	-3.90688	0	0	down
LOC_Os02g57120	4779.1	9478.85	79.3521	-6.89494	0	0	down
LOC_Os02g57160	7257.58	13409.7	1105.49	-3.60056	0	0	down
LOC_Os02g57290	1487.06	2901.5	72.6135	-5.31875	0	0	down
LOC_Os02g57410	5746.52	8867.11	2625.93	-1.75559	0	0	down
LOC_Os02g57670	1869.59	3712.49	26.7	-7.11151	0	0	down
LOC_Os02g57720	29437.1	4309.09	54565.2	3.66135	0	0	up
LOC_Os02g58120	759.595	1422.99	96.1984	-3.88758	0	0	down
LOC_Os02g58150	847.918	1639.7	56.1329	-4.8767	0	0	down
LOC_Os02g58230	2982.06	4783.47	1180.65	-2.01835	0	0	down
LOC_Os02g58270	1672.24	3037.07	307.411	-3.30411	0	0	down
LOC_Os03g01170	1395.17	2383.59	406.761	-2.55262	0	0	down
LOC_Os03g01300	4872.21	431.939	9312.49	4.42951	0	0	up
LOC_Os03g01830	3070.07	5708.36	431.776	-3.72502	0	0	down
LOC_Os03g01920	997.019	1755.41	238.632	-2.87821	0	0	down
LOC_Os03g02240	3440.19	6486.58	393.802	-4.0425	0	0	down
LOC_Os03g02590	12682.7	25282.5	82.9451	-8.24769	0	0	down
LOC_Os03g02690	852.396	1674.65	30.1437	-5.78555	0	0	down
LOC_Os03g02960	1110.22	2151.49	68.9443	-4.96961	0	0	down
LOC_Os03g03020	1919.22	3773.5	64.942	-5.85748	0	0	down
LOC_Os03g03034	1453.9	338.937	2568.87	2.92542	0	0	up
LOC_Os03g03260	1024.53	1855.86	193.203	-3.26474	0	0	down
LOC_Os03g03360	3108.09	6108.84	107.34	-5.8291	0	0	down
LOC_Os03g03470	1002.95	1972.91	32.9926	-5.90149	0	0	down
LOC_Os03g03810	1367.52	39.8839	2695.17	6.06471	0	0	up
LOC_Os03g03910	10906.2	21776.3	35.9939	-9.24418	0	0	down
LOC_Os03g04100	2430.13	4424.61	435.642	-3.34431	0	0	down
LOC_Os03g04140	3493.11	6290.8	695.414	-3.17652	0	0	down
LOC_Os03g04169	3444.44	5363.92	1524.97	-1.81491	0	0	down
LOC_Os03g04260	1248.19	2324.31	172.069	-3.759	0	0	down
LOC_Os03g04470	1696.94	3219.27	174.599	-4.2035	0	0	down
LOC_Os03g04710	2329.52	4367.79	291.254	-3.90549	0	0	down
LOC_Os03g04770	4298.62	7898.82	698.422	-3.50056	0	0	down
LOC_Os03g04930	3038.61	4770.42	1306.8	-1.86821	0	0	down
LOC_Os03g05290	4395.15	1702.48	7087.82	2.06079	0	0	up
LOC_Os03g05310	1309.1	2309.78	308.416	-2.90473	0	0	down
LOC_Os03g05320	1233.66	2132.38	334.942	-2.67309	0	0	down
LOC_Os03g05530	3366.96	1422.89	5311.03	1.90178	0	0	up
LOC_Os03g05750	947.723	114.692	1780.75	3.94407	0	0	up
LOC_Os03g05800	1233.6	2351.47	115.735	-4.34567	0	0	down
LOC_Os03g05806	917.113	1687.5	146.73	-3.52738	0	0	down
LOC_Os03g05910	1720.76	72.3641	3369.16	5.53546	0	0	up
LOC_Os03g06139	844.035	1646.59	41.4846	-5.31156	0	0	down
LOC_Os03g06740	1668.46	2913.54	423.38	-2.78221	0	0	down
LOC_Os03g07300	12588.6	24193.8	983.369	-4.62075	0	0	down
LOC_Os03g07480	3052.65	4901.55	1203.74	-2.02521	0	0	down
LOC_Os03g07960	2603.76	5124.15	83.3654	-5.94381	0	0	down
LOC_Os03g08070	4024.79	7168.05	881.516	-3.02411	0	0	down
LOC_Os03g08460	1247.94	171.918	2323.97	3.75799	0	0	up
LOC_Os03g08470	7158.13	376.887	13939.4	5.2033	0	0	up
LOC_Os03g08480	1690.35	2865.81	514.877	-2.47441	0	0	down
LOC_Os03g08490	6220.32	10537.2	1903.43	-2.46934	0	0	down
LOC_Os03g08550	3333.23	953.197	5713.27	2.58377	0	0	up
LOC_Os03g08570	2866.68	4609.36	1123.99	-2.0351	0	0	down
LOC_Os03g09020	2220.1	4242.62	197.585	-4.42591	0	0	down
LOC_Os03g09060	1199.27	2330.18	68.3698	-5.08089	0	0	down
LOC_Os03g09250	3998.27	6141.46	1855.08	-1.7268	0	0	down
LOC_Os03g09900	4003.61	1402.15	6605.07	2.23642	0	0	up
LOC_Os03g10060	2434.79	4662.65	206.925	-4.4926	0	0	down
LOC_Os03g10180	6184.54	11785.9	583.154	-4.33746	0	0	down
LOC_Os03g10880	2870.15	5572.39	167.912	-5.05136	0	0	down
LOC_Os03g11120	1589.47	2617.01	561.925	-2.21914	0	0	down
LOC_Os03g11230	1702.86	3326.85	78.86	-5.39507	0	0	down
LOC_Os03g11590	2391.53	955.047	3828.02	2.00268	0	0	up
LOC_Os03g11734	6527.45	431.225	12623.7	4.86559	0	0	up
LOC_Os03g12000	1652.1	2962.76	341.446	-3.11744	0	0	down
LOC_Os03g12020	2360.68	4650.36	71.0029	-6.02933	0	0	down
LOC_Os03g12030	1550.39	2716.16	384.626	-2.82203	0	0	down
LOC_Os03g12290	13064.6	2158.26	23970.9	3.47477	0	0	up
LOC_Os03g12510	1479.09	179.184	2778.99	3.96474	0	0	up
LOC_Os03g12530	986.573	1824.52	148.626	-3.62308	0	0	down
LOC_Os03g14040	1542.26	3067.81	16.7011	-7.52651	0	0	down
LOC_Os03g14050	4482.7	6623.38	2342.02	-1.50009	0	0	down
LOC_Os03g14280	1598.26	2742.92	453.597	-2.59658	0	0	down
LOC_Os03g14450	5168.74	1471.04	8866.44	2.59142	0	0	up
LOC_Os03g14690	2238.62	3757.53	719.715	-2.38431	0	0	down
LOC_Os03g15870	2284.77	4546.56	22.9762	-7.62318	0	0	down
LOC_Os03g16230	1254.41	2307.91	200.899	-3.52066	0	0	down
LOC_Os03g16334	1978.22	3323.4	633.045	-2.39232	0	0	down
LOC_Os03g16430	2262.87	4505.46	20.278	-7.80552	0	0	down
LOC_Os03g16700	5948.14	8691.61	3204.67	-1.43976	0	0	down
LOC_Os03g17070	9004.03	17911.9	96.1162	-7.54695	0	0	down
LOC_Os03g17100	1727.73	470.011	2985.45	2.65909	0	0	up
LOC_Os03g17174	2511.02	5003.67	18.3751	-8.08805	0	0	down
LOC_Os03g17350	1205.98	132.81	2279.16	4.1002	0	0	up
LOC_Os03g17580	1804.88	3519.85	89.898	-5.29031	0	0	down
LOC_Os03g17600	1269.39	2479.05	59.7234	-5.37891	0	0	down
LOC_Os03g17634	737.672	1381.06	94.2791	-3.8766	0	0	down
LOC_Os03g17690	4695.72	1556.12	7835.32	2.33214	0	0	up
LOC_Os03g17870	12376	3314.21	21437.7	2.69305	0	0	up
LOC_Os03g18070	7459.46	12988.2	1930.72	-2.75073	0	0	down
LOC_Os03g18130	3081.42	1044.07	5118.77	2.29608	0	0	up
LOC_Os03g18200	4505.19	8323.01	687.371	-3.59945	0	0	down
LOC_Os03g18264	2968.12	4555.09	1381.15	-1.722	0	0	down
LOC_Os03g18600	1283.32	2140	426.641	-2.32717	0	0	down
LOC_Os03g18850	4236.03	149.022	8323.03	5.80923	0	0	up
LOC_Os03g19510	1549.59	2591.7	507.473	-2.35115	0	0	down
LOC_Os03g19560	7132.14	13861.4	402.867	-5.10692	0	0	down
LOC_Os03g19650	1591.5	3025.4	157.591	-4.26226	0	0	down
LOC_Os03g19760	5580.63	10776.6	384.708	-4.80558	0	0	down
LOC_Os03g20100	5459.39	10789	129.749	-6.38487	0	0	down
LOC_Os03g20380	2759.25	5351.41	167.093	-5.00264	0	0	down
LOC_Os03g20420	1733.99	415.375	3052.6	2.87411	0	0	up
LOC_Os03g20640	1154.03	2150.44	157.62	-3.7682	0	0	down
LOC_Os03g20700	5611.51	11177	46.0451	-7.92997	0	0	down
LOC_Os03g21040	10640.8	1638.6	19642.9	3.58505	0	0	up
LOC_Os03g21370	2987.4	5852.31	122.483	-5.57919	0	0	down
LOC_Os03g21664	1064.63	1961.84	167.421	-3.5499	0	0	down
LOC_Os03g21890	5239.22	9418.95	1059.49	-3.15168	0	0	down
LOC_Os03g21900	3304.1	5917.72	690.482	-3.10002	0	0	down
LOC_Os03g22160	5146.48	9117.36	1175.6	-2.95566	0	0	down
LOC_Os03g22430	2337.58	4077.11	598.041	-2.76857	0	0	down
LOC_Os03g22790	1875.88	3288.69	463.07	-2.82751	0	0	down
LOC_Os03g24020	1996.41	3920.93	71.8885	-5.76595	0	0	down
LOC_Os03g24860	1253.22	2362.98	143.464	-4.0429	0	0	down
LOC_Os03g25330	1672.74	68.843	3276.63	5.57162	0	0	up
LOC_Os03g25960	1810.02	3185.57	434.478	-2.87621	0	0	down
LOC_Os03g28140	1604.23	2681.28	527.188	-2.34637	0	0	down
LOC_Os03g28160	1391.78	2736.42	47.1407	-5.86204	0	0	down
LOC_Os03g28330	20871	3965.29	37776.7	3.2526	0	0	up
LOC_Os03g29190	2293.84	307.344	4280.33	3.79614	0	0	up
LOC_Os03g29240	2809.9	1217.75	4402.05	1.85265	0	0	up
LOC_Os03g31026	4934.75	8307.74	1561.76	-2.41117	0	0	down
LOC_Os03g31150	1375.2	2717.59	32.8171	-6.37715	0	0	down
LOC_Os03g31170	2785.43	4304.56	1266.3	-1.76603	0	0	down
LOC_Os03g31490	3468.37	5819.34	1117.39	-2.38131	0	0	down
LOC_Os03g31690	1891.07	3506.38	275.761	-3.66896	0	0	down
LOC_Os03g31730	6932.92	11067.5	2798.36	-1.98329	0	0	down
LOC_Os03g31750	4169.18	1063.55	7274.81	2.77355	0	0	up
LOC_Os03g32490	13219.7	24347.4	2092.14	-3.54006	0	0	down
LOC_Os03g32499	2355.67	3713.28	998.047	-1.89576	0	0	down
LOC_Os03g34040	4763.28	9421.46	105.103	-6.48634	0	0	down
LOC_Os03g34310	978.197	1765.2	191.197	-3.2047	0	0	down
LOC_Os03g36540	3388.37	6705.86	70.8679	-6.5689	0	0	down
LOC_Os03g36750	4441.33	8754.57	128.096	-6.09121	0	0	down
LOC_Os03g38230	1084.04	2120.24	47.8444	-5.46869	0	0	down
LOC_Os03g41080	8242.94	14801	1684.92	-3.13421	0	0	down
LOC_Os03g44810	1379.92	276.144	2483.69	3.16812	0	0	up
LOC_Os03g45400	2020.51	3618.91	422.119	-3.09828	0	0	down
LOC_Os03g45710	813.066	1567.42	58.71	-4.73995	0	0	down
LOC_Os03g46454	1563.13	366.905	2759.36	2.91254	0	0	up
LOC_Os03g46470	3297.25	35.5368	6558.95	7.55905	0	0	up
LOC_Os03g48000	4462.57	8026.23	898.912	-3.15863	0	0	down
LOC_Os03g48300	3310.98	6203.57	418.392	-3.88892	0	0	down
LOC_Os03g48540	2314.01	347.876	4280.15	3.61525	0	0	up
LOC_Os03g49220	1357.66	2435.99	279.329	-3.12628	0	0	down
LOC_Os03g49440	1348.99	419.925	2278.06	2.44245	0	0	up
LOC_Os03g49630	9538.65	18803.5	273.821	-6.10048	0	0	down
LOC_Os03g49710	2193.74	4316.09	71.3938	-5.91062	0	0	down
LOC_Os03g49720	1859.02	3658.01	60.02	-5.93279	0	0	down
LOC_Os03g50070	3019.1	5037.65	1000.55	-2.3314	0	0	down
LOC_Os03g50080	3115.92	6218.14	13.701	-8.82465	0	0	down
LOC_Os03g50270	2055.6	4036.92	74.2776	-5.76205	0	0	down
LOC_Os03g50310	1493.03	2968.13	17.9221	-7.38099	0	0	down
LOC_Os03g51080	3901.42	1349.5	6453.33	2.25868	0	0	up
LOC_Os03g51950	1682.5	2866.14	498.857	-2.52226	0	0	down
LOC_Os03g51960	1267.67	2373.3	162.032	-3.87378	0	0	down
LOC_Os03g52010	1713.28	3366.14	60.4188	-5.79909	0	0	down
LOC_Os03g52170	8375.53	14989.7	1761.41	-3.08837	0	0	down
LOC_Os03g52230	1377.9	2366.21	389.582	-2.60279	0	0	down
LOC_Os03g52640	1148.57	2114.84	182.305	-3.53527	0	0	down
LOC_Os03g52680	4339.54	6883.43	1795.64	-1.93953	0	0	down
LOC_Os03g52840	44237.6	79676	8799.25	-3.17854	0	0	down
LOC_Os03g53150	1410.86	349.36	2472.36	2.82646	0	0	up
LOC_Os03g53300	1296.24	2451.5	140.987	-4.11788	0	0	down
LOC_Os03g53640	765.078	1476.93	53.2247	-4.7974	0	0	down
LOC_Os03g54000	18055.8	26604.3	9507.16	-1.48466	0	0	down
LOC_Os03g54084	2087.96	3359.48	816.441	-2.04115	0	0	down
LOC_Os03g55240	1563.11	2884.19	242.031	-3.57753	0	0	down
LOC_Os03g55410	1647.99	217.119	3078.87	3.83789	0	0	up
LOC_Os03g55820	1949.36	3581.74	316.967	-3.49879	0	0	down
LOC_Os03g55930	1372.48	2679.31	65.6482	-5.34896	0	0	down
LOC_Os03g55970	3045.65	5658.02	433.283	-3.70663	0	0	down
LOC_Os03g56280	24433.3	47292.3	1574.28	-4.90929	0	0	down
LOC_Os03g56470	1353.31	2480.99	225.64	-3.46231	0	0	down
LOC_Os03g56840	1265.56	2360.86	170.258	-3.79176	0	0	down
LOC_Os03g56869	1312.9	2474.62	151.179	-4.03651	0	0	down
LOC_Os03g57070	1828.82	3150.22	507.429	-2.63371	0	0	down
LOC_Os03g57220	30430.4	60849.4	11.2726	-12.3841	0	0	down
LOC_Os03g57240	962.738	1863.59	61.884	-4.91262	0	0	down
LOC_Os03g57545	1631.86	2833.38	430.334	-2.7175	0	0	down
LOC_Os03g57840	2388.5	4466.76	310.243	-3.85024	0	0	down
LOC_Os03g58040	3368	1319.24	5416.76	2.03831	0	0	up
LOC_Os03g58080	1259.2	2230.24	288.154	-2.94985	0	0	down
LOC_Os03g58540	778.095	1487	69.1937	-4.42755	0	0	down
LOC_Os03g58580	1434.11	2577.15	291.066	-3.1473	0	0	down
LOC_Os03g59320	5054.04	9943.56	164.511	-5.91909	0	0	down
LOC_Os03g59640	4181.49	8179.07	183.916	-5.4735	0	0	down
LOC_Os03g60100	2451.37	4849.59	53.1516	-6.52005	0	0	down
LOC_Os03g60910	1728.05	2968.45	487.657	-2.60593	0	0	down
LOC_Os03g61220	11430.9	22484.8	376.96	-5.89789	0	0	down
LOC_Os03g61260	2263.42	4433.61	93.2299	-5.5686	0	0	down
LOC_Os03g61890	5614.01	10516.5	711.476	-3.88656	0	0	down
LOC_Os03g61960	3097.93	1293.41	4902.44	1.92396	0	0	up
LOC_Os03g62240	2174.22	3912.88	435.561	-3.16652	0	0	down
LOC_Os03g62510	1483.03	2858.59	107.471	-4.73366	0	0	down
LOC_Os03g62610	2364.92	4303.84	426.009	-3.33468	0	0	down
LOC_Os03g62630	3184.46	6332.11	36.7999	-7.42779	0	0	down
LOC_Os03g62780	1949.76	3873.62	25.8993	-7.23492	0	0	down
LOC_Os03g63360	1068.69	2037.01	100.383	-4.34305	0	0	down
LOC_Os03g63370	805.408	1478.41	132.404	-3.48748	0	0	down
LOC_Os03g63480	5680.1	10953.5	406.658	-4.7522	0	0	down
LOC_Os03g63950	14273.4	28425.6	121.118	-7.87759	0	0	down
LOC_Os03g64020	1954.64	3848.77	60.5136	-5.98627	0	0	down
LOC_Os03g64070	2129.01	3442.05	815.965	-2.07739	0	0	down
LOC_Os03g64350	1361.43	2569.5	153.368	-4.06543	0	0	down
LOC_Os04g01540	2046.06	3910.5	181.621	-4.42445	0	0	down
LOC_Os04g02050	2709.43	5142.6	276.26	-4.21907	0	0	down
LOC_Os04g02780	1485.3	2526.63	443.959	-2.50835	0	0	down
LOC_Os04g02910	4811.04	8584.19	1037.9	-3.04813	0	0	down
LOC_Os04g12010	951.794	172.185	1731.4	3.33062	0	0	up
LOC_Os04g17479	2692.95	4318.25	1067.64	-2.01536	0	0	down
LOC_Os04g23040	1393.68	2690.36	97.004	-4.79518	0	0	down
LOC_Os04g23820	1431.46	2524.66	338.266	-2.90104	0	0	down
LOC_Os04g23890	5562	10843.5	280.485	-5.27041	0	0	down
LOC_Os04g25400	7793.46	13354.6	2232.3	-2.58013	0	0	down
LOC_Os04g25440	3682.58	5841.04	1524.11	-1.9376	0	0	down
LOC_Os04g26920	7620.66	14953.9	287.399	-5.70262	0	0	down
LOC_Os04g27250	2739.13	4989.68	488.578	-3.35126	0	0	down
LOC_Os04g30490	1045.07	200.499	1889.64	3.23134	0	0	up
LOC_Os04g31040	3721.87	7434.18	9.5582	-9.59248	0	0	down
LOC_Os04g31120	4541.87	6649.94	2433.81	-1.45034	0	0	down
LOC_Os04g32560	14510.8	22636.9	6384.65	-1.826	0	0	down
LOC_Os04g32920	6611.23	785.677	12436.8	3.98329	0	0	up
LOC_Os04g33190	5668.69	8909.39	2428	-1.87549	0	0	down
LOC_Os04g33210	1417.36	2483.3	351.408	-2.82244	0	0	down
LOC_Os04g33310	1415.1	2515.71	314.497	-2.9991	0	0	down
LOC_Os04g33920	1984.43	478.244	3490.62	2.87035	0	0	up
LOC_Os04g34170	4184.59	666.563	7702.61	3.52782	0	0	up
LOC_Os04g35570	4364.57	7493.65	1235.5	-2.60014	0	0	down
LOC_Os04g36062	1524.21	2618.35	430.08	-2.60549	0	0	down
LOC_Os04g36720	7760.96	15456.4	65.4988	-7.87868	0	0	down
LOC_Os04g36760	3347.45	6500.16	194.749	-5.06149	0	0	down
LOC_Os04g37580	2305.56	4293.79	317.342	-3.75653	0	0	down
LOC_Os04g37920	4031.5	7769.92	293.079	-4.72737	0	0	down
LOC_Os04g38680	1417.16	2370.11	464.206	-2.35167	0	0	down
LOC_Os04g38750	2031.94	3916.77	147.118	-4.7364	0	0	down
LOC_Os04g39060	1389.19	2606.99	171.4	-3.92695	0	0	down
LOC_Os04g39190	1571.96	2662.45	481.462	-2.4654	0	0	down
LOC_Os04g39270	1589.04	2739.24	438.85	-2.64323	0	0	down
LOC_Os04g39320	3313.15	50.3633	6575.95	7.04699	0	0	up
LOC_Os04g40950	8524.24	3844.81	13203.7	1.78083	0	0	up
LOC_Os04g41150	1233.99	2150.59	317.39	-2.75924	0	0	down
LOC_Os04g41340	9936.32	19845.5	27.1472	-9.5136	0	0	down
LOC_Os04g41560	2147.94	4093.54	202.341	-4.33816	0	0	down
LOC_Os04g41970	1931.14	147.862	3714.42	4.6622	0	0	up
LOC_Os04g42020	3667.31	7189.84	144.783	-5.6334	0	0	down
LOC_Os04g42420	6475.9	11176.8	1774.98	-2.65485	0	0	down
LOC_Os04g43200	763.988	1426.51	101.46	-3.81333	0	0	down
LOC_Os04g43390	757.303	1466.23	48.3728	-4.92691	0	0	down
LOC_Os04g43650	963.765	1868.04	59.4875	-4.97703	0	0	down
LOC_Os04g45490	9834.83	19548.9	120.726	-7.33828	0	0	down
LOC_Os04g45810	2255.49	3899.64	611.346	-2.6743	0	0	down
LOC_Os04g45900	1917.51	570.192	3264.83	2.51373	0	0	up
LOC_Os04g46010	2169.3	4243.01	95.5812	-5.47463	0	0	down
LOC_Os04g46390	18185.6	30065.7	6305.59	-2.25347	0	0	down
LOC_Os04g46880	5724.32	9502.37	1946.27	-2.28741	0	0	down
LOC_Os04g47190	1384.65	2392.04	377.262	-2.66353	0	0	down
LOC_Os04g47810	1293.62	93.9463	2493.29	4.7376	0	0	up
LOC_Os04g47860	3566.72	5974.19	1159.25	-2.36559	0	0	down
LOC_Os04g48390	1737.76	3415.53	59.985	-5.8279	0	0	down
LOC_Os04g48800	3133.87	5159.51	1108.23	-2.21745	0	0	down
LOC_Os04g48880	1539.58	2992.47	86.6982	-5.11324	0	0	down
LOC_Os04g49350	4281.15	8468.39	93.9166	-6.49792	0	0	down
LOC_Os04g49570	1584.9	2999.34	170.458	-4.13288	0	0	down
LOC_Os04g49900	1065.76	57.3383	2074.19	5.18828	0	0	up
LOC_Os04g50110	1607.94	3148.3	67.5675	-5.54037	0	0	down
LOC_Os04g51280	1105.88	2110.53	101.227	-4.37806	0	0	down
LOC_Os04g51400	4780.26	7564.11	1996.4	-1.92091	0	0	down
LOC_Os04g51560	2215.87	625.287	3806.45	2.61084	0	0	up
LOC_Os04g51792	1646.32	3195.95	96.6935	-5.04415	0	0	down
LOC_Os04g51809	1901.63	3086.56	716.693	-2.10634	0	0	down
LOC_Os04g52100	895.997	1703.16	88.8331	-4.26626	0	0	down
LOC_Os04g52130	4866.95	8567.44	1166.46	-2.87748	0	0	down
LOC_Os04g52140	1343.07	170.389	2515.76	3.88052	0	0	up
LOC_Os04g52504	1443.81	260.765	2626.85	3.33037	0	0	up
LOC_Os04g52660	1376.13	2500.63	251.623	-3.31402	0	0	down
LOC_Os04g52970	1987.9	630.255	3345.54	2.40723	0	0	up
LOC_Os04g53230	8736.94	15735	1738.88	-3.1778	0	0	down
LOC_Os04g53310	1714.73	2999.72	429.741	-2.80464	0	0	down
LOC_Os04g53620	18560.3	8478.27	28642.3	1.75665	0	0	up
LOC_Os04g53680	847.229	1660.04	34.4133	-5.57839	0	0	down
LOC_Os04g54474	3248.21	1039.49	5456.93	2.39376	0	0	up
LOC_Os04g54630	907.368	1742.21	72.5215	-4.58783	0	0	down
LOC_Os04g54790	758.501	1432.67	84.3348	-4.08571	0	0	down
LOC_Os04g55050	983.857	1747.28	220.436	-2.98472	0	0	down
LOC_Os04g55180	1524.55	2954.28	94.8256	-4.95992	0	0	down
LOC_Os04g55230	14703.3	27977.6	1429.02	-4.29195	0	0	down
LOC_Os04g55410	3028.38	1193.68	4863.09	2.02376	0	0	up
LOC_Os04g55800	1552.16	3082.32	22.0112	-7.13734	0	0	down
LOC_Os04g55850	3004.58	934.828	5074.33	2.4397	0	0	up
LOC_Os04g56320	1756.83	3499.2	14.4654	-7.90638	0	0	down
LOC_Os04g56400	30070.7	59234.9	906.436	-6.02989	0	0	down
LOC_Os04g56430	8533	2678.61	14387.4	2.42498	0	0	up
LOC_Os04g56710	3650.83	6371.87	929.781	-2.77637	0	0	down
LOC_Os04g57210	2922.06	4587.26	1256.86	-1.86715	0	0	down
LOC_Os04g57300	7600.29	11857	3343.58	-1.8261	0	0	down
LOC_Os04g57440	4544.72	1905.31	7184.12	1.91552	0	0	up
LOC_Os04g57560	4900.6	2076.56	7724.64	1.89799	0	0	up
LOC_Os04g58200	1150.02	2210.67	89.371	-4.62893	0	0	down
LOC_Os04g58410	1239.19	2153.41	324.969	-2.72818	0	0	down
LOC_Os04g58710	11814.9	19868.9	3760.9	-2.4013	0	0	down
LOC_Os04g58730	3888.4	7689.68	87.1322	-6.46102	0	0	down
LOC_Os04g58780	2013.01	3873.31	152.708	-4.67003	0	0	down
LOC_Os04g58960	1135.69	201.758	2069.61	3.35424	0	0	up
LOC_Os04g59040	3425.48	1621.91	5229.06	1.68727	0	0	up
LOC_Os04g59150	3796.54	255.381	7337.7	4.83806	0	0	up
LOC_Os04g59440	884.173	1729.97	38.3755	-5.48849	0	0	down
LOC_Os04g59494	4340.44	6866.46	1814.42	-1.92032	0	0	down
LOC_Os04g59570	853.082	1543.36	162.801	-3.24774	0	0	down
LOC_Os04g59600	2256.47	3825.66	687.279	-2.47573	0	0	down
LOC_Os04g59610	2101.11	3980.89	221.337	-4.16827	0	0	down
LOC_Os05g01110	2737.03	5320.59	153.462	-5.12177	0	0	down
LOC_Os05g01270	6813.9	11936.7	1691.07	-2.82011	0	0	down
LOC_Os05g01530	2736.68	5445.51	27.8373	-7.61672	0	0	down
LOC_Os05g01750	2110	3812.33	407.668	-3.2231	0	0	down
LOC_Os05g01950	3582	7132.92	31.0773	-7.84862	0	0	down
LOC_Os05g01970	1399.08	2669.71	128.455	-4.37815	0	0	down
LOC_Os05g02220	4593.39	7856.06	1330.73	-2.56168	0	0	down
LOC_Os05g02310	1306.23	316.388	2296.08	2.86056	0	0	up
LOC_Os05g02420	43929.4	14001.4	73857.4	2.39972	0	0	up
LOC_Os05g03610	1441.01	431.68	2450.34	2.50765	0	0	up
LOC_Os05g04170	1858.72	3193.86	523.576	-2.60903	0	0	down
LOC_Os05g04510	45944.9	20204.3	71685.5	1.82713	0	0	up
LOC_Os05g04584	2691.68	1138.01	4245.36	1.89894	0	0	up
LOC_Os05g04610	1552.27	2907.25	197.303	-3.88072	0	0	down
LOC_Os05g04620	6389.03	10965	1813.02	-2.59638	0	0	down
LOC_Os05g05140	1279.61	2182.61	376.6	-2.53492	0	0	down
LOC_Os05g05480	1087.08	2013.46	160.693	-3.64823	0	0	down
LOC_Os05g05600	3877.52	7111.72	643.323	-3.46486	0	0	down
LOC_Os05g06780	3744.89	514.813	6974.96	3.76486	0	0	up
LOC_Os05g06890	1932.55	3483.44	381.672	-3.18875	0	0	down
LOC_Os05g06990	1127.07	289.557	1964.59	2.761	0	0	up
LOC_Os05g07130	7813.42	14789.9	836.913	-4.14268	0	0	down
LOC_Os05g07632	1725.9	3051.87	399.92	-2.93232	0	0	down
LOC_Os05g07860	2621.45	4232.01	1010.88	-2.06531	0	0	down
LOC_Os05g07870	2001.32	3792.57	210.082	-4.1756	0	0	down
LOC_Os05g09400	1401.09	2724.77	77.4111	-5.139	0	0	down
LOC_Os05g09728	709.214	1335.38	83.0445	-4.00819	0	0	down
LOC_Os05g11064	843.224	1602.28	84.1687	-4.25233	0	0	down
LOC_Os05g11090	1131.54	2010.63	252.437	-2.99374	0	0	down
LOC_Os05g11260	5195.03	9641.57	748.494	-3.68683	0	0	down
LOC_Os05g12474	2109.77	3761.36	458.168	-3.03684	0	0	down
LOC_Os05g12630	717.149	1367.17	67.1267	-4.34698	0	0	down
LOC_Os05g13900	3529.94	148.783	6911.09	5.53848	0	0	up
LOC_Os05g14194	3794.56	6236.26	1352.85	-2.20456	0	0	down
LOC_Os05g15160	1148.83	2242.7	54.9539	-5.34608	0	0	down
LOC_Os05g15360	1875.91	3299.45	452.371	-2.86666	0	0	down
LOC_Os05g15630	1513.59	107.169	2920.02	4.78001	0	0	up
LOC_Os05g16740	1297.68	313.952	2281.4	2.85502	0	0	up
LOC_Os05g16930	1654.06	30.1422	3277.98	6.78361	0	0	up
LOC_Os05g19380	709.678	1345.97	73.3842	-4.19403	0	0	down
LOC_Os05g19910	1819.67	25.0076	3614.33	7.18419	0	0	up
LOC_Os05g22614	2627.87	5237.62	18.127	-8.17708	0	0	down
LOC_Os05g22730	2164.07	4288.64	39.5076	-6.75554	0	0	down
LOC_Os05g23740	6613.6	11287.5	1939.72	-2.54071	0	0	down
LOC_Os05g23880	1660.75	2818.92	502.584	-2.48593	0	0	down
LOC_Os05g24650	3370.56	1674.84	5066.28	1.5966	0	0	up
LOC_Os05g25400	884.395	1689.06	79.7288	-4.41541	0	0	down
LOC_Os05g25840	3593.51	6078.11	1108.9	-2.45434	0	0	down
LOC_Os05g27100	1600.96	3179.6	22.3157	-7.16339	0	0	down
LOC_Os05g28200	2897.96	5324.55	471.373	-3.4976	0	0	down
LOC_Os05g28500	2614.87	4774.98	454.752	-3.39339	0	0	down
LOC_Os05g29760	6871.97	13277.1	466.796	-4.82927	0	0	down
LOC_Os05g29790	1542.19	83.1398	3001.24	5.17853	0	0	up
LOC_Os05g30220	1310.1	2481.46	138.738	-4.16135	0	0	down
LOC_Os05g30350	4886.47	8776.14	996.806	-3.13895	0	0	down
LOC_Os05g31680	3305.17	6403.46	206.879	-4.95082	0	0	down
LOC_Os05g32140	1532.63	2732.84	332.421	-3.04036	0	0	down
LOC_Os05g32220	6755.49	12756.7	754.274	-4.08012	0	0	down
LOC_Os05g32390	2683.26	4863.37	503.141	-3.27455	0	0	down
LOC_Os05g32680	1061.35	1841.77	280.934	-2.71337	0	0	down
LOC_Os05g32970	2322.74	4400.19	245.28	-4.16221	0	0	down
LOC_Os05g33080	950.55	1864.88	36.2189	-5.69648	0	0	down
LOC_Os05g33130	1324.01	76.9237	2571.09	5.07109	0	0	up
LOC_Os05g33290	2890.37	5659.57	121.165	-5.55159	0	0	down
LOC_Os05g33380	5373.05	2755.09	7991.01	1.53778	0	0	up
LOC_Os05g33510	2782.03	5173.04	391.018	-3.72606	0	0	down
LOC_Os05g33520	2734.64	5443.65	25.6363	-7.74348	0	0	down
LOC_Os05g33620	4163.5	7867.99	459.01	-4.09892	0	0	down
LOC_Os05g33840	1718.01	2952.91	483.116	-2.61143	0	0	down
LOC_Os05g34630	1436.01	2823.28	48.7358	-5.84737	0	0	down
LOC_Os05g34650	6872.97	10851.7	2894.2	-1.90652	0	0	down
LOC_Os05g35540	1604.12	3146.7	61.5376	-5.67441	0	0	down
LOC_Os05g36994	2088.3	4022.79	153.804	-4.70602	0	0	down
LOC_Os05g37830	1457.95	440.597	2475.3	2.48851	0	0	up
LOC_Os05g37970	1343.06	189.234	2496.89	3.71051	0	0	up
LOC_Os05g39230	1899.7	3610.02	189.386	-4.25658	0	0	down
LOC_Os05g39990	1170.41	2076.83	263.986	-2.97503	0	0	down
LOC_Os05g40180	1767.87	3509.6	26.1381	-7.06195	0	0	down
LOC_Os05g40260	779.657	1440.61	118.707	-3.60211	0	0	down
LOC_Os05g41640	25455	50415.8	494.193	-6.67397	0	0	down
LOC_Os05g41990	1016.02	121.757	1910.29	3.97315	0	0	up
LOC_Os05g42250	1898.93	3783.85	14.007	-8.07661	0	0	down
LOC_Os05g42350	3983.78	6105.84	1861.73	-1.71379	0	0	down
LOC_Os05g43650	1851.82	3402.01	301.626	-3.49593	0	0	down
LOC_Os05g44020	1486.8	2777.66	195.947	-3.82678	0	0	down
LOC_Os05g44300	1367.49	2545.04	189.935	-3.74436	0	0	down
LOC_Os05g45030	3113.1	6173.31	52.8985	-6.86132	0	0	down
LOC_Os05g45350	2344.8	4311.53	378.07	-3.51011	0	0	down
LOC_Os05g45400	6154.04	11038.6	1269.45	-3.11895	0	0	down
LOC_Os05g46480	4292.83	7223.62	1362.05	-2.4072	0	0	down
LOC_Os05g46580	1630.69	434.118	2827.26	2.70146	0	0	up
LOC_Os05g47560	7204.28	13772.4	636.127	-4.43741	0	0	down
LOC_Os05g47700	14377.5	801.66	27953.3	5.12795	0	0	up
LOC_Os05g47780	3868.71	6192.74	1544.67	-2.00306	0	0	down
LOC_Os05g47870	833.988	1583.91	84.0703	-4.23675	0	0	down
LOC_Os05g48010	1094.87	274.877	1914.87	2.80035	0	0	up
LOC_Os05g48040	1473.5	499.742	2447.26	2.29572	0	0	up
LOC_Os05g48390	11119.9	5326.69	16913.2	1.66604	0	0	up
LOC_Os05g48630	5456.4	10890.7	22.0516	-8.95773	0	0	down
LOC_Os05g48660	1478.98	405.491	2552.48	2.65322	0	0	up
LOC_Os05g48790	1192.48	2091.04	293.923	-2.82973	0	0	down
LOC_Os05g48800	8519.52	12615.4	4423.64	-1.51224	0	0	down
LOC_Os05g48870	3082.01	4713.91	1450.11	-1.70034	0	0	down
LOC_Os05g49060	1682.94	3294.44	71.4381	-5.51973	0	0	down
LOC_Os05g49200	21128.6	9742.78	32514.4	1.739	0	0	up
LOC_Os05g49290	2758.97	1039.64	4478.3	2.11105	0	0	up
LOC_Os05g49380	2065.89	3821.54	310.247	-3.62361	0	0	down
LOC_Os05g49650	943.552	1815.29	71.81	-4.65414	0	0	down
LOC_Os05g49800	8709.22	14451.2	2967.27	-2.28422	0	0	down
LOC_Os05g49970	6897.27	13140.1	654.47	-4.32732	0	0	down
LOC_Os05g50380	2515.17	4304.66	725.681	-2.56842	0	0	down
LOC_Os05g50550	3819.43	7034.94	603.917	-3.54185	0	0	down
LOC_Os05g50750	6448.8	1017.36	11880.2	3.54476	0	0	up
LOC_Os05g50840	5313.77	8757.05	1870.49	-2.2264	0	0	down
LOC_Os05g50950	817.68	1566.58	68.7764	-4.50738	0	0	down
LOC_Os05g50980	925.957	1662.26	189.657	-3.12874	0	0	down
LOC_Os05g51450	3458.61	6214.27	702.959	-3.14494	0	0	down
LOC_Os05g51620	3006.86	5860.46	153.258	-5.25557	0	0	down
LOC_Os06g01250	3051.18	5674.85	427.518	-3.72833	0	0	down
LOC_Os06g01400	1909.73	3441.14	378.318	-3.18503	0	0	down
LOC_Os06g01460	1928.35	3562.53	294.171	-3.59672	0	0	down
LOC_Os06g01760	8018.98	3606.17	12431.8	1.78536	0	0	up
LOC_Os06g01850	12546.3	25073.6	19.0448	-10.3677	0	0	down
LOC_Os06g01966	1413.21	2738.43	87.9934	-4.96576	0	0	down
LOC_Os06g02120	1393	2573.55	212.462	-3.60318	0	0	down
LOC_Os06g02144	7109.97	4006.82	10213.1	1.34979	0	0	up
LOC_Os06g02380	13084.9	22507.7	3662.22	-2.61979	0	0	down
LOC_Os06g02500	1338.47	2577.42	99.531	-4.70239	0	0	down
LOC_Os06g03860	6649.14	9538.87	3759.4	-1.34307	0	0	down
LOC_Os06g03990	4638.32	8613.12	663.522	-3.69781	0	0	down
LOC_Os06g04270	38769.2	65483	12055.3	-2.4414	0	0	down
LOC_Os06g04530	2916.95	4697.75	1136.14	-2.04772	0	0	down
LOC_Os06g05060	2918.96	4610.54	1227.37	-1.91046	0	0	down
LOC_Os06g05390	2973.28	5636.04	310.511	-4.17872	0	0	down
LOC_Os06g05440	2387.63	4059.85	715.399	-2.50451	0	0	down
LOC_Os06g05630	1363.23	2349.67	376.798	-2.63987	0	0	down
LOC_Os06g05860	5128.03	8274.59	1981.47	-2.06196	0	0	down
LOC_Os06g06470	2213.52	816.804	3610.24	2.14409	0	0	up
LOC_Os06g07040	1856.46	36.0855	3676.84	6.68331	0	0	up
LOC_Os06g08080	6242.89	2909.93	9575.86	1.71884	0	0	up
LOC_Os06g08670	1143.45	2085.83	201.067	-3.37777	0	0	down
LOC_Os06g08910	1216.06	2283.63	148.5	-3.94376	0	0	down
LOC_Os06g09090	1384.31	2644.69	123.932	-4.41329	0	0	down
LOC_Os06g09450	14866.2	4509.71	25222.7	2.48401	0	0	up
LOC_Os06g09890	10800.5	17054.4	4546.68	-1.90715	0	0	down
LOC_Os06g09900	8821.73	16542.2	1101.32	-3.90879	0	0	down
LOC_Os06g11380	3245.32	5519.52	971.118	-2.50639	0	0	down
LOC_Os06g11860	2228.15	620.584	3835.71	2.62791	0	0	up
LOC_Os06g12630	1904.24	3531.52	276.957	-3.67559	0	0	down
LOC_Os06g13050	1293.78	2194.91	392.652	-2.48153	0	0	down
LOC_Os06g13660	5104.84	10035.6	174.05	-5.84834	0	0	down
LOC_Os06g15370	1160.66	2062.48	258.846	-2.99385	0	0	down
LOC_Os06g16350	2049.79	175.766	3923.81	4.48529	0	0	up
LOC_Os06g17970	3760.32	7322.68	197.954	-5.21105	0	0	down
LOC_Os06g18010	1208.81	2392.22	25.4007	-6.55853	0	0	down
LOC_Os06g18670	2372.98	4733.57	12.395	-8.59313	0	0	down
LOC_Os06g19444	3394.13	5330.27	1457.99	-1.87016	0	0	down
LOC_Os06g20320	3595.38	6864.55	326.208	-4.3964	0	0	down
LOC_Os06g21380	2831.83	5474.55	189.114	-4.85509	0	0	down
LOC_Os06g22060	1565.39	2973.34	157.445	-4.23536	0	0	down
LOC_Os06g22690	1882.29	3610.21	154.369	-4.54819	0	0	down
LOC_Os06g23274	998.882	1809.32	188.442	-3.26632	0	0	down
LOC_Os06g24730	2034.44	3335.35	733.53	-2.18463	0	0	down
LOC_Os06g27560	3307.7	1264.72	5350.69	2.08017	0	0	up
LOC_Os06g27760	1950.7	3873.98	27.4156	-7.14089	0	0	down
LOC_Os06g28524	3013.81	5034.68	992.944	-2.34145	0	0	down
LOC_Os06g28840	879.726	1587.58	171.875	-3.21115	0	0	down
LOC_Os06g30380	1366.7	2378.69	354.709	-2.74595	0	0	down
LOC_Os06g33710	6792.79	11003.6	2581.94	-2.09104	0	0	down
LOC_Os06g34570	2004.61	3572.63	436.587	-3.032	0	0	down
LOC_Os06g35160	2784.1	5494.59	73.6132	-6.22243	0	0	down
LOC_Os06g36070	1963.76	326.262	3601.25	3.46501	0	0	up
LOC_Os06g36840	1685.4	3354.61	16.1892	-7.68161	0	0	down
LOC_Os06g37150	1635.21	3248.7	21.72	-7.23202	0	0	down
LOC_Os06g37610	2203.53	4212.22	194.838	-4.43341	0	0	down
LOC_Os06g38320	2424.58	3853.54	995.625	-1.95276	0	0	down
LOC_Os06g39110	1547.61	378.941	2716.27	2.84968	0	0	up
LOC_Os06g39906	826.842	1548.81	104.878	-3.88938	0	0	down
LOC_Os06g40640	13700.6	27351.8	49.5276	-9.11436	0	0	down
LOC_Os06g40940	27221.3	54100.3	342.181	-7.3068	0	0	down
LOC_Os06g41360	2571.33	3979.78	1162.89	-1.77565	0	0	down
LOC_Os06g41810	1031.84	1823.46	240.225	-2.92398	0	0	down
LOC_Os06g41990	6364.57	9422.7	3306.44	-1.51122	0	0	down
LOC_Os06g42790	2086.2	3280.54	891.857	-1.87847	0	0	down
LOC_Os06g43140	1985.97	3693.75	278.185	-3.73294	0	0	down
LOC_Os06g43800	2971.9	5753.15	190.639	-4.91882	0	0	down
LOC_Os06g43860	4942.19	7593.62	2290.76	-1.72925	0	0	down
LOC_Os06g43900	2060.95	4043.73	78.1698	-5.69685	0	0	down
LOC_Os06g44450	6193.96	12224.9	162.978	-6.22732	0	0	down
LOC_Os06g44500	1667.04	2911.16	422.915	-2.78437	0	0	down
LOC_Os06g44610	976.512	1915.78	37.2446	-5.68108	0	0	down
LOC_Os06g45340	1009.56	1986.1	33.0059	-5.91053	0	0	down
LOC_Os06g45370	1002.61	1971.56	33.6651	-5.87573	0	0	down
LOC_Os06g45480	8496.69	13547	3446.39	-1.97442	0	0	down
LOC_Os06g45500	3143.68	1149.44	5137.91	2.16189	0	0	up
LOC_Os06g45710	2747.95	1045.29	4450.62	2.0877	0	0	up
LOC_Os06g45820	15032.5	28646.4	1418.61	-4.33466	0	0	down
LOC_Os06g46670	1239.88	2315.66	164.098	-3.81699	0	0	down
LOC_Os06g46930	2259.59	4446.81	72.3652	-5.94665	0	0	down
LOC_Os06g47130	1890.25	3488.88	291.624	-3.57976	0	0	down
LOC_Os06g47550	3118.95	5333.67	904.222	-2.5602	0	0	down
LOC_Os06g48180	1551.97	528.745	2575.19	2.281	0	0	up
LOC_Os06g48620	3788.8	6655.85	921.761	-2.85249	0	0	down
LOC_Os06g49040	2189.71	3422.08	957.332	-1.83836	0	0	down
LOC_Os06g49110	4668.14	7521.49	1814.79	-2.05021	0	0	down
LOC_Os06g49120	5398.66	10752.4	44.8998	-7.91144	0	0	down
LOC_Os06g49640	2590.77	4953.25	228.298	-4.44256	0	0	down
LOC_Os06g50230	2274.93	3997.95	551.913	-2.85745	0	0	down
LOC_Os06g50870	1518.71	2637.11	400.31	-2.71856	0	0	down
LOC_Os06g51029	7220.36	13587	853.747	-3.99181	0	0	down
LOC_Os06g51150	6683.65	2828.97	10538.3	1.89612	0	0	up
LOC_Os06g51290	3304.26	6438.6	169.916	-5.24245	0	0	down
LOC_Os07g01020	4230.31	7235.9	1224.72	-2.56309	0	0	down
LOC_Os07g01030	3456.23	6486.47	425.988	-3.93065	0	0	down
LOC_Os07g01130	2053.53	841.771	3265.29	1.95597	0	0	up
LOC_Os07g01214	1358.32	2606.46	110.181	-4.5654	0	0	down
LOC_Os07g01560	2144.42	402.487	3886.36	3.27408	0	0	up
LOC_Os07g01760	35486	67281.6	3690.44	-4.18808	0	0	down
LOC_Os07g02800	2161.86	3616.23	707.498	-2.35426	0	0	down
LOC_Os07g04180	4265.56	6966.07	1565.06	-2.15309	0	0	down
LOC_Os07g04930	7546.41	13005.1	2087.71	-2.63951	0	0	down
LOC_Os07g05010	2494.11	4818.68	169.533	-4.82779	0	0	down
LOC_Os07g05040	1011.72	1925.18	98.2482	-4.29546	0	0	down
LOC_Os07g05620	2058.66	722.636	3394.68	2.23051	0	0	up
LOC_Os07g05820	26067.6	52012.1	123.133	-8.71887	0	0	down
LOC_Os07g05940	1306.13	179.929	2432.34	3.75416	0	0	up
LOC_Os07g06450	3483.06	6936.41	29.7068	-7.86476	0	0	down
LOC_Os07g06644	1418.48	2618.31	218.642	-3.58038	0	0	down
LOC_Os07g06660	3751.73	7328.5	174.954	-5.38952	0	0	down
LOC_Os07g06840	993.773	1887.98	99.565	-4.24849	0	0	down
LOC_Os07g07310	2077.34	4031.63	123.057	-5.03931	0	0	down
LOC_Os07g07930	2447.83	714.408	4181.25	2.5465	0	0	up
LOC_Os07g07990	1610.85	423.66	2798.05	2.72689	0	0	up
LOC_Os07g08030	4101.5	7296.37	906.638	-3.00886	0	0	down
LOC_Os07g08710	3488.7	1503.58	5473.82	1.86468	0	0	up
LOC_Os07g08970	2093.93	3851.14	336.709	-3.51596	0	0	down
LOC_Os07g09040	1189.56	2287.33	91.7861	-4.64181	0	0	down
LOC_Os07g09150	2748.03	5035.07	460.98	-3.44975	0	0	down
LOC_Os07g09800	983.605	1860.43	106.776	-4.12202	0	0	down
LOC_Os07g10490	3765.91	6006.11	1525.71	-1.97688	0	0	down
LOC_Os07g11110	6637.91	13267.7	8.08911	-10.6647	0	0	down
LOC_Os07g11280	973.583	1786.14	161.027	-3.46601	0	0	down
LOC_Os07g13234	3497.56	6267.45	727.672	-3.1052	0	0	down
LOC_Os07g14270	7158.06	3410.39	10905.7	1.67607	0	0	up
LOC_Os07g14850	4272.02	2098.77	6445.27	1.61873	0	0	up
LOC_Os07g15370	6314.66	266.262	12363.1	5.53413	0	0	up
LOC_Os07g15460	27353.7	43492.3	11215.1	-1.95527	0	0	down
LOC_Os07g15670	914.156	1720.61	107.699	-4.00044	0	0	down
LOC_Os07g18720	1512.63	2960.36	64.8913	-5.50254	0	0	down
LOC_Os07g18750	1712.81	409.799	3015.83	2.88383	0	0	up
LOC_Os07g22930	4950.41	8909.81	991.006	-3.16828	0	0	down
LOC_Os07g23660	2253.77	33.7208	4473.81	7.06073	0	0	up
LOC_Os07g23990	5637.17	11040.9	233.457	-5.56066	0	0	down
LOC_Os07g26110	2756.21	23.12	5489.3	7.90053	0	0	up
LOC_Os07g26630	2737.5	52.6716	5422.32	6.67489	0	0	up
LOC_Os07g28480	1400.78	2678.9	122.664	-4.44776	0	0	down
LOC_Os07g28790	729.982	1357.98	101.989	-3.73508	0	0	down
LOC_Os07g29220	1100.39	2004.93	195.858	-3.35435	0	0	down
LOC_Os07g30200	2550.12	4436.82	663.424	-2.74001	0	0	down
LOC_Os07g30800	883.888	1598.97	168.805	-3.24194	0	0	down
LOC_Os07g31884	2809.24	5160.75	457.738	-3.49479	0	0	down
LOC_Os07g32560	907.438	1753.12	61.7596	-4.83634	0	0	down
LOC_Os07g32880	9268.93	18343.9	193.96	-6.564	0	0	down
LOC_Os07g33350	889.352	1568.01	210.695	-2.89609	0	0	down
LOC_Os07g33660	1937.34	3849.89	24.7929	-7.27701	0	0	down
LOC_Os07g35510	875.991	106.045	1645.94	3.9546	0	0	up
LOC_Os07g35560	2882.22	428.137	5336.3	3.63448	0	0	up
LOC_Os07g36190	3756.17	6429.65	1082.69	-2.5705	0	0	down
LOC_Os07g37030	8543.26	17073.4	13.1108	-10.3438	0	0	down
LOC_Os07g37230	1028.21	2021.8	34.6235	-5.86229	0	0	down
LOC_Os07g37250	6085.67	11701.5	469.835	-4.64069	0	0	down
LOC_Os07g37830	1741.58	3289.91	193.264	-4.09085	0	0	down
LOC_Os07g38300	3154.17	6081.95	226.392	-4.74383	0	0	down
LOC_Os07g43330	1649.19	2877.47	420.908	-2.77227	0	0	down
LOC_Os07g43810	2920.72	5750.1	91.3389	-5.97648	0	0	down
LOC_Os07g44060	5709.72	1177.37	10242.1	3.12347	0	0	up
LOC_Os07g44330	9895.57	17909.1	1882	-3.25092	0	0	down
LOC_Os07g44440	1709.32	255.97	3162.68	3.62665	0	0	up
LOC_Os07g46330	2481.76	4949.72	13.7994	-8.4939	0	0	down
LOC_Os07g46340	3983.71	6987.4	980.028	-2.83352	0	0	down
LOC_Os07g46410	3552.41	6578.83	525.988	-3.64415	0	0	down
LOC_Os07g46460	58617.5	112500	4735.52	-4.57033	0	0	down
LOC_Os07g46520	3007.65	5028.2	987.099	-2.34864	0	0	down
LOC_Os07g46670	2126.88	611.177	3642.57	2.57649	0	0	up
LOC_Os07g46780	1366.26	2700.07	32.4537	-6.36788	0	0	down
LOC_Os07g46790	6602.21	10967	2237.39	-2.29298	0	0	down
LOC_Os07g47300	1087.29	2103.43	71.1431	-4.88062	0	0	down
LOC_Os07g48060	1008.45	86.1537	1930.75	4.50186	0	0	up
LOC_Os07g48460	1794.7	176.964	3412.44	4.26916	0	0	up
LOC_Os07g48500	8832.82	17184.4	481.272	-5.15965	0	0	down
LOC_Os07g49110	9634.46	18534.8	734.151	-4.65823	0	0	down
LOC_Os07g49310	3851.03	7659	43.056	-7.47963	0	0	down
LOC_Os08g01140	1882.47	3735.96	28.9774	-7.02746	0	0	down
LOC_Os08g01760	2386.9	849.594	3924.21	2.20694	0	0	up
LOC_Os08g01770	3210.65	5607.2	814.1	-2.78435	0	0	down
LOC_Os08g01780	1349.62	2394.06	305.178	-2.97406	0	0	down
LOC_Os08g02120	5832.94	2372.09	9293.78	1.97079	0	0	up
LOC_Os08g02490	2573.1	1070.64	4075.56	1.92726	0	0	up
LOC_Os08g03350	7623.93	1787.94	13459.9	2.9125	0	0	up
LOC_Os08g04840	5473.87	9708.95	1238.79	-2.97041	0	0	down
LOC_Os08g05620	2319.03	4572.22	65.8382	-6.11486	0	0	down
LOC_Os08g06100	24895.2	12733.3	37057	1.54118	0	0	up
LOC_Os08g06110	26380.4	40486.5	12274.3	-1.72168	0	0	down
LOC_Os08g06230	1154.63	1971.6	337.657	-2.54688	0	0	down
LOC_Os08g06280	2142.67	3365.04	920.297	-1.87032	0	0	down
LOC_Os08g06530	2730.32	5448.54	12.0944	-8.83038	0	0	down
LOC_Os08g06630	1305.76	2537.98	73.5418	-5.10897	0	0	down
LOC_Os08g07010	1839.13	331.363	3346.9	3.33779	0	0	up
LOC_Os08g07540	1490.36	2814.86	165.866	-4.08253	0	0	down
LOC_Os08g07774	2851.22	5150.35	552.09	-3.22037	0	0	down
LOC_Os08g07970	3027.27	829.544	5225	2.65209	0	0	up
LOC_Os08g08970	1974.96	198.059	3751.85	4.23937	0	0	up
LOC_Os08g09200	8726.27	4746.99	12705.6	1.42033	0	0	up
LOC_Os08g10020	31731.7	63444.5	18.937	-11.7074	0	0	down
LOC_Os08g10250	1210.6	2283.62	137.575	-4.05205	0	0	down
LOC_Os08g10320	5996.08	8770.22	3221.94	-1.44438	0	0	down
LOC_Os08g10330	1285.89	47.3951	2524.38	5.74443	0	0	up
LOC_Os08g12780	966.444	1884.49	48.3946	-5.2823	0	0	down
LOC_Os08g13930	4230.46	6604.27	1856.64	-1.83034	0	0	down
LOC_Os08g14440	6435.28	12343.1	527.43	-4.54889	0	0	down
LOC_Os08g15460	1459.52	2613.18	305.853	-3.09182	0	0	down
LOC_Os08g16570	2317.63	4444.65	190.611	-4.54363	0	0	down
LOC_Os08g16830	718.386	1363.16	73.6104	-4.21151	0	0	down
LOC_Os08g17390	5538.59	11051.9	25.2484	-8.78202	0	0	down
LOC_Os08g19140	1456.41	2853.76	59.0621	-5.5899	0	0	down
LOC_Os08g19610	894.506	1628.41	160.605	-3.34348	0	0	down
LOC_Os08g21879	780.81	1422.05	139.57	-3.34904	0	0	down
LOC_Os08g24200	1073.97	39.9514	2107.98	5.70998	0	0	up
LOC_Os08g24390	1233.42	2379.48	87.3671	-4.76916	0	0	down
LOC_Os08g25700	896.967	1636.25	157.682	-3.37596	0	0	down
LOC_Os08g25734	5049.1	9335.14	763.069	-3.61365	0	0	down
LOC_Os08g27840	9609.2	17626.3	1592.07	-3.46909	0	0	down
LOC_Os08g29370	1520.63	3013.06	28.2053	-6.74816	0	0	down
LOC_Os08g30740	2223.76	582.051	3865.46	2.72915	0	0	up
LOC_Os08g30770	1876.69	78.3858	3675	5.56529	0	0	up
LOC_Os08g31510	2917.6	5239.05	596.139	-3.13613	0	0	down
LOC_Os08g31910	1771.06	3425.66	116.465	-4.87924	0	0	down
LOC_Os08g32630	1963.9	3866.23	61.5701	-5.97213	0	0	down
LOC_Os08g34210	12634.6	22691.3	2577.92	-3.13734	0	0	down
LOC_Os08g34220	2364.59	4529.65	199.527	-4.5024	0	0	down
LOC_Os08g34280	4000.29	1374	6626.57	2.26951	0	0	up
LOC_Os08g35620	2518.44	4010.47	1026.42	-1.9664	0	0	down
LOC_Os08g36040	1064.18	205.382	1922.97	3.23357	0	0	up
LOC_Os08g36310	860.906	1593.6	128.21	-3.63734	0	0	down
LOC_Os08g36480	3217.02	5627.02	807.013	-2.80283	0	0	down
LOC_Os08g37250	1196.98	78.3267	2315.64	4.8859	0	0	up
LOC_Os08g37300	2576.07	295.073	4857.06	4.05167	0	0	up
LOC_Os08g37432	2065.25	3749.48	381.017	-3.29646	0	0	down
LOC_Os08g37610	4192.12	6785.52	1598.72	-2.08521	0	0	down
LOC_Os08g37790	4146.05	6370.58	1921.53	-1.72923	0	0	down
LOC_Os08g38910	1217.38	2134.43	300.321	-2.82998	0	0	down
LOC_Os08g38990	1322.93	2437.97	207.884	-3.55324	0	0	down
LOC_Os08g39140	6264.54	2016.87	10512.2	2.38022	0	0	up
LOC_Os08g39300	38049.7	75761.3	337.998	-7.81106	0	0	down
LOC_Os08g40919	1279.06	2281.71	276.406	-3.04551	0	0	down
LOC_Os08g41040	2237.89	4439.93	35.8496	-6.95055	0	0	down
LOC_Os08g41460	5030.64	9555.54	505.742	-4.23927	0	0	down
LOC_Os08g41990	5420.31	9663.42	1177.19	-3.03728	0	0	down
LOC_Os08g43390	904.358	1711.43	97.2876	-4.13562	0	0	down
LOC_Os08g43400	2490.75	4239.86	741.644	-2.51635	0	0	down
LOC_Os08g43560	8184.54	13902.5	2466.59	-2.49543	0	0	down
LOC_Os08g44000	2585.92	5075.85	95.9841	-5.72733	0	0	down
LOC_Os08g44290	4626.02	8939.97	312.067	-4.84076	0	0	down
LOC_Os08g44360	2672.95	127.897	5218	5.35694	0	0	up
LOC_Os08g44400	1566.07	2918.74	213.388	-3.773	0	0	down
LOC_Os08g44640	1700.68	3239.89	161.469	-4.32652	0	0	down
LOC_Os08g44680	4952.77	9891.85	13.6904	-9.49346	0	0	down
LOC_Os08g44770	3336.68	5525.88	1147.48	-2.26728	0	0	down
LOC_Os08g44810	4609.58	8983.85	235.309	-5.25447	0	0	down
LOC_Os08g45180	1404.37	2652	156.74	-4.0808	0	0	down
LOC_Os09g02214	2210.48	3813.63	607.34	-2.65081	0	0	down
LOC_Os09g02710	1782.41	2992.77	572.044	-2.38593	0	0	down
LOC_Os09g03630	956.178	1705.05	207.301	-3.03879	0	0	down
LOC_Os09g04050	2240.13	432.481	4047.77	3.22355	0	0	up
LOC_Os09g04440	3529.97	5686.3	1373.63	-2.04965	0	0	down
LOC_Os09g04880	1500.39	2601.55	399.227	-2.70302	0	0	down
LOC_Os09g06499	2264.47	3742.79	786.156	-2.25102	0	0	down
LOC_Os09g07460	2237.24	313.88	4160.6	3.73217	0	0	up
LOC_Os09g07570	2840.98	5292.26	389.704	-3.76223	0	0	down
LOC_Os09g07660	929.122	1693.8	164.44	-3.36356	0	0	down
LOC_Os09g09320	1018.49	2004.71	32.2701	-5.96362	0	0	down
LOC_Os09g10760	2543.25	4971.94	114.552	-5.43767	0	0	down
LOC_Os09g10840	1152.87	166.929	2138.82	3.6886	0	0	up
LOC_Os09g12240	948.286	51.1102	1845.46	5.18164	0	0	up
LOC_Os09g12290	2591.7	4211.77	971.627	-2.11514	0	0	down
LOC_Os09g17049	6679.12	9663.46	3694.78	-1.38653	0	0	down
LOC_Os09g20240	4194.18	7077.63	1310.74	-2.43361	0	0	down
LOC_Os09g21180	2071.43	650.219	3492.65	2.42855	0	0	up
LOC_Os09g23550	969.256	1891.04	47.4725	-5.31263	0	0	down
LOC_Os09g24530	1404.2	2787.8	20.6082	-7.0725	0	0	down
LOC_Os09g25580	1740.14	2937.87	542.414	-2.43723	0	0	down
LOC_Os09g26190	1352.33	2555.46	149.201	-4.09566	0	0	down
LOC_Os09g26570	1671.93	2739.69	604.178	-2.17984	0	0	down
LOC_Os09g26620	6783.26	2888.59	10677.9	1.8858	0	0	up
LOC_Os09g27500	930.926	76.3908	1785.46	4.55257	0	0	up
LOC_Os09g27750	2499.96	4480.26	519.659	-3.10705	0	0	down
LOC_Os09g29660	1489.2	294.688	2683.71	3.18539	0	0	up
LOC_Os09g31080	5074.2	935.001	9213.39	3.2991	0	0	up
LOC_Os09g31130	1698.58	2906.12	491.04	-2.56504	0	0	down
LOC_Os09g31300	2661.85	4535.53	788.168	-2.52574	0	0	down
LOC_Os09g31514	2213.06	4300.93	125.183	-5.10458	0	0	down
LOC_Os09g32030	819.866	1500.74	138.993	-3.43207	0	0	down
LOC_Os09g32240	2685.63	4661.98	709.284	-2.71593	0	0	down
LOC_Os09g33830	1729.05	255.142	3202.95	3.64794	0	0	up
LOC_Os09g35760	830.591	1550.82	110.363	-3.81377	0	0	down
LOC_Os09g36130	1620.77	3079.16	162.373	-4.24376	0	0	down
LOC_Os09g36240	1268.02	2268.61	267.42	-3.08428	0	0	down
LOC_Os09g36450	10769	17519.6	4018.44	-2.12417	0	0	down
LOC_Os09g37710	1728.4	618.013	2838.79	2.20166	0	0	up
LOC_Os09g38130	942.716	1742.68	142.755	-3.60769	0	0	down
LOC_Os09g38410	1745.57	3141.89	349.247	-3.16821	0	0	down
LOC_Os09g38420	1232.74	2160.6	304.887	-2.82391	0	0	down
LOC_Os09g38960	3182.18	5336.51	1027.84	-2.3765	0	0	down
LOC_Os09g39180	5074.41	9769.09	379.728	-4.6867	0	0	down
LOC_Os09g39390	7160	14019.3	300.664	-5.5432	0	0	down
LOC_Os09g39410	1293.12	315.372	2270.87	2.8392	0	0	up
LOC_Os09g39560	2149.52	3394.88	904.155	-1.90938	0	0	down
LOC_Os09g39650	1554.59	148.872	2960.3	4.31502	0	0	up
LOC_Os09g39680	4444.46	8166.57	722.358	-3.50035	0	0	down
LOC_Os10g01134	1177.69	2072.84	282.545	-2.87587	0	0	down
LOC_Os10g02070	5385.47	1537.8	9233.14	2.58805	0	0	up
LOC_Os10g02240	948.074	1787.28	108.863	-4.03704	0	0	down
LOC_Os10g02480	2275.86	4414.61	137.101	-5.0117	0	0	down
LOC_Os10g07450	875.011	1628.59	121.428	-3.74464	0	0	down
LOC_Os10g07556	1185.86	67.2224	2304.5	5.09598	0	0	up
LOC_Os10g08550	24293.7	14396.1	34191.2	1.2482	0	0	up
LOC_Os10g10170	4380.31	8722.63	37.9848	-7.83402	0	0	down
LOC_Os10g11140	2975.45	5805.74	145.166	-5.31708	0	0	down
LOC_Os10g12354	1314.37	2309.67	319.079	-2.85736	0	0	down
LOC_Os10g18370	6794.02	13530.9	57.1789	-7.88618	0	0	down
LOC_Os10g22560	2235.45	4220.48	250.429	-4.07461	0	0	down
LOC_Os10g25150	3430.05	668.079	6192.02	3.21259	0	0	up
LOC_Os10g25570	1389.7	2610.92	168.477	-3.94921	0	0	down
LOC_Os10g25780	3962.49	1614.26	6310.73	1.96671	0	0	up
LOC_Os10g28200	13769.7	22007.4	5531.93	-1.99198	0	0	down
LOC_Os10g28360	2165.21	3927.01	403.421	-3.28244	0	0	down
LOC_Os10g30450	3044.04	678.009	5410.08	2.99489	0	0	up
LOC_Os10g30790	2700.29	977.792	4422.79	2.17719	0	0	up
LOC_Os10g31040	2133.53	3476.6	790.458	-2.13717	0	0	down
LOC_Os10g31780	1662.42	187.679	3137.16	4.05057	0	0	up
LOC_Os10g32300	878.231	1713.57	42.8957	-5.32073	0	0	down
LOC_Os10g32540	1859.21	3062.43	655.982	-2.22364	0	0	down
LOC_Os10g33170	783.867	1446.26	121.477	-3.57134	0	0	down
LOC_Os10g33420	4687.84	7103.28	2272.41	-1.64464	0	0	down
LOC_Os10g33440	1354.89	246.579	2463.21	3.32231	0	0	up
LOC_Os10g33960	1898.57	3100.57	696.558	-2.15366	0	0	down
LOC_Os10g34400	5059.88	8077.05	2042.71	-1.98295	0	0	down
LOC_Os10g35010	4196.89	7000.47	1393.31	-2.3285	0	0	down
LOC_Os10g35030	11804	23528.5	79.5635	-8.20593	0	0	down
LOC_Os10g35810	1152.81	2282.51	23.1001	-6.62838	0	0	down
LOC_Os10g35840	2894.87	4870.58	919.152	-2.40601	0	0	down
LOC_Os10g35940	1094.67	2085.05	104.296	-4.31456	0	0	down
LOC_Os10g36170	862.567	1682.7	42.4345	-5.31099	0	0	down
LOC_Os10g36260	2513.69	4715.03	312.354	-3.91571	0	0	down
LOC_Os10g36530	894.449	1699.19	89.7053	-4.24522	0	0	down
LOC_Os10g36690	1818.23	641.037	2995.42	2.22123	0	0	up
LOC_Os10g38040	2760.96	964.001	4557.92	2.24225	0	0	up
LOC_Os10g38090	1637.41	24.297	3250.53	7.05375	0	0	up
LOC_Os10g38110	4569.42	9039.5	99.3424	-6.5122	0	0	down
LOC_Os10g38140	995.662	1948.61	42.7151	-5.51416	0	0	down
LOC_Os10g38700	1992.16	3839.25	145.075	-4.72562	0	0	down
LOC_Os10g39520	1018.52	1803.02	234.012	-2.94459	0	0	down
LOC_Os10g39680	1327.79	237.078	2418.49	3.35697	0	0	up
LOC_Os10g39930	973.61	1890.73	56.4915	-5.06186	0	0	down
LOC_Os10g40030	1187.97	2074.56	301.373	-2.78205	0	0	down
LOC_Os10g40700	1232.68	222.583	2242.78	3.33472	0	0	up
LOC_Os10g40710	1545.08	81.0831	3009.08	5.20983	0	0	up
LOC_Os10g40720	3878.44	6107.15	1649.72	-1.88825	0	0	down
LOC_Os10g41200	3640.89	5873.36	1408.42	-2.06036	0	0	down
LOC_Os10g41400	3692.41	5810.03	1574.78	-1.88406	0	0	down
LOC_Os10g41550	7026.98	12862.1	1191.9	-3.43249	0	0	down
LOC_Os10g41780	4393.34	8329.97	456.716	-4.18884	0	0	down
LOC_Os10g41980	2765.68	974.371	4557	2.22964	0	0	up
LOC_Os10g41999	1497.98	386.496	2609.46	2.75698	0	0	up
LOC_Os10g42230	1512.42	231.05	2793.78	3.60234	0	0	up
LOC_Os10g42240	2066.27	4009.2	123.343	-5.03028	0	0	down
LOC_Os10g42299	8210.04	15009.9	1410.22	-3.41225	0	0	down
LOC_Os10g42700	1074.69	1901.24	248.141	-2.93941	0	0	down
LOC_Os10g42780	6708.57	13393.8	23.3238	-9.16351	0	0	down
LOC_Os11g01439	7976.59	15916.1	37.0507	-8.74629	0	0	down
LOC_Os11g02080	1192.02	283.032	2101	2.89023	0	0	up
LOC_Os11g04020	3061.49	787.11	5335.87	2.76247	0	0	up
LOC_Os11g05260	949.629	1859.31	39.9467	-5.54977	0	0	down
LOC_Os11g05390	1963.07	666.148	3259.99	2.29379	0	0	up
LOC_Os11g05480	1721.31	58.2922	3384.33	5.85795	0	0	up
LOC_Os11g05552	1223.02	2314.13	131.91	-4.13239	0	0	down
LOC_Os11g05556	2629.87	5077.49	182.26	-4.79693	0	0	down
LOC_Os11g05700	8280.43	12606.9	3953.99	-1.67283	0	0	down
LOC_Os11g05990	4082.66	7245.16	920.162	-2.97642	0	0	down
LOC_Os11g06020	3476.68	5886.04	1067.32	-2.46368	0	0	down
LOC_Os11g06390	9809.9	14570.9	5048.87	-1.52886	0	0	down
LOC_Os11g07020	92991.8	185966	17.3398	-13.3984	0	0	down
LOC_Os11g07830	1226.76	307.306	2146.2	2.8105	0	0	up
LOC_Os11g08670	4200.79	7440.05	961.521	-2.95138	0	0	down
LOC_Os11g09280	8455.11	3105.26	13805	2.15225	0	0	up
LOC_Os11g09680	1049.03	2072.61	25.4438	-6.35097	0	0	down
LOC_Os11g10480	4328	6565.84	2090.16	-1.65173	0	0	down
LOC_Os11g10510	7983.29	443.408	15523.2	5.12468	0	0	up
LOC_Os11g10990	1196.47	2371.1	21.8387	-6.75968	0	0	down
LOC_Os11g11000	7126.71	13364.1	889.292	-3.90806	0	0	down
LOC_Os11g11210	798.614	1554.12	43.1046	-5.17771	0	0	down
LOC_Os11g12810	2738.71	5245.71	231.708	-4.50165	0	0	down
LOC_Os11g13420	1088.24	1977.11	199.374	-3.30743	0	0	down
LOC_Os11g13850	2806.66	5544.41	68.9154	-6.32589	0	0	down
LOC_Os11g13890	1089.71	2044.93	134.503	-3.92627	0	0	down
LOC_Os11g14050	1634.38	201.961	3066.8	3.92323	0	0	up
LOC_Os11g14220	27677.9	13620.7	41735.1	1.61585	0	0	up
LOC_Os11g14544	15477.7	23399	7556.47	-1.6306	0	0	down
LOC_Os11g15040	1286.89	2380.4	193.382	-3.62383	0	0	down
LOC_Os11g15624	6724.92	11109.1	2340.74	-2.24659	0	0	down
LOC_Os11g16310	1217.64	2281.1	154.175	-3.88379	0	0	down
LOC_Os11g16550	1554.37	2964.91	143.831	-4.36787	0	0	down
LOC_Os11g17290	8745.81	14641.1	2850.52	-2.36071	0	0	down
LOC_Os11g22350	2034.44	4030.47	38.4035	-6.71898	0	0	down
LOC_Os11g23790	3245.18	6309.86	180.499	-5.12873	0	0	down
LOC_Os11g24450	2941.6	5869.65	13.5543	-8.74072	0	0	down
LOC_Os11g25780	929.802	1681.83	177.773	-3.24091	0	0	down
LOC_Os11g26160	1182.76	2184.05	181.46	-3.58601	0	0	down
LOC_Os11g26790	6725.14	10606	2844.31	-1.89952	0	0	down
LOC_Os11g26850	24550	13519.8	35580.3	1.39619	0	0	up
LOC_Os11g26890	3005.54	5533.53	477.546	-3.53366	0	0	down
LOC_Os11g31090	1266.72	200.238	2333.21	3.54184	0	0	up
LOC_Os11g31190	1493.35	414.666	2572.03	2.63648	0	0	up
LOC_Os11g31900	2297.71	4370.44	224.97	-4.27965	0	0	down
LOC_Os11g32320	1732.39	2989.17	475.607	-2.65298	0	0	down
LOC_Os11g32500	1593.87	3077.79	109.95	-4.81518	0	0	down
LOC_Os11g32650	4158.85	8280.47	37.234	-7.79174	0	0	down
LOC_Os11g32880	851.692	1607.03	96.3574	-4.06012	0	0	down
LOC_Os11g34210	1504.86	2621.19	388.534	-2.75333	0	0	down
LOC_Os11g34940	869.536	1666.91	72.159	-4.5315	0	0	down
LOC_Os11g36440	2039.87	3286.92	792.807	-2.0504	0	0	down
LOC_Os11g37130	1647.49	2834.42	460.55	-2.62326	0	0	down
LOC_Os11g37560	1277.69	2220.69	334.69	-2.72988	0	0	down
LOC_Os11g37700	2194.22	87.5123	4300.94	5.61591	0	0	up
LOC_Os11g37960	994.578	180.209	1808.95	3.32211	0	0	up
LOC_Os11g37990	2044.34	3800.38	288.307	-3.71898	0	0	down
LOC_Os11g38020	1115.68	2027.15	204.209	-3.31183	0	0	down
LOC_Os11g38030	1317.83	2290.06	345.603	-2.72753	0	0	down
LOC_Os11g39020	15143.6	29304.9	982.286	-4.89728	0	0	down
LOC_Os11g41910	2362.8	4363.54	362.064	-3.5895	0	0	down
LOC_Os11g41990	7441.33	10965	3917.68	-1.48512	0	0	down
LOC_Os11g42490	1769.4	3501.96	36.8323	-6.56251	0	0	down
LOC_Os11g42510	1659.73	3194.21	125.251	-4.67815	0	0	down
LOC_Os11g42960	2012.08	66.9276	3957.23	5.89163	0	0	up
LOC_Os11g43600	1087.72	2013.24	162.2	-3.62811	0	0	down
LOC_Os11g45280	2141.81	3555.63	728.001	-2.2877	0	0	down
LOC_Os11g47460	3353.38	1065.1	5641.66	2.40585	0	0	up
LOC_Os11g47809	48713.1	14661.1	82765.2	2.49657	0	0	up
LOC_Os11g47970	140916	281828	3.25206	-16.4215	0	0	down
LOC_Os12g01140	1234.52	2376.45	92.5786	-4.67884	0	0	down
LOC_Os12g02250	3122.98	5516.14	729.819	-2.91858	0	0	down
LOC_Os12g02980	1518.87	3006.03	31.7108	-6.56209	0	0	down
LOC_Os12g03200	1495.36	2827.26	163.454	-4.11526	0	0	down
LOC_Os12g06490	5154.98	1244.42	9065.54	2.86451	0	0	up
LOC_Os12g07020	2077.33	3660.05	494.617	-2.88648	0	0	down
LOC_Os12g07110	3646.21	7231.35	61.0725	-6.88925	0	0	down
LOC_Os12g07150	1981.06	549.273	3412.85	2.63469	0	0	up
LOC_Os12g07190	1875.38	3174.42	576.344	-2.46066	0	0	down
LOC_Os12g07280	1273.63	332.96	2214.3	2.73267	0	0	up
LOC_Os12g07370	1374.5	2632.6	116.397	-4.50058	0	0	down
LOC_Os12g08220	1042.53	1912.5	172.561	-3.46979	0	0	down
LOC_Os12g08260	5076.05	8623.5	1528.59	-2.4968	0	0	down
LOC_Os12g08730	10475.7	20852.4	99.0391	-7.72294	0	0	down
LOC_Os12g08760	5761.17	10119.1	1403.28	-2.84965	0	0	down
LOC_Os12g08810	29131.8	54652.8	3610.78	-3.91969	0	0	down
LOC_Os12g08830	2090.27	4146.05	34.4968	-6.89934	0	0	down
LOC_Os12g12580	1551.04	3077.64	24.4398	-6.97237	0	0	down
LOC_Os12g12850	8290.31	15631	949.61	-4.04193	0	0	down
LOC_Os12g13120	1025.21	2023.2	27.2241	-6.21899	0	0	down
LOC_Os12g13340	88154.3	157884	18424.4	-3.09907	0	0	down
LOC_Os12g13350	3534.52	6418.81	650.233	-3.30325	0	0	down
LOC_Os12g13380	2419.44	654.917	4183.97	2.67689	0	0	up
LOC_Os12g13460	1484.19	2443.49	524.892	-2.21754	0	0	down
LOC_Os12g14070	5614.96	8777.59	2452.33	-1.8393	0	0	down
LOC_Os12g16220	1982.64	3531.81	433.481	-3.02804	0	0	down
LOC_Os12g17910	7249.88	13768.5	731.281	-4.23533	0	0	down
LOC_Os12g18630	3568.32	5775.08	1361.56	-2.08452	0	0	down
LOC_Os12g18729	9760.15	15293.9	4226.36	-1.85554	0	0	down
LOC_Os12g19304	3064.12	5355.05	773.197	-2.79226	0	0	down
LOC_Os12g19470	50840	101674	5.65772	-14.162	0	0	down
LOC_Os12g19530	2509.99	4819.49	200.483	-4.58331	0	0	down
LOC_Os12g25690	3941.14	1390.17	6492.12	2.22454	0	0	up
LOC_Os12g29220	3023.66	5263.53	783.792	-2.7471	0	0	down
LOC_Os12g32760	5048.15	9690.72	405.57	-4.57997	0	0	down
LOC_Os12g34860	1647.82	2822.67	472.967	-2.57577	0	0	down
LOC_Os12g34890	1793.89	3354.89	232.894	-3.84502	0	0	down
LOC_Os12g35630	7321.17	14506.9	135.462	-6.74592	0	0	down
LOC_Os12g36830	1768.64	97.3918	3439.88	5.12636	0	0	up
LOC_Os12g37519	1176.9	242.504	2111.31	3.12266	0	0	up
LOC_Os12g37530	2725.61	4719.85	731.377	-2.68996	0	0	down
LOC_Os12g37650	2255.81	4497.26	14.3546	-8.29651	0	0	down
LOC_Os12g37840	3914.02	1499.04	6329.01	2.07853	0	0	up
LOC_Os12g37970	2776.37	1133.09	4419.65	1.96353	0	0	up
LOC_Os12g38051	8820.84	77.3586	17564.3	7.85015	0	0	up
LOC_Os12g38300	16515.5	38.5218	32992.4	9.73293	0	0	up
LOC_Os12g38640	3357.57	6671.65	43.494	-7.26153	0	0	down
LOC_Os12g38730	1749.59	3231.41	267.768	-3.59291	0	0	down
LOC_Os12g39370	2083.05	3710.1	456.009	-3.02351	0	0	down
LOC_Os12g41124	889.15	1658.2	120.098	-3.78828	0	0	down
LOC_Os12g41430	1419.1	2381.25	456.947	-2.37986	0	0	down
LOC_Os12g41690	968.951	86.7364	1851.16	4.42885	0	0	up
LOC_Os12g42090	6632.53	11916.8	1348.29	-3.14459	0	0	down
LOC_Os12g42200	8080.52	20.8916	16140.1	9.58061	0	0	up
LOC_Os12g42300	3100.76	5913.35	288.171	-4.36061	0	0	down
LOC_Os12g42876	31246.3	18098.8	44393.8	1.29433	0	0	up
LOC_Os12g43130	5165.64	10187.7	143.571	-6.14842	0	0	down
LOC_Os12g43510	1302.72	97.8551	2507.59	4.68834	0	0	up
LOC_Os12g43720	1019.54	1827.88	211.201	-3.11182	0	0	down
LOC_Os12g44310	5790.17	9269.24	2311.09	-2.00369	0	0	down
LOC_Os12g44370	1673.66	3038.5	308.814	-3.29699	0	0	down
novel.1038	801.9	1529.09	74.7103	-4.35323	0	0	down
novel.133	1366.09	36.0395	2696.14	6.20681	0	0	up
novel.202	899.714	81.0689	1718.36	4.41379	0	0	up
novel.388	2429.07	4672.33	185.802	-4.65105	0	0	down
novel.449	3005.22	5808.13	202.304	-4.84207	0	0	down
novel.455	8661.49	14412.6	2910.43	-2.30772	0	0	down
novel.533	1685.87	2756.55	615.184	-2.16266	0	0	down
novel.587	2641.35	4108.6	1174.09	-1.80632	0	0	down
novel.591	1996.18	3443.5	548.851	-2.65017	0	0	down
novel.707	1315.48	2609.46	21.503	-6.93574	0	0	down
novel.80	7052.15	11328.3	2775.96	-2.02848	0	0	down
novel.898	4716.86	9251.99	181.73	-5.671	0	0	down
novel.906	49758.2	99503.8	12.6269	-12.9526	0	0	down
novel.917	6902.31	2529.72	11274.9	2.15717	0	0	up
novel.961	1236.45	2335.81	137.094	-4.09212	0	0	down
LOC_Os12g13720	1470.58	486.573	2454.59	2.33325	7.49167e-308	1.40466e-306	up
LOC_Os10g36550	5714.26	3127.18	8301.34	1.40934	3.20639e-307	6.0073e-306	up
LOC_Os02g40040	1249.29	2112.21	386.372	-2.45085	6.11117e-307	1.14409e-305	down
LOC_Os01g61380	1165.43	309.285	2021.58	2.70625	9.07544e-307	1.69775e-305	up
LOC_Os02g37060	3774.26	7538.33	10.197	-9.52687	2.17188e-306	4.05987e-305	down
LOC_Os08g35160	848.322	1508.7	187.945	-3.00282	2.75801e-306	5.15162e-305	down
LOC_Os09g12540	786.918	1538	35.8363	-5.41968	6.29538e-306	1.17501e-304	down
LOC_Os12g01570	687.861	1314.76	60.9608	-4.42866	1.13452e-305	2.11595e-304	down
LOC_Os05g47850	1318.3	2184.91	451.691	-2.27319	1.17971e-305	2.19857e-304	down
LOC_Os04g37820	1240.43	2139.11	341.759	-2.64482	1.80858e-305	3.36802e-304	down
LOC_Os08g34650	820.571	76.8513	1564.29	4.34155	2.19597e-305	4.08636e-304	up
LOC_Os11g44680	917.047	180.877	1653.22	3.19082	5.0754e-305	9.43742e-304	up
LOC_Os03g61780	1037.32	260.497	1814.13	2.80131	6.83992e-305	1.27089e-303	up
LOC_Os12g03860	838.454	1646.19	30.7205	-5.73275	7.08126e-305	1.31474e-303	down
LOC_Os12g33150	821.494	1600.99	41.9992	-5.261	1.33843e-304	2.48312e-303	down
LOC_Os02g08260	1036.89	1776.71	297.064	-2.57975	1.54434e-304	2.863e-303	down
LOC_Os12g09570	2130.6	3385.82	875.375	-1.95156	1.81624e-304	3.36454e-303	down
LOC_Os06g22394	921.467	1814.4	28.5356	-5.98876	3.16937e-304	5.86677e-303	down
LOC_Os01g74010	1055.3	1804.52	306.08	-2.55893	9.87427e-304	1.82644e-302	down
LOC_Os03g53230	7686.24	3824.93	11547.6	1.59277	1.00953e-303	1.86593e-302	up
LOC_Os12g36060	767.148	1399	135.3	-3.37044	7.50214e-303	1.3856e-301	down
LOC_Os06g29730	1255.58	335.099	2176.05	2.69551	8.3529e-303	1.54158e-301	up
LOC_Os11g25160	729.804	1368.64	90.9709	-3.90803	4.2149e-302	7.77303e-301	down
LOC_Os07g10540	1527.16	2473.47	580.848	-2.09069	6.09793e-302	1.12373e-300	down
LOC_Os03g39830	1884.65	3756.16	13.1363	-8.15955	8.89259e-302	1.63751e-300	down
LOC_Os01g47630	1435.54	2855.38	15.7037	-7.50115	1.29193e-301	2.37723e-300	down
LOC_Os04g39020	2740.93	1217.49	4264.36	1.81041	1.30972e-301	2.40818e-300	up
LOC_Os01g11590	1022.41	1767.74	277.079	-2.67418	2.68869e-301	4.94e-300	down
LOC_Os02g17360	863.998	1543.77	184.226	-3.06445	5.24824e-301	9.63556e-300	down
LOC_Os07g48630	3403.74	5310.55	1496.93	-1.82655	5.82774e-301	1.06915e-299	down
LOC_Os03g40270	8965.07	5054.38	12875.8	1.35004	6.65296e-301	1.21964e-299	up
LOC_Os03g57200	813.767	115.524	1512.01	3.70173	7.41659e-301	1.35863e-299	up
LOC_Os08g04450	802.6	1465.26	139.937	-3.3892	8.10513e-301	1.48366e-299	down
LOC_Os03g52460	4399.03	8789.57	8.49474	-10.0199	1.1618e-300	2.12513e-299	down
LOC_Os02g46920	3509.22	5418.55	1599.9	-1.75857	1.54136e-300	2.81731e-299	down
LOC_Os03g21960	820.834	72.552	1569.12	4.42621	1.83427e-300	3.35022e-299	up
LOC_Os01g55510	867.175	49.5996	1684.75	5.08352	2.01479e-300	3.67722e-299	up
LOC_Os04g38914	728.408	1386.08	70.7385	-4.29423	2.1546e-300	3.92948e-299	down
LOC_Os06g05110	1309.72	2172.02	447.422	-2.27774	5.05645e-300	9.21496e-299	down
LOC_Os01g73250	8065.25	11758.9	4371.57	-1.4272	9.20407e-300	1.67613e-298	down
LOC_Os02g03250	744.109	1369.78	118.437	-3.53284	1.38425e-299	2.51898e-298	down
LOC_Os03g01570	1366.89	2262.3	471.469	-2.26105	1.6056e-299	2.91961e-298	down
LOC_Os06g39690	746.841	1459.91	33.7755	-5.43034	1.6194e-299	2.94255e-298	down
LOC_Os03g62200	794.402	75.3166	1513.49	4.34179	1.82386e-299	3.31163e-298	up
LOC_Os05g34854	710.366	1345.23	75.5069	-4.1531	2.26747e-299	4.11408e-298	down
LOC_Os11g47370	2921.69	4516.14	1327.25	-1.76587	2.51856e-299	4.56631e-298	down
LOC_Os01g22640	772.231	1406.73	137.729	-3.35539	7.70726e-299	1.39635e-297	down
LOC_Os02g35620	1209.7	2165.08	254.325	-3.09183	1.11563e-298	2.01973e-297	down
LOC_Os06g36090	8075.44	11350.1	4800.75	-1.2415	3.00848e-298	5.44258e-297	down
LOC_Os07g23640	5181.86	292.849	10070.9	5.10608	3.83861e-298	6.93927e-297	up
LOC_Os01g32830	1813.13	3613.16	13.1081	-8.10337	8.80222e-298	1.59006e-296	down
LOC_Os08g34984	2950.02	5779.76	120.282	-5.59053	1.24519e-297	2.24772e-296	down
LOC_Os03g51240	960.989	210.101	1711.88	3.02226	3.89049e-297	7.01765e-296	up
LOC_Os02g12790	650.073	1237.47	62.6779	-4.3024	3.92757e-297	7.07937e-296	down
LOC_Os02g37880	2201.71	3410.18	993.246	-1.77926	4.14083e-297	7.45833e-296	down
LOC_Os05g11510	707.276	1375.73	38.8243	-5.14805	4.62509e-297	8.32449e-296	down
LOC_Os07g34520	1186.83	1998.04	375.618	-2.4093	1.38227e-296	2.48608e-295	down
LOC_Os11g42550	2270.13	4528.87	11.387	-8.63596	2.52004e-296	4.5291e-295	down
LOC_Os01g31020	1069.14	1860.28	277.995	-2.74114	3.39401e-296	6.0954e-295	down
LOC_Os03g59264	1140.25	1932.55	347.946	-2.47313	1.57167e-295	2.82055e-294	down
LOC_Os02g07260	7178.08	4103.74	10252.4	1.32187	2.11122e-295	3.7861e-294	up
LOC_Os06g51410	1517.1	555.595	2478.6	2.15793	2.3244e-295	4.16539e-294	up
LOC_Os06g51460	680.579	1291.27	69.891	-4.1998	4.83477e-295	8.65774e-294	down
LOC_Os02g50010	986.194	1725.59	246.798	-2.80324	6.16954e-295	1.10399e-293	down
LOC_Os03g46550	1086.76	1845.47	328.044	-2.49362	2.00759e-294	3.58984e-293	down
LOC_Os03g56950	652.807	1244.04	61.574	-4.33511	2.0801e-294	3.71681e-293	down
LOC_Os01g34880	1606.09	584.246	2627.92	2.1694	2.78099e-294	4.9656e-293	up
LOC_Os05g02760	902.026	176.843	1627.21	3.20128	4.44958e-294	7.9392e-293	up
LOC_Os04g34460	2643.21	5275.88	10.5379	-8.97088	1.20804e-293	2.15391e-292	down
LOC_Os03g06520	2088.13	3317.32	858.944	-1.94834	1.25576e-293	2.23738e-292	down
LOC_Os08g33750	2053.33	878.96	3227.69	1.87826	1.77443e-293	3.15921e-292	up
LOC_Os04g57810	3423.56	1723.23	5123.9	1.57314	1.91043e-293	3.3989e-292	up
LOC_Os01g50860	997.619	1705.75	289.484	-2.55912	4.37573e-293	7.77936e-292	down
LOC_Os06g01500	1386.42	483.799	2289.03	2.24306	5.13058e-293	9.11481e-292	up
LOC_Os04g38640	768.423	1505.99	30.859	-5.61711	9.73772e-293	1.72873e-291	down
LOC_Os05g12450	783.991	1406.96	161.023	-3.12544	1.13342e-292	2.01069e-291	down
LOC_Os07g42626	921.96	192.047	1651.87	3.11339	1.33649e-292	2.36924e-291	up
LOC_Os03g09220	2912.68	4454.84	1370.52	-1.70007	1.82868e-292	3.23945e-291	down
LOC_Os01g12560	746.905	1355.16	138.652	-3.28764	4.13714e-292	7.32358e-291	down
LOC_Os08g24790	858.989	46.8531	1671.13	5.13962	1.99204e-291	3.52378e-290	up
LOC_Os04g45170	928.25	205.357	1651.14	3.00033	2.90621e-291	5.13721e-290	up
LOC_Os12g41390	3155.19	4727.63	1582.75	-1.57849	1.39413e-290	2.46259e-289	down
LOC_Os04g52230	722.417	1322.56	122.274	-3.43821	2.31453e-290	4.08548e-289	down
LOC_Os01g11414	2836.76	1322.15	4351.37	1.72068	2.94815e-290	5.20019e-289	up
LOC_Os11g26150	770.863	1389.72	152.007	-3.19116	3.29522e-290	5.80824e-289	down
LOC_Os01g01484	1362.93	2236.16	489.705	-2.1896	3.31643e-290	5.84146e-289	down
LOC_Os03g31839	3389.68	5304	1475.37	-1.84524	1.00921e-289	1.77633e-288	down
novel.166	775.945	111.282	1440.61	3.69251	1.13869e-289	2.0028e-288	up
LOC_Os02g04170	1188.23	2008.86	367.6	-2.45162	2.61927e-289	4.60365e-288	down
LOC_Os07g42960	11838.6	7254.2	16423.1	1.17838	4.45675e-289	7.82766e-288	up
LOC_Os02g09940	946.023	1870.57	21.4759	-6.455	8.31052e-289	1.45859e-287	down
LOC_Os05g33630	666.113	1285.69	46.5373	-4.79001	1.41882e-288	2.48842e-287	down
LOC_Os07g36590	2194.89	3472.49	917.299	-1.91919	1.55533e-287	2.72592e-286	down
LOC_Os06g09610	3818.56	7628.65	8.46377	-9.81522	3.79218e-287	6.64155e-286	down
LOC_Os07g23810	823.787	1460.27	187.306	-2.96186	5.32166e-287	9.31365e-286	down
LOC_Os03g11520	3849.78	5678.99	2020.57	-1.49007	7.50938e-287	1.31332e-285	down
LOC_Os01g53680	1168.39	361.028	1975.76	2.45418	1.18714e-286	2.07473e-285	up
LOC_Os03g17470	1408.32	2292.36	524.274	-2.12762	1.19515e-286	2.08724e-285	down
LOC_Os01g63540	1410.1	22.3903	2797.82	6.95295	1.71331e-286	2.99006e-285	up
LOC_Os06g01210	17088.1	34170.9	5.25483	-12.667	3.38425e-286	5.90202e-285	down
LOC_Os07g32590	662.012	1249.64	74.3818	-4.0652	3.43688e-286	5.98957e-285	down
LOC_Os05g28740	1275.55	2092.89	458.21	-2.19148	6.65269e-286	1.15857e-284	down
LOC_Os06g04610	693.172	1274.42	111.925	-3.51392	9.32904e-286	1.62351e-284	down
LOC_Os02g31070	1647.9	2628.97	666.827	-1.97988	1.08488e-285	1.88666e-284	down
LOC_Os07g09970	1208.63	2042.85	374.409	-2.44866	1.19256e-285	2.07248e-284	down
LOC_Os01g35050	4730.13	2570.4	6889.86	1.42119	1.3233e-285	2.29806e-284	up
LOC_Os06g50070	686.548	1284.02	89.0769	-3.84516	2.4811e-285	4.30569e-284	down
LOC_Os04g49450	5841.66	8556.84	3126.47	-1.453	2.96058e-285	5.13416e-284	down
LOC_Os07g28090	836.962	1478.78	195.143	-2.92238	4.0677e-285	7.04915e-284	down
LOC_Os06g01950	845.56	1666.18	24.9423	-6.06808	4.74038e-285	8.20912e-284	down
LOC_Os08g36630	879.113	183.743	1574.48	3.10119	5.33521e-285	9.23276e-284	up
LOC_Os01g47340	4992.32	7264.6	2720.03	-1.41734	5.42159e-285	9.37567e-284	down
LOC_Os06g38210	15779.6	9920.09	21639.1	1.12524	5.99182e-285	1.03545e-283	up
LOC_Os01g71620	2315.02	3718.25	911.789	-2.02774	9.45203e-285	1.63228e-283	down
LOC_Os08g37940	1790.52	3568.81	12.228	-8.18527	1.95416e-284	3.3723e-283	down
LOC_Os01g62460	8156.4	11800.8	4512	-1.38735	3.15765e-284	5.44536e-283	down
LOC_Os01g56350	1008.04	1712.37	303.713	-2.49541	8.03495e-284	1.38466e-282	down
LOC_Os03g61090	1028.06	2037.16	18.9519	-6.74552	1.21317e-283	2.08919e-282	down
LOC_Os07g41710	1425.57	2310.85	540.295	-2.09713	1.6183e-283	2.78492e-282	down
LOC_Os02g03280	1927.32	734.792	3119.86	2.08303	1.77908e-283	3.05947e-282	up
LOC_Os03g04300	977.597	1727.58	227.614	-2.92487	2.2618e-283	3.8869e-282	down
LOC_Os02g45120	748.132	1348.76	147.5	-3.19588	2.55169e-283	4.38203e-282	down
LOC_Os01g21450	3590.88	5256.69	1925.07	-1.44889	8.023e-283	1.37684e-281	down
LOC_Os02g20490	680.01	1274.12	85.898	-3.88982	9.67253e-283	1.65876e-281	down
LOC_Os09g14600	843.295	1498.72	187.868	-2.99806	2.27228e-282	3.89408e-281	down
LOC_Os12g21710	1668.24	2704.93	631.553	-2.10047	2.45372e-282	4.2021e-281	down
LOC_Os12g36680	897.884	190.655	1605.11	3.06351	1.21256e-281	2.07513e-280	up
LOC_Os10g04270	772.181	107.951	1436.41	3.73667	1.39745e-281	2.38989e-280	up
LOC_Os01g72205	615.207	1173.04	57.3702	-4.35772	2.64106e-281	4.51354e-280	down
LOC_Os06g43430	623.247	1185.18	61.3111	-4.27209	4.82714e-281	8.24384e-280	down
LOC_Os12g36720	954.402	228.519	1680.29	2.87847	7.30019e-281	1.24587e-279	up
LOC_Os12g25630	779.069	114.858	1443.28	3.6518	1.06718e-280	1.82003e-279	up
novel.14	1844	17.8356	3670.15	7.66665	1.68955e-280	2.87947e-279	up
LOC_Os04g52614	1731.74	2729.6	733.882	-1.89473	1.8771e-280	3.1969e-279	down
LOC_Os09g26420	26220.9	35735.9	16705.9	-1.09713	2.7936e-280	4.7545e-279	down
LOC_Os09g38400	984.726	213.935	1755.52	3.02999	3.15084e-280	5.35881e-279	up
LOC_Os03g02830	619.562	1185.16	53.9672	-4.45503	3.15572e-280	5.36342e-279	down
LOC_Os05g38570	2645.94	5282.17	9.7009	-9.09857	4.15821e-280	7.06239e-279	down
LOC_Os04g42520	1789.06	2825.07	753.049	-1.90634	9.01632e-280	1.5303e-278	down
LOC_Os03g27770	1368.75	2219.29	518.218	-2.09909	1.06273e-279	1.80249e-278	down
LOC_Os09g36860	1111.61	325.378	1897.84	2.54181	2.76229e-279	4.68187e-278	up
LOC_Os12g39440	780.558	1387.97	173.151	-3.00249	2.92846e-279	4.96012e-278	down
LOC_Os03g22490	7336.55	11498.9	3174.22	-1.85687	6.07666e-279	1.02854e-277	down
LOC_Os07g45080	1237.59	24.4409	2450.73	6.6457	7.94592e-279	1.34401e-277	up
LOC_Os07g29240	688.066	1343.93	32.2054	-5.38607	1.09639e-278	1.85322e-277	down
LOC_Os09g07440	926.071	1611.77	240.368	-2.74772	1.63319e-278	2.75867e-277	down
LOC_Os05g40770	1781.1	706.065	2856.14	2.01819	1.71474e-278	2.89444e-277	up
LOC_Os01g22510	1632.86	2608.62	657.106	-1.9901	1.91351e-278	3.22776e-277	down
LOC_Os02g18180	819.974	157.16	1482.79	3.23953	2.75711e-278	4.64759e-277	up
LOC_Os04g35180	1215.4	2040.54	390.27	-2.38506	6.71809e-278	1.13168e-276	down
LOC_Os02g03580	1563.35	2498.98	627.715	-1.99306	9.78905e-278	1.64787e-276	down
LOC_Os03g38730	5523.06	10047.1	998.999	-3.33033	1.23642e-277	2.07995e-276	down
LOC_Os09g25150	2396.81	3733.48	1060.14	-1.81582	1.26221e-277	2.12188e-276	down
LOC_Os06g49160	2918	5826.91	9.08645	-9.33029	3.93714e-277	6.61418e-276	down
LOC_Os08g36140	625.707	1190.53	60.8889	-4.29781	7.26828e-277	1.2202e-275	down
LOC_Os05g29860	852.78	1485.38	220.177	-2.75511	1.27285e-276	2.13542e-275	down
LOC_Os04g12920	826.08	1505.77	146.39	-3.35948	1.71704e-276	2.87866e-275	down
LOC_Os01g07500	1037.25	288.02	1786.48	2.62871	1.95568e-276	3.27653e-275	up
LOC_Os05g01280	1519.12	2424.91	613.327	-1.98354	2.28427e-276	3.82445e-275	down
LOC_Os07g41080	845.998	1478.63	213.365	-2.79185	2.91831e-276	4.88269e-275	down
LOC_Os06g47650	1847.62	767.114	2928.12	1.93103	3.83913e-276	6.41898e-275	up
LOC_Os10g38360	937.955	214.25	1661.66	2.94459	1.2489e-275	2.08674e-274	up
LOC_Os03g06620	8138.02	4753.93	11522.1	1.27824	2.13736e-275	3.56882e-274	up
LOC_Os07g38850	917.494	1616.35	218.637	-2.88576	6.24142e-275	1.04145e-273	down
LOC_Os03g22050	805.864	120.821	1490.91	3.60768	2.15499e-274	3.59339e-273	up
LOC_Os10g37400	1086.94	269.709	1904.17	2.8069	2.84557e-274	4.74173e-273	up
LOC_Os03g55100	603.459	1154.41	52.5103	-4.4572	2.9795e-274	4.96154e-273	down
LOC_Os03g49940	1062.33	1789.36	335.313	-2.41627	5.1444e-274	8.56083e-273	down
LOC_Os04g02900	3827.88	5598.41	2057.35	-1.44405	5.23806e-274	8.71083e-273	down
LOC_Os06g46740	1672.11	2765.37	578.847	-2.25628	5.53591e-274	9.19996e-273	down
LOC_Os03g22670	786.895	1452.22	121.571	-3.57753	6.42469e-274	1.06698e-272	down
LOC_Os10g34083	665.399	1290.37	40.4266	-5.00266	1.4333e-273	2.37875e-272	down
novel.151	1554	2618.18	489.824	-2.41766	3.99933e-273	6.63298e-272	down
LOC_Os02g02770	836.31	1461.83	210.787	-2.79713	6.37789e-273	1.05708e-271	down
LOC_Os12g18640	1243.79	2068.37	419.208	-2.30311	8.41921e-273	1.39447e-271	down
LOC_Os02g32610	4407.96	6509.74	2306.17	-1.49647	1.44491e-272	2.39161e-271	down
LOC_Os01g04950	1431.2	2288.8	573.6	-1.99648	1.77857e-272	2.94191e-271	down
LOC_Os02g37610	1869.61	748.219	2991	1.99539	2.23347e-272	3.69187e-271	up
LOC_Os03g55164	828.093	1476.94	179.244	-3.04229	2.25048e-272	3.71751e-271	down
LOC_Os05g30190	810.723	1417.9	203.542	-2.80135	2.89865e-272	4.78499e-271	down
LOC_Os05g01520	735.208	1335.27	135.149	-3.30956	4.61922e-272	7.62018e-271	down
LOC_Os11g13570	758.7	110.076	1407.32	3.68554	5.53999e-272	9.13303e-271	up
LOC_Os05g01540	1595.35	2620.27	570.428	-2.19733	7.74526e-272	1.27601e-270	down
LOC_Os07g23520	1297.12	2118.95	475.283	-2.15844	1.23137e-271	2.02728e-270	down
LOC_Os08g02070	2349.68	1036.47	3662.88	1.81934	1.4834e-271	2.4406e-270	up
LOC_Os01g24090	676.032	1318.13	33.9331	-5.28071	1.60956e-271	2.64641e-270	down
LOC_Os11g32160	1225.8	2031.65	419.951	-2.27224	1.98031e-271	3.25381e-270	down
LOC_Os01g04350	1565.65	2579.65	551.65	-2.22737	3.49283e-271	5.7352e-270	down
LOC_Os07g37240	3706.28	7404.62	7.93949	-9.87525	6.33013e-271	1.03871e-269	down
LOC_Os04g46610	1118.79	2221.71	15.8707	-7.1387	9.06616e-271	1.48668e-269	down
LOC_Os05g06970	2100.34	15.3051	4185.38	8.0829	1.73248e-270	2.83905e-269	up
LOC_Os02g48210	915.824	216.303	1615.34	2.89764	2.30647e-270	3.77717e-269	up
LOC_Os03g01270	821.008	133.954	1508.06	3.48248	2.42654e-270	3.97116e-269	up
LOC_Os03g50885	5859.68	3290.43	8428.94	1.35766	3.56533e-270	5.83101e-269	up
LOC_Os11g07940	759.954	1495.48	24.4235	-5.9469	6.2566e-270	1.02257e-268	down
LOC_Os03g62620	2288.93	1037.63	3540.22	1.77091	6.67154e-270	1.08967e-268	up
LOC_Os04g33150	855.696	36.2307	1675.16	5.53411	1.26179e-269	2.05953e-268	up
LOC_Os04g47220	24631	15817.9	33444.1	1.07993	1.80291e-269	2.94083e-268	up
LOC_Os07g39350	4477.89	6533.22	2422.56	-1.43155	2.17516e-269	3.54568e-268	down
LOC_Os11g02389	8051.69	16097.6	5.81008	-11.4288	2.57177e-269	4.18942e-268	down
LOC_Os11g47840	1043.11	264.882	1821.34	2.78322	4.84908e-269	7.89397e-268	up
novel.684	3277.62	6249.89	305.349	-4.35485	7.21749e-269	1.17418e-267	down
LOC_Os12g09300	938.814	242.287	1635.34	2.75376	1.07363e-268	1.7455e-267	up
LOC_Os08g05650	935.254	1594.8	275.706	-2.53113	1.23129e-268	2.0005e-267	down
LOC_Os09g21370	727.946	74.5191	1381.37	4.212	1.72172e-268	2.79548e-267	up
LOC_Os03g62790	2631.31	1285.27	3977.34	1.62924	2.04208e-268	3.31345e-267	up
LOC_Os03g27040	616.453	1180.22	52.6913	-4.48023	2.54167e-268	4.12137e-267	down
LOC_Os09g30410	623.865	1210.04	37.6894	-5.00461	2.61353e-268	4.23511e-267	down
LOC_Os09g28910	1877.37	2939.32	815.423	-1.84878	2.7199e-268	4.4046e-267	down
LOC_Os08g19114	2829.79	4304.21	1355.36	-1.66645	2.82905e-268	4.57836e-267	down
LOC_Os07g31500	1390.75	502.65	2278.85	2.17897	2.92794e-268	4.73529e-267	up
LOC_Os08g27010	2678.09	5347.23	8.94375	-9.20753	3.43334e-268	5.54903e-267	down
LOC_Os06g11210	840.424	36.7575	1644.09	5.4778	5.57427e-268	9.00335e-267	up
LOC_Os08g07330	1387.12	2271.63	502.606	-2.1778	6.08889e-268	9.82813e-267	down
novel.467	990.092	1706.76	273.423	-2.64177	8.9973e-268	1.45131e-266	down
LOC_Os05g39240	1220.56	409.639	2031.49	2.30897	1.05397e-267	1.699e-266	up
LOC_Os06g50900	854.228	197.439	1511.02	2.93908	1.24855e-267	2.01136e-266	up
LOC_Os05g28870	2567.38	3859	1275.76	-1.59725	1.25508e-267	2.02056e-266	down
LOC_Os12g37610	599.531	1132.65	66.4141	-4.08524	2.2475e-267	3.6159e-266	down
LOC_Os03g13390	4337.9	2355.66	6320.14	1.42383	2.46145e-267	3.95755e-266	up
LOC_Os11g34870	666.731	1273.19	60.272	-4.40561	3.21225e-267	5.16132e-266	down
LOC_Os06g39390	907.853	195.145	1620.56	3.05658	5.85111e-267	9.39523e-266	up
LOC_Os03g43930	2875.17	1348.47	4401.87	1.70836	8.26891e-267	1.32689e-265	up
LOC_Os08g01090	1660.25	2632.29	688.207	-1.9352	3.54171e-266	5.67961e-265	down
LOC_Os03g51930	1059.61	1783.61	335.621	-2.41193	4.5111e-266	7.22945e-265	down
LOC_Os08g23810	967.504	263.276	1671.73	2.66686	4.57669e-266	7.32982e-265	up
LOC_Os07g38730	5044.19	2838.82	7249.56	1.35261	4.73711e-266	7.58183e-265	up
LOC_Os07g43050	2114.11	3250.87	977.349	-1.73258	4.96469e-266	7.94093e-265	down
LOC_Os07g48810	1142.83	1904.8	380.871	-2.32337	5.29171e-266	8.45852e-265	down
LOC_Os05g39720	894.642	31.827	1757.46	5.77966	5.60052e-266	8.94635e-265	up
LOC_Os06g49790	3829.64	5552.53	2106.75	-1.39793	7.98401e-266	1.27455e-264	down
LOC_Os03g41510	1557.97	3103.95	11.9854	-8.0182	9.88911e-266	1.57766e-264	down
LOC_Os08g44520	2812.27	4431.94	1192.59	-1.89444	1.02308e-265	1.63112e-264	down
LOC_Os02g51480	636.914	1174.74	99.0865	-3.57148	1.78062e-265	2.83705e-264	down
LOC_Os02g36414	771.443	133.277	1409.61	3.39298	4.64436e-265	7.39506e-264	up
LOC_Os09g19970	689.696	70.9434	1308.45	4.20128	6.01679e-265	9.57417e-264	up
LOC_Os06g34070	604.231	1131.02	77.4439	-3.86618	9.44654e-265	1.50221e-263	down
LOC_Os02g07350	1185.71	1953.33	418.1	-2.22264	1.38687e-264	2.20401e-263	down
LOC_Os01g39270	914.365	1568.52	260.206	-2.58888	1.75328e-264	2.78451e-263	down
LOC_Os02g17534	580.703	1111.08	50.3297	-4.46743	1.75687e-264	2.78843e-263	down
LOC_Os03g53050	2132.63	930.491	3334.77	1.84365	3.45708e-264	5.48339e-263	up
LOC_Os05g10570	735.799	1322.14	149.456	-3.14571	4.94931e-264	7.84525e-263	down
LOC_Os07g45490	739.157	46.2074	1432.11	4.95092	2.6254e-263	4.15891e-262	up
LOC_Os03g53650	3626.14	1799.04	5453.24	1.59949	3.44214e-263	5.44921e-262	up
LOC_Os09g25550	742.543	1317.47	167.612	-2.97564	6.06521e-263	9.59561e-262	down
LOC_Os07g14610	572.187	1092.16	52.2141	-4.38548	1.047e-262	1.65538e-261	down
LOC_Os06g42060	915.702	1596.77	234.633	-2.76946	1.13575e-262	1.79454e-261	down
LOC_Os06g03930	5131.01	7282.36	2979.66	-1.28931	1.32376e-262	2.09028e-261	down
LOC_Os09g17630	573.707	1090.29	57.128	-4.25228	1.42427e-262	2.24754e-261	down
LOC_Os05g44330	710.059	1287.11	133.012	-3.27414	2.31079e-262	3.64418e-261	down
LOC_Os08g17410	992.75	288.498	1697	2.55962	4.09639e-262	6.456e-261	up
LOC_Os02g43540	2153.31	786.446	3520.17	2.15642	6.1619e-262	9.7051e-261	up
LOC_Os03g37864	1647.09	2661.96	632.218	-2.0744	6.65787e-262	1.04796e-260	down
LOC_Os04g44910	972.284	274.593	1669.97	2.61065	6.69245e-262	1.05273e-260	up
LOC_Os07g41360	2262.53	1057.41	3467.66	1.71475	6.77879e-262	1.06563e-260	up
LOC_Os07g25430	6048.77	12091.5	6.08359	-10.946	9.54569e-262	1.49964e-260	down
LOC_Os05g03000	1366.43	2211.9	520.965	-2.08518	1.2963e-261	2.03521e-260	down
LOC_Os01g04860	633.124	1231.27	34.9736	-5.14478	1.49368e-261	2.34361e-260	down
LOC_Os12g02300	1451.69	2345.39	557.991	-2.07229	3.84527e-260	6.02946e-259	down
LOC_Os03g16910	4760.17	6877.92	2642.42	-1.38082	8.32264e-260	1.30418e-258	down
LOC_Os07g33300	3176.06	5013.59	1338.52	-1.90604	1.26356e-259	1.97878e-258	down
LOC_Os03g58470	4865.2	2417.66	7312.74	1.59858	2.75396e-259	4.31007e-258	up
LOC_Os11g09864	742.001	1322.17	161.832	-3.02982	2.80793e-259	4.39175e-258	down
LOC_Os06g48200	637.793	1240.45	35.1353	-5.14406	2.88961e-259	4.51664e-258	down
LOC_Os06g34840	1429.74	18.8397	2840.65	7.23711	3.12202e-259	4.87682e-258	up
LOC_Os11g05190	793.364	40.3777	1546.35	5.28707	3.99327e-259	6.23384e-258	up
LOC_Os02g15640	2312.93	3599.42	1026.44	-1.81118	5.34663e-259	8.34128e-258	down
LOC_Os03g19380	1319.6	2626.44	12.755	-7.67537	5.43875e-259	8.47965e-258	down
LOC_Os05g01810	1735.41	647.296	2823.51	2.11923	5.95523e-259	9.27904e-258	up
LOC_Os06g02580	565.051	1075.96	54.1412	-4.30874	6.92178e-259	1.07783e-257	down
LOC_Os08g44340	3847.17	2122.52	5571.82	1.39129	7.54365e-259	1.17392e-257	up
LOC_Os01g51754	1728.24	2706.18	750.3	-1.85071	7.72142e-259	1.20083e-257	down
LOC_Os03g19290	700.087	1249.58	150.593	-3.05497	7.97666e-259	1.23974e-257	down
LOC_Os02g47780	714.323	60.1915	1368.45	4.50617	1.35655e-258	2.10705e-257	up
LOC_Os02g11770	739.333	1325.97	152.694	-3.11784	1.54755e-258	2.4022e-257	down
LOC_Os02g07410	2007.51	864.399	3150.61	1.86816	2.11828e-258	3.28606e-257	up
LOC_Os05g38040	1255.45	444.375	2066.52	2.21899	5.40702e-258	8.38258e-257	up
LOC_Os07g36180	751.184	1335.01	167.36	-2.99541	5.70926e-258	8.8456e-257	down
LOC_Os06g51470	578.475	1093.11	63.8409	-4.09809	8.20902e-258	1.27106e-256	down
LOC_Os06g47700	752.88	55.028	1450.73	4.73041	8.76269e-258	1.35567e-256	up
LOC_Os06g13810	6734.16	4073.36	9394.96	1.20582	8.76643e-258	1.35567e-256	up
LOC_Os02g35180	1736.25	2733.54	738.949	-1.88668	9.01216e-258	1.3928e-256	down
LOC_Os10g42720	1078.8	1796.02	361.578	-2.31117	2.33233e-257	3.60229e-256	down
LOC_Os01g18670	4189.22	2019.23	6359.21	1.65255	2.33905e-257	3.61041e-256	up
LOC_Os09g24924	1152.67	1905.43	399.914	-2.25453	2.51763e-257	3.88362e-256	down
LOC_Os04g47290	795.602	1378.55	212.65	-2.69553	2.73029e-257	4.20905e-256	down
LOC_Os11g43860	1751.04	2729.94	772.148	-1.82209	3.14717e-257	4.84868e-256	down
LOC_Os03g13300	727.449	128.701	1326.2	3.36147	3.89478e-257	5.99674e-256	up
LOC_Os04g40040	6446.86	3367.88	9525.84	1.50124	3.93898e-257	6.06103e-256	up
LOC_Os07g32020	775.296	1528.39	22.1984	-6.10478	5.11571e-257	7.8668e-256	down
LOC_Os08g25720	9057.17	5645.66	12468.7	1.14337	5.58739e-257	8.58679e-256	up
LOC_Os08g09270	764.672	1347.11	182.23	-2.88626	6.82137e-257	1.04767e-255	down
LOC_Os12g36850	974.326	27.8875	1920.76	6.10679	8.97372e-257	1.37738e-255	up
LOC_Os09g32760	2362.7	3566.2	1159.2	-1.62074	9.25889e-257	1.42027e-255	down
LOC_Os02g19950	803.72	1416.85	190.588	-2.89258	1.29347e-256	1.9829e-255	down
LOC_Os02g56200	1513.47	2387.75	639.189	-1.90052	1.97954e-256	3.03276e-255	down
LOC_Os05g49220	649.461	1179.19	119.728	-3.29786	2.43651e-256	3.73055e-255	down
LOC_Os05g15510	756.824	1322.87	190.774	-2.79413	4.26009e-256	6.51859e-255	down
LOC_Os03g38950	703.004	1382.39	23.6205	-5.86914	8.17803e-256	1.25059e-254	down
LOC_Os07g04500	975.51	1934.96	16.0623	-6.91419	1.23882e-255	1.89324e-254	down
LOC_Os01g14810	1998.81	3124.73	872.888	-1.84159	1.52852e-255	2.33454e-254	down
LOC_Os07g47750	959.682	263.103	1656.26	2.66122	2.09635e-255	3.19981e-254	up
LOC_Os10g40570	1371.64	2181.75	561.518	-1.95815	2.42906e-255	3.70537e-254	down
LOC_Os03g54130	2774.19	5540.21	8.16987	-9.40491	2.5267e-255	3.85194e-254	down
LOC_Os11g37970	829.185	1441.97	216.399	-2.73743	2.61124e-255	3.97835e-254	down
LOC_Os03g60840	1531.96	2464.85	599.072	-2.03948	3.37842e-255	5.14402e-254	down
LOC_Os09g36930	1927.8	3845.65	9.96108	-8.59756	3.78586e-255	5.76084e-254	down
LOC_Os05g25310	5219.57	3037.42	7401.72	1.28399	5.19717e-255	7.90354e-254	up
LOC_Os03g02640	583.51	1078.08	88.9436	-3.60232	5.3586e-255	8.14401e-254	down
LOC_Os01g70820	777.364	1358.31	196.413	-2.79043	6.33528e-255	9.62246e-254	down
LOC_Os09g12300	652.24	1277.66	26.8239	-5.57174	7.84708e-255	1.19114e-253	down
LOC_Os03g15740	2371.01	3576.61	1165.4	-1.6174	1.06984e-254	1.62295e-253	down
LOC_Os03g23980	768.119	1391.79	144.45	-3.27082	1.23544e-254	1.87302e-253	down
LOC_Os03g21030	2038.89	904.412	3173.36	1.81094	1.58171e-254	2.39652e-253	up
LOC_Os02g47130	708.021	57.185	1358.86	4.5537	3.53104e-254	5.34675e-253	up
LOC_Os01g70170	8263.93	4729.39	11798.5	1.31849	5.44827e-254	8.24481e-253	up
LOC_Os03g16980	11964.2	7702.36	16226.1	1.07477	5.74468e-254	8.68803e-253	up
LOC_Os03g55090	767.282	1343.48	191.084	-2.81611	5.87607e-254	8.88131e-253	down
LOC_Os03g09880	758.48	154.913	1362.05	3.13735	7.61797e-254	1.1507e-252	up
LOC_Os01g53294	2350.35	1160.46	3540.24	1.60946	9.51766e-254	1.43678e-252	up
LOC_Os05g49860	1355.9	519.067	2192.74	2.07843	1.09627e-253	1.65391e-252	up
LOC_Os06g14630	1197.35	20.6113	2374.1	6.84105	2.80702e-253	4.23228e-252	up
LOC_Os06g14324	4751.08	9495.87	6.29124	-10.5302	3.65994e-253	5.51491e-252	down
LOC_Os07g01904	2616.73	3994.49	1238.98	-1.68748	4.28683e-253	6.45559e-252	down
LOC_Os07g35480	664.03	76.7574	1251.3	4.01979	4.31534e-253	6.49455e-252	up
LOC_Os11g05470	692.554	108.112	1277	3.5546	4.98635e-253	7.49987e-252	up
LOC_Os12g02370	2020.94	3098.08	943.802	-1.71441	5.38808e-253	8.09917e-252	down
LOC_Os11g24050	1847.87	2905.4	790.34	-1.87624	1.00143e-252	1.5044e-251	down
LOC_Os05g45080	783.685	1362.44	204.935	-2.73417	3.49987e-252	5.25448e-251	down
LOC_Os07g40890	690.376	49.1886	1331.56	4.75496	4.83533e-252	7.25505e-251	up
LOC_Os07g30960	622.703	1216.43	28.9776	-5.39403	6.28783e-252	9.42869e-251	down
LOC_Os07g04840	18119.7	36235.2	4.10787	-13.1142	7.46063e-252	1.11805e-250	down
LOC_Os11g34180	901.341	1526.37	276.314	-2.46769	1.3892e-251	2.08061e-250	down
LOC_Os07g47210	669.993	86.642	1253.34	3.85516	1.5496e-251	2.31942e-250	up
LOC_Os02g47600	3417.94	5293.07	1542.81	-1.77855	2.18567e-251	3.2695e-250	down
LOC_Os12g44190	1049.4	23.0451	2075.75	6.49804	4.99785e-251	7.47169e-250	up
LOC_Os04g31030	1386.15	528	2244.3	2.08424	9.11112e-251	1.36127e-249	up
LOC_Os11g16580	1045.52	1751.26	339.783	-2.36546	1.05804e-250	1.57984e-249	down
LOC_Os01g40200	1379.32	535.353	2223.29	2.05178	1.84416e-250	2.75199e-249	up
LOC_Os01g25920	2786.98	4090.02	1483.95	-1.46248	2.08914e-250	3.11567e-249	down
LOC_Os03g48170	731.488	1276.52	186.459	-2.77502	4.84164e-250	7.21632e-249	down
LOC_Os09g19850	1008.24	1679.26	337.222	-2.31655	6.57236e-250	9.79e-249	down
LOC_Os07g04160	592.162	1152.05	32.274	-5.16409	7.59067e-250	1.13e-248	down
LOC_Os02g15540	926.689	1560.05	293.326	-2.41178	8.05465e-250	1.19835e-248	down
LOC_Os07g32630	772.147	1524.76	19.5354	-6.28577	8.78182e-250	1.30575e-248	down
LOC_Os10g30870	1879.1	2907.41	850.794	-1.77381	1.38584e-249	2.05934e-248	down
LOC_Os03g63390	831.164	206.955	1455.37	2.82123	1.59622e-249	2.37054e-248	up
LOC_Os01g67860	30859.5	19188.5	42530.6	1.14851	2.85801e-249	4.24187e-248	up
LOC_Os03g40194	657.996	70.2726	1245.72	4.14517	6.50738e-249	9.65248e-248	up
LOC_Os04g51880	3514.99	5070.75	1959.23	-1.37157	8.91009e-249	1.32085e-247	down
LOC_Os08g37370	5675.01	8451.48	2898.54	-1.54398	1.40708e-248	2.08464e-247	down
LOC_Os01g70770	585.936	1085.13	86.7373	-3.64458	1.41583e-248	2.09635e-247	down
LOC_Os10g19970	837.357	1448.2	226.513	-2.67631	2.35434e-248	3.48386e-247	down
LOC_Os03g01930	1351.17	2690.15	12.1848	-7.7795	2.76375e-248	4.08724e-247	down
LOC_Os04g43030	829.379	1413.22	245.538	-2.52535	3.83567e-248	5.66909e-247	down
LOC_Os01g10040	763.272	1352.18	174.359	-2.95454	5.81166e-248	8.58445e-247	down
LOC_Os01g17150	1766.41	3522.86	9.96108	-8.47093	6.19206e-248	9.14087e-247	down
LOC_Os01g03650	1121.61	1830.28	412.932	-2.14905	7.647e-248	1.1282e-246	down
LOC_Os11g41650	754.849	140.937	1368.76	3.28347	7.90673e-248	1.16582e-246	up
LOC_Os10g38580	595.361	1099.25	91.4672	-3.58246	8.28109e-248	1.22029e-246	down
LOC_Os10g32550	2174.01	1008.52	3339.5	1.72555	8.97017e-248	1.32104e-246	up
LOC_Os07g24230	580.244	1082.65	77.8388	-3.79382	2.92278e-247	4.30183e-246	down
LOC_Os06g36560	960.233	281.719	1638.75	2.53921	4.88823e-247	7.19035e-246	up
LOC_Os07g07540	4878.65	9751.18	6.12946	-10.6355	6.54863e-247	9.627e-246	down
LOC_Os05g49610	631.865	1154.81	108.921	-3.40425	7.86071e-247	1.1549e-245	down
LOC_Os04g37710	2709.13	3975.11	1443.14	-1.4616	1.25218e-246	1.83861e-245	down
LOC_Os03g02530	816.521	176.714	1456.33	3.03861	1.69151e-246	2.48222e-245	up
LOC_Os10g40740	3853.08	7699.43	6.73058	-10.1634	1.7471e-246	2.56227e-245	down
LOC_Os03g16470	570.467	1105.56	35.3767	-4.96754	4.33382e-246	6.35215e-245	down
LOC_Os04g35900	3754.7	5377.7	2131.7	-1.33513	6.16194e-246	9.02631e-245	down
LOC_Os02g55080	1975.52	3048.97	902.066	-1.75869	6.66402e-246	9.75599e-245	down
LOC_Os02g47360	700.555	1273.17	127.941	-3.31555	7.83855e-246	1.14687e-244	down
LOC_Os09g30100	542.657	1019.23	66.0807	-3.9432	9.33086e-246	1.3644e-244	down
novel.78	596.429	1121.94	70.9124	-3.98249	1.14723e-245	1.67654e-244	down
LOC_Os02g54254	2681.16	3998.84	1363.49	-1.55283	1.55069e-245	2.26481e-244	down
LOC_Os03g04660	595.888	1091.95	99.8291	-3.45573	1.62927e-245	2.37818e-244	down
LOC_Os04g48790	1979.97	925.273	3034.66	1.71252	3.01526e-245	4.39865e-244	up
LOC_Os05g05680	1516.72	2390.1	643.345	-1.89252	3.03541e-245	4.42543e-244	down
LOC_Os03g43410	669.553	48.0527	1291.05	4.75473	8.6283e-245	1.25721e-243	up
LOC_Os03g13000	840.652	1435.49	245.817	-2.54471	3.69222e-244	5.37667e-243	down
LOC_Os07g36250	689.126	1220.44	157.809	-2.95171	5.51427e-244	8.02525e-243	down
LOC_Os03g26910	960.973	255.663	1666.28	2.71261	1.04447e-243	1.51919e-242	up
LOC_Os03g60790	639.45	1154.03	124.869	-3.20412	1.36386e-243	1.98257e-242	down
LOC_Os12g40900	927.965	223.663	1632.27	2.86996	1.46136e-243	2.12305e-242	up
LOC_Os01g43760	1064.58	2115.72	13.4369	-7.29984	1.84995e-243	2.68601e-242	down
LOC_Os01g15790	707.545	1238.35	176.739	-2.80761	1.92185e-243	2.78877e-242	down
LOC_Os05g42190	817.683	202.064	1433.3	2.82754	3.61424e-243	5.2415e-242	up
LOC_Os02g08130	2730.49	4049.76	1411.22	-1.52071	4.27664e-243	6.19849e-242	down
LOC_Os02g41890	676.626	118.831	1234.42	3.38315	4.34464e-243	6.29336e-242	up
LOC_Os08g15230	3801.89	5744.95	1858.84	-1.62882	5.42763e-243	7.8575e-242	down
LOC_Os08g01170	1515.21	3019.6	10.8169	-8.12854	5.44686e-243	7.88073e-242	down
LOC_Os02g47150	734.778	111.982	1357.57	3.59446	6.34553e-243	9.17558e-242	up
LOC_Os01g63220	714.416	1270.26	158.57	-2.99954	6.45598e-243	9.32984e-242	down
LOC_Os10g41410	1442.5	562.066	2322.93	2.05132	7.90098e-243	1.14114e-241	up
LOC_Os06g06790	1073.47	361.329	1785.62	2.30692	1.33958e-242	1.93363e-241	up
LOC_Os07g32570	2406	3733.21	1078.79	-1.79125	1.61979e-242	2.33674e-241	down
LOC_Os01g54020	823.004	1409.69	236.317	-2.57412	2.19104e-242	3.15899e-241	down
LOC_Os05g07650	4397.38	2481.5	6313.25	1.34871	2.85179e-242	4.10923e-241	up
LOC_Os03g37840	791.999	1370.24	213.754	-2.68031	3.00395e-242	4.32596e-241	down
LOC_Os02g13510	2620.78	3908.72	1332.84	-1.55173	3.03952e-242	4.37464e-241	down
LOC_Os11g02350	2311.89	3483.89	1139.88	-1.612	3.46383e-242	4.98243e-241	down
LOC_Os03g26210	4067.16	5973.12	2161.19	-1.46669	3.50293e-242	5.03575e-241	down
LOC_Os11g26570	980.342	1692.86	267.825	-2.65723	3.56446e-242	5.12122e-241	down
LOC_Os08g10310	654.596	1164.74	144.454	-3.01194	4.16979e-242	5.98744e-241	down
LOC_Os02g11020	671.872	44.3789	1299.36	4.89307	1.31912e-241	1.89304e-240	up
LOC_Os06g02370	3916.12	1877.71	5954.53	1.6621	1.64193e-241	2.35493e-240	up
LOC_Os08g30730	1375.35	2207.1	543.598	-2.02257	1.73394e-241	2.48545e-240	down
LOC_Os10g37740	2903.5	4303.02	1503.99	-1.51657	2.56563e-241	3.67548e-240	down
LOC_Os04g45860	1020.25	328.492	1712.01	2.382	4.02748e-241	5.76634e-240	up
LOC_Os10g28020	3617.63	5268.31	1966.95	-1.42224	5.52936e-241	7.91208e-240	down
LOC_Os03g42630	802.62	30.5751	1574.66	5.68982	6.82239e-241	9.75665e-240	up
LOC_Os06g43600	754.91	169.284	1340.54	2.97944	7.96347e-241	1.13819e-239	up
LOC_Os10g02260	720.394	1255.92	184.866	-2.76404	1.25587e-240	1.79393e-239	down
novel.642	698.087	1237.64	158.534	-2.96737	1.62179e-240	2.31528e-239	down
LOC_Os09g20820	766.324	179.849	1352.8	2.91755	4.25568e-240	6.07196e-239	up
LOC_Os04g32950	9033.1	5506.2	12560	1.18905	4.68103e-240	6.675e-239	up
LOC_Os03g58090	1448.72	2279.92	617.519	-1.88405	4.95647e-240	7.06368e-239	down
LOC_Os01g63810	542.179	1009.22	75.1426	-3.74881	5.75702e-240	8.19986e-239	down
LOC_Os12g26940	687.421	120.866	1253.98	3.36803	6.83977e-240	9.73643e-239	up
LOC_Os02g39870	1050.44	1729.37	371.508	-2.22055	8.40792e-240	1.19618e-238	down
LOC_Os01g68480	1048.09	2082.71	13.4584	-7.27623	1.00835e-239	1.43374e-238	down
LOC_Os10g40130	772.142	1330.28	214.005	-2.63752	1.49538e-239	2.125e-238	down
LOC_Os06g39912	2345.7	3570.51	1120.88	-1.67128	2.27918e-239	3.23696e-238	down
LOC_Os06g15400	6624.95	13244.5	5.36657	-11.2994	2.41342e-239	3.42565e-238	down
LOC_Os01g65380	2975.82	1460.19	4491.45	1.62016	2.99494e-239	4.24862e-238	up
LOC_Os10g22520	952.582	1590.73	314.431	-2.33921	3.25381e-239	4.6132e-238	down
LOC_Os09g31120	865.901	245.451	1486.35	2.60132	5.30692e-239	7.51976e-238	up
LOC_Os10g35960	5339	7521.24	3156.76	-1.25312	5.82262e-239	8.24576e-238	down
LOC_Os02g48390	4100.9	2321.23	5880.56	1.34024	2.44095e-238	3.4548e-237	up
LOC_Os07g48970	1190.77	1942.36	439.188	-2.14537	3.66383e-238	5.18263e-237	down
LOC_Os06g48030	1843.88	828.19	2859.58	1.78839	6.6394e-238	9.38631e-237	up
LOC_Os10g11310	844.46	1455.04	233.882	-2.63714	9.98423e-238	1.41069e-236	down
LOC_Os03g40100	2813.78	4211.94	1415.62	-1.57249	1.03558e-237	1.46236e-236	down
LOC_Os02g44370	2173.99	3281.28	1066.7	-1.62065	1.11581e-237	1.57476e-236	down
LOC_Os08g39630	5348.7	8359.69	2337.72	-1.83884	2.49394e-237	3.51771e-236	down
LOC_Os04g52330	623.157	1114.51	131.801	-3.08368	2.90795e-237	4.09933e-236	down
LOC_Os02g51100	1591.69	2503.12	680.267	-1.88134	3.74461e-237	5.27575e-236	down
LOC_Os12g29520	1808.48	2763.38	853.576	-1.69413	3.88418e-237	5.46928e-236	down
LOC_Os05g22930	766.066	1360.13	172.005	-2.97995	6.91715e-237	9.73444e-236	down
LOC_Os08g01120	634.863	94.9116	1174.82	3.62536	9.07482e-237	1.27636e-235	up
LOC_Os05g43170	1541.86	2469.23	614.492	-2.0091	2.21832e-236	3.11826e-235	down
LOC_Os02g14900	1864.63	834.151	2895.12	1.79727	3.24942e-236	4.56508e-235	up
LOC_Os06g21820	753.646	180.092	1327.2	2.87986	3.47963e-236	4.88572e-235	up
LOC_Os03g37640	2809.46	4274.6	1344.31	-1.66868	3.7124e-236	5.20958e-235	down
LOC_Os01g68720	958.068	22.992	1893.14	6.34276	1.08889e-235	1.52716e-234	up
LOC_Os07g35310	1060.05	1748.48	371.622	-2.23306	1.37794e-235	1.93147e-234	down
LOC_Os07g49520	2316.43	1128.98	3503.88	1.63324	2.4695e-235	3.45953e-234	up
LOC_Os01g62070	4388.78	6358.2	2419.36	-1.39426	3.91432e-235	5.48049e-234	down
LOC_Os11g02369	6794.22	13583.2	5.19955	-11.336	5.43115e-234	7.59992e-233	down
LOC_Os02g47310	1606.4	2557.46	655.337	-1.96297	1.30897e-233	1.83063e-232	down
LOC_Os12g37550	3888.18	5499.71	2276.65	-1.27236	2.38647e-233	3.33567e-232	down
LOC_Os04g38220	1001.1	1678.33	323.865	-2.37324	3.95171e-233	5.52033e-232	down
LOC_Os07g36390	712.969	1407.48	18.4531	-6.25886	3.95834e-233	5.52646e-232	down
LOC_Os01g28500	1761.74	3514.41	9.06881	-8.60058	7.47268e-233	1.04272e-231	down
LOC_Os02g53530	655.192	1288.01	22.3709	-5.85843	1.25831e-232	1.75482e-231	down
LOC_Os08g31410	1815.1	2787.92	842.277	-1.72594	2.22597e-232	3.10254e-231	down
novel.322	588.021	1142.34	33.7002	-5.07957	2.42132e-232	3.37293e-231	down
LOC_Os06g51330	1273.59	2041.46	505.725	-2.01228	3.32016e-232	4.62241e-231	down
novel.31	563.505	1049.9	77.1105	-3.76593	3.38438e-232	4.70916e-231	down
novel.320	2865.35	4222.85	1507.85	-1.48462	4.90172e-232	6.81662e-231	down
LOC_Os07g49400	9028.98	5542.38	12515.6	1.1749	5.51864e-232	7.67023e-231	up
LOC_Os02g39740	1926.45	3844.49	8.40183	-8.82677	8.91246e-232	1.23803e-230	down
LOC_Os08g37950	2493.7	3685.44	1301.96	-1.50162	1.07587e-231	1.49364e-230	down
LOC_Os02g35490	1018.35	20.3841	2016.31	6.65795	1.21266e-231	1.6826e-230	up
LOC_Os12g35465	749.422	1324.26	174.587	-2.91945	1.26639e-231	1.75617e-230	down
LOC_Os05g20100	664	45.4016	1282.6	4.81582	1.44183e-231	1.99834e-230	up
LOC_Os12g28100	1017.34	332.271	1702.41	2.35461	1.99289e-231	2.76056e-230	up
LOC_Os05g44340	663.903	128.358	1199.45	3.22711	2.99077e-231	4.1405e-230	up
LOC_Os06g28950	1193.15	2374.95	11.3533	-7.70403	2.99577e-231	4.1451e-230	down
LOC_Os06g50300	6359.96	3887.33	8832.6	1.18365	4.02481e-231	5.56582e-230	up
LOC_Os11g14570	1072.43	1766.5	378.366	-2.22108	1.14748e-230	1.58594e-229	down
LOC_Os01g58320	633.553	44.332	1222.77	4.80517	1.39191e-230	1.92268e-229	up
LOC_Os05g03480	2625.37	3848.84	1401.91	-1.45643	2.17556e-230	3.00349e-229	down
LOC_Os05g35440	1778.57	2705.46	851.671	-1.66798	2.26712e-230	3.12814e-229	down
LOC_Os04g33060	1056.56	1752.65	360.468	-2.28157	4.30833e-230	5.94127e-229	down
LOC_Os04g37990	1070.21	317.988	1822.44	2.52263	5.44584e-230	7.50572e-229	up
LOC_Os03g31706	1257.59	2051.85	463.317	-2.14517	6.72809e-230	9.26782e-229	down
LOC_Os11g38790	672.45	35.1151	1309.78	5.22485	1.01115e-229	1.39206e-228	up
LOC_Os05g12170	516.171	993.527	38.816	-4.67653	1.16397e-229	1.60156e-228	down
LOC_Os01g02880	2847.7	1407.22	4288.17	1.60877	1.30984e-229	1.80127e-228	up
LOC_Os11g04460	1625.81	694.653	2556.96	1.88213	2.83261e-229	3.89318e-228	up
LOC_Os09g32870	509.2	960.738	57.6628	-4.05469	3.35671e-229	4.61096e-228	down
LOC_Os03g11890	2317.91	3526.56	1109.26	-1.66954	3.78656e-229	5.19853e-228	down
LOC_Os03g16020	632.414	86.9164	1177.91	3.75916	1.04095e-228	1.42831e-227	up
LOC_Os12g37560	967.774	320.218	1615.33	2.33318	3.4585e-228	4.74287e-227	up
LOC_Os12g41230	797.134	197.951	1396.32	2.83201	3.72636e-228	5.10736e-227	up
LOC_Os01g22520	8818.62	12043.3	5593.94	-1.10622	4.34267e-228	5.94878e-227	down
LOC_Os01g66110	1851.66	848.986	2854.34	1.74597	5.46121e-228	7.47686e-227	up
LOC_Os01g59840	1259.03	2507.18	10.8694	-7.85721	9.70048e-228	1.32734e-226	down
LOC_Os02g58650	1300.36	2059.57	541.16	-1.92831	1.34415e-227	1.83822e-226	down
LOC_Os05g06430	4176.59	2402.67	5950.52	1.30934	1.42205e-227	1.94368e-226	up
LOC_Os05g34070	11128.8	15465.2	6792.46	-1.18681	1.74183e-227	2.37945e-226	down
LOC_Os06g30310	3881.13	5646.12	2116.13	-1.41615	2.23352e-227	3.04943e-226	down
LOC_Os02g10140	613.672	79.8903	1147.45	3.85701	2.85914e-227	3.90143e-226	up
LOC_Os05g10930	1436.99	528.514	2345.47	2.1548	3.08427e-227	4.20632e-226	up
LOC_Os06g04620	1128.34	399.455	1857.22	2.2159	4.91699e-227	6.70208e-226	up
LOC_Os05g51830	3365.64	1773.46	4957.82	1.48104	5.54803e-227	7.55804e-226	up
LOC_Os02g45000	1275.82	2036.39	515.254	-1.9819	1.16424e-226	1.58516e-225	down
LOC_Os05g10690	1457.39	611.15	2303.63	1.91675	1.22363e-226	1.66511e-225	up
LOC_Os08g31460	943.074	1570.2	315.948	-2.31129	1.35808e-226	1.84705e-225	down
LOC_Os09g29430	551.066	1009.67	92.4595	-3.45429	1.80235e-226	2.44993e-225	down
LOC_Os03g48920	652.435	1144.8	160.073	-2.84146	2.06709e-226	2.80824e-225	down
LOC_Os05g45920	541.537	992.39	90.6839	-3.44746	2.49377e-226	3.38605e-225	down
LOC_Os04g24165	511.773	946.156	77.3895	-3.61314	2.64831e-226	3.59391e-225	down
LOC_Os02g34650	677.297	110.622	1243.97	3.49821	2.80809e-226	3.80864e-225	up
LOC_Os03g27390	3880.14	2256.85	5503.43	1.2852	3.60219e-226	4.88301e-225	up
LOC_Os08g14760	595.799	55.6152	1135.98	4.36695	6.68909e-226	9.06254e-225	up
LOC_Os01g12100	2275.05	1130.12	3419.97	1.59815	9.66478e-226	1.30869e-224	up
LOC_Os01g68680	1194.56	1951.92	437.199	-2.15851	1.04109e-225	1.40896e-224	down
LOC_Os09g24820	619.816	1218.39	21.2431	-5.83921	1.16872e-225	1.58081e-224	down
LOC_Os12g03040	1268.51	481.895	2055.12	2.09767	1.34287e-225	1.81538e-224	up
LOC_Os01g62290	2164.56	968.595	3360.53	1.79333	1.55387e-225	2.09947e-224	up
LOC_Os05g28510	1186.92	465.236	1908.6	2.03559	2.04447e-225	2.76081e-224	up
LOC_Os02g50280	532.464	990.401	74.527	-3.73548	2.10587e-225	2.84218e-224	down
LOC_Os01g55240	641.15	120.062	1162.24	3.2749	2.33943e-225	3.15568e-224	up
LOC_Os03g37490	784.088	1331.16	237.016	-2.49152	2.78818e-225	3.75895e-224	down
LOC_Os08g15500	1027.97	1679.93	376.01	-2.16081	2.8379e-225	3.82389e-224	down
LOC_Os01g16450	594.084	81.5089	1106.66	3.7601	3.47619e-225	4.6814e-224	up
LOC_Os01g55750	927.305	1540.71	313.901	-2.29654	4.05656e-225	5.46001e-224	down
LOC_Os03g31300	2174.71	3246.21	1103.21	-1.55696	5.80865e-225	7.81401e-224	down
LOC_Os03g63310	513.23	956.857	69.6021	-3.78361	6.09065e-225	8.18891e-224	down
LOC_Os01g16130	1303.58	2063.74	543.416	-1.92652	7.22526e-225	9.70912e-224	down
LOC_Os03g08360	2378.62	4750.05	7.19567	-9.34596	7.32573e-225	9.83878e-224	down
LOC_Os12g25200	690.997	1226.52	155.47	-2.98067	7.63369e-225	1.02468e-223	down
LOC_Os06g40050	2317.45	3443.81	1191.08	-1.53251	8.95045e-225	1.20078e-223	down
LOC_Os04g51310	1000.43	1677.85	323.017	-2.3781	9.69724e-225	1.30026e-223	down
LOC_Os03g50130	1376.28	528.282	2224.28	2.07963	9.95752e-225	1.33444e-223	up
LOC_Os09g39190	606.249	50.5918	1161.91	4.51597	1.05961e-224	1.41924e-223	up
LOC_Os10g32810	797.524	1345.92	249.127	-2.43429	1.19324e-224	1.59737e-223	down
LOC_Os03g53020	755.967	198.337	1313.6	2.7272	2.21352e-224	2.96158e-223	up
LOC_Os02g52990	672.37	137.273	1207.47	3.1448	3.84244e-224	5.13823e-223	up
LOC_Os01g13390	1454.64	2899.46	9.81563	-8.19247	5.02771e-224	6.71956e-223	down
LOC_Os11g29230	497.96	945.195	50.7259	-4.22713	8.00696e-224	1.06956e-222	down
LOC_Os09g34340	758.831	1380.85	136.81	-3.33665	8.94217e-224	1.19384e-222	down
LOC_Os12g07650	998.371	1656.92	339.825	-2.28759	1.25679e-223	1.67684e-222	down
LOC_Os06g13720	967.533	291.317	1643.75	2.49555	1.25736e-223	1.67684e-222	up
LOC_Os09g09790	579.632	1034.5	124.765	-3.05045	1.48353e-223	1.97741e-222	down
LOC_Os03g13380	5874.74	3666.87	8082.6	1.1398	1.50596e-223	2.00622e-222	up
LOC_Os01g43330	2730.42	4086.25	1374.59	-1.57221	1.57444e-223	2.09631e-222	down
LOC_Os10g21560	1786.32	760.006	2812.64	1.88466	2.11328e-223	2.81224e-222	up
LOC_Os04g57020	771.57	1332.89	210.255	-2.66059	2.32964e-223	3.09849e-222	down
LOC_Os01g61400	1774.84	2711.35	838.322	-1.69345	2.69287e-223	3.57967e-222	down
LOC_Os03g04680	507.185	977.293	37.0762	-4.72249	3.42436e-223	4.54962e-222	down
LOC_Os03g58100	562.258	1100.64	23.8724	-5.5244	4.54923e-223	6.04087e-222	down
LOC_Os06g07200	1319.58	528.719	2110.45	1.99611	1.00534e-222	1.33426e-221	up
LOC_Os06g03560	614.241	1092.89	135.592	-3.00738	1.0185e-222	1.35101e-221	down
LOC_Os09g32320	735.119	162.897	1307.34	2.99854	1.43054e-222	1.89654e-221	up
LOC_Os01g19260	773.272	25.2821	1521.26	5.91406	1.49339e-222	1.97881e-221	up
LOC_Os04g35190	1997.16	3029.03	965.288	-1.64964	2.53591e-222	3.35839e-221	down
LOC_Os01g09830	756.839	165.505	1348.17	3.03738	2.64765e-222	3.50448e-221	up
LOC_Os01g73580	2066.88	3077.84	1055.91	-1.54314	2.75079e-222	3.63905e-221	down
LOC_Os06g04480	617.59	1109.42	125.761	-3.14348	6.63539e-222	8.77334e-221	down
LOC_Os03g52040	541.319	990.557	92.0801	-3.42094	9.85541e-222	1.30239e-220	down
LOC_Os07g14350	541.762	993.717	89.8072	-3.47043	1.15426e-221	1.52454e-220	down
LOC_Os04g31010	674.668	1179.36	169.974	-2.79163	1.44686e-221	1.90998e-220	down
LOC_Os05g05830	2725.26	4015.75	1434.78	-1.48549	1.44901e-221	1.9118e-220	down
LOC_Os04g33940	617.405	1090.79	144.019	-2.91888	4.4299e-221	5.8416e-220	down
LOC_Os08g37700	483.031	909.737	56.3259	-4.01488	9.27725e-221	1.22272e-219	down
LOC_Os07g07920	698.292	159.713	1236.87	2.96415	1.02759e-220	1.35362e-219	up
LOC_Os03g58890	569.925	60.2667	1079.58	4.17136	1.39066e-220	1.8309e-219	up
LOC_Os12g04270	880.162	1468.65	291.679	-2.3325	2.14465e-220	2.82207e-219	down
LOC_Os08g38300	856.184	239.184	1473.18	2.62124	2.64374e-220	3.47696e-219	up
LOC_Os04g26400	579.509	1137.45	21.5652	-5.71779	3.0519e-220	4.01163e-219	down
LOC_Os09g36080	485.685	916.597	54.7721	-4.06269	3.62091e-220	4.75704e-219	down
LOC_Os09g38777	640.204	1130.18	150.232	-2.90917	3.94144e-220	5.17539e-219	down
LOC_Os01g56420	630.685	36.2896	1225.08	5.0967	5.36586e-220	7.04201e-219	up
LOC_Os12g01590	758.791	1284.51	233.073	-2.46139	5.68155e-220	7.45236e-219	down
LOC_Os01g11650	2866.05	1540.14	4191.95	1.44292	7.13995e-220	9.36034e-219	up
LOC_Os04g39840	1283.7	2050.11	517.302	-1.98572	7.15454e-220	9.37449e-219	down
LOC_Os09g25620	597.096	80.8683	1113.32	3.7649	9.31963e-220	1.22049e-218	up
LOC_Os05g07280	770.462	25.178	1515.75	5.9295	1.77012e-219	2.3169e-218	up
LOC_Os10g36000	2219.21	3303.84	1134.57	-1.54285	2.67745e-219	3.50266e-218	down
LOC_Os11g04350	585.137	64.1108	1106.16	4.11094	5.24757e-219	6.86127e-218	up
LOC_Os10g37240	3279.19	4687.13	1871.25	-1.32528	5.9238e-219	7.74135e-218	down
LOC_Os09g36250	2431.24	1222.8	3639.69	1.57061	1.0637e-218	1.38933e-217	up
LOC_Os03g60820	1736.45	2681.17	791.738	-1.75888	1.14545e-218	1.49532e-217	down
LOC_Os09g23110	875.216	1452.8	297.635	-2.2857	1.253e-218	1.63485e-217	down
LOC_Os03g13010	1079.34	1779.01	379.679	-2.22854	2.02371e-218	2.63904e-217	down
LOC_Os10g30560	633.793	109.931	1157.66	3.40405	2.64611e-218	3.44887e-217	up
LOC_Os02g38920	21606.2	13592.2	29620.2	1.12331	3.11711e-218	4.06063e-217	up
LOC_Os02g09750	1028.19	1694.7	361.675	-2.22789	3.47812e-218	4.52852e-217	down
LOC_Os12g25090	596.884	49.8477	1143.92	4.51441	3.9261e-218	5.1091e-217	up
LOC_Os04g32850	2610.13	5213.5	6.77096	-9.6	3.94927e-218	5.13654e-217	down
LOC_Os03g19420	15387.2	8726.82	22047.5	1.33715	4.331e-218	5.63007e-217	up
LOC_Os06g38950	585.51	42.407	1128.61	4.71816	4.50124e-218	5.8483e-217	up
LOC_Os01g49890	1934.69	2929.88	939.5	-1.64028	4.58345e-218	5.95198e-217	down
LOC_Os11g39370	2034.76	3023.27	1046.25	-1.53158	4.81218e-218	6.24572e-217	down
LOC_Os02g49060	826.489	248.275	1404.7	2.50276	5.6485e-218	7.32734e-217	up
LOC_Os04g21320	908.857	1805.19	12.5219	-7.16788	1.08582e-217	1.4078e-216	down
LOC_Os03g45194	645.876	1171.51	120.239	-3.28936	1.19543e-217	1.54911e-216	down
LOC_Os04g55710	4401.9	6476.43	2327.38	-1.47618	1.30352e-217	1.68829e-216	down
LOC_Os12g36194	1345.18	2121.15	569.222	-1.89682	1.47203e-217	1.90555e-216	down
LOC_Os02g35000	561.417	57.4688	1065.37	4.21794	1.88266e-217	2.43583e-216	up
LOC_Os11g05360	709.118	27.3809	1390.86	5.6616	1.89077e-217	2.44504e-216	up
LOC_Os10g41710	763.362	1312.79	213.93	-2.6148	4.6233e-217	5.97548e-216	down
LOC_Os09g24460	781.871	1324.5	239.245	-2.47048	5.12402e-217	6.61918e-216	down
LOC_Os06g33200	649.589	1164.81	134.37	-3.11384	7.06251e-217	9.11853e-216	down
LOC_Os06g12610	836.85	246.332	1427.37	2.53524	7.13113e-217	9.20232e-216	up
LOC_Os10g37330	495.953	952.055	39.8497	-4.57443	9.67094e-217	1.24733e-215	down
LOC_Os11g44430	608.682	37.1551	1180.21	4.97202	1.29685e-216	1.67176e-215	up
LOC_Os05g49590	3365.08	4962.1	1768.06	-1.4891	1.81529e-216	2.33887e-215	down
LOC_Os06g47890	4520.83	6375.73	2665.92	-1.25797	1.83075e-216	2.35755e-215	down
LOC_Os02g05030	2129.27	3200.27	1058.27	-1.59643	3.70515e-216	4.76884e-215	down
LOC_Os07g06940	1065.23	1720.83	409.642	-2.06967	3.82703e-216	4.92315e-215	down
LOC_Os01g59020	490.801	913.449	68.1537	-3.7438	4.44176e-216	5.71097e-215	down
LOC_Os05g36280	555.746	64.9384	1046.55	4.00646	2.3838e-215	3.06336e-214	up
LOC_Os10g03320	526.075	958.715	93.4357	-3.3586	2.83601e-215	3.6426e-214	down
LOC_Os01g67500	1046.93	360.983	1732.89	2.26162	3.44739e-215	4.42555e-214	up
LOC_Os01g73234	1126.6	1820.52	432.683	-2.07401	3.47285e-215	4.45592e-214	down
LOC_Os05g41030	511.925	995.163	28.6867	-5.10519	3.71815e-215	4.76818e-214	down
LOC_Os07g48770	587.697	1056.48	118.916	-3.14671	3.91283e-215	5.01524e-214	down
LOC_Os10g40614	851.795	20.8228	1682.77	6.34425	4.19755e-215	5.3774e-214	up
LOC_Os11g03484	478.944	896.507	61.3815	-3.86334	5.72784e-215	7.33401e-214	down
LOC_Os07g45570	3296.55	4688.5	1904.59	-1.29946	6.56887e-215	8.40652e-214	down
LOC_Os09g33820	1512.88	2350.27	675.489	-1.7991	7.11721e-215	9.10355e-214	down
LOC_Os05g07740	581.275	93.1532	1069.4	3.51811	7.3961e-215	9.45537e-214	up
LOC_Os05g35460	2800	1420.82	4179.19	1.55443	1.10523e-214	1.41222e-213	up
LOC_Os08g22149	1157.03	1834.51	479.549	-1.93524	2.51174e-214	3.20776e-213	down
LOC_Os03g47050	511.513	949.904	73.1212	-3.70438	2.58396e-214	3.29829e-213	down
LOC_Os03g56670	3879.82	7753.61	6.02439	-10.3057	2.64898e-214	3.37953e-213	down
LOC_Os03g14510	796.209	1341.73	250.689	-2.42014	2.9229e-214	3.72707e-213	down
LOC_Os01g72350	1132.35	1814.57	450.131	-2.00935	3.735e-214	4.76016e-213	down
LOC_Os10g34350	674.508	1172.84	176.179	-2.736	3.83009e-214	4.87882e-213	down
LOC_Os03g16860	6916.25	4139.54	9692.97	1.22761	4.85148e-214	6.17671e-213	up
LOC_Os02g34560	2981.25	1641.41	4321.09	1.39522	5.00108e-214	6.36389e-213	up
LOC_Os08g07390	1050.35	1691.13	409.57	-2.04703	7.13941e-214	9.08024e-213	down
LOC_Os06g14740	3805.63	5386.13	2225.13	-1.27465	1.45438e-213	1.8488e-212	down
LOC_Os04g33280	3288.02	4735.91	1840.13	-1.36359	1.92964e-213	2.45169e-212	down
LOC_Os10g42770	469.355	900.025	38.6855	-4.53398	2.38498e-213	3.02866e-212	down
LOC_Os07g47990	762.74	166.502	1358.98	3.04094	2.88853e-213	3.66622e-212	up
LOC_Os04g28990	945.94	279.937	1611.94	2.52573	3.02901e-213	3.84255e-212	up
LOC_Os07g09190	610.974	116.994	1104.95	3.23861	4.2543e-213	5.39417e-212	up
LOC_Os05g41670	728.546	193.031	1264.06	2.7188	1.4344e-212	1.81779e-211	up
LOC_Os01g49219	935.535	1528.54	342.526	-2.15806	1.56365e-212	1.98057e-211	down
LOC_Os11g05380	554.086	77.4048	1030.77	3.73303	2.18152e-212	2.76177e-211	up
LOC_Os03g09170	647.878	139.769	1155.99	3.05472	2.87571e-212	3.63874e-211	up
LOC_Os06g50920	640.96	139.07	1142.85	3.03091	4.21181e-212	5.32662e-211	up
LOC_Os11g02100	624.315	32.9604	1215.67	5.21312	4.54876e-212	5.74982e-211	up
LOC_Os08g31580	2752.62	1474.96	4030.29	1.45137	5.11007e-212	6.45604e-211	up
LOC_Os07g26660	660.147	29.7253	1290.57	5.45616	1.14018e-211	1.43976e-210	up
LOC_Os06g23290	6934.63	4486.58	9382.69	1.06406	1.33412e-211	1.6838e-210	up
LOC_Os08g45190	2568.51	5130.67	6.35867	-9.6417	1.68292e-211	2.12293e-210	down
LOC_Os03g63074	632.819	1101.36	164.278	-2.74706	1.75398e-211	2.21145e-210	down
LOC_Os03g12840	1445.69	2240.01	651.372	-1.78156	2.5045e-211	3.15611e-210	down
LOC_Os12g10330	558.516	71.3999	1045.63	3.86963	4.22871e-211	5.32619e-210	up
LOC_Os01g01520	800.338	228.643	1372.03	2.58585	4.58457e-211	5.77147e-210	up
LOC_Os09g24620	471.776	882.929	60.6223	-3.86644	4.95569e-211	6.23549e-210	down
LOC_Os09g23350	1735.27	806.956	2663.59	1.7219	9.10446e-211	1.14498e-209	up
LOC_Os01g51710	713.554	1221.61	205.502	-2.57428	1.20851e-210	1.51906e-209	down
LOC_Os01g43100	653.691	1134.52	172.859	-2.7146	1.34145e-210	1.6853e-209	down
LOC_Os03g19590	2575.73	3720.09	1431.37	-1.37764	2.99205e-210	3.75709e-209	down
LOC_Os01g39330	588.013	104.798	1071.23	3.35492	3.7534e-210	4.71071e-209	up
LOC_Os02g48640	1443.3	624.347	2262.26	1.8605	3.91109e-210	4.90613e-209	up
LOC_Os01g19020	3519.81	1779.64	5259.98	1.56534	6.21101e-210	7.78723e-209	up
LOC_Os02g15860	582.136	1043.03	121.245	-3.10542	8.66035e-210	1.08527e-208	down
LOC_Os02g58100	1660.36	3312.81	7.90577	-8.71431	2.1405e-209	2.68099e-208	down
LOC_Os04g54190	1018.96	372.765	1665.15	2.15455	2.61095e-209	3.26858e-208	up
LOC_Os01g48850	681.191	159.2	1203.18	2.91699	3.65705e-209	4.57354e-208	up
LOC_Os10g32348	484.055	923.51	44.6004	-4.37578	8.99902e-209	1.12485e-207	down
LOC_Os04g35060	2811.73	4101.03	1522.44	-1.42868	1.56651e-208	1.95711e-207	down
LOC_Os01g68740	554.579	41.967	1067.19	4.67418	2.10638e-208	2.63026e-207	up
LOC_Os10g25040	601.975	1186.27	17.681	-6.05749	2.21173e-208	2.76042e-207	down
LOC_Os04g42800	1152.37	2295.04	9.69541	-7.89633	2.28489e-208	2.85029e-207	down
LOC_Os03g07370	749.464	1301.58	197.346	-2.72264	2.90532e-208	3.62241e-207	down
LOC_Os01g09510	2856.85	1564.63	4149.06	1.40586	3.63112e-208	4.52507e-207	up
LOC_Os04g41100	4763.73	6585.07	2942.39	-1.16251	4.65224e-208	5.79466e-207	down
LOC_Os01g72260	724.672	1265.63	183.709	-2.78239	8.08123e-208	1.00606e-206	down
LOC_Os09g28630	670.247	1324.55	15.9409	-6.39066	1.02299e-207	1.27292e-206	down
LOC_Os05g03750	460.108	874.017	46.1991	-4.24582	1.15828e-207	1.44053e-206	down
LOC_Os03g25150	2628.43	1175	4081.87	1.79769	1.26563e-207	1.57325e-206	up
LOC_Os05g48760	2982.01	4247.01	1717.01	-1.30611	1.3993e-207	1.73853e-206	down
LOC_Os01g63690	1387.98	515.154	2260.81	2.12743	1.41706e-207	1.75972e-206	up
LOC_Os01g41710	473.832	919.467	28.1974	-5.02117	1.48727e-207	1.84598e-206	down
LOC_Os04g53720	642.289	151.656	1132.92	2.90361	1.79111e-207	2.22198e-206	up
LOC_Os06g07540	5592.55	7739.21	3445.88	-1.16754	2.20981e-207	2.74003e-206	down
LOC_Os02g44080	2583.64	9.09474	5158.18	9.15675	2.6056e-207	3.22916e-206	up
LOC_Os07g03710	849.905	19.1685	1680.64	6.45187	2.63589e-207	3.26506e-206	up
LOC_Os03g50160	639.326	137.091	1141.56	3.07349	2.65111e-207	3.28227e-206	up
LOC_Os03g17120	1283.49	557.376	2009.61	1.85052	7.83513e-207	9.69563e-206	up
LOC_Os04g54310	1089.88	1783.49	396.276	-2.17306	9.14497e-207	1.13108e-205	down
LOC_Os08g33710	2455.87	3593.2	1318.55	-1.44661	1.30894e-206	1.61814e-205	down
[truncated: 10,008 more rows]
