# Supplementary material
Source: Research Square preprint supplement (doi:10.21203/rs.3.rs-9447148/v1)
Supplement: Supplementary file 1 [file 2361862a1fb8b1cad9ffd3ff.pdf]

Table S1 Primers used in this study

| Primers Name | Forward Primer             | Reverse Primer           |
|--------------|----------------------------|--------------------------|
| q-OsATX      | TCTACTTTCCAAACATGGCTGTGG   | TGATCGCCTTGATGCACCTGTC   |
| q-Ossd1      | ATGGTCATCAACATCGGGCAGAC    | TGTGCAGGCAGCTCTTATACCTC  |
| q-OsGA20ox1  | ACTCCAGTTGTTGCTGTCACTC     | TCCTTGAGCTTCCTGCATATCGTC |
| q-OsRMC      | CTGCACACACATCGATCGCTAATC   | TTGCAATGGCAGTGATCGTTAAGC |
| q-WRKY71     | CAAGCCCAAGATCTCCAAGCTC     | TTGGTACCCATCTTTCACCACCAG |
| q-ABA8ox1    | ACGTGGAATACCAAGGGTACCTG    | TGTTGCGGAACAGAGGTAGCAC   |
| q-OsDof12    | TGAGTCAAAGGATGAGGCAAAGGC   | CTGCATGAATGGCAAGCTGCTG   |
| q-OsJAZ7     | CGCGCGAATGCTTCTGATATGC     | CTCAAGGAACCTGTGGAGTGATGC |
| q-OsMBL1     | TGCCCTACACAACACTACACAAGTCG | TCTTCACCAGCGTCATACTCTTCG |
| q-OsCAT2     | CCGGTTGGAACGTACTTCAAGGAG   | GCGTAGTTGGTGATCGTCTTGACC |
| q-PIP2       | TGCATGTGAGGGAGTGTGTGTG     | AATCATGCACCTGGCTGACTGG   |
| q-OsmiR528   | GGCTGTTCTGTGGAAGTTTGCAG    | TTTCTCCTACCGCTGCTGATGC   |
| q-OsIAA11    | AGCAGCTGAAGGAGAGCAATAAGC   | TTGCACGACTCGACGAACATCTC  |
