# Supplementary material
Source: Research Square preprint supplement (doi:10.21203/rs.3.rs-9447148/v1)
Supplement: Supplementary file 2 [file 210e3bc46495c7b8f8581230.xlsx]

## Sheet: Sheet1
Table S6 DAMs identified between control conditions and salt conditions in shoot(CK_Shoot vs. Salt_Shoot)
Index	Compounds	Class I	Class II	Formula	Level	score	CAS	Salt_Shoot_1	Salt_Shoot_2	Salt_Shoot_3	CK_Shoot_1	CK_Shoot_2	CK_Shoot_3	VIP	P-value	FDR	Fold_Change	Log2FC	Type
MW0111229	Octadecylamine	Alcohol and amines	Amines	C18H39N	2	0.9708	124-30-1	21511.8	15293.4	3660.87	21466.4	12662.4	7874.01	0.224333	0.941886	0.967317	0.963415	-0.05377	insig
MEDL00392	1-(9Z-octadecenoyl)-sn-glycero-3-phosphocholine	Lipids	LPC	C26H52NO7P	2	0.9481	19420-56-5	11549.6	29722.8	6959.59	4949.18	4805.84	42917.8	0.242776	0.924725	0.959467	0.915692	-0.127066	insig
MEDN1677	2'-Adenylic acid	Nucleotides and derivatives	Nucleotides and derivatives	C10H14N5O7P	2	0.9467	130-49-4	3254.42	509.57	3816.95	164924	159094	167379	1.40187	2.85929e-05	0.00265935	0.0154273	-6.01837	down
MW0054292	Lauroyl diethanolamide	FA	Others	C16H33NO3	2	0.9387	120-40-1	59326.6	50373.1	32540.8	60614.3	38273.4	62192.4	0.386893	0.599536	0.739471	0.883042	-0.179447	insig
MEDL02701	2,4,6-Trihydroxybenzoic acid	Phenolic acids	Phenolic acids	C7H6O5	2	0.9374	83-30-7	78405.3	50096.8	86382.9	66950.5	69481.1	67921.6	0.102561	0.780276	0.867403	1.05154	0.0724993	insig
MW0127974	N-Feruloyl dopamine, trans-	Alkaloids	Alkaloids	C18H19NO5	2	0.9329	142350-99-0	3413.87	2256.81	577.21	4780.26	5472.01	6338.83	1.08399	0.0330684	0.117057	0.376581	-1.40897	down
MW0110882	Adrenoyl ethanolamide	Alcohol and amines	Amines	C24H41NO2	2	0.93	150314-35-5	264.89	483.22	833.77	484.96	3747.4	3768.06	0.984752	0.186434	0.365614	0.197725	-2.33844	insig
MW0130180	6,7,3',4'-Tetrahydroxyflavone	Flavonoids	Flavones	C15H10O6	2	0.9298	92915-82-7	12568.2	196042	11797.9	7044.94	246045	128529	0.336585	0.592022	0.732893	0.577559	-0.791959	insig
MW0168897	Ergocalciferol	Others	Vitamin	C28H44O	2	0.9269	50-14-6	9781.96	15983.7	723.55	85.1	6333.29	184.35	0.849307	0.273165	0.462954	4.01185	2.00427	insig
MW0016133	Betamethasone 9,11-Epoxide	Benzene and substituted derivatives	Phenolic acids	C22H28O5	2	0.9263	981-34-0 | 14622-47-0	35528.3	25311.8	29015.1	9538.48	6422.11	5369.66	1.40883	0.00837761	0.0499682	4.21257	2.0747	up
MW0104181	3-Oxoglutaric acid	Organic acids	Organic acids	C5H6O5	2	0.9263	542-05-2	95222.4	90639.2	110085	154815	144477	120395	1.27992	0.0356021	0.122795	0.70516	-0.503978	insig
MW0103376	3'-O-Methylguanosine	Nucleotides and derivatives	Nucleotides and derivatives	C11H15N5O5	2	0.9204	10300-27-3	4653.74	6241.13	11694.5	1881.21	2956.56	2728.49	1.25662	0.140303	0.303163	2.98554	1.57799	up
MW0144984	Alpha-Maltose	Others	Saccharides	C12H22O11	2	0.9156	9005-84-9	1.96456e+06	1.17011e+06	1.89952e+06	1.52737e+06	1.35122e+06	1.25898e+06	0.64162	0.362536	0.549745	1.2167	0.282978	insig
MW0054460	Lutein	Others	Vitamin	C40H56O2	2	0.9142	127-40-2	1.07465e+06	631939	571611	665636	390144	141557	0.907677	0.175779	0.351873	1.90272	0.928064	insig
MW0000275	Harman	Alkaloids	Alkaloids	C12H10N2	2	0.914	486-84-0	62378.1	60442.3	61972.4	55336.6	34160.5	46681.2	1.09971	0.117487	0.271934	1.35699	0.440412	insig
MW0114649	Isomaltose	Others	Saccharides	C12H22O11	2	0.9127	499-40-1	41351.8	13429.1	77312.1	71265.7	48464.9	19771.5	0.17589	0.922383	0.958226	0.946889	-0.0787324	insig
MW0111826	1-Kestose	Others	Saccharides	C18H32O16	2	0.9114	470-69-9	289669	330534	202698	310661	285011	296192	0.46764	0.606482	0.744621	0.922675	-0.116105	insig
MW0168272	Oxycanthine	Lignans and Coumarins	Lignans	C37H40N2O6	2	0.9065	548-40-3	63221.9	39755.3	61981.4	89740.8	25861.2	77268.4	0.0809111	0.691791	0.803799	0.855282	-0.225527	insig
MW0054371	Linoelaidic acid	Lipids	Free fatty acids	C18H32O2	2	0.906	506-21-8	10426.7	7036.37	8310.14	12052.8	4335.96	14281.6	0.125463	0.649875	0.777647	0.840328	-0.250975	insig
MW0130165	5,7,3',4'-Tetrahydroxy-6,8-dimethoxyflavone	Flavonoids	Flavones	C17H14O8	2	0.9031	57093-50-2	67234.3	33900.9	67875.9	74261.3	71548.5	46110.8	0.390269	0.62437	0.758043	0.880631	-0.183391	insig
MEDN0838	N-Methyl-D-aspartic acid	Amino acids and derivatives	Amino acids and derivatives	C5H9NO4	2	0.9008	6384-92-5	1.01118e+06	1.18467e+06	1.16068e+06	1.30387e+06	1.24345e+06	1.28351e+06	1.15679	0.0885448	0.225672	0.876189	-0.190685	insig
MW0014451	4-Dihydroboldenone	Others	Ketone compounds	C19H28O2	2	0.8991	10529-96-1	17596.1	16782.6	16295.3	466679	418518	408533	1.45833	0.00186407	0.0200615	0.039169	-4.67414	down
MW0005951	Acetyleugenol	Phenolic acids	Phenolic acids	C12H14O3	2	0.8987	93-28-7	194276	209284	184851	132791	117849	110554	1.4106	0.00147435	0.0176663	1.62907	0.70405	insig
MW0005300	4-Phenyl-2-butanol	Benzene and substituted derivatives	Benzene and substituted derivatives	C10H14O	2	0.8971	2344-70-9	8427.73	9411.54	8582.31	23631.2	12662.7	17911.1	1.28667	0.0984253	0.240993	0.487438	-1.03671	down
MW0149263	Levoleucovorin	Organic acids	Organic acids	C20H23N7O7	2	0.896	68538-85-2 | 58-05-9	1.56819e+06	1.62391e+06	1.68946e+06	1.33273e+06	1.3759e+06	1.41265e+06	1.3882	0.00596724	0.0405218	1.18448	0.24425	insig
MEDP0338	LysoPC 16:0	Lipids	LPC	C24H50NO7P	2	0.8892	17364-16-8	52409.8	51350.8	72096.6	128698	145118	54064.9	0.934188	0.207574	0.392077	0.536345	-0.898766	insig
MW0006042	2-Hydroxy-6-pentadecylbenzoic acid	Benzene and substituted derivatives	Benzene and substituted derivatives	C22H36O3	2	0.8889	16611-84-0	110098	130069	128947	114532	128804	138314	0.307584	0.681977	0.796792	0.967151	-0.0481875	insig
MW0053722	Glycerol trihexanoate	GL	TG	C21H38O6	2	0.887	621-70-5	1807.53	2892.31	6377.49	3638.13	4070.78	2271.11	0.00552101	0.823133	0.89554	1.10995	0.150496	insig
MW0014506	4-Hydroxyretinoic acid	Organic acids	Organic acids	C20H28O3	2	0.8864	66592-72-1	189.49	247.54	419.29	976.48	1239.12	1158.3	1.38017	0.00135214	0.0167749	0.253807	-1.9782	down
MW0115743	11-Hydroxytetrahydrocannabinol	Others	Others	C21H30O3	2	0.8828	36557-05-8	624.08	646.2	687.1	1967.7	3112.69	326.72	0.630101	0.290848	0.480645	0.362001	-1.46593	insig
MW0130967	Koparin	Others	Ketone compounds	C16H12O6	2	0.8793	65048-75-1	1762.18	2753.43	1878.46	1330.61	284.56	112208	0.20599	0.436631	0.60938	0.0561752	-4.15392	insig
MEDN0851	Indolepyruvate	Organic acids	Organic acids	C11H9NO3	2	0.8786	392-12-1	219765	227782	231185	227690	227718	238969	0.669559	0.361149	0.548664	0.977469	-0.0328777	insig
MW0103561	Flavin mononucleotide	Nucleotides and derivatives	Nucleotides and derivatives	C17H21N4O9P	2	0.8782	146-17-8	9958.78	15838.8	13128.7	7417.31	11293	13237.7	0.625899	0.389322	0.573962	1.21843	0.285019	insig
MW0052460	Docosatrienoic acid	Lipids	Free fatty acids	C22H38O2	2	0.8777	28845-86-5	2315.98	3527.28	2534.6	30109.3	32962.8	41606.7	1.44741	0.0107097	0.0575827	0.080034	-3.64324	down
MW0014995	6beta-Hydroxymethandrostenolone	Others	Ketone compounds	C20H28O3	2	0.8727	33526-41-9	6049.98	3191.08	4724.29	128123	111957	121060	1.44925	0.0012282	0.0161833	0.0386703	-4.69263	down
Lmhp002001	Val-Phe	Amino acids and derivatives	Amino acids and derivatives	C14H20N2O3	2	0.8717	3918-92-1	641	1019.08	318.75	1609.54	1169.85	1021.19	1.04088	0.0878437	0.22431	0.520665	-0.941572	insig
MW0014839	5(S)-Hydroperoxyeicosatetraenoic acid	Lipids	Free fatty acids	C20H32O4	2	0.8689	71774-08-8	28693.7	31577.8	36329.7	58078.2	45032	24650.6	0.571467	0.398267	0.580975	0.756109	-0.403334	insig
MW0153776	Met-His	Amino acids and derivatives	Amino acids and derivatives	C11H18N4O3S	2	0.8553	14486-12-5	50108.3	52631.6	51984.2	73345.3	66501.2	68735.4	1.4257	0.00644105	0.0423609	0.74179	-0.430917	insig
MW0149468	Ganoderic acid H	Lipids	Free fatty acids	C32H44O9	2	0.8549	98665-19-1	89337.3	127814	113128	273569	249510	265606	1.41649	0.000792719	0.0130127	0.418772	-1.25576	down
MW0136963	7-Ethoxy-4-methylcoumarin	Benzene and substituted derivatives	Benzene and substituted derivatives	C12H12O3	2	0.8543	87-05-8	481.82	35559.1	51501.9	329896	263048	297797	1.09775	0.000537088	0.0108941	0.0982809	-3.34694	down
MW0011597	(R)-ar-Turmerone	Others	Ketone compounds	C15H20O	2	0.8541	532-65-0	245.41	522.57	1404.57	2906.25	1646.86	2437.23	1.1584	0.0340828	0.119705	0.310793	-1.68597	down
MW0112859	3-Methyl-1-(2,4,6-trihydroxyphenyl)-1-butanone	Others	Ketone compounds	C11H14O4	2	0.8492	26103-97-9	15744	40941.4	37572.4	27407.9	11841.4	18572.2	0.745817	0.269276	0.458496	1.63015	0.705008	insig
Zmhn002301	4-O-beta-D-glucosyl-4-coumaric acid	Organic acids	Organic acids	C15H18O8	2	0.8491	14364-05-7	57840.5	71604.8	12080.9	63891.5	47250.7	66842.9	0.549314	0.576987	0.720921	0.795157	-0.330688	insig
MW0000973	Gingerol	Phenolic acids	Phenolic acids	C17H26O4	2	0.8426	23513-14-6 | 1391-73-7	264443	249232	244716	259285	253661	255827	0.407117	0.625732	0.759011	0.986497	-0.0196141	insig
MW0137821	Cyanidin 3-sambubioside 5-glucoside	Flavonoids	Anthocyanidins	C32H39O20+	2	0.8376	73036-94-9	143350	132306	142438	182254	173435	320522	1.08346	0.212031	0.397262	0.61829	-0.693645	insig
MW0126137	Picrotin	Heterocyclic compounds	Heterocyclic compounds	C15H18O7	2	0.8276	21416-53-5	121983	115221	62846.7	148699	39505.7	47994.2	0.553577	0.62881	0.761647	1.27033	0.345203	insig
MW0000241	3-Hydroxy-8-methyl-8-azabicyclo[3.2.1]octane-2-carboxylic acid	Alkaloids	Tropan alkaloids	C9H15NO3	2	0.8271	481-37-8	31254.7	29381	27878.7	77657.1	77966.6	70091.7	1.45132	0.00111619	0.0151023	0.392151	-1.35052	down
MEDP2286	Celastrol	Benzene and substituted derivatives	Benzene and substituted derivatives	C29H38O4	2	0.8234	34157-83-0	57587.8	58456.2	50157.8	104383	136128	110309	1.41401	0.0184935	0.0807864	0.473752	-1.0778	down
MEDTN00717	4-Oxoretinoic acid	Organic acids	Organic acids	C20H26O3	2	0.8224	64907-22-8	6450.43	6133.26	2357.47	361149	341068	375689	1.44269	0.000668448	0.0119043	0.0138613	-6.17279	down
MW0009433	Phenyltoloxamine	Benzene and substituted derivatives	Benzene and substituted derivatives	C17H21NO	2	0.819	92-12-6	480.54	385.39	291.47	35.71	608.46	57.13	0.841939	0.507255	0.665093	1.65036	0.722784	insig
MW0125248	Myristicin	Lignans and Coumarins	Lignans	C11H12O3	2	0.8123	607-91-0	2791.5	1039.9	1337.82	6371.32	17387.4	7767.9	1.31851	0.123267	0.280368	0.163964	-2.60855	down
MW0055023	alpha-Glyceryl linoleate	GL	MG	C21H38O4	2	0.8079	67968-46-1	230733	85914.1	55186.3	149394	134986	144910	0.525538	0.757614	0.853752	0.866159	-0.207297	insig
MW0115022	Nigerose	Others	Saccharides	C12H22O11	2	0.8048	497-48-3	115764	423445	241689	82655.4	92287.2	19427.7	1.10688	0.153126	0.320623	4.01758	2.00633	up
MW0056883	Colfosceril palmitate	GP	PC	C40H80NO8P	2	0.799	63-89-8	42414.7	40560.3	40514.1	49821.6	16384.1	19017.4	0.85081	0.356626	0.543225	1.44901	0.535068	insig
MW0132722	Rhamnazin	Flavonoids	Flavonols	C17H14O7	2	0.7986	552-54-5	17757.7	11835	9343.81	22502.7	24607.7	23544	1.25102	0.0446957	0.141012	0.551085	-0.859654	insig
MW0054123	Isopimaric acid	Terpenoids	Ditepenoids	C20H30O2	2	0.7889	5835-26-7	1208.66	1274.4	1050.28	89692.7	53153.5	52742.4	1.45267	0.0347099	0.121069	0.0180652	-5.79065	down
MW0107840	Leucylproline	Amino acids and derivatives	Amino acids and derivatives	C11H20N2O3	2	0.7871	6403-35-6	253495	385283	248092	394615	370803	395223	1.0321	0.175421	0.35154	0.764121	-0.388128	insig
MW0109739	S-nitrosoglutathione	Amino acids and derivatives	Amino acids and derivatives	C10H16N4O7S	2	0.7867	57564-91-7	51766.9	48959.3	53160.9	33324	35146.8	36897.6	1.43023	0.000645207	0.0117184	1.46047	0.54643	insig
MW0104699	Spermidic acid	Organic acids	Organic acids	C7H13NO4	2	0.7856	4386-03-2	163060	106263	172209	137204	95565.5	141820	0.539211	0.433063	0.60671	1.17871	0.23721	insig
MW0014140	2-Hydroxy-3-isopropylsuccinic acid	Organic acids	Organic acids	C7H12O5	2	0.7819	16048-89-8	100336	102147	99945	89691.2	82783.9	87042.2	1.39096	0.0123024	0.0621594	1.16535	0.22076	insig
MW0015857	Methyl arachidonate	FA	Others	C21H34O2	2	0.7812	2566-89-4	105501	98648.3	103306	88977.7	82173.9	80770.1	1.37341	0.00537975	0.0378554	1.22044	0.287402	insig
MW0061067	Perillaldehyde	Heterocyclic compounds	Heterocyclic compounds	C10H14O	2	0.7812	2111-75-3	40655.6	21587.9	42884.3	24294.4	12045.2	5558.4	1.07584	0.0754215	0.202059	2.50913	1.32719	up
MEDP2104	3-Aminoquinoline	Heterocyclic compounds	Heterocyclic compounds	C9H8N2	2	0.7811	580-17-6	28339.3	27955	24147.8	32057.2	31156.4	32600.5	1.25257	0.0511198	0.154741	0.839565	-0.252287	insig
MW0011930	1,2-Dimyristoyl-sn-glycero-3-phosphocholine	GP	PC	C36H72NO8P	2	0.781	18194-24-6	3324.86	4341.35	2939.13	5285.26	1978.64	569.94	0.652276	0.582558	0.726082	1.35379	0.436999	insig
MW0106984	Glutaconic acid	Organic acids	Organic acids	C5H6O4	2	0.7808	1724-02-3	108280	65676.1	78167.9	62186.3	54363	56672.5	1.10886	0.169305	0.343333	1.4555	0.54151	insig
MW0055340	N-(9Z-octadecenoyl)-sphing-4-enine-1-phosphocholine	SL	SM	C41H81N2O6P	2	0.7797	108392-10-5	53721.5	46158.8	47278.1	53525.6	56480.7	53246.5	1.05258	0.136907	0.298062	0.901414	-0.149738	insig
MW0130123	Dihydroquercetin	Others	Ketone compounds	C15H12O7	2	0.7795	98006-93-0 | 215257-15-1 | 5117-01-1	144312	137030	139748	197734	194460	206955	1.44563	0.000617296	0.0115765	0.702812	-0.508789	insig
mws0895	Genistin	Flavonoids	Isoflavones	C21H20O10	2	0.7788	529-59-9	28131.5	33717.8	30944.9	35918.1	43172.1	30032.8	0.801316	0.288073	0.477602	0.850363	-0.233848	insig
MEDL02176	6-Methylcoumarin	Lignans and Coumarins	Coumarins	C10H8O2	2	0.7784	92-48-8	260138	84398.2	149127	101083	119405	103630	0.639059	0.385569	0.57113	1.5231	0.60701	insig
MW0116509	1-(Hydroxymethyl)-5,5-dimethyl-2,4-imidazolidinedione	Others	Ketone compounds	C6H10N2O3	2	0.7773	116-25-6	167437	132913	173918	186280	159980	117599	0.150726	0.891956	0.939717	1.02244	0.0320109	insig
MW0107946	Prolylproline	Amino acids and derivatives	Amino acids and derivatives	C10H16N2O3	2	0.7771	20488-28-2 | 99265-53-9	115360	117049	95554.6	304204	312724	281933	1.44423	0.000128594	0.00540732	0.364865	-1.45456	down
MEDTP02665	2-Aminoheptanedioic acid	Organic acids	Organic acids	C7H13NO4	2	0.777	3721-85-5	162887	149509	168112	163947	166023	166544	0.631789	0.437574	0.610484	0.967762	-0.0472761	insig
MW0124226	Garcinone D	Flavonoids	Other Flavonoids	C24H28O7	2	0.7765	107390-08-9	507.98	699.31	395.09	834.94	1285.99	183.43	0.133916	0.545487	0.695646	0.695369	-0.52415	insig
MEDN0657	D-Xylulose 5-phosphate	Others	Saccharides	C5H11O8P	2	0.7764	4212-65-1	15200.9	16390.4	1156.32	1040.46	841.63	3951.28	0.867559	0.204366	0.388071	5.61383	2.48899	insig
MW0052734	Ethyl octanoate	Others	Lactones	C10H20O2	2	0.7759	106-32-1	82082.9	82479	85086.7	152450	141749	132819	1.44181	0.00776107	0.047775	0.584634	-0.774395	insig
MW0130831	Flavokawain b	Flavonoids	Chalcones	C17H16O4	2	0.7756	1775-97-9	2224.48	5482.54	1871.94	3215.62	7553.01	1490.98	0.193514	0.701101	0.810215	0.781343	-0.355972	insig
MW0124466	Isoeugenitol	Heterocyclic compounds	Heterocyclic compounds	C11H10O4	2	0.7749	479-06-1	28477.5	14342.9	14663.7	13692.2	14720.2	10903	0.827815	0.322271	0.509295	1.46213	0.548068	insig
MW0106445	Dihydromethysticin	Benzene and substituted derivatives	Benzene and substituted derivatives	C15H16O5	2	0.7741	19902-91-1	9319.64	8168.23	9100.72	19614.2	18515.6	15094	1.41242	0.0175756	0.0786255	0.499563	-1.00126	down
MW0112702	3',4'-Dimethoxyacetophenone	Others	Ketone compounds	C10H12O3	2	0.7736	1131-62-0	147465	148495	153104	109501	112455	105072	1.44397	0.000162166	0.00583797	1.37316	0.457504	insig
MW0000731	(4-Hydroxy-3-methoxyphenyl)ethanol	Phenolic acids	Phenolic acids	C9H12O3	2	0.7729	2380-78-1	2855.96	8969.15	6677.01	17383.8	21269.6	11373.2	1.17858	0.0460834	0.143703	0.369846	-1.435	down
MW0006078	Benzyl alcohol	Benzene and substituted derivatives	Benzene and substituted derivatives	C7H8O	2	0.7713	100-51-6	83613.9	79576.1	117910	108775	107501	87728.7	0.438355	0.6204	0.755041	0.924657	-0.11301	insig
MW0105204	4-Carboxyphenylglycine	Amino acids and derivatives	Amino acids and derivatives	C9H9NO4	2	0.7706	7292-81-1	9005.19	14987.3	7214.78	9578.11	5315.61	14112	0.205447	0.842466	0.906479	1.0759	0.105545	insig
MEDP1775	Lipoamide	Alcohol and amines	Amines	C8H15NOS2	2	0.7695	940-69-2	3078.44	33.19	1977.31	2541.18	3755.3	38.72	0.0715669	0.783599	0.869055	0.80328	-0.316025	insig
MW0106308	Cystathionine	Amino acids and derivatives	Amino acids and derivatives	C7H14N2O4S	2	0.7689	61135-95-3	147.83	177.02	129.66	895.82	758.44	618.22	1.43718	0.0149154	0.0697669	0.200006	-2.32188	down
MW0135191	6',7'-Dihydroxybergamottin	Lignans and Coumarins	Coumarins	C21H24O6	2	0.7689	145414-76-2 | 71339-34-9	13973.2	9163.13	13773.1	13754.9	12894.4	14672.7	0.601826	0.452937	0.623684	0.893212	-0.162925	insig
MW0124675	Limonene-1,2-epoxide	Others	Ketone compounds	C10H16O	2	0.7688	203719-54-4	1.13901e+06	1.36984e+06	1.3098e+06	1.1191e+06	1.224e+06	18046.8	0.681688	0.334255	0.520756	1.61729	0.693575	insig
MW0013469	3-Carboxy-4-methyl-5-propyl-2-furanpropionic acid	Organic acids	Organic acids	C12H16O5	2	0.7686	86879-39-2	2.96634e+06	3.21409e+06	2.95303e+06	2.58594e+06	2.46297e+06	2.44851e+06	1.3855	0.0107621	0.0575827	1.21821	0.284767	insig
MEDN1036	Hydroxytyrosol	Phenolic acids	Phenolic acids	C8H10O3	2	0.7675	10597-60-1	43702	14347.5	23133.9	91737.8	85050.8	92472.5	1.3064	0.0137913	0.0666338	0.301505	-1.72975	down
MEDP1554	Ethyl salicylate	Phenolic acids	Phenolic acids	C9H10O3	2	0.7671	118-61-6	159940	163807	156586	182588	185656	172531	1.33771	0.0200989	0.0848228	0.888229	-0.170996	insig
MW0105748	Arg-Ser	Amino acids and derivatives	Amino acids and derivatives	C9H19N5O4	2	0.7669	70921-62-9	4995.41	5144.3	7089.89	9134.27	6111.48	9599.04	1.02612	0.133489	0.293631	0.693489	-0.528054	insig
MW0056747	Palmitoyl Serinol	Lipids	Free fatty acids	C19H39NO3	2	0.7632	126127-31-9	262.45	58707.1	58.32	2021.75	65.5	53504.5	0.174183	0.967261	0.98201	1.06181	0.0865268	insig
MEDP1015	5,6-Dihydroxyindole-2-carboxylic acid	Alkaloids	Plumerane	C9H7NO4	2	0.7631	4790-08-3	2633.1	5855.88	3958.34	29937.3	32606	29904.9	1.42303	3.32943e-05	0.00281462	0.134641	-2.89281	down
MW0137551	Caffeyl alcohol	Phenolic acids	Phenolic acids	C9H10O3	2	0.7631	3598-26-3 | 272785-02-1	26238.2	27139.7	14394.6	18510.9	16978.2	12160.7	0.81882	0.240537	0.426811	1.4223	0.50823	insig
MW0110241	Tyr-Asp	Amino acids and derivatives	Amino acids and derivatives	C13H16N2O6	2	0.7628	87085-11-8	1715.63	1680.81	4920.46	3709.66	3077.69	917.62	0.130153	0.88897	0.93806	1.07942	0.110257	insig
MEDL00355	Glu-Tyr	Amino acids and derivatives	Amino acids and derivatives	C14H18N2O6	2	0.7622	3422-39-7	40174.2	86991.9	67258.3	78126.5	94748.3	66807.5	0.651179	0.405135	0.586536	0.811176	-0.301914	insig
MW0148113	Cys-Tyr	Amino acids and derivatives	Amino acids and derivatives	C12H16N2O4S	2	0.7621	1089-23-2	1006.9	403.11	1448.02	6432.61	8864.77	6432.86	1.36913	0.009109	0.0522463	0.131523	-2.92661	down
MW0105414	Acetoacetic acid	Organic acids	Organic acids	C4H6O3	2	0.7617	541-50-4	93624.2	82851	108409	106494	107169	124311	0.999522	0.13765	0.299032	0.842917	-0.246537	insig
MEDN1016	Aminohippuric acid	Amino acids and derivatives	Amino acids and derivatives	C9H10N2O3	2	0.7614	61-78-9	20459.9	20615.4	21612.2	69491.5	71875	81837.5	1.45394	0.0046512	0.0343473	0.280853	-1.83211	down
MW0005020	Hydroxymethyltolbutamide	Benzene and substituted derivatives	Benzene and substituted derivatives	C12H18N2O4S	2	0.7614	1185112-19-9	17500.8	24078.7	24063.9	37459.1	43253.1	43583	1.37187	0.00280675	0.025431	0.528124	-0.92105	insig
MW0168536	2-Tridecenal	Others	Others	C13H24O	2	0.7604	7774-82-5	63694.4	52343	6377.56	32513.5	1166.1	833.54	0.901393	0.239725	0.426178	3.54691	1.82656	insig
MW0120587	Isomyristicin	Benzene and substituted derivatives	Benzene and substituted derivatives	C11H12O3	2	0.7603	487-62-7	107648	99280.3	103725	79736.1	84977.1	79013	1.40851	0.002361	0.0228038	1.2746	0.350042	insig
MW0115025	Oxoamide	Alcohol and amines	Amines	C10H12N2O2	2	0.7596	713-05-3	3026.27	4914.87	6340.56	8475.56	5456.06	7031.9	0.924787	0.161665	0.332738	0.681264	-0.553713	insig
MW0106675	Ethyl N-acetyl-L-tyrosinate	Amino acids and derivatives	Amino acids and derivatives	C13H17NO4	2	0.7592	840-97-1	22411.9	29432.5	24030.9	23469.8	24286	4632.41	0.693578	0.347897	0.534981	1.44833	0.53439	insig
MEDN0493	4-Methoxycinnamic acid	Phenolic acids	Phenolic acids	C10H10O3	2	0.759	943-89-5	5439	17008.3	20720.9	12984.1	9390.39	1069.44	0.657185	0.324153	0.51154	1.84134	0.880758	insig
MW0126336	Pyridoxamine phosphate	Organic acids	Organic acids	C8H13N2O5P	2	0.7584	529-96-4	709.47	773.09	665.3	450.98	641.98	1017.07	0.21539	0.946971	0.970561	1.01793	0.0256364	insig
MW0002024	2-(Ethylsulfinylmethyl)phenyl methylcarbamate	Benzene and substituted derivatives	Benzene and substituted derivatives	C11H15NO3S	2	0.758	53380-22-6	459.32	522.24	484.39	158.18	184.58	11.95	1.07469	0.0130949	0.0648632	4.13281	2.04712	up
MEDN0364	1-Octadecanoyl-sn-glycero-3-phosphoethanolamine	Lipids	LPE	C23H48NO7P	2	0.7573	69747-55-3	93.12	730.22	637.41	1389.21	498.74	3313.78	0.888692	0.269511	0.458704	0.28082	-1.83228	insig
MW0107035	Glutethimide	Alcohol and amines	Amines	C13H15NO2	2	0.7571	77-21-4	595.37	177.21	159.64	5266	16315.1	22419.3	1.39195	0.103493	0.249421	0.0211866	-5.5607	down
MW0105643	N-arachidonoylglycine	Amino acids and derivatives	Amino acids and derivatives	C22H35NO3	2	0.7558	179113-91-8	1041.93	2775.5	1784.9	43756.9	41619.3	75551.2	1.43028	0.0418347	0.136135	0.0348128	-4.84424	down
MW0159299	Val-trp	Amino acids and derivatives	Amino acids and derivatives	C16H21N3O3	2	0.7555	24587-37-9	1603.76	3112.66	3377.92	46263.2	49360.1	54014.8	1.44022	0.0013786	0.0169985	0.0540928	-4.20842	down
MW0112074	2-Aminoacetophenone	Others	Ketone compounds	C8H9NO	2	0.7555	613-89-8	211723	237353	195542	304810	290397	224776	1.06547	0.125688	0.284066	0.786135	-0.347151	insig
MW0106958	Glu-Gly	Amino acids and derivatives	Amino acids and derivatives	C7H12N2O5	2	0.7551	13716-89-7	15376.3	16949.2	13497.2	183.19	244.85	242.4	1.45676	0.0043534	0.0332442	68.3472	6.09481	up
MEDN0232	Rhamnose	Others	Saccharides	C6H12O5	2	0.7546	3615-41-6	2194.2	2324.18	230.55	1818.54	2600.57	3330.75	0.706722	0.292847	0.482927	0.612776	-0.706568	insig
MW0013395	1-hexadecanoyl-2-(5Z,8Z,11Z,14Z-eicosatetraenoyl)-sn-glycero-3-phosphoethanolamine	GP	PE	C41H74NO8P	2	0.7539	70812-59-8	22599.5	20541.8	44345.6	28106.8	33556.1	30191	0.311604	0.867581	0.925175	0.952456	-0.0702753	insig
MEDP0362	D-(+)-Neopterin	Alkaloids	Alkaloids	C9H11N5O4	2	0.7535	2009-64-5	47997.9	40826.1	51724.4	55822.8	51105.3	33081.1	0.0981852	0.982779	0.990641	1.00385	0.00554571	insig
MEDN1110	1,11-Undecanedicarboxylic acid	Lipids	Free fatty acids	C13H24O4	2	0.7534	505-52-2	712555	762412	754398	601181	599450	553080	1.40234	0.0019915	0.0208564	1.27123	0.346221	insig
MEDP2294	Steviol	Terpenoids	Ditepenoids	C20H30O3	2	0.7532	471-80-7	39710.9	30899	33500.3	236467	232024	233190	1.45458	7.76062e-06	0.00149004	0.148373	-2.7527	down
MW0106196	Cyanuric acid	Organic acids	Organic acids	C3H3N3O3	2	0.7521	108-80-5	198706	202893	168893	291160	303123	281386	1.4024	0.00286857	0.0256454	0.651493	-0.618178	insig
MW0052877	2-trans,6-trans-Farnesal	Others	Aldehyde compounds	C15H24O	2	0.7512	502-67-0	6.3	6.3	6.31	6.3	6.3	31.52	0.651857	0.422802	0.597735	0.428604	-1.22228	insig
MW0016414	Carvyl acetate	Terpenoids	Monoterpenoids	C12H18O2	2	0.751	97-42-7	39714.7	31352	42459.7	30390.3	33639.4	30387.5	0.978053	0.189114	0.368895	1.20239	0.265905	insig
MW0054299	L-canavanine	Amino acids and derivatives	Amino acids and derivatives	C5H12N4O3	2	0.7506	543-38-4	118318	129260	132134	137601	121894	127166	0.263316	0.729714	0.831576	0.982028	-0.0261639	insig
MW0103535	2',3'-Dideoxyinosine	Nucleotides and derivatives	Nucleotides and derivatives	C10H12N4O3	2	0.7504	69655-05-6	1806.06	520.71	263.87	275696	269118	242002	1.43401	0.0015217	0.0177256	0.00329256	-8.24657	down
MEDL02462	Phosphoserine	Amino acids and derivatives	Amino acids and derivatives	C3H8NO6P	2	0.7489	407-41-0	15003.3	16121	5140.81	56566.6	37926.6	25042.6	1.19618	0.0789966	0.209411	0.303382	-1.72079	down
MW0106869	L-Glutaminyl-L-serine	Amino acids and derivatives	Amino acids and derivatives	C8H15N3O5	2	0.7486	5875-40-1	382192	323220	330250	414931	377853	401419	1.1272	0.0854823	0.220803	0.867241	-0.205495	insig
MW0106942	Glutamylasparagine	Amino acids and derivatives	Amino acids and derivatives	C9H15N3O6	2	0.747	36314-37-1	7321.2	5466.1	3136.17	11459.7	9179.66	8392.05	1.13015	0.0492041	0.150983	0.548491	-0.866459	insig
MW0006047	Anethole	Phenolic acids	Phenolic acids	C10H12O	2	0.7468	4180-23-8 | 104-46-1 | 26795-32-4	2147.93	2093.21	1267.14	91543.7	81665.8	83494.1	1.45296	0.00120382	0.0160647	0.0214577	-5.54236	down
MW0009376	Phenelzine	Benzene and substituted derivatives	Benzene and substituted derivatives	C8H12N2	2	0.7466	51-71-8	13388.6	11758.2	11087.8	17083.5	18043.7	15895.7	1.36025	0.00608314	0.0408787	0.710165	-0.493773	insig
MW0103675	Thymidine-5'-phosphate	Nucleotides and derivatives	Nucleotides and derivatives	C10H15N2O8P	2	0.7452	365-07-1	419157	413424	399255	702459	658504	841040	1.41219	0.026584	0.100929	0.559416	-0.838006	insig
MW0011680	cis-4-Decen-1-ol	Alcohol and amines	Alcohols	C10H20O	2	0.7444	57074-37-0	86943.1	94386.7	85162.7	96726.8	95811.6	98320.3	1.17794	0.0943945	0.234131	0.916227	-0.126224	insig
MEDN1876	Vanylglycol	Benzene and substituted derivatives	Benzene and substituted derivatives	C9H12O4	2	0.744	534-82-7	80.73	640.11	334.6	523.72	128.06	352.06	0.10169	0.93544	0.963957	1.0514	0.0723152	insig
MW0054219	2-alpha-D-glucosyl-D-glucose	Others	Saccharides	C12H22O11	2	0.7439	2864-54-2	559439	289444	291183	282941	284884	274218	0.728853	0.383483	0.569505	1.35393	0.437152	insig
MW0013397	MG(0:0/20:4(5Z,8Z,11Z,14Z)/0:0)	GL	MG	C23H38O4	2	0.7433	53847-30-6	540.14	315.32	647.88	9592.64	7581.97	7198.7	1.43938	0.00846626	0.0501262	0.0616798	-4.01906	down
MW0139227	Oxyresveratrol	Heterocyclic compounds	Heterocyclic compounds	C14H12O4	2	0.743	29700-22-9 | 4721-07-7	1.13814e+06	1.17294e+06	1.02959e+06	1.33525e+06	1.3247e+06	1.44035e+06	1.32399	0.0117979	0.0611428	0.814737	-0.295594	insig
MW0119658	3-Isomangostin	Flavonoids	Other Flavonoids	C24H26O6	2	0.7422	19275-46-8	3603.03	2453.41	10153.6	7759.48	11081.2	10654	0.965408	0.197905	0.379075	0.549592	-0.863568	insig
MW0107238	Methyl hippurate	Others	Lactones	C10H11NO3	2	0.7411	1205-08-9	19327.8	2506.82	19179.1	16164.5	4835.06	1683.14	0.476532	0.440817	0.613099	1.80815	0.854516	insig
MW0000184	Cinchonine	Alkaloids	Alkaloids	C19H22N2O	2	0.7411	118-10-5	2055.23	1277.42	2688.15	1489.09	323.21	224	1.09053	0.0822925	0.215317	2.95674	1.56401	up
MW0114000	beta-L-fucose 1-phosphate	Organic acids	Organic acids	C6H13O8P	2	0.741	16562-59-7	137046	100599	114164	183264	198343	179939	1.3554	0.0097339	0.0543588	0.6265	-0.674613	insig
MEDN1388	Sedoheptulose	Others	Saccharides	C7H14O7	2	0.7403	3019-74-7	3961.7	3623.57	3146.48	4357.24	12169.8	4440.33	0.908712	0.318162	0.507448	0.511832	-0.966258	insig
MEDN0038	Oxiglutatione	Amino acids and derivatives	Amino acids and derivatives	C20H32N6O12S2	2	0.7399	27025-41-8	42758.6	47154.1	44336.3	58604.8	55201.3	52134.9	1.346	0.0127652	0.0637787	0.809016	-0.30576	insig
MW0007471	Labetalol	Benzene and substituted derivatives	Benzene and substituted derivatives	C19H24N2O3	2	0.7398	36894-69-6 | 32780-40-8	18025.7	14294	15026.9	19813.3	17151.8	20606.1	1.07879	0.0929206	0.23285	0.8224	-0.282089	insig
MEDP1830	Ethyl p-methoxycinnamate	Phenolic acids	Phenolic acids	C12H14O3	2	0.7348	24393-56-4	18420.7	12435.5	21289.2	8656.5	13488.5	15404.2	0.837557	0.217911	0.402482	1.38872	0.473761	insig
MW0138975	mollicellin H	Heterocyclic compounds	Heterocyclic compounds	C21H20O6	2	0.7344	68455-09-4	44419	39846.6	43938.1	27475.4	25085.8	15413.4	1.27788	0.0207159	0.0863771	1.88605	0.91537	insig
MW0106579	Edetic acid	Organic acids	Organic acids	C10H16N2O8	2	0.7329	62-33-9	35571.1	70110.8	63574.1	34246	37951.5	45860.2	0.847679	0.243874	0.429471	1.43367	0.519715	insig
MW0014501	4-Hydroxynonenal	Organic acids	Organic acids	C9H16O2	2	0.7325	75899-68-2	1844.92	1680.62	3804.6	690.55	2341.71	956.88	0.880251	0.26672	0.45607	1.83752	0.877763	insig
MW0115792	2-(1-methyl-1H-imidazol-4-yl)acetic acid	Organic acids	Organic acids	C6H8N2O2	2	0.7323	2625-49-2	11033.3	44.52	37.1	181675	174263	171705	1.26493	5.02459e-06	0.00106627	0.0210653	-5.56899	down
MW0114697	Lacto-N-fucopentoase-3	Others	Saccharides	C32H55NO25	2	0.7314	25541-09-7	217.34	322.39	864.96	393.78	84.92	120.79	0.859135	0.318075	0.507448	2.34314	1.22844	insig
MW0000243	Ecgonine methyl ester	Alkaloids	Tropan alkaloids	C10H17NO3	2	0.7294	7143-09-1	5262.72	11934.7	9578.42	24794.1	11486.1	25766.9	1.10492	0.110115	0.260552	0.43154	-1.21243	down
MW0063802	Tetradecanal	FA	Others	C14H28O	2	0.729	124-25-4	25903.1	22142.6	27529.8	23828.9	26757	26980.4	0.268888	0.746321	0.845034	0.974333	-0.0375127	insig
MW0136978	7,3',4',5'-Tetrahydroxyflavone	Flavonoids	Flavones	C15H10O6	2	0.7287	67858-31-5	83804.7	138126	119516	169080	205120	255070	1.24292	0.0399374	0.132207	0.542606	-0.882023	insig
MW0014489	4-Hydroxybutyric acid	Organic acids	Organic acids	C4H8O3	2	0.7281	591-81-1	1.37994e+06	1.40365e+06	1.49402e+06	1.90363e+06	1.80234e+06	1.7348e+06	1.39703	0.00423046	0.0326666	0.786214	-0.347007	insig
MW0103525	Deoxyuridine-5'-diphosphate	Nucleotides and derivatives	Nucleotides and derivatives	C9H14N2O11P2	2	0.7267	4208-67-7	208312	68810.4	87012.8	45682.2	98327.8	1238.06	0.794049	0.244885	0.430396	2.50699	1.32595	insig
MW0114558	Glucovanillin	Benzene and substituted derivatives	Benzene and substituted derivatives	C14H18O8	2	0.7238	494-08-6	101206	94479.8	131072	81278.9	88922.5	59444.3	1.09337	0.0900628	0.227981	1.42288	0.508813	insig
MW0139715	[(2R,3R,4S,5S,6R)-2-[(1R,2Z,3S,4R,5S)-2-(cyanomethylidene)-3-hydroxy-4,5-dimethoxycyclohexyl]oxy-4,5-dihydroxy-6-(hydroxymethyl)oxan-3-yl] (Z)-3-(4-hydroxy-3-methoxyphenyl)prop-2-enoate	Others	Lactones	C26H33NO12	2	0.7236	67411-22-7	791.09	918.57	2196	1495.9	598.86	311.11	0.676546	0.434623	0.608013	1.62339	0.699008	insig
MEDN1324	5-Phenylvaleric acid	Organic acids	Organic acids	C11H14O2	2	0.7232	2270-20-4	120.44	188.17	1073.92	304.31	569.15	65.35	0.19864	0.694225	0.806167	1.47264	0.558406	insig
MW0127881	3',4'-Dimethoxy-2'-hydroxychalcone	Others	Ketone compounds	C17H16O4	2	0.7228	82964-34-9 | 7478-65-1	4254.04	5521.08	3295.45	1810.29	1377.01	1002.92	1.3566	0.0324519	0.115691	3.1193	1.64122	up
MW0108066	Lys-Met	Amino acids and derivatives	Amino acids and derivatives	C11H23N3O3S	2	0.7227	97729-52-7	8431.86	7416.33	6288.73	27254.2	36575.2	28014.8	1.43639	0.0132793	0.065216	0.241027	-2.05274	down
MW0106813	Gln-Gly	Amino acids and derivatives	Amino acids and derivatives	C7H13N3O4	2	0.7225	2650-65-9	2776.68	1512.88	1352.51	25089.8	15105.8	14629	1.41623	0.0386243	0.129562	0.102911	-3.28053	down
MW0114628	Inositol 1,3-bisphosphate	Others	Saccharides	C6H14O12P2	2	0.7209	103597-56-4	231601	238731	82347.4	376518	146410	274372	0.596072	0.389332	0.573962	0.693189	-0.528679	insig
MW0105524	Ala-Lys	Amino acids and derivatives	Amino acids and derivatives	C9H19N3O3	2	0.7204	6366-77-4	73841.2	75946.9	78597.3	81230.7	66190.6	71522.4	0.500192	0.555269	0.703597	1.04312	0.0609113	insig
MW0012774	1-Eicosanoyl-sn-glycero-3-phosphocholine	Lipids	LPC	C28H58NO7P	2	0.7196	108341-80-6	12416.7	8454.93	15101.3	18483.5	14857.2	15923.3	0.992694	0.134795	0.294947	0.730207	-0.453622	insig
MW0003823	m-Aminobenzoic acid	Benzene and substituted derivatives	Benzene and substituted derivatives	C7H7NO2	2	0.7189	99-05-8	577239	744245	748988	324351	250809	252504	1.41109	0.00909791	0.0522463	2.50158	1.32284	up
MW0106444	Dihydrofolic acid	Organic acids	Organic acids	C19H21N7O6	2	0.7185	4033-27-6	57446.3	52719.6	37884.4	58587	55239.4	57167.9	0.77022	0.323129	0.510124	0.865819	-0.207863	insig
MW0106770	gamma-Glutamylglutamate	Amino acids and derivatives	Amino acids and derivatives	C10H16N2O7	2	0.7175	1116-22-9	72453.9	74783.2	74004.4	52628.8	50879.6	42721.9	1.39259	0.0115053	0.0600897	1.51297	0.597379	insig
MW0054002	Hyperforin	Heterocyclic compounds	Heterocyclic compounds	C35H52O4	2	0.717	11079-53-1	11697.6	6314.72	7681.99	12628.8	6606.53	10251.9	0.365939	0.623928	0.757735	0.871372	-0.198639	insig
MW0129795	11,12-Dimethoxydihydrokawain	Others	Ketone compounds	C16H20O5	2	0.7148	38146-60-0	249.94	184.23	773.52	121.52	3213.5	277.69	0.248509	0.510624	0.668453	0.334289	-1.58083	insig
MW0001218	Propylene glycol dibenzoate	Benzene and substituted derivatives	Benzene and substituted derivatives	C17H16O4	2	0.7142	19224-26-1	118223	84337.6	118366	63460.3	79601.5	73850.6	1.20482	0.0757825	0.202892	1.47953	0.565135	insig
MW0107510	Ile-Ser	Amino acids and derivatives	Amino acids and derivatives	C9H18N2O4	2	0.7139	6403-14-1	3024.77	1279.63	308.44	6642.69	6019.08	6682.35	1.17308	0.0193897	0.083347	0.238462	-2.06817	down
MW0133989	Negletein	Others	Ketone compounds	C16H12O5	2	0.7134	29550-13-8	325026	336212	382962	401697	449603	362395	0.995777	0.148951	0.315095	0.860348	-0.217007	insig
MW0054899	Methyl linoleate	Lipids	Free fatty acids	C19H34O2	2	0.7124	112-63-0	511825	624679	644181	822352	601209	586960	0.585518	0.440196	0.612657	0.885683	-0.175138	insig
MW0124096	Famprofazone	Others	Ketone compounds	C24H31N3O	2	0.7103	22881-35-2	194662	188005	196571	160340	150953	149666	1.42387	0.00100282	0.0142372	1.2566	0.32952	insig
MW0105885	Aspartylalanine	Amino acids and derivatives	Amino acids and derivatives	C7H12N2O5	2	0.7066	13433-02-8	29568.9	21226.6	25556.7	20566.5	19356.7	49082.6	0.151167	0.710383	0.817661	0.857834	-0.22123	insig
MW0112142	2'-Fucosyl-D-lactose	Others	Saccharides	C18H32O15	2	0.706	41263-94-9	9793.77	10280.9	12390	8870.23	4924.38	8415.69	1.03806	0.0936167	0.233217	1.46169	0.547642	insig
MW0130875	2-Methoxycinnamaldehyde	Phenolic acids	Phenolic acids	C10H10O2	2	0.7044	1504-74-1	248735	255527	264718	288736	266354	281559	1.18903	0.0554041	0.163416	0.91912	-0.121675	insig
MW0112752	Kynuramine	Alcohol and amines	Amines	C9H12N2O	2	0.7041	363-36-0	6074.24	73.15	8415.61	3254.36	290.49	5560.85	0.0464889	0.572894	0.718032	1.59933	0.677466	insig
MW0127953	4-Hydroxychalcone	Flavonoids	Chalcones	C15H12O2	2	0.7039	20426-12-4 | 38239-55-3	32248.3	29599.3	32441.2	22602.5	21870.1	15537.8	1.28842	0.0237111	0.0953931	1.57121	0.651874	insig
MW0012071	11-Aminoundecanoic acid	Benzene and substituted derivatives	Benzene and substituted derivatives	C11H23NO2	2	0.7037	2432-99-7 | 25035-04-5 | 25587-80-8	1005.75	243.84	334.21	911.72	1154.83	727.33	0.930515	0.232748	0.417596	0.566882	-0.81888	insig
MW0168309	12-Oxo-2,3-dinor-10,15-phytodienoic acid	Organic acids	Organic acids	C16H24O3	2	0.7013	197247-23-7	709837	628711	621267	802853	744393	882604	1.24675	0.0384124	0.129066	0.806558	-0.310149	insig
MW0001273	1,2,4-Benzenetriol	Phenolic acids	Phenolic acids	C6H6O3	2	0.7001	533-73-3	15404.6	22777.7	11362.4	1099.67	1571.74	6224.31	1.26559	0.037621	0.127362	5.5695	2.47755	up
MEDN0198	Citric acid	Organic acids	Organic acids	C6H8O7	3	0.9998	77-92-9	209758	197148	209734	72259.3	64332.9	31663.2	1.36343	0.00349268	0.0283886	3.66491	1.87378	up
MW0013649	Allyl cyclohexanebutyrate	Organic acids	Organic acids	C13H22O2	3	0.9988	7493-65-4	26258.4	26000	24592.2	59921.8	50540.7	53157	1.44387	0.00758197	0.0467439	0.469691	-1.09022	down
MEDP0167	Guanosine	Nucleotides and derivatives	Nucleotides and derivatives	C10H13N5O5	3	0.998	118-00-3 | 26578-09-6 | 197227-95-5 | 103654-69-9 | 103654-70-2 | 146849-94-7 | 197227-93-3 | 202933-46-8 | 244769-87-7 | 247226-75-1 | 250586-91-5 | 250586-97-1 | 30747-23-0	55772	86532	87424.6	62330.5	52940.6	54608.8	0.979986	0.188823	0.368535	1.3523	0.435415	insig
MEDL02174	n-Oleoylethanolamine	Alkaloids	Alkaloids	C20H39NO2	3	0.995	111-58-0	768.37	1341.23	2367.79	597.85	75.89	1651.97	0.753597	0.337373	0.523792	1.92517	0.944987	insig
MEDP0395	Pipecolic acid	Alkaloids	Alkaloids	C6H11NO2	3	0.9876	535-75-1	90551.9	120378	121595	203600	176377	104818	0.895801	0.220873	0.405722	0.685908	-0.543912	insig
MEDP0022	L-Proline	Amino acids and derivatives	Amino acids and derivatives	C5H9NO2	3	0.987	147-85-3	251384	240948	225497	162700	140672	132691	1.40758	0.00148573	0.0176663	1.64616	0.719105	insig
MEDN1562	Monobutyl phthalate	Others	Lactones	C12H14O4	3	0.9854	131-70-4	831336	791970	844460	1.12432e+06	1.08451e+06	1.0174e+06	1.41138	0.00570698	0.039537	0.764906	-0.386646	insig
MEDP0251	Trigonelline	Alkaloids	Pyridine alkaloids	C7H7NO2	3	0.984	535-83-1	282470	319523	262620	642385	655146	434203	1.3413	0.0498355	0.151795	0.499276	-1.00209	down
MEDL02396	Sucrose	Others	Saccharides	C12H22O11	3	0.9815	57-50-1	2.49767e+07	2.88033e+07	2.16782e+07	8.67537e+06	8.13184e+06	8.00204e+06	1.44181	0.0138504	0.0666949	3.04153	1.6048	up
MEDL00575	L-Isoleucine	Amino acids and derivatives	Amino acids and derivatives	C6H13NO2	3	0.981	73-32-5	2.35027e+06	2.41501e+06	2.46634e+06	1.23637e+06	1.23273e+06	610121	1.29395	0.0196916	0.0841066	2.34852	1.23175	up
MEDL00009	L-Valine	Amino acids and derivatives	Amino acids and derivatives	C5H11NO2	3	0.9793	72-18-4	452100	449965	432744	309602	296548	306502	1.45176	0.000132009	0.00540732	1.46256	0.548495	insig
MW0015654	All-trans-heptaprenyl diphosphate	Organic acids	Organic acids	C35H60O7P2	3	0.9786	76078-18-7	266.24	259.18	24.16	48.86	81.35	232.23	0.155861	0.560886	0.706974	1.51633	0.600587	insig
MEDP0054	Glutamine	Amino acids and derivatives	Amino acids and derivatives	C5H10N2O3	3	0.9782	56-85-9	446668	353427	392311	426755	415109	439336	0.699629	0.388994	0.573962	0.930695	-0.103619	insig
MEDP0081	Serotonin	Alkaloids	Plumerane	C10H12N2O	3	0.9754	50-67-9	31074	108909	85573.1	257042	162334	119259	1.06439	0.107249	0.256025	0.418755	-1.25582	down
MEDP1083	Oxypurinol	Heterocyclic compounds	Heterocyclic compounds	C5H4N4O2	3	0.9746	2465-59-0 | 184764-63-4 | 187486-05-1 | 187486-06-2	868904	906984	957901	1.17603e+06	1.15827e+06	1.16103e+06	1.4212	0.00792179	0.0483949	0.782128	-0.354523	insig
MEDN0006	L-Tyrosine	Amino acids and derivatives	Amino acids and derivatives	C9H11NO3	3	0.9736	60-18-4	1.84974e+06	1.91807e+06	2.15586e+06	2.05775e+06	1.93962e+06	1.83552e+06	0.183068	0.803359	0.884287	1.01556	0.022279	insig
MEDL01914	2,6-Dihydroxybenzoic acid	Benzene and substituted derivatives	Benzene and substituted derivatives	C7H6O4	3	0.9717	303-07-1	1799.72	4644.31	3759.92	3787.18	2744.15	2764.56	0.0711969	0.763517	0.8582	1.09768	0.134463	insig
MEDP0101	4-Hydroxycinnamic acid	Phenolic acids	Phenolic acids	C9H8O3	3	0.9698	501-98-4	140.39	311.41	119.07	1248.65	818.7	745.5	1.35214	0.0287683	0.105989	0.202951	-2.3008	down
MEDL00586	Arginine	Amino acids and derivatives	Amino acids and derivatives	C6H14N4O2	3	0.9688	74-79-3	227948	245012	229422	155436	151150	181852	1.38191	0.00634912	0.0420355	1.43802	0.524085	insig
MEDN0422	2'-Deoxyadenosine	Nucleotides and derivatives	Nucleotides and derivatives	C10H13N5O3	3	0.9675	958-09-8	25670.5	9755.39	30640.5	24479.8	26386.9	35953	0.644957	0.406122	0.587146	0.760961	-0.394106	insig
MEDP0085	Tyramine	Alkaloids	Alkaloids	C8H11NO	3	0.9667	51-67-2	22208.3	9114.38	11315.2	29064.3	32650.9	25642.3	1.19322	0.0472924	0.146342	0.488085	-1.0348	down
MEDN0428	Succinyladenosine	Nucleotides and derivatives	Nucleotides and derivatives	C14H17N5O8	3	0.9653	4542-23-8	151617	163075	141587	112409	113987	106687	1.40115	0.0139406	0.0669151	1.36986	0.454032	insig
MEDP0020	Methionine	Amino acids and derivatives	Amino acids and derivatives	C5H11NO2S	3	0.9651	63-68-3	75730.6	78118.5	86129.7	62427.4	50946.1	53755.8	1.35644	0.0066864	0.0432565	1.43589	0.521942	insig
MEDN0455	Guanine	Nucleotides and derivatives	Nucleotides and derivatives	C5H5N5O	3	0.9633	73-40-5	63588.6	63252.6	50113.4	179989	156001	161260	1.43757	0.000671907	0.0119043	0.355866	-1.49059	down
MEDN0151	Adenine	Nucleotides and derivatives	Nucleotides and derivatives	C5H5N5	3	0.9623	73-24-5	8272.84	9813.15	2155.91	20599.4	11999.5	60929.4	1.07805	0.24498	0.430396	0.216425	-2.20806	down
MEDL01940	Feruloylputrescine	Alkaloids	Phenolamine	C14H20N2O3	3	0.9615	501-13-3 | 91000-11-2	24972.3	37640.4	35508.4	134552	119050	145825	1.4308	0.00149065	0.0176663	0.245654	-2.0253	down
MEDL01799	Isoscutellarein	Flavonoids	Flavones	C15H10O6	3	0.9608	41440-05-5	1030.14	246.29	2136.71	15571.6	14044.5	13846.1	1.33449	6.60561e-05	0.00361612	0.0785312	-3.67059	down
MW0011145	(3b,16a,20R)-3,16,20,22,25-Pentahydroxy-5-cucurbiten-11-one 3-[glucosyl-(1->6)-glucoside]	Others	Ketone compounds	C42H70O16	3	0.96	178062-94-7	103105	91773	109813	101908	93742.8	108219	0.0183312	0.969636	0.983788	1.0027	0.00388785	insig
MEDP1468	Panthenol	Others	Alcohol compounds	C9H19NO4	3	0.9593	81-13-0	50166.4	85472.2	92790.3	42514.9	38560.4	43830	1.20123	0.117818	0.27223	1.82882	0.870911	insig
MEDN0031	Pyroglutamic acid	Amino acids and derivatives	Amino acids and derivatives	C5H7NO3	3	0.9589	98-79-3	61900.1	68058.6	68480.1	170992	160313	139213	1.44058	0.00790506	0.048366	0.421746	-1.24556	down
MW0138003	Diosmin	Flavonoids	Flavones	C28H32O15	3	0.9586	520-27-4	1.11003e+06	1.23268e+06	1.10807e+06	1.17287e+06	1.15355e+06	1.07015e+06	0.245058	0.746293	0.845034	1.01596	0.0228471	insig
MEDL01762	Sakuranetin	Flavonoids	Flavanones	C16H14O5	3	0.9582	2957-21-3	219.02	4.42	16.17	4290.16	2309.49	3990.68	1.31841	0.029145	0.106831	0.0226254	-5.46592	down
MEDL00101	Sphinganine	SL	SPH	C18H39NO2	3	0.9573	764-22-7	2618.05	13980.9	660.86	6404.32	1534.77	3794.23	0.10712	0.708374	0.81558	1.47101	0.556803	insig
MEDN1015	Nicotinic acid	Others	Vitamin	C6H5NO2	3	0.9567	59-67-6	87876.7	57624.2	54163.2	99053.3	87425.9	90656.5	1.08812	0.126712	0.284296	0.720456	-0.473018	insig
MEDP1647	2-Amino-1-phenylethanol	Alkaloids	Alkaloids	C8H11NO	3	0.9565	7568-93-6	6.30496e+06	6.29333e+06	6.35357e+06	4.84568e+06	4.82757e+06	4.82782e+06	1.45854	3.76768e-05	0.00295188	1.30693	0.38618	insig
MEDP0646	2,3-Dihydrobenzofuran	Benzene and substituted derivatives	Benzene and substituted derivatives	C8H8O	3	0.9561	496-16-2	116342	120572	141934	150851	125847	136012	0.690508	0.353177	0.539603	0.917954	-0.123506	insig
MEDP1315	Quinoline	Alkaloids	Quinoline alkaloids	C9H7N	3	0.9558	91-22-5	106450	112886	99927.3	54247.6	58278.5	66542.6	1.41895	0.000855949	0.0131725	1.78291	0.834234	insig
MEDL02311	Moschamine	Alkaloids	Plumerane	C20H20N2O4	3	0.9557	68573-23-9	32263.2	22845.9	28490.1	65917.7	56881.7	64372.1	1.40769	0.000907965	0.0137628	0.446645	-1.1628	down
MEDL01942	Dibutyl phthalate	Phenolic acids	Phenolic acids	C16H22O4	3	0.9551	84-74-2	319619	297129	327766	454842	437871	400483	1.39549	0.00683554	0.0438868	0.730372	-0.453297	insig
MEDP0453	Indole	Alkaloids	Plumerane	C8H7N	3	0.9527	120-72-9	275383	292226	286552	159155	151212	158022	1.45446	0.000197398	0.0065027	1.82361	0.8668	insig
MEDP0442	Choline Alfoscerate	Lipids	PC	C8H20NO6P	3	0.9525	28319-77-9	495397	440711	463824	518296	454143	435279	0.045249	0.935314	0.963957	0.994469	-0.00800154	insig
MEDN0153	Adenosine monophosphate	Nucleotides and derivatives	Nucleotides and derivatives	C10H14N5O7P	3	0.9522	61-19-8	886309	902728	1.22762e+06	1.20861e+06	1.19608e+06	842871	0.322291	0.662408	0.785055	0.928898	-0.106408	insig
MEDP0125	Choline	Alkaloids	Alkaloids	C5H14NO+	3	0.9519	62-49-7	1.07241e+06	1.03679e+06	989637	954133	1.08634e+06	1.00061e+06	0.315418	0.698265	0.808254	1.01899	0.0271439	insig
MEDL01737	5-Aminoimidazole ribonucleotide	Nucleotides and derivatives	Nucleotides and derivatives	C8H14N3O7P	3	0.9498	25635-88-5	40529.9	99687.5	131966	168226	186201	187935	1.08779	0.0711469	0.193696	0.501849	-0.994675	insig
MW0114590	Hexaethylene glycol	Alcohol and amines	Alcohols	C12H26O7	3	0.9494	2615-15-8	84129.9	86521.1	84587.7	114062	118624	114810	1.45225	0.000300486	0.00816501	0.734509	-0.445147	insig
MEDP1051	Sphingosine	Lipids	Sphingolipids	C18H37NO2	3	0.9493	123-78-4	20.36	17.88	1431.13	1490.54	126.39	1967.43	0.795297	0.38727	0.572178	0.409939	-1.28652	insig
MEDN0551	3-Indoleacrylic acid	Alkaloids	Plumerane	C11H9NO2	3	0.9482	29953-71-7	1.41618e+07	1.45533e+07	1.44469e+07	7.83737e+06	7.70851e+06	7.70717e+06	1.45821	6.1893e-05	0.00353049	1.85619	0.892344	insig
MEDP1162	1-Methylguanine	Nucleotides and derivatives	Nucleotides and derivatives	C6H7N5O	3	0.9482	938-85-2	36221.1	172102	181564	204833	195852	218895	0.790653	0.242977	0.429121	0.629277	-0.668233	insig
MEDP0179	Uridine	Nucleotides and derivatives	Nucleotides and derivatives	C9H12N2O6	3	0.9481	58-96-8	22973.3	28764	33762.1	20096.9	24779.7	22301.5	0.984902	0.179264	0.356169	1.27273	0.347921	insig
MEDP1160	LPE(18:1/ 0:0)	Lipids	LPE	C23H46NO7P	3	0.9473	89576-29-4	1875.36	153.27	1549.28	3913.67	1596.51	4544.21	0.909506	0.122819	0.280095	0.355856	-1.49064	insig
MW0111937	2,3-Butanediol glucoside	Alcohol and amines	Alcohols	C10H20O7	3	0.9466	146763-54-4	1.19218e+06	1.27704e+06	1.17693e+06	1.26712e+06	1.8907e+06	1.19894e+06	0.693233	0.394555	0.57849	0.836895	-0.256881	insig
MEDN0682	Octadecanamide	Lipids	Free fatty acids	C18H37NO	3	0.946	124-26-5	2603.82	1885.07	394.73	1975.05	10196.7	5991.08	0.981713	0.197237	0.37802	0.26888	-1.89497	insig
MEDL01831	n-cis-Feruloyltyramine	Alkaloids	Phenolamine	C18H19NO4	3	0.9433	80510-09-4	432	23532.7	28929.8	11968	25384.7	29828.7	0.552436	0.671195	0.79038	0.787339	-0.344944	insig
MEDN1545	Guanosine-5'-monophosphate	Nucleotides and derivatives	Nucleotides and derivatives	C10H14N5O8P	3	0.9422	85-32-5 | 128952-18-1 | 29593-02-0	5667.38	9943.78	231.1	30188.2	34392.1	27876.3	1.07704	0.00274349	0.0250431	0.171348	-2.545	down
MEDL02050	Niacinamide	Others	Vitamin	C6H6N2O	3	0.9409	98-92-0	56356.9	10034.6	158974	207048	194071	193508	0.989249	0.106143	0.253988	0.379004	-1.39972	insig
MEDP0065	N-Acetyl-L-glutamic acid	Amino acids and derivatives	Amino acids and derivatives	C7H11NO5	3	0.9387	1188-37-0	6555.53	7387.38	7543.91	8399.42	11453.9	11211.6	1.24848	0.0715659	0.194312	0.691674	-0.531836	insig
MEDP1077	2'-O-Methyladenosine	Nucleotides and derivatives	Nucleotides and derivatives	C11H15N5O4	3	0.9381	2140-79-6	24241.9	47231.1	35240.7	85564.6	80940.5	38004.6	1.01098	0.151797	0.319272	0.521803	-0.938424	insig
MW0115033	Nonoxynol-9	Benzene and substituted derivatives	Benzene and substituted derivatives	C33H60O10	3	0.9374	26571-11-9	197087	101561	189988	108580	100650	88929.5	1.04182	0.17099	0.345752	1.63884	0.712679	insig
MEDN0068	S-(5-Adenosy)-L-Homocysteine	Amino acids and derivatives	Amino acids and derivatives	C14H20N6O5S	3	0.9368	979-92-0	42604.4	47829.8	52647.9	68551.6	62356.7	66959.5	1.34863	0.00943086	0.0531821	0.72312	-0.467693	insig
MW0012956	PC(16:0/20:4(5Z,8Z,11Z,14Z))	GP	PC	C44H80NO8P	3	0.9356	35418-58-7	182.57	11.62	3231.98	940.73	5333.46	360.66	0.667884	0.605253	0.743938	0.51639	-0.953467	insig
MEDP1493	N6-Methyladenosine	Nucleotides and derivatives	Nucleotides and derivatives	C11H15N5O4	3	0.9341	1867-73-8	2099.99	4286.58	2879.92	10738.3	8967.32	5477.25	1.26524	0.0592395	0.170915	0.367968	-1.44235	down
MEDN1502	2-Phenylbutyric acid	Organic acids	Organic acids	C10H12O2	3	0.9341	90-27-7	377602	393568	423006	428597	444455	424236	1.10566	0.106317	0.254101	0.920518	-0.119483	insig
MW0014162	3-Methyl-5-pentyl-2-furannonanoic acid	Organic acids	Organic acids	C19H32O3	3	0.9333	57818-39-0	587.06	227.09	37.47	1095.72	5804.49	6600.06	1.2181	0.132305	0.292304	0.0630817	-3.98663	down
MEDP0276	Indole-3-carboxaldehyde	Alkaloids	Plumerane	C9H7NO	3	0.9325	487-89-8	1.59387e+06	1.77058e+06	1.62951e+06	942292	951226	883699	1.44589	0.0020434	0.0210639	1.79819	0.846544	insig
MEDL02483	5-Hydroxytryptophol	Alkaloids	Plumerane	C10H11NO2	3	0.9296	154-02-9	542215	591301	627488	1.17614e+06	1.09716e+06	1.00662e+06	1.43092	0.00285377	0.0255698	0.536905	-0.897262	insig
MEDL02018	(2E)-Decenoyl-ACP	Amino acids and derivatives	Amino acids and derivatives	C6H11NO2	3	0.9287	52-52-8	81659.2	78403.2	83468.8	140665	136552	134684	1.4537	2.16902e-05	0.00265015	0.591237	-0.758191	insig
MEDL01887	2-Hydroxybenzaldehyde	Phenolic acids	Phenolic acids	C7H6O2	3	0.9283	90-02-8	574056	1.13298e+06	1.09275e+06	584261	511567	512644	1.09495	0.155879	0.324139	1.74065	0.799626	insig
MEDP0212	N-Acetylserotonin	Alkaloids	Plumerane	C12H14N2O2	3	0.9275	1210-83-9	4900.77	7824.17	4226.44	5258.35	5786.52	6196.93	0.190345	0.939158	0.965499	0.983156	-0.0245077	insig
MEDN0128	Vanillin	Phenolic acids	Phenolic acids	C8H8O3	3	0.9257	121-33-5	4317.62	8216.86	4435.92	5880.28	2601.14	4702.89	0.549056	0.477576	0.642982	1.28717	0.364199	insig
MEDL02347	L-Phenylalanine	Amino acids and derivatives	Amino acids and derivatives	C9H11NO2	3	0.9251	63-91-2	14135.1	11085.6	12834.2	16565.2	11359.9	13707.5	0.443844	0.540183	0.692754	0.914066	-0.12963	insig
MW0005118	4-Hydroxyphenylacetaldehyde	Benzene and substituted derivatives	Benzene and substituted derivatives	C8H8O2	3	0.9247	7339-87-9	183181	191039	179520	142817	148030	154107	1.41153	0.00154266	0.0178736	1.24449	0.31555	insig
MEDL02620	3'-Methoxydaidzein	Flavonoids	Isoflavones	C16H12O5	3	0.921	21913-98-4	35417.9	29680.3	34900.1	66730.9	66495.7	62463.3	1.43599	0.000241943	0.00724088	0.511004	-0.968594	insig
MEDL02710	Indole-3-acetamide	Alkaloids	Plumerane	C10H10N2O	3	0.9194	879-37-8	23989.4	7006.35	22437.4	15352.7	6238.96	14563.4	0.463576	0.417069	0.593793	1.47789	0.563536	insig
MEDL00873	Hydroxyurea	Alcohol and amines	Amines	CH4N2O2	3	0.918	127-07-1	275195	273887	235006	390537	373570	451457	1.3758	0.0116503	0.0606106	0.64504	-0.63254	insig
MEDP1667	Phe-Glu	Amino acids and derivatives	Amino acids and derivatives	C14H18N2O5	3	0.9179	3617-45-6	215590	210860	212230	181965	179887	178079	1.45053	7.38608e-05	0.00386762	1.18289	0.242321	insig
MW0106447	Diisodityrosine	Amino acids and derivatives	Amino acids and derivatives	C36H38N4O12	3	0.9166	175889-19-7	2770.04	2238.2	8157.22	3532.55	5877.77	11128.1	0.638949	0.450837	0.621674	0.641017	-0.641565	insig
MEDP0513	Palmitic amide	Others	Others	C16H33NO	3	0.9162	629-54-9	2805.6	2640.2	2249.94	726.93	2690.94	2750.38	0.568804	0.527252	0.682027	1.24764	0.319199	insig
MEDL02754	2,6-Dimethoxy-1,4-benzoquinone	Quinones	Quinones	C8H8O4	3	0.9159	530-55-2	90941.7	88218.4	89191.6	85757.7	86315.6	86697.7	1.29432	0.0450352	0.14164	1.03702	0.0524496	insig
MEDP1026	2,4-Dihydroxybenzoic acid	Phenolic acids	Phenolic acids	C7H6O4	3	0.913	89-86-1	98955.9	88387.2	102420	135997	110455	109934	1.13088	0.106007	0.253988	0.813061	-0.298564	insig
MEDN1476	Allantoic acid	Organic acids	Organic acids	C4H8N4O4	3	0.9123	99-16-1	404232	460956	476226	482339	448913	473643	0.590173	0.448405	0.619592	0.954814	-0.0667084	insig
MEDL00388	Cathinone	Alkaloids	Alkaloids	C9H11NO	3	0.9106	71031-15-7	140792	128078	121240	70523.4	76240.5	69417.4	1.43639	0.00478995	0.0349875	1.80455	0.851638	insig
MEDN1013	2'-Deoxyadenosine-5'-monophosphate	Nucleotides and derivatives	Nucleotides and derivatives	C10H14N5O6P	3	0.9096	653-63-4	69.03	89.13	106.69	81.61	179.76	165.01	0.894817	0.213364	0.398648	0.62116	-0.686964	insig
MEDL02227	Phenyl salicylate	Phenolic acids	Phenolic acids	C13H10O3	3	0.9091	118-55-8	45131.8	45037.4	46790.7	50924.7	51546.3	52931.9	1.40973	0.00172258	0.0191863	0.881321	-0.18226	insig
MW0012928	PC(O-16:0/20:5(5Z,8Z,11Z,14Z,17Z))	GP	PC	C44H80NO7P	3	0.9046	132196-28-2	101637	20513.3	213210	663743	142188	602757	1.00442	0.151728	0.319272	0.238065	-2.07057	down
MW0106116	Hydrogen carbonate	Organic acids	Organic acids	CH2O3	3	0.9046	71-52-3	182937	171946	185704	101708	199579	98953.6	0.890807	0.292245	0.482527	1.35066	0.43366	insig
MW0115115	Phenethyl rutinoside	Benzene and substituted derivatives	Benzene and substituted derivatives	C20H30O10	3	0.901	88510-08-1	155.21	71.25	679.25	2304.11	4382.89	3527.42	1.31161	0.0269304	0.101618	0.0886697	-3.49541	down
MEDN0400	gamma-Linolenic Acid	Lipids	Free fatty acids	C18H30O2	3	0.8999	506-26-3	73382.4	66703.3	75551	76731.4	79826.5	83983.1	1.1213	0.074044	0.199562	0.896465	-0.15768	insig
MEDP1800	Sanguinarine	Alkaloids	Isoquinoline alkaloids	C20H14NO4+	3	0.897	2447-54-3	181971	180172	233530	166184	162365	194471	0.766093	0.311901	0.501429	1.13891	0.187655	insig
MEDL01846	Dihydroferulic acid	Organic acids	Organic acids	C10H12O4	3	0.8963	1135-23-5	88959.7	85990.4	92857.3	70171.7	73762.2	70310.3	1.41614	0.00339344	0.0279052	1.25001	0.321939	insig
MW0132702	3,5,7-Trihydroxy-6,8-dimethoxyflavone	Others	Ketone compounds	C17H14O7	3	0.8953	33183-51-6	2.12269e+06	1.93858e+06	2.00809e+06	2.09056e+06	2.00634e+06	1.88034e+06	0.274261	0.72521	0.828812	1.01541	0.0220639	insig
MEDP0151	Isoguanine	Nucleotides and derivatives	Nucleotides and derivatives	C5H5N5O	3	0.8923	3373-53-3	31692.1	30655.9	5258.64	41420.2	46445.6	35774.3	0.855932	0.152654	0.320498	0.546801	-0.870911	insig
MEDP1685	Phytosphingosine	Lipids	Sphingolipids	C18H39NO3	3	0.8921	554-62-1	37193.4	1.27452e+06	10249.1	139919	122705	5401.33	0.222291	0.488608	0.652124	4.93224	2.30224	insig
MEDP1087	MG(18:2/0:0/0:0)	GL	MG	C21H38O4	3	0.8906	26545-74-4	1632.8	656.81	1662.34	1470.71	3112.28	397.54	0.00769064	0.718438	0.823308	0.79348	-0.333735	insig
MEDP0461	2-Methylguanosine	Nucleotides and derivatives	Nucleotides and derivatives	C11H15N5O5	3	0.8892	2140-77-4	1414.83	1720.45	1219.41	3045.01	4899.37	5160.58	1.37284	0.0428801	0.137763	0.332293	-1.58947	down
MEDP0574	Oleamide	Lipids	Free fatty acids	C18H35NO	3	0.8868	301-02-0	315704	348235	347666	846487	766627	871014	1.44979	0.00184323	0.0199783	0.407227	-1.29609	down
MEDL01843	Matairesinol	Lignans and Coumarins	Lignans	C20H22O6	3	0.8851	580-72-3	105445	113384	127985	98560.2	58078.2	104935	0.908455	0.182853	0.360696	1.32588	0.406949	insig
MW0015418	9,12,15-Octadecatrienoic acid 1-[(phosphonoxy)methyl]-1,2-ethanediyl ester	GP	PA	C39H65O8P	3	0.8826	94086-57-4	115958	83101	115816	110463	74488.8	88723.4	0.59321	0.415411	0.592268	1.15054	0.202314	insig
MEDL00352	Glu-Val	Amino acids and derivatives	Amino acids and derivatives	C10H18N2O5	3	0.88	5879-06-1	173782	169152	171592	118227	120710	118438	1.45663	2.96696e-05	0.00265935	1.43974	0.525806	insig
MEDP0594	Dihydroactinidiolide	Others	Lactones	C11H16O2	3	0.8799	15356-74-8	454043	420521	385284	525034	486771	523922	1.28536	0.0237951	0.0953931	0.82036	-0.285671	insig
MEDP0180	Nicotinamide mononucleotide	Nucleotides and derivatives	Nucleotides and derivatives	C11H15N2O8P	3	0.8789	1094-61-7	53939.5	58642.2	50683.8	43958.2	43219.4	42814.5	1.36399	0.0383267	0.128997	1.25597	0.328797	insig
MW0110047	Tropate	Organic acids	Organic acids	C9H10O3	3	0.8751	552-63-6	101851	96681.7	104213	78582.8	77040.8	82531.5	1.41483	0.0020531	0.0210639	1.27121	0.346202	insig
MW0015435	Neoxanthin	Others	Others	C40H56O4	3	0.8731	14660-91-4	22708.1	20568.2	7840.62	19992.3	13699.1	15277.8	0.090144	0.89656	0.94237	1.04386	0.0619263	insig
MEDN0563	2-Benzylsuccinic acid	Organic acids	Organic acids	C11H12O4	3	0.8726	884-33-3	8849.29	10951.7	10303.5	13189.2	13384.3	6905	0.211267	0.655783	0.780435	0.899215	-0.153261	insig
MEDN1575	Rhapontigenin	Others	Stilbene	C15H14O4	3	0.8706	500-65-2	72237	67674.7	71629.3	53002.2	56226	60248.4	1.36369	0.00749499	0.0466188	1.2482	0.319852	insig
MW0009385	Phenindione	Benzene and substituted derivatives	Benzene and substituted derivatives	C15H10O2	3	0.8665	83-12-5	38042.1	36439.4	150.24	119423	99416	96975.7	0.897854	0.00935016	0.0530237	0.236315	-2.08122	insig
MEDL02639	Axillarin	Flavonoids	Flavonols	C17H14O8	3	0.8663	5188-73-8	698570	749252	690834	1.44505e+06	1.28377e+06	784182	1.1314	0.146737	0.312426	0.608783	-0.716	insig
MEDN0234	Globotriose	Others	Saccharides	C18H32O16	3	0.8654	1109-28-0 | 33404-34-1 | 66580-68-5	6701.14	18821.7	21568.2	64483.9	69251.4	44828.6	1.27933	0.0120923	0.0617947	0.263721	-1.92291	down
MEDP0316	Homovanillic acid	Phenolic acids	Phenolic acids	C9H10O4	3	0.8648	306-08-1	203420	198496	191570	287156	287188	291966	1.45217	0.000236391	0.00716638	0.685073	-0.54567	insig
MEDL02331	3,4-Dimethoxycinnamic acid	Phenolic acids	Phenolic acids	C11H12O4	3	0.8645	14737-89-4	69179	54650.5	72255	44336.3	36558.3	44834.8	1.3078	0.0319543	0.114423	1.55958	0.641154	insig
MEDL02193	Methyl 4-hydroxycinnamate	Others	Lactones	C10H10O3	3	0.8599	19367-38-5 | 3943-97-3	757298	662293	728340	740547	677300	702046	0.186579	0.796759	0.879664	1.01323	0.0189562	insig
MEDN0017	D-Pyroglutamic acid	Amino acids and derivatives	Amino acids and derivatives	C5H7NO3	3	0.8594	4042-36-8	601428	579050	610214	406209	553773	490529	1.1181	0.111547	0.261584	1.23453	0.303956	insig
MEDL00971	L-Aspartic acid	Amino acids and derivatives	Amino acids and derivatives	C4H7NO4	3	0.8552	56-84-8	341251	177778	296400	236140	260246	249817	0.190265	0.683979	0.797745	1.09277	0.127989	insig
MEDL02189	Gramine	Alkaloids	Plumerane	C11H14N2	3	0.8536	87-52-5	222554	215739	220812	207834	206869	208352	1.38098	0.0236561	0.0952861	1.05786	0.0811508	insig
mws0059	Rutin	Flavonoids	Flavonols	C27H30O16	3	0.8458	153-18-4	98974.1	111615	203250	117149	95291.3	118449	0.515612	0.491076	0.653687	1.25069	0.322722	insig
MW0114156	D-(-)-Fructose	Others	Saccharides	C6H12O6	3	0.8419	57-48-7 | 30237-26-4 | 25702-76-5 | 139686-85-4	30765.8	25172.9	30623.3	19874.3	79306.1	70163.9	0.726429	0.273271	0.462954	0.51116	-0.968153	insig
MEDP1448	1-Stearoyl-sn-glycerol	GL	MG	C21H42O4	3	0.8414	22610-61-3	51547.5	26656.8	25575.6	48768.6	50963	27913.7	0.517988	0.51823	0.67425	0.813033	-0.298614	insig
MEDN1539	Genipin	Terpenoids	Monoterpenoids	C11H14O5	3	0.8302	6902-77-8	19360	38023.1	11854.9	4718.58	6639.49	10357.1	1.17148	0.173981	0.349872	3.18846	1.67286	up
MW0152757	Lophenol	Alcohol and amines	Alcohols	C28H48O	3	0.8271	481-25-4	99719.8	33656.4	5479.07	66271.9	15068.8	4894.93	0.279188	0.634416	0.764942	1.61018	0.687226	insig
MEDP1153	20-Hydroxyeicosatetraenoic acid	Lipids	Free fatty acids	C20H32O3	3	0.8266	79551-86-3	1093.47	1952.28	939.4	36483.3	31220.2	32659.2	1.44502	0.00170451	0.0190377	0.0397074	-4.65445	down
MW0168818	Oxybenzone	Benzene and substituted derivatives	Benzene and substituted derivatives	C14H12O3	3	0.8199	131-57-7	37.58	501.41	911.82	506.55	136.17	428.13	0.123507	0.680505	0.796226	1.35482	0.438102	insig
MEDL02383	Ethyl gallate	Phenolic acids	Phenolic acids	C9H10O5	3	0.8191	831-61-8	167392	124301	145481	132596	125717	140376	0.61848	0.415017	0.592268	1.09653	0.132947	insig
MEDL00375	Oglufanide	Amino acids and derivatives	Amino acids and derivatives	C16H19N3O5	3	0.8178	38101-59-6	82598.1	63626.5	37628	39341.1	38930.6	43760.6	0.890291	0.253675	0.44049	1.50659	0.591286	insig
MW0111330	Tridihexethyl	Benzene and substituted derivatives	Benzene and substituted derivatives	C21H36NO+	3	0.8153	60-49-1	122576	109552	140921	81125.5	140891	159297	0.0422758	0.921152	0.957701	0.978325	-0.0316136	insig
MEDL00422	PC(18:3/18:3)	GP	PC	C44H76NO8P	3	0.8136	324054-21-9	283852	559748	706453	46042.9	69017.9	28858.4	1.39192	0.0620844	0.17661	10.7703	3.42899	up
MEDP0792	Pyrrolidine	Alkaloids	Pyrrole alkaloids	C4H9N	3	0.8098	123-75-1	218202	237835	215842	117004	131526	136502	1.43072	0.000540753	0.0108941	1.74499	0.803222	insig
MW0016109	beta-Cryptoxanthin	Alcohol and amines	Alcohols	C40H56O	3	0.808	472-70-8	270.37	182.6	254.56	804.82	619.35	1506.49	1.34206	0.109754	0.260005	0.241423	-2.05036	down
MEDN1399	Benzenebutanoic acid	Organic acids	Organic acids	C10H12O2	3	0.8042	1821-12-1	108445	44741.4	44360.8	80202.8	60382.2	24240.8	0.308477	0.706867	0.814311	1.19852	0.261256	insig
MEDL02259	Caffeine	Alkaloids	Alkaloids	C8H10N4O2	3	0.8009	58-08-2	778.76	1539.44	2940.37	1295.59	878.56	4517	0.145996	0.739297	0.839391	0.785899	-0.347584	insig
MW0015645	all-trans-18-Hydroxyretinoic acid	Organic acids	Organic acids	C20H28O3	3	0.7998	63531-93-1	109363	99252.1	103177	2.02303e+06	1.94023e+06	1.89284e+06	1.45855	0.000394401	0.00913923	0.0532425	-4.23128	down
MEDP1617	L-Gulose	Others	Saccharides	C6H12O6	3	0.7982	6027-89-0	509421	504354	411407	248701	310380	218338	1.35201	0.00715987	0.0451778	1.83322	0.874382	insig
MEDP1168	1-Aminocyclopropanecarboxylic acid	Organic acids	Organic acids	C4H7NO2	3	0.7976	22059-21-8	129271	153568	133384	144962	138416	148612	0.479047	0.567918	0.71357	0.963505	-0.0536363	insig
MEDP1027	Maltol	Heterocyclic compounds	Heterocyclic compounds	C6H6O3	3	0.7956	118-71-8	1437.19	402.48	1407.33	1797.08	1071.69	2050.21	0.71855	0.283693	0.472666	0.660096	-0.599252	insig
MEDP1295	Cytarabine	Nucleotides and derivatives	Nucleotides and derivatives	C9H13N3O5	3	0.7953	147-94-4	155756	150494	188510	230050	188300	194947	1.10322	0.0884111	0.225474	0.806723	-0.309854	insig
MEDN0442	Pantetheine	Alkaloids	Alkaloids	C11H22N2O4S	3	0.7948	496-65-1	12239.3	12034	10338.5	16910.9	14593.7	18317.7	1.31945	0.0245375	0.0966497	0.694704	-0.52553	insig
MEDL02197	7-O-Methylluteolin	Flavonoids	Flavones	C16H12O6	3	0.7947	20243-59-8	742274	849112	771983	926113	810343	905610	1.01538	0.124846	0.282798	0.894515	-0.160822	insig
MW0106553	Pantethine	Alcohol and amines	Polyamines	C22H42N4O8S2	3	0.7944	16816-67-4	19089.7	14287.5	15953.3	7175.73	6729	4839.01	1.39568	0.00777413	0.0477825	2.63183	1.39607	up
MEDP0137	3,4-Dihydroxybenzaldehyde	Phenolic acids	Phenolic acids	C7H6O3	3	0.7932	139-85-5	915408	971849	979417	1.4426e+06	1.43566e+06	1.41515e+06	1.45031	0.000460348	0.00985341	0.667691	-0.582747	insig
MEDP0290	Sinapic acid	Phenolic acids	Phenolic acids	C11H12O5	3	0.7925	7362-37-0	1.49601e+06	1.38722e+06	1.48662e+06	1.54236e+06	1.46435e+06	1.43299e+06	0.347134	0.650624	0.777647	0.984265	-0.0228811	insig
MW0124205	Gambogic acid	Organic acids	Organic acids	C38H44O8	3	0.7918	2752-65-0	2730.01	2537.75	547.01	11180.8	8974.51	3765.55	1.13409	0.0998199	0.24304	0.243084	-2.04047	down
MEDL02163	15(S)-HPETE	Lipids	Free fatty acids	C20H32O4	3	0.7904	70981-96-3	31816	39610.6	28063	255498	194628	181700	1.44129	0.0144658	0.0685383	0.157464	-2.66691	down
MEDN0101	Theobromine	Alkaloids	Alkaloids	C7H8N4O2	3	0.7901	83-67-0	1090.77	21107.3	21717.5	18673.9	16342.5	17512.4	0.539117	0.713588	0.819712	0.836028	-0.258377	insig
MW0009918	Thonzylamine	Phenolic acids	Phenolic acids	C16H22N4O	3	0.7885	91-85-0	2477.82	770.44	1509.85	535.08	180.81	1997.9	0.734857	0.412248	0.591901	1.75331	0.81008	insig
MEDP0426	Xanthurenic acid	Organic acids	Organic acids	C10H7NO4	3	0.7884	59-00-7	25210.3	10596.8	29284.2	10591.2	22570.1	25931.3	0.133306	0.799243	0.880848	1.10151	0.139487	insig
MEDP1314	Monoisobutyl phthalate	Others	Lactones	C12H14O4	3	0.7869	30833-53-5	6946.7	6677.59	6085.3	22426.5	21971.7	23474	1.45528	4.51456e-05	0.00319346	0.290393	-1.78392	down
MEDL02721	Glabrene	Flavonoids	Other Flavonoids	C20H18O4	3	0.7852	60008-03-9	456184	234691	183126	868940	993161	914171	1.33192	0.00829152	0.0495677	0.314811	-1.66744	down
MEDN0163	Hypoxanthine	Nucleotides and derivatives	Nucleotides and derivatives	C5H4N4O	3	0.7848	68-94-0	50542	77057.3	85812.4	180944	215308	199295	1.38853	0.000950626	0.0140103	0.358345	-1.48058	down
MEDL01753	4-Methylesculetin	Lignans and Coumarins	Coumarins	C10H8O4	3	0.7827	529-84-0	32442.2	34352.3	33362.9	60560.1	60918.4	19643.2	0.413275	0.423917	0.598262	0.709723	-0.494672	insig
MEDP0289	3,4,5-Trimethoxycinnamic acid	Phenolic acids	Phenolic acids	C12H14O5	3	0.7826	90-50-6	2870.01	312.72	663.89	1990.13	1579.84	2829.6	0.812005	0.409611	0.589514	0.601075	-0.734384	insig
MEDN1397	Succinylacetone	Organic acids	Organic acids	C7H10O4	3	0.782	51568-18-4	58540.2	48735	53621.5	41331.6	43456.9	44813.9	1.2829	0.0532001	0.159029	1.24146	0.312042	insig
MEDL02026	4-Hydroxy-3-methoxycinnamaldehyde	Phenolic acids	Phenolic acids	C10H10O3	3	0.7818	20649-42-7	14178.6	34376.3	28416.9	22659.8	24998.4	24031.1	0.0154828	0.797168	0.879861	1.07369	0.102573	insig
MEDP0525	N-Acetyl-L-alanine	Amino acids and derivatives	Amino acids and derivatives	C5H9NO3	3	0.7807	97-69-8	2895310	2.95506e+06	2.9851e+06	2.69126e+06	2.7894e+06	2.75803e+06	1.35605	0.00724468	0.0455703	1.07244	0.100892	insig
MEDN0721	Metronidazole	Heterocyclic compounds	Heterocyclic compounds	C6H9N3O3	3	0.7798	443-48-1	28156.5	20990	27934.9	19857.9	20583.1	17048.5	1.14854	0.0917723	0.231411	1.34079	0.423086	insig
MEDP1072	N7-Methylguanosine	Nucleotides and derivatives	Nucleotides and derivatives	C11H15N5O5	3	0.7788	20244-86-4	2321.16	1520.29	805.14	9176.9	11218.2	9066.44	1.38684	0.00128586	0.0165014	0.157717	-2.66459	down
MEDP0603	4-Isopropylbenzaldehyde	Others	Aldehyde compounds	C10H12O	3	0.7786	122-03-2	5134	5143.46	4600	137340	131694	137928	1.45852	0.000207661	0.00659283	0.0365575	-4.77369	down
MEDP1604	3-Indoleacetonitrile	Alkaloids	Plumerane	C10H8N2	3	0.7782	771-51-7	196561	211197	207988	203303	198601	188825	0.813826	0.247167	0.433436	1.04235	0.0598399	insig
MEDN0056	N-Acetylleucine	Amino acids and derivatives	Amino acids and derivatives	C8H15NO3	3	0.7768	1188-21-2	2.09723e+06	2.14426e+06	2.18374e+06	2.00867e+06	1.93285e+06	1.97891e+06	1.35666	0.00754861	0.0466188	1.08527	0.118048	insig
MEDN0555	Hydroxyphenyllactic acid	Benzene and substituted derivatives	Phenolic acids	C9H10O4	3	0.7757	306-23-0	159472	164963	180423	226526	22004	225999	0.430155	0.895814	0.942064	1.06391	0.0893828	insig
MEDP0545	2-Pyrrolidinone	Heterocyclic compounds	Heterocyclic compounds	C4H7NO	3	0.7754	616-45-5	23597.5	24533.6	19642	43609.4	35134.2	38394.8	1.38145	0.00823882	0.0493595	0.578573	-0.789428	insig
MEDL00019	Theophylline	Alkaloids	Alkaloids	C7H8N4O2	3	0.7744	58-55-9	864351	880189	919468	974754	899406	988157	1.04639	0.124618	0.28244	0.930717	-0.103585	insig
MEDL02742	Delphinidin 3-sambubioside	Flavonoids	Anthocyanidins	C26H29O16+	3	0.7741	53158-73-9	1.10794e+06	1.05458e+06	1.04332e+06	1.20823e+06	1.10959e+06	1.05363e+06	0.710817	0.351797	0.537725	0.950882	-0.0726616	insig
MEDN1325	trans-2-Octenoic acid	Organic acids	Organic acids	C8H14O2	3	0.7738	1871-67-6	7900.38	273.61	823	12711.1	14620.8	6757.37	1.06777	0.0703959	0.192431	0.263924	-1.9218	down
MEDP1839	3,4-Dimethoxybenzaldehyde	Phenolic acids	Phenolic acids	C9H10O3	3	0.7737	120-14-9	199092	226857	206638	161833	144902	145457	1.39103	0.00583217	0.0401285	1.39894	0.484329	insig
MEDP0664	Tyrosine methylester	Amino acids and derivatives	Amino acids and derivatives	C10H13NO3	3	0.7724	1080-06-4	120099	113935	95140.2	172735	161125	164982	1.37712	0.00794674	0.0484739	0.659876	-0.599733	insig
MEDP1757	Ethyl vanillin	Benzene and substituted derivatives	Benzene and substituted derivatives	C9H10O3	3	0.7716	121-32-4	7246.57	10198.7	8402.46	5518.77	2982.63	6456.53	1.10164	0.0564054	0.165281	1.72803	0.789125	insig
MW0003649	3,4-Dimethylbenzoic acid	Phenolic acids	Phenolic acids	C9H10O2	3	0.7714	619-04-5	44108.4	42552	46345.2	46278.5	51103.2	43318.4	0.65773	0.386484	0.571644	0.945312	-0.0811373	insig
MEDP1606	2'-Deoxyguanosine	Nucleotides and derivatives	Nucleotides and derivatives	C10H13N5O4	3	0.7702	961-07-9	99708.7	102776	100913	104161	98532.3	97942.6	0.313775	0.702518	0.811387	1.00919	0.0131924	insig
MEDN0562	Indole-3-carbinol	Alkaloids	Plumerane	C9H9NO	3	0.7701	700-06-1	0.58	6.97	0.58	308.99	342.38	206.99	1.39147	0.0197936	0.0843635	0.00947155	-6.72218	down
MEDN1410	N-Palmitoylglycine	Amino acids and derivatives	Amino acids and derivatives	C18H35NO3	3	0.7693	158305-64-7	23202.8	22389.2	37574.3	36684.7	60414.4	73621	1.16625	0.0972399	0.238922	0.48715	-1.03756	down
MEDL02381	4-Ethylbenzoic acid	Phenolic acids	Phenolic acids	C9H10O2	3	0.7673	619-64-7	675006	659819	644084	539561	537076	532913	1.44572	0.00379767	0.0302368	1.22948	0.298048	insig
MEDP0012	Ornithine	Amino acids and derivatives	Amino acids and derivatives	C5H12N2O2	3	0.767	3184-13-2	75174.5	85605.7	86488.5	78313.7	71207.6	66525.2	1.04885	0.105801	0.253772	1.14452	0.194738	insig
MEDL00369	Glutamyl-phenylalanine	Amino acids and derivatives	Amino acids and derivatives	C14H18N2O5	3	0.7656	20556-22-3	61995.6	66997.9	68143.1	80877.6	55396.9	54416.1	0.269498	0.829327	0.899295	1.0338	0.0479613	insig
MEDL02156	Isoeugenol	Phenolic acids	Phenolic acids	C10H12O2	3	0.7653	5932-68-3	10949.8	14047.7	23380.7	18134.9	28601.8	5470.13	0.105881	0.877847	0.930867	0.926664	-0.109882	insig
MEDN1317	3,3-Dimethylglutaric acid	Organic acids	Organic acids	C7H12O4	3	0.7648	4839-46-7	7989	7707.15	1085.75	8893.24	14868.6	13802.1	0.919656	0.078613	0.208806	0.446756	-1.16244	insig
MEDN0261	Indole-3-propionic acid	Alkaloids	Plumerane	C11H11NO2	3	0.7646	830-96-6	28533.3	28840.8	20643.7	20868.5	15243.6	22681.1	0.960371	0.14287	0.306247	1.32699	0.408156	insig
MEDL02666	Icaritin	Flavonoids	Flavonols	C21H20O6	3	0.7641	118525-40-9	349.81	570.21	81.52	989.8	637.75	572.58	0.944949	0.106074	0.253988	0.455219	-1.13537	insig
MW0123891	Ethionamide	Heterocyclic compounds	Heterocyclic compounds	C8H10N2S	3	0.7627	536-33-4	151.16	43.34	67.88	14081.1	12747.6	14928.4	1.44455	0.00205134	0.0210639	0.00628348	-7.31422	down
MW0124447	Isatin	Alkaloids	Plumerane	C8H5NO2	3	0.7626	91-56-5	114713	137735	121703	129725	118522	113605	0.3414	0.650789	0.777647	1.03399	0.0482202	insig
MEDN1008	FFA(11:1)	Lipids	Free fatty acids	C11H20O2	3	0.7619	112-38-9	73549.1	17030	63841.5	206109	173487	164659	1.21938	0.00511257	0.036529	0.283728	-1.81742	down
MEDL02179	Coumarin	Lignans and Coumarins	Coumarins	C9H6O2	3	0.7618	91-64-5	20788.9	19700.2	18423.2	19145.4	14762.5	18801.8	0.789899	0.28107	0.470239	1.11768	0.160501	insig
MEDL02733	Tilarginine	Amino acids and derivatives	Amino acids and derivatives	C7H16N4O2	3	0.7614	17035-90-4	5327.22	8114.33	13923.6	12267	9523.52	13669.4	0.699039	0.410445	0.589987	0.771723	-0.373845	insig
MW0131207	3,5-Dimethoxycinnamic acid	Organic acids	Organic acids	C11H12O4	3	0.7604	16909-11-8 | 20767-04-8	9774.49	52118.2	2413.18	1930.69	5249.61	13405.4	0.481752	0.447688	0.619238	3.12381	1.64331	insig
MW0137959	Dihydrodaidzein	Flavonoids	Isoflavones	C15H12O4	3	0.7604	17238-05-0	3140.31	559.87	3339.94	9081.42	5766.59	7186.59	1.10343	0.0191558	0.0826941	0.319503	-1.6461	down
MEDP0618	Carnitine-2-methyl-C4	FA	CAR	C12H23NO4	3	0.76	31023-25-3	13618	17746.5	17117.9	18105.8	17691.6	14339.4	0.226004	0.768825	0.860333	0.967002	-0.0484085	insig
MEDN1584	Tetrahydrocurcumin	Phenolic acids	Phenolic acids	C21H24O6	3	0.7589	36062-04-1	3108.13	3496.4	4020.74	5121.14	6956.07	1119.3	0.0388479	0.669708	0.789104	0.805158	-0.312657	insig
MW0139977	Yangonin	Others	Stilbene	C15H14O4	3	0.7567	500-62-9	18174.7	772.1	13647.7	9003.58	901.73	8980.38	0.184022	0.493009	0.655494	1.72588	0.787335	insig
MW0127087	Trimethylsilyl heptadecanoate	Organic acids	Organic acids	C20H42O2Si	3	0.7562	55517-58-3	264534	127722	319413	259861	39137.9	389199	0.313239	0.95073	0.972404	1.03411	0.0483837	insig
MEDP0510	Carnitine C2:0	FA	CAR	C9H17NO4	3	0.7556	4398-79-2	16449.6	14117.4	19047.8	64336.3	100408	56179.4	1.40997	0.0508135	0.153929	0.224579	-2.15471	down
MW0122229	6-methoxy-3-(1,3-thiazol-2-yl)-1H-indole	Alkaloids	Plumerane	C12H10N2OS	3	0.7551	135531-87-2	163402	147260	163754	129258	123438	132562	1.35772	0.017432	0.0781824	1.23142	0.300326	insig
MEDP1899	Benzoylecgonine	Benzene and substituted derivatives	Benzene and substituted derivatives	C16H19NO4	3	0.755	519-09-5	57279.9	78576	318.75	93961.8	119551	96782.6	0.767092	0.118973	0.273958	0.438855	-1.18818	insig
MW0114002	Biflorin	Heterocyclic compounds	Heterocyclic compounds	C16H18O9	3	0.7545	89701-85-9	270688	480574	7834.16	165303	241748	147496	0.321006	0.670406	0.78968	1.36886	0.452975	insig
MW0136677	Fraxinol	Lignans and Coumarins	Coumarins	C11H10O5	3	0.7535	486-28-2	80539.4	6787.96	24624.2	27239	14088.2	7163.65	0.452451	0.4441	0.616177	2.30872	1.20709	insig
MEDP1196	Biotin amide	Alcohol and amines	Amines	C10H17N3O2S	3	0.7523	6929-42-6	14186.2	12997.4	18290.7	10549.6	17306.6	16523.2	0.142868	0.898338	0.943746	1.02467	0.0351577	insig
MW0108268	Methylacetoacetic acid	Others	Lactones	C5H8O3	3	0.7513	105-45-3	1.39766e+06	1.57533e+06	1.48962e+06	1.52284e+06	1.52774e+06	2.3178e+06	0.728733	0.371467	0.557616	0.831276	-0.2666	insig
MEDP1904	1-(9Z,12Z-octadecadienoyl)-glycero-3-phosphoethanolamine	GP	LPE	C23H44NO7P	3	0.7502	85046-18-0	657298	624785	639429	1.32559e+06	1.28564e+06	1.25562e+06	1.4562	0.000139485	0.00546024	0.496918	-1.00892	down
MEDP1170	9-Octadecenal	Others	Aldehyde compounds	C18H34O	3	0.7501	5090-41-5	234542	513437	234954	258575	554214	285034	0.248587	0.786885	0.871387	0.895348	-0.15948	insig
MW0118514	2-Ethyl-4-hydroxy-5-methyl-3(2H)-furanone	Others	Ketone compounds	C7H10O3	3	0.7496	27538-10-9	15137.8	6985.36	19376.3	40282	24551.7	44540.6	1.19488	0.0439642	0.139798	0.379426	-1.39811	down
MEDP0322	L-Homoserine	Amino acids and derivatives	Amino acids and derivatives	C4H9NO3	3	0.7467	672-15-1	42586.5	49429.4	52592.6	56776.9	54089	70377.8	1.07502	0.121343	0.278144	0.797867	-0.32578	insig
MEDP1152	2-Methoxy-4-vinylphenol	Phenolic acids	Phenolic acids	C9H10O2	3	0.7467	7786-61-0	209331	208512	209372	181200	175311	185024	1.42667	0.00911921	0.0522463	1.15822	0.211909	insig
MW0129932	1-O-Cinnamoyl-beta-D-gentiobiose	Benzene and substituted derivatives	Benzene and substituted derivatives	C21H28O12	3	0.746	181373-65-9	2027.47	334.01	1416.5	3008.45	3164.42	2904.48	1.03958	0.0672286	0.185662	0.416199	-1.26466	down
MEDP1614	Isopentenyl pyrophosphate	Organic acids	Organic acids	C5H12O7P2	3	0.7453	358-71-4	26706.2	4722.95	5658.67	386511	159.67	337694	0.304281	0.199559	0.381195	0.0512004	-4.2877	insig
MW0127213	Isopropyl methyl sulfide	Alcohol and amines	Alcohols	C4H10S	3	0.7451	1551-21-9	54463.8	57820.3	67963.4	76847.9	65077.6	71730.3	1.05723	0.105532	0.253277	0.843635	-0.245309	insig
MW0063534	(4,4a-dimethyl-7-oxo-6-propan-2-ylidene-2,3,4,5,8,8a-hexahydro-1H-naphthalen-2-yl) (E)-3-methylsulfanylprop-2-enoate	Terpenoids	Sesquiterpenoids	C19H28O3S	3	0.7448	36031-35-3	529.79	1009.07	420.94	1672.29	571.71	485.1	0.363476	0.588928	0.730201	0.718112	-0.477719	insig
MEDP1136	D-Fructose-6-phosphate	Others	Saccharides	C6H13O9P	3	0.7438	643-13-0	139127	134359	133769	105722	98042.4	106903	1.42488	0.00143428	0.0173664	1.3109	0.390559	insig
MW0013829	3,4-Dimethyl-5-pentyl-2-furanpropanoic acid	Organic acids	Organic acids	C14H22O3	3	0.7435	116627-39-5	208904	235150	245962	49112	189304	264672	0.665592	0.428544	0.602244	1.37156	0.45582	insig
MW0053740	Glyceryl lactooleate	GL	MG	C24H44O6	3	0.7422	30283-16-0	404676	421263	435779	374237	443976	476206	0.20348	0.757159	0.853752	0.974737	-0.0369148	insig
MEDL02212	(-)-Epicatechin gallate	Flavonoids	Flavanols	C22H18O10	3	0.7421	1257-08-5	144.16	7.18	370.96	179.5	100.32	38.29	0.111803	0.597757	0.738405	1.64188	0.715353	insig
MEDN1029	Glycyl-L-phenylalanine	Amino acids and derivatives	Amino acids and derivatives	C11H14N2O3	3	0.742	3321-03-7	6457.09	8048.57	7032.7	10028.4	1136.71	3111.2	0.764479	0.465019	0.63373	1.50868	0.593288	insig
MEDP0067	2-Acetamido-2-Deoxy-D-Mannopyranose	Others	Saccharides	C8H15NO6	3	0.7411	7772-94-3 | 1136-44-3	25371.2	27938.8	22733.7	49852.6	61447.1	15070.7	0.538472	0.351582	0.537725	0.601752	-0.732758	insig
MW0012992	1-Stearoyl-2-arachidonoyl-sn-glycero-3-phosphoserine	GP	PS	C44H78NO10P	3	0.7398	132014-80-3	22817.5	12872.2	5114.44	574539	803805	30192.2	1.17165	0.185186	0.363781	0.0289692	-5.10934	down
MEDP0658	Ethyl dodecanoate	Benzene and substituted derivatives	Benzene and substituted derivatives	C14H28O2	3	0.7395	106-33-2	26850.8	32299.5	23356.8	28215.6	26311.5	24496.3	0.252577	0.710877	0.817996	1.04409	0.0622396	insig
MEDP0396	2'-Deoxycytidine-5'-monophosphate	Nucleotides and derivatives	Nucleotides and derivatives	C9H14N3O7P	3	0.7391	1032-65-1	25138.1	26748.6	26501.8	64399.3	66375.1	62160.4	1.45633	0.000211462	0.00660941	0.406295	-1.2994	down
MEDP1278	4-Methyl-5-thiazoleethanol	Others	Others	C6H9NOS	3	0.7387	137-00-8	354597	363366	350933	287087	266025	282038	1.42958	0.00131338	0.0166526	1.27989	0.356015	insig
MEDP1611	Glutamylglutamine	Amino acids and derivatives	Amino acids and derivatives	C10H17N3O6	3	0.7386	26848-14-6	17067.5	13377.9	10460.8	16192.4	808.28	14676.9	0.56872	0.605231	0.743938	1.29133	0.368857	insig
MEDN1004	Sepiapterin	Nucleotides and derivatives	Nucleotides and derivatives	C9H11N5O3	3	0.7383	17094-01-8	86126.1	84206.2	79534.7	67130	62112.9	65114.4	1.41189	0.00221278	0.0221939	1.28561	0.36245	insig
MEDL02735	Pectolinarigenin	Flavonoids	Flavones	C17H14O6	3	0.7376	520-12-7	35.16	79.04	74.98	4448.38	3986.23	4157.76	1.4479	0.000953676	0.0140103	0.0150234	-6.05665	down
MW0006587	Cinnarizine	Benzene and substituted derivatives	Benzene and substituted derivatives	C26H28N2	3	0.7365	298-57-7	26001.3	24280.1	27554	30400.3	26770.9	32887.6	1.04308	0.134501	0.294894	0.864273	-0.210441	insig
MW0115424	Triethylene glycol monomethyl ether	Alcohol and amines	Alcohols	C7H16O4	3	0.7348	112-35-6	54324.4	124570	76643	86237	78839.7	79149.6	0.0368279	0.872851	0.92771	1.04631	0.065315	insig
MW0122702	beta-Carboline	Alkaloids	Plumerane	C11H8N2	3	0.7345	244-63-3	993.55	1268.61	2674.42	1438.88	1878.04	2347.05	0.444348	0.705788	0.813533	0.871576	-0.198302	insig
MW0011792	1-(1Z-octadecenyl)-2-(5Z,8Z,11Z,14Z-eicosatetraenoyl)-sn-glycero-3-phosphoethanolamine	Others	Others	C43H78NO7P	3	0.7341	144371-69-7	85585.8	103742	53941.9	7958.69	275.88	16864.9	1.13354	0.0281024	0.104432	9.69226	3.27683	up
MEDL00970	Thymine	Nucleotides and derivatives	Nucleotides and derivatives	C5H6N2O2	3	0.7331	65-71-4	497295	494169	431938	332640	347980	328442	1.40222	0.0171343	0.07745	1.41062	0.496328	insig
MEDL02183	Xanthotoxol	Lignans and Coumarins	Coumarins	C11H6O4	3	0.7329	2009-24-7	531.01	71.46	80.22	451.62	169.86	155.84	0.432437	0.870673	0.927001	0.878261	-0.187278	insig
MEDL02248	Carnosol	Terpenoids	Ditepenoids	C20H26O4	3	0.7318	5957-80-2	1844.41	535.92	1069.82	56760.4	45055.1	44797.2	1.43345	0.00637816	0.0420914	0.0235324	-5.40921	down
Lmsn002815	Nicotiflorin	Flavonoids	Flavonols	C27H30O15	3	0.7306	17650-84-9	4537.78	18023.2	16112.2	20164.4	14230.5	17658	0.646882	0.407873	0.588221	0.742959	-0.428646	insig
MEDN0037	Dopamine	Alkaloids	Phenolamine	C8H11NO2	3	0.7306	62-31-7	3438.77	2159.13	2430.83	1669.69	1251.17	427.63	1.09911	0.0432827	0.138395	2.39772	1.26166	up
MW0123213	Carbadox	Alkaloids	Alkaloids	C11H10N4O4	3	0.7306	6804-07-5	85886.3	80099.4	51291.7	66189.4	57518.1	44467.6	0.764363	0.273006	0.462954	1.29197	0.369574	insig
MW0111434	1-(4-Hydroxy-2,6,6-trimethyl-1-cyclohexen-1-yl)-2-buten-1-one	Others	Ketone compounds	C13H20O2	3	0.7298	35734-61-3	325.75	311.32	324.14	467.66	805.69	555.91	1.29358	0.1034	0.249348	0.525464	-0.928337	insig
MEDN1402	3,4-Dihydroxyhydrocinnamic acid	Phenolic acids	Phenolic acids	C9H10O4	3	0.7297	1078-61-1	294987	305628	305145	346898	418747	409529	1.3202	0.0547022	0.16214	0.770746	-0.375673	insig
MW0153300	Madecassic acid	Terpenoids	Triterpene	C30H48O6	3	0.7295	18449-41-7	65010.5	75967.2	82602.1	43869	43390.8	37505.6	1.39827	0.0136785	0.0664414	1.792	0.841572	insig
MW0061638	(25S)-25,27-Dihydrophysalin A	Steroids	Steroid	C28H32O10	3	0.729	120849-18-5	8687.37	2693.07	14712.4	13613.5	7571.19	11303.5	0.521686	0.622289	0.756656	0.803148	-0.316262	insig
MW0107605	Jubanine B	Benzene and substituted derivatives	Benzene and substituted derivatives	C43H47N5O6	3	0.7287	60375-08-8	3888.58	3598.76	811.99	5831.73	3684.87	6787.52	0.900682	0.118192	0.272759	0.509033	-0.97417	insig
MEDN1328	Hydroxyisocaproic acid	Organic acids	Organic acids	C6H12O3	3	0.7283	13748-90-8	10457	9303.23	107.84	12360.4	12137.3	13231.2	0.731969	0.209622	0.395136	0.5266	-0.925222	insig
MEDN1363	l-Alanyl-l-glutamine	Amino acids and derivatives	Amino acids and derivatives	C8H15N3O4	3	0.7276	39537-23-0	76.3	159.32	40.78	4281.51	3827.38	3858.93	1.43005	0.000826201	0.0130127	0.0230953	-5.43626	down
MW0000921	[2-(Dimethoxymethyl)-1-heptenyl]benzene	Benzene and substituted derivatives	Benzene and substituted derivatives	C16H24O2	3	0.7274	91-87-2	9225.6	11616.9	10724.1	6684.56	10152.6	7979.17	0.97832	0.150086	0.31715	1.27201	0.347107	insig
MW0061670	Phytonadiol	Terpenoids	Ditepenoids	C31H48O2	3	0.7274	572-96-3	216.22	1390.66	794.72	11858	12385.5	11670.9	1.36705	4.14861e-05	0.00304131	0.0668702	-3.90249	down
MEDP0617	N-(2-Furoyl)glycine	Amino acids and derivatives	Amino acids and derivatives	C7H7NO4	3	0.7264	5657-19-2	622717	525667	544690	764476	811729	856158	1.38313	0.00360281	0.0289951	0.696062	-0.522713	insig
MEDN0226	Erythrono-1,4-lactone	Others	Lactones	C4H6O4	3	0.7261	17675-99-9	8146.38	9214.56	8045.2	2089.91	1403.79	210.42	1.24088	0.00077141	0.0129059	6.85889	2.77797	up
MW0062070	Piperitone	Terpenoids	Terpene	C10H16O	3	0.7257	89-81-6	1.17067e+06	1.31382e+06	1.34855e+06	1.35503e+06	1.35338e+06	3.2081e+06	0.748363	0.377809	0.564404	0.647854	-0.626259	insig
MEDL01830	(1E)-1,7-bis(4-hydroxy-3-methoxyphenyl)hept-1-ene-3,5-dione	Phenolic acids	Phenolic acids	C21H22O6	3	0.7254	76474-56-1	27822.7	26912.1	27960.1	15037.2	5196.26	14056	1.19568	0.0343899	0.120365	2.41167	1.27003	up
MEDN1192	2',6'-Dihydroxyacetophenone	Phenolic acids	Phenolic acids	C8H8O3	3	0.7252	699-83-2	17995.2	14806.5	23478.9	19455.1	13025.6	25435.1	0.0306597	0.907763	0.949443	0.971767	-0.0413182	insig
MW0108071	Lysylproline	Amino acids and derivatives	Amino acids and derivatives	C11H21N3O3	3	0.7248	52766-27-5	415956	386056	400055	339595	326627	314546	1.3961	0.00312482	0.0270789	1.22564	0.293535	insig
MEDN0724	Aspirin	Organic acids	Organic acids	C9H8O4	3	0.7246	50-78-2	52.68	24.02	75.57	172.64	68.4	62.45	0.856985	0.294184	0.483748	0.50173	-0.995017	insig
FDATN00564	Nordihydroguaiaretic acid	Benzene and substituted derivatives	Benzene and substituted derivatives	C18H22O4	3	0.7216	500-38-9 | 27686-84-6	85867.5	81049.4	70322.4	44453	40416.1	47937.7	1.40982	0.00747339	0.0466188	1.78635	0.837015	insig
MEDP1286	Geranyl acetate	Others	Lactones	C12H20O2	3	0.7209	105-87-3	2886.18	1991.84	2777.48	5240.12	5172.39	5229.31	1.38806	0.0106888	0.0575827	0.489425	-1.03084	down
MEDN1709	2-Octanamidoacetic acid	Amino acids and derivatives	Amino acids and derivatives	C10H19NO3	3	0.7201	14246-53-8	351.5	165.75	512.28	766.27	481.68	337.42	0.735538	0.316751	0.506037	0.649394	-0.622834	insig
MW0123795	Dyphylline	Alkaloids	Alkaloids	C10H14N4O4	3	0.7199	479-18-5	5883.88	8298.54	3502.75	1350.92	5022.52	6627.61	0.546597	0.496524	0.657146	1.36029	0.443912	insig
MW0137290	Aflatoxin M1	Heterocyclic compounds	Heterocyclic compounds	C17H12O7	3	0.7194	6795-23-9 | 25325-49-9	66157.2	163839	86012.9	90522.9	81038.4	257666	0.364354	0.600258	0.740135	0.736229	-0.441774	insig
MW0138724	Kuwanon L	Flavonoids	Other Flavonoids	C35H30O11	3	0.7186	88524-65-6	1450.51	722.12	700.69	263.13	40.65	403.18	1.10181	0.082819	0.216229	4.06433	2.02302	up
MEDN0084	Benzoic acid	Phenolic acids	Phenolic acids	C7H6O2	3	0.7181	65-85-0	26651	27946	25763	27446.8	30848.5	28262.4	0.957981	0.175849	0.351873	0.928399	-0.107183	insig
MW0001818	2-(3,4-Dihydroxyphenylethyl)-6-epi-elenaiate	Phenolic acids	Phenolic acids	C19H22O8	3	0.7178	50915-70-3	6083.14	6311.44	4412.03	3119.42	6971.28	4013.19	0.564468	0.540884	0.692779	1.19163	0.252936	insig
MEDL00917	LPE(0:0/20:4)	GP	LPE	C28H50NO7P	3	0.7167	83799-24-0	2765.68	1837.78	2374.74	629.83	1191.34	1217.97	1.26509	0.0200289	0.0846503	2.29611	1.19919	up
MW0009375	Phenbenzamine	Benzene and substituted derivatives	Benzene and substituted derivatives	C17H22N2	3	0.7157	961-71-7	23991.7	24654.8	28358.4	23194.1	19975.2	25755.8	0.777615	0.282081	0.470952	1.11723	0.159922	insig
MEDN1386	Erythritol	Others	Saccharides	C4H10O4	3	0.7154	149-32-6	148604	132032	130386	110519	100361	98191.5	1.36007	0.011768	0.0610661	1.32986	0.411279	insig
MEDP0150	2'-Deoxyinosine	Nucleotides and derivatives	Nucleotides and derivatives	C10H12N4O4	3	0.715	890-38-0	43467.8	44433	52262.8	45038.4	45247.3	44918.2	0.393471	0.613001	0.748976	1.03668	0.0519755	insig
MW0011264	(3R,7R)-1,3,7-Octanetriol	FA	Others	C8H18O3	3	0.7142	217650-11-8	19595.6	14588.7	25535.3	17328.4	7252.51	8279.75	1.04639	0.117571	0.271963	1.81736	0.861841	insig
MEDL02722	Polydatin	Others	Stilbene	C20H22O8	3	0.714	27208-80-6	5270.16	3820.74	1859.51	8677.71	6792.16	12599.5	1.18598	0.0583349	0.16897	0.39012	-1.35801	down
MEDP1645	Benzamide	Phenolic acids	Phenolic acids	C7H7NO	3	0.7134	55-21-0	396925	392142	404530	402598	423695	410050	1.03365	0.134092	0.294316	0.965426	-0.0507625	insig
MEDP0653	2-Propenoic acid, 3-phenyl-, phenylmethyl ester	Benzene and substituted derivatives	Benzene and substituted derivatives	C16H14O2	3	0.7127	103-41-3 | 8014-16-2	3822.22	3614.37	3254.75	1170.65	1037.78	1012.6	1.45049	0.00241356	0.0230603	3.31923	1.73085	up
MEDN0052	N6-Acetyl-L-lysine	Amino acids and derivatives	Amino acids and derivatives	C8H16N2O3	3	0.7121	692-04-6	139029	143543	131983	125944	124208	130714	1.2049	0.058221	0.168883	1.08845	0.122282	insig
MEDP0654	2-Phenylacetamide	Alkaloids	Alkaloids	C8H9NO	3	0.7114	103-81-1	428726	413038	446571	351748	385428	347653	1.32543	0.0127945	0.0638459	1.18759	0.24804	insig
MW0011884	PE(18:2(9Z,12Z)/18:2(9Z,12Z))	GP	PE	C41H74NO8P	3	0.7109	20707-71-5	194.25	546.89	377.96	989.4	3447.25	674.38	1.108	0.267438	0.456911	0.218958	-2.19128	down
MEDL02655	Albanol B	Flavonoids	Flavones	C34H22O8	3	0.7108	87084-99-9	74651.1	67316.1	86998.9	89304.5	85329.8	123176	0.991493	0.187313	0.366447	0.768832	-0.379259	insig
MEDN1492	(R)-mandelic Acid	Organic acids	Organic acids	C8H8O3	3	0.7106	611-71-2	12859.6	10913.6	9047.64	11273.6	10262.1	11859.4	0.169588	0.883986	0.934744	0.982802	-0.0250269	insig
MEDN0477	2-Oxovaleric acid	Organic acids	Organic acids	C5H8O3	3	0.7106	1821-02-9	706.8	445.21	890.68	794.66	1485.46	625.91	0.64415	0.400372	0.582149	0.702914	-0.508579	insig
MEDL02650	Cyclomorusin	Flavonoids	Other Flavonoids	C25H22O6	3	0.71	62596-34-3	319588	347805	394310	280909	271992	337158	1.02026	0.128002	0.286248	1.19285	0.254408	insig
MEDN0060	N-Isovaleroylglycine	Amino acids and derivatives	Amino acids and derivatives	C7H13NO3	3	0.71	16284-60-9	1010.12	112.13	372.44	571.71	301.89	232.17	0.0181563	0.68572	0.799081	1.35172	0.434795	insig
MEDL01930	Bis-ferulamidobutane	Alkaloids	Phenolamine	C24H28N2O6	3	0.7099	42369-86-8	37619.2	38987.2	26994.4	43416.7	51475.7	40710.7	1.04022	0.100656	0.24478	0.764001	-0.388354	insig
MEDL02562	Euscaphic acid	Terpenoids	Triterpene	C30H48O5	3	0.7095	53155-25-2	188.64	1690.14	464.07	551.34	835.51	1055.58	0.417418	0.950631	0.972404	0.959229	-0.0600526	insig
MW0130099	Leukoefdin	Benzene and substituted derivatives	Benzene and substituted derivatives	C15H14O8	3	0.7092	491-52-1 | 12764-74-8	94222.8	127503	133282	115993	114472	113978	0.125119	0.799696	0.880976	1.03067	0.0435822	insig
MEDP0129	Phenethylamine	Alkaloids	Alkaloids	C8H11N	3	0.7087	64-04-0	13389.4	11853.7	11610	16487	17159.3	14636.3	1.31342	0.0180754	0.0799125	0.763278	-0.389719	insig
MW0113144	4-O-Methyl-a-D-glucosyl-(1->2)-b-D-xylosyl-(1->4)-D-xylose	Others	Saccharides	C17H28O15	3	0.7084	10365-86-3	1611.84	614.18	1544.34	825.77	1354.49	2274.35	0.282912	0.691539	0.803773	0.846395	-0.240597	insig
MW0011239	Dihydroroseoside	Others	Ketone compounds	C19H32O8	3	0.7071	142235-28-7	163849	139994	115443	104437	66988.3	74755.4	1.24023	0.0348331	0.121069	1.70316	0.768214	insig
MEDP0178	Uracil	Nucleotides and derivatives	Nucleotides and derivatives	C4H4N2O2	3	0.7068	66-22-8	32368.1	32754.4	32551.6	27051.3	25714.9	22896.5	1.36204	0.025927	0.0996545	1.29091	0.368394	insig
MW0124719	L-Tryptophanamide	Alcohol and amines	Amines	C11H13N3O	3	0.7064	20696-57-5	37683.3	40047.6	40550.6	18799.7	17688.6	48323.3	0.823269	0.381811	0.567858	1.39464	0.47989	insig
MEDL02217	Moupinamide	Alkaloids	Phenolamine	C18H19NO4	3	0.7061	66648-43-9	531.91	617.47	682.99	1393.1	765.31	1012.53	1.18568	0.12767	0.285663	0.577863	-0.7912	insig
MEDL00926	Paraxanthine	Nucleotides and derivatives	Nucleotides and derivatives	C7H8N4O2	3	0.7048	611-59-6	292940	313196	294500	267767	267912	295344	1.05117	0.115551	0.268067	1.08377	0.116057	insig
MW0001678	1-nitrosonaphthalene	Benzene and substituted derivatives	Benzene and substituted derivatives	C10H7NO	3	0.7045	21711-65-9	16805.7	20149.6	20323.8	18743	19594.6	21235.5	0.406095	0.608535	0.746117	0.961493	-0.0566515	insig
MEDL01767	Damascenone	Others	Ketone compounds	C13H18O	3	0.7044	23696-85-7	94.75	184.41	109.48	263.42	15.91	310.23	0.0955671	0.545479	0.695646	0.659203	-0.601204	insig
MEDL01832	(-)-Arctigenin	Lignans and Coumarins	Lignans	C21H24O6	3	0.7042	7770-78-7	42031.2	2174.97	10632.4	10756.9	3706.56	10049.4	0.230798	0.493655	0.655494	2.23713	1.16165	insig
MW0005946	Acetohexamide	Alcohol and amines	Amines	C15H20N2O4S	3	0.7036	968-81-0	5419.52	4597.31	5177.86	9904.06	8028.08	7533.75	1.36574	0.0312188	0.112488	0.596668	-0.744999	insig
MEDP1061	o-Tyrosine	Amino acids and derivatives	Amino acids and derivatives	C9H11NO3	3	0.703	2370-61-8	408740	361194	332057	435761	421811	458067	1.18366	0.0674657	0.185934	0.837609	-0.255652	insig
MEDP0652	Methyl cinnamate	Benzene and substituted derivatives	Benzene and substituted derivatives	C10H10O2	3	0.7021	103-26-4 | 1754-62-7	3221.34	1071.05	5837.12	5547.23	3559.77	829.93	0.0658044	0.975205	0.986955	1.01938	0.0276923	insig
MW0124481	Isoniazid	Heterocyclic compounds	Heterocyclic compounds	C6H7N3O	3	0.7015	54-85-3	11639.2	4527.64	6975.97	5687.82	9370.52	5438.72	0.17684	0.739923	0.839391	1.12908	0.175146	insig
MW0118570	2-Hexylbenzothiazole	Benzene and substituted derivatives	Benzene and substituted derivatives	C13H17NS	3	0.7007	65718-88-9	37008.8	41728.3	38657.3	23575.1	21770.6	28614.8	1.36464	0.00630825	0.0419026	1.58726	0.666539	insig
MEDP0369	Pyridoxamine	Alkaloids	Alkaloids	C8H12N2O2	3	0.7007	85-87-0	172534	269241	262191	465236	438222	491898	1.34465	0.00749582	0.0466188	0.504506	-0.987055	insig
MW0138571	Meloside A	Flavonoids	Flavones	C27H30O15	3	0.7002	60767-80-8 | 189033-11-2	4.11706e+07	4.08566e+07	3.9358e+07	4.76541e+07	4.93259e+07	4.45981e+07	1.34202	0.0267224	0.101359	0.857373	-0.222006	insig
MEDN0842	L-Methionine sulfoximine	Amino acids and derivatives	Amino acids and derivatives	C5H12N2O3S	3	0.6989	15985-39-4	24656.8	27397.7	25937.8	50789.9	42261.2	67169.9	1.35768	0.062712	0.177773	0.486779	-1.03866	down
MW0110126	L-Methionine, L-tryptophyl-	Amino acids and derivatives	Amino acids and derivatives	C16H21N3O3S	3	0.6985	21438-63-1	305889	322538	318095	237727	283158	241996	1.28955	0.0400462	0.132458	1.24072	0.311179	insig
MEDL00096	2-Methylglutaric acid	Organic acids	Organic acids	C6H10O4	3	0.6982	617-62-9	93608.7	91503.7	101714	117750	110063	99845.1	1.09819	0.102423	0.247953	0.875382	-0.192015	insig
MW0139314	Petunidin 3-galactoside	Flavonoids	Anthocyanidins	C22H23O12+	3	0.6976	28500-02-9	778.4	582.4	4490.79	10691.2	610.59	6928.81	0.622187	0.296359	0.485754	0.320976	-1.63946	insig
MW0144895	Allopurinol riboside	Nucleotides and derivatives	Nucleotides and derivatives	C10H12N4O5	3	0.6968	16220-07-8	1502.87	1800.52	376.24	1394.99	455.4	2099.84	0.0969158	0.895472	0.942064	0.931498	-0.102376	insig
MEDP1660	Bis(2-ethylhexyl) adipate	Others	Lactones	C22H42O4	3	0.6961	103-23-1	52763.6	62642	67529.8	159157	441282	110790	1.18995	0.229449	0.413905	0.257211	-1.95898	down
MW0145973	Asn-Glu	Amino acids and derivatives	Amino acids and derivatives	C9H15N3O6	3	0.6961	20917-58-2	1476.47	2484.5	3942.89	69.64	1345.61	1067.19	0.935125	0.110762	0.260974	3.18391	1.6708	insig
MW0168377	Busulfan	Organic acids	Organic acids	C6H14O6S2	3	0.6954	55-98-1	292.69	309.47	372.89	182.34	72.39	429.01	0.726056	0.456314	0.626229	1.42605	0.512028	insig
Hmyn007168	LysoPG 16:0	Lipids	Glycerol ester	C22H45O9P	3	0.6954	116870-26-9	444657	19445.7	387274	465612	47119.3	527103	0.23092	0.7707	0.860554	0.818762	-0.288485	insig
MW0106945	alpha-Glutamylaspartic acid	Amino acids and derivatives	Amino acids and derivatives	C9H14N2O7	3	0.6951	3918-84-1	856.69	795.59	362.68	2194.49	1070.8	1753.85	1.17225	0.0736085	0.198654	0.401455	-1.31669	down
MW0133725	4-Methylumbelliferyl acetate	Lignans and Coumarins	Coumarins	C12H10O4	3	0.6942	2747-05-9	7387.5	7516.6	14816.4	7976.29	10790.5	6864.44	0.2971	0.652139	0.778167	1.15954	0.213558	insig
MEDP1080	Glycyltryptophan	Amino acids and derivatives	Amino acids and derivatives	C13H15N3O3	3	0.6939	2390-74-1	262015	13988.4	274603	344374	326332	374226	0.778954	0.188837	0.368535	0.52693	-0.924316	insig
MEDN0610	2,3-Dinor-TXB2	Lipids	Free fatty acids	C18H30O6	3	0.6937	63250-09-9	97850.9	107371	129449	78239.6	91948.9	138835	0.382096	0.706179	0.813751	1.08299	0.115026	insig
MEDP0556	7-Methoxycoumarin	Lignans and Coumarins	Coumarins	C10H8O3	3	0.6936	531-59-9	1168.73	2365.75	11748.5	2015.91	3355.07	4478.39	0.0232549	0.645395	0.774013	1.55167	0.633825	insig
MW0109774	Suberylglycine	Amino acids and derivatives	Amino acids and derivatives	C10H17NO5	3	0.6935	60317-54-6	203877	235868	137394	199129	161605	195081	0.0715629	0.836923	0.903715	1.03837	0.0543161	insig
MW0121600	5-Methoxytryptophol	Amino acids and derivatives	Amino acids and derivatives	C11H13NO2	3	0.693	712-09-4	62981.7	64851.3	59752	185880	151923	139659	1.43323	0.0188981	0.0818442	0.392879	-1.34784	down
MW0009727	Deprenyl	Benzene and substituted derivatives	Benzene and substituted derivatives	C13H17N	3	0.6922	14611-51-9	15399.8	21417.5	25587	3487.52	25882.9	40902.8	0.256502	0.835051	0.903145	0.888026	-0.171327	insig
MW0103416	6-Methylthiopurine 5'-monophosphate ribonucleotide	Nucleotides and derivatives	Nucleotides and derivatives	C11H15N4O7PS	3	0.691	7021-52-5	10095	15050.3	7348.4	73324.2	67552.1	60653.5	1.42174	0.000562544	0.0111185	0.161235	-2.63276	down
MEDP0812	5-Methyl-2-furancarboxaldehyde	Others	Aldehyde compounds	C6H6O2	3	0.6903	620-02-0	158299	173738	160161	135668	140046	141817	1.35839	0.0247707	0.0970808	1.17883	0.237353	insig
MW0113976	beta-CYCLODEXTRIN	Others	Saccharides	C42H70O35	3	0.6902	7585-39-9 | 37331-89-8 | 79647-56-6	3192.24	6786.79	4336.03	1421.3	3640.46	3731.52	0.82295	0.237468	0.422945	1.62795	0.70306	insig
MEDL02307	p-Coumaroylagmatine	Alkaloids	Phenolamine	C14H20N4O2	3	0.6893	7295-86-5	338775	324051	324548	312440	279570	287772	1.23734	0.0493012	0.151165	1.12229	0.166448	insig
MEDN0040	Glyc-Pro	Amino acids and derivatives	Amino acids and derivatives	C7H12N2O3	3	0.689	704-15-4	7465.96	7429.5	8772.19	8704.61	8227.22	8013.75	0.610049	0.449505	0.620375	0.948771	-0.0758677	insig
MEDP1644	Aniline	Alkaloids	Alkaloids	C6H7N	3	0.6888	62-53-3	8595.83	3449.64	13086.3	4278.03	706.5	3056.29	0.986796	0.167139	0.340307	3.12553	1.6441	insig
MEDN0689	2,5-Furandicarboxylic acid	Others	Lactones	C6H4O5	3	0.6883	3238-40-2	227283	177557	167678	283931	287524	303179	1.33453	0.0233696	0.0945096	0.654581	-0.611357	insig
MEDP0232	N-Acetyl-D-glucosamine	Alcohol and amines	Amines	C8H15NO6	3	0.6882	7512-17-6	28238.8	8745.1	32209.8	11023	30276.5	30845.2	0.116982	0.924527	0.959467	0.959096	-0.0602536	insig
MEDL01873	[8]-Gingerdione	Phenolic acids	Phenolic acids	C19H28O4	3	0.6876	77334-06-6	53227.7	31388.3	35393.8	31114.3	9515.34	18108.6	1.06093	0.0906975	0.229131	2.04313	1.03078	up
MEDP0537	LPC(O-16:0/2:0)	Lipids	LPC	C26H54NO7P	3	0.6871	74389-68-7	649699	663445	642552	754566	789233	717994	1.35509	0.0299396	0.109048	0.864667	-0.209784	insig
MW0010475	2,3-Dehydrosilybin	Lignans and Coumarins	Lignans	C25H20O10	3	0.6843	25166-14-7	6338.55	2820.29	4994.14	19644.6	11222.1	6011.7	1.06854	0.191	0.370959	0.383774	-1.38167	down
MEDP1102	Carnitine C10:0	FA	CAR	C17H33NO4	3	0.6843	1492-27-9	4746	1440.82	5935.95	74.54	218.14	2882.13	1.01212	0.150062	0.31715	3.81842	1.93298	up
MEDN1606	N-Acetylarylamine	Benzene and substituted derivatives	Benzene and substituted derivatives	C8H9NO	3	0.6842	55576-55-1	132353	116874	121857	202147	196270	187142	1.43389	0.000350531	0.0086468	0.633727	-0.658067	insig
MEDP1467	5-Methyl-2'-deoxycytidine	Nucleotides and derivatives	Nucleotides and derivatives	C10H15N3O4	3	0.684	838-07-3	2.74	3.76	392.46	4247.95	4123.64	3784.75	1.26234	3.35074e-05	0.00281462	0.0328191	-4.92932	down
MW0109227	Phenylalanylserine	Amino acids and derivatives	Amino acids and derivatives	C12H16N2O4	3	0.6837	16053-39-7	15371.6	15343.1	13450.4	8845.44	9192.53	7903.95	1.41935	0.00269404	0.0247999	1.70246	0.767621	insig
MW0157439	Tetrahydrofolic acid	Organic acids	Organic acids	C19H23N7O6	3	0.6828	135-16-0	8014.01	8588.12	13762.2	7554.35	10353.3	7474.78	0.542218	0.478827	0.643956	1.19627	0.258549	insig
MW0005999	alpha-Hydroxyhippuric acid	Benzene and substituted derivatives	Benzene and substituted derivatives	C9H9NO4	3	0.6824	16555-77-4	35905.3	35450.2	34716	24302.1	21027.7	25047.1	1.41014	0.0070331	0.0446823	1.50719	0.591863	insig
MEDP0790	4-Methoxybenzaldehyde	Phenolic acids	Phenolic acids	C8H8O2	3	0.6818	123-11-5	221145	241134	207087	189356	316470	218154	0.253913	0.687082	0.800322	0.924563	-0.113156	insig
MW0130752	Murrangatin	Others	Ketone compounds	C15H16O5	3	0.6798	88546-96-7 | 37126-91-3	81614	77781.3	78341.4	49644.2	53417.4	55034.3	1.43903	0.000290559	0.00809148	1.50375	0.588566	insig
MEDP0247	Nicotinuric acid	Amino acids and derivatives	Amino acids and derivatives	C8H8N2O3	3	0.6797	583-08-4	679449	690068	274034	471717	816362	760003	0.531782	0.483154	0.647733	0.802483	-0.317458	insig
MEDP0823	L-3-Phenyllactic acid	Organic acids	Organic acids	C9H10O3	3	0.6797	20312-36-1	12507.6	8181.06	12435.6	4135.25	6033.02	5392.87	1.31515	0.0407628	0.13384	2.12866	1.08994	up
MW0052879	Farnesol	Alcohol and amines	Alcohols	C15H26O	3	0.6795	4602-84-0	2568.78	8271.72	8269.67	1945.16	5587.12	7886.4	0.297587	0.657272	0.781516	1.23942	0.309661	insig
MW0106832	Glutaminylalanine	Amino acids and derivatives	Amino acids and derivatives	C8H15N3O4	3	0.6789	16874-70-7	6771.07	8177.17	7384.72	4708.46	5679.75	2539.19	1.12088	0.0603675	0.17324	1.72757	0.788742	insig
MEDL02246	Angelicin	Lignans and Coumarins	Coumarins	C11H6O3	3	0.6785	523-50-2	22761.4	12407.5	12411.1	8368.84	8213.51	10098	1.14597	0.177655	0.354176	1.78334	0.834579	insig
MEDP1593	S-Lactoylglutathione	Organic acids	Organic acids	C13H21N3O8S	3	0.6783	25138-66-3	351387	340553	347146	420470	428298	445382	1.43696	0.00275473	0.0250431	0.80291	-0.316689	insig
MW0014757	5-Geranyloxy-7-methoxycoumarin	Lignans and Coumarins	Coumarins	C20H24O4	3	0.6772	7380-39-4	101.31	38.06	554.93	482.43	326.77	80.05	0.432172	0.763696	0.8582	0.78077	-0.35703	insig
MW0107319	His-Met	Amino acids and derivatives	Amino acids and derivatives	C11H18N4O3S	3	0.677	2488-11-1	1.07959e+06	1.38485e+06	1.1269e+06	1.21975e+06	1.354e+06	1.241e+06	0.532205	0.528608	0.683125	0.941438	-0.0870623	insig
MW0013350	27-Norcholestanehexol	Alcohol and amines	Alcohols	C26H46O6	3	0.6767	91999-66-5	16890.8	9836.32	16331.6	13067.1	6191.78	14242.1	0.599125	0.399889	0.582025	1.28529	0.362097	insig
MW0137454	Avenanthramide A	Alkaloids	Phenolamine	C16H13NO5	3	0.6764	108605-70-5	16321.7	10418	8416.9	17365	11536.2	17167.9	0.765321	0.301228	0.490041	0.763127	-0.390005	insig
MW0116932	1-deoxy-D-xylulose	Others	Saccharides	C5H10O4	3	0.6764	60299-43-6	95178.2	85294.4	110314	92484.1	53249.3	82041.9	0.855079	0.216374	0.401112	1.27664	0.35235	insig
MEDL01954	2'-Hydroxygenistein	Flavonoids	Isoflavones	C15H10O6	3	0.6763	1156-78-1	6769.57	13531.9	21048.6	12624.9	7358.87	5118.62	0.706342	0.329648	0.516462	1.64725	0.720062	insig
MW0009160	Noroxycodone	Benzene and substituted derivatives	Benzene and substituted derivatives	C17H19NO4	3	0.6759	57664-96-7	203.36	2269.25	2429.65	26313.3	17479.8	22386.6	1.28268	0.0107295	0.0575827	0.074075	-3.75487	down
MW0157012	L-Seryl-L-lysine	Amino acids and derivatives	Amino acids and derivatives	C9H19N3O4	3	0.6753	22677-61-8	5077.19	8015.13	9885.28	1772.24	973.76	629.88	1.37103	0.0366936	0.125168	6.8064	2.76689	up
MEDP0637	Phenylalanylproline	Amino acids and derivatives	Amino acids and derivatives	C14H18N2O3	3	0.6752	7669-65-0	13027.8	24274.8	23461.3	4903.55	21385.7	19325.2	0.563577	0.47423	0.640783	1.33212	0.413724	insig
MW0137409	Artemetin	Flavonoids	Flavones	C20H20O8	3	0.6733	479-90-3	27319.3	10824.2	36077.5	61209.8	56144.7	68405.8	1.18708	0.022053	0.090329	0.399553	-1.32354	down
MW0127740	2-Phenylpropionate	Organic acids	Organic acids	C9H10O2	3	0.6733	492-37-5	15756.5	19356.8	9782.67	4337.43	7156.58	12345.5	0.999948	0.12867	0.286747	1.88325	0.913226	insig
MEDL02658	moracin N	Phenolic acids	Phenolic acids	C19H18O4	3	0.6728	135248-05-4	137838	147581	166612	120981	114436	93361.4	1.25124	0.025776	0.0995894	1.37488	0.459311	insig
MW0113877	a-L-Fucopyranosyl-(1->2)-b-D-galactopyranosyl-(1->2)-D-xylose	Others	Saccharides	C17H30O14	3	0.6719	130136-27-5	3550.28	2125.81	1751.15	797.18	1573.85	741.49	1.18285	0.102453	0.247953	2.38625	1.25474	up
MW0140049	Laudanidine	Alkaloids	Isoquinoline alkaloids	C20H25NO4	3	0.6719	301-21-3	58.85	1404.92	1642.89	1340.08	843.27	1083.1	0.463832	0.925636	0.959919	0.951081	-0.0723592	insig
MW0117278	1-Piperidinecarboxaldehyde	Heterocyclic compounds	Heterocyclic compounds	C6H11NO	3	0.6719	2591-86-8	69238.9	42581.4	63952.7	64735.9	52505.5	53212.8	0.0612197	0.857805	0.918292	1.0312	0.0443295	insig
MEDL02759	2-Hydroxyglutarate	Organic acids	Organic acids	C5H8O5	3	0.6717	2889-31-8	7083.04	34123.8	9127.67	9002.04	11258.2	8704.62	0.431109	0.499004	0.659019	1.73778	0.797246	insig
MW0105439	Adouetine X	Amino acids and derivatives	Amino acids and derivatives	C28H44N4O4	3	0.6716	19542-37-1	1359.43	12286.1	28208	51376	5769.09	58348.6	0.663443	0.275322	0.465059	0.362388	-1.46439	insig
MW0052594	Ercalcitriol	Alcohol and amines	Alcohols	C28H44O3	3	0.6715	60133-18-8	944.27	2293.76	2714.78	199.5	1486.64	1190.72	0.799437	0.202238	0.385362	2.0692	1.04908	insig
MW0133699	4'-Methoxychalcone	Flavonoids	Chalcones	C16H14O2	3	0.6715	22966-19-4	157758	174154	165785	158738	161920	161415	0.686056	0.386331	0.571644	1.03241	0.0460177	insig
MEDP0675	2-Methylpyridine	Alkaloids	Pyridine alkaloids	C6H7N	3	0.6711	109-06-8	26634.2	29363.3	25852.3	26072.8	21589	23341.8	1.06797	0.101036	0.245467	1.15276	0.205086	insig
MW0108032	Lys-Arg	Amino acids and derivatives	Amino acids and derivatives	C12H26N6O3	3	0.6709	29586-66-1	24522.8	25360.4	16435.7	31983.2	21654	18856.2	0.277083	0.698341	0.808254	0.914827	-0.128429	insig
MEDL02631	Cassitoroside	Quinones	Quinones	C25H32O14	3	0.6707	170384-73-3	935.43	3775.85	3468.78	3751.8	557.28	4242.44	0.098583	0.936915	0.964439	0.956562	-0.0640695	insig
MEDP0587	N-Alpha-acetyllysine	Amino acids and derivatives	Amino acids and derivatives	C8H16N2O3	3	0.67	152473-69-3	89189.1	102995	85738.6	86930.8	84880.3	86664	0.766839	0.343559	0.530333	1.07524	0.104659	insig
MW0111406	(2E,4E)-2,4-Dodecadienal	Others	Aldehyde compounds	C12H20O	3	0.6689	21662-16-8	253.72	93.17	110.09	168.61	104.13	168.49	0.0888667	0.930955	0.963334	1.0357	0.0506001	insig
MW0134072	Isorhamnetin 3-galactoside	Flavonoids	Flavonols	C22H22O12	3	0.6688	6743-92-6	14271.8	10960.4	50439.1	39154.9	5328.43	28652.5	0.0867523	0.960825	0.978542	1.03467	0.0491642	insig
MEDL02258	Nordihydrocapsaicin	Alkaloids	Phenolamine	C17H27NO3	3	0.6685	28789-35-7	263.93	136.03	58.59	181.13	320.87	7.49	0.300423	0.884459	0.934744	0.900018	-0.151975	insig
MW0000095	6-Acetylmorphine	Alkaloids	Isoquinoline alkaloids	C19H21NO4	3	0.6677	2784-73-8	3788.88	3624.05	3572.76	2712.13	2228.93	252.61	0.882779	0.123133	0.280348	2.11521	1.0808	insig
MEDP0359	Curcumin	Phenolic acids	Phenolic acids	C21H20O6	3	0.6668	458-37-7	1019.24	2048.11	954.24	1049.56	361.55	603.01	0.986882	0.194258	0.375119	1.9967	0.997616	insig
MW0010577	2,3-Bis(1,3-benzodioxol-5-ylmethyl)butane-1,4-diol	Lignans and Coumarins	Lignans	C20H22O6	3	0.6662	24563-03-9	16931.4	18869.1	13457	35474	23978.8	33505.3	1.30466	0.0380883	0.128512	0.529889	-0.916237	insig
MW0010795	14,15-Epoxy-5,8,11-eicosatrienoic acid	Lipids	Free fatty acids	C20H32O3	3	0.6659	81276-03-1	376814	894083	833231	391754	767615	947584	0.0097119	0.996945	0.999176	0.998659	-0.00193557	insig
MW0009257	Olmesartan	Benzene and substituted derivatives	Benzene and substituted derivatives	C24H26N6O3	3	0.6656	144689-63-4	1.65104e+06	1.684e+06	1.67632e+06	1.13804e+06	1.07942e+06	1.08686e+06	1.45377	9.1138e-05	0.00443341	1.51661	0.600847	insig
MW0056727	Paeoniflorin	Terpenoids	Monoterpenoids	C23H28O11	3	0.6648	23180-57-6	38080.2	33406.3	32283.3	73828.3	60925.6	45675	1.27676	0.0819838	0.214788	0.575129	-0.798043	insig
MEDN0067	Phenylalanylphenylalanine	Amino acids and derivatives	Amino acids and derivatives	C18H20N2O3	3	0.6648	201023-39-4	143433	148784	142182	120919	120668	118242	1.43926	0.00241189	0.0230603	1.20724	0.271708	insig
MW0127884	2'-Hydroxy-4'-Methoxychalcone	Others	Ketone compounds	C16H14O3	3	0.6638	39273-61-5 | 52923-29-2	846.11	77.81	794.64	580.39	1449.44	1613.35	0.785575	0.192996	0.373398	0.47172	-1.084	insig
MEDP0176	Thymidine	Nucleotides and derivatives	Nucleotides and derivatives	C10H14N2O5	3	0.6636	50-89-5	15059	16993.7	15758.7	66931.6	82055	60173.7	1.44628	0.0136342	0.0664414	0.228587	-2.12918	down
MW0114256	Diethylpropion	Benzene and substituted derivatives	Benzene and substituted derivatives	C13H19NO	3	0.6624	134-80-5	60755	42502	61123.5	58796.8	46771.8	49726.7	0.248596	0.697781	0.808232	1.0585	0.0820256	insig
MEDP0215	Quinine	Alkaloids	Quinoline alkaloids	C20H24N2O2	3	0.6621	130-95-0	531.25	258.64	254.94	143350	145261	160743	1.45429	0.00135165	0.0167749	0.00232519	-8.74844	down
MEDP1683	Trileucine	Amino acids and derivatives	Amino acids and derivatives	C18H35N3O4	3	0.6619	10329-75-6	4.49374e+07	4.69006e+07	4.49205e+07	4.85256e+07	4.68001e+07	4.6225e+07	0.939952	0.169486	0.343333	0.966146	-0.0496876	insig
FDATN00011	Lenalidomide	Alcohol and amines	Amines	C13H13N3O3	3	0.6618	191732-72-6 | 443912-14-9	2386.08	1320.49	2806.82	2186.66	1634.51	4615.06	0.380251	0.574809	0.719393	0.772074	-0.37319	insig
MW0127743	4-[(3,3-Dimethyloxiran-2-yl)methoxy]furo[3,2-g]chromen-7-one	Lignans and Coumarins	Coumarins	C16H14O5	3	0.6606	737-52-0	115.62	55.56	629.08	11996.5	7483.68	12132.9	1.37573	0.0201924	0.084985	0.0253142	-5.30391	down
MEDL02688	p-Coumaroyltyramine	Alkaloids	Phenolamine	C17H17NO3	3	0.6604	36417-86-4	610.97	431.01	388.03	689.1	231.85	45.83	0.70281	0.511975	0.66957	1.47915	0.564766	insig
MW0053479	Geranic acid	Organic acids	Organic acids	C10H16O2	3	0.66	459-80-3	16538.1	26757.5	36657	66653.3	74002.7	31456.3	1.06121	0.129918	0.289248	0.464537	-1.10613	down
MEDP0514	Thiamine	Others	Vitamin	C12H17N4OS+	3	0.6598	70-16-6	1011.38	1462.14	1046.07	2806.15	2522.84	238.85	0.0266908	0.490634	0.653314	0.632128	-0.66171	insig
MEDL02041	Acacetin	Flavonoids	Flavones	C16H12O5	3	0.659	480-44-4	976410	1.04101e+06	1.15983e+06	1.15437e+06	1.02635e+06	1.1043e+06	0.400538	0.615211	0.750824	0.967193	-0.0481239	insig
MW0002202	2,4,6-Trihydroxybenzophenone	Others	Others	C13H10O4	3	0.6589	3555-86-0	30597.9	23742.7	37167.1	32535	29680	25031.9	0.177006	0.769557	0.860333	1.04884	0.068791	insig
MEDP0894	3-Methoxytyramine	Phenolic acids	Phenolic acids	C9H13NO2	3	0.6588	554-52-9	104428	108824	120170	53747.2	60729.7	49610	1.42976	0.00102841	0.0144479	2.03199	1.02289	up
MW0049160	Dethiobiotin	Organic acids	Organic acids	C10H18N2O3	3	0.6583	533-48-2	2827.47	4356.97	6869.25	12952.3	13021.9	6570.96	1.14012	0.0828555	0.216229	0.431821	-1.21149	down
MW0007500	Levosimendan	Benzene and substituted derivatives	Benzene and substituted derivatives	C14H12N6O	3	0.6579	141505-33-1	979.21	6326.18	1401.06	163.86	1699.49	1480.49	0.688076	0.409082	0.589079	2.60373	1.38058	insig
MEDN0260	3-Indolebutyric acid	Alkaloids	Plumerane	C12H13NO2	3	0.6579	133-32-4	773.56	2868.87	81.35	101.01	768.68	71.97	0.602854	0.384908	0.570626	3.95448	1.98349	insig
MEDP0051	L-cystathionine	Amino acids and derivatives	Amino acids and derivatives	C7H14N2O4S	3	0.6577	56-88-2	8136.79	858.97	912.93	961.42	111.14	1775.73	0.676865	0.433964	0.607339	3.47882	1.7986	insig
FDATN01492	DL-Methionine	Amino acids and derivatives	Amino acids and derivatives	C5H11NO2S	3	0.6566	59-51-8	1584.34	4211.22	4293.03	17509.5	16495.4	15855.5	1.35897	0.000840302	0.0130483	0.202337	-2.30517	down
MW0052730	Ethyl isovalerate	Others	Lactones	C7H14O2	3	0.6566	108-64-5	234.79	542.79	113.29	1366.4	1881.22	1852.65	1.31489	0.00330971	0.0276289	0.174671	-2.51729	down
MW0146370	Asp-Trp	Amino acids and derivatives	Amino acids and derivatives	C15H17N3O5	3	0.6566	71835-79-5	1540.98	4699.69	222.36	2900.86	258.06	3010.91	0.0672016	0.95473	0.975326	1.04752	0.0669799	insig
MW0049084	(3S,3aS,6R,8aS)-3,8-Dimethyl-5-(propan-2-ylidene)-2,3,4,5,6,8a-hexahydro-1H-3a,6-epoxyazulen-6-ol	Terpenoids	Sesquiterpenoids	C15H22O2	3	0.6566	19431-84-6	338.11	105.4	671.59	463.48	266.69	49.12	0.372684	0.613745	0.749657	1.43092	0.516941	insig
MEDL02607	Isolicoflavonol	Flavonoids	Flavonols	C20H18O6	3	0.6563	94805-83-1	1265.17	499.02	1068.19	400.44	1069.35	760.72	0.417278	0.541543	0.693048	1.26984	0.344641	insig
MEDL00572	1,3-Dicaffeoylquinic acid	Phenolic acids	Phenolic acids	C25H24O12	3	0.6561	19870-46-3	13619	9207.53	18336.2	17006.8	43758	2508.92	0.058243	0.606974	0.744998	0.65055	-0.620267	insig
MEDL02624	Piperlonguminine	Alkaloids	Alkaloids	C16H19NO3	3	0.6552	5950-12-9	79982.4	82025	80841.4	111189	92182.3	95086.8	1.26372	0.086973	0.223076	0.813679	-0.297468	insig
MEDP0781	2-Undecanone	Others	Ketone compounds	C11H22O	3	0.6545	112-12-9	29762.3	32049.8	30901.4	63821.2	62545.1	58956.3	1.45276	0.000470808	0.00992115	0.500282	-0.999187	insig
MW0015653	Farnesyl acetate	Others	Lactones	C17H28O2	3	0.6533	4128-17-0	66050.5	60799.9	124930	190437	405423	185146	1.24334	0.126739	0.284296	0.32238	-1.63317	down
MW0103676	Thymidine-5'-triphosphate	Nucleotides and derivatives	Nucleotides and derivatives	C10H17N2O14P3	3	0.6532	365-08-2	1502.19	323.13	827.59	1195.88	1309.57	691.54	0.466698	0.672984	0.7911	0.829815	-0.269138	insig
MEDP0598	2'-Hydroxy-5'-methylacetophenone	Benzene and substituted derivatives	Benzene and substituted derivatives	C9H10O2	3	0.6531	1450-72-2	386.76	460.93	1544.19	621.62	462.26	544.9	0.302416	0.567502	0.713492	1.46851	0.554353	insig
MW0105691	Arg-Asp	Amino acids and derivatives	Amino acids and derivatives	C10H19N5O5	3	0.6531	15706-88-4	28686.6	25422.4	28613	35554.9	38047	37428	1.39635	0.00301701	0.0263303	0.745043	-0.424605	insig
MEDP0576	N1-acetylspermine	Organic acids	Organic acids	C12H28N4O	3	0.6524	25593-72-0	43626.3	39681.9	42720.4	62780.7	57293.4	56662.9	1.41309	0.00355631	0.0287933	0.713085	-0.487855	insig
MW0056780	Paullinic acid	Lipids	Free fatty acids	C20H38O2	3	0.6516	17735-94-3	76671.3	79619.6	107410	286059	368433	399460	1.4275	0.0111557	0.0589515	0.250202	-1.99884	down
MW0011150	(3b,21b)-12-Oleanene-3,21,28-triol 28-[arabinosyl-(1->3)-arabinosyl-(1->3)-arabinoside]	Terpenoids	Terpene	C45H74O15	3	0.651	243468-98-6	37195.4	31860.4	38432.3	12178.5	6060.14	7406.04	1.40049	0.000591831	0.011336	4.19144	2.06744	up
MEDL01840	Vanillylamine	Alkaloids	Phenolamine	C8H11NO2	3	0.6505	1196-92-5	4498.84	4579.16	2268.33	5395.41	2298.44	6160.56	0.302494	0.588458	0.730201	0.818969	-0.28812	insig
MW0013436	2-Decen-1-ol	Alcohol and amines	Alcohols	C10H20O	3	0.6503	22104-80-9	16616.2	16727.7	20228.3	48020.4	39797.2	33701.1	1.39838	0.0247556	0.0970808	0.440855	-1.18162	down
MEDN0854	Methylglutaric acid	Organic acids	Organic acids	C6H10O4	3	0.6499	626-51-7	1618.81	6663.61	7974.69	47842.6	52805.5	30864.4	1.32172	0.0215958	0.0888514	0.123616	-3.01606	down
MEDL02423	Phosphocreatine	Organic acids	Organic acids	C4H10N3O5P	3	0.6482	67-07-2	1180.37	942.39	285.65	134.71	111.06	235.77	1.21809	0.13571	0.295935	5.00147	2.32235	up
MW0016387	Capsorubin	Others	Ketone compounds	C40H56O4	3	0.6473	470-38-2	60770.8	62398.5	47820.5	46903.3	20462.3	126928	0.179992	0.831738	0.900834	0.880058	-0.184329	insig
MEDN0010	Citrulline	Amino acids and derivatives	Amino acids and derivatives	C6H13N3O3	3	0.6455	372-75-8	72708.8	88797.1	83411	83464	72910.9	79017.1	0.375682	0.607726	0.745694	1.04046	0.057227	insig
MW0145608	Arg-Phe	Amino acids and derivatives	Amino acids and derivatives	C15H23N5O3	3	0.6438	2047-13-4	27566.3	22976.5	26851.5	31556.7	21749.3	15306.6	0.507422	0.604976	0.743938	1.12799	0.173752	insig
MEDN1354	3-Methacrylic acid	Organic acids	Organic acids	C5H8O2	3	0.6436	541-47-9	46892.1	47034	49341.8	21345.1	18094.8	13046.4	1.40334	0.00327138	0.0275003	2.72963	1.4487	up
MW0017148	cis-3-Hexenyl tiglate	Lipids	Free fatty acids	C11H18O2	3	0.6436	67883-79-8	20014.8	17769.6	17123.4	12030.8	10747.4	3131	1.05249	0.062393	0.177036	2.11924	1.08354	up
MEDP0128	Diethanolamine	Alkaloids	Alkaloids	C4H11NO2	3	0.6435	111-42-2	2723.65	12195.2	80.81	2019.99	1110.88	1699.78	0.05668	0.454126	0.624501	3.10511	1.63464	insig
MW0106773	gamma-Glutamylhistidine	Amino acids and derivatives	Amino acids and derivatives	C11H16N4O5	3	0.6428	37460-15-4	12636.5	9445.98	11860.6	9042.62	1315.12	7583.49	0.866756	0.140628	0.303634	1.89191	0.91984	insig
MEDN0571	3-Methoxybenzenepropanoic acid	Organic acids	Organic acids	C10H12O3	3	0.6417	10516-71-9	269514	255372	259810	285163	279060	289655	1.32829	0.0136232	0.0664414	0.91898	-0.121894	insig
MW0121650	5-Methyltetrahydrofolic acid	Organic acids	Organic acids	C20H25N7O6	3	0.6416	134-35-0 | 31690-09-2	30961.9	32023.5	35704.9	22740.8	22216.5	24997.8	1.38678	0.00841384	0.0499686	1.41077	0.496479	insig
MW0103358	2-Phenylaminoadenosine	Nucleotides and derivatives	Nucleotides and derivatives	C16H18N6O4	3	0.6415	53296-10-9	122168	136078	134380	180968	153629	190.29	0.594162	0.764819	0.858937	1.17276	0.229913	insig
MW0127200	1-Propenyl propyl disulfide	Others	Others	C6H12S2	3	0.6414	5905-46-4	12633.9	7526.57	8116.27	9163.14	9117.86	10137.2	0.13612	0.979577	0.988799	0.995022	-0.00719988	insig
MW0161672	(2S)-2-[[(4S)-4-[[(4S)-4-[[4-[[(6S)-2-amino-4-oxo-5,6,7,8-tetrahydro-1H-pteridin-6-yl]methylamino]benzoyl]amino]-4-carboxybutanoyl]amino]-4-carboxybutanoyl]amino]pentanedioic acid	Others	Others	C29H37N9O12	3	0.6407	88903-89-3	727924	709534	690795	785389	767033	768088	1.35859	0.0122794	0.0621594	0.917149	-0.124773	insig
MW0113920	Alpha-Trisaccharide	Others	Saccharides	C20H37NO14	3	0.6387	49777-13-1	10701.9	12389.5	8899.74	16199.5	13534.4	18487.1	1.22858	0.0422127	0.136792	0.663427	-0.591989	insig
MEDL02208	Nornicotine	Alkaloids	Pyridine alkaloids	C9H12N2	3	0.6371	494-97-3	5643.57	2803.94	8577.29	5323.59	12349.9	2222.12	0.0305725	0.797583	0.879861	0.855706	-0.224813	insig
MEDP1799	Quinaldic acid	Organic acids	Organic acids	C10H7NO2	3	0.637	93-10-7	889532	927321	932202	812130	840743	861388	1.30154	0.0164417	0.0751622	1.09338	0.128801	insig
MW0140528	Isobutyraldehyde oxime	Others	Aldehyde compounds	C4H9NO	3	0.6352	151-00-8 | 118063-49-3	109305	100555	128227	80180.6	73827.2	66254.9	1.34355	0.0242738	0.0964255	1.53493	0.61817	insig
MEDP0528	Mesalazine	Organic acids	Organic acids	C7H7NO3	3	0.6347	89-57-6	430617	481464	513414	500482	490207	496778	0.583469	0.482389	0.647467	0.958338	-0.061394	insig
MEDL01817	Quercetagetin	Flavonoids	Flavonols	C15H10O8	3	0.6328	90-18-6	67.2	100.28	28.94	12090.4	9403.35	8573.8	1.44319	0.0111483	0.0589515	0.00653262	-7.25812	down
MEDL01779	Ganoderic acid Mj	Terpenoids	Triterpene	C33H52O6	3	0.6318	110024-15-2	18407	16374.7	17933.7	12237.2	18879.6	12595.7	0.847984	0.296789	0.485754	1.20596	0.270176	insig
MW0007582	Menadione	Others	Vitamin	C11H8O2	3	0.6317	58-27-5	82650.7	82123.8	83239	85328.4	81807.1	77355.6	0.371375	0.662585	0.785055	1.01441	0.0206361	insig
MEDN1303	D-Mannose 1-phosphate	Others	Saccharides	C6H13O9P	3	0.6312	27251-84-9	33969.5	33180.7	34416.5	14966.8	14334.3	11019.5	1.4288	0.00189695	0.0202341	2.51897	1.33284	up
MW0103639	Orotidylic acid	Nucleotides and derivatives	Nucleotides and derivatives	C10H13N2O11P	3	0.6302	2149-82-8	44278.3	32752.6	37232.9	9627.12	918.09	1704.79	1.29483	0.00166948	0.0188026	9.32766	3.22152	up
MW0127088	Trimethylsilyl nonanoate	Organic acids	Organic acids	C12H26O2Si	3	0.6294	82326-11-2	7276.04	4842.9	3899	5592.47	9256.79	4304.3	0.391182	0.595113	0.736042	0.83629	-0.257924	insig
MEDP0457	5-Aminolevulinic acid	Alkaloids	Alkaloids	C5H9NO3	3	0.6274	106-60-5	65.85	1520.55	82.21	43915.1	46711.1	44969.3	1.36647	1.02258e-05	0.00171793	0.0123058	-6.34452	down
MEDP1754	Dimethyl fumarate	Phenolic acids	Phenolic acids	C6H8O4	3	0.627	624-49-7	8043.56	3129.03	6160.69	10629.4	16372.8	6628.91	0.959055	0.186209	0.36535	0.515394	-0.956253	insig
MEDL00436	Dehydroabietic acid	Terpenoids	Ditepenoids	C20H28O2	3	0.6249	1740-19-8	133143	88806.5	124694	174771	165378	167736	1.22997	0.053094	0.159029	0.682524	-0.551048	insig
MW0000524	1-Phenylethanethiol	Benzene and substituted derivatives	Benzene and substituted derivatives	C8H10S	3	0.6241	6263-65-6	5525.96	6243.09	8757.21	11316.3	23478	8745.73	1.05308	0.230018	0.414588	0.471434	-1.08487	down
MW0000003	Cinchonan-3,9-diol, 6'-methoxy-, (8alpha,9R)-	Alkaloids	Alkaloids	C20H24N2O3	3	0.6236	78549-61-8	717.63	842.43	1419.9	24686.3	21191.8	21565.4	1.44607	0.00194364	0.020623	0.0441845	-4.50032	down
MW0017137	Nervonic acid	Lipids	Free fatty acids	C24H46O2	3	0.6226	506-37-6	852.31	301.08	3486.66	5160.04	16032.1	1549.38	0.941963	0.298332	0.486994	0.204034	-2.29312	insig
MEDP1339	LPC(18:1/0:0)	Lipids	LPC	C26H53NO7P	3	0.6223	3542-29-8	845.8	1542.18	979.53	1439.49	1137.64	288.98	0.433253	0.705031	0.812892	1.17494	0.232588	insig
MW0105428	Acetylphosphate	Organic acids	Organic acids	C2H5O5P	3	0.6219	590-54-5	21126.8	25135.6	29620.3	33219	26714.1	26550.2	0.703856	0.344304	0.53067	0.877428	-0.188648	insig
MW0054356	3,7-Dimethyl-1,6-octadien-3-ol	Alcohol and amines	Alcohols	C10H18O	3	0.6219	78-70-6	17316.5	16981.5	15830.9	31270.3	31383.8	34084.2	1.44867	0.000738875	0.0126614	0.51819	-0.948448	insig
MW0109260	Phosphonoacetate	Organic acids	Organic acids	C2H5O5P	3	0.6219	4408-78-0	98968.4	45886.7	73819.5	429.47	2763.24	105921	0.914898	0.413342	0.592006	2.0041	1.00295	insig
MEDP1157	3-Methylindole	Alkaloids	Plumerane	C9H9N	3	0.6212	83-34-1	145623	146976	145521	191574	180551	178726	1.43285	0.0104212	0.057168	0.79535	-0.330338	insig
MW0108476	N-Phenylacetylphenylalanine	Amino acids and derivatives	Amino acids and derivatives	C17H17NO3	3	0.6212	738-75-0	88211	83570.1	94952.2	95526.5	94668.3	82533.5	0.256115	0.728239	0.830625	0.978019	-0.032066	insig
MEDP1810	2,2,6,6-Tetramethyl-4-piperidinone	Heterocyclic compounds	Heterocyclic compounds	C9H17NO	3	0.6206	826-36-8	28786.4	20487.5	13851.4	13292.2	11220.5	13575.3	1.06044	0.190111	0.369946	1.65735	0.728882	insig
MEDP0650	4,4'-Methylenedianiline	Alkaloids	Alkaloids	C13H14N2	3	0.619	101-77-9	411499	402223	430029	475699	466394	437640	1.24204	0.0372336	0.126475	0.901444	-0.14969	insig
MW0148368	D-Glucosylsphingosine	SL	SPH	C24H47NO7	3	0.6182	52050-17-6	3102.06	716.93	2633.71	2357.9	2576.12	4559.56	0.663271	0.373027	0.559125	0.679691	-0.557049	insig
MW0054527	2-Palmitoyl-sn-glycero-3-phosphocholine	Lipids	LPC	C24H50NO7P	3	0.6177	66757-27-5	54918.2	112950	100251	5522.16	864.94	78549	0.994235	0.125885	0.284296	3.15671	1.65842	insig
MW0115297	S-Methyl-5-thio-D-ribulose 1-phosphate	Organic acids	Organic acids	C6H13O7PS	3	0.6177	86316-83-8	25082.4	371930	340391	154207	37253.4	128954	0.347048	0.336405	0.523205	2.3014	1.20251	insig
MEDP1610	Proline betaine	Alkaloids	Pyrrole alkaloids	C7H13NO2	3	0.6174	471-87-4	60240.5	68522	65280.7	78819.5	75999.1	78859.1	1.34399	0.0203783	0.0855891	0.830388	-0.268142	insig
MW0015647	all-trans-5,6-Epoxyretinoic acid	Organic acids	Organic acids	C20H28O3	3	0.6156	13100-69-1	23072.6	19436	16515.3	721371	1.3039e+06	1.22583e+06	1.45084	0.0281877	0.104557	0.0181551	-5.78348	down
MW0107282	Histidylalanine	Amino acids and derivatives	Amino acids and derivatives	C9H14N4O3	3	0.6142	16874-75-2	20499.4	22782.8	23932.1	36096.6	34993.2	36904.9	1.42993	0.00110521	0.0150547	0.622386	-0.684119	insig
MW0123362	Citbismine B	Heterocyclic compounds	Heterocyclic compounds	C36H34N2O11	3	0.6139	169055-77-0	125265	121967	126273	124676	107262	120858	0.775561	0.320434	0.508471	1.0587	0.082295	insig
MEDL01994	Diisobutyl phthalate	Benzene and substituted derivatives	Benzene and substituted derivatives	C16H22O4	3	0.6126	84-69-5	395.55	593.59	2491.58	7310.53	8605.65	2230.02	1.15694	0.116662	0.270178	0.191815	-2.38221	down
MW0107215	Guanidinosuccinic acid	Organic acids	Organic acids	C5H9N3O4	3	0.6125	6133-30-8	48367.4	36856.3	57240.7	78079.2	105057	56768.7	1.10302	0.131957	0.291854	0.593838	-0.751859	insig
MW0007866	Mycophenolic acid	Organic acids	Organic acids	C17H20O6	3	0.6098	24280-93-1	9833.31	8918.68	7983.02	7251.24	5360.78	5780.3	1.26495	0.0240072	0.0960288	1.4536	0.539627	insig
MEDL02599	Methuyl tanshinonate	Quinones	PhenAnthraquinones	C20H18O5	3	0.6093	18887-19-9	88636.9	203528	238872	119387	113749	112381	0.714698	0.305787	0.494389	1.53694	0.620058	insig
MEDL01768	6-O-Acetylarbutin	Phenolic acids	Phenolic acids	C14H18O8	3	0.6086	10338-88-2	1048.73	2635.46	4807.47	3238.34	3079.4	2804.41	0.392081	0.865318	0.923494	0.930884	-0.103327	insig
MEDL02603	7,3',4'-Trihydroxyflavone	Flavonoids	Flavones	C15H10O5	3	0.6083	2150-11-0 | 104666-14-0	2103.94	1019.92	1133.76	6128.72	5857.7	3168.29	1.31313	0.048232	0.148678	0.280944	-1.83165	down
MW0061634	Physalin K	Steroids	Steroid	C28H30O12	3	0.6081	76045-35-7	50935.4	61013	58654.5	70819.7	32716	61315.4	0.245971	0.884668	0.934744	1.03489	0.0494789	insig
MW0129674	1,3-Diphenylpropan-1-ol	Alcohol and amines	Alcohols	C15H16O	3	0.6073	14097-24-6	9765.22	5054.73	20659.5	38100	25227.8	36635.3	1.18181	0.0257536	0.0995894	0.354926	-1.49441	down
MW0015017	6-Geranylgeranyl 8'-methyl 6,8'-diapocarotene-6,8'-dioate	Others	Lactones	C43H60O4	3	0.6062	247030-33-7	24011.4	26105.8	24252.6	15554.3	20583	23129.7	1.02818	0.143156	0.306697	1.25482	0.327486	insig
MW0012238	12-Methyltridecanoic acid	Lipids	Free fatty acids	C14H28O2	3	0.603	2724-57-4	7006.93	4211.12	399.02	8901.42	4276.43	11247.8	0.789923	0.202802	0.386071	0.475609	-1.07215	insig
MW0103902	(3R)-3-hydroxy-3-methyl-5-(phosphonooxy)pentanoic acid	Organic acids	Organic acids	C6H13O7P	3	0.6028	73566-35-5	6081.33	5687.18	5559.92	13616.6	12946.3	10413.8	1.42176	0.019313	0.0831056	0.468632	-1.09347	down
MW0102922	Tributyrin	GL	TG	C15H26O6	3	0.6028	60-01-5	136938	126185	120698	88867	121905	113545	0.949369	0.173163	0.348573	1.18347	0.243025	insig
MW0144360	Phosphoadenosine phosphosulfate	Nucleotides and derivatives	Nucleotides and derivatives	C10H15N5O13P2S	3	0.6023	482-67-7	64585.8	117330	112669	262093	294945	221920	1.34567	0.00458466	0.0341168	0.378178	-1.40286	down
MW0105065	3-Hydroxydecanedioic acid	Organic acids	Organic acids	C10H18O5	3	0.6017	73141-46-5 | 68812-93-1	8.14794e+06	7.76912e+06	8.52375e+06	8.84266e+06	8.83264e+06	9.26674e+06	1.23171	0.0405101	0.133445	0.907162	-0.140568	insig
MEDL00348	Asp-Tyr	Amino acids and derivatives	Amino acids and derivatives	C13H16N2O6	3	0.6007	22840-03-5	84.03	372.47	265.16	49.02	374.23	495.33	0.0260022	0.702146	0.81119	0.785626	-0.348086	insig
MW0129713	Tetrahydrobisdemethoxydiferuloylmethane	Others	Ketone compounds	C19H20O4	3	0.6	113482-94-3	8279.3	12232.3	11069.6	12903.6	12852.4	18616.9	1.02898	0.144745	0.309268	0.711723	-0.490612	insig
MW0110101	Trp-Asp	Amino acids and derivatives	Amino acids and derivatives	C15H17N3O5	3	0.5991	71835-78-4	33373.9	29769.6	35036.9	33644.8	29430.4	29948	0.562122	0.448745	0.619849	1.05544	0.0778435	insig
MEDL01956	Cajanol	Flavonoids	Isoflavones	C17H16O6	3	0.5985	61020-70-0	95152.7	112882	101885	90825.4	72961.4	95644.4	1.00033	0.128215	0.286265	1.19461	0.256544	insig
MEDL01745	Cichoralexin	Terpenoids	Sesquiterpenoids	C15H20O3	3	0.5971	132296-37-8	37.5	54.97	848.47	8863.43	7024.51	6642.55	1.31631	0.00406986	0.0316179	0.041763	-4.58163	down
MW0013096	2,3-Dihydrowithanolide E	Others	Lactones	C28H40O7	3	0.596	38253-76-8	1792.52	1860.7	2204.77	1265.06	2318.91	2415.97	0.0406141	0.912596	0.951535	0.976341	-0.0345423	insig
MW0153443	(2S,3R,4R,5R)-6-[(2S,3R,4S,5R,6R)-3,4,5-trihydroxy-6-(hydroxymethyl)tetrahydropyran-2-yl]oxyhexane-1,2,3,4,5-pentol	Others	Saccharides	C12H24O11	3	0.5956	497-83-6	2089.98	441.44	3359.79	4190.4	3750.35	1679.13	0.680409	0.339522	0.526521	0.6124	-0.707455	insig
MEDP0672	Cyclohexylamine	Alkaloids	Alkaloids	C6H13N	3	0.5949	108-91-8	31570.6	29062	27595.6	41930.8	37019.3	36328.4	1.33174	0.0176088	0.0786255	0.765349	-0.385811	insig
MW0106105	Carbamic acid	Organic acids	Organic acids	CH3NO2	3	0.5946	463-77-4	37040.2	19595.4	47000.6	23884.4	31932	35158.1	0.202517	0.663825	0.786062	1.13918	0.187993	insig
MEDL01777	Ganoderic acid Mf	Terpenoids	Triterpene	C32H48O5	3	0.5935	108026-94-4	35055.9	58652.7	41484.6	71779.9	142636	100747	1.25087	0.087526	0.223924	0.428963	-1.22108	down
MW0109985	alpha-Carboxy-alpha-3-thienylmethylpenicillin	Heterocyclic compounds	Heterocyclic compounds	C15H16N2O6S2	3	0.5927	3973-04-4	4160.99	2954.72	5049.78	34392	28351.6	20720	1.42391	0.024392	0.0964815	0.145758	-2.77835	down
MW0052578	Eplerenone	Others	Ketone compounds	C24H30O6	3	0.5925	107724-20-9	236042	239040	240469	152466	261504	231900	0.530515	0.549643	0.698413	1.10789	0.147812	insig
MW0127201	1-Propenyl propyl sulfide	Others	Others	C6H12S	3	0.5924	33922-70-2	2214.64	1508.55	1801.91	3520.35	3414.62	1771.77	0.940159	0.19372	0.374371	0.634577	-0.656132	insig
MEDL01785	3,3'-Bis(4''-hydroxyanigorufone)	Others	Ketone compounds	C38H22O6	3	0.592	190372-82-8	1048	1797.15	1410.53	1028.01	1229.59	1149.48	0.761045	0.320054	0.508471	1.24907	0.320854	insig
MEDP1475	N-Methylhydantoin	Heterocyclic compounds	Heterocyclic compounds	C4H6N2O2	3	0.5905	616-04-6	22154.5	21490.9	12445.9	10384.9	11525	11221.7	1.15734	0.132851	0.292463	1.69299	0.759573	insig
MW0111055	Dihomo-gamma-linolenoylethanolamide	Alcohol and amines	Amines	C22H39NO2	3	0.5903	150314-34-4	443974	433296	442933	1.08828e+06	1.07499e+06	1.03695e+06	1.45795	0.000351705	0.0086468	0.412535	-1.27741	down
MW0112868	Prenol	Alcohol and amines	Alcohols	C5H10O	3	0.5896	556-82-1	11326	6691.2	9024.78	7181.86	5804.68	11134.7	0.372164	0.665351	0.786945	1.12109	0.1649	insig
MW0006487	Carbanilide	Benzene and substituted derivatives	Benzene and substituted derivatives	C13H12N2O	3	0.5886	102-07-8	24781.1	26959.1	23004.8	20095.1	20078.7	18322.3	1.32955	0.0246183	0.0968401	1.27778	0.353636	insig
MW0053451	Ganoderiol G	Others	Ketone compounds	C31H52O5	3	0.588	114567-48-5	41778.2	34066.2	30088	84705.2	19652.6	83395.5	0.537898	0.331148	0.517515	0.56421	-0.825695	insig
MW0056732	9-Hexadecenoic acid	Lipids	Free fatty acids	C16H30O2	3	0.5858	10030-73-6	28.78	5.76	5.76	1138.84	575.38	764.04	1.41179	0.0388449	0.129856	0.0162614	-5.9424	down
MW0155568	Picrocrocin	Others	Others	C16H26O7	3	0.5858	138-55-6	9096.24	8615.76	10466	563.1	492.84	2353.61	1.34342	0.000581076	0.011336	8.26443	3.04692	up
MW0103194	Zeinoxanthin	Terpenoids	Tetraterpenes	C40H56O	3	0.5855	24480-38-4	58096.3	61847	59560.2	30927.8	54633	56963.2	0.814476	0.275545	0.465226	1.25946	0.332807	insig
MW0133968	5,6,7-Trimethoxyflavone	Flavonoids	Flavones	C18H16O5	3	0.5853	973-67-1	1749.25	1949.97	1624.5	5873.06	3032.19	3097.45	1.26019	0.139141	0.30146	0.443544	-1.17285	down
MW0005981	Alitretinoin	Organic acids	Organic acids	C20H28O2	3	0.5853	5300-03-8	397.08	1025.88	310.57	294.45	1575.32	920.46	0.457497	0.470504	0.637242	0.621286	-0.686671	insig
MW0153756	Met-Gln	Amino acids and derivatives	Amino acids and derivatives	C10H19N3O4S	3	0.5845	36261-62-8	2225.75	256.35	120.93	854.25	524.95	221.43	0.092024	0.676685	0.793575	1.62625	0.701552	insig
MW0007146	Fesoterodine	Benzene and substituted derivatives	Benzene and substituted derivatives	C26H37NO3	3	0.583	286930-03-8	417.45	341.67	52.32	1003.21	697.07	804.19	1.0682	0.0183223	0.0805621	0.323997	-1.62595	down
MW0017063	Cholecalciferol	Others	Vitamin	C27H44O	3	0.5825	67-97-0	46643.1	15972.4	497849	1.2008e+06	232652	636458	0.985625	0.2115	0.397043	0.270768	-1.88487	insig
MW0013974	3beta-Acetoxy-19alpha-hydroxy-12-ursene	Others	Hydrocarbon derivatives	C32H52O3	3	0.5809	273223-68-0	12220.1	657.23	10798.1	8325.44	286.73	15225.3	0.135076	0.99284	0.996547	0.993204	-0.00983868	insig
MW0134251	Isorhapontigenin	Others	Stilbene	C15H14O4	3	0.5797	32507-66-7 | 20767-15-1	2040.68	6314.9	3849.42	1261.77	1718.22	2856.21	0.949618	0.22245	0.407034	2.09126	1.06437	insig
MW0104093	[3-[1-Formyl-2-(2-furanyl)ethenyl]]-2-(2-furanyl)-5-(2-furanylmethylene)-4,5-dihydro-a-methyl-4-oxo-1H-pyrrole-1-acetic acid, 9CI	Organic acids	Organic acids	C23H17NO7	3	0.5794	198414-08-3	133.1	110.26	194.14	116.55	80.13	295.34	0.0187753	0.817312	0.892579	0.889191	-0.169434	insig
MW0016178	Betulin	Terpenoids	Triterpene	C30H50O2	3	0.5791	473-98-3	810.28	101.49	91.62	1030.86	420.99	578.4	0.891301	0.321507	0.508791	0.49422	-1.01677	insig
MEDP1764	Harmaline	Alkaloids	Plumerane	C13H14N2O	3	0.577	304-21-2	18694.9	16722.7	37944.8	7076.51	37101.2	24352.2	0.263702	0.891294	0.939566	1.07052	0.098307	insig
MW0161522	6-Deoxocastasterone	Alcohol and amines	Alcohols	C28H50O4	3	0.5765	87833-54-3	141234	153099	176772	138123	128430	163099	0.632413	0.400142	0.582025	1.09648	0.132878	insig
MW0138703	Kavain	Others	Lactones	C14H14O3	3	0.5759	500-64-1	735281	734622	727246	351608	328318	349707	1.45647	9.27684e-05	0.00445288	2.13391	1.0935	up
MEDP0707	2-Pentadecanone	Others	Ketone compounds	C15H30O	3	0.5749	2345-28-0	40345.8	38065.1	48238	28723.6	43870	30979.8	0.850866	0.254624	0.441604	1.22279	0.290182	insig
MW0106862	Gln-Met	Amino acids and derivatives	Amino acids and derivatives	C10H19N3O4S	3	0.5746	114659-59-5	321593	363628	468894	473491	436890	315788	0.252328	0.729542	0.831576	0.941236	-0.0873721	insig
MEDL01962	4-Hydroxybenzylamine	Alkaloids	Phenolamine	C7H9NO	3	0.5746	696-60-6	18396.8	57124.9	61891.8	68633.5	67567.6	47418.4	0.647636	0.392329	0.576801	0.74836	-0.418196	insig
MW0122710	9-Methyluric acid	Organic acids	Organic acids	C6H6N4O3	3	0.5745	55441-71-9	2712.17	3306.04	3673.8	2163.83	3792.39	2240.81	0.631697	0.466454	0.634988	1.18238	0.241695	insig
MEDL02264	Betulafolienetriol	Alcohol and amines	Alcohols	C30H52O3	3	0.5736	6892-79-1 | 30636-90-9	12044	5991.75	6200.5	26350.4	29531.7	23762.8	1.36377	0.00228604	0.0225362	0.304303	-1.71642	down
MW0111016	Docosahexaenoyl Ethanolamide	Alcohol and amines	Amines	C24H37NO2	3	0.5732	162758-94-3	130926	119952	134352	195038	177342	184027	1.41879	0.00121173	0.0160647	0.692353	-0.53042	insig
MEDN0841	Ureidopropionic acid	Organic acids	Organic acids	C4H8N2O3	3	0.5731	462-88-4	6754.53	8345.37	4018.58	2419.18	4955.81	3888.94	0.958162	0.165045	0.337284	1.69732	0.763258	insig
MW0013827	3,4-Dimethyl-5-pentyl-2-furanpentadecanoic acid	Organic acids	Organic acids	C26H46O3	3	0.5725	116627-42-0	109856	116698	180411	125431	133844	140935	0.0348805	0.930079	0.963196	1.01688	0.0241456	insig
MW0105167	FAPy-adenine	Heterocyclic compounds	Heterocyclic compounds	C5H7N5O	3	0.5722	5122-36-1	4255.2	3821.32	2741.41	44825.5	79166.4	46373.8	1.43936	0.0413897	0.135567	0.0634983	-3.97714	down
MEDP1807	Thymoquinone	Quinones	Quinones	C10H12O2	3	0.5716	490-91-5	666.19	577.38	121.35	750.9	577.68	650.83	0.697676	0.349126	0.53585	0.689559	-0.536254	insig
MEDN0036	L-Alanyl-L-alanine	Amino acids and derivatives	Amino acids and derivatives	C6H12N2O3	3	0.5713	1948-31-8	322439	352139	373881	260485	217727	190944	1.33636	0.00915005	0.0522688	1.56684	0.647855	insig
MW0013548	2''-Methoxy-(S)-oleuropein	Phenolic acids	Phenolic acids	C26H34O14	3	0.5685	256498-10-9	12607.5	13035.2	13055.1	8710.76	6158.98	8418.39	1.34193	0.0209418	0.0869593	1.6617	0.732659	insig
MEDP1476	5-Methoxytryptamine	Alkaloids	Plumerane	C11H14N2O	3	0.5676	608-07-1	26655	54456.8	45928.2	55881.8	54163	28815.7	0.212089	0.759319	0.855189	0.914875	-0.128353	insig
MW0116275	1-(2,3-Dihydro-1H-pyrrolizin-5-yl)-1-butanone	Others	Ketone compounds	C11H15NO	3	0.5674	97072-99-6	713.91	3936.05	3876.28	5462.68	6296.71	4929.29	0.912423	0.111588	0.261584	0.5109	-0.968888	insig
MW0103558	Faicar	Nucleotides and derivatives	Nucleotides and derivatives	C10H15N4O9P	3	0.5662	13018-54-7	105074	29744.5	28401	76403	70690.3	16179.4	0.00575789	0.99958	0.99958	0.999672	-0.00047387	insig
MEDL02612	Licoricone	Flavonoids	Isoflavones	C22H22O6	3	0.5643	51847-92-8	238.13	129.47	192.36	707.18	134.19	382.87	0.735691	0.312539	0.501577	0.457394	-1.12849	insig
MEDL02219	5,7-Dihydroxy-3',4',5'-trimethoxyflavone	Flavonoids	Flavones	C18H16O7	3	0.5641	18103-42-9	9213.99	10295.5	9677.58	12724.4	7021.81	7407.7	0.397852	0.749601	0.848271	1.07488	0.104173	insig
MEDL02184	Bergapten	Lignans and Coumarins	Coumarins	C12H8O4	3	0.5634	484-20-8	422.53	389.76	54	923.29	258.86	416.4	0.676715	0.365799	0.55302	0.541922	-0.883842	insig
MEDN1569	Piperlongumine	Alkaloids	Pyridine alkaloids	C17H19NO5	3	0.56	20069-09-4	49018.2	48418.7	47504.2	96188.1	92004.1	91360.9	1.45661	0.000506029	0.0105171	0.518474	-0.947657	insig
MW0116619	1,3,5-Trithiane	Heterocyclic compounds	Heterocyclic compounds	C3H6S3	3	0.5595	291-21-4	16242.9	9252.5	17538.9	5115.1	23329.6	22303.1	0.00477375	0.719001	0.823583	0.848003	-0.237859	insig
MW0005721	5-Nonadecyl-1,3-benzenediol	Phenolic acids	Phenolic acids	C25H44O2	3	0.5587	35176-46-6	59336.8	101417	102055	62056.5	108744	113749	0.202892	0.755499	0.852639	0.923594	-0.11467	insig
MW0112809	3'-Fucosyllactose	Others	Saccharides	C18H32O15	3	0.5582	41312-47-4	329643	256274	139079	674329	684240	746626	1.32606	0.0070289	0.0446823	0.344384	-1.53791	down
MEDN0530	Pimelic acid	Organic acids	Organic acids	C7H12O4	3	0.557	111-16-0	93.24	71.55	82.21	10997.7	7731.25	10965.8	1.45644	0.0119646	0.0616106	0.00831798	-6.90955	down
MEDL02627	Melilotocarpan D	Phenolic acids	Phenolic acids	C17H16O6	3	0.5552	83013-81-4	3328.51	2953.07	6067.21	10103.4	8326.9	12105.9	1.29262	0.01483	0.0695284	0.404399	-1.30615	down
MW0106039	Betonicine	Heterocyclic compounds	Heterocyclic compounds	C7H13NO3	3	0.5538	515-25-3	6606.67	1732.26	3472.8	12853.1	37812.2	2833.19	0.836213	0.312578	0.501577	0.220786	-2.17928	insig
MW0105968	Aspartyl-L-proline	Amino acids and derivatives	Amino acids and derivatives	C9H14N2O5	3	0.5528	42155-95-3	38770.9	40467.2	12353.4	39477.1	15738.7	17572.4	0.282848	0.626332	0.75951	1.25833	0.33151	insig
MEDP0716	cis-Citral	Others	Aldehyde compounds	C10H16O	3	0.5524	106-26-3	29682.8	28273.3	25768.3	34985.3	30440.9	36113.7	1.19658	0.0545038	0.161741	0.824546	-0.278328	insig
MW0104839	2-Phosphoglycolic Acid	Organic acids	Organic acids	C2H5O6P	3	0.5522	13147-57-4	2665.97	2600.15	2119.53	24920.9	26911.2	27794	1.4557	0.000837926	0.0130483	0.0927541	-3.43045	down
MW0130726	2-Benzylideneheptanal	Others	Aldehyde compounds	C14H18O	3	0.5486	122-40-7	50486.2	73686.9	58297.2	134123	139733	145081	1.40958	0.00240254	0.0230603	0.435556	-1.19907	down
MW0105659	Arginylhistidine	Amino acids and derivatives	Amino acids and derivatives	C12H21N7O3	3	0.5458	155114-05-9	42708.6	56349.2	52147.9	51688.1	37397.4	45983.7	0.607617	0.405478	0.586612	1.11947	0.162813	insig
MW0013826	3,4-Dimethyl-5-pentyl-2-furanoctanoic acid	Organic acids	Organic acids	C19H32O3	3	0.5434	142937-54-0	5901.81	356.47	8795.73	14841.4	14364.9	13454.4	0.933936	0.0618122	0.176132	0.352877	-1.50276	insig
MW0105314	5-Hydroxylysine	Amino acids and derivatives	Amino acids and derivatives	C6H14N2O3	3	0.5408	1190-94-9	488249	445781	315369	416414	363844	381761	0.29398	0.637937	0.768268	1.0752	0.1046	insig
MW0106839	Gln-Asp	Amino acids and derivatives	Amino acids and derivatives	C9H15N3O6	3	0.5405	286966-95-8	26642.2	50806.4	33529.1	20010.7	38216.8	37856.5	0.370144	0.625057	0.75842	1.15501	0.2079	insig
MEDL02748	Auraptene	Lignans and Coumarins	Coumarins	C19H22O3	3	0.5398	495-02-3	469263	495133	260706	522730	342403	323113	0.0445065	0.906148	0.948738	1.03102	0.0440682	insig
MW0169164	Flavone	Flavonoids	Flavones	C15H10O2	3	0.5384	525-82-6	14137.8	25935.7	25451.9	44533	43758.2	32955.2	1.20091	0.025864	0.0995894	0.540432	-0.887816	insig
MW0123692	2,4-Dihydroxy-7-methoxy-1,4-benzoxazin-3-one	Alkaloids	Alkaloids	C9H9NO5	3	0.5366	15893-52-4	24984.8	26917.4	25697.7	17323.3	9598.57	15609.8	1.2623	0.0319941	0.114463	1.82452	0.867517	insig
MEDP0156	5-Methyluridine	Nucleotides and derivatives	Nucleotides and derivatives	C10H14N2O6	3	0.5324	1463-10-1	576793	759058	634031	588648	572538	564059	0.893247	0.26782	0.45737	1.1418	0.191307	insig
MEDN0553	2-Methylbenzoic acid	Phenolic acids	Phenolic acids	C8H8O2	3	0.5324	118-90-1	5356.59	3543.53	4493.12	6593.03	11003.7	8791.36	1.26866	0.0605572	0.173537	0.507549	-0.97838	insig
MW0013003	1-Stearoyl-2-linoleoyl-sn-glycero-3-phosphoethanolamine	GP	PE	C41H78NO8P	3	0.5322	7266-53-7	305.26	545.55	1723.93	132.37	239.33	3930.56	0.173349	0.698402	0.808254	0.598462	-0.740668	insig
MW0114026	Butanal	Others	Aldehyde compounds	C4H8O	3	0.5293	123-72-8	191405	188149	173325	262234	284492	263252	1.42722	0.000979889	0.014161	0.682585	-0.550919	insig
MW0109182	Phenylalanyllysine	Amino acids and derivatives	Amino acids and derivatives	C15H23N3O3	3	0.5278	6456-72-0	87182	83286.6	92729.4	110235	98921.6	98597.8	1.24193	0.0393417	0.130771	0.855222	-0.225628	insig
MW0134506	5-Hydroxyflavone	Flavonoids	Flavones	C15H10O3	3	0.5269	491-78-1 | 66585-06-6	892.03	1210.45	933.05	867.59	2098.88	532.08	0.0226776	0.77902	0.866964	0.867654	-0.204809	insig
MEDL02647	moracin I	Phenolic acids	Phenolic acids	C20H20O4	3	0.523	73338-88-2	8050.55	8322.88	3286.19	3194.02	1932.16	1149.08	1.17271	0.0987611	0.241193	3.13288	1.64749	up
MEDP1005	β-Alanine	Amino acids and derivatives	Amino acids and derivatives	C3H7NO2	3	0.5227	107-95-9	45617.2	54103.5	74168.4	81283.6	46074.8	54406.7	0.117596	0.856611	0.917846	0.95667	-0.0639063	insig
MEDP0298	Aminocaproic acid	Organic acids	Organic acids	C6H13NO2	3	0.5207	60-32-2	13684	10969.4	13293.1	49076.9	43510.8	41342.4	1.4456	0.00218586	0.0220334	0.283331	-1.81944	down
MW0112851	3-Ketolactose	Others	Saccharides	C12H20O11	3	0.5164	15990-62-2	168906	161444	158128	237743	203166	204940	1.35718	0.0348614	0.121069	0.756334	-0.402904	insig
MW0010883	(1R,3R,4R,5S,6S,8x)-1-Acetoxy-8-angeloyloxy-3,4-epoxy-5-hydroxy-7(14),10-bisaboladien-2-one	Others	Ketone compounds	C22H30O7	3	0.5151	348113-03-1	7836.15	10813.2	13444.2	17479.7	16387.8	12817	1.06387	0.0873976	0.223738	0.687457	-0.540658	insig
MW0003454	3-(3,4-dimethoxyphenyl)-N-[2-(3,4-dimethoxyphenyl)ethyl]propanamide	Benzene and substituted derivatives	Benzene and substituted derivatives	C21H27NO5	3	0.5119	20944-13-2	223638	225705	217716	204686	216037	206263	1.22607	0.0424997	0.137087	1.06391	0.0893796	insig
MW0055437	Octadecanedioic acid	Lipids	Free fatty acids	C18H34O4	3	0.5042	871-70-5	9997.64	917.55	5267.23	5931.81	2030.4	1782.31	0.240554	0.519368	0.675078	1.66067	0.731764	insig
MW0012860	3-Palmitoyl-sn-glycerol	GL	MG	C19H38O4	2	0.9548	-	144757	238760	272108	356359	123744	261624	0.134057	0.734767	0.835942	0.883917	-0.178018	insig
MW0138670	kaempferol 7-O-glucoside	Flavonoids	Flavonols	C21H20O11	2	0.9389	-	4744.89	103747	2608.62	9043.46	137350	5557.07	0.265373	0.816471	0.892305	0.731163	-0.451734	insig
MW0015194	cis-7-Hexadecenoic Acid methyl ester	Organic acids	Organic acids	C17H32O2	2	0.9259	-	173.38	173.15	67.32	220.78	417.52	173.69	0.939785	0.211154	0.397043	0.509674	-0.972354	insig
MW0103681	Uridine-5'-diphosphogalactose disodium salt	Nucleotides and derivatives	Nucleotides and derivatives	C15H24N2O17P2	2	0.9231	-	5182.01	2928.12	15045.2	17791.7	23546.1	26265	1.15953	0.0363225	0.124358	0.34252	-1.54574	down
MW0110307	L-Tyrosyl-L-Threonine	Amino acids and derivatives	Amino acids and derivatives	C13H18N2O5	2	0.9223	-	21658.2	22388.5	12228.1	29796	27318.5	29128.7	1.10744	0.0860024	0.22151	0.652512	-0.615924	insig
MW0139305	Peonidin-3-O-beta-galactopyranoside	Flavonoids	Anthocyanidins	C22H23O11+	2	0.9187	-	1.35122e+06	1.38302e+06	1.35432e+06	1.72355e+06	1.64031e+06	1.50088e+06	1.31642	0.0545153	0.161741	0.840447	-0.250771	insig
MW0015479	12(13)Ep-9-KODE	Lipids	Free fatty acids	C18H30O4	2	0.9098	-	187734	164177	179451	143195	105126	115078	1.29668	0.0204409	0.0856734	1.4622	0.548139	insig
MW0011789	1-(1Z-hexadecenyl)-sn-glycero-3-phosphocholine	GP	PC	C24H50NO6P	2	0.9067	-	7697.8	4994.1	6347.16	19632.2	15925.4	5431.39	0.893687	0.224771	0.408785	0.464492	-1.10627	insig
MW0134494	Naringenin 7-0-glucoside	Benzene and substituted derivatives	Benzene and substituted derivatives	C21H22O10	2	0.8992	-	128057	123952	144243	133189	137298	227816	0.707032	0.385805	0.57127	0.795203	-0.330605	insig
MW0123204	Cannabinol	Phenolic acids	Phenolic acids	C21H26O2	2	0.8972	-	15.67	118.98	715.51	257.86	104.59	2758.06	0.60412	0.474613	0.64087	0.272443	-1.87598	insig
MW0108413	N-Phenethylacetamide	Benzene and substituted derivatives	Benzene and substituted derivatives	C10H13NO	2	0.8862	-	11877	11669	11564.8	7947.44	7671.95	7514.73	1.4535	3.00344e-05	0.00265935	1.51771	0.601896	insig
MW0130459	Methyl 2,5-dihydroxycinnamate	Organic acids	Organic acids	C10H10O4	2	0.8823	-	126040	126721	117875	129984	124570	138731	0.878365	0.215051	0.400436	0.942412	-0.0855699	insig
MW0143452	Azacyclonol	Benzene and substituted derivatives	Benzene and substituted derivatives	C18H21NO	2	0.8784	-	601.93	279	141.17	1059.46	1063.51	306.7	0.881524	0.197261	0.37802	0.420674	-1.24922	insig
MW0131331	3-(4-Hydroxy-3-methoxyphenyl)-2-propenoic acid	Organic acids	Organic acids	C10H10O4	2	0.8643	-	945.1	359.62	314.2	5862.52	1304.72	274.82	0.676277	0.375506	0.561795	0.217537	-2.20067	insig
MW0054380	Ethyl alpha-linolenate	Lipids	Free fatty acids	C20H34O2	2	0.8636	-	2713.13	4654.29	1534.9	10246.3	11264.9	18078.7	1.32109	0.0401898	0.132824	0.224863	-2.15288	down
MW0140002	14,15-DiHETE	Lipids	Free fatty acids	C20H32O4	2	0.8595	-	72925.8	72413.4	87958.1	89924.5	153967	189818	1.13874	0.14579	0.311019	0.537912	-0.894558	insig
MW0006876	Dioctyl phthalate	Benzene and substituted derivatives	Benzene and substituted derivatives	C24H38O4	2	0.8402	-	20198.1	19779.5	22818.2	18333.1	8034.69	17351.5	0.901175	0.185311	0.363781	1.43634	0.522399	insig
MW0110042	Tris(2-butoxyethyl) phosphate	Others	Lactones	C18H39O7P	2	0.8358	-	75367	93160.6	77995.2	77578.8	64329.8	98632.1	0.183984	0.872123	0.927565	1.02487	0.035441	insig
MW0012778	1-Docosanoyl-sn-glycero-3-phosphocholine	GP	PC	C30H62NO7P	2	0.8151	-	111585	56325.7	59671.6	98803.5	117158	64756.5	0.554334	0.495117	0.656466	0.810715	-0.302733	insig
MW0110992	Dicyclohexylamine	Alcohol and amines	Amines	C12H23N	2	0.8048	-	95.05	268.11	196.25	1142.3	1440.43	1858.17	1.39121	0.0199977	0.0846071	0.125968	-2.98887	down
MW0115119	Phenol glucuronide	Benzene and substituted derivatives	Benzene and substituted derivatives	C12H14O7	2	0.803	-	648680	1.03999e+06	685228	627678	682416	690168	0.642165	0.423898	0.598262	1.18679	0.247068	insig
MW0111242	N-(2-Hydroxyethyl)hexadec-9-enamide	Alcohol and amines	Amines	C18H35NO2	2	0.7945	-	100.34	348.1	462.31	1948.69	1484.68	1863.98	1.30904	0.00165757	0.0187733	0.171926	-2.54014	down
MW0011908	Dioleoyl phosphatidylserine	GP	PS	C42H78NO10P	2	0.7882	-	296739	111180	68566.1	3062.69	60274.9	26017.8	1.05155	0.202026	0.385139	5.33247	2.41481	up
MW0001379	1,5-Naphthalenediamine	Benzene and substituted derivatives	Benzene and substituted derivatives	C10H10N2	2	0.788	-	403397	417602	420844	216059	222087	214860	1.457	0.00013411	0.00540732	1.90173	0.927316	insig
MW0011898	1,2-Dioctanoyl-sn-glycerol	GL	DG	C19H36O5	2	0.7856	-	2330.94	7611.56	3038.73	7312.33	4137.18	4358.09	0.506901	0.658306	0.781823	0.821202	-0.284191	insig
MW0116901	1-Benzylimidazole	Benzene and substituted derivatives	Benzene and substituted derivatives	C10H10N2	2	0.7829	-	115495	39644.8	113410	44641.1	96192.3	100476	0.10161	0.783702	0.869055	1.11289	0.154305	insig
MW0106526	3-phenyl-2-(pyrrolidine-2-carbonylamino)propanoic Acid	Amino acids and derivatives	Amino acids and derivatives	C14H18N2O3	2	0.781	-	792.53	175.38	605.4	468.1	250.45	1284.52	0.210427	0.718556	0.823308	0.785449	-0.34841	insig
MW0008844	1-(Naphthalen-2-yl)-2-(pyrrolidin-1-yl)pentan-1-one	Benzene and substituted derivatives	Benzene and substituted derivatives	C19H23NO	2	0.7795	-	8490.34	6312.09	8053.3	29674	20705.2	23909	1.41984	0.0177006	0.0789479	0.307663	-1.70058	down
MW0105002	(2R)-3-(5-acetamido-2-hydroxyphenyl)sulfanyl-2-azaniumylpropanoate	Amino acids and derivatives	Amino acids and derivatives	C11H14N2O4S	2	0.7748	-	186055	175836	187361	163858	162442	167411	1.34795	0.0239762	0.0960002	1.1125	0.153802	insig
MW0015862	1-O-Hexadecyl-2-arachidonoyl-sn-glycero-3-phosphocholine	Benzene and substituted derivatives	Benzene and substituted derivatives	C44H82NO7P	2	0.7746	-	729.58	288.05	1852.84	84.25	991.8	1987.41	0.18659	0.933249	0.963354	0.937003	-0.093875	insig
MW0011860	1,2-Dimyristoleoyl-sn-glycero-3-phosphocholine	GP	PC	C36H68NO8P	2	0.7738	-	7891.45	3976.66	4193.88	30899.4	33637.8	22625	1.40108	0.0108242	0.057653	0.184277	-2.44005	down
MW0016968	Cedrol	Alcohol and amines	Alcohols	C15H26O	2	0.7724	-	69664.1	64849.6	65818.5	239153	69766.6	65730.1	0.668793	0.416251	0.592838	0.53472	-0.903146	insig
MW0139667	Schisandrin	Heterocyclic compounds	Heterocyclic compounds	C24H32O7	2	0.7723	-	303410	306402	63792.2	71875.3	383414	378644	0.178935	0.70473	0.812892	0.807744	-0.30803	insig
MW0131753	Oroxylin A-7-o-beta-D-glucuronide	Organic acids	Organic acids	C22H20O11	2	0.7717	-	14676.8	25470.1	26775.9	14307.5	28032.7	20920.4	0.155325	0.835637	0.903439	1.05789	0.0811945	insig
MADN0522	4-Acetamidobenzoic acid	Benzene and substituted derivatives	Benzene and substituted derivatives	C9H9NO3	2	0.7688	-	231812	270436	226042	225771	211094	205268	1.02349	0.164179	0.336024	1.13417	0.181643	insig
MW0063221	1-beta-D-Galactosylsphingosine	Lipids	Sphingolipids	C24H47NO7	2	0.7615	-	91290.3	86083.8	83355.4	111251	104666	92567.7	1.18054	0.0841732	0.218395	0.845194	-0.242645	insig
MW0115094	p-Cresol glucuronide	Benzene and substituted derivatives	Benzene and substituted derivatives	C13H16O7	2	0.7614	-	31552.7	21145.3	18516.6	999.31	1708.77	12317.6	1.17596	0.0260193	0.099819	4.73951	2.24474	up
MADP0516	4-(Butylamino)benzoic acid	Benzene and substituted derivatives	Benzene and substituted derivatives	C11H15NO2	2	0.7611	-	6010.19	3778.45	4327.39	3993.81	6569.98	5503.72	0.444893	0.552978	0.701355	0.878545	-0.186812	insig
MW0012973	1-Palmitoyl-2-oleoyl-sn-glycero-3-phosphate	GP	PA	C37H71O8P	2	0.7591	-	3760.76	12698.3	11483.2	12102.2	5833.81	711.59	0.571998	0.514087	0.671139	1.49844	0.583457	insig
MW0007428	Isopropyl 4-hydroxybenzoate	Benzene and substituted derivatives	Benzene and substituted derivatives	C10H12O3	2	0.7587	-	223272	237362	221328	175558	176655	190248	1.39894	0.00259084	0.0242373	1.25716	0.330171	insig
MW0106482	Disuccinimidyl suberate	Others	Lactones	C16H20N2O8	2	0.7577	-	35503.3	31988.7	30662.1	15884.6	16843.5	16399.3	1.44576	0.00619115	0.041329	1.99795	0.998521	insig
MW0114300	Disialyllactose	Others	Saccharides	C34H56N2O27	2	0.7573	-	10289.8	11930.1	407.48	7088.05	6829.59	6753.65	0.398241	0.872949	0.92771	1.09463	0.130442	insig
MW0014650	5,8,11,14-Eicosatetraynoic acid	Lipids	Free fatty acids	C20H24O2	2	0.7523	-	1282.59	1489.8	185.75	1309.84	309.34	2629.56	0.284444	0.618476	0.753154	0.696239	-0.522345	insig
MADP0513	N-(2-Hydroxyethyl)nicotinamide	Alcohol and amines	Amines	C8H10N2O2	2	0.7515	-	21039.4	27956.8	19837.4	20690.5	16786	19060.9	0.892801	0.242958	0.429121	1.21749	0.283908	insig
MW0126993	xi-Tetrahydro-6-propyl-2H-pyran-2-one	Others	Ketone compounds	C8H14O2	2	0.7514	-	15859.8	10891.3	16271.9	16720	13895	21131.5	0.676394	0.348086	0.535068	0.831419	-0.266353	insig
MW0106558	(2R)-piperidin-1-ium-2-carboxylate	Organic acids	Organic acids	C6H11NO2	2	0.7474	-	4146.34	3923.44	1861.17	8452.54	8131.48	518.42	0.0412663	0.457238	0.627069	0.580674	-0.784199	insig
MW0009362	Pentylone	Benzene and substituted derivatives	Benzene and substituted derivatives	C13H17NO3	2	0.7471	-	1095.89	938.63	2874.88	788.35	106.94	825.5	0.927314	0.222837	0.407034	2.85299	1.51248	insig
MW0104412	(2R,6S)-2,6-Diaminoheptanedioic acid	Organic acids	Organic acids	C7H14N2O4	2	0.7463	-	6520	29391.8	12587.7	7129.76	4176.48	10267.5	0.818517	0.318774	0.507641	2.24808	1.16869	insig
MW0120565	4-Hydroxy Triamterene	Benzene and substituted derivatives	Benzene and substituted derivatives	C12H11N7O	2	0.7451	-	111957	110065	111229	102952	95485.8	104242	1.26517	0.0596489	0.171666	1.101	0.138817	insig
MW0011795	1-(1Z-octadecenyl)-sn-glycero-3-phosphocholine	GP	PC	C26H54NO6P	2	0.7364	-	4057.04	1818.45	17199	5168.03	3944.75	10104.9	0.164077	0.821377	0.894736	1.20069	0.263868	insig
MW0106515	Leucylvaline	Amino acids and derivatives	Amino acids and derivatives	C11H22N2O3	2	0.736	-	75948.1	72313.6	69312.6	87077.6	93701.2	89486.2	1.39232	0.00298368	0.0262096	0.805041	-0.312866	insig
MW0169279	Huperzine-A	Heterocyclic compounds	Heterocyclic compounds	C15H18N2O	2	0.7356	-	3257.44	14006.9	376944	45173.1	492.59	56483.2	0.298345	0.511937	0.66957	3.85916	1.94829	insig
MW0116804	10-Acetyl-3,7-dihydroxyphenoxazine	Heterocyclic compounds	Heterocyclic compounds	C14H11NO4	2	0.7333	-	417414	424420	415360	338205	303002	337656	1.39991	0.0119299	0.0615895	1.28434	0.361028	insig
MADP0515	6-Aminonicotinamide	Nucleotides and derivatives	Nucleotides and derivatives	C6H7N3O	2	0.7314	-	855.32	291.84	248.62	431.6	487.03	506.66	0.327284	0.96456	0.980859	0.979295	-0.0301839	insig
MW0013074	2,2-Dimethylbutyric acid	Organic acids	Organic acids	C6H12O2	2	0.7308	-	29195.6	46581.8	22465.7	35861.9	49619.8	42368.3	0.791794	0.312615	0.501577	0.768425	-0.380024	insig
MW0168189	Patchouli alcohol	Alcohol and amines	Alcohols	C15H26O	2	0.7305	-	2582.4	1611.6	4323.32	1366.64	4292.57	2400.99	0.135344	0.902498	0.945975	1.05671	0.0795839	insig
MW0135000	Flavone base + 3O, O-HexA, C-Hex, C-Hex	Organic acids	Organic acids	C33H38O21	2	0.7253	-	6792	5374.49	18631.9	20972	6791.3	23276.4	0.632497	0.369858	0.556029	0.603419	-0.728767	insig
MW0138309	CID 75130910	Others	Lactones	C28H34O10	2	0.7225	-	297.79	3909.81	4040.02	2408.38	2936.02	132.26	0.290788	0.574469	0.719393	1.50596	0.590682	insig
MW0012843	1-Tetracosanoyl-sn-glycero-3-phosphocholine	Lipids	LPC	C32H66NO7P	2	0.7213	-	243.79	860.51	189.51	170.4	156.79	65.12	0.99424	0.296364	0.485754	3.29793	1.72156	insig
MW0008784	N(4)-Acetylsulfamethazine	Benzene and substituted derivatives	Benzene and substituted derivatives	C14H16N4O3S	2	0.7192	-	1890.87	17.07	114.95	13709.6	8024.53	6770.04	1.20651	0.0449339	0.141612	0.0709683	-3.81668	down
MW0168256	3,7-Dimethyl-9-(2,6,6-trimethylcyclohex-1-en-1-yl)nona-2,4,6,8-tetraenoic acid	Others	Vitamin	C20H28O2	2	0.7183	-	380357	351649	321750	897129	404135	422182	0.913261	0.300321	0.488855	0.611424	-0.709754	insig
MW0006730	Desacetyl-nitazoxanide	Benzene and substituted derivatives	Benzene and substituted derivatives	C10H7N3O4S	2	0.7152	-	1212.84	757.09	2265.27	43821.8	38416.6	40151.5	1.43473	0.000813601	0.0130127	0.0346042	-4.85291	down
MW0011914	1,2-Dipalmitoleoyl-sn-glycero-3-phosphoethanolamine	GP	PE	C37H70NO8P	2	0.7118	-	10391.4	8357.45	13145.5	12878.7	4037.07	12078.5	0.354125	0.779261	0.866987	1.10003	0.13754	insig
MW0122491	7-Hydroxymethotrexate	Heterocyclic compounds	Heterocyclic compounds	C20H22N8O6	2	0.7102	-	5909.49	3122.84	86.41	4424.43	115.84	4078.51	0.0364459	0.942778	0.967739	1.05801	0.0813508	insig
MW0139960	Wuweizisu C	Lignans and Coumarins	Lignans	C22H24O6	2	0.7019	-	5810.53	82.86	340.24	5449.88	83.24	118.31	0.147638	0.943708	0.96843	1.10302	0.141457	insig
MW0146362	Aspartylmethionine	Amino acids and derivatives	Amino acids and derivatives	C9H16N2O5S	3	0.9995	-	2.84854e+06	2.71142e+06	3.02494e+06	2.97185e+06	3.20089e+06	3.1441e+06	1.06264	0.103859	0.249856	0.921439	-0.118039	insig
MW0055636	1-(9Z-hexadecenoyl)-2-(9Z-tetradecenoyl)-glycero-3-phosphate	GP	PA	C33H61O8P	3	0.9838	-	2779.74	1774.85	2394.22	5352.97	5358.19	7068.08	1.38129	0.0112608	0.0594124	0.390838	-1.35536	down
MW0004036	Isovanillic acid	Benzene and substituted derivatives	Benzene and substituted derivatives	C8H8O4	3	0.9733	-	156648	162587	162303	291717	278026	278145	1.45529	0.000291022	0.00809148	0.567927	-0.816222	insig
MEDP0638	1-(9Z-hexadecenoyl)-glycero-3-phosphoethanolamine	GP	LPE	C21H42NO7P	3	0.9638	-	1003.43	1473.05	1538.65	6090.78	4287.03	20451.2	1.28302	0.222515	0.407034	0.130239	-2.94077	down
MW0129493	1-(2,4-dihydroxyphenyl)-3-{3-[(3,3-dimethyloxiran-2-yl)methyl]-4-hydroxyphenyl}propan-1-one	Others	Ketone compounds	C20H22O5	3	0.9567	-	85485.1	70509.6	76130.9	78002.1	62094.7	73669	0.625087	0.396872	0.579771	1.08589	0.118875	insig
MEDP1686	1-Pentadecanoyl-glycero-3-phosphoethanolamine	Lipids	LPC	C20H42NO7P	3	0.9499	-	4031.01	4513	5058.45	5303.72	9381.44	4898.81	0.879879	0.296762	0.485754	0.694571	-0.525806	insig
MEDN1530	Cellobiose	Others	Saccharides	C12H22O11	3	0.9485	-	3.93781e+06	3.24671e+06	4.08166e+06	1.89038e+06	1.81589e+06	928633	1.29552	0.00586077	0.0401957	2.43072	1.28139	up
MW0059301	PE-NMe(15:0/18:3(6Z,9Z,12Z))	GP	PE	C39H72NO8P	3	0.9484	-	27186.5	14768	9662.4	9749.94	12798.5	12055.3	0.659886	0.38981	0.574457	1.49165	0.576913	insig
MW0112501	3,4,5-trihydroxy-6-[3-(4-hydroxy-3-methoxyphenyl)oxirane-2-carbonyloxy]oxane-2-carboxylic acid	Organic acids	Organic acids	C16H18O11	3	0.9462	-	211296	255909	242553	257438	200653	212892	0.433698	0.586133	0.728735	1.05779	0.0810514	insig
MEDL02283	3-Methoxyanthranilate	Phenolic acids	Phenolic acids	C8H9NO3	3	0.9415	-	4737.23	4681.37	6293.6	17919.8	18676.8	1085.93	0.242602	0.329997	0.516563	0.416964	-1.26201	insig
MW0056323	PA(22:5(4Z,7Z,10Z,13Z,16Z)/22:6(4Z,7Z,10Z,13Z,16Z,19Z))	GP	PA	C47H71O8P	3	0.9314	-	123833	83567.8	27024.2	267670	86584.6	99981	0.759278	0.342622	0.529526	0.516087	-0.954314	insig
MW0114089	cis-Ferulic acid [arabinosyl-(1->3)-[glucosyl-(1->6)]-glucosyl] ester	Organic acids	Organic acids	C27H38O18	3	0.9227	-	37764.6	34651.3	36512.7	45423.2	43118.7	39655	1.26306	0.0418029	0.136135	0.849698	-0.234978	insig
MW0114982	N-di-Demethyl roxithromycin	Others	Lactones	C40H74N2O14	3	0.9153	-	32899.1	60191.8	33660.3	15997.8	60429.6	75907.4	0.044781	0.700111	0.809495	0.832057	-0.265246	insig
MW0132690	3,5,7-Trihydroxy-2-(4-hydroxyphenyl)-6,8-dimethoxychromen-4-one	Others	Ketone compounds	C17H14O8	3	0.9128	-	110667	136739	102349	131778	116964	107241	0.149424	0.87786	0.930867	0.982503	-0.025466	insig
MEDP1857	N-(2-hydroxyethyl)icosanamide	Organic acids	Organic acids	C22H45NO2	3	0.8971	-	161.2	42.46	163.29	356.6	135.91	340.08	0.925872	0.148302	0.31426	0.440733	-1.18202	insig
MEDP2189	Hexadecylamine	Alcohol and amines	Amines	C16H35N	3	0.894	-	4501.9	785.37	201.86	16076.1	1488.26	9239.92	0.931908	0.228399	0.413704	0.204785	-2.28782	insig
MEDP1124	15-Hydroxy-5,8,11,13-eicosatetraenoic acid	Lipids	Free fatty acids	C20H32O3	3	0.8883	-	1506.84	4965.39	3839.12	5040.7	3136.8	8802.28	0.713189	0.330264	0.516563	0.607272	-0.719585	insig
MEDP1990	Polydextrose	Others	Saccharides	C12H22O11	3	0.8859	-	995.1	2492.53	1590.15	8606.27	1856.06	914.14	0.426719	0.478742	0.643956	0.446341	-1.16378	insig
MW0015804	annoglacin A	FA	Others	C37H68O7	3	0.8777	-	1.43534e+06	478569	361269	409213	2.58724e+06	683822	0.364493	0.584454	0.72732	0.618209	-0.693832	insig
MW0128921	{[(6E)-3-oxo-1,7-diphenylhept-6-en-2-yl]oxy}sulfonic acid	Organic acids	Organic acids	C19H20O5S	3	0.8743	-	2861.36	675.09	2805.63	663.59	1029.26	1488	0.677254	0.278022	0.466883	1.99383	0.995544	insig
MW0010733	VERBENONE	Terpenoids	Monoterpenoids	C10H14O	3	0.8667	-	145327	149989	151040	151800	124750	131138	0.899274	0.25233	0.438911	1.09485	0.130731	insig
MW0057099	PC(18:3(6Z,9Z,12Z)/20:5(5Z,8Z,11Z,14Z,17Z))	GP	PC	C46H76NO8P	3	0.847	-	283867	58680.4	25800	118327	81573.4	40752.1	0.0281511	0.657246	0.781516	1.53062	0.614119	insig
MW0129290	{4-[2,3-Dioxo-3-(2,4,6-trihydroxy-3-methoxyphenyl)propyl]-2-hydroxy-6-methoxyphenyl}oxidanesulfonic acid	Organic acids	Organic acids	C17H16O12S	3	0.8469	-	81278.1	70848.7	71764.9	151107	162020	188183	1.43212	0.00905565	0.0521605	0.446614	-1.1629	down
MEDP1212	1,3-Dicyclohexylurea	Alcohol and amines	Polyamines	C13H24N2O	3	0.8466	-	78002.8	75334.9	73147.9	94799.4	88287.3	91513.4	1.40196	0.00316324	0.0270789	0.824783	-0.277914	insig
MW0127783	1-Hydroxy-1,7-bis(4-hydroxy-3-methoxyphenyl)-(6e)-6-heptene-3,5-dione	Others	Ketone compounds	C21H22O7	3	0.8376	-	3022.56	3840.71	18267.4	5420	4397.06	8698.62	0.00902609	0.704054	0.812696	1.35727	0.440704	insig
MW0139106	Naringin 6''-rhamnoside	Flavonoids	Flavones	C33H42O18	3	0.8282	-	4273.78	87	250.65	1514.24	3046.83	1534.92	0.758836	0.760722	0.856529	0.756469	-0.402646	insig
MW0134081	CID 74977688	Others	Ketone compounds	C27H30O15	3	0.8257	-	49604.4	19617.4	676.84	21433.4	44707.2	55962.2	0.701608	0.381808	0.567858	0.572457	-0.80476	insig
MW0061278	PG(a-13:0/18:2(9Z,11Z))	GP	PG	C37H69O10P	3	0.8228	-	8.83812e+06	8.97053e+06	8.98407e+06	1.0034e+07	9.54442e+06	9.31788e+06	1.25261	0.0737962	0.199028	0.927204	-0.109041	insig
MW0013479	2-Hexaprenyl-3-methyl-6-methoxy-1,4 benzoquinone	Benzene and substituted derivatives	Benzene and substituted derivatives	C38H56O3	3	0.8225	-	151718	138414	152732	154362	142658	151429	0.235382	0.765349	0.858937	0.987545	-0.018082	insig
MW0166040	1-Palmitoyl-2-vernoloyl-phosphatidylcholine	GL	DG	C42H80NO9P	3	0.8195	-	771400	1.58727e+06	630088	21997	6267.19	438.42	1.3376	0.0804533	0.212296	104.128	6.70222	up
MW0012773	1-arachidonoyl-sn-glycero-3-phospho-1D-myo-inositol	GP	PI	C29H49O12P	3	0.8124	-	35784.8	32265.9	33071.6	26134.2	28223.5	26.73	0.699572	0.226812	0.411754	1.8594	0.894835	insig
MW0061296	PG(i-12:0/18:2(9Z,11Z))	GP	PG	C36H67O10P	3	0.8053	-	315866	307630	310483	354755	342972	340269	1.40362	0.00581559	0.0400828	0.899791	-0.152339	insig
MW0055977	PA(20:2(11Z,14Z)/22:6(4Z,7Z,10Z,13Z,16Z,19Z))	GP	PA	C45H73O8P	3	0.8039	-	31893.7	36307.8	28343.3	43721.5	55592.6	50306.7	1.32776	0.0171124	0.0774379	0.645263	-0.632041	insig
MW0013475	2-Hexaprenyl-3-methyl-5-hydroxy-6-methoxy-1,4-benzoquinone	Alcohol and amines	Alcohols	C38H56O4	3	0.7939	-	7945.43	583.78	2103.69	8426.09	4002.83	6328.71	0.799902	0.367461	0.554077	0.566857	-0.818942	insig
MW0014958	6-[2,4-dihydroxy-1-(1-oxo-1H-isochromen-3-yl)butoxy]-3,4,5-trihydroxyoxane-2-carboxylic acid	Organic acids	Organic acids	C19H22O11	3	0.7919	-	15422.5	28395.3	9087.39	27206.7	2203.46	19059.4	0.346699	0.881859	0.932998	1.09151	0.126329	insig
MW0012983	1-Phosphatidyl-1D-myo-inositol 3,4-bisphosphate	GP	PA	C11H21O19P3	3	0.7895	-	1.21343e+06	1.06091e+06	1.24913e+06	1335575	1.40102e+06	1.26056e+06	1.07296	0.0965273	0.237751	0.881497	-0.181972	insig
MW0021617	CL(8:0/10:0/10:0/11:0)	GL	CL	C48H92O17P2	3	0.7892	-	5223.74	4470.21	11300	8728.41	3585.66	14032.2	0.247951	0.658209	0.781823	0.796847	-0.327625	insig
MW0055682	PA(18:0/22:6(4Z,7Z,10Z,13Z,16Z,19Z))	GP	PA	C43H73O8P	3	0.7871	-	6.11321e+06	6.01674e+06	6.1324e+06	6.87945e+06	6.56974e+06	6.58733e+06	1.37827	0.0184021	0.0807213	0.911453	-0.133759	insig
MW0128601	[2-Hydroxy-1-(1-oxoisochromen-3-yl)butyl] hydrogen sulate	Organic acids	Organic acids	C13H14O7S	3	0.7854	-	34968.5	26361.1	36457.4	51962.7	50148.3	48757.3	1.322	0.0228547	0.0930809	0.648161	-0.625576	insig
MW0115350	Tetraethylene glycol	Alcohol and amines	Alcohols	C8H18O5	3	0.785	-	25483.5	21848.4	19088.2	29841.3	32313.2	27446	1.23415	0.0325176	0.11572	0.741292	-0.431887	insig
MEDP2121	Pentadecylamine	Alcohol and amines	Amines	C15H33N	3	0.7736	-	1.34488e+06	1.36872e+06	1.33781e+06	1.68012e+06	1.57351e+06	1.52258e+06	1.37117	0.0308271	0.111276	0.848249	-0.237441	insig
MW0053727	Glycerol trisinapate	GL	TG	C36H38O15	3	0.7667	-	7531.38	4721.12	5415.51	7731.62	3767.06	6774.76	0.0223718	0.897661	0.943281	0.966868	-0.0486087	insig
MEDP0798	1-Naphthylamine	Alkaloids	Alkaloids	C10H9N	3	0.7659	-	3299.36	2779.69	37.13	75503.9	64213.1	70246.8	1.22987	0.00105307	0.014591	0.0291297	-5.10137	down
MW0134272	1-(3,4,5-Trihydroxyphenyl)-3-(2,4,6-trihydroxyphenyl)-2-propanol	Benzene and substituted derivatives	Benzene and substituted derivatives	C15H16O7	3	0.753	-	60034.2	54815.6	55083.5	95666.3	58737.3	63309.9	0.857838	0.303276	0.492076	0.780536	-0.357463	insig
MW0130720	Benzyltartronic acid	Organic acids	Organic acids	C10H10O5	3	0.7481	-	999.6	1590.43	414.7	20940.8	22229.4	32210.8	1.41561	0.020319	0.0854288	0.0398606	-4.64889	down
MW0128125	(3-{8-[1-(2,4-dihydroxyphenyl)-3-(3,4-dihydroxyphenyl)-2-hydroxypropyl]-3,5,7-trihydroxy-3,4-dihydro-2H-1-benzopyran-2-yl}phenyl)oxidanesulfonic acid	Organic acids	Organic acids	C30H28O13S	3	0.7475	-	5062.5	3481.68	5285.94	8049.03	3089.06	5835.04	0.33654	0.552364	0.700797	0.814824	-0.295439	insig
FDATN00516	Benznidazole	Benzene and substituted derivatives	Benzene and substituted derivatives	C12H12N4O3	3	0.7463	-	1375.77	6576.23	1768.86	320.08	1083.51	1928.51	0.865517	0.330145	0.516563	2.91734	1.54465	insig
MEDP1063	Indole-5-carboxylic acid	Alkaloids	Plumerane	C9H7NO2	3	0.7457	-	72283.5	64476.3	62959.7	34314.9	42030.5	24221.4	1.3206	0.00996543	0.0553452	1.98594	0.989821	insig
MEDP0535	TRIETHYL PHOSPHATE	Organic acids	Organic acids	C6H15O4P	3	0.744	-	4890.04	5827.05	2104.54	21020.3	2623.55	16802.1	0.772387	0.236914	0.422676	0.317007	-1.65742	insig
MW0167804	[2-hexadecanoyloxy-3-[hydroxy-[2-(methylamino)ethoxy]phosphoryl]oxypropyl] (Z)-octadec-9-enoate	GL	DG	C40H78NO8P	3	0.7438	-	5070.41	24262.7	7127.25	1757.05	1714.1	431.73	1.24455	0.215876	0.400975	9.34192	3.22372	up
MW0130194	2-(3,4-dimethoxyphenyl)-5,6,7,8-tetrahydroxy-3-methoxy-3,4-dihydro-2H-1-benzopyran-4-one	Benzene and substituted derivatives	Benzene and substituted derivatives	C18H18O9	3	0.7428	-	447.58	1224.59	749.95	4971.92	6587.07	6780.36	1.40021	0.00552648	0.0384849	0.132072	-2.9206	down
MW0061198	PG(18:3(6Z,9Z,12Z)/22:6(4Z,7Z,10Z,13Z,16Z,19Z))	GP	PG	C46H73O10P	3	0.7418	-	31870.4	13628.8	28678.3	469271	75492	40191.6	1.03536	0.341264	0.528207	0.126809	-2.97927	down
MW0054938	Methyl(Z)-5-(1-propynyl)-2-thienylacrylate	Others	Lactones	C11H10O2S	3	0.7407	-	55532.9	23376.8	47986.1	261973	214032	224598	1.39356	0.000803847	0.0130127	0.181124	-2.46495	down
MW0012942	1-Oleoyl-2-palmitoyl-sn-glycero-3-phosphocholine	GP	PC	C42H82NO8P	3	0.7393	-	76.66	120.62	3263.19	1593.09	817.88	66.11	0.166021	0.795065	0.878515	1.397	0.482328	insig
MW0128543	[2-(3,4-dihydroxyphenyl)-5,6,7-trihydroxy-4-oxo-3,4-dihydro-2H-1-benzopyran-3-yl]oxidanesulfonic acid	Organic acids	Organic acids	C15H12O11S	3	0.7371	-	8798.7	8940.24	5941.29	46876.2	22918.4	5592.69	0.808965	0.286147	0.475379	0.314115	-1.67064	insig
MW0057177	PC(18:4(6Z,9Z,12Z,15Z)/P-18:1(11Z))	GP	PC	C44H78NO7P	3	0.7369	-	21.7	93.76	132.23	2200.85	1959.09	245.53	1.22098	0.152783	0.320498	0.0562233	-4.15269	down
MW0106102	1-(D-3-Mercapto-2-methyl-1-oxopropyl)-L-proline	Organic acids	Organic acids	C9H15NO3S	3	0.7338	-	1050.75	1335.3	2442.03	4773.07	6086.06	3620.08	1.29864	0.0260854	0.0998825	0.333449	-1.58446	down
MW0135496	6-[3,7-dihydroxy-2-(3-hydroxyphenyl)-3,4-dihydro-2H-1-benzopyran-4-yl]-8-[2-(3,4-dihydroxyphenyl)-3,7-dihydroxy-3,4-dihydro-2H-1-benzopyran-4-yl]-2-(4-hydroxy-3-methoxyphenyl)-3,4-dihydro-2H-1-benzopyran-3,5,7-triol	Benzene and substituted derivatives	Benzene and substituted derivatives	C46H40O15	3	0.7328	-	76582.1	75881.2	91280.6	21336.9	20822.8	6553.21	1.32825	0.000742666	0.0126614	5.00368	2.32299	up
MW0061286	CID 131823277	GP	PG	C33H65O10P	3	0.7325	-	10949.3	12663.2	2582.39	8628.71	7132.13	1460.41	0.424386	0.480309	0.645105	1.52108	0.605096	insig
MW0132850	CID 75111068	Others	Ketone compounds	C33H40O21	3	0.7316	-	51140.2	43913.3	46820.1	58064.9	65730.2	69192.9	1.33315	0.0170886	0.0774171	0.735142	-0.443904	insig
MW0161889	docosanedioate	Lipids	Free fatty acids	C22H40O4-2	3	0.7292	-	418.19	58.58	215.62	381.65	220.19	96.8	0.148904	0.988272	0.993694	0.991054	-0.0129644	insig
MW0012979	1-Palmitoylglycerophosphocholine	GP	PC	C24H51NO7P+	3	0.7254	-	345192	377352	411186	897619	793623	736701	1.43023	0.00550318	0.0384048	0.466951	-1.09866	down
MW0124428	Indolo[2,1-b]quinazoline-6,12-dione	Alkaloids	Plumerane	C15H8N2O2	3	0.7243	-	22664.8	17204	15321.3	16159.5	16920.2	15563.3	0.627871	0.426844	0.60134	1.13459	0.182175	insig
MW0003283	2-Naphthoic acid	Benzene and substituted derivatives	Benzene and substituted derivatives	C11H8O2	3	0.7233	-	39943.5	44674.6	24506.9	47456.8	46789.9	27219.3	0.296464	0.671752	0.790804	0.898398	-0.154573	insig
MEDP0811	2-(Methylthio)benzothiazole	Alkaloids	Alkaloids	C8H7NS2	3	0.7205	-	448733	413327	478667	458937	596246	499228	0.922533	0.2166	0.401219	0.86253	-0.213353	insig
MW0003657	Mdpbp	Benzene and substituted derivatives	Benzene and substituted derivatives	C15H19NO3	3	0.7193	-	5193.96	3274.88	6391.77	382.7	1014.08	986.12	1.35458	0.0388088	0.129856	6.23635	2.6407	up
MEDL02614	Gancaonin D	Flavonoids	Isoflavones	C21H20O7	3	0.7185	-	65888.7	59264.7	62469.7	72121.6	64818.7	60480	0.556167	0.460939	0.630216	0.950374	-0.073432	insig
MW0112467	3,4,5-trihydroxy-6-[2-hydroxy-4-(2-hydroxy-3-methoxy-3-oxopropyl)phenoxy]oxane-2-carboxylic acid	Organic acids	Organic acids	C16H20O11	3	0.7161	-	36582.8	30665.4	38256.9	29392.8	27226.1	33989.4	0.918736	0.17985	0.356868	1.16441	0.219598	insig
MW0108657	N-Acetyl-S-(N-allylthiocarbamoyl)-L-cysteine	Amino acids and derivatives	Amino acids and derivatives	C9H14N2O3S2	3	0.7148	-	2.42325e+06	2.70242e+06	2.07781e+06	2.61735e+06	2.74047e+06	2.7984e+06	0.926755	0.215115	0.400436	0.883189	-0.179206	insig
MW0156201	Pteridine	Heterocyclic compounds	Pteridines and derivatives	C6H4N4	3	0.7141	-	5372.64	6752.16	7253.88	4220.39	5353.06	4200.97	1.18888	0.0592605	0.170915	1.40686	0.492479	insig
MW0055142	Muricatenol	FA	Others	C37H68O6	3	0.7126	-	2598.36	4012.12	1589.61	1751.91	2872.22	464.15	0.691746	0.353349	0.539661	1.61156	0.688462	insig
MW0127867	(2-{9-hydroxy-2-oxo-2H,8H,9H-furo[2,3-h]chromen-8-yl}-2-[(3-methylbut-2-enoyl)oxy]propoxy)sulfonic acid	Organic acids	Organic acids	C19H20O10S	3	0.7108	-	35415.5	52628.2	43329.6	80211.6	76762.9	226075	1.14925	0.229428	0.413905	0.342967	-1.54386	down
MW0117329	2-(1,3-dihydroxy-4-oxocyclohex-2-en-1-yl)-5-hydroxy-3,6,7-trimethoxy-4H-chromen-4-one	Others	Ketone compounds	C18H18O9	3	0.7105	-	3.59522e+06	3.79825e+06	3.37761e+06	4.29244e+06	4.46225e+06	4.32418e+06	1.36902	0.0132731	0.065216	0.823548	-0.280075	insig
MEDL00403	2-Hexadecenal	FA	Others	C16H30O	3	0.7101	-	1320.04	2410.81	2659.39	3617.77	2354.87	2844.72	0.833751	0.217247	0.401801	0.724734	-0.464477	insig
MW0146750	Biotinyl-5'-AMP	Nucleotides and derivatives	Nucleotides and derivatives	C20H28N7O9PS	3	0.709	-	2877.77	2816.63	3984.44	381.84	2348.25	2582.13	0.832368	0.161614	0.332738	1.822	0.865519	insig
MW0111912	2-(Hydroxymethyl)-6-(2,4,6-trihydroxyphenyl)oxane-3,4,5-triol	Alcohol and amines	Alcohols	C12H16O8	3	0.7068	-	5866.51	13546	11683.4	16444.5	16089.6	11242.2	0.819589	0.219765	0.404978	0.710335	-0.493429	insig
MEDL01986	Pleoside	Phenolic acids	Phenolic acids	C15H20O9	3	0.7063	-	281.95	332.46	100.83	152.45	107.77	189.39	0.603587	0.335491	0.522278	1.5908	0.669753	insig
MW0010810	(1(10)E,4E,6a,9b)-9-(2-Methylbutanoyloxy)-1(10),4,11(13)-germacratrien-12,6-olide	Others	Ketone compounds	C20H28O4	3	0.7047	-	8.58	162.8	118.96	1137.26	2746.14	1656.31	1.27245	0.0649055	0.181743	0.0524107	-4.254	down
MEDP0825	N-Cyclohexylformamide	Alkaloids	Alkaloids	C7H13NO	3	0.7034	-	52106	50654.6	53574.4	60928.9	62062.5	56582.5	1.3197	0.0263035	0.100445	0.870589	-0.199936	insig
MW0127315	3-Vinyl-4H-1,2-dithiin	Heterocyclic compounds	Heterocyclic compounds	C6H8S2	3	0.7032	-	207041	372419	359567	336967	414781	361496	0.653657	0.396276	0.579748	0.843504	-0.245533	insig
MW0132556	3,4,8,9,10-pentahydroxy-6-oxo-2-{5,6,7-trihydroxy-1-oxo-3-[1,3,4-trihydroxy-2-(sulfooxy)butyl]-1H-isochromen-8-yl}-6H-benzo[c]chromene-1-carboxylic acid	Organic acids	Organic acids	C27H20O21S	3	0.7027	-	6040.37	4810.36	19220.6	7628.54	4232.89	11487.1	0.190558	0.690234	0.802718	1.28793	0.365052	insig
MW0133911	5,6,7,8-Tetrahydroxy-2-(3,4,5-trihydroxyphenyl)chromen-4-one	Others	Ketone compounds	C15H10O9	3	0.7017	-	85963.2	85641.4	75280.5	2.75502e+06	2.56157e+06	2.39447e+06	1.45807	0.00173056	0.0192221	0.032017	-4.96502	down
MW0006383	Bisacodyl	Benzene and substituted derivatives	Benzene and substituted derivatives	C22H19NO4	3	0.7007	-	862.2	754.19	22.46	551	132.4	823.44	0.256657	0.901266	0.945836	1.08761	0.121158	insig
MW0110104	Trp-Cys	Amino acids and derivatives	Amino acids and derivatives	C14H17N3O3S	3	0.6989	-	11370.7	1456.8	2710.03	397.55	14574.3	1013.19	0.384783	0.980116	0.988946	0.972001	-0.0409697	insig
MW0112182	2-Keto-3-Deoxy-D-Mannooctanoic Acid	Organic acids	Organic acids	C8H14O8	3	0.6986	-	29681.8	6821.6	26458.5	25584.3	54623	67612.6	0.951046	0.137386	0.29862	0.425937	-1.23129	insig
MW0012203	Auda	FA	Others	C23H40N2O3	3	0.6972	-	491559	494631	479737	642198	716418	606288	1.38016	0.0338212	0.118994	0.746055	-0.422646	insig
MW0128713	[3,5-dihydroxy-2-(hydroxymethyl)-6-{2,4,6-trihydroxy-3-[3-(3-hydroxyphenyl)propanoyl]phenyl}oxan-4-yl]oxidanesulfonic acid	Organic acids	Organic acids	C21H24O13S	3	0.6963	-	1115.58	1652.68	2576.52	286.45	149.66	65.78	1.35674	0.0602803	0.173214	10.6493	3.41269	up
MW0104237	1-Aminocyclohexanecarboxylic acid	Benzene and substituted derivatives	Benzene and substituted derivatives	C7H13NO2	3	0.6958	-	213826	213415	204622	240170	236061	242248	1.4144	0.00263883	0.0244755	0.879445	-0.185334	insig
MW0017014	CerP(d18:1/12:0)	SL	Cer	C30H60NO6P	3	0.6949	-	12565.8	7035.99	11187.6	7905.16	1688.39	9954.16	0.725137	0.287445	0.476946	1.57509	0.655431	insig
MEDL01878	Methyl dioxindole-3-acetate	Alkaloids	Plumerane	C11H11NO4	3	0.6946	-	2541.44	4094.74	4380.55	9212.3	7337.06	6694.83	1.29861	0.0147041	0.0692647	0.473956	-1.07717	down
MEDL01752	Asparagoside C	Steroids	Steroidal saponins	C39H64O13	3	0.6918	-	122280	141439	129496	143505	155415	150850	1.18844	0.0564709	0.165353	0.874259	-0.193867	insig
MW0000473	tropinone	Alkaloids	Tropan alkaloids	C8H13NO	3	0.6903	-	154622	168789	159143	142619	143207	144597	1.32572	0.050724	0.153777	1.12112	0.164939	insig
MW0056825	PC(14:1(9Z)/18:4(6Z,9Z,12Z,15Z))	GP	PC	C40H70NO8P	3	0.6883	-	935.93	1853.65	3215.58	642.45	950.43	1627.97	0.788635	0.297091	0.485754	1.86446	0.898761	insig
MW0128759	[4-(5,7-dihydroxy-4-oxo-3,4-dihydro-2H-1-benzopyran-2-yl)-5-hydroxy-9,13,13-trimethyl-8-oxatetracyclo[7.4.1.0(2),.0(1)(2),(1)]tetradeca-2(7),3,5-trien-10-yl]oxidanesulfonic acid	Organic acids	Organic acids	C25H26O10S	3	0.6871	-	234579	244961	240475	6.13412e+07	2.13336e+07	2.32596e+06	1.32022	0.247611	0.433697	0.00847068	-6.88331	down
MW0009592	P-Toluenesulfonamide	Benzene and substituted derivatives	Benzene and substituted derivatives	C7H9NO2S	3	0.6865	-	31891	31328	30616.3	49636.5	46986.9	48846.2	1.4528	0.000390776	0.00910756	0.645051	-0.632515	insig
MW0137932	Deoxyschizandrin	Lignans and Coumarins	Lignans	C24H32O6	3	0.6856	-	536.3	180.28	581.54	113.36	131.71	154.56	1.17868	0.141004	0.303862	3.2483	1.69969	up
MW0062294	1-Tetradecanoyl-2-pentadecanoyl-glycero-3-phosphoserine	GP	PS	C35H68NO10P	3	0.6802	-	79599.3	193950	43907.5	88173.3	34396.4	52508.1	0.624295	0.408642	0.588655	1.81323	0.858564	insig
MW0112523	3,4,5-Trihydroxy-6-[4-(3-oxo-3-{2,3,4-trihydroxy-5-[hydroxy(3,4,5-trihydroxyoxan-2-yl)methyl]-6-oxo-3-[3,4,5-trihydroxy-6-(hydroxymethyl)oxan-2-yl]cyclohexa-1,4-dien-1-yl}propyl)phenoxy]oxane-2-carboxylic acid	Benzene and substituted derivatives	Benzene and substituted derivatives	C33H42O22	3	0.6791	-	76.09	703	6901.69	16427.6	5.8	18.96	0.441077	0.658206	0.781823	0.466851	-1.09897	insig
MW0112514	3,4,5-trihydroxy-6-[4-(1-hydroxy-3-oxobutyl)-2-methoxyphenoxy]oxane-2-carboxylic acid	Organic acids	Organic acids	C17H22O10	3	0.6785	-	21820	2770.49	47639.8	3825.23	32363.8	26024.4	0.0255158	0.84263	0.906479	1.16101	0.215379	insig
MEDP1515	Carnitine C9:0(2,6-Dimethylheptanoyl carnitine)	FA	CAR	C16H31NO4	3	0.6776	-	3538.97	26837.2	16919.5	45632.7	39674.2	38955.6	1.04413	0.0520352	0.156338	0.380611	-1.39361	down
MW0112458	3,4,5-trihydroxy-6-[2-hydroxy-3-(3-hydroxyprop-1-en-1-yl)phenoxy]oxane-2-carboxylic acid	Benzene and substituted derivatives	Benzene and substituted derivatives	C15H18O9	3	0.6767	-	80558.1	82362.6	79596.3	86304.8	130987	140057	1.12307	0.147421	0.313338	0.678655	-0.559251	insig
MEDTP01862	MG(18:4/0:0/0:0)	GL	MG	C21H34O4	3	0.6764	-	63258.1	107850	60881.2	93932.8	135154	26071.3	0.103389	0.841332	0.905808	0.9092	-0.137331	insig
MW0136873	Dipteryxin	Others	Ketone compounds	C17H14O6	3	0.6764	-	58.98	17.07	141.69	88.18	197.92	148.91	0.864484	0.210706	0.396623	0.50054	-0.998442	insig
MW0135080	6-(5-{8-[1-(2,4-dihydroxyphenyl)-3-(3,4-dihydroxyphenyl)-2-hydroxypropyl]-3,5,7-trihydroxy-3,4-dihydro-2H-1-benzopyran-2-yl}-2-hydroxyphenoxy)-3,4,5-trihydroxyoxane-2-carboxylic acid	Organic acids	Organic acids	C36H36O17	3	0.6741	-	309957	329046	335472	367742	317067	335482	0.601043	0.42727	0.60152	0.955095	-0.0662845	insig
MW0136471	6-{4-[3-(3,7-dimethylocta-2,6-dien-1-yl)-7-hydroxy-8-(4-hydroxy-3-methylbut-2-en-1-yl)-4-oxo-4H-chromen-2-yl]-3-hydroxyphenoxy}-3,4,5-trihydroxyoxane-2-carboxylic acid	Organic acids	Organic acids	C36H42O12	3	0.6726	-	701.96	285.32	585.76	538.32	172.62	506.57	0.458104	0.525534	0.680426	1.29201	0.369622	insig
MW0128535	[2-(2-hydroxypropan-2-yl)-6-(2-methylbut-3-en-2-yl)-7-oxo-2H,3H,7H-furo[3,2-g]chromen-3-yl]oxidanesulfonic acid	Organic acids	Organic acids	C19H22O8S	3	0.6696	-	4392.36	20983.3	22774.6	14208.1	621.39	225.85	0.948169	0.2162	0.400975	3.19821	1.67727	insig
MW0054251	Lactosylceramide (d18:1/12:0)	SL	Cer	C42H79NO13	3	0.6687	-	94019.8	154726	104872	8519.83	97823.3	145651	0.618856	0.503392	0.662381	1.40328	0.488801	insig
MW0057746	PC(DiMe(11,3)/MonoMe(11,3))	GP	PC	C47H83NO10P+	3	0.6686	-	11268.2	12498.8	12474.6	23060.5	19937.2	17256	1.37271	0.0350595	0.121339	0.601484	-0.733401	insig
FDATN00542	2-Hydroxy-1,4-naphthoquinone	Benzene and substituted derivatives	Benzene and substituted derivatives	C10H6O3	3	0.6682	-	72794.9	67756.6	79186.9	57977.1	61706.4	69291.8	1.0787	0.0941949	0.234131	1.16279	0.217589	insig
MW0112488	3,4,5-trihydroxy-6-[2-methoxy-4-(3-oxobut-1-en-1-yl)phenoxy]oxane-2-carboxylic acid	Benzene and substituted derivatives	Benzene and substituted derivatives	C17H20O9	3	0.6679	-	73050.3	67709.8	60253.6	45739.4	51632.5	40515.4	1.3186	0.0133428	0.0652891	1.45781	0.543805	insig
MW0128622	[2-hydroxy-5-(5,6,7-trihydroxy-4-oxo-4H-chromen-2-yl)phenyl]oxidanesulfonic acid	Organic acids	Organic acids	C15H10O10S	3	0.6673	-	580995	688683	487966	1.14859e+06	1.14242e+06	1.2738e+06	1.39923	0.00159872	0.0183648	0.493054	-1.02018	down
MW0000629	(2-methyl-3-oxo-1-phenylpropoxy)sulfonic acid	Benzene and substituted derivatives	Benzene and substituted derivatives	C10H12O5S	3	0.6668	-	387892	396812	483576	511092	451522	585391	1.0149	0.135453	0.29588	0.8193	-0.287537	insig
MW0055323	N-(dodecanoyl)-sphing-4-enine-1-phosphocholine	SL	SM	C35H71N2O6P	3	0.6667	-	574.54	634.8	273.98	809.88	1010.11	188.74	0.178246	0.567813	0.71357	0.738437	-0.437454	insig
MEDL01761	3',5-Dimethoxybibenzyl-3,4'-diol	Others	Stilbene	C16H18O4	3	0.6667	-	186742	147362	164055	181871	297596	196656	0.947613	0.239636	0.426178	0.736788	-0.440679	insig
MW0130968	3-(2,3-dihydroxy-4-methoxyphenyl)-8,8-dimethyl-2H,8H-pyrano[2,3-f]chromen-2-one	Others	Ketone compounds	C21H18O6	3	0.6659	-	714950	809196	639461	208703	212827	198721	1.44958	0.00861286	0.0506225	3.48827	1.80251	up
MW0015494	15-keto-PGF1alpha	Lipids	Free fatty acids	C20H34O5	3	0.6656	-	109875	115207	108156	116881	122162	113812	1.04116	0.11451	0.266275	0.944405	-0.0825217	insig
MW0130173	CID 14484601	Others	Ketone compounds	C27H30O16	3	0.6641	-	1.15459e+06	1.20011e+06	1.10929e+06	1.27125e+06	1.23977e+06	1.11401e+06	0.628574	0.39697	0.579771	0.955577	-0.0655553	insig
MW0104977	3-Aminocaproic acid	Organic acids	Organic acids	C6H13NO2	3	0.6608	-	1559.25	1191.6	58.54	34340.1	32470.7	37133.9	1.30916	0.000611855	0.011528	0.0270277	-5.20942	down
MW0131533	3,4,5-trihydroxy-6-({4-hydroxy-2-oxo-2H-furo[2,3-h]chromen-8-yl}oxy)oxane-2-carboxylic acid	Organic acids	Organic acids	C17H14O11	3	0.6594	-	68999.5	61542.1	87817.6	103720	89075.7	116072	1.17411	0.0523648	0.157095	0.706967	-0.500285	insig
MW0001391	1,6-Dimethoxypyrene	Benzene and substituted derivatives	Benzene and substituted derivatives	C18H14O2	3	0.6583	-	16511.3	29952.5	31217.2	38306.1	40420.5	33091.2	0.995445	0.121478	0.278174	0.694711	-0.525515	insig
MW0012640	17-Octadecynoic acid	Lipids	Free fatty acids	C18H32O2	3	0.6583	-	1100.5	2712.67	2013.42	6216.32	4406.17	1986.63	0.947901	0.198246	0.379544	0.462093	-1.11374	insig
MW0135344	6-[1-hydroxy-3-(4-hydroxyphenyl)propyl]-2,3-dimethoxyphenol	Benzene and substituted derivatives	Benzene and substituted derivatives	C17H20O5	3	0.6581	-	6.6935e+06	8.18115e+06	6.6509e+06	7.5642e+06	7.32242e+06	7.46072e+06	0.427528	0.641939	0.771015	0.963227	-0.0540527	insig
MW0013544	MG(0:0/18:2(9Z,12Z)/0:0)	GL	MG	C21H38O4	3	0.6574	-	23079.2	20282.9	27836.7	27902.6	12687.8	16882.8	0.677195	0.433481	0.606873	1.23882	0.308964	insig
MW0139116	Nevadensin	Flavonoids	Flavones	C18H16O7	3	0.6574	-	1.51499e+06	1.64404e+06	1.79742e+06	1.82458e+06	1.68697e+06	1.81354e+06	0.806701	0.275211	0.465059	0.930771	-0.103501	insig
MW0138521	Isorhamnetin 3-O-[4-Hydroxy-E-cinnamoyl-(->6)-b-D-glucopyranosyl-(1->2)-a-L-rhamnopyranoside]	Flavonoids	Flavones	C37H38O18	3	0.6566	-	371942	395473	315975	410081	419083	460056	1.10884	0.0817678	0.214361	0.840345	-0.250947	insig
MW0129556	1-(3,4-dihydroxyphenyl)-3-hydroxy-3-phenylpropan-1-one	Others	Ketone compounds	C15H14O4	3	0.6563	-	40063.4	42297.7	43962.8	57284.7	44704	42433.9	0.797145	0.320443	0.508471	0.874682	-0.193169	insig
MW0127901	(2E)-1-{3-[(3,3-dimethyloxiran-2-yl)methyl]-2,4,6-trihydroxyphenyl}-3-(4-hydroxyphenyl)prop-2-en-1-one	Others	Ketone compounds	C20H20O6	3	0.6561	-	19069.8	16786.5	16838	5002.34	3456.02	5043.33	1.43303	0.000285242	0.00804262	3.9028	1.96451	up
MW0113611	6-{[1,4-dihydroxy-1-(1-oxo-1H-isochromen-3-yl)butan-2-yl]oxy}-3,4,5-trihydroxyoxane-2-carboxylic acid	Organic acids	Organic acids	C19H22O11	3	0.6559	-	35429.3	48245.9	23778.6	41321.3	40732	30512.9	0.246343	0.843137	0.906782	0.954583	-0.0670581	insig
MW0055527	[(2R)-2-octanoyloxy-3-phosphonooxypropyl] decanoate	GP	PA	C21H41O8P	3	0.655	-	2233.99	1754.41	637.53	128.81	512.73	6133.28	0.359254	0.750953	0.849237	0.682812	-0.550439	insig
MW0137585	DL-Carbidopa	Heterocyclic compounds	Heterocyclic compounds	C10H14N2O4	3	0.6544	-	151463	141356	156614	161364	149300	153096	0.563972	0.453287	0.623684	0.969107	-0.0452718	insig
MW0132265	3,4,5-trihydroxy-6-{[8-(2-hydroxypropan-2-yl)-4-(3-hydroxypropyl)-2-oxo-2H,8H,9H-furo[2,3-h]chromen-5-yl]oxy}oxane-2-carboxylic acid	Organic acids	Organic acids	C23H28O12	3	0.6531	-	21196.5	19402.5	21657.9	24136.2	25428	21330.5	1.04934	0.125397	0.283727	0.878161	-0.187442	insig
MW0128905	{[(2E)-5-[6-(5,7-dihydroxy-4-oxo-3,4-dihydro-2H-1-benzopyran-2-yl)-7-hydroxy-2-methyl-2H-chromen-2-yl]-2-methylpent-2-en-1-yl]oxy}sulfonic acid	Organic acids	Organic acids	C25H26O10S	3	0.653	-	1.17867e+06	1.20931e+06	1.26938e+06	745694	770924	774337	1.45078	0.00148255	0.0176663	1.59644	0.674854	insig
MW0108360	N(1),N(12)-diacetylsperminium(2+)	Alcohol and amines	Polyamines	C14H32N4O2+2	3	0.653	-	7176.24	44360.4	9254.4	7519.71	8468.52	8919.74	0.631237	0.425943	0.6007	2.44062	1.28725	insig
MW0128826	[5-(5,7-dihydroxy-4-oxo-3,4-dihydro-2H-1-benzopyran-2-yl)-2-hydroxyphenyl]oxidanesulfonic acid	Organic acids	Organic acids	C15H12O9S	3	0.6516	-	1.42967e+06	1.57342e+06	1.40986e+06	1.63493e+06	1.61483e+06	1.69622e+06	1.22167	0.0562305	0.164924	0.892231	-0.164511	insig
MW0106365	4-Azaniumyl-4,5-dihydro-1,2-oxazol-3-olate	Organic acids	Organic acids	C3H6N2O2	3	0.6507	-	499550	508626	494727	408572	382919	395499	1.43775	0.000934196	0.0138992	1.26615	0.340445	insig
MW0106525	D-Phenylalanine	Organic acids	Organic acids	C9H11NO2	3	0.6498	-	287632	302606	302738	290970	306802	288186	0.222388	0.77576	0.86429	1.00792	0.0113811	insig
MEDP2074	Indirubin-3'-monoxime	Benzene and substituted derivatives	Benzene and substituted derivatives	C16H11N3O2	3	0.6494	-	37092.3	33633.9	34932.3	25430.4	29722.2	22209.4	1.27336	0.0327176	0.116124	1.36577	0.449712	insig
MW0136274	6-{3,5-dihydroxy-4-[2-(4-hydroxyphenyl)propanoyl]phenoxy}-3,4,5-trihydroxyoxane-2-carboxylic acid	Organic acids	Organic acids	C21H22O11	3	0.649	-	29700.7	26967.8	25462.1	10121.5	29984.4	23893.5	0.66906	0.412657	0.591901	1.2833	0.359859	insig
MW0056770	Pantoyllactone glucoside	FA	Others	C12H20O8	3	0.6484	-	20818.1	14478.1	19763.3	20874.4	26493.9	30612.8	1.07706	0.098501	0.240993	0.706062	-0.502134	insig
MW0059186	PE-NMe(11D3/9D3)	GP	PE	C44H76NO10P	3	0.6482	-	17376	13122.6	11203.4	12511.7	10639.4	11282.7	0.792897	0.314306	0.503489	1.21108	0.276293	insig
MW0131823	3,4,5-trihydroxy-6-[2-hydroxy-4-(3,5,6-trihydroxy-4-oxo-7-{[3,4,5-trihydroxy-6-(hydroxymethyl)oxan-2-yl]oxy}-4H-chromen-2-yl)phenoxy]oxane-2-carboxylic acid	Organic acids	Organic acids	C27H28O19	3	0.6481	-	10592.1	9202.07	9900.9	21397.8	22497.4	25400	1.44198	0.00430837	0.0331514	0.428531	-1.22253	down
MW0006821	Diethyl phthalate	Benzene and substituted derivatives	Benzene and substituted derivatives	C12H14O4	3	0.6476	-	221.15	470.9	1660.55	531.24	427	393.32	0.265785	0.531212	0.685454	1.74066	0.79963	insig
MW0118706	2-methyl-2-(4-methylpent-3-en-1-yl)-2H-chromene-6,8-diol	Alcohol and amines	Alcohols	C16H20O3	3	0.6466	-	68595.4	68478	87121.9	28535.2	31299.1	24007.6	1.4227	0.0105155	0.0573257	2.67402	1.41901	up
MW0005861	Benzanthrone	Alkaloids	Alkaloids	C17H10O	3	0.6463	-	600009	618586	682825	644243	576375	597597	0.581454	0.438699	0.611043	1.04576	0.0645537	insig
MW0145989	Asn-Phe	Amino acids and derivatives	Amino acids and derivatives	C13H17N3O4	3	0.6458	-	2536.67	208.5	401.71	351.03	8475.52	231.96	0.2087	0.549793	0.698413	0.347395	-1.52535	insig
MW0012804	1-Heptadecanoyl-glycero-3-phosphate	GP	PA	C20H41O7P	3	0.6454	-	6752.16	15665	15347.5	259.17	206.27	253.25	1.44344	0.0516016	0.155615	52.5465	5.71552	up
MW0049503	1-Myristoyl-3-eicsoatetraenoyl-sn-glycerol	GL	DG	C37H64O5	3	0.6443	-	58574.3	41009.2	48469.7	78854.2	99659.5	97332	1.35236	0.0081096	0.048949	0.536724	-0.897747	insig
MW0054500	LysoPA(22:0/0:0)	GP	LPA	C25H51O7P	3	0.6443	-	22051.1	20128.8	11580.7	2607.92	311.82	4295.54	1.20566	0.0291693	0.106831	7.45094	2.89742	up
MW0129677	Dibenzoylmethane	Benzene and substituted derivatives	Benzene and substituted derivatives	C15H12O2	3	0.6442	-	48787	124234	35910.9	41544.7	89172.8	166779	0.440871	0.556166	0.70407	0.702301	-0.509838	insig
MW0054153	11-Methyldodecanoic acid	Lipids	Free fatty acids	C13H26O2	3	0.6439	-	2963.12	4298.75	20056.5	55178.5	53426.6	34170.1	1.24689	0.0124699	0.0626914	0.191338	-2.3858	down
MW0130765	2'-Hydroxybenzoin	Others	Ketone compounds	C14H12O3	3	0.6427	-	3821.8	987.42	1300.89	4914.19	2801.58	5923.89	1.0294	0.122535	0.279922	0.447966	-1.15854	down
MW0112394	Quinol glucuronide	Organic acids	Organic acids	C12H14O8	3	0.6419	-	7326.91	7514.88	1622.9	4847.2	7945.48	3872.57	0.223923	0.97835	0.987906	0.987965	-0.0174676	insig
MW0135536	6-[4-(3-{3-[(3,3-dimethyloxiran-2-yl)methyl]-2,4,6-trihydroxyphenyl}-3-oxopropyl)-3-hydroxyphenoxy]-3,4,5-trihydroxyoxane-2-carboxylic acid	Organic acids	Organic acids	C26H30O13	3	0.6389	-	107412	115816	111739	45274.2	31023	16382.4	1.33781	0.00676368	0.0436185	3.61424	1.85369	up
MEDP1089	Humic acid	Organic acids	Organic acids	C9H9NO6	3	0.6388	-	7253.21	6720.62	9268.81	9092.09	9249.49	11963.3	1.03935	0.12654	0.284296	0.766961	-0.382774	insig
MW0064204	TG(10:0/8:0/8:0)	GL	TG	C29H54O6	3	0.6379	-	527.37	354.58	258.8	2589.17	2465.35	2204.22	1.42375	0.000253402	0.00740375	0.157155	-2.66974	down
MEDP2252	Phenylethylmalonamide	Benzene and substituted derivatives	Benzene and substituted derivatives	C11H14N2O2	3	0.6378	-	7.55799e+06	6.95184e+06	7.32684e+06	6.44359e+06	6.92516e+06	7.74987e+06	0.422906	0.611225	0.747712	1.034	0.0482374	insig
MW0123681	Dihydrorhodamine 123	Heterocyclic compounds	Heterocyclic compounds	C21H18N2O3	3	0.6362	-	21527.7	19116.5	20112.1	37315	36541.1	35477.9	1.4473	8.3686e-05	0.00421777	0.555695	-0.847635	insig
MW0131167	3-(3,5-dihydroxyphenyl)-2-(4-hydroxyphenyl)-4-[(E)-2-(4-hydroxyphenyl)ethenyl]-2,3-dihydro-1-benzofuran-5,6-diol	Benzene and substituted derivatives	Benzene and substituted derivatives	C28H22O7	3	0.6354	-	2648.1	4301.32	5000.01	5942.98	16910.8	7179.6	1.09283	0.221108	0.405741	0.397872	-1.32963	down
MW0111223	N-Nitrosodibutylamine	Alcohol and amines	Amines	C8H18N2O	3	0.6352	-	1922.24	1126.51	1252.99	15917.9	7521.7	5670.08	1.36428	0.118935	0.273958	0.147777	-2.75851	down
MW0114657	2,6-Dimethoxy-4-[(E)-3-(beta-D-glucopyranosyloxy)-1-propenyl]phenyl beta-D-glucopyranoside	Benzene and substituted derivatives	Benzene and substituted derivatives	C23H34O14	3	0.6327	-	567.51	1212.73	1040.7	1133.17	1801.9	1387.75	0.948618	0.14193	0.305044	0.652569	-0.615797	insig
MW0137149	8-[1-(2,4-dihydroxyphenyl)-2-hydroxy-3-(3-hydroxyphenyl)propyl]-2-(4-hydroxy-3-methoxyphenyl)-3,4-dihydro-2H-1-benzopyran-3,5,7-triol	Benzene and substituted derivatives	Benzene and substituted derivatives	C31H30O10	3	0.6318	-	2564.82	11565.3	6843.67	4062.6	6400.63	1394.57	0.603591	0.379343	0.566276	1.76877	0.822749	insig
MW0147047	Candicine	Alkaloids	Phenolamine	C11H18NO+	3	0.6317	-	10170.6	12244.9	9438.95	5447.23	6280.15	5385.78	1.39846	0.0191784	0.0827031	1.8614	0.896388	insig
MW0000023	(+/-)-6-Acetonyldihydrosanguinarine	Alkaloids	Isoquinoline alkaloids	C23H19NO5	3	0.6316	-	255229	304802	246395	375532	385928	365556	1.35486	0.0196513	0.0841066	0.715541	-0.482894	insig
MW0131999	3,4,5-trihydroxy-6-{[2-(3-hydroxyphenyl)-5-methoxy-6,8-dimethyl-4-oxo-3,4-dihydro-2H-1-benzopyran-7-yl]oxy}oxane-2-carboxylic acid	Organic acids	Organic acids	C24H26O11	3	0.6308	-	564.43	1576.33	7391.28	1505.33	927.16	189.63	0.702246	0.392333	0.576801	3.63524	1.86205	insig
MW0050206	1-Linoleoyl-3-docosahexaenoyl-sn-glycerol	GL	DG	C44H70O5	3	0.6296	-	1.02626e+08	1.0628e+08	9.90293e+07	1.12314e+08	1.09599e+08	1.06038e+08	1.11991	0.0750643	0.201638	0.938969	-0.0908513	insig
MW0000459	Tetrahydroharmine	Alkaloids	Alkaloids	C13H16N2O	3	0.6279	-	6718.71	2383.09	3316.55	471.88	920.7	1538.33	1.2348	0.131908	0.291854	4.23703	2.08305	up
MW0132007	3,4,5-trihydroxy-6-{[2-(4-hydroxyphenyl)-8-methoxy-4-oxo-3,4-dihydro-2H-1-benzopyran-7-yl]oxy}oxane-2-carboxylic acid	Organic acids	Organic acids	C22H22O11	3	0.6279	-	115483	105118	109156	119089	116125	121520	1.15841	0.0771682	0.205646	0.924379	-0.113444	insig
MW0012197	11-(3,4-Dimethyl-5-pentylfuran-2-yl)undec-10-enoic acid	FA	Others	C22H36O3	3	0.6273	-	170853	164831	166558	115185	105537	36239.8	1.0612	0.0806036	0.212397	1.95454	0.966829	insig
MW0141699	1-Caffeoyl-beta-D-glucose	Phenolic acids	Phenolic acids	C15H18O9	3	0.627	-	64679.6	13125.9	16749.1	28618.1	23501.1	28889.6	0.150727	0.811792	0.889652	1.16721	0.223068	insig
MW0135079	6-(5-{8-[1-(2,4-dihydroxyphenyl)-2-hydroxy-3-(3-hydroxyphenyl)propyl]-3,5,7-trihydroxy-3,4-dihydro-2H-1-benzopyran-2-yl}-2-hydroxyphenoxy)-3,4,5-trihydroxyoxane-2-carboxylic acid	Organic acids	Organic acids	C36H36O16	3	0.627	-	480.75	609.64	486.03	187.32	430.98	664.65	0.574665	0.557483	0.704852	1.22875	0.297187	insig
MW0129952	2-(1,2-dihydroxypropan-2-yl)-6-(2-methylbut-3-en-2-yl)-2H,3H,7H-furo[3,2-g]chromen-7-one	Others	Ketone compounds	C19H22O5	3	0.6262	-	1485.11	16796.1	285.8	1769.08	609.82	1646.82	0.269884	0.458172	0.627973	4.6121	2.20543	insig
MW0049802	1,2-Dipalmitoyl-sn-glycerol	GL	DG	C35H68O5	3	0.6258	-	830545	1.446e+06	685759	1431931	634349	1.10659e+06	0.146353	0.841267	0.905808	0.933634	-0.0990705	insig
MW0106383	4-(Isopropylamino)-2-(2-pyridyl)-2-phenylbutyramide	Alcohol and amines	Amines	C18H23N3O	3	0.6253	-	250387	245459	253550	334630	312180	304756	1.41587	0.0128623	0.0639716	0.78754	-0.344575	insig
MW0137186	8-C-Ascorbylepigallocatechin 3-gallate	Flavonoids	Flavones	C28H24O17	3	0.6246	-	2637.8	2155.41	1466.03	11284.2	11195.6	7114.95	1.39933	0.0243696	0.0964815	0.211498	-2.24128	down
MW0134931	6-(3-{8-[1-(2,4-dihydroxyphenyl)-2-hydroxy-3-(3-hydroxyphenyl)propyl]-3,5,7-trihydroxy-3,4-dihydro-2H-1-benzopyran-2-yl}phenoxy)-3,4,5-trihydroxyoxane-2-carboxylic acid	Organic acids	Organic acids	C36H36O15	3	0.6245	-	910.87	2142.14	2399.02	4512.93	3749.73	990.21	0.512091	0.363672	0.550835	0.589226	-0.763107	insig
MW0137885	Dehydrocarpaine II	Heterocyclic compounds	Heterocyclic compounds	C28H46N2O4	3	0.6239	-	72668.8	69694.6	65301	73788.9	57703.7	62070.1	0.622623	0.442232	0.614431	1.07285	0.101453	insig
MW0137370	Flavone base + 3O, O-HexA-FeruloylHexA	Flavonoids	Flavones	C37H34O20	3	0.6235	-	11848.5	5946.23	12002.4	45123.9	27634.5	44228.3	1.35226	0.0258379	0.0995894	0.254705	-1.9731	down
MW0056864	PC(15:0/20:4(5Z,8Z,11Z,14Z))	GP	PC	C43H78NO8P	3	0.6228	-	2514.75	1773.55	2047.02	7218.55	19654.6	7442.17	1.33817	0.150866	0.317813	0.184621	-2.43736	down
MW0130081	2-(2-hydroxy-3,4-dimethoxyphenyl)-1-(2,4,6-trihydroxyphenyl)propan-1-one	Others	Ketone compounds	C17H18O7	3	0.6227	-	3462.18	1764	4376.97	9783.15	2745.29	7810.09	0.852221	0.223785	0.407543	0.472165	-1.08264	insig
MW0049590	1-(9Z-tetradecenoyl)-2-(9Z-hexadecenoyl)-sn-glycerol	GL	DG	C33H60O5	3	0.6227	-	142503	139775	129551	192606	191556	186539	1.43382	0.00151466	0.0177182	0.72162	-0.470689	insig
MW0142009	2,3-dihydroxy-3-methylvalerate	Organic acids	Organic acids	C6H12O4	3	0.6223	-	106808	108251	101742	104238	101240	102394	0.824751	0.269254	0.458496	1.029	0.0412379	insig
MW0056904	1-hexadecanoyl-2-(4Z,7Z,10Z,13Z,16Z-docosapentaenoyl)-sn-glycero-3-phosphocholine	GP	PC	C46H82NO8P	3	0.6213	-	5395.5	6366.09	4518.78	2188.86	4000.92	3008.78	1.2075	0.0342955	0.120148	1.76988	0.823654	insig
MW0128474	[(5,6,12,13,14-pentahydroxy-9-oxo-11-{6,7,13,14-tetrahydroxy-3,10-dioxo-2,9-dioxatetracyclo[6.6.2.0,(1).0(1)(1),(1)]hexadeca-1(15),4,6,8(16),11,13-hexaen-5-yl}-3,8-dioxatricyclo[8.4.0.0(2),]tetradeca-1(14),10,12-trien-4-yl)methoxy]sulfonic acid	Organic acids	Organic acids	C27H18O20S	3	0.6171	-	461359	372463	165214	445243	399391	497640	0.744475	0.321654	0.508791	0.744286	-0.426072	insig
MW0132364	3,4,5-trihydroxy-6-{2-hydroxy-4-[3-oxo-3-(2,4,6-trihydroxyphenyl)prop-1-en-1-yl]phenoxy}oxane-2-carboxylic acid	Benzene and substituted derivatives	Benzene and substituted derivatives	C21H20O12	3	0.6171	-	64880.6	58183.9	59635.6	57281.3	56491.8	57676.1	0.994584	0.20375	0.387327	1.06562	0.0916967	insig
MW0113606	6-{[1-(2-{[3-(3,4-dimethoxyphenyl)-1-hydroxyprop-2-en-1-ylidene]amino}ethyl)-3-methoxy-4-oxocyclohexa-2,5-dien-1-yl]oxy}-3,4,5-trihydroxyoxane-2-carboxylic acid	Organic acids	Organic acids	C26H31NO12	3	0.6162	-	58.92	43.59	192.11	1069.38	339.1	653.73	1.28058	0.101922	0.247263	0.142866	-2.80726	down
MW0051656	[(2S)-3-hydroxy-2-(10-methylundecanoyloxy)propyl] 10-methylundecanoate	GL	DG	C27H52O5	3	0.616	-	52998	40934.2	38596.5	44687.4	16151.3	46724	0.566141	0.502143	0.661431	1.23211	0.301125	insig
MW0136347	6-{4-[(2,4-dihydroxy-3-oxo-6-{[3,4,5-trihydroxy-6-(hydroxymethyl)oxan-2-yl]oxy}-2,3-dihydro-1-benzofuran-2-yl)methyl]phenoxy}-3,4,5-trihydroxyoxane-2-carboxylic acid	Organic acids	Organic acids	C27H30O17	3	0.6159	-	246881	205863	263488	349652	367193	347121	1.36442	0.0128673	0.0639716	0.673172	-0.570953	insig
MEDL02594	Citromitin	Flavonoids	Flavanones	C21H24O8	3	0.6154	-	22047.2	24474.5	23990.7	11895.8	11296.8	13510.8	1.43344	0.00036999	0.00898675	1.92115	0.941968	insig
MW0130295	2-(4-Methoxyphenyl)-1-(2,4,5-trihydroxyphenyl)propan-1-one	Others	Ketone compounds	C16H16O5	3	0.615	-	132.01	95.8	3111.75	215.53	160.04	234.2	0.335311	0.458668	0.628098	5.47675	2.45332	insig
MW0135449	6-[3-(3-{[3,4-dihydroxy-5-(hydroxymethyl)oxolan-2-yl]oxy}-5,7-dihydroxy-4-oxo-3,4-dihydro-2H-1-benzopyran-2-yl)phenoxy]-3,4,5-trihydroxyoxane-2-carboxylic acid	Organic acids	Organic acids	C26H28O16	3	0.6149	-	3.83617e+06	3.74617e+06	3.70483e+06	4.0865e+06	3.9929e+06	3.83189e+06	1.13906	0.0888298	0.225969	0.947602	-0.0776467	insig
MW0059274	PE-NMe(14:1(9Z)/18:4(6Z,9Z,12Z,15Z))	GP	PE	C38H66NO8P	3	0.6145	-	9297.05	14328.6	10087.4	4130.75	7615.37	7713.97	1.10644	0.0769529	0.205208	1.73242	0.79279	insig
MW0110244	Tyr-Cys	Amino acids and derivatives	Amino acids and derivatives	C12H16N2O4S	3	0.6131	-	56989.1	60085.6	57966.2	45289.1	49163.8	44830.1	1.40149	0.00327384	0.0275003	1.25673	0.329672	insig
MW0128584	[2,6-dihydroxy-3-(7-hydroxy-4-oxo-4H-chromen-2-yl)phenyl]oxidanesulfonic acid	Organic acids	Organic acids	C15H10O9S	3	0.6119	-	3.15473e+06	3.15658e+06	3.0205e+06	3.30967e+06	3.24464e+06	3.49991e+06	1.18032	0.0673593	0.185819	0.928149	-0.107571	insig
MW0135078	6-(5-{8,8-dimethyl-2-oxo-2H,8H-pyrano[2,3-f]chromen-3-yl}-4-hydroxy-2-methoxyphenoxy)-3,4,5-trihydroxyoxane-2-carboxylic acid	Organic acids	Organic acids	C27H26O12	3	0.607	-	200941	227980	229109	367948	294185	336039	1.36553	0.0206623	0.0862498	0.659235	-0.601135	insig
MW0135262	6-[(2-benzyl-2,4,5-trihydroxy-3-oxo-2,3-dihydro-1-benzofuran-6-yl)oxy]-3,4,5-trihydroxyoxane-2-carboxylic acid	Organic acids	Organic acids	C21H20O12	3	0.6064	-	5749.38	2764.51	197.59	3663.32	7412.17	5481.06	0.765143	0.257143	0.444788	0.526165	-0.926412	insig
MW0130528	2-[1-hydroxy-3-(4-hydroxyphenyl)propyl]-3,5-dimethoxyphenol	Benzene and substituted derivatives	Benzene and substituted derivatives	C17H20O5	3	0.6045	-	2.52895e+06	1.30464e+06	2.34147e+06	3.30116e+06	2.7936e+06	2.81742e+06	0.997186	0.124249	0.282049	0.69288	-0.529323	insig
MEDP1139	(9E,12E)-N-(2-Hydroxyethyl)octadeca-9,12-dienamide	Alcohol and amines	Amines	C20H37NO2	3	0.6039	-	34162.3	9989.64	15659.8	176407	108719	91589.7	1.34326	0.0463752	0.143912	0.158772	-2.65498	down
MW0004227	4-(2,4-dihydroxy-5-methoxyphenyl)butan-2-one	Phenolic acids	Phenolic acids	C11H14O4	3	0.6032	-	38543.7	36134.8	31444.6	147069	141156	145912	1.45344	2.96849e-06	0.000797929	0.244446	-2.03241	down
MW0113715	cis-Ferulic acid 4-glucuronide	Organic acids	Organic acids	C16H18O10	3	0.603	-	1.32246e+06	1.37315e+06	1.26932e+06	1.56413e+06	1.64507e+06	1.5843e+06	1.40228	0.00236114	0.0228038	0.827145	-0.273787	insig
MEDP1398	Carnitine C16:1	FA	CAR	C23H43NO4	3	0.6027	-	92.18	702.58	451.78	197.01	668.75	369.57	0.17332	0.987559	0.993603	1.00907	0.0130327	insig
MW0000248	(6aR,9R,10aR)-N-[(1S,2S,4R,7S)-2-hydroxy-7-methyl-5,8-dioxo-4-propan-2-yl-3-oxa-6,9-diazatricyclo[7.3.0.02,6]dodecan-4-yl]-7-methyl-6,6a,8,9,10,10a-hexahydro-4H-indolo[4,3-fg]quinoline-9-carboxamide	Alkaloids	Alkaloids	C29H37N5O5	3	0.6011	-	213333	256826	277786	143017	220310	270770	0.624205	0.43052	0.603567	1.17954	0.238228	insig
FDATN00327	Manidipine	Benzene and substituted derivatives	Benzene and substituted derivatives	C35H38N4O6	3	0.6002	-	528.09	773.94	68.38	617.25	251.89	693.36	0.386356	0.810597	0.88934	0.877062	-0.189249	insig
MW0108562	Phenylbutyrylglutamine	Alcohol and amines	Amines	C15H20N2O4	3	0.5957	-	53174.2	50179.1	47639.1	94247.2	91251.8	86235.8	1.44493	0.000302004	0.00816501	0.555661	-0.847724	insig
MW0112645	3,4,5-trihydroxy-6-[2-hydroxy-4-[(E)-3-oxo-3-[(3,4,5,6-tetrahydroxyoxan-2-yl)methoxy]prop-1-enyl]phenoxy]oxane-2-carboxylic acid	Organic acids	Organic acids	C21H26O15	3	0.5955	-	279.24	231.94	76.78	102.29	162.14	162.2	0.337145	0.477536	0.642982	1.37815	0.462733	insig
MW0135751	6-{[2-(2,4-dihydroxyphenyl)-7-methoxy-6-(3-methylbut-1-en-1-yl)-3-(3-methylbut-2-en-1-yl)-4-oxo-4H-chromen-5-yl]oxy}-3,4,5-trihydroxyoxane-2-carboxylic acid	Benzene and substituted derivatives	Benzene and substituted derivatives	C32H36O12	3	0.5948	-	1378.18	1494.14	6726.35	3248.12	1922.29	3331.54	0.179936	0.857553	0.918292	1.129	0.175041	insig
MW0131816	3,4,5-trihydroxy-6-[2-hydroxy-2-(9-{[(2E)-2-methylbut-2-enoyl]oxy}-2-oxo-2H,8H,9H-furo[2,3-h]chromen-8-yl)propoxy]oxane-2-carboxylic acid	Organic acids	Organic acids	C25H28O13	3	0.5902	-	8964.05	7185.61	7530.33	6495.32	6301.44	5209.95	1.19317	0.0538807	0.160567	1.31506	0.395134	insig
MW0131956	3,4,5-trihydroxy-6-[5-methoxy-2-(4,5,7-trihydroxy-3,4-dihydro-2H-1-benzopyran-3-yl)phenoxy]oxane-2-carboxylic acid	Organic acids	Organic acids	C22H24O12	3	0.5889	-	13883.1	22607.3	22136.8	41245.9	38128	35149.4	1.3156	0.00842825	0.0499746	0.511923	-0.966001	insig
MW0127779	1,7-Bis(4-hydroxyphenyl)-5-hydroxy-1-heptene-3-one	Others	Ketone compounds	C19H20O4	3	0.5869	-	15951.8	16236.9	22019.5	11756.7	23249.2	27509.2	0.237086	0.629145	0.761776	0.867121	-0.205696	insig
MEDP0780	Octylamine	Alkaloids	Alkaloids	C8H19N	3	0.5847	-	12351.4	5838.31	9696.21	1817.71	12614.9	196.38	0.826457	0.3853	0.570941	1.90621	0.930708	insig
MEDP1156	(2S)-3-hydroxypropane-1,2-diyl didecanoate	GL	DG	C23H44O5	3	0.5845	-	58163.1	64429.8	63783.5	79412.9	83772.4	72320.5	1.32438	0.0206304	0.0862498	0.791388	-0.337543	insig
MW0130274	CID 74977408	Others	Ketone compounds	C22H22O10	3	0.5805	-	543009	526852	523696	787518	794668	773076	1.45531	8.57152e-06	0.00153697	0.676594	-0.563637	insig
MW0104538	2-amino-4-({1-[(carboxymethyl)-C-hydroxycarbonimidoyl]-2-[(1-hydroxy-5-oxo-1,7-diphenylheptan-2-yl)sulfanyl]ethyl}-C-hydroxycarbonimidoyl)butanoic acid	Organic acids	Organic acids	C29H37N3O8S	3	0.5805	-	5339.61	5516.64	8635.79	60.19	3075.8	1706.78	0.977558	0.0257246	0.0995894	4.02498	2.00898	insig
MW0130269	2-(4-hydroxy-3,5-dimethoxyphenyl)-4H-chromen-4-one	Others	Ketone compounds	C17H14O5	3	0.5797	-	86637.2	89053.5	78808.5	393332	433865	478033	1.454	0.00432851	0.0331798	0.194984	-2.35857	down
MW0112545	3,4,5-Trihydroxy-6-(5-hydroxy-2-methoxy-4-prop-2-enylphenoxy)oxane-2-carboxylic acid	Organic acids	Organic acids	C16H20O9	3	0.5795	-	272.43	462.42	292.8	915.15	1078.29	1253.9	1.3884	0.00550545	0.0384048	0.316459	-1.65991	down
MW0152600	Leu-Gln	Amino acids and derivatives	Amino acids and derivatives	C11H21N3O4	3	0.5794	-	3597.77	169.12	5292.85	927.03	4408.2	1986.26	0.189475	0.768796	0.860333	1.23742	0.307332	insig
MW0131715	3,4,5-Trihydroxy-6-[[3,4,5-trihydroxy-6-[[2-(2-hydroxypropan-2-yl)-7-oxo-2,3-dihydrouro[3,2-g]chromen-9-yl]oxy]oxan-2-yl]methoxy]oxane-2-carboxylic acid	Organic acids	Organic acids	C26H32O16	3	0.5787	-	3050.23	4591.16	2357.27	11194.5	11122.5	8476.75	1.36748	0.00442186	0.0335796	0.324697	-1.62283	down
MW0131727	3,4,5-trihydroxy-6-[(3-oxo-1,7-diphenylhept-4-en-2-yl)oxy]oxane-2-carboxylic acid	Benzene and substituted derivatives	Benzene and substituted derivatives	C25H28O8	3	0.5785	-	701487	1.00031e+06	1.23135e+06	1.49e+06	1.51962e+06	1.49747e+06	1.18333	0.0753806	0.202059	0.650786	-0.619746	insig
MW0121652	5-methyltetrahydropteroyltri-L-glutamate	Amino acids and derivatives	Amino acids and derivatives	C30H39N9O12	3	0.5771	-	519367	463152	540481	455483	424133	491590	0.93318	0.171214	0.34589	1.1107	0.151471	insig
MW0055560	PA(14:0/22:4(7Z,10Z,13Z,16Z))	GP	PA	C39H69O8P	3	0.5749	-	5424.5	5042.39	13535.8	11086.4	7729.78	7460.86	0.375555	0.818871	0.893072	0.913446	-0.130608	insig
MEDL02619	[(3S,4R,5S)-5-[(2S,3R,4S,5S,6R)-2-[4-[(E)-3-(2,4-dihydroxyphenyl)-3-oxoprop-1-enyl]phenoxy]-4,5-dihydroxy-6-(hydroxymethyl)oxan-3-yl]oxy-3,4-dihydroxyoxolan-3-yl]methyl (E)-3-(4-hydroxyphenyl)prop-2-enoate	Flavonoids	Dihydroisoflavones	C35H36O15	3	0.5721	-	2670.28	14415.3	12912.8	9632.78	6723.99	11382.2	0.168106	0.862407	0.921119	1.08146	0.112974	insig
MW0139429	(2,6-diamino-10,10-dihydroxy-5-oxido-9-sulooxy-3a,4,8,9-tetrahydro-1H-pyrrolo[1,2-c]purin-5-ium-4-yl)methoxycarbonylsulamic acid	Heterocyclic compounds	Heterocyclic compounds	C10H17N7O12S2	3	0.5714	-	3368.82	6817.76	8373.75	303.67	1693.61	4271.08	0.979746	0.0987242	0.241193	2.96095	1.56606	insig
MW0013811	3,4,5-trihydroxy-6-{1-methoxy-1,3-dioxo-3-[(3,4,5,6-tetrahydroxyoxan-2-yl)methoxy]propan-2-yl}oxane-2-carboxylic acid	Organic acids	Organic acids	C16H24O15	3	0.5695	-	45393.2	40978.8	45634.6	67532.1	65609.2	62355.3	1.4267	0.00058497	0.011336	0.675237	-0.566534	insig
MW0013478	2-Hexaprenyl-6-methoxy-1,4-benzoquinone	Benzene and substituted derivatives	Benzene and substituted derivatives	C37H54O3	3	0.5686	-	3.57403e+06	3.44468e+06	3.43734e+06	4.28387e+06	3.99297e+06	3.84814e+06	1.32504	0.0375796	0.127329	0.862356	-0.213644	insig
MW0056798	PC(14:0/20:4(5Z,8Z,11Z,14Z))	GP	PC	C42H76NO8P	3	0.5673	-	2564.4	3102.94	3490.1	774.2	4817.38	1836.25	0.582255	0.683943	0.797745	1.23286	0.302004	insig
MW0104092	3,6,11,12-Tetrakis(acetyloxy)-5-(4-hydroxyphenyl)-8-oxatricyclo[7.4.0.0^{2,7}]trideca-1(13),2,4,6,9,11-hexaen-4-yl acetate	Organic acids	Organic acids	C28H22O12	3	0.5638	-	84008.7	71008	54385.8	83977.2	86663.9	82772.6	0.918236	0.227615	0.412831	0.826326	-0.275216	insig
MW0011128	(3alpha,5alpha,22R,23R)-Cholestane-3,22,23-triol	Alcohol and amines	Alcohols	C27H48O3	3	0.5635	-	71394	89778.9	101917	77777.4	81339.3	113229	0.141516	0.840768	0.905808	0.966015	-0.0498832	insig
MW0112447	3,4,5-trihydroxy-6-[1-(4-methoxyphenyl)-3-oxopropoxy]oxane-2-carboxylic acid	Organic acids	Organic acids	C16H20O9	3	0.5598	-	177.26	1222.19	1525.61	35.25	819.41	982.76	0.444373	0.514232	0.671139	1.59194	0.670785	insig
MW0054499	LysoPA(21:0/0:0)	GP	LPA	C24H49O7P	3	0.5594	-	231.47	187.27	230.14	184.17	137.54	154.07	1.1939	0.0445102	0.140687	1.36382	0.447657	insig
MW0005123	4-Hydroxypropranolol	Benzene and substituted derivatives	Benzene and substituted derivatives	C16H21NO3	3	0.5575	-	252783	149891	258656	355951	337556	339273	1.1654	0.0689003	0.189112	0.64034	-0.643091	insig
MW0134314	Viniferin	Benzene and substituted derivatives	Benzene and substituted derivatives	C28H22O6	3	0.5523	-	376181	379116	381921	269545	286399	278802	1.44903	0.000926087	0.013881	1.36235	0.446101	insig
MEDP2118	2,3-Bis(4-hydroxyphenyl)propionitrile	Benzene and substituted derivatives	Benzene and substituted derivatives	C15H13NO2	3	0.5514	-	29615.3	23657.3	42082.4	36172.4	39110.7	36458.4	0.703545	0.420843	0.59601	0.853354	-0.228784	insig
MW0135201	6,8-bis[2-(3,4-dihydroxyphenyl)-3,7-dihydroxy-3,4-dihydro-2H-1-benzopyran-4-yl]-2-(4-hydroxy-3-methoxyphenyl)-3,4-dihydro-2H-1-benzopyran-3,5,7-triol	Benzene and substituted derivatives	Benzene and substituted derivatives	C46H40O16	3	0.5497	-	37097.9	27672	54276.7	22740.4	36184.6	45210.9	0.339501	0.651125	0.777647	1.14319	0.193059	insig
MW0139337	Phenyl 2,5-dihydroxybenzoate	Benzene and substituted derivatives	Benzene and substituted derivatives	C13H10O4	3	0.5489	-	166559	95985.3	73738.1	131693	126720	129029	0.562256	0.604382	0.743627	0.867959	-0.204302	insig
MW0000672	(3E)-4-phenylbuta-1,3-dien-2-ol	Benzene and substituted derivatives	Benzene and substituted derivatives	C10H10O	3	0.5483	-	3743.49	12267.5	5046.1	7807.37	3198.56	6777.8	0.168488	0.73968	0.839391	1.18406	0.243745	insig
MEDP2158	6-Amino-4-(4-phenoxyphenylethylamino)quinazoline	Benzene and substituted derivatives	Benzene and substituted derivatives	C22H20N4O	3	0.5425	-	18061	12075.7	17457.3	9819.78	9239.23	11108.2	1.23372	0.0826179	0.216028	1.57767	0.657796	insig
MW0127902	(2E)-1-{3-[(3,3-dimethyloxiran-2-yl)methyl]-2,4,6-trihydroxyphenyl}-3-phenylprop-2-en-1-one	Others	Ketone compounds	C20H20O5	3	0.5399	-	1.0743e+06	1.06276e+06	1.1105e+06	1.18812e+06	1.13317e+06	1.11246e+06	1.11091	0.0930252	0.23285	0.945777	-0.0804285	insig
MW0013768	3,4,5-trihydroxy-6-[1-(7-methoxy-2-oxo-2H-chromen-6-yl)-3-oxobutoxy]oxane-2-carboxylic acid	Organic acids	Organic acids	C20H22O11	3	0.5395	-	7811.01	9071.96	11928.8	10868.8	6896.75	9462.14	0.230368	0.769554	0.860333	1.05818	0.0815862	insig
MW0055952	PA(20:2(11Z,14Z)/14:1(9Z))	GP	PA	C37H67O8P	3	0.5328	-	66172.5	61875.5	61316.1	11348.3	2909.64	2345.14	1.36983	0.000382822	0.00910756	11.4054	3.51164	up
MW0104287	1-Nitro-5-hydroxy-6-glutathionyl-5,6-dihydronaphthalene	Organic acids	Organic acids	C20H24N4O9S	3	0.5322	-	137718	135006	116043	116539	118970	155708	0.00113286	0.958232	0.977135	0.993737	-0.00906333	insig
MW0135499	6-[3,7-dihydroxy-2-(4-hydroxy-3-methoxyphenyl)-3,4-dihydro-2H-1-benzopyran-4-yl]-2-(3,4-dihydroxyphenyl)-8-[2-(3,4-dihydroxyphenyl)-3,7-dihydroxy-3,4-dihydro-2H-1-benzopyran-4-yl]-3,4-dihydro-2H-1-benzopyran-3,5,7-triol	Benzene and substituted derivatives	Benzene and substituted derivatives	C46H40O16	3	0.5312	-	263616	235930	265707	232962	196788	206549	1.20628	0.0416841	0.136089	1.20266	0.266231	insig
MW0135989	6-{[4,5-dihydroxy-6-({7-oxo-7H-furo[3,2-g]chromen-9-yl}oxy)oxan-3-yl]oxy}-3,4,5-trihydroxyoxane-2-carboxylic acid	Organic acids	Organic acids	C22H22O14	3	0.5259	-	2794.87	18658.5	32195.7	398.17	937.56	302.47	1.29998	0.178027	0.354472	32.7488	5.03337	up
MW0055554	PA(14:0/20:4(5Z,8Z,11Z,14Z))	GP	PA	C37H65O8P	3	0.5189	-	989.84	6719.42	6806.07	19327	7547.48	10122.5	0.932991	0.160063	0.330733	0.392338	-1.34983	insig
MW0006803	Didox	Benzene and substituted derivatives	Benzene and substituted derivatives	C7H7NO4	3	0.5179	-	11972.9	10330	2475.37	22430.3	24641.9	19331.5	1.1075	0.0243489	0.0964815	0.373145	-1.42219	down
MW0138907	5,7-dihydroxy-2-(4-hydroxy-3-methoxyphenyl)-6-[(2R,3S,4S,6S)-4-hydroxy-6-methyl-5-oxo-3-[(2S,3R,4R,5R,6S)-3,4,5-trihydroxy-6-methyloxan-2-yl]oxyoxan-2-yl]chromen-4-one	Flavonoids	Flavones	C28H30O14	3	0.5161	-	418	204.36	831.58	1221.04	174.94	801.07	0.292361	0.531778	0.685682	0.661769	-0.5956	insig
MW0110116	Trp-His	Amino acids and derivatives	Amino acids and derivatives	C17H19N5O3	3	0.5094	-	2566.06	262.11	3036.64	262.11	90.16	1104.34	0.818204	0.222446	0.407034	4.02634	2.00947	insig
MEDL01869	Methylgingerol	Phenolic acids	Phenolic acids	C18H28O4	3	0.5753	61914-52-1	64151.3	22180.9	53815.2	149103	107363	104767	1.20866	0.0188159	0.0817651	0.387969	-1.36599	down
MEDL00404	2-Palmitoyl-rac-glycerol	GL	DG	C19H38O4	2	0.9302	-	25569.3	22858.7	32363.3	7156.88	22923.9	25702.2	0.744812	0.28813	0.477602	1.44831	0.534374	insig
MW0137198	8-hydroxy-2-phenyl-1lambdachromen-1-ylium	Flavonoids	Flavones	C15H11O2	3	0.7127	-	463.82	302.04	504.32	294.99	261.9	827.76	0.0608076	0.858862	0.918995	0.917329	-0.124488	insig
MW0136928	7-{4-[(6-carboxy-3,4,5-trihydroxyoxan-2-yl)oxy]-3,5-dimethoxyphenyl}-6,11-dihydroxy-3-(4-hydroxyphenyl)-2lambda8-dioxatricyclo[7.3.1.0,(1)(3)]trideca-1(13),2,4,6,9,11-hexaen-2-ylium	Flavonoids	Flavonoid	C31H27O14	3	0.5119	-	36185.6	39235	38268.5	54605.5	51288.2	92861.3	1.17977	0.166853	0.339944	0.572006	-0.805897	insig
MW0139773	Syringetin-3-o-glucoside	Flavonoids	Flavonols	C23H24O13	2	0.9502	40039-49-4	385756	479837	448061	495369	477835	485969	0.935238	0.218433	0.402709	0.900273	-0.151565	insig
MW0137617	Catechol, pentaacetate, (+)-	Flavonoids	Flavones	C25H24O11	2	0.934	84282-42-8 | 16198-01-9 | 20194-41-6	66584.4	57087.8	54423	221624	136193	121849	1.35289	0.082072	0.214879	0.37129	-1.42938	down
MW0015867	Arachidonoyl-N,N-dimethyl amide	FA	Others	C22H37NO	2	0.9324	45280-17-9	8531.6	10169.4	10638.1	8430.16	10637.1	13964.4	0.440443	0.535087	0.688848	0.888213	-0.171022	insig
MEDN1428	5Z,8Z,11Z,14Z-Eicosatetraenedioic acid	Lipids	Free fatty acids	C20H30O4	2	0.9306	79551-84-1	38672.3	34962.4	36959.5	204789	193800	226122	1.45613	0.00275772	0.0250431	0.177033	-2.49791	down
MW0124765	Marrubiin	Others	Lactones	C20H28O4	2	0.9223	465-92-9	4768.13	4484	3659.76	176959	170219	170030	1.45753	0.000137857	0.0054494	0.0249647	-5.32397	down
MW0110760	2S-Amino-4E-pentadecene-1,3R-diol	Alcohol and amines	Alcohols	C15H31NO2	2	0.9185	86555-28-4	63418	45837.9	62702.7	7082.28	16175.3	15325.4	1.36764	0.00650925	0.0423995	4.45685	2.15602	up
MW0063496	Secologanin	Terpenoids	Monoterpenoids	C17H24O10	2	0.9173	19351-63-4	11601.9	9078.68	2750.32	2724.31	2644.54	5326.84	0.815526	0.243509	0.429471	2.19069	1.13138	insig
MW0138966	Milldurone	Others	Ketone compounds	C19H16O7	2	0.9146	24195-15-1	122.12	135.31	237.72	200.6	228.72	88.32	0.0211434	0.900724	0.945514	0.956553	-0.0640835	insig
MW0124614	Kahweol	Heterocyclic compounds	Heterocyclic compounds	C20H26O3	2	0.9083	6894-43-5	122.47	500.79	275.08	55750.4	30365.8	45472.2	1.43725	0.02744	0.102823	0.00682689	-7.19455	down
MW0143978	7-Keto-dehydroepiandrosterone	Others	Ketone compounds	C19H26O3	2	0.9023	566-19-8	43519.1	40830.9	43200	548507	526462	520197	1.45864	0.000272444	0.00779073	0.0799603	-3.64457	down
MW0012936	1-Oleoyl-2-acetyl-sn-glycerol	GL	DG	C23H42O5	2	0.9006	86390-77-4 | 92282-11-6	4800.83	2641.31	6732.65	2110.84	3464.17	4958.48	0.526094	0.451957	0.62258	1.34569	0.428344	insig
MW0012592	17R-hydroxy-4Z,7Z,10Z,13Z,15E,19Z-docosahexaenoic acid	Lipids	Free fatty acids	C22H32O3	2	0.9001	155976-53-7	406.02	70.34	283.92	607.53	65.48	854.3	0.349631	0.394027	0.578347	0.49779	-1.00639	insig
Lmhp001461	Pro-leu	Amino acids and derivatives	Amino acids and derivatives	C11H20N2O3	2	0.8968	52899-07-7	228374	304732	264850	139178	141300	219455	1.19153	0.0464003	0.143912	1.59612	0.67457	insig
MW0005288	4-Nitroso-N-phenylaniline	Benzene and substituted derivatives	Benzene and substituted derivatives	C12H10N2O	2	0.8922	156-10-5	26615.7	27782.4	25033.6	19763.1	22127.9	23648.8	1.23803	0.0336651	0.118548	1.21196	0.277343	insig
MW0014589	(+/-)5,6-EET Methyl Ester	Lipids	Free fatty acids	C21H34O3	2	0.8921	122799-12-6	1.14801e+06	1.93574e+06	839629	1.48112e+06	1.91992e+06	445475	0.182536	0.964962	0.981021	1.01998	0.0285443	insig
MW0052783	Eurycomalactone	Others	Ketone compounds	C19H24O6	2	0.8921	23062-24-0	2386.51	5403.9	6843.74	35140.5	24943.5	36087.7	1.37813	0.0096625	0.05411	0.152167	-2.71628	down
MW0154727	Oleic Acid-2,6-diisopropylanilide	Benzene and substituted derivatives	Benzene and substituted derivatives	C30H51NO	2	0.8906	140112-65-8	645.56	256.8	4191.04	724.12	613.44	1140.9	0.0906918	0.559139	0.705839	2.05507	1.03919	insig
MW0000423	Anaprel	Alkaloids	Alkaloids	C35H42N2O9	2	0.8889	24815-24-5	104.99	67.79	157.17	439.14	701.47	1219.05	1.35739	0.0962729	0.237414	0.139829	-2.83826	down
MW0108782	N-Formyl-Met-Leu-Phe	Amino acids and derivatives	Amino acids and derivatives	C21H31N3O5S	2	0.8857	59880-97-6	9821.93	12957.6	11217.7	19007.4	11234	16847.8	0.954235	0.191644	0.371673	0.721976	-0.469977	insig
MW0012822	Azelaoyl PAF	GP	PA	C33H66NO9P	2	0.8789	354583-69-0	7874.66	2493.31	1759.57	2046.01	7666.95	298.01	0.442851	0.822515	0.895352	1.21143	0.276705	insig
MW0114516	Gentiobiose	Others	Saccharides	C12H22O11	2	0.8789	5996-00-9	1.43397e+06	925710	1.55609e+06	1.91938e+06	1.90932e+06	1.75101e+06	1.10199	0.0932736	0.233146	0.701788	-0.510892	insig
MW0001514	Red Violet 2RN Acid Anthraquinone	Benzene and substituted derivatives	Benzene and substituted derivatives	C21H13NO4	2	0.8776	81-79-8	19329.5	18284.8	24718.4	22134.3	23690.6	21597.7	0.596231	0.489746	0.652686	0.924508	-0.113242	insig
MW0015643	Alloxanthin	Alcohol and amines	Alcohols	C40H52O2	2	0.8743	28380-31-6	26065.5	15365.3	22456.1	95514.7	25330.9	26719.5	0.846283	0.351472	0.537725	0.43294	-1.20776	insig
MW0056744	Palmitoyl 3-carbacyclic Phosphatidic Acid	Lipids	Free fatty acids	C20H39O5P	2	0.8731	476310-22-2	68402.2	78369.4	76809	144759	141152	146591	1.4463	0.000276336	0.0078464	0.516949	-0.951907	insig
MW0139901	7-Hydroxycoumarinyl Arachidonate	Others	Others	C29H36O4	2	0.8727	161180-11-6	65995	52644.3	46922.8	41253.8	40650.5	42677.4	1.17419	0.135317	0.295879	1.32894	0.410281	insig
MW0110215	Tyrosyl-prolyl-arginine	Amino acids and derivatives	Amino acids and derivatives	C20H30N6O5	2	0.8669	117186-48-8	11162.2	9803.23	10884.6	6510.28	8729.57	6600.72	1.28486	0.0251932	0.0979548	1.4583	0.544286	insig
MW0139445	Psoromic acid	Organic acids	Organic acids	C18H14O8	2	0.8652	7299-11-8	95.18	2493.07	2080.84	11005.8	1910	13343.8	0.952176	0.170371	0.344847	0.177805	-2.49163	insig
MEDP1068	1,2-Dioctanoyl-sn-glycero-3-phosphocholine	GP	PC	C24H48NO8P	2	0.8651	19191-91-4	437.94	747.67	413.44	616.11	944.53	782.25	0.973775	0.15994	0.330733	0.682512	-0.551074	insig
MW0110317	Tyrosyl-Valine	Amino acids and derivatives	Amino acids and derivatives	C14H20N2O4	2	0.865	17355-09-8	27550.7	22554.9	25596.6	68181.4	90072.5	85788.1	1.43643	0.0111234	0.058935	0.310202	-1.68872	down
MW0124445	Irisxanthone	Flavonoids	Other Flavonoids	C20H20O11	2	0.864	51419-56-8	278.35	1706.23	1805.83	18046.3	18370.8	21651.4	1.35006	0.00121286	0.0160647	0.0652748	-3.93733	down
MW0139651	Santin	Flavonoids	Flavones	C18H16O7	2	0.8638	27782-63-4	55002.6	50350.8	50209.9	39196.4	39941.1	28383.8	1.24882	0.0352436	0.121767	1.44681	0.532879	insig
MW0053624	Ginsenoside Rg3	Terpenoids	Triterpene Saponin	C42H72O13	2	0.8632	14197-60-5 | 11019-45-7	546.82	65	201.46	225.45	213.02	295.36	0.262316	0.871583	0.92748	1.10827	0.148306	insig
MW0014614	5S-HpEPE	Lipids	Free fatty acids	C20H30O4	2	0.8631	143292-98-2	23491.9	67521	35340.6	228642	205713	229826	1.37575	0.000892019	0.0136236	0.19024	-2.39411	down
MW0150783	1-O-Hexadecyl-2-acetyl-sn-glycerol	GL	DG	C21H42O4	2	0.8585	77133-35-8	15148.7	5690.58	3420.18	26367.6	18850.2	13481.5	1.07481	0.0912335	0.230196	0.413282	-1.2748	down
MW0055263	Neoabietic acid	Terpenoids	Ditepenoids	C20H30O2	2	0.8583	471-77-2	5.52834e+06	6.16232e+06	4.66211e+06	3.25009e+06	4.13683e+06	4.41798e+06	1.16454	0.0560396	0.164688	1.38525	0.47015	insig
MW0158729	Tyrosyl-tryptophan	Amino acids and derivatives	Amino acids and derivatives	C20H21N3O4	2	0.8461	60815-41-0	144.48	90.53	146.66	3131.54	915.02	1882.25	1.39923	0.102138	0.247562	0.0643755	-3.95734	down
MW0141380	13E-Docosenamide	FA	Others	C22H43NO	2	0.8431	3061-72-1	614200	320517	197354	2.27315e+06	1.87092e+06	962447	1.28352	0.0645802	0.181202	0.221691	-2.17338	down
MW0137583	Capillarisin	Others	Chromone	C16H12O7	2	0.8422	56365-38-9	64343.9	67664.6	65396.5	225458	196421	204684	1.45479	0.00328872	0.0275106	0.31506	-1.6663	down
MW0126958	Vulpinic acid	Organic acids	Organic acids	C19H14O5	2	0.842	521-52-8 | 73622-57-8	66.87	1276.3	666.01	1882.63	1061.87	538.37	0.660751	0.402511	0.584417	0.576875	-0.79367	insig
MW0109363	Prolylglutamic acid	Amino acids and derivatives	Amino acids and derivatives	C10H16N2O5	2	0.8387	67644-00-2	70960	93749.3	99563.3	130054	113896	110317	1.15611	0.0544992	0.161741	0.74597	-0.422811	insig
MW0143974	7-Hydroxycoumarinyl-gamma-linolenate	Lipids	Free fatty acids	C27H34O4	2	0.8364	161180-12-7	4994.06	7849.65	3769.64	2842.56	7708.07	4593.55	0.256152	0.806358	0.886378	1.09701	0.13358	insig
MW0148485	Isorescinnamine, dihydro-	Alkaloids	Alkaloids	C35H44N2O9	2	0.8363	6335-49-5	33556.3	33499.4	53055.1	57809.5	82991.2	65972.5	1.21326	0.043824	0.139572	0.580882	-0.783684	insig
MW0015475	9-Octadecynoic acid	Lipids	Free fatty acids	C18H32O2	2	0.8351	506-24-1	1228.16	2267.88	2399.63	12042.7	1726.39	4386.49	0.856316	0.316729	0.506037	0.32473	-1.62269	insig
MW0108426	N-(3-Indolylacetyl)-L-isoleucine	Amino acids and derivatives	Amino acids and derivatives	C16H20N2O3	2	0.8223	57105-45-0	23.69	377.44	171.33	661.15	821.11	727.72	1.08863	0.0198388	0.0844593	0.259034	-1.94879	down
MW0061828	Pinolenic Acid ethyl ester	FA	Others	C20H34O2	2	0.8157	493015-74-0	576781	536353	552997	855639	858987	845495	1.45165	0.000543082	0.0108941	0.650802	-0.619709	insig
MW0055282	Neotigogenin acetate	Steroids	Steroid	C29H46O4	2	0.8065	4948-43-0	257086	211381	178288	570923	606320	454561	1.39903	0.00820841	0.049344	0.396344	-1.33517	down
MW0009992	Triphenylphosphine oxide	Benzene and substituted derivatives	Benzene and substituted derivatives	C18H15OP	2	0.8048	791-28-6	31830.6	30881.5	30876.9	20047.9	34600.3	35034.6	0.287176	0.816421	0.892305	1.04356	0.0615069	insig
MW0015499	9-Thiastearic Acid	Lipids	Free fatty acids	C17H34O2S	2	0.8044	106689-24-1	728592	558781	512572	555611	459481	549273	0.694906	0.362542	0.549745	1.15059	0.202375	insig
MW0137752	Coumestrol dimethyl ether	Heterocyclic compounds	Heterocyclic compounds	C17H12O5	2	0.8011	3172-99-4	12.47	16.61	14.06	2288.87	2409.01	2242.46	1.45812	0.000462355	0.00985341	0.00621583	-7.32984	down
MW0004136	3-methyl-N-naphthalen-2-ylbutanamide	Benzene and substituted derivatives	Benzene and substituted derivatives	C15H17NO	2	0.7961	6286-27-7	5.14	102691	314.74	432820	418261	415040	1.10354	0.00657759	0.0427067	0.0813597	-3.61954	down
MW0113884	Aloeresin A	Flavonoids	Other Flavonoids	C28H28O11	2	0.7959	74545-79-2	72737.9	69710.5	62142.2	131624	129453	94156.2	1.33656	0.04619	0.143813	0.575934	-0.796023	insig
MW0004284	4-(3-Hydroxybutyl)phenol	Phenolic acids	Phenolic acids	C10H14O2	2	0.7947	69617-84-1	79339.2	78162	74419.2	58062.5	57326	34021.4	1.16347	0.0687573	0.188977	1.55224	0.634354	insig
MW0015797	Anisatin	Heterocyclic compounds	Heterocyclic compounds	C15H20O8	2	0.7935	5230-87-5	1554.88	2127.45	831.67	162.27	2299.37	646.43	0.650615	0.572614	0.718032	1.45235	0.538387	insig
MW0011974	10S,17S-dihydroxy-4Z,7Z,11E,13Z,15E,19Z-docosahexaenoic acid	Lipids	Free fatty acids	C22H32O4	2	0.7872	871826-47-0	90371.3	83442.6	307867	99321.7	94577.5	92360	0.527217	0.469933	0.636684	1.68267	0.750754	insig
MEDP2160	Oroxylin A	Flavonoids	Flavones	C16H12O5	2	0.7869	480-11-5	852206	842292	802262	856772	839290	787108	0.133009	0.870411	0.926967	1.00547	0.00787415	insig
MW0114164	D-(+)-Turanose	Others	Saccharides	C12H22O11	2	0.7866	547-25-1	1.82371e+07	2.01447e+07	1.60386e+07	1.61365e+07	1.49109e+07	1.43373e+07	1.11964	0.110598	0.260974	1.19909	0.261939	insig
MW0055246	Napelline	Alkaloids	Terpenoid alkaloids	C22H33NO3	2	0.7865	5008-52-6	6553.44	5408.03	11553.7	646551	598073	591396	1.45113	0.000729922	0.0126311	0.0128077	-6.28684	down
MW0168991	CYMARIN	Steroids	Cardiac glycoside	C30H44O9	2	0.7824	508-77-0	10752.2	12630.6	11733	10518.3	9578.94	9750.6	1.20759	0.0634638	0.178816	1.17649	0.234494	insig
MW0169507	N-1-Naphthylbenzamide	Benzene and substituted derivatives	Benzene and substituted derivatives	C17H13NO	2	0.7817	634-42-4	166.95	912.72	474.4	186765	169891	170759	1.43971	0.00096251	0.0140103	0.00294658	-8.40674	down
MW0053734	Glycerophospho-N-Palmitoyl Ethanolamine	GP	PE	C21H44NO7P	2	0.7817	100575-09-5	23082.6	69677.2	66064	97064.8	86305.1	112596	1.02608	0.0731655	0.197723	0.536628	-0.898005	insig
MEDP2114	2-Amino-5-methyl-4-phenylthiazole	Benzene and substituted derivatives	Benzene and substituted derivatives	C10H10N2S	2	0.7798	30709-67-2	52199.3	39711.7	35760	62587	58233.1	53144.8	1.1593	0.0692108	0.189795	0.733889	-0.446365	insig
MEDN1401	5-Phenylpenta-2,4-dienoic acid	Organic acids	Organic acids	C11H10O2	2	0.7783	1552-94-9 | 28010-12-0 | 185152-35-6 | 38446-98-9	170303	174453	176743	161921	163473	155547	1.32455	0.0133163	0.0652384	1.08433	0.116801	insig
MW0052336	Diethyl fumarate	Others	Lactones	C8H12O4	2	0.7776	623-91-6 | 26298-06-6	147195	149901	156933	109252	119405	148251	1.0555	0.152103	0.31975	1.20462	0.268578	insig
MW0112865	Isovalerophenone	Others	Ketone compounds	C11H14O	2	0.7763	582-62-7	155548	146359	157827	168917	175810	152954	0.928103	0.195592	0.376252	0.923754	-0.11442	insig
MW0048964	Cnicine	Others	Lactones	C20H26O7	2	0.776	24394-09-0	133629	93338.1	102397	90698.4	101622	72937.3	0.865802	0.230918	0.415467	1.24168	0.312288	insig
MW0110612	15(S)-HETE Ethanolamide	Alcohol and amines	Amines	C22H37NO3	2	0.7758	161744-53-2	1349.21	397.21	1249.97	7980.49	11826	5139.08	1.34435	0.0603154	0.173214	0.120117	-3.05749	down
MW0107882	D-homoserine lactone	Others	Ketone compounds	C4H7NO2	2	0.7749	51744-82-2	519.49	390.58	252.13	2161.5	3946.64	3806.12	1.40974	0.034477	0.120565	0.117225	-3.09265	down
MW0052505	Ecdysone	Organic acids	Organic acids	C27H44O6	2	0.7746	3604-87-3	4737.36	4237.7	4371.66	106.18	1927.13	2894.65	0.911231	0.0709354	0.193251	2.70837	1.43742	insig
MW0169069	6H-Indolo(2,3-a)quinolizin-5-ium, 3-ethyl-7,12-dihydro-	Heterocyclic compounds	Heterocyclic compounds	C17H17N2+	2	0.7743	55371-52-3 | 50651-13-3	651.8	7773.63	3639.59	2329.65	14603.9	30876	0.781907	0.283997	0.472976	0.252356	-1.98647	insig
MW0127754	(+)-Medicarpin	Flavonoids	Other Flavonoids	C16H14O4	2	0.7742	33983-39-0 | 33983-40-3	5796.85	12375.7	17143.4	8880.51	1671.14	8188.28	0.760762	0.248334	0.434584	1.88453	0.914205	insig
MW0116019	3,4-Methylenedioxycinnamaldehyde	Others	Aldehyde compounds	C10H8O3	2	0.7741	14756-00-4 | 58095-77-5	66524.1	2454.55	2282.1	12293.7	48388.6	5938.86	0.412844	0.954456	0.975326	1.06964	0.0971266	insig
MW0126851	3-(3-methylbut-2-en-1-yl)-3H-purin-6-amine	Heterocyclic compounds	Heterocyclic compounds	C10H13N5	2	0.7735	10091-84-6	106168	105555	100325	100082	99176.5	95538.7	1.135	0.0729847	0.197367	1.05851	0.0820403	insig
MW0127814	Isovitexin 2''-O-arabinoside	Alcohol and amines	Alcohols	C26H28O14	2	0.7731	53382-71-1	110561	92715.8	28561.9	86501.5	124694	207284	0.824255	0.233695	0.41841	0.554003	-0.852034	insig
MW0127419	Butylate	Others	Lactones	C11H23NOS	2	0.7716	2008-41-5	1565.44	1745.37	3219.28	6028.55	4130.36	3257.89	1.15291	0.0887548	0.225921	0.48671	-1.03887	down
MW0111641	ISOPEONOL	Others	Ketone compounds	C9H10O3	2	0.7713	493-33-4	16645.2	25956	15873.8	30983.2	27178.9	16175.2	0.601222	0.395213	0.578823	0.786616	-0.346268	insig
MW0153757	Met-Glu	Amino acids and derivatives	Amino acids and derivatives	C10H18N2O5S	2	0.771	14517-44-3	9768.38	2768.7	4878.56	2788.06	934.03	1485.56	1.12768	0.182374	0.360406	3.34424	1.74168	up
MW0010652	Saucernetin	Lignans and Coumarins	Lignans	C22H28O5	2	0.771	83377-13-3	220.6	195.63	328.95	9519.54	7879.11	9039.51	1.4527	0.00304356	0.0265046	0.0281858	-5.14889	down
MW0113988	beta-D-Galp-(1->3)-D-GalpNAc	Others	Saccharides	C14H25NO11	2	0.7708	20972-29-6	1.24782e+06	1.21669e+06	1.26133e+06	1.08976e+06	1.09625e+06	1.11335e+06	1.42923	0.00231638	0.0227242	1.12926	0.17538	insig
MW0006718	N-(3-nitrophenyl)decanamide	Benzene and substituted derivatives	Benzene and substituted derivatives	C16H24N2O3	2	0.7707	72298-61-4	3294.07	1593.73	833.41	68590.3	54474.7	126946	1.41747	0.0666975	0.18521	0.0228838	-5.44953	down
MW0010749	(+)-7-iso-Jasmonic acid	Organic acids	Organic acids	C12H18O3	2	0.7701	62653-85-4	2738.06	2627.69	1118.43	71981.9	64121.6	69769.2	1.43911	0.000768411	0.0129059	0.0314961	-4.98868	down
MW0155444	Phe-Gly-Gly	Amino acids and derivatives	Amino acids and derivatives	C13H17N3O4	2	0.7696	23576-42-3	24671.8	32250.7	26024.1	16529.7	16700.2	17736.1	1.37594	0.0416614	0.136089	1.62749	0.702651	insig
MW0107917	L-Name	Others	Lactones	C7H15N5O4	2	0.7687	50903-99-6	11996.5	9311.64	3808.05	23416.7	17838.6	22096	1.19639	0.0156738	0.0726399	0.396459	-1.33476	down
MW0105581	Alitame	Organic acids	Organic acids	C14H25N3O4S	2	0.7683	80863-62-3	521601	571674	537241	440404	298863	411048	1.20856	0.0531614	0.159029	1.41745	0.503299	insig
MW0107090	Glycyl-L-prolyl-L-lysine	Amino acids and derivatives	Amino acids and derivatives	C13H24N4O4	2	0.7674	52766-29-7	5299.4	5446.48	9664.46	27243	29405.1	27702.3	1.40845	0.00121521	0.0160647	0.241971	-2.04709	down
MW0013392	2-Aminohexadecanoic acid	Organic acids	Organic acids	C16H33NO2	2	0.7673	7769-79-1	898.44	1230	1414.6	1840.91	520.46	1221.37	0.177073	0.976569	0.987547	0.988919	-0.0160756	insig
MW0168670	9,12-Octadecadiynoic Acid	Lipids	Free fatty acids	C18H28O2	2	0.7655	2012-14-8	86133.8	99766.7	103295	70099.8	82529.1	98323.4	0.80313	0.270268	0.459303	1.15239	0.204631	insig
MW0002106	2,3',4,6-Tetrahydroxybenzophenone	Flavonoids	Other Flavonoids	C13H10O5	2	0.7642	26271-33-0	28175.4	7238.62	2487.06	2327.94	28151.3	3110.62	0.207787	0.907282	0.949185	1.12835	0.174214	insig
MW0006798	Dicyclohexyl phthalate	Benzene and substituted derivatives	Benzene and substituted derivatives	C20H26O4	2	0.7635	84-61-7	13006.9	12758.7	13455.2	67080.8	68178.6	63843.5	1.45826	0.000453222	0.00985341	0.196987	-2.34382	down
MW0008806	N(4)-Acetylsulfadiazine	Benzene and substituted derivatives	Benzene and substituted derivatives	C12H12N4O3S	2	0.7628	127-74-2 | 5572-57-6	785808	821649	718442	693170	662061	654108	1.25334	0.058101	0.168777	1.15754	0.211067	insig
MW0154159	N-3-oxo-hexadec-11(Z)-enoyl-L-Homoserine lactone	Amino acids and derivatives	Amino acids and derivatives	C20H33NO4	2	0.7625	1269663-80-0	194.51	183.29	102.09	49.5	160.84	153.76	0.559751	0.45324	0.623684	1.31802	0.398369	insig
MW0113885	Aloesin	Others	Chromone	C19H22O9	2	0.7623	30861-27-9	9435.71	18764	19144.2	24357.8	28225.2	18682.9	0.943359	0.132706	0.292463	0.664328	-0.590033	insig
MW0011871	1,2-Dihexanoyl-sn-glycerol	GL	DG	C15H28O5	2	0.7614	30403-47-5	46835.1	46233.4	52452.8	65526.2	57844	64144	1.33622	0.0112724	0.0594124	0.776055	-0.36577	insig
MW0053897	(Z)-Hexadec-9-en-1-ol	Organic acids	Organic acids	C16H32O	2	0.7613	10378-01-5	8938.57	4872.92	7590.94	4188.32	6253.5	4077.61	0.928955	0.190254	0.370046	1.47405	0.55979	insig
MADN0517	Thioisonicotinamide	Others	Others	C6H6N2S	2	0.761	2196-13-6	984193	998923	986215	906540	917826	945112	1.36463	0.0173227	0.0780393	1.07216	0.100524	insig
MW0006920	DMABA NHS Ester	Benzene and substituted derivatives	Benzene and substituted derivatives	C13H14N2O4	2	0.7604	58068-85-2	107.82	51.67	41.17	288.05	2936.06	1889.33	1.29382	0.167199	0.340307	0.0392417	-4.67147	down
MW0126929	Ursinoic acid	Benzene and substituted derivatives	Benzene and substituted derivatives	C15H16O5	2	0.7595	30265-59-9	5317.43	8864.92	6625.72	129.15	6288.76	2985.15	0.815862	0.155834	0.324139	2.2129	1.14594	insig
MW0169896	TAXININE M	Others	Others	C35H44O14	2	0.7592	135730-55-1	7834.51	11217.1	11627.1	428.13	1196.48	1823.71	1.36165	0.0107005	0.0575827	8.89674	3.15328	up
MW0138437	Ichthynone	Others	Ketone compounds	C23H20O7	2	0.7581	24340-62-3	55266	62375.2	53745.3	40671.6	43110.2	37017.5	1.37074	0.0090188	0.0520226	1.41877	0.504643	insig
MW0111217	N-Methyldioctylamine	Alcohol and amines	Amines	C17H37N	2	0.7581	4455-26-9	1861.02	1994.84	2508.66	928.44	658.82	1014.91	1.37549	0.0105211	0.0573257	2.44585	1.29034	up
MW0125062	Methyl pyrimidine-2-carboxylate	Others	Lactones	C6H6N2O2	2	0.758	34253-03-7	20184.1	15357	20984.7	29166.5	19633.7	14311.8	0.242763	0.675472	0.792408	0.895645	-0.159001	insig
pme0321	Kaempferol-7-rhamnoside	Flavonoids	Flavonols	C21H20O10	2	0.7575	20196-89-8	2866.56	831.63	2196.32	2143.31	1227.54	2164.16	0.0484356	0.870171	0.926956	1.06495	0.090786	insig
MW0055499	Ophiopogonin D	Steroids	Steroidal saponins	C44H70O16	2	0.7564	945619-74-9 | 125150-67-6	26002.5	15570.2	8834.42	19946.4	13154	14580.6	0.0482928	0.878422	0.930867	1.05717	0.0802125	insig
MW0115745	Cannabichromene	Others	Others	C21H30O2	2	0.7559	20675-51-8 | 18793-28-7	71441.3	60966.8	68822.1	68646.1	69366.9	53785.3	0.38466	0.631685	0.763644	1.04918	0.0692573	insig
MW0108412	N-(2-Oxotetrahydrofuran-3-YL)octanamide	Alcohol and amines	Amines	C12H21NO3	2	0.7556	147852-84-4	12944.3	21078.5	21315.8	397240	347625	319881	1.44886	0.00404061	0.0315732	0.0519735	-4.26608	down
MW0006086	Aspulvinone E	Phenolic acids	Phenolic acids	C17H12O5	2	0.755	49637-60-7	50794	53356.2	17613.8	64562.7	44542.9	72151.1	0.775773	0.240759	0.426886	0.671777	-0.573946	insig
MW0054902	Methyl cis-9-tetradecenoate	FA	Others	C15H28O2	2	0.7549	56219-06-8	1.37214e+06	1.36211e+06	1.29416e+06	3.68367e+06	3.68781e+06	3.31613e+06	1.45412	0.00225262	0.0223159	0.376923	-1.40766	down
MW0114318	Atrinositol	Organic acids	Organic acids	C6H15O15P3	2	0.7543	28841-62-5	20.31	1116.69	754.08	445.12	482.8	51.68	0.0711915	0.456256	0.626229	1.93046	0.948946	insig
MW0124177	Furafylline	Heterocyclic compounds	Heterocyclic compounds	C12H12N4O3	2	0.7542	80288-49-9	171358	173131	178056	156116	163826	158861	1.34722	0.00874834	0.050973	1.09136	0.126125	insig
MW0057740	1,2-Dihexanoyl-sn-glycero-3-phosphocholine	GP	PC	C20H40NO8P	2	0.754	34506-67-7	2028.92	6050.65	2552.23	1714.97	6758.7	7693.15	0.417369	0.463163	0.632007	0.657631	-0.60465	insig
MW0015831	Antheraxanthin	Heterocyclic compounds	Heterocyclic compounds	C40H56O3	2	0.754	640-03-9 | 68831-78-7 | 25494-44-4	168058	81457.8	82049.8	102184	42561.7	14963.7	0.900714	0.212812	0.397874	2.07606	1.05385	insig
MW0117270	Pac-1	GP	PA	C23H28N4O2	2	0.7538	315183-21-2	1.02989e+06	1.00774e+06	985206	1.46466e+06	1.35555e+06	1.3015e+06	1.41892	0.0122129	0.0620183	0.733395	-0.447338	insig
MW0014651	5,8,11-Eicosatriynoic Acid	Lipids	Free fatty acids	C20H28O2	2	0.7537	13488-22-7	110306	24289.3	135510	167107	41529	49736.9	0.0177316	0.944534	0.968513	1.04541	0.0640702	insig
MW0137097	7-Methoxy-4-methylcoumarin	Lignans and Coumarins	Coumarins	C11H10O3	2	0.7527	2555-28-4	84466.3	81761.4	73527.9	66484.6	69215.8	60959.2	1.26851	0.0281653	0.104557	1.21914	0.285864	insig
MW0157301	Sumaresinol	Terpenoids	Triterpene	C30H48O4	2	0.7526	559-64-8	135955	118118	147576	162148	143879	153347	0.994932	0.142666	0.306017	0.874341	-0.193733	insig
MW0130748	2H,8H-Benzo[1,2-b:3,4-b']dipyran-2-one, 9,10-dihydro-9-hydroxy-8,8-dimethyl-, (R)-	Benzene and substituted derivatives	Benzene and substituted derivatives	C14H14O4	2	0.7516	19380-05-3	1057.74	246.55	304.68	281.66	673.21	1244.82	0.406101	0.634128	0.764824	0.731453	-0.451163	insig
MEDN1869	N-(4-nitrophenyl)decanamide	Benzene and substituted derivatives	Benzene and substituted derivatives	C16H24N2O3	2	0.7511	72298-63-6	2212.32	2329.89	1782.33	1881.23	2669.71	3278.42	0.688421	0.344088	0.53067	0.807798	-0.307934	insig
MW0006843	Diisodecyl phthalate	Benzene and substituted derivatives	Benzene and substituted derivatives	C28H46O4	2	0.7494	26761-40-0 | 89-16-7 | 68515-49-1 | 19269-67-1	142564	198516	113034	76981	99444.3	97649.6	1.16415	0.130033	0.289345	1.6569	0.728486	insig
MW0009169	N-[2-(3,4-Dihydroxyphenyl)ethyl]hexadecanamide	Lipids	Free fatty acids	C24H41NO3	2	0.749	136181-87-8	754.26	405.41	145.21	558.09	976.13	1480.47	0.955623	0.160117	0.330733	0.432841	-1.20809	insig
MW0153758	Met-Gly-Met	Amino acids and derivatives	Amino acids and derivatives	C12H23N3O4S2	2	0.7471	14486-10-3	33889.3	36177.5	37132.2	30776.8	33057.3	27383.1	1.16792	0.0630325	0.17785	1.17521	0.232912	insig
MW0141122	Dioleoylphosphatidylcholine	GP	PC	C44H84NO8P	2	0.747	52088-89-8	39290.4	63427.9	37746.4	156789	66619.6	179071	1.19155	0.119167	0.274091	0.348998	-1.51871	down
MW0137829	Cyanidin 3-arabinoside cation	Flavonoids	Anthocyanidins	C20H19O10+	2	0.7466	792868-19-0 | 324533-66-6	243534	232709	245191	285628	249172	250986	0.966761	0.205381	0.389325	0.918105	-0.123269	insig
MW0012354	(+/-)14(15)-Epetre methyl ester	Lipids	Free fatty acids	C21H34O3	2	0.7461	73804-67-8 | 70219-56-6	82537.4	70674.7	90878.2	84215.4	110846	307190	0.838834	0.345434	0.5316	0.485992	-1.041	insig
MW0008927	n-Benzylacetamidine	Benzene and substituted derivatives	Benzene and substituted derivatives	C9H12N2	2	0.7459	69981-57-3	40627.8	47900.3	49896.1	390072	358577	385063	1.45591	0.000374417	0.00903982	0.122098	-3.03389	down
MW0014283	3-Thiatetradecanoic Acid	FA	Others	C13H26O2S	2	0.7459	116296-31-2	178862	189133	178855	199618	172078	174253	0.0517062	0.977017	0.987547	1.00165	0.00237805	insig
MW0016350	1,3-Benzenediol, 2-[3-methyl-6-(1-methylethenyl)-2-cyclohexen-1-yl]-5-pentyl-, (1R-trans)-	Alcohol and amines	Alcohols	C21H30O2	2	0.7457	74219-29-7	35890.1	77251.7	53503.2	141604	102259	88979.9	1.18189	0.0532068	0.159029	0.500671	-0.998064	insig
MW0154784	O-Toluenesulfonamide	Benzene and substituted derivatives	Benzene and substituted derivatives	C7H9NO2S	2	0.7457	88-19-7 | 8013-74-9	35738	62842.5	70945.1	67499.3	44576.9	50561.4	0.0460615	0.86639	0.924272	1.04235	0.0598415	insig
MW0103150	Xanthorrhizol	Phenolic acids	Phenolic acids	C15H22O	2	0.7456	30199-26-9	1070.02	127.96	354.13	906.74	427.11	217.25	0.179872	0.999282	0.99958	1.00065	0.000939106	insig
MW0054028	Ipecoside	Others	Lactones	C27H35NO12	2	0.7422	15401-60-2	6205.45	4373.86	5352.75	6929.6	6735.46	8403.99	1.1713	0.0519238	0.15612	0.721919	-0.470092	insig
MW0109354	Pro-Asp	Amino acids and derivatives	Amino acids and derivatives	C9H14N2O5	2	0.7418	85227-98-1	5662.19	5232.05	8097.76	4118.85	2608.33	7222.38	0.733148	0.367867	0.554275	1.36148	0.445172	insig
MW0140017	Abscisic acid	Organic acids	Organic acids	C15H20O4	2	0.7418	14398-53-9 | 21293-29-8	48657.7	50192.8	57441.9	82194.4	49895.8	60101.8	0.758422	0.335805	0.522565	0.813209	-0.298301	insig
MW0063755	Taxol C	Alkaloids	Alkaloids	C46H57NO14	2	0.7411	153415-45-3	2113.71	1262.5	915.13	1430.31	580.98	1665.15	0.329351	0.694422	0.806167	1.16725	0.223119	insig
MW0000426	Rhoeadine	Alkaloids	Alkaloids	C21H21NO6	2	0.7407	2718-25-4	1279.3	2820.25	1210.06	2894.65	3691.48	1493.8	0.71493	0.330485	0.51668	0.657136	-0.605737	insig
MW0006246	Phosphine-biotin	Benzene and substituted derivatives	Benzene and substituted derivatives	C41H53N4O8PS	2	0.7402	608514-42-7	406.78	291.94	134.63	1552.84	765.86	159.48	0.703999	0.305786	0.494389	0.336275	-1.57229	insig
MW0010792	(+)-trans-Chrysanthemic acid	Organic acids	Organic acids	C10H16O2	2	0.7397	4638-92-0	12971.8	15678.4	19262.6	14177	13898.8	11575.2	0.826295	0.268684	0.458496	1.20836	0.273053	insig
MW0012407	15(S)-Hede	Lipids	Free fatty acids	C20H36O3	2	0.7387	92693-04-4	376.1	807.74	1325.63	2414.91	738.52	1485.76	0.772995	0.288196	0.477602	0.540928	-0.88649	insig
MW0107173	Glycyl-l-histidyl-l-lysine	Amino acids and derivatives	Amino acids and derivatives	C14H24N6O4	2	0.7386	49557-75-7	16555.1	28167.3	236.18	2743.83	8702.12	474.32	0.311836	0.305556	0.494389	3.77161	1.91518	insig
MW0001202	4-Methylphenylacetone	Benzene and substituted derivatives	Benzene and substituted derivatives	C10H12O	2	0.7379	2096-86-8	715.8	1028.32	1948.1	3866.08	495.16	1164.69	0.160372	0.622518	0.756706	0.668163	-0.581729	insig
MW0000153	Bicuculline	Alkaloids	Isoquinoline alkaloids	C20H17NO6	2	0.7373	485-49-4	9304.52	7127.92	5162.19	6704.6	3052.08	6533.54	0.659935	0.353847	0.540216	1.32562	0.406667	insig
MW0169689	Pomiferin	Flavonoids	Other Flavonoids	C25H24O6	2	0.7362	572-03-2	19564.1	23382.8	12601.8	77050.5	78677.2	78526.5	1.41536	0.00224875	0.0223159	0.23713	-2.07625	down
MW0009117	Phenpromethamine	Alkaloids	Alkaloids	C10H15N	2	0.7362	93-88-9	9420.8	1828.59	10833.8	19349.1	2262.45	29008.8	0.453751	0.34966	0.536157	0.436252	-1.19677	insig
MW0008516	Diphenylmethylene-Glycine benzyl ester	Benzene and substituted derivatives	Benzene and substituted derivatives	C22H19NO2	2	0.7342	81477-91-0	38828.1	36797.8	54049.3	48143.8	50631.2	34479.4	0.120793	0.879874	0.931677	0.973141	-0.0392797	insig
MW0006902	Methyldiphenylphosphine oxide	Benzene and substituted derivatives	Benzene and substituted derivatives	C13H13OP	2	0.7338	2129-89-7	20151.6	19824	34308.5	16893.6	10825.2	7547.98	1.15603	0.0940239	0.233871	2.10635	1.07474	up
MW0053814	Harpagoside	Terpenoids	Monoterpenoids	C24H30O11	2	0.7329	19210-12-9	45993.9	39386.1	35220.6	47197.5	46492.2	44573.6	0.974908	0.195999	0.376857	0.872253	-0.197181	insig
MEDP1235	Dipropyl phthalate	Others	Lactones	C14H18O4	2	0.7304	131-16-8	6712.07	7877.41	4884.28	3825.09	3945.72	3782.42	1.27272	0.0933277	0.233146	1.68557	0.753235	insig
MW0128402	(S,S)-(-)-Hydrobenzoin	Benzene and substituted derivatives	Benzene and substituted derivatives	C14H14O2	2	0.7252	2325-10-2 | 655-48-1	47.64	281.02	146.3	275.56	287.55	145.79	0.678661	0.399787	0.582025	0.669996	-0.577776	insig
MW0015399	Methyl alpha-eleostearate	Lipids	Free fatty acids	C19H32O2	2	0.7248	4175-47-7	163783	184056	170552	196209	164658	161126	0.0421141	0.93023	0.963196	0.993099	-0.00999062	insig
MW0119764	3-Pyrimidin-2-yl-2-pyrimidin-2-ylmethyl-propionic acid	Organic acids	Organic acids	C12H12N4O2	2	0.7225	936643-76-4	55438.1	49168.3	41769.9	48697	42828	45935.4	0.444474	0.54381	0.694313	1.06486	0.0906653	insig
MW0011852	1,2-Didecanoyl-sn-glycero-3-phosphocholine	GP	PC	C28H56NO8P	2	0.7211	3436-44-0	9284.27	8572.85	7062.14	18978.8	8128.04	12991.7	0.924762	0.245373	0.4309	0.62145	-0.686291	insig
MW0133704	4'-Methoxyflavanone	Flavonoids	Flavones	C16H14O3	2	0.7189	3034-08-0 | 97005-76-0	492854	494596	467780	778641	792159	717390	1.44128	0.00300316	0.0262662	0.635974	-0.652959	insig
MW0110250	Tyr-glu	Amino acids and derivatives	Amino acids and derivatives	C14H18N2O6	2	0.7176	2545-89-3	86889.9	102593	142380	141602	145368	84075.9	0.320272	0.640245	0.769668	0.8944	-0.161009	insig
MW0056741	Palmitoleoyl 3-carbacyclic Phosphatidic Acid	Lipids	Free fatty acids	C20H37O5P	2	0.7164	910228-13-6	167592	8784.44	133641	143615	17852.2	173433	0.164713	0.908608	0.949588	0.925703	-0.111379	insig
MW0108024	Lys-Trp-Lys	Amino acids and derivatives	Amino acids and derivatives	C23H36N6O4	2	0.7149	38579-27-0	104.47	2799.97	2902.28	3950.52	4356.25	2848.59	0.759149	0.181748	0.359395	0.520532	-0.941942	insig
MW0053496	Geranylgeraniol	Alcohol and amines	Alcohols	C20H34O	2	0.7133	24034-73-9 | 7614-21-3	99636.6	194793	49159.1	105195	153853	98509.3	0.290414	0.926731	0.960807	0.960935	-0.0574899	insig
MW0009489	Plumbagin	Quinones	Quinones	C11H8O3	2	0.7132	481-42-5	24827.7	41972.8	34682	33940.9	38833.8	36108.5	0.406165	0.674185	0.791605	0.932031	-0.10155	insig
MW0138164	Fisetinidol	Flavonoids	Flavanonols	C15H14O5	2	0.7118	490-49-3	960338	1.01869e+06	1.11945e+06	772510	724593	720988	1.39749	0.0155683	0.072234	1.39691	0.482238	insig
MW0140518	(E) 9-octadecen-1-ol	Others	Others	C18H36O	2	0.7085	506-42-3	283.48	528.6	1486.91	462.38	145.18	505.38	0.651612	0.396686	0.579771	2.06569	1.04662	insig
MW0169561	N-nonanoyl-L-Homoserine lactone	Others	Lactones	C13H23NO3	2	0.7081	177158-21-3	23.42	3.45	34.31	2429.55	1741.8	578.85	1.37067	0.101498	0.246383	0.0128795	-6.27878	down
MW0007557	M-Tolyl acetate	Others	Lactones	C9H10O2	2	0.7054	122-46-3	54654.7	62993.4	61146.8	114865	101119	118797	1.42812	0.00380208	0.0302368	0.534065	-0.904914	insig
MW0112714	3,5,5-Trimethylcyclohexane-1,2-dione	Others	Ketone compounds	C9H14O2	2	0.7024	57696-89-6	3405.64	1834.47	3539.23	150478	152700	142409	1.45056	0.000322706	0.00844904	0.0197029	-5.66545	down
MW0119160	3',4'-(Methylenedioxy)acetophenone	Others	Ketone compounds	C9H8O3	2	0.702	3162-29-6	1337.29	1580.64	1702.2	3277.39	723.58	2132.34	0.180058	0.566324	0.712455	0.753285	-0.408732	insig
MW0137107	7-Methoxyflavanone	Others	Ketone compounds	C16H14O3	2	0.7014	21785-09-1	5673.62	6047.06	7744.69	2840.94	3102.1	1633.69	1.32689	0.00934198	0.0530237	2.5691	1.36126	up
MW0011652	4-Isopropenylcyclohexene-1-carboxylic acid	Organic acids	Organic acids	C10H14O2	2	0.7012	23635-14-5	81438.8	80391.4	85487.8	353478	319947	328157	1.45708	0.00129327	0.0165014	0.246927	-2.01784	down
MW0138679	Kaempferol-3-Rhamnoside-4''-Rhamnoside-7-Rhamnoside	Flavonoids	Flavones	C33H40O18	2	0.7007	129369-23-9	159.15	243.55	242.87	274.78	951.13	108.94	0.402369	0.466891	0.635205	0.483627	-1.04803	insig
MW0128017	Catechin tetramethylether	Benzene and substituted derivatives	Benzene and substituted derivatives	C19H22O6	2	0.7007	51079-25-5	920.89	1930.89	1868.04	1932.15	3885.51	2789.68	1.0189	0.135601	0.29588	0.548348	-0.866836	insig
MW0062288	methyl 5'-oxo-1-[3,4,5-trihydroxy-6-(hydroxymethyl)oxan-2-yl]oxy-4'-[1-[3-[4-[3,4,5-trihydroxy-6-(hydroxymethyl)oxan-2-yl]oxyphenyl]prop-2-enoyloxy]ethyl]spiro[4a,7a-dihydro-1H-cyclopenta[c]pyran-7,2'-furan]-4-carboxylate	Others	Lactones	C36H42O19	3	0.9991	80396-57-2	15263.4	17185.1	15011.9	43748.4	40339.6	42400.1	1.45178	6.38358e-05	0.0035748	0.375216	-1.41421	down
FDATN01519	D-phenylalanine	Amino acids and derivatives	Amino acids and derivatives	C9H11NO2	3	0.9881	673-06-3	4.88063e+06	4.93149e+06	4.99977e+06	3.90126e+06	3.88075e+06	3.95386e+06	1.45467	5.88499e-05	0.00349966	1.26211	0.335832	insig
MW0152742	Loganin pentaacetate	Others	Lactones	C27H36O15	3	0.9828	20586-11-2	7535.4	137.11	107.3	298.49	5448.69	5462.99	0.58064	0.725562	0.828979	0.693996	-0.527001	insig
MW0003013	2-Ethoxy-5-(4-methylpiperazin-1-yl)sulfonylbenzoic acid	Benzene and substituted derivatives	Benzene and substituted derivatives	C14H20N2O5S	3	0.982	194602-23-8	132895	142671	147283	181694	188083	182572	1.41851	0.003336	0.027691	0.765548	-0.385436	insig
MW0139190	(1R,4E,5'S,6S,6'S,7R,8S,10R,11R,12S,14R,15S,16R,18E,20E,22R,25S,27R,28S)-22-ethyl-7,11,14,15-tetrahydroxy-6'-[(2R)-2-hydroxypropyl]-5',6,8,10,12,14,16,28,29-nonamethylspiro[2,26-dioxabicyclo[23.3.1]nonacosa-4,18,20-triene-27,2'-oxane]-3,9,13-trione	Heterocyclic compounds	Heterocyclic compounds	C45H74O11	3	0.966	579-13-5	38225.1	43183.3	27614.8	26019.1	59608.8	46981.9	0.392282	0.522682	0.677638	0.822135	-0.282553	insig
MEDP1465	(2S,3S)-butane-2,3-diol	Alcohol and amines	Alcohols	C4H10O2	3	0.9632	19132-06-0	37481.8	40686.9	41211.6	30640.3	30251.7	15904.3	1.08211	0.092232	0.231948	1.55451	0.636456	insig
MW0004006	1-Naphthalenesulfonic acid, 3-hydroxy-	Benzene and substituted derivatives	Benzene and substituted derivatives	C10H8O4S	3	0.9598	6357-85-3	208273	190030	195931	103263	11109.6	94387.4	1.01952	0.0444297	0.140613	2.84649	1.50919	up
MEDP1310	4-Hydroxy-l-tryptophan	Amino acids and derivatives	Amino acids and derivatives	C11H12N2O3	3	0.9584	25242-90-4	540671	583530	561221	380281	384436	383893	1.44917	0.00439133	0.0334704	1.46736	0.553221	insig
MW0111391	4-O-feruloyl-D-quinic acid	Organic acids	Organic acids	C17H20O9	3	0.9563	76272-56-5	6060.31	2356.45	1169.07	1169.45	2554.13	768.06	0.711016	0.37143	0.557616	2.13415	1.09366	insig
MW0115167	Primeverin	Benzene and substituted derivatives	Benzene and substituted derivatives	C20H28O13	3	0.9506	154-60-9	43866.2	41456.1	42256.1	39944.7	14955.4	35673.4	0.827143	0.250416	0.4369	1.40856	0.494222	insig
MW0121655	1,2-Benzisothiazol-3(2H)-one, 5-nitro-, 1,1-dioxide	Benzene and substituted derivatives	Benzene and substituted derivatives	C7H4N2O5S	3	0.9464	22952-20-1	30610.8	33122	52144.8	102712	79369.3	100937	1.35188	0.00546907	0.0382835	0.409435	-1.28829	down
MEDP2105	3,6,9,12,15,18,21-Heptaoxatricosane-21,23-diol	Benzene and substituted derivatives	Benzene and substituted derivatives	C16H34O9	3	0.9321	5117-19-1	217464	164635	226672	39655.9	171037	169090	0.801674	0.214705	0.400041	1.60295	0.680727	insig
MEDP1271	Bis(2-ethylhexyl) phthalate	Phenolic acids	Phenolic acids	C24H38O4	3	0.9305	117-81-7 | 15495-94-0 | 8033-53-2 | 50885-87-5 | 82208-43-3	90113.2	79085.7	87360.7	99245.8	138011	119914	1.22958	0.0854844	0.220803	0.718309	-0.477323	insig
MW0006326	Dimethyloctadecylbenzylammonium	Benzene and substituted derivatives	Benzene and substituted derivatives	C27H50N+	3	0.9236	37612-69-4	68090.2	110180	372.34	72771.8	282.16	869.76	0.468155	0.435907	0.60879	2.41658	1.27297	insig
MW0140018	(-)-Acanthocarpan	Heterocyclic compounds	Heterocyclic compounds	C17H12O7	3	0.9224	70285-12-0	47160.5	54478.8	45945.5	69636.4	90379.3	59253.4	1.19619	0.111004	0.260974	0.673076	-0.571159	insig
MW0144176	9-Riburonosyladenine	Nucleotides and derivatives	Nucleotides and derivatives	C10H11N5O5	3	0.9216	3415-09-6	9621.86	20053.1	21077	15988.6	12128.8	9288.31	0.604612	0.360574	0.548203	1.3568	0.440204	insig
MEDP1067	Palmitoylisopropylamide	Lipids	Free fatty acids	C19H39NO	3	0.9198	189939-61-5	521.39	277.13	283.84	1889.21	804.23	400.18	0.981466	0.268765	0.458496	0.349868	-1.51512	insig
MW0137092	7-Methoxy-3-(4-methoxyphenyl)-4-phenylchromen-2-one	Lignans and Coumarins	Coumarins	C23H18O4	3	0.915	113435-02-2	13517.4	22200	16918.3	23687.5	22437.2	22747.2	1.03246	0.162777	0.334173	0.764256	-0.387872	insig
MW0154497	Nifuradene	Others	Ketone compounds	C8H8N4O4	3	0.9117	555-84-0	589305	546332	590961	297242	324185	315772	1.44868	0.000463978	0.00985341	1.8423	0.881505	insig
MW0010023	Usnic acid	Phenolic acids	Phenolic acids	C18H16O7	3	0.902	125-46-2	944.42	491.06	187.72	16335	13455.5	15048	1.40883	0.00197095	0.0207169	0.036201	-4.78783	down
MW0113950	[(2R,3R,4R,5R,6R)-2-[[(2R,3R,4R)-3,4-dihydroxy-4-(hydroxymethyl)oxolan-2-yl]oxymethyl]-4-[(2S,3R,4R,5R,6S)-4,5-dihydroxy-6-methyl-3-[(2S,3R,4S,5S)-3,4,5-trihydroxyoxan-2-yl]oxyoxan-2-yl]oxy-6-[2-(3,4-dihydroxyphenyl)ethoxy]-5-hydroxyoxan-3-yl] (E)-3-(3,4-dihydroxyphenyl)prop-2-enoate	Steroids	Steroid	C39H52O23	3	0.8978	188441-89-6	2255.87	9250.19	2732.09	2272.81	1300.12	1070.33	1.01668	0.290867	0.480645	3.06641	1.61655	up
MEDP1657	1-O-Hexadecyl-sn-glycero-3-phosphocholine	GP	PC	C24H52NO6P	3	0.8952	52691-62-0 | 97288-09-0	62.88	463.04	47.56	159.5	506.5	425.75	0.810146	0.374742	0.561069	0.525285	-0.928827	insig
MW0156520	2-[(1R,5R)-5-[2,4-dihydroxy-3-(3-methylbut-2-enyl)benzoyl]-5-(2,4-dihydroxyphenyl)-3-methylcyclohex-2-en-1-yl]-1,3,5a,8-tetrahydroxy-10a-(3-methylbut-2-enyl)-[1]benzofuro[3,2-b]chromen-11-one	Heterocyclic compounds	Heterocyclic compounds	C45H44O12	3	0.8934	81381-69-3	63638.7	53020.6	61722.1	57517.8	46774	48362.4	0.986789	0.140746	0.303634	1.16853	0.224697	insig
MW0154377	Neoschaftoside	Flavonoids	Flavones	C26H28O14	3	0.8911	61328-41-4	594373	592387	436986	418290	578539	524335	0.326089	0.652075	0.778167	1.06744	0.0941511	insig
MEDP2095	4-Methylbenzenecarbothioamide	Benzene and substituted derivatives	Benzene and substituted derivatives	C8H9NS	3	0.8771	2362-62-1	196.72	1503.84	4377.88	1498.94	7636.74	1686.43	0.575301	0.547159	0.696385	0.561669	-0.832209	insig
MW0147115	2-(3,4-dihydroxyphenyl)-5,7-dihydroxy-6-[(2S,3R,4R,5S,6R)-3,4,5-trihydroxy-6-(hydroxymethyl)oxan-2-yl]-8-[(2S,3R,4S,5S)-3,4,5-trihydroxyoxan-2-yl]chromen-4-one	Flavonoids	Flavones	C26H28O15	3	0.869	59952-97-5	547442	995396	429951	856435	731071	563414	0.347667	0.777948	0.86601	0.917184	-0.124717	insig
MW0142027	2,3-Diphenylquinoxaline-6-carboxylic acid	Organic acids	Organic acids	C21H14N2O2	3	0.8645	32387-96-5	29119.1	28217.6	30802.6	40522.1	35541.5	43610.7	1.34032	0.0363282	0.124358	0.736493	-0.441257	insig
FDATN01339	Vitexin 2''-O-rhamnoside	Flavonoids	Flavones	C27H30O14	3	0.8607	64820-99-1	581502	594706	541029	460840	486474	530222	1.21831	0.0392307	0.130618	1.16223	0.216896	insig
MW0146867	Brevicolline	Alkaloids	Alkaloids	C17H19N3	3	0.8602	20069-02-7	189.61	1249.58	6401.07	10707.8	3294.16	6073.14	0.889773	0.23208	0.417	0.390546	-1.35643	insig
MEDP1836	Nootkatone	Terpenoids	Sesquiterpenoids	C15H22O	3	0.8546	4674-50-4 | 28834-25-5	69393.5	66760.2	63623	59301.2	53390	53600.2	1.32431	0.0125803	0.0631679	1.20136	0.264674	insig
MW0115331	Swertiamarin	Terpenoids	Monoterpenoids	C16H22O10	3	0.8515	17388-39-5	31848.3	36830.2	37843.6	40633.5	40039.8	39983.8	1.11472	0.124306	0.282049	0.882849	-0.179762	insig
MW0141459	16alpha,17alpha-Dihydroxyprogesterone acetophenide	Others	Ketone compounds	C29H36O4	3	0.8437	1179-87-9 | 24356-94-3	92060.2	111885	41395.4	20533.2	119556	85012.3	0.275273	0.860598	0.920406	1.08991	0.12421	insig
MW0120183	4-Amino-2-(methylthio)pyrimidine-5-carboxamide	Alcohol and amines	Amines	C6H8N4OS	3	0.8386	89533-28-8	284045	271665	308204	305198	314303	284211	0.630612	0.39704	0.579771	0.955962	-0.0649749	insig
MW0000390	Oxymatrine	Alkaloids	Quinorisidine alkaloids	C15H24N2O2	3	0.8317	16837-52-8 | 54809-74-4	1.11078e+07	1.08341e+07	1.06715e+07	1.29374e+07	1.23862e+07	1.17226e+07	1.31193	0.0395241	0.13127	0.880342	-0.183865	insig
MW0000382	Ochrolifuanine A	Alkaloids	Alkaloids	C29H34N4	3	0.8265	35527-46-9	1808.57	1781.89	4749.3	5072.21	4386.09	8178.9	1.07976	0.114221	0.266164	0.472851	-1.08054	down
MEDP2102	3-Methylbenzenecarbothioamide	Benzene and substituted derivatives	Benzene and substituted derivatives	C8H9NS	3	0.8221	2362-63-2	180709	194041	189267	156276	141122	147761	1.39571	0.0026356	0.0244755	1.267	0.341416	insig
ZINC150355298	Kobophenol A	Others	Stilbene	C56H44O13	3	0.821	124027-58-3	85338.1	45121.9	74457.6	43925.5	38125.3	64425.7	0.798327	0.257864	0.445652	1.39898	0.484375	insig
MEDP1362	Methyl-tyrosine	Amino acids and derivatives	Amino acids and derivatives	C10H13NO3	3	0.813	19897-63-3	68971.4	76280.3	74975.7	66922.8	67425.2	67414	1.18375	0.110948	0.260974	1.09152	0.12634	insig
MW0157319	Synaptolepis factor K1	Terpenoids	Ditepenoids	C36H54O8	3	0.813	66268-94-8	32504.4	49644.1	27805.2	84164.3	70610.9	77510.1	1.32283	0.0107968	0.0575827	0.473356	-1.079	down
ZINC95909420	Aloeresin D	Flavonoids	Other Flavonoids	C29H32O11	3	0.8039	105317-67-7	555671	399601	608123	499529	620343	615279	0.535014	0.489838	0.652686	0.901013	-0.15038	insig
MW0154955	Pedilstatin	Terpenoids	Ditepenoids	C30H40O7	3	0.7984	70028-76-1	53375.1	54939.8	51759.7	52333.2	45440.5	47134.5	1.0825	0.119976	0.275481	1.10466	0.143605	insig
MW0155573	Pilocereine	Heterocyclic compounds	Heterocyclic compounds	C45H65N3O6	3	0.7969	2552-47-8	18020.9	21730	20187.1	21499.2	20746.2	18126.2	0.0724832	0.927121	0.960964	0.992819	-0.0103972	insig
MW0118297	2-Aminothiazole-5-carbonitrile	Heterocyclic compounds	Heterocyclic compounds	C4H3N3S	3	0.7946	51640-52-9	1.12997e+06	996744	1.09382e+06	1.15989e+06	1.14686e+06	1.21035e+06	1.07406	0.114665	0.266318	0.915678	-0.127087	insig
MW0108971	O-benzyl-L-serine	Amino acids and derivatives	Amino acids and derivatives	C10H13NO3	3	0.7886	4726-96-9 | 30916-68-8	20448	10957.1	13052.3	13123.3	5814.09	11161.9	0.805758	0.26067	0.448268	1.47703	0.562695	insig
MEDL00424	PAz-PC	GP	PC	C33H64NO10P	3	0.7885	117205-52-4	3889.72	4718.3	4652.81	4168.02	7428.24	4679.42	0.621855	0.427622	0.601595	0.814763	-0.295547	insig
MEDP1597	Securinine	Alkaloids	Terpenoid alkaloids	C13H15NO2	3	0.7882	5610-40-2	26891.7	15858.9	24558.3	324757	301349	298198	1.4477	0.000182341	0.00628374	0.0728212	-3.7795	down
MW0142123	2',7-Dihydroxy-4',5'-methylenedioxyisoflavone	Flavonoids	Flavones	C16H10O6	3	0.7851	21495-84-1	14006.3	13559.8	11044.6	17132	21839.7	11975.5	0.809519	0.283216	0.472261	0.757856	-0.400004	insig
MW0156203	Pterosterone	Steroids	Steroid	C27H44O7	3	0.7836	18089-44-6	133070	128673	134004	137931	152615	147215	1.22813	0.0675273	0.185977	0.904025	-0.145566	insig
MW0114989	Neohesperidose heptaacetate	Others	Saccharides	C26H36O17	3	0.7787	19949-47-4	487.52	5187.13	640.38	185.58	2685.45	2547.07	0.0510468	0.874564	0.928692	1.16554	0.221003	insig
MEDP1307	(2S,3S)-2-amino-3-phenylbutanoic acid	Amino acids and derivatives	Amino acids and derivatives	C10H13NO2	3	0.7774	25488-25-9	1954.44	7295.19	5337.45	5138.8	5032.98	3267.34	0.0600981	0.835995	0.903439	1.08542	0.118252	insig
MW0114793	Maltopentaose	Others	Saccharides	C30H52O26	3	0.7766	34620-76-3	74218.2	73128.5	70036.6	92834.2	77602.9	80481.6	1.13034	0.131075	0.2907	0.86635	-0.206979	insig
MW0119684	3-Methyl-1,5-Dihydropyrazolo[4,3-C]pyrazole	Heterocyclic compounds	Heterocyclic compounds	C5H6N4	3	0.776	42418-57-5	1.03465e+06	977665	1.08399e+06	1.03604e+06	1.15656e+06	1.10178e+06	0.844226	0.229297	0.413905	0.939876	-0.0894584	insig
MW0004444	4,4'-Methylenebis(2,6-DI-tert-butylphenol)	Benzene and substituted derivatives	Benzene and substituted derivatives	C29H44O2	3	0.775	118-82-1	3805.67	2555	2271.77	3096.97	2489.43	3698.21	0.312794	0.731143	0.83276	0.929758	-0.105073	insig
MW0000043	10-Hydroxycamptothecin	Alkaloids	Quinoline alkaloids	C20H16N2O5	3	0.7728	19685-09-7	7521.86	3244.73	9736.91	1274.43	2764.46	574.82	1.19084	0.0963932	0.237566	4.44404	2.15187	up
MW0002692	2-Amino-5-nitrobenzophenone	Benzene and substituted derivatives	Benzene and substituted derivatives	C13H10N2O3	3	0.7717	1775-95-7	809.66	166.41	815.73	695.79	277.62	329.39	0.219313	0.560487	0.706974	1.37535	0.459794	insig
MEDP1197	Hypotaurocyamine	Alcohol and amines	Polyamines	C3H9N3O2S	3	0.7707	1119-54-6	87028	85558.4	72591	82667.5	85146.1	80821.2	0.205876	0.828456	0.899295	0.986094	-0.0202024	insig
MEDP1670	Gly-Gly-Phe	Amino acids and derivatives	Amino acids and derivatives	C13H17N3O4	3	0.7667	6234-26-0	6868.66	8688.17	1662.26	13524.2	10070.3	4764.77	0.672233	0.326099	0.512753	0.607177	-0.719811	insig
MW0147897	Cyanidin 3-rutinoside-5-glucoside	Flavonoids	Anthocyanidins	C33H41ClO20	3	0.7642	62024-14-0	9059.23	18818.9	25790.8	26075.8	16895.5	20030.2	0.478268	0.612808	0.748967	0.851869	-0.231297	insig
MEDP1679	Glu-Val-Phe	Amino acids and derivatives	Amino acids and derivatives	C19H27N3O6	3	0.762	31461-61-7	376577	366579	316004	340525	345379	364567	0.0720429	0.896036	0.942064	1.00827	0.0118834	insig
MW0157192	Squamocin	FA	Others	C37H66O7	3	0.7563	120298-30-8	1942.81	2045.42	5186.35	3439.41	3646.67	1428.81	0.0768589	0.872929	0.92771	1.07747	0.107654	insig
MW0114124	Curculigoside	Phenolic acids	Phenolic acids	C22H26O11	3	0.7558	85643-19-2	2012.43	320.76	1035.08	1313.28	1489.18	1393.25	0.582553	0.631057	0.763403	0.802789	-0.316907	insig
MW0155592	Piptanthine	Alkaloids	Alkaloids	C20H35N3	3	0.7507	7344-67-4	1.07461e+06	1.05598e+06	1.07316e+06	1.39052e+06	1.28341e+06	1.26626e+06	1.40159	0.022067	0.090329	0.813097	-0.298501	insig
Zmgn000503	2,3-Dihydroxy-3-methylbutanoic acid	Organic acids	Organic acids	C5H10O4	3	0.7443	1756-18-9	335.9	446.58	953.57	2698.25	5667.45	4502.15	1.36846	0.044523	0.140687	0.134914	-2.88989	down
MW0148218	Delavaine A	Benzene and substituted derivatives	Benzene and substituted derivatives	C38H54N2O11	3	0.7442	109291-57-8	30402.2	29752.7	27882.7	16556.2	20618.2	17471.6	1.39914	0.00314136	0.0270789	1.61105	0.688004	insig
MEDP0734	2-Aminophenol	Alkaloids	Phenolamine	C6H7NO	3	0.7442	95-55-6	445266	414826	422843	442349	73668.1	384081	0.683599	0.380751	0.567327	1.42533	0.511294	insig
MW0154445	Neurosporaxanthin	Terpenoids	Tetraterpenes	C35H46O2	3	0.7433	2468-88-4	328934	292222	318063	348047	301792	338169	0.594563	0.415267	0.592268	0.950618	-0.073062	insig
MW0054900	Methyl linolenate	Lipids	Free fatty acids	C19H32O2	3	0.7431	301-00-8	609437	401084	585732	280123	670390	408619	0.498399	0.590213	0.731103	1.17447	0.232004	insig
MW0015923	Artemisinin	Terpenoids	Sesquiterpenoids	C15H22O5	3	0.7408	63968-64-9	257315	254746	249355	42545.1	51025.6	46625.1	1.45605	4.40353e-07	0.000305224	5.4311	2.44124	up
MW0157326	methyl (1R,12R,14S,15E)-12-[(1R,15S,17S,18S)-17-ethyl-3,13-diazapentacyclo[13.3.1.02,10.04,9.013,18]nonadeca-2(10),4(9),5,7-tetraen-6-yl]-15-ethylidene-17-methyl-10,17-diazatetracyclo[12.3.1.03,11.04,9]octadeca-3(11),4,6,8-tetraene-18-carboxylate	Alkaloids	Alkaloids	C40H48N4O2	3	0.7398	59626-92-5	276628	252679	268721	360560	304900	324302	1.29312	0.0431255	0.138111	0.806283	-0.310641	insig
MW0115414	2-Propanol, 1-[2-(2-methoxy-1-methylethoxy)-1-methylethoxy]-	Alcohol and amines	Alcohols	C10H22O4	3	0.7382	20324-33-8	1543.35	4051.15	8557.61	10932.4	25499.9	20475.9	1.18667	0.0605052	0.173511	0.248683	-2.00762	down
MW0001490	14-((4-Methoxyphenyl)diphenylmethoxy) Daunomycinone	Benzene and substituted derivatives	Benzene and substituted derivatives	C41H34O10	3	0.7378	59326-04-4	49720.8	47063.8	48922.6	69593.6	85239	58729.6	1.2583	0.0973486	0.239044	0.68227	-0.551585	insig
MW0055375	Nostoxanthin	FA	Others	C40H56O4	3	0.735	29307-44-6	33372.8	24452.2	17971.6	43340.9	5096.91	24491.2	0.354533	0.941721	0.967317	1.03932	0.055641	insig
MW0156443	Rugosal	Others	Others	C15H22O4	3	0.7339	121387-05-1	1987.32	3076.86	2083.52	4247.13	141.54	3509.27	0.38011	0.864219	0.92281	0.905008	-0.143997	insig
MW0000116	ATM4 4-Acetoxy Analog	Benzene and substituted derivatives	Benzene and substituted derivatives	C23H25NO5	3	0.7332	91295-74-8	3947.87	3186.73	4282.04	3065.27	3181.75	2795.6	1.11305	0.12263	0.279964	1.26254	0.336325	insig
MW0000486	Ethyl eburnamenine-14-carboxylate	Alkaloids	Alkaloids	C22H26N2O2	3	0.7319	77549-94-1 | 68780-77-8	16856.8	18189.4	21662	25283.8	11078.9	38184.8	0.304863	0.528543	0.683125	0.760699	-0.394602	insig
ZINC13548595	(9Z,12Z)-octadeca-9,12-dienal	Lipids	Free fatty acids	C18H32O	3	0.7306	2541-61-9	6842.25	8012.76	6682.9	25673	20104.6	27814.9	1.43455	0.0147222	0.0692647	0.292664	-1.77268	down
MW0000297	Hydroquinidine	Alkaloids	Quinoline alkaloids	C20H26N2O2	3	0.7303	1435-55-8	91022.5	58049.4	81518.5	80087.8	82079.4	80353.7	0.355073	0.724394	0.828114	0.950806	-0.072777	insig
MW0150782	Hexadecasphinganine	SL	SPH	C16H35NO2	3	0.73	28457-97-8	35703	42915.4	43619.5	71524.3	81397.6	111513	1.3606	0.0533212	0.159253	0.462261	-1.11322	down
MW0137300	Agathisflavone	Flavonoids	Flavones	C30H18O10	3	0.7299	28441-98-7	17199.3	16326.3	13161.6	38820.2	30572.1	23500.2	1.30781	0.0644775	0.18104	0.502594	-0.992534	insig
MW0142070	2,5-Diamino-6-hydroxy-4-(5-phosphoribosylamino)pyrimidine	Others	Others	C9H16N5O8P	3	0.7286	73477-63-1	4660.48	3571.63	1650.99	3641.22	1703.09	1668.31	0.546371	0.435412	0.608521	1.40933	0.49501	insig
MW0154886	Paniculatin	Lignans and Coumarins	Coumarins	C27H30O15	3	0.725	32361-88-9	554609	718979	593394	567065	579435	488945	0.823926	0.264791	0.453541	1.14157	0.191025	insig
MW0116659	1,3-dimethyl-1H-pyrazolo[3,4-b]pyridin-5-amine	Alcohol and amines	Amines	C8H10N4	3	0.7224	19736-04-0	217.76	268.51	48.39	287.95	264.06	896.25	0.906816	0.276013	0.465226	0.369174	-1.43763	insig
MW0154658	CID 91895359	Phenolic acids	Phenolic acids	C31H42O17	3	0.7217	39011-92-2	478.38	1029.41	491.72	862.25	522.24	616.38	0.113285	0.998391	0.99958	0.99932	-0.000980939	insig
MW0155616	Plaunol B	Others	Lactones	C20H20O6	3	0.7211	69749-00-4	4107.4	10473.7	12115.2	10302.6	7777.6	2520.58	0.404337	0.576952	0.720921	1.29589	0.373945	insig
MW0116680	4-Thiazolylacetonitrile	Heterocyclic compounds	Heterocyclic compounds	C5H4N2S	3	0.7208	7709-59-3	1.31643e+06	1.17672e+06	1.29469e+06	1.36535e+06	1.24893e+06	1.38311e+06	0.721809	0.312293	0.501577	0.947578	-0.0776834	insig
MW0147903	Keracyanin	Flavonoids	Anthocyanidins	C27H31ClO15	3	0.7206	18719-76-1	68893.7	65953.1	68056.1	65928.7	65769.6	40642.1	0.732576	0.348923	0.53585	1.17734	0.235529	insig
MW0052353	Digoxigenin	Steroids	Cardiac glycoside	C23H34O5	3	0.719	1672-46-4	236939	186858	178984	238888	165902	246305	0.320719	0.638127	0.768268	0.925795	-0.111235	insig
MW0117457	2-(o-Aminophenyl)-2H-benzotriazole	Benzene and substituted derivatives	Benzene and substituted derivatives	C12H10N4	3	0.717	1211-08-1	4983.22	5497.6	4373.47	2179.05	1813.91	2764.34	1.37813	0.00347973	0.0283886	2.19826	1.13636	up
MW0008687	N-[3-(dimethylamino)propyl]naphthalene-2-sulfonamide	Benzene and substituted derivatives	Benzene and substituted derivatives	C15H20N2O2S	3	0.7169	282720-12-1	8206.95	8348.69	6992.29	11262	11274.5	10755.5	1.38313	0.00918482	0.0523808	0.707316	-0.499573	insig
mws3108_N	2,4-Dihydroxypyrimidine-5-carboxylic acid	Nucleotides and derivatives	Nucleotides and derivatives	C5H4N2O4	3	0.7167	23945-44-0 | 59299-01-3 | 394-40-1 | 76821-79-9	1.15157e+06	1.1718e+06	1.05772e+06	2.00629e+06	1.9653e+06	2.03657e+06	1.44925	0.000133685	0.00540732	0.562751	-0.829432	insig
MW0063351	Methyl ricinoleate	FA	Others	C19H36O3	3	0.7165	141-24-2 | 41989-07-5	285321	177782	209918	212810	118160	116593	0.969145	0.170463	0.344861	1.50375	0.588564	insig
MW0117743	2,1,3-Benzothiadiazole-4-carbaldehyde	Benzene and substituted derivatives	Benzene and substituted derivatives	C7H4N2OS	3	0.7158	5170-68-3	56834.9	39402.5	38488.9	14135.4	8628.37	17544.7	1.35577	0.0208737	0.0869449	3.34238	1.74087	up
MEDP1228	Heterodendrin	Others	Others	C11H19NO6	3	0.7154	66465-22-3	16914.8	13790.1	14883.4	13525.6	14828.8	14894.2	0.508269	0.501236	0.661075	1.0541	0.0760125	insig
MW0063305	Radiclonic acid	Terpenoids	Ditepenoids	C23H40O5	3	0.7153	49620-14-6	331850	320606	313612	441450	385983	397188	1.36659	0.0276434	0.103393	0.788871	-0.342138	insig
MW0147243	Cassine	Alkaloids	Alkaloids	C18H35NO2	3	0.7151	5227-24-7	959.26	726.64	3352.44	1094.52	808.81	640.67	0.627462	0.426732	0.60134	1.98048	0.98585	insig
MW0155028	Pfaffic acid	Terpenoids	Triterpene	C29H44O3	3	0.7128	86432-14-6	3958.35	2056.72	965.19	5664.12	92.57	899.04	0.510157	0.959218	0.977646	1.04876	0.0686839	insig
MW0146529	Bakankoside	Steroids	Steroid	C16H23NO8	3	0.712	1398-17-0	585.5	21.73	195.71	1041.22	566.05	372.15	0.865222	0.207214	0.391782	0.405644	-1.30171	insig
MW0104799	Methyl 1-methyl-2-oxocyclopentanecarboxylate	Organic acids	Organic acids	C8H12O3	3	0.7113	30680-84-3	5093.68	6751.76	11942.3	8202.17	8483.43	13227.5	0.606793	0.482938	0.647733	0.795228	-0.33056	insig
MW0117181	1-Methylbenzoimidazol-5-amine	Benzene and substituted derivatives	Benzene and substituted derivatives	C8H9N3	3	0.7111	10394-38-4	2015.19	7947.23	3152.44	2431.5	5766.95	4144.73	0.0719751	0.908296	0.949507	1.06252	0.0874883	insig
MW0146438	Auricularine	Heterocyclic compounds	Heterocyclic compounds	C33H42N4	3	0.7102	73706-32-8	53800.4	59071.1	57005.4	1114.59	476.99	608.36	1.44943	0.000632918	0.0116526	77.2189	6.27088	up
MW0011404	Farnesylacetone	Others	Ketone compounds	C18H30O	3	0.7101	1117-52-8 | 762-29-8	4343.66	6580.39	9763.83	24099	23095.7	27255.3	1.37321	0.00109229	0.0149291	0.277876	-1.84749	down
MW0127533	1-(2-Adamantyl)-3-butylthiourea	Others	Others	C15H26N2S	3	0.7099	87170-66-9	6496.66	5511.05	6877.98	651.86	1802.58	1343.8	1.36916	0.00080436	0.0130127	4.97222	2.31389	up
MW0117708	2-(Hydroxymethyl)-6-methylpyridin-3-ol	Alkaloids	Pyridine alkaloids	C7H9NO2	3	0.7098	42097-42-7	28800.1	6496.8	26027.6	24456.8	26512.9	23555.2	0.536799	0.595637	0.736464	0.822872	-0.281259	insig
MW0148557	(Carboxymethyl)(dimethyl)sulfonium	Others	Lactones	C4H9O2S+	3	0.7096	24220-08-4	2.79643e+06	2.96611e+06	3.04755e+06	3.09327e+06	3.1914e+06	3.00343e+06	0.952713	0.163852	0.335668	0.948535	-0.0762276	insig
MW0145140	Anopterine	Others	Lactones	C31H43NO7	3	0.7079	38826-62-9	395.81	510.64	391	128.74	148.68	1088.78	0.444639	0.949119	0.972021	0.949678	-0.0744898	insig
MW0141853	Agecorynin C	Benzene and substituted derivatives	Benzene and substituted derivatives	C22H24O9	3	0.7057	70460-31-0	7106.77	15228	3894.6	7832.43	10634.3	18230.3	0.608369	0.489305	0.652622	0.714755	-0.484479	insig
MW0103202	Zygadenine	Alkaloids	Steroid alkaloids	C27H43NO7	3	0.7047	545-45-9	39876.6	31708.8	40275.3	57802.6	48671.4	54703.3	1.30217	0.013231	0.0651373	0.694022	-0.526946	insig
MW0150729	Hellicoside	Phenolic acids	Phenolic acids	C29H36O17	3	0.7046	132278-04-7	2942.47	1099.98	3327.02	3844.33	2812.09	6551.71	0.862211	0.225277	0.409521	0.55795	-0.841793	insig
MEDL00798	3-Hydroxyphenylurea	Benzene and substituted derivatives	Benzene and substituted derivatives	C7H8N2O2	3	0.7031	701-82-6	3208.38	3729.49	48761.1	143473	139975	43197.1	1.14223	0.0936455	0.233217	0.170518	-2.552	down
MW0160079	3-Hydroxy-2,4,5-trihydroxymethylpyridine	Alkaloids	Pyridine alkaloids	C8H11NO4	3	0.702	29712-70-7	74526.6	90339.9	79515.6	61252.5	69815.1	71975.8	1.13121	0.0804271	0.212296	1.2036	0.267351	insig
MW0120045	4,5-Dihydroxyimidazolidin-2-one	Others	Ketone compounds	C3H6N2O3	3	0.7	3720-97-6	108671	110394	129970	133769	114799	104345	0.0719213	0.912349	0.951524	0.989014	-0.0159373	insig
MW0116444	1-(4-Isopropylphenyl)-5-oxopyrrolidine-3-carboxylic acid	Organic acids	Organic acids	C14H17NO3	3	0.7	63674-51-1	7263.06	6281.3	3628.26	1146.52	733.33	9358.56	0.773016	0.564974	0.710979	1.52803	0.611672	insig
MW0140758	Taxol F	Others	Others	C48H53NO14	3	0.6986	173101-56-9	319.57	343.36	567.91	43.3	2060.98	1514.4	0.149887	0.316775	0.506037	0.340135	-1.55582	insig
MW0015225	7-oxo-11-Dodecenoic acid	Lipids	Free fatty acids	C12H20O3	3	0.6972	54921-60-7	1.54774e+06	1.44755e+06	1.62609e+06	1.63131e+06	1.69922e+06	1.54282e+06	0.760034	0.289684	0.47928	0.948297	-0.0765898	insig
MW0010239	Colchicine	Alkaloids	Alkaloids	C22H25NO6	3	0.6971	64-86-8 | 30512-31-3	86329.1	87735	81544	16871.6	21739.4	16707.9	1.44923	1.33642e-05	0.00207248	4.62062	2.20809	up
MW0147478	Cicutoxin	Alcohol and amines	Alcohols	C17H22O2	3	0.697	505-75-9	684003	697503	699029	659678	716549	704921	0.00773683	0.991856	0.996056	0.999706	-0.000424577	insig
MW0150279	Glutinosone	Terpenoids	Sesquiterpenoids	C14H20O2	3	0.6968	55051-94-0	486713	493215	462908	302979	538715	573195	0.202936	0.922899	0.958312	1.01975	0.028219	insig
MW0159452	Zhebeinine	Alkaloids	Alkaloids	C27H45NO3	3	0.6968	135636-54-3	3983.89	3816.64	3737.16	1957.46	443.22	596.62	1.26226	0.0252252	0.0979847	3.84936	1.94462	up
MW0153955	Montanin	Terpenoids	Ditepenoids	C32H48O8	3	0.6967	66583-55-9	2980.24	5434.36	7491.29	1560.53	7247.78	7411.58	0.153196	0.966514	0.981986	0.980641	-0.0282029	insig
MW0119782	3-Vinyl-1,2-dithiacyclohex-4-ene	Heterocyclic compounds	Heterocyclic compounds	C6H8S2	3	0.6959	62488-52-2	15249.9	13860.6	11589.2	4747.86	6089.15	11065.8	1.15202	0.0620074	0.176563	1.85819	0.893901	insig
MW0014324	4(5)-EpDPE methyl ester	Organic acids	Organic acids	C23H34O3	3	0.6958	121818-29-9	484988	505160	528198	1.04542e+06	1.01853e+06	1.19391e+06	1.44395	0.00647783	0.0423995	0.466057	-1.10142	down
MW0144228	Acanthifolicin	Organic acids	Organic acids	C44H68O13S	3	0.6953	77739-71-0	26602.8	14985.4	26609.3	39317	35810.5	38597.9	1.18936	0.050725	0.153777	0.599669	-0.737762	insig
MW0004424	2(1H)-Pyrimidinethione, 3,4-dihydro-1-(p-tolyl)-4,4,6-trimethyl-	Benzene and substituted derivatives	Benzene and substituted derivatives	C14H18N2S	3	0.6951	19017-40-4	384.58	420.29	320.69	539.18	486.32	2087.53	0.928436	0.334234	0.520756	0.361564	-1.46768	insig
MW0152837	Lycoricidine	Alkaloids	Isoquinoline alkaloids	C14H13NO6	3	0.6945	19622-83-4	234000	238962	243225	191014	200076	210123	1.38193	0.0092549	0.0526315	1.19124	0.25246	insig
MW0014548	4-Oxo-4-[(4-phenyloxan-4-yl)methylamino]butanoic acid	Organic acids	Organic acids	C16H21NO4	3	0.6945	6104-83-2	133.76	29.71	700.67	234.68	506.61	646.97	0.72722	0.517864	0.673992	0.622463	-0.683941	insig
MW0156616	Sennoside D	Benzene and substituted derivatives	Benzene and substituted derivatives	C42H40O19	3	0.6935	37271-17-3	1134.61	1280.5	2378.55	3011.14	452.93	2273.52	0.0419357	0.737512	0.837884	0.835483	-0.259317	insig
MW0142559	2'-Phospho-5'-adenylyl sulfate	Nucleotides and derivatives	Nucleotides and derivatives	C10H15N5O13P2S	3	0.6929	62230-89-1	41444.3	62325.1	95042.2	114175	144020	90318.5	1.07593	0.0860327	0.22151	0.570456	-0.809812	insig
MW0128343	(E)-Ethyl 3-(2-cyanophenyl)acrylate	Others	Lactones	C12H11NO2	3	0.6924	223567-59-7	18255.6	23333.1	20953	19351.6	22325.5	20810.7	0.0219558	0.9922	0.996153	1.00086	0.00124158	insig
MW0138770	Licochalcone a	Flavonoids	Chalcones	C21H22O4	3	0.6921	58749-22-7	442.51	3614.93	2707.99	198.57	36229.8	34145.9	0.499877	0.209501	0.395093	0.0958625	-3.38289	insig
MW0126471	8-Demethyl-8-(dimethylamino)riboflavin	Heterocyclic compounds	Heterocyclic compounds	C18H23N5O6	3	0.6894	51093-55-1	110641	116256	109072	99211	76042.6	116504	0.768271	0.33494	0.521621	1.15153	0.203556	insig
MW0003256	2-Methylbenzhydrol	Benzene and substituted derivatives	Benzene and substituted derivatives	C14H14O	3	0.6893	5472-13-9	6167.69	4712.4	2424.46	7690.24	5368.22	9626.31	0.967105	0.130964	0.290614	0.586497	-0.769804	insig
MW0017134	cis-11-Methyl-2-dodecenoic acid	Lipids	Free fatty acids	C13H24O2	3	0.6883	677354-23-3	671.12	852.2	545.27	252.84	670.25	145.23	0.981529	0.162535	0.333847	1.9363	0.953304	insig
MEDL00543	3-Methyladipic acid	Organic acids	Organic acids	C7H12O4	3	0.6877	3058-01-3 | 61898-58-6	4010.11	4442.38	6700.04	2387	3228.04	5513.55	0.743241	0.34515	0.5316	1.36159	0.445288	insig
MW0002290	2,4-Di-tert-butyl-6-dimethylaminomethyl-phenol	Benzene and substituted derivatives	Benzene and substituted derivatives	C17H29NO	3	0.6866	32857-07-1	924.34	617.72	722.79	751.64	824.51	595.76	0.176683	0.797592	0.879861	1.04279	0.0604512	insig
MW0105949	Aspartylglutamate	Amino acids and derivatives	Amino acids and derivatives	C9H14N2O7	3	0.6857	6157-06-8	64659.7	38699.8	28595.3	102168	91597.8	89134.1	1.25609	0.0305677	0.110585	0.466436	-1.10025	down
MW0108619	N-Acetyl-D-phenylalanine	Amino acids and derivatives	Amino acids and derivatives	C11H13NO3	3	0.685	10172-89-1	3249.15	3710.69	6041.02	257.41	2452.65	3505.09	0.831639	0.154917	0.323203	2.0918	1.06475	insig
MW0008432	4-methyl-N-(naphthalen-1-yl)thiazol-2-amine	Benzene and substituted derivatives	Benzene and substituted derivatives	C14H12N2S	3	0.6847	1957-01-3	282.42	27.91	144.51	2831.53	370.26	83.8	0.740042	0.392376	0.576801	0.138435	-2.85272	insig
MW0148193	Decuroside III	Lignans and Coumarins	Coumarins	C26H34O14	3	0.6842	96638-81-2	59.78	369.6	164.17	580.33	326.5	596.44	1.04128	0.0742197	0.199902	0.394839	-1.34066	down
MW0157436	4-[2,2-Bis(diethoxyphosphoryl)ethenyl]-2,6-ditert-butylphenol	Organic acids	Organic acids	C24H42O7P2	3	0.6842	126411-39-0	2476.59	346.92	229.74	1859.96	103.68	972.77	0.0112874	0.967397	0.98201	1.03979	0.0562923	insig
MW0144266	Acetylatractylodinol	Others	Lactones	C15H12O3	3	0.684	61582-39-6	170722	197041	171239	151369	189777	146277	0.709707	0.359664	0.547232	1.10582	0.145117	insig
MW0119131	3-methylsulfanyl-4-oxo-6,7-dihydro-5H-2-benzothiophene-1-carboxylic acid	Organic acids	Organic acids	C10H10O3S2	3	0.6838	168279-58-1	13838.3	15077.1	17647.1	19215.6	7182.49	34288.8	0.131311	0.610456	0.747452	0.767258	-0.382216	insig
MW0001927	2-[(4-Hydroxy-3,5-dimethoxyphenyl)methylidene]propanedinitrile	Phenolic acids	Phenolic acids	C12H10N2O3	3	0.6835	59832-13-2	1898.15	5527.98	673.52	2920.19	860.93	2447.84	0.0473424	0.722932	0.827146	1.30032	0.378868	insig
MEDN1197	8-Methoxyalkynurate	Organic acids	Organic acids	C11H9NO4	3	0.6826	2929-14-8	1288.33	6168.93	2157.46	1991.26	2107.96	3558.26	0.0676546	0.714037	0.819994	1.2556	0.328375	insig
MW0007527	Lucidin	Quinones	Anthraquinone	C15H10O5	3	0.6819	478-08-0	64.14	36	75.03	28.76	145.5	3.42	0.5118	0.986747	0.993151	0.985873	-0.0205256	insig
MW0052512	cis-5,8,11,14,17-Eicosapentaenoic acid methyl ester	FA	Others	C21H32O2	3	0.6818	2734-47-6	100333	107229	102600	122002	121637	123199	1.41968	0.00857354	0.0506013	0.845504	-0.242117	insig
MW0114576	Helicide	Phenolic acids	Phenolic acids	C13H16O7	3	0.6816	80154-34-3	177549	156347	157708	265567	248441	245674	1.42526	0.000673161	0.0119043	0.647118	-0.627899	insig
MW0118122	2-[1-(2-hydroxybenzyl)-1H-benzimidazol-2-yl]phenol	Benzene and substituted derivatives	Benzene and substituted derivatives	C20H16N2O2	3	0.6815	85573-12-2	8750.73	9605.98	11615.9	13193.1	10926.2	9842.47	0.674024	0.366092	0.553254	0.882538	-0.18027	insig
MW0147892	cyanidin 3-O-(6-O-glucosyl-2-O-xylosylgalactoside)	Flavonoids	Anthocyanidins	C32H39O20+	3	0.6815	60029-67-6	419910	419532	425941	459165	444218	416761	0.852896	0.277891	0.466856	0.958519	-0.0611211	insig
MW0011966	1,8-Octanediol	Alcohol and amines	Alcohols	C8H18O2	3	0.6814	629-41-4 | 31762-64-8	5740.66	4892.1	5472.45	6902.07	9134.77	6743.81	1.22945	0.0905239	0.228835	0.706969	-0.500281	insig
MW0156499	Salannin	Terpenoids	Triterpene	C34H44O9	3	0.6811	992-20-1	24171	23178.1	22806.6	36201.2	33320.1	30556	1.39965	0.0205092	0.0858704	0.701016	-0.512481	insig
MW0016022	Azadiradione	Terpenoids	Triterpene	C28H34O5	3	0.6792	26241-51-0	34287.7	664.79	32728.6	24331.5	824.02	39034.1	0.00637424	0.944172	0.96843	1.05439	0.0764129	insig
MW0009686	Rivenprost	Benzene and substituted derivatives	Benzene and substituted derivatives	C24H34O6S	3	0.6785	256382-08-8	84733.1	84905.9	84170.1	78208.4	67489.7	65907.7	1.26212	0.0673778	0.185819	1.19944	0.262364	insig
MW0160340	2,2,6,6-Tetramethyl-1,3-dithiane-4-thione	Others	Ketone compounds	C8H14S3	3	0.6783	57274-32-5	19309.5	24216.4	20459.5	22793.1	26532.3	32846.4	1.01439	0.163617	0.335556	0.778678	-0.3609	insig
MW0155643	Podorhizol beta-D-glucoside	Lignans and Coumarins	Lignans	C28H34O13	3	0.6776	17187-73-4	136.88	1379.35	1948.71	343.81	885.03	78.34	0.561978	0.313523	0.502834	2.6507	1.40637	insig
MW0154876	Pancratistatin	Alkaloids	Alkaloids	C14H15NO8	3	0.6771	96203-70-2	1290.69	133.64	161.2	15.2	2573.07	1092.63	0.0601297	0.463862	0.63271	0.430745	-1.21509	insig
MW0103939	Hydroxyisoleucine	Amino acids and derivatives	Amino acids and derivatives	C6H13NO3	3	0.6764	55399-93-4 | 50764-07-3	164613	158633	162725	115624	107222	108968	1.44625	0.000173786	0.00609307	1.46459	0.550492	insig
ZINC36383810	Acuminaminoside	Heterocyclic compounds	Heterocyclic compounds	C22H23NO8	3	0.6764	769954-40-7	1868.91	1340.5	2811.49	532.57	1866.99	657.14	0.972208	0.177857	0.354307	1.96974	0.978004	insig
MW0111615	1-(3,4-Dimethoxyphenyl)propan-1-one	Others	Ketone compounds	C11H14O3	3	0.6757	1835-04-7	65067.5	68083.1	86902.8	81431.3	62880	69279.1	0.168517	0.817871	0.892706	1.03026	0.0430073	insig
MW0006211	Benzenesulfonimidic acid	Benzene and substituted derivatives	Benzene and substituted derivatives	C6H7NO2S	3	0.6755	4388-24-3	3354.46	5594.01	8577.3	5117.41	7258	12830.9	0.625563	0.412486	0.591901	0.695293	-0.524308	insig
MW0145042	Amphibine B	Benzene and substituted derivatives	Benzene and substituted derivatives	C39H47N5O5	3	0.6755	38541-74-1	1726.53	3182.36	1736.65	2285.03	1935.7	2792.26	0.269121	0.836314	0.903542	0.947604	-0.0776432	insig
MW0105592	alpha-Amanitine	Heterocyclic compounds	Heterocyclic compounds	C39H54N10O14S	3	0.6754	23109-05-9	619.32	748	1223.34	175.49	56.07	771.37	0.985068	0.141929	0.305044	2.58309	1.3691	insig
MW0107974	Lupulone	Others	Others	C26H38O4	3	0.6739	468-28-0	102890	98636.6	88065.2	94627	85474.1	129717	0.285264	0.674071	0.791605	0.934716	-0.0973997	insig
MW0137633	Chalepensin	Heterocyclic compounds	Heterocyclic compounds	C16H14O3	3	0.6731	13164-03-9	368.33	3126.43	361.15	1129.49	319.98	370.63	0.32793	0.542772	0.693427	2.11852	1.08305	insig
MW0154151	N(2)-malonyl-D-tryptophan	Amino acids and derivatives	Amino acids and derivatives	C14H14N2O5	3	0.6715	3184-74-5	9264.77	4989.18	225.18	9093.17	7870.44	7776.7	0.728153	0.319641	0.508284	0.585244	-0.772889	insig
MW0123963	Ethyl 3-amino-5-nitrothieno[2,3-b]pyridine-2-carboxylate	Others	Lactones	C10H9N3O4S	3	0.671	52505-43-8	811475	719205	868232	800283	743554	837787	0.0607395	0.916984	0.954694	1.00726	0.0104347	insig
MW0128015	Epiafzelechin trimethyl ether	Benzene and substituted derivatives	Benzene and substituted derivatives	C18H20O5	3	0.6708	3143-21-3	111.3	1612.71	17.11	247.98	6301.52	254.77	0.627821	0.494026	0.655494	0.255886	-1.96642	insig
MW0122505	7-Methoxy-4H-chromen-4-one	Others	Ketone compounds	C10H8O3	3	0.6696	5751-52-0	41666.3	44340.2	46800.5	32071.6	27242.3	25230.3	1.37973	0.00412035	0.0319485	1.57086	0.651555	insig
MW0154873	(1R,6R,11S,13S,14R,21R)-7,19,23-triazahexacyclo[9.9.1.11,13.12,6.07,21.014,19]tricosane	Alkaloids	Alkaloids	C20H33N3	3	0.6695	2448-27-3	96.35	3933.7	28.61	2710.21	2372.14	432.18	0.731549	0.762744	0.857829	0.735994	-0.442234	insig
MW0000171	Catharanthine	Alkaloids	Plumerane	C21H24N2O2	3	0.669	2468-21-5	15967.1	17812.9	15372.3	241285	224588	219849	1.45779	0.000821939	0.0130127	0.0716796	-3.80229	down
MW0136956	7-Diethylamino-3-phenylcoumarin	Lignans and Coumarins	Coumarins	C19H19NO2	3	0.6686	84865-19-0	602.87	2371.28	160.4	777.88	2084.42	2243.24	0.695519	0.473035	0.640026	0.613951	-0.703805	insig
MW0136999	7-hydroxy-3-(2-methoxyphenyl)-4H-chromen-4-one	Flavonoids	Isoflavones	C16H12O4	3	0.6686	63909-40-0	1.23952e+06	1.18968e+06	1.16177e+06	1.41418e+06	237496	1.23788e+06	0.5551	0.588935	0.730201	1.24274	0.313524	insig
MW0000198	Corynoline	Alkaloids	Isoquinoline alkaloids	C21H21NO5	3	0.6684	18797-79-0 | 68035-45-0	47.09	8.94	99.93	146.59	7143.82	61.85	0.877638	0.414199	0.592006	0.0212125	-5.55894	insig
MW0157364	Taxodone	Terpenoids	Ditepenoids	C20H28O3	3	0.667	19039-02-2	19114.5	6006	3748.75	39915.9	52257.3	41776.6	1.2757	0.00536333	0.0378058	0.215523	-2.21409	down
MW0007080	Ethyl 4-hydroxy-3,5-dimethoxybenzoate	Benzene and substituted derivatives	Benzene and substituted derivatives	C11H14O5	3	0.6667	3943-80-4	25659.5	26191.8	9291.46	8572.62	10515.3	17465.5	0.723568	0.278911	0.467853	1.6727	0.742176	insig
MW0127242	2-[(4-Methylbenzyl)sulfanyl]aniline	Benzene and substituted derivatives	Benzene and substituted derivatives	C14H15NS	3	0.6656	136620-24-1	1921.37	3823.16	7712.35	3560.43	7026.11	1072.48	0.262432	0.817038	0.892522	1.1542	0.206897	insig
MW0116170	s-Triazolo(3,4-b)benzothiazole-3-thiol	Benzene and substituted derivatives	Benzene and substituted derivatives	C8H5N3S2	3	0.6651	6957-85-3	22255.4	21458.7	18132.8	6861.7	19945.1	21545.1	0.630426	0.438116	0.610817	1.2791	0.355125	insig
FDATN00279	Morin hydrate	Flavonoids	Flavonols	C15H12O8	3	0.6645	654055-01-3 | 6202-27-3	335084	308460	329810	580293	462660	507577	1.39531	0.0251277	0.0977941	0.627756	-0.671724	insig
MW0148467	3,3'-(6,6'-Dihydroxy-5,5'-dimethoxy[1,1'-biphenyl]-3,3'-diyl)di(prop-2-enoic acid)	Benzene and substituted derivatives	Benzene and substituted derivatives	C20H18O8	3	0.6638	436-96-4 | 60299-54-9	219181	241747	240024	247706	228651	230660	0.160255	0.841212	0.905808	0.991421	-0.0124309	insig
MW0169544	omega-Aminoarginine	Amino acids and derivatives	Amino acids and derivatives	C6H15N5O2	3	0.6638	57444-72-1	7318.65	9622.97	9441.28	10626.5	11488.7	9599.8	0.989293	0.131494	0.291311	0.831875	-0.265562	insig
MW0140705	(-)-Berbine	Alkaloids	Alkaloids	C17H17N	3	0.6637	131-10-2	6926.84	7810.32	6494.05	8910.92	11518.8	3236.5	0.034635	0.772813	0.862436	0.897111	-0.156641	insig
MW0151762	Ipolamiide	Heterocyclic compounds	Heterocyclic compounds	C17H26O11	3	0.6633	27934-98-1	11711.1	6778.29	10713.1	13079.7	13289.2	10515.7	0.82679	0.232842	0.417596	0.791725	-0.336929	insig
MW0137868	Daphnin	Lignans and Coumarins	Coumarins	C15H16O9	3	0.6632	486-55-5	10404.2	4591.3	6331.46	9569.37	12482.7	13674.4	1.06934	0.0926668	0.232503	0.596951	-0.744317	insig
MW0110425	Val-Thr	Amino acids and derivatives	Amino acids and derivatives	C9H18N2O4	3	0.6625	72636-02-3	428974	122796	287767	651133	575846	592233	1.1234	0.0582112	0.168883	0.461483	-1.11565	down
MW0007508	Liranaftate	Benzene and substituted derivatives	Benzene and substituted derivatives	C18H20N2O2S	3	0.662	88678-31-3	7684.5	6913.29	9289.89	7378.38	5538.48	4600.47	1.02691	0.12108	0.2777	1.36366	0.447484	insig
MW0143663	5-Methylthiopentanaldoxime	Alcohol and amines	Alcohols	C6H13NOS	3	0.6613	32377-75-6	3378.62	1330.71	5907.58	6980.52	3356.92	4453.94	0.621771	0.461791	0.630739	0.717777	-0.478393	insig
MW0001477	1-[(4-Dimethylaminophenyl)methylamino]propan-2-ol	Benzene and substituted derivatives	Benzene and substituted derivatives	C12H20N2O	3	0.6612	7467-44-9	6809.94	473.93	3978.48	2776.54	1882.86	3608.67	0.111721	0.64562	0.774053	1.36215	0.445885	insig
MW0000797	(R)-Benzyl 2-hydroxy-2-phenylacetate	Benzene and substituted derivatives	Benzene and substituted derivatives	C15H14O3	3	0.6612	97415-09-3	1258.47	1757.37	1982.79	4360.32	3912.59	3042.65	1.34544	0.0160767	0.0742514	0.441748	-1.1787	down
MW0105602	Amastatin	Amino acids and derivatives	Amino acids and derivatives	C21H38N4O8	3	0.6598	67655-94-1	3354.7	201.76	1558.03	374.49	424.51	789.75	0.550651	0.326359	0.512813	3.21919	1.6867	insig
MW0137756	Tricoumaroyl spermidine	Heterocyclic compounds	Heterocyclic compounds	C34H37N3O6	3	0.6597	131086-78-7 | 364368-18-3	1156.58	1195.85	1230.96	1086.92	24.25	24.76	1.05047	0.147281	0.313206	3.15459	1.65745	up
MW0147227	Cascaroside B	Steroids	Steroid	C27H32O14	3	0.6594	53861-34-0	8876.62	16098.3	22231.5	13546.6	15929.4	24883.8	0.379816	0.669327	0.789104	0.868406	-0.203559	insig
MW0104891	3-(Methylsulfonyl)propyl methanesulfonate	Organic acids	Organic acids	C5H12O5S2	3	0.6586	357913-53-2	123.3	3753.6	1845.19	876.4	1496.53	790.35	0.0445806	0.503562	0.662381	1.80891	0.855121	insig
MW0143733	6-(Isopropylthio)purine	Heterocyclic compounds	Heterocyclic compounds	C8H10N4S	3	0.6585	5443-87-8	17787.4	20424.4	16604.6	14740.2	29902	20867	0.457405	0.506759	0.665093	0.836775	-0.257088	insig
MW0012411	15(S)-Hpepe	Lipids	Free fatty acids	C20H30O4	3	0.658	125992-60-1	119626	118064	208008	2.47466e+06	2.25398e+06	2.3195e+06	1.44588	0.000129785	0.00540732	0.0632362	-3.98311	down
MW0005061	4-Hydroxy-3-methoxyphenylacetone	Phenolic acids	Phenolic acids	C10H12O3	3	0.6547	2503-46-0	20675.8	7122.36	19580.3	22806	21090.3	17962	0.670444	0.384946	0.570626	0.765919	-0.384737	insig
MW0012312	9s,13r-12-Oxophytodienoic Acid	Lipids	Free fatty acids	C18H28O3	3	0.6546	71606-07-0 | 67204-66-4	30837.2	28473.4	29210.3	845355	767693	778037	1.45855	0.000996371	0.0142268	0.0370212	-4.7555	down
MW0138962	Micromelin	Others	Lactones	C15H12O6	3	0.6534	15085-71-9	17494.4	36939.3	30746.2	38323.5	13339.2	41365.2	0.034959	0.818647	0.89307	0.915638	-0.127151	insig
Lmmn001294	Koaburaside	Phenolic acids	Phenolic acids	C14H20O9	3	0.6526	41653-73-0	28212.1	20936.3	21851.3	20830.9	21806.8	12921.1	0.82505	0.231621	0.416546	1.27792	0.353799	insig
MW0007415	Isofenphos-methyl	Benzene and substituted derivatives	Benzene and substituted derivatives	C14H22NO4PS	3	0.6525	99675-03-3 | 83542-84-1	317.51	371.67	548.58	654.22	36.6	231.06	0.629006	0.632742	0.764066	1.34265	0.425081	insig
MW0157031	Ser-Tyr	Amino acids and derivatives	Amino acids and derivatives	C12H16N2O5	3	0.6524	21435-27-8	4764.83	1057.39	5487.76	3339.74	1254.66	5087.78	0.0941566	0.77435	0.863435	1.16812	0.224193	insig
MW0150170	Glu-Thr-Tyr	Amino acids and derivatives	Amino acids and derivatives	C18H25N3O8	3	0.652	110642-78-9	177756	150208	154999	78184	76577.3	69436.7	1.43941	0.00562706	0.0391178	2.15418	1.10714	up
MW0143603	5'-Deoxyinosine	Nucleotides and derivatives	Nucleotides and derivatives	C10H12N4O4	3	0.652	69655-07-8	92807.3	99716.1	82326.9	146805	143681	161820	1.40939	0.00149023	0.0176663	0.607665	-0.718652	insig
MW0129649	1,2-di-O-sinapoyl-beta-D-glucose	Phenolic acids	Phenolic acids	C28H32O14	3	0.6514	91095-79-3	128.21	436.15	71.23	850.51	78.35	326.56	0.448686	0.477142	0.642982	0.506277	-0.982002	insig
FDATN01334	Dioxybenzone	Benzene and substituted derivatives	Benzene and substituted derivatives	C14H12O4	3	0.6511	131-53-3	71991.1	49936	64294.6	105811	87770	86129.4	1.24466	0.0260443	0.09982	0.665767	-0.58691	insig
MW0138085	Epimedin C	Flavonoids	Flavonols	C39H50O19	3	0.651	110642-44-9	656.45	525.8	745.11	359.34	496.74	652.72	0.802324	0.263526	0.451567	1.27741	0.353224	insig
MW0152116	Lankamycin	Heterocyclic compounds	Heterocyclic compounds	C42H72O16	3	0.6507	30042-37-6	40904.6	35735.4	43051.7	10793.2	9214.99	9685.14	1.45111	0.0038021	0.0302368	4.03093	2.01111	up
MW0124613	Kadsurin A	Heterocyclic compounds	Heterocyclic compounds	C21H24O6	3	0.6503	99340-07-5	50239.5	45773.4	43567.4	33453.1	60667.4	34409	0.423071	0.722575	0.826981	1.08598	0.118996	insig
MW0013716	Chimyl alcohol	GL	MG	C19H40O3	3	0.6493	6145-69-3 | 53584-29-5	115248	125325	175227	142636	153538	180311	0.662575	0.413737	0.592006	0.872642	-0.196538	insig
MEDP2243	N-(5Z,8Z,11Z,14Z)-5,8,11,14-eicosatetraen-1-yl-4-hydroxybenzamide	Benzene and substituted derivatives	Benzene and substituted derivatives	C27H39NO2	3	0.648	251908-92-6	16239.9	14592.4	17195.8	15720.5	14851.4	27265.6	0.509106	0.501357	0.661075	0.830399	-0.268123	insig
MW0157343	Tarennoside	Terpenoids	Terpene	C16H22O9	3	0.6467	61081-59-2	21745.7	43073.1	22002.8	52258.8	51522.9	47966.1	1.17064	0.0873827	0.223738	0.572143	-0.805551	insig
MW0140300	(2S)-2-(benzenesulfonamido)-3-[[2-(4-piperidin-4-ylpiperidin-1-yl)-4-propan-2-yl-1,3-thiazole-5-carbonyl]amino]propanoic acid	Benzene and substituted derivatives	Benzene and substituted derivatives	C26H37N5O5S2	3	0.6466	718595-27-8	1334.76	450.58	1158.41	7047.26	5400.16	5199.44	1.36563	0.00587548	0.0402206	0.166814	-2.58368	down
MW0151985	Kaempferol 3-O-beta-D-glucosylgalactoside	Flavonoids	Flavonols	C27H30O16	3	0.6465	31512-06-8	2.17338e+07	1.99724e+07	2.20556e+07	2.93121e+07	3.03546e+07	3.02806e+07	1.43315	0.00124819	0.0163932	0.708879	-0.49639	insig
MW0142497	Naphthyl-2-methyl-succinic acid	Benzene and substituted derivatives	Benzene and substituted derivatives	C15H14O4	3	0.6461	350044-88-1	147.4	146.27	352.1	263.69	148.34	266.15	0.217079	0.899066	0.944023	0.95221	-0.0706478	insig
MW0143168	4-(tert-butyl)phenyl benzoate	Benzene and substituted derivatives	Benzene and substituted derivatives	C17H18O2	3	0.6459	14041-81-7	1.13174e+06	1.12756e+06	1.13173e+06	1.69242e+06	1.66971e+06	1.63203e+06	1.45673	0.00101871	0.0143616	0.678998	-0.558521	insig
MEDP2112	2-Phenylbutyramide	Benzene and substituted derivatives	Benzene and substituted derivatives	C10H13NO	3	0.6448	90-26-6	110181	42978.8	52393.9	54267.2	115803	107506	0.594147	0.44752	0.619218	0.74053	-0.433369	insig
MW0168432	1,2-bis(heptanoylthio) Glycerophosphocholine	GP	PC	C22H44NO6PS2	3	0.6443	89019-63-6	67539.8	66657.6	64401.3	59965.5	60585	60069	1.39474	0.0199602	0.0846071	1.09954	0.136903	insig
MW0152120	Lappaconitine	Alkaloids	Terpenoid alkaloids	C32H44N2O8	3	0.6439	32854-75-4	140558	116539	116811	136254	146269	146437	1.06032	0.134088	0.294316	0.871664	-0.198156	insig
MW0151244	Hydrocortisone sodium succinate	Others	Lactones	C25H33NaO8	3	0.6439	125-04-2	1495.52	1545.28	224.82	1779.34	129.1	1720.4	0.0622095	0.870002	0.926956	0.899907	-0.152152	insig
MW0154580	N-Octadecyl-N'-propyl-sulfamide	Alcohol and amines	Amines	C21H46N2O2S	3	0.6432	925891-74-3	240.37	169	2764.56	1996.6	3133.5	4155.97	1.03364	0.132747	0.292463	0.341795	-1.5488	down
MEDL00354	Gly-Leu-Ala	Amino acids and derivatives	Amino acids and derivatives	C11H21N3O4	3	0.6405	32557-24-7	386.58	66.53	23.22	1187.24	678.07	747.42	1.17968	0.0262035	0.10024	0.182311	-2.45552	down
MEDN1520	Aleuritic acid	Lipids	Free fatty acids	C16H32O5	3	0.64	6949-98-0 | 533-87-9 | 18951-77-4	18147.3	14652.8	15486.7	8587.88	10186.7	6703.7	1.34369	0.00647667	0.0423995	1.89521	0.922358	insig
MW0157471	Thalicoside A	Terpenoids	Triterpene	C42H70O14	3	0.6396	93208-45-8	5977.52	1219.3	2657.64	2017.2	7154.64	2582.01	0.26095	0.78351	0.869055	0.838403	-0.254285	insig
MW0007023	Ethyl 2,4-dihydroxy-6-methylbenzoate	Phenolic acids	Phenolic acids	C10H12O4	3	0.6395	2524-37-0	1.17621e+06	1.18404e+06	1.20693e+06	1.23665e+06	1.13089e+06	1.19195e+06	0.0748381	0.942518	0.967719	1.00216	0.00311043	insig
MW0116539	1,2-Benzisothiazol-3-amine 1,1-dioxide	Benzene and substituted derivatives	Benzene and substituted derivatives	C7H6N2O2S	3	0.6395	7668-28-2	2045.42	3976.44	6651.8	5551.76	7563.55	4430.56	0.702482	0.379517	0.566326	0.722316	-0.469298	insig
MW0141981	2,3,6-Trihydroxypyridine	Alkaloids	Pyridine alkaloids	C5H5NO3	3	0.6389	39954-19-3	404773	444842	372435	450596	454569	453392	1.05916	0.161489	0.332716	0.899521	-0.15277	insig
MW0143363	3,4-Dihydroxybenzyl alcohol	Phenolic acids	Phenolic acids	C7H8O3	3	0.6387	3897-89-0	537.33	880.29	57.45	2992.67	1930.4	52.33	0.369673	0.306031	0.494389	0.296473	-1.75403	insig
MW0147037	Cammaconine	Alkaloids	Terpenoid alkaloids	C23H37NO5	3	0.6364	32152-70-8	31094.3	45985.5	41874.1	9991.82	20562.8	36570.6	0.963215	0.142365	0.305652	1.77212	0.825476	insig
MW0108481	N-(tert-Butoxycarbonyl)-L-leucine	Amino acids and derivatives	Amino acids and derivatives	C11H21NO4	3	0.6362	13139-15-6 | 53296-34-7	668673	692052	705573	774042	808088	775152	1.38948	0.00335694	0.0277929	0.87656	-0.190076	insig
MW0008027	N-(2-Ethoxyphenyl)naphthalene-2-carboxamide	Benzene and substituted derivatives	Benzene and substituted derivatives	C19H17NO2	3	0.636	4711-67-5	4975.59	3217.49	1303.47	5856.58	10184	6992.68	1.10879	0.0566118	0.165645	0.412297	-1.27824	down
MW0107779	Leu-Asn	Amino acids and derivatives	Amino acids and derivatives	C10H19N3O4	3	0.6355	14608-81-2	2003.09	1135.65	449.61	3180.73	2835.14	1182.81	0.859469	0.196407	0.377282	0.498473	-1.00441	insig
MW0154811	Oxolucidine B	Heterocyclic compounds	Heterocyclic compounds	C30H49N3O2	3	0.6355	71384-25-3	4873.04	3545.06	1259.56	564.67	176.75	319.77	1.31243	0.111004	0.260974	9.11963	3.18898	up
MW0117507	2-(3,5-dimethyl-1H-pyrazol-1-yl)acetohydrazide	Alcohol and amines	Amines	C7H12N4O	3	0.634	64019-58-5	4711.48	13021.3	17334.7	9580.88	8068.75	15384.9	0.0618251	0.884616	0.934744	1.06154	0.0861572	insig
MW0115421	Triethylene glycol	Alcohol and amines	Alcohols	C6H14O4	3	0.6338	112-27-6 | 119438-10-7 | 103734-98-1 | 122784-99-0 | 137800-98-7 | 145112-98-7	100.2	1372.5	513.38	16856.5	15189.2	16760.1	1.34695	4.73728e-05	0.00328668	0.0406936	-4.61906	down
MW0154259	Nagilactone C	Terpenoids	Terpene	C19H22O7	3	0.6328	24338-53-2	5949	4202.36	10170.9	4927.8	2957.59	5206.58	0.788299	0.307128	0.495406	1.55227	0.634381	insig
MW0005909	9,10-Phenanthrenequinone	Benzene and substituted derivatives	Benzene and substituted derivatives	C14H8O2	3	0.6326	84-11-7	87943.3	89647.6	74651.7	96978.2	98023.9	61312.9	0.014309	0.924138	0.959353	0.984111	-0.0231066	insig
MW0142666	Anhydrovinblastine	Alkaloids	Plumerane	C46H56N4O8	3	0.6326	38390-45-3	40446.2	76316.1	42454	54819.7	49235.8	59343.3	0.228123	0.917046	0.954694	0.974404	-0.0374085	insig
MW0061611	Phorbol 12-myristate 13-acetate	Heterocyclic compounds	Heterocyclic compounds	C36H56O8	3	0.6316	16561-29-8 | 11016-13-0	147101	120678	116896	636745	190425	195708	1.03365	0.286701	0.475907	0.376071	-1.41092	down
MW0160125	Bisucaberin	Others	Ketone compounds	C18H32N4O6	3	0.6306	112972-60-8	44.95	872.9	179.78	88.23	1083.06	946.27	0.493948	0.448387	0.619592	0.518347	-0.948011	insig
MW0011993	10-Deacetylbaccatin III	Benzene and substituted derivatives	Benzene and substituted derivatives	C29H36O10	3	0.6303	32981-86-5	1901.04	3867.32	4566.03	219.17	1035.89	59.94	1.21432	0.0496515	0.151717	7.85885	2.97432	up
MW0006091	Atipamezole	Benzene and substituted derivatives	Benzene and substituted derivatives	C14H16N2	3	0.6302	104054-27-5 | 308081-08-5	58695.6	63499	63412.2	132897	125851	108187	1.43147	0.0115951	0.0604024	0.50583	-0.983276	insig
MW0168623	4-phenyl-5-methyl-1,2,3-Thiadiazole	Benzene and substituted derivatives	Benzene and substituted derivatives	C9H8N2S	3	0.63	64273-28-5	8478.53	14956.9	7544.35	12043.4	9260.62	10888.5	0.253672	0.882264	0.933181	0.962327	-0.0554008	insig
MEDP1218	3-Amino-2-naphthoic acid	Alkaloids	Alkaloids	C11H9NO2	3	0.6292	5959-52-4	42752.6	27804.9	41268.1	62289.8	37624.3	56513.9	0.910949	0.180272	0.357529	0.71487	-0.484248	insig
MW0008211	N-(3-hydroxyphenyl)-Arachidonoyl amide	Benzene and substituted derivatives	Benzene and substituted derivatives	C26H37NO2	3	0.6292	183718-75-4	114344	101776	97943.1	171924	113486	117246	0.926125	0.254874	0.441811	0.77998	-0.358492	insig
MW0155063	Phaseic acid	Terpenoids	Sesquiterpenoids	C15H20O5	3	0.6278	24394-14-7	2400.4	1612.76	1615.32	2488.86	1562.02	2748.12	0.550958	0.434747	0.608013	0.827839	-0.272577	insig
MW0126007	Oxolinic acid	Organic acids	Organic acids	C13H11NO5	3	0.6261	14698-29-4	606.71	176.8	253.42	2607.71	2407.78	2913.11	1.3808	0.00033327	0.00845123	0.130783	-2.93475	down
MW0105376	7-Aminodesacetoxycephalosporanic acid	Organic acids	Organic acids	C8H10N2O3S	3	0.6258	22252-43-3 | 70287-30-8	18663.1	2898.15	11243.8	60993.6	52935.4	36363	1.21896	0.0152143	0.070836	0.218275	-2.19578	down
MW0000065	16-Hydroxytabersonine	Alkaloids	Plumerane	C21H24N2O3	3	0.6257	22149-28-6	15894.4	13453	14948.7	24113	14125.7	17530.3	0.785981	0.320894	0.508787	0.794276	-0.332287	insig
MW0142444	2-Isoprenylemodin	Benzene and substituted derivatives	Benzene and substituted derivatives	C20H18O5	3	0.6242	82345-58-2	42315.9	41259.6	33962.7	25553	43440.7	47312.3	0.143214	0.958595	0.977258	1.01059	0.0152021	insig
MW0053847	Hellebrin	Heterocyclic compounds	Heterocyclic compounds	C36H52O15	3	0.6237	13289-18-4	33.32	303.62	294.18	237.01	264.26	317.82	0.576592	0.557115	0.704625	0.770514	-0.376108	insig
MW0000810	1,1'-Bi-2-naphthol	Benzene and substituted derivatives	Benzene and substituted derivatives	C20H14O2	3	0.6232	18531-94-7 | 602-09-5 | 18531-99-2	338.67	381.08	23328.2	73845.4	66836.7	68308.8	1.18509	0.0106019	0.0574554	0.115067	-3.11945	down
MW0104847	(2S)-2-amino-4-phosphonobutanoic acid	Organic acids	Organic acids	C4H10NO5P	3	0.6232	23052-81-5 | 145236-29-9	2.49868e+06	2.5005e+06	2.35385e+06	2.35064e+06	2.83149e+06	2.71728e+06	0.728008	0.336564	0.523205	0.930832	-0.103407	insig
MW0144897	all-trans-Nonaprenyl diphosphate	Organic acids	Organic acids	C45H76O7P2	3	0.6228	60037-55-0	9164.57	2242.71	2413.75	5184.51	8001.88	4029.15	0.54815	0.689148	0.801918	0.802823	-0.316846	insig
MW0159309	Vasicinol	Alcohol and amines	Alcohols	C11H12N2O2	3	0.6226	5081-51-6	20318.8	11931.3	11052.9	11968.1	6098.55	7036.63	1.02211	0.169538	0.343333	1.725	0.786593	insig
MEDL00977	(E,Z)-2-Amino-3,14-octadecadien-1-ol	Alcohol and amines	Alcohols	C18H35NO	3	0.6221	158507-68-7	4487.28	3635.18	5186.9	8699.06	9348.4	130.27	0.346377	0.641086	0.77045	0.732179	-0.449731	insig
MW0016281	N-octanoylsphingosine 1-phosphate	Organic acids	Organic acids	C26H52NO6P	3	0.6221	158983-53-0	199791	189071	182314	250872	225808	221915	1.32272	0.0242489	0.0964216	0.817607	-0.290521	insig
MW0001943	2-(4-Methoxyphenoxy)aniline	Benzene and substituted derivatives	Benzene and substituted derivatives	C13H13NO2	3	0.6217	105901-39-1	26083.7	31325.8	31512.6	32161.3	30420.5	32207.8	0.672148	0.389115	0.573962	0.938098	-0.0921896	insig
MW0123638	Diethyl pyridine-2,4-dicarboxylate	Others	Lactones	C11H13NO4	3	0.6209	41438-38-4	353.44	836.9	227.12	169.33	90.49	999.28	0.422661	0.887032	0.93675	1.12577	0.170915	insig
MW0016353	Cannabigerol	Phenolic acids	Phenolic acids	C21H32O2	3	0.6209	25654-31-3 | 2808-33-5	16370.6	24170.8	25669.3	24911.6	25504.3	25635.8	0.71024	0.373018	0.559125	0.870601	-0.199917	insig
MW0125626	N-Acetyl-L-tryptophanamide	Alcohol and amines	Amines	C13H15N3O2	3	0.6203	2382-79-8	3555.57	8609.85	13139	7364.19	10024	10274.4	0.373273	0.80884	0.888138	0.914749	-0.128552	insig
MEDP2103	4-Hydroxy-3-methylbenzaldehyde	Benzene and substituted derivatives	Benzene and substituted derivatives	C8H8O2	3	0.6195	15174-69-3	871630	818002	810135	348170	360211	350814	1.45644	0.00116661	0.0156793	2.36006	1.23883	up
MW0054697	Medicagenic acid	Terpenoids	Triterpene	C30H46O6	3	0.6195	599-07-5	43014.6	43314.9	45902.4	23147.4	21976.2	33426.2	1.30695	0.0324946	0.11572	1.68341	0.75139	insig
MW0063788	Tetracosanal	FA	Others	C24H48O	3	0.619	57866-08-7	23806.4	50118.2	490.82	103.37	1576.08	115.61	1.04253	0.233239	0.417778	41.4557	5.3735	up
MW0137269	Apiosylskimmin	Lignans and Coumarins	Coumarins	C20H24O12	3	0.6188	103529-94-8	189.69	155.07	452.1	1334.48	2026.47	294.44	1.03977	0.195524	0.376252	0.217996	-2.19763	down
MW0147048	Candimine	Alkaloids	Pyrrole alkaloids	C18H19NO6	3	0.6184	24585-19-1	10489.5	9270.93	11051.2	11677	11478.4	11920.4	1.13647	0.106462	0.254298	0.87843	-0.187	insig
MEDP2063	2-Hydroxyethyl salicylate	Benzene and substituted derivatives	Benzene and substituted derivatives	C9H10O4	3	0.6179	87-28-5	42484.2	77132	42867.9	83684.5	85338	40641.5	0.524586	0.447952	0.61939	0.774974	-0.367781	insig
MW0004624	4-amino-5-(phenoxymethyl)-4H-1,2,4-triazole-3-thiol	Phenolic acids	Phenolic acids	C9H10N4OS	3	0.6173	4461-15-8	393.96	711.29	396.27	723.09	754.65	585.54	0.934676	0.211794	0.397043	0.727734	-0.458516	insig
MW0156178	Pseudopurpurin	Quinones	Quinones	C15H8O7	3	0.6171	476-41-5	41418.9	30998.3	19809	61183.6	73157.2	60805.5	1.27052	0.0141964	0.0673412	0.4726	-1.08131	down
MW0113098	4'-Methoxy-alpha-pyrrolidinopropiophenone	Others	Ketone compounds	C14H19NO2	3	0.615	478243-09-3	5413.88	8228.56	5677.71	9520.32	7322.19	9406.33	1.0352	0.117899	0.272261	0.736038	-0.442147	insig
MW0118667	2-Mercaptonicotinonitrile	Heterocyclic compounds	Heterocyclic compounds	C6H4N2S	3	0.6149	52505-45-0	3201.48	5361.46	5482.22	6395.89	3423.02	3904.5	0.0902218	0.932269	0.963334	1.02345	0.0334341	insig
MW0145587	Arg-Gly-Asp-Cys	Amino acids and derivatives	Amino acids and derivatives	C15H27N7O7S	3	0.6142	109292-46-8	98797.2	95513.6	107020	95406.6	86418.6	92094.3	1.0657	0.106127	0.253988	1.10007	0.137597	insig
MW0133087	3-Hydroxy-3',4'-dimethoxyflavone	Flavonoids	Flavones	C17H14O5	3	0.6139	6889-80-1	6736.2	4064.05	2242.34	9274.96	7854.75	4676.69	0.87808	0.196129	0.376927	0.598108	-0.741521	insig
MW0016351	Cannabidiol dimethyl ether	Benzene and substituted derivatives	Benzene and substituted derivatives	C23H34O2	3	0.6123	1242-67-7	12707.6	34272.8	34304	12985.8	25816.1	25530.8	0.328527	0.543611	0.69428	1.2635	0.337424	insig
MW0152529	Leu-Trp-Met	Amino acids and derivatives	Amino acids and derivatives	C22H32N4O4S1	3	0.6101	55023-99-9	916.69	920.44	1341.33	859.21	692.26	422.72	1.04355	0.10266	0.248288	1.61001	0.687067	insig
MW0124060	Ethyl 2-amino-4-methylthiazole-5-carboxylate	Others	Lactones	C7H10N2O2S	3	0.6067	7210-76-6	1.54168e+06	1.49449e+06	1.36752e+06	1.58012e+06	1.64068e+06	1.65215e+06	1.16584	0.078275	0.208345	0.9037	-0.146084	insig
MW0110856	5-[(2-Methoxyethyl)amino]-1,3,4-thiadiazole-2-thiol	Others	Ketone compounds	C5H9N3OS2	3	0.6066	731776-65-1	7992.23	5563.31	1143.59	295.38	258.79	1375.2	1.15124	0.163921	0.335668	7.61862	2.92953	up
MW0010655	Secoisolariciresinol diglucoside	Lignans and Coumarins	Lignans	C32H46O16	3	0.6039	158932-33-3 | 148244-82-0	23736.8	12719.6	243.09	40806.7	44957.8	42373.5	0.917473	0.0424319	0.136987	0.286406	-1.80387	insig
MW0008811	Nafadotride	Benzene and substituted derivatives	Benzene and substituted derivatives	C22H27N3O2	3	0.6026	149649-22-9	39153.7	42734.5	42922.8	30887.8	32574.2	30950.5	1.41579	0.00628569	0.0418216	1.32198	0.402695	insig
MW0000313	Lampranthin II	Heterocyclic compounds	Heterocyclic compounds	C34H34N2O16	3	0.602	32074-65-0	498513	522633	507186	407675	419574	431601	1.42444	0.000810707	0.0130127	1.21407	0.27985	insig
MW0155503	Philanthotoxin	Alcohol and amines	Polyamines	C23H41N5O3	3	0.6018	115976-91-5	1237.59	2388.45	888.58	1524.12	310.89	3515.87	0.1438	0.806352	0.886378	0.843715	-0.245172	insig
MW0169670	11,12-Methyleneoctadecanoic acid	Organic acids	Organic acids	C19H36O2	3	0.6013	503-06-0	105391	93426.6	106925	305767	194813	172939	1.32018	0.0949423	0.234707	0.453949	-1.1394	down
MW0169578	N-tetradecanoyl-L-Homoserine Lactone	Amino acids and derivatives	Amino acids and derivatives	C18H33NO3	3	0.6003	202284-87-5	4150.63	7124.75	4690.26	8133.13	11825.2	11251.1	1.2577	0.0278052	0.103806	0.511565	-0.967012	insig
MW0114021	Buphedrone	Others	Ketone compounds	C11H15NO	3	0.5974	408332-79-6	78351.8	96171.6	106101	22208.3	21013.7	33888.1	1.40915	0.00522319	0.0369472	3.63928	1.86365	up
MW0156568	Scilliroside	Steroids	Cardiac glycoside	C32H44O12	3	0.5973	507-60-8	2936.5	728.1	2927.35	4369.9	2259.34	2242.92	0.552896	0.49726	0.657146	0.742993	-0.42858	insig
MW0139323	Peucedanin	Lignans and Coumarins	Coumarins	C15H14O4	3	0.5973	133-26-6	20185.9	21122.4	16552.5	26647.8	16508.5	22863.7	0.505148	0.469572	0.636622	0.876413	-0.190317	insig
MW0151766	Iresinin I	Alkaloids	Alkaloids	C36H42N2O23	3	0.597	78413-55-5	146426	138085	133624	209943	197641	199797	1.4372	0.000292995	0.00809148	0.688421	-0.538636	insig
MW0009134	N-Nitrosodiphenylamine	Benzene and substituted derivatives	Benzene and substituted derivatives	C12H10N2O	3	0.597	86-30-6 | 382165-80-2	128990	88111.5	135398	191803	64056.8	100865	0.1517	0.974914	0.986955	0.988156	-0.0171887	insig
MW0108511	N-[(3s)-2-Oxotetrahydrofuran-3-Yl]butanamide	Others	Lactones	C8H13NO3	3	0.5964	67605-85-0	19031.7	22543	11116.3	28868.4	23678.5	23436.3	0.977427	0.13404	0.294316	0.693455	-0.528125	insig
MW0155624	Plicatic acid	Lignans and Coumarins	Lignans	C20H22O10	3	0.5952	16462-65-0	9141.43	17756	3418.25	4777.52	9694.53	12197.1	0.00777414	0.81266	0.889668	1.13673	0.18489	insig
MW0124325	Huperzine b	Alkaloids	Alkaloids	C16H20N2O	3	0.5944	103548-82-9	14052.3	8164.01	11695.4	15881.4	11349.9	11518.4	0.513377	0.516434	0.672566	0.875147	-0.192403	insig
MW0153467	Mercaptoacetyl-Phe-Leu	Amino acids and derivatives	Amino acids and derivatives	C17H24N2O4S	3	0.5937	83328-02-3	4149.09	7170.78	2134.83	6900.47	4126.24	5307.92	0.517527	0.60433	0.743627	0.823692	-0.279824	insig
MW0150721	Cauloside A	Terpenoids	Triterpene Saponin	C35H56O8	3	0.5931	17184-21-3	2371.03	2243.04	2246.78	3750.2	3419.78	3086.14	1.39876	0.023217	0.094176	0.668952	-0.580026	insig
MW0150456	Gly-Phe-Met	Amino acids and derivatives	Amino acids and derivatives	C16H23N3O4S1	3	0.5915	72072-08-3	17071.8	4976.75	5430.78	11552.9	7878.74	11779.5	0.464552	0.788611	0.872517	0.880434	-0.183713	insig
MW0156387	Rhodoxanthin	Terpenoids	Terpene	C40H50O2	3	0.5897	116-30-3	29212.8	36907.1	32225.8	40283.8	31145.6	51262.5	0.790835	0.296865	0.485754	0.801566	-0.319107	insig
MW0152148	Latrunculin a	Heterocyclic compounds	Heterocyclic compounds	C22H31NO5S	3	0.5882	76343-93-6	348.67	103.08	370.72	695.01	68.1	358.33	0.0723271	0.65479	0.780175	0.733405	-0.447317	insig
MW0008767	N1,N2-di(pyridin-2-yl)benzene-1,2-diamine	Benzene and substituted derivatives	Benzene and substituted derivatives	C16H14N4	3	0.5871	300818-11-5	7472.97	9283.25	8023.9	8148.01	9711	5670.4	0.300255	0.769651	0.860333	1.05316	0.074718	insig
MW0143457	Isonicotinamidoxime	Benzene and substituted derivatives	Benzene and substituted derivatives	C6H7N3O	3	0.5865	1594-57-6 | 849833-58-5	15941.2	17975	14785.3	6621.8	8685.95	10105	1.34935	0.00494883	0.0356377	1.91642	0.938416	insig
MW0150632	Gradolide	Others	Lactones	C25H34O7	3	0.5864	68852-48-2	108545	213139	244158	4685.94	2285.72	3086.88	1.44014	0.0456619	0.143053	56.2549	5.81391	up
MW0055248	N-Arachidonoyl Taurine	Lipids	Free fatty acids	C22H37NO4S	3	0.5842	119959-65-8	60040.5	44888	55422.1	36274.7	13516.4	32131.7	1.10596	0.0432735	0.138395	1.95734	0.968894	insig
MW0154937	Patellamide C	Alcohol and amines	Amines	C37H46N8O6S2	3	0.5835	81120-74-3	407.87	1422.58	536.25	1894.12	2041.37	2706.8	1.21022	0.026859	0.10159	0.356308	-1.4888	down
MW0169580	N-undecanoyl-L-Homoserine lactone	Others	Lactones	C15H27NO3	3	0.5824	216596-71-3	4123.82	12697.6	7291.52	18988.5	6064.68	5806	0.26458	0.682859	0.797361	0.781385	-0.355895	insig
MW0110745	2-Hexadecanoylthio-1-ethylphosphorylcholine	Organic acids	Organic acids	C23H48NO5PS	3	0.5821	60793-01-3	83945	47354.4	76011.7	110638	68937.9	97058.3	0.804154	0.23608	0.421743	0.749405	-0.416182	insig
MW0151988	Kalbreclasine	Alkaloids	Alkaloids	C20H23NO12	3	0.5812	98900-01-7	598.24	587	545.08	584.87	127.93	758.35	0.500224	0.691452	0.803773	1.17617	0.234095	insig
MW0139321	Petunidin-3-(p-coumaroyl)-rutinoside-5-glucoside	Flavonoids	Anthocyanidins	C43H49O23+	3	0.581	106863-71-2	34628.1	38388	33451.4	46960.7	62470.4	31488.2	0.751222	0.327113	0.513397	0.755521	-0.404456	insig
MW0161646	6-Deoxotyphasterol	Others	Lactones	C28H50O3	3	0.5793	164034-47-3	29363.5	51669.3	26619.5	43914.2	17113.1	23354.2	0.544231	0.531359	0.685454	1.27578	0.351379	insig
MW0148158	D-Apiitol	Alcohol and amines	Alcohols	C5H12O5	3	0.5791	10592-17-3	5536.86	18174.7	10952.6	21079.9	26798.3	29351.4	1.14324	0.0391431	0.130434	0.448844	-1.15571	down
MW0000452	Strychnine	Alkaloids	Alkaloids	C21H22N2O2	3	0.579	57-24-9	878.01	716.27	112.41	828.75	243.44	617.75	0.181698	0.985594	0.992486	1.00991	0.014229	insig
Hmsn000210	methyl (7E,10E)-hexadeca-7,10-dienoate	Lipids	Free fatty acids	C17H30O2	3	0.5761	16106-03-9	6434.69	11346	11567.9	11532	16514.6	12853.2	0.916416	0.162049	0.333359	0.717575	-0.478798	insig
MW0143911	7,4'-Dihydroxy-8-methylflavan	Heterocyclic compounds	Heterocyclic compounds	C16H16O3	3	0.5748	82925-55-1 | 75412-98-5	2369.98	13277.1	15181.7	6311.85	9007.48	7950.65	0.0219507	0.594792	0.73587	1.32483	0.405805	insig
MW0052461	Docosyl acetate	FA	Others	C24H48O2	3	0.5717	822-26-4	21677	30620.5	43382.2	33385.5	33213.1	43610.4	0.534406	0.546684	0.696063	0.868166	-0.203957	insig
MW0116645	1,3-Diazaspiro[4.6]undecane-2,4-dione	Others	Ketone compounds	C9H14N2O2	3	0.5717	707-16-4	419.24	26.84	323.16	956.07	1676.91	660.04	1.04751	0.0935386	0.233217	0.233597	-2.09791	down
MW0012160	(Z)-hexadec-11-enoic acid	Lipids	Free fatty acids	C16H30O2	3	0.5715	2416-20-8	29712.2	48538.8	18297.5	102184	106338	72551.8	1.28276	0.0121239	0.061878	0.343498	-1.54162	down
MW0144912	alpha-(p-Methoxyphenyl)-6-methyl-2-pyridineacrylic acid	Phenolic acids	Phenolic acids	C16H15NO3	3	0.5704	23877-48-7	86341.4	88319.3	80652.1	27347.2	37909.4	22405	1.40294	0.00177333	0.0194824	2.91248	1.54225	up
MW0155665	(2S)-4-[(E)-2-(carboxymethylamino)vinyl]-2,3-dihydropyridine-2,6-dicarboxylic acid	Organic acids	Organic acids	C11H12N2O6	3	0.5703	135545-99-2	771.64	1455.44	413.86	1080.97	1687.77	1478.52	0.881703	0.221185	0.405741	0.621799	-0.685481	insig
MW0107087	H-Gly-Phe-Ser-OH	Amino acids and derivatives	Amino acids and derivatives	C14H19N3O5	3	0.5695	23828-14-0	1467.34	919.8	879.57	911.06	1683	639.69	0.141205	0.97775	0.987547	1.01019	0.0146302	insig
MW0110918	Arcaine	Alcohol and amines	Polyamines	C6H16N6	3	0.5686	544-05-8	33195.1	25436.4	21585.4	17074.4	22415	22985.3	0.890919	0.22333	0.407266	1.28399	0.360635	insig
MW0157018	Serpentine (alkaloid)	Alkaloids	Plumerane	C21H20N2O3	3	0.5685	131-07-7	2215.4	2019.42	836.53	1646.28	656.32	402.75	0.832467	0.242442	0.429121	1.87456	0.906555	insig
MW0003251	2-Methylanthraquinone	Benzene and substituted derivatives	Benzene and substituted derivatives	C15H10O2	3	0.5657	84-54-8	6132.79	3002.45	4272.04	19610	25657.3	20749.4	1.40776	0.00386073	0.030604	0.203089	-2.29982	down
MW0109829	Thapsigargin	Heterocyclic compounds	Heterocyclic compounds	C34H50O12	3	0.5649	67526-95-8 | 123269-03-4	5901.4	3148.98	4046.99	3954.55	1871.19	1168.65	0.978034	0.155688	0.324139	1.87255	0.905007	insig
MW0121400	5-cyanofuran-2-carboxylic Acid	Organic acids	Organic acids	C6H3NO3	3	0.5646	212197-74-5	115078	77424.8	140284	172099	149761	137846	0.996168	0.132194	0.292218	0.723915	-0.466108	insig
MW0151707	Iminoacetic acid	Organic acids	Organic acids	C2H3NO2	3	0.564	4472-12-2	5973.63	5226.84	10633.5	13236.6	3085.45	24979	0.399729	0.414784	0.592268	0.528655	-0.919602	insig
MW0123384	Clerodin	Heterocyclic compounds	Heterocyclic compounds	C24H34O7	3	0.5631	464-71-1	63797.5	59260.2	62431.8	33772.2	30938.7	37007.8	1.43432	0.000329097	0.00845123	1.82355	0.866753	insig
MW0125375	N-(3-phenylpropyl)quinazolin-4-amine	Alcohol and amines	Amines	C17H17N3	3	0.5628	153810-67-4	21.26	749.72	7.09	43.35	39.59	30.01	0.13505	0.461363	0.630459	6.88862	2.78422	insig
MW0063313	Reciniferatoxin	Terpenoids	Ditepenoids	C37H40O9	3	0.5616	57444-62-9	25965.1	23000.6	28884.7	30361.9	23949.5	18747.7	0.360257	0.700278	0.809495	1.06558	0.0916402	insig
MW0139669	Schisandrin B	Lignans and Coumarins	Lignans	C23H28O6	3	0.5616	61281-37-6	15586.3	20976.1	18481.1	18261.7	16928.6	12039.9	0.676379	0.349725	0.536157	1.16543	0.22086	insig
MW0151663	Ile-Ala	Amino acids and derivatives	Amino acids and derivatives	C9H18N2O3	3	0.5588	24787-73-3	832.25	9032.69	1744.41	9982.54	16330	13301.8	1.11464	0.0483957	0.148955	0.293059	-1.77073	down
MW0002507	2-[(4-Nitrophenyl)sulfonyl]benzoic acid	Benzene and substituted derivatives	Benzene and substituted derivatives	C13H9NO6S	3	0.5555	39950-34-0	15009.1	20435.9	2105.28	7638.05	7932.96	2652.14	0.407552	0.358838	0.546181	2.06059	1.04305	insig
MW0120006	Benzoic acid, 4,4'-(3-oxo-1(3H)-isobenzofuranylidene)bis-	Organic acids	Organic acids	C22H14O6	3	0.5518	7535-16-2	4487.55	3235.57	5963.97	2696.06	5033.4	4910	0.23262	0.765715	0.858937	1.08289	0.114881	insig
MEDP1359	Asterina 330	Amino acids and derivatives	Amino acids and derivatives	C12H20N2O6	3	0.551	84563-31-5	1703.5	19.61	606.25	3185.71	12605.1	11581.4	1.11236	0.103813	0.249856	0.0850996	-3.5547	down
MW0006095	Methyl 2,4-dihydroxy-3,6-dimethylbenzoate	Benzene and substituted derivatives	Benzene and substituted derivatives	C10H12O4	3	0.5508	4707-47-5 | 91061-32-4	48007.6	45629.9	72540.1	55754.8	100102	61699.6	0.70736	0.36461	0.551428	0.763836	-0.388665	insig
MW0156364	Spartein-5-ol	Alkaloids	Alkaloids	C15H26N2O	3	0.5478	2122-29-4	99.84	1356.63	1870.72	1600.82	6490.24	3278.38	0.916507	0.194425	0.375261	0.292643	-1.77279	insig
MW0162863	3-(Imidazol-4-yl)-2-oxopropyl phosphate(2-)	Organic acids	Organic acids	C6H7N2O5P-2	3	0.5436	99979-59-6	12101.5	10972	12413.5	26932.8	17794.1	20951.8	1.34533	0.0606448	0.173665	0.540313	-0.888132	insig
MEDP1681	Leu-Gly-Leu	Amino acids and derivatives	Amino acids and derivatives	C14H27N3O4	3	0.542	19408-48-1	50216.8	47777.2	44495.9	440152	416519	414654	1.45796	0.000297214	0.00815215	0.11208	-3.1574	down
MW0011981	10,12-Tricosadiynoic acid	Lipids	Free fatty acids	C23H38O2	3	0.542	66990-30-5	7766.38	9128.8	11329.6	6699.47	7782.99	12945.5	0.184397	0.910931	0.95098	1.02905	0.0413114	insig
MW0108480	tert-Butoxycarbonylasparagine	Amino acids and derivatives	Amino acids and derivatives	C9H16N2O5	3	0.5405	7536-55-2	38959.3	25773.5	23096.4	21479.9	22077.5	26399	0.748992	0.348995	0.53585	1.25549	0.328245	insig
MW0012965	(9Z,12Z)-9,12-Octadecadienoic acid 1-(hydroxymethyl)-2-[(1-oxohexadecyl)oxy]ethyl ester	GL	DG	C37H68O5	3	0.5347	73649-99-7	4169.67	13857.8	3672.02	6643.77	4553.07	4807.19	0.207337	0.627238	0.760151	1.35588	0.439225	insig
MW0142634	3-(N-Nitrosomethylamino)propionaldehyde	Others	Aldehyde compounds	C4H8N2O2	3	0.5321	85502-23-4	584.56	608.27	552.57	4346.58	3585.99	2635.56	1.43909	0.0270666	0.101898	0.165157	-2.59809	down
MEDTP00538	3-Oxo-octanoic acid (2-oxo-tetrahydro-furan-3-YL)-amide	Amino acids and derivatives	Amino acids and derivatives	C12H19NO4	3	0.5287	147795-39-9	43090.6	42321.3	55133.7	43146.6	47502	40876.4	0.440277	0.560915	0.706974	1.06858	0.095701	insig
MW0001610	1-Hydroxy-4-methylanthraquinone	Benzene and substituted derivatives	Benzene and substituted derivatives	C15H10O3	3	0.5271	645389-64-6	1770.73	274.25	465.55	647.17	1199.51	809.71	0.409138	0.929558	0.962995	0.945091	-0.081475	insig
MW0000181	Chelidonine	Alkaloids	Isoquinoline alkaloids	C20H19NO5	3	0.527	476-32-4	101337	69275.7	79524.8	89621.9	98335.6	83537.1	0.520447	0.545544	0.695646	0.921336	-0.118201	insig
MW0146617	(2R,3S)-Methyl 3-benzamido-2-hydroxy-3-phenylpropanoate	Benzene and substituted derivatives	Benzene and substituted derivatives	C17H17NO4	3	0.523	32981-85-4 | 132074-01-2	241770	250719	252849	243346	250844	255007	0.192678	0.802426	0.883501	0.994848	-0.00745154	insig
MW0108167	Met-Met-Ala	Amino acids and derivatives	Amino acids and derivatives	C13H25N3O4S2	3	0.5225	14486-08-9	29525.7	34212.7	31483.4	31709.5	33487.5	30804.6	0.138618	0.878459	0.930867	0.991876	-0.0117676	insig
MW0117716	2-(Methylthio)-6-nitro-1,3-benzothiazole	Benzene and substituted derivatives	Benzene and substituted derivatives	C8H6N2O2S2	3	0.5199	3621-99-6	451133	440511	500032	435156	557485	529854	0.657949	0.370629	0.556771	0.914075	-0.129615	insig
MW0154569	Nobilin	Terpenoids	Sesquiterpenoids	C20H26O5	3	0.5155	31824-11-0	973082	962447	859488	956193	932022	971645	0.410361	0.618359	0.753154	0.977326	-0.0330879	insig
MW0012180	12R-Hete	Lipids	Free fatty acids	C20H32O3	3	0.5106	82337-46-0	36541.3	79966.5	23031.5	66935.9	219042	220477	1.12098	0.127166	0.284694	0.275521	-1.85976	down
MW0123970	Ethyl 3-isothiocyanato-1H-indole-2-carboxylate	Alkaloids	Plumerane	C12H10N2O2S	3	0.5078	204635-82-5	31097.6	15381.9	25777.4	54861.4	36559.5	17515.5	0.589697	0.381136	0.567481	0.663294	-0.59228	insig
MW0103299	(-)-Neplanocin A	Nucleotides and derivatives	Nucleotides and derivatives	C11H13N5O3	2	0.9509	-	53283.4	67004.3	51172.9	6336.67	12856.8	12433.1	1.40365	0.00483849	0.0351582	5.4214	2.43867	up
MW0151334	Ile-Arg-Phe	Amino acids and derivatives	Amino acids and derivatives	C21H34N6O4	2	0.94	-	253073	342204	185593	1967.31	83693.8	249045	0.815162	0.171229	0.34589	2.333	1.22218	insig
MW0145469	Arg-Phe-Thr	Amino acids and derivatives	Amino acids and derivatives	C19H30N6O5	2	0.9177	-	1712.07	13399	11690.7	10963	11375.7	3717.65	0.174295	0.958133	0.977135	1.02861	0.0406894	insig
MW0145569	Arg-Val-Phe	Amino acids and derivatives	Amino acids and derivatives	C20H32N6O4	2	0.9152	-	6012.78	17191.2	18138.3	15139.4	23605.3	30402	0.843755	0.191591	0.371673	0.597893	-0.74204	insig
MW0015228	7-Oxocallitrisic acid, methyl ester	Others	Lactones	C21H28O3	2	0.9127	-	7624	7607.4	4381.8	8143.45	455.35	1900.4	0.837701	0.331427	0.51775	1.86807	0.901546	insig
MW0146019	Asp-Arg-Asp	Amino acids and derivatives	Amino acids and derivatives	C14H24N6O8	2	0.9079	-	53.06	328.36	65.34	1657.35	2195.03	2130.15	1.35631	0.00225138	0.0223159	0.0746774	-3.74318	down
MW0157617	Thr-Gln-Tyr	Amino acids and derivatives	Amino acids and derivatives	C18H26N4O7	2	0.9053	-	17648.7	18964.1	16642.8	9088.72	15944.4	9238.85	1.1427	0.0972246	0.238922	1.55391	0.635903	insig
MW0144471	Ala-Arg-Glu	Amino acids and derivatives	Amino acids and derivatives	C14H26N6O6	2	0.902	-	118325	108747	100498	110143	100138	106454	0.411719	0.582931	0.726322	1.03421	0.0485256	insig
MW0137174	Dioonflavone	Others	Ketone compounds	C36H30O10	2	0.9002	-	759.34	889.3	129.03	2904.29	745.67	219.56	0.408441	0.489559	0.652686	0.459403	-1.12217	insig
MW0154729	Oleoyl Ethanolamide-d4	Lipids	Free fatty acids	C20H35D4NO2	2	0.8968	-	443.99	581.4	444.75	687.63	853.31	1196.92	1.2448	0.0956488	0.236019	0.536967	-0.897095	insig
MW0146229	Asp-Phe-Trp	Amino acids and derivatives	Amino acids and derivatives	C24H26N4O6	2	0.8962	-	13991.5	9778.53	8859.58	184.06	141.72	1062.29	1.37122	0.0192841	0.0830701	23.5072	4.55503	up
MW0151081	His-Ser-Leu	Amino acids and derivatives	Amino acids and derivatives	C15H25N5O5	2	0.8813	-	787.16	398.1	225.22	51077.4	50086.3	46624.9	1.4424	0.000650041	0.0117532	0.0095439	-6.7112	down
MW0149772	Gln-Phe-Asp	Amino acids and derivatives	Amino acids and derivatives	C18H24N4O7	2	0.873	-	3202.99	1161.79	3877.91	1369.88	815.73	1832.3	0.864302	0.220396	0.405456	2.05149	1.03667	insig
MW0136684	Dihydrorobustic acid	Organic acids	Organic acids	C22H22O6	2	0.8725	-	9563.35	13411.4	20285	6845.69	6043.38	3947.43	1.25436	0.0977415	0.23966	2.5694	1.36143	up
MW0157826	Thr-Trp-Met	Amino acids and derivatives	Amino acids and derivatives	C20H28N4O5S1	2	0.8723	-	92725.4	86965.4	86960.4	147481	136578	145800	1.44589	0.000598408	0.011381	0.620322	-0.68891	insig
MW0110184	Tyr-Ala-Lys	Amino acids and derivatives	Amino acids and derivatives	C18H28N4O5	2	0.8701	-	2957.57	4123.28	4045.65	5292.08	4248.75	5855.53	1.09693	0.0806561	0.212397	0.722671	-0.468589	insig
MW0150513	Gly-Tyr-Asp	Amino acids and derivatives	Amino acids and derivatives	C15H19N3O7	2	0.8663	-	2597.49	1979.82	1905.52	1157.03	2438.68	466.71	0.824733	0.296463	0.485754	1.5958	0.674284	insig
MW0110180	Tumonoic acid I	Organic acids	Organic acids	C27H47NO7	2	0.8603	-	1517.72	1125.86	2676.74	2121.03	7474.08	6171.95	1.07682	0.155171	0.323332	0.337433	-1.56733	down
MW0058413	1-(9Z-nonadecenoyl)-glycero-3-phosphoethanolamine	GP	PE	C24H48NO7P	2	0.8602	-	5819.5	14268.8	2960.32	2658.52	15904.6	3054.48	0.211008	0.935507	0.963957	1.0662	0.0924733	insig
MW0155999	Pro-Thr-Asn	Amino acids and derivatives	Amino acids and derivatives	C13H22N4O6	2	0.8596	-	319.28	325.07	83.37	12772.2	14336.2	14143.2	1.42626	0.00103316	0.0144642	0.017641	-5.82492	down
MW0158555	Tyr-Met-Leu	Amino acids and derivatives	Amino acids and derivatives	C20H31N3O5S1	2	0.8522	-	135871	116683	124439	137199	136494	137571	1.03505	0.176499	0.352823	0.916671	-0.125524	insig
MW0145258	Arg-Arg-Asn	Amino acids and derivatives	Amino acids and derivatives	C16H32N10O5	2	0.847	-	1340.62	908.81	991.97	148.69	31.39	452.09	1.17338	0.00888507	0.0513983	5.12742	2.35823	up
MW0108732	N-Pentadecylcyclohexanecarboxamide	Alcohol and amines	Amines	C22H43NO	2	0.8453	-	2.27969e+06	398680	144687	3.07077e+06	1.03327e+06	669020	0.653996	0.553725	0.701861	0.591458	-0.757653	insig
MW0110197	Tyr-Glu-Arg	Amino acids and derivatives	Amino acids and derivatives	C20H30N6O7	2	0.8439	-	388.82	464.25	680.34	182.63	498.79	736.98	0.320097	0.846946	0.910394	1.08108	0.112479	insig
MW0150333	Gly-Asp-Val	Amino acids and derivatives	Amino acids and derivatives	C11H19N3O6	2	0.8424	-	66711.6	58137	65419.8	57353.5	48112.4	52403.2	1.19007	0.0458989	0.143307	1.20523	0.269307	insig
MW0155987	Pro-Ser-Asn	Amino acids and derivatives	Amino acids and derivatives	C12H20N4O6	2	0.8389	-	152405	165276	153055	134272	114661	109031	1.30977	0.0215111	0.0886763	1.31504	0.395105	insig
MW0110073	Trp-Lys-Arg	Amino acids and derivatives	Amino acids and derivatives	C23H36N8O4	2	0.8387	-	3656.93	4984.99	1910.94	6857.39	2668.02	3312.26	0.326182	0.657615	0.781694	0.822023	-0.282749	insig
MW0155979	Pro-Pro-Leu	Amino acids and derivatives	Amino acids and derivatives	C16H27N3O4	2	0.8362	-	330.89	271.51	259.17	10536.5	8830.83	8102.73	1.45612	0.00650712	0.0423995	0.031364	-4.99475	down
MW0149838	Gln-Tyr-Glu	Amino acids and derivatives	Amino acids and derivatives	C19H26N4O8	2	0.8286	-	994.66	568.44	713.55	830.57	1231.22	783.6	0.683667	0.374042	0.560229	0.800119	-0.321714	insig
MW0158597	Tyr-Ser-Asn	Amino acids and derivatives	Amino acids and derivatives	C16H22N4O7	2	0.8253	-	3577.11	1321.66	10746.6	851.65	2660.21	1053.22	0.859255	0.322351	0.509295	3.4272	1.77703	insig
MW0155304	Phe-Phe-Met	Amino acids and derivatives	Amino acids and derivatives	C23H29N3O4S1	2	0.8156	-	972.82	323.39	638	909.98	422.9	2331.14	0.569203	0.423898	0.598262	0.527893	-0.921683	insig
MW0156323	R-4-benzyl-3-((R)-3-hydroxy-2,2-dimethyloctanoyl)-5,5-dimethyloxazolidin-2-one	Benzene and substituted derivatives	Benzene and substituted derivatives	C22H33NO4	2	0.8141	-	27693.6	7527.33	23079	5291.22	7424	5861.49	1.12361	0.160779	0.331591	3.13834	1.65	up
MW0155193	Phe-Glu-Val-Glu	Amino acids and derivatives	Amino acids and derivatives	C24H34N4O9	2	0.802	-	3898.04	4986.46	3712.05	6677.09	4258.97	8316.58	0.98243	0.192695	0.372995	0.654277	-0.612028	insig
MW0107740	Leu-Leu-Ser	Amino acids and derivatives	Amino acids and derivatives	C15H29N3O5	2	0.8018	-	170657	183691	181083	100898	103773	60215	1.31163	0.0174571	0.0782076	2.02136	1.01532	up
MW0158210	Trp-Met-Trp	Amino acids and derivatives	Amino acids and derivatives	C27H31N5O4S1	2	0.7979	-	1982.94	1144.81	3881.13	2379.14	2795.33	3012.96	0.519219	0.678835	0.794734	0.856054	-0.224227	insig
MW0153098	Lys-Phe-Ile	Amino acids and derivatives	Amino acids and derivatives	C21H34N4O4	2	0.7944	-	165931	84346.8	139458	329317	264267	342132	1.31496	0.00589768	0.0403042	0.416511	-1.26357	down
MW0145529	Arg-Trp-His	Amino acids and derivatives	Amino acids and derivatives	C23H31N9O4	2	0.7922	-	2405.74	1685.28	1277.1	3032.34	1730.88	79.56	0.501451	0.862385	0.921119	1.10848	0.148581	insig
MW0151683	Ile-Phe	Amino acids and derivatives	Amino acids and derivatives	C15H22N2O3	2	0.7896	-	345414	318735	295220	319613	333754	322663	0.289243	0.743953	0.8433	0.98293	-0.0248389	insig
MW0155305	Phe-Phe-Ser	Amino acids and derivatives	Amino acids and derivatives	C21H25N3O5	2	0.7881	-	42837.5	38229.2	39886.8	58272.1	51894.4	48996.3	1.33247	0.0265383	0.100929	0.759936	-0.396051	insig
MW0155308	Phe-Phe-Tyr	Amino acids and derivatives	Amino acids and derivatives	C27H29N3O5	2	0.7834	-	312.82	82.4	238.38	270.37	492.31	301.99	0.837492	0.212757	0.397874	0.595114	-0.748762	insig
MW0146105	Asp-Glu-Phe	Amino acids and derivatives	Amino acids and derivatives	C18H23N3O8	2	0.7825	-	109331	115272	110332	51056.5	47008	51800.1	1.45369	1.83663e-05	0.00258116	2.23492	1.16022	up
MW0054336	alpha-L-Fucp-(1->3)-[beta-D-Galp-(1->4)]-D-GlcpNAc	Others	Saccharides	C20H35NO15	2	0.7789	-	26475.7	28032.8	23184.6	14595.7	12779.8	14287.3	1.4237	0.00709095	0.0448834	1.86481	0.899028	insig
MW0159245	Val-Val-Thr	Amino acids and derivatives	Amino acids and derivatives	C14H27N3O5	2	0.778	-	24894.8	36852.8	34975.7	28251	15734.3	24015.7	0.951178	0.140822	0.303634	1.42238	0.508308	insig
MW0155310	Phe-Pro-Asn	Amino acids and derivatives	Amino acids and derivatives	C18H24N4O5	2	0.7765	-	65595.4	26090.9	66054.9	60556	59764.5	73281	0.599448	0.46761	0.635886	0.814772	-0.295532	insig
MW0138447	Irigenin, 7-benzyl ether	Flavonoids	Flavones	C25H22O8	2	0.7757	-	32835.4	25527.9	21810.3	28179.9	25555.8	35956.7	0.506787	0.519589	0.675137	0.893872	-0.161859	insig
MW0107916	L-N5-(1-Imino-3-pentenyl) ornithine	Amino acids and derivatives	Amino acids and derivatives	C10H19N3O2	2	0.775	-	301.92	629.66	333.35	2427.45	343.23	112.43	0.102027	0.541062	0.692779	0.438738	-1.18857	insig
MW0052784	(1R,4R,5R,7R,8R,11R,17S,18S)-4,5,7,8,17-pentahydroxy-14,18-dimethyl-6-methylidene-3,10-dioxapentacyclo[9.8.0.01,7.04,19.013,18]nonadec-14-ene-9,16-dione	Others	Ketone compounds	C20H24O9	2	0.7741	-	66137.1	80098.6	61976.8	78150.5	63243.4	52634.7	0.395773	0.636887	0.767462	1.0731	0.101786	insig
MW0107096	Gly-Tyr-Arg	Amino acids and derivatives	Amino acids and derivatives	C17H26N6O5	2	0.7738	-	17608	40080.7	45852.7	30951	28723.6	27351.3	0.227715	0.589123	0.730201	1.18978	0.250692	insig
MW0105796	Asn-Tyr-Arg	Amino acids and derivatives	Amino acids and derivatives	C19H29N7O6	2	0.7725	-	137329	169224	131537	106667	110256	108096	1.28592	0.0834199	0.21728	1.3479	0.430709	insig
MW0053732	2,3-Dihydroxypropyl 2-[(octadec-9-enoyl)amino]ethyl hydrogen phosphate	Lipids	Free fatty acids	C23H46NO7P	2	0.7724	-	421.4	193.41	109.88	3741.81	214.65	1064.2	0.932045	0.309895	0.499199	0.144342	-2.79244	insig
MW0007286	Haematoxylone, tetramethyl-	Heterocyclic compounds	Heterocyclic compounds	C20H20O7	2	0.7719	-	466.87	767.01	520.88	909.5	1304.43	1352.73	1.27913	0.0292124	0.106882	0.49199	-1.0233	down
MW0108156	Met-His-Arg	Amino acids and derivatives	Amino acids and derivatives	C17H30N8O4S1	2	0.77	-	25204.3	15824.7	32517	3425.18	2296.86	2869.83	1.42273	0.0457763	0.143189	8.55995	3.0976	up
MW0146284	Asp-Trp-Asp	Amino acids and derivatives	Amino acids and derivatives	C19H22N4O8	2	0.7699	-	74400.2	96695.4	84882.1	66475.8	72887.7	76905.4	1.00388	0.164889	0.337284	1.18361	0.243192	insig
MW0137735	Cosmosiin hexaacetate	Others	Lactones	C33H32O16	2	0.7695	-	46622.8	44175.5	76777.3	74155.3	74098.3	129670	1.02061	0.177552	0.354176	0.602955	-0.729877	insig
MW0146023	Asp-Arg-His	Amino acids and derivatives	Amino acids and derivatives	C16H26N8O6	2	0.7682	-	64990.5	51836.6	66525.2	60152	69442	67451.1	0.565179	0.458767	0.628098	0.93051	-0.103907	insig
MW0130429	2',4'-Dihydroxychalcone 4'-glucoside	Others	Ketone compounds	C21H22O8	2	0.7673	-	26103.9	32024.2	28760.3	9742.7	3256.47	4764.27	1.36096	0.000974335	0.0141314	4.89142	2.29025	up
MW0158906	Val-Arg-Val	Amino acids and derivatives	Amino acids and derivatives	C16H32N6O4	2	0.7656	-	31418	22429.8	33197.6	19002.3	2694.38	14065.6	0.997554	0.0502739	0.152925	2.434	1.28333	insig
MW0110336	Val-Asp-Arg	Amino acids and derivatives	Amino acids and derivatives	C15H28N6O6	2	0.7647	-	101343	99290.9	105111	72859.5	69464.9	72747.7	1.44679	0.000303758	0.00816501	1.42159	0.507507	insig
MW0144451	Ala-Ala-Ala-Arg-Phe	Amino acids and derivatives	Amino acids and derivatives	C24H38N8O6	2	0.7625	-	599.94	920.71	1156.39	807.72	1197.54	711.15	0.0728867	0.955177	0.975326	0.985507	-0.0210626	insig
MW0158417	Tyr-Asp-Ser	Amino acids and derivatives	Amino acids and derivatives	C16H21N3O8	2	0.7623	-	839.86	2150.39	4568.17	11980.1	7785.9	9432.02	1.22355	0.0119623	0.0616106	0.258868	-1.94971	down
MW0109098	Phe-Asp-Cys	Amino acids and derivatives	Amino acids and derivatives	C16H21N3O6S1	2	0.7618	-	351429	152487	94847.9	457232	439029	437892	1.13558	0.0865905	0.222378	0.448796	-1.15587	down
MW0107251	His-Gln-Arg	Amino acids and derivatives	Amino acids and derivatives	C17H29N9O5	2	0.7604	-	2228.11	7234.33	6035.9	8981.87	8858.54	504.1	0.207876	0.784886	0.870004	0.844849	-0.243235	insig
MW0137929	Deoxysappanone B 7,3'-dimethyl ether	Others	Ketone compounds	C18H18O5	2	0.7602	-	3520.61	1588.67	1870.05	2786.76	501.86	2821.57	0.368685	0.782109	0.868723	1.14224	0.191871	insig
MW0054017	Incensole	Heterocyclic compounds	Heterocyclic compounds	C20H34O2	2	0.7598	-	149340	147512	145768	161378	139786	158157	0.525152	0.495885	0.657146	0.963644	-0.0534283	insig
MW0151400	Ile-Gln-Met	Amino acids and derivatives	Amino acids and derivatives	C16H30N4O5S1	2	0.7598	-	56239.8	56874.8	60047.8	82503.2	81860.5	85972.9	1.44541	0.000126379	0.00540732	0.691718	-0.531744	insig
MW0110222	Tyr-Thr	Amino acids and derivatives	Amino acids and derivatives	C13H18N2O5	2	0.7593	-	536429	552678	565545	835107	783940	792586	1.44644	0.000709956	0.012392	0.686113	-0.543482	insig
MW0149657	Gln-Cys-His	Amino acids and derivatives	Amino acids and derivatives	C14H22N6O5S1	2	0.7593	-	35145.7	45754.8	93049.3	58385.6	62343.2	64773.6	0.366411	0.849194	0.912567	0.937723	-0.0927662	insig
MW0110078	Trp-Phe-Arg	Amino acids and derivatives	Amino acids and derivatives	C26H33N7O4	2	0.7592	-	483.69	65.42	272.22	33.07	638.83	335.58	0.0435175	0.78653	0.871233	0.815232	-0.294717	insig
MW0153201	Lys-Val-His	Amino acids and derivatives	Amino acids and derivatives	C17H30N6O4	2	0.759	-	35856.4	35615.2	31832.4	37180.9	39352.3	34418.8	0.796844	0.258165	0.44579	0.93107	-0.103039	insig
MW0154554	N-methylundec-10-enamide	FA	Others	C12H23NO	2	0.759	-	4508.76	3014.06	6065.65	13828.1	968.83	10735.1	0.154142	0.413408	0.592006	0.532213	-0.909925	insig
MW0107100	Gly-Val-Gln	Amino acids and derivatives	Amino acids and derivatives	C12H22N4O5	2	0.7576	-	66423.2	61421.1	61803.7	63556.7	98501.9	59759.5	0.55703	0.476777	0.642982	0.854971	-0.226053	insig
MW0106908	Glu-Ile-Phe	Amino acids and derivatives	Amino acids and derivatives	C20H29N3O6	2	0.7575	-	612.65	836.03	1157.53	638.31	282.77	402.76	1.10939	0.0974217	0.239077	1.96867	0.977225	insig
MW0156989	Ser-Val-Val	Amino acids and derivatives	Amino acids and derivatives	C13H25N3O5	2	0.7575	-	43954.7	12859.6	24930.5	32497.6	28961.6	22615.2	0.265888	0.941175	0.967079	0.972292	-0.0405382	insig
MW0151134	His-Tyr-Phe	Amino acids and derivatives	Amino acids and derivatives	C24H27N5O5	2	0.7573	-	46992.6	51441.2	21314.5	27006.2	23234.8	20142	0.912427	0.218206	0.402683	1.70138	0.766706	insig
MW0153076	Lys-Met-His	Amino acids and derivatives	Amino acids and derivatives	C17H30N6O4S1	2	0.7569	-	121712	120495	126664	188046	168526	166719	1.41944	0.0123517	0.0623305	0.704908	-0.504493	insig
MW0145533	Arg-Trp-Tyr	Amino acids and derivatives	Amino acids and derivatives	C26H33N7O5	2	0.7568	-	15551.7	13830.7	16766.2	15692.5	14929.6	15451.7	0.0161962	0.979725	0.988799	1.00162	0.0023381	insig
MW0145572	Arg-Val-Ser	Amino acids and derivatives	Amino acids and derivatives	C14H28N6O5	2	0.7566	-	120804	115261	102640	169975	147133	151452	1.35297	0.00946881	0.0533215	0.722864	-0.468204	insig
MW0158282	Trp-Val-Arg	Amino acids and derivatives	Amino acids and derivatives	C22H33N7O4	2	0.7566	-	756248	713387	750886	1.17386e+06	1.09568e+06	1.0963e+06	1.4446	0.000961754	0.0140103	0.659722	-0.60007	insig
MW0146333	Asp-Arg	Amino acids and derivatives	Amino acids and derivatives	C10H19N5O5	2	0.7556	-	72.46	648.2	63.22	411.48	72.46	267.66	0.257529	0.963599	0.980598	1.04295	0.0606678	insig
MW0155767	Pro-Ala-Leu	Amino acids and derivatives	Amino acids and derivatives	C14H25N3O4	2	0.755	-	6774.16	6666.76	8233.39	9784.63	6360.98	3959.02	0.35924	0.790951	0.874689	1.07808	0.108458	insig
MW0158563	Tyr-Phe-Asp	Amino acids and derivatives	Amino acids and derivatives	C22H25N3O7	2	0.7539	-	9070.42	5486.98	11802.7	15853	10738.4	13927.8	0.989048	0.118956	0.273958	0.650559	-0.620248	insig
MW0149847	Gln-Tyr-Trp	Amino acids and derivatives	Amino acids and derivatives	C25H29N5O6	2	0.7521	-	194325	153003	190164	88863.4	97042	4554.79	0.92601	0.0427398	0.137511	2.82207	1.49675	insig
MW0149854	Gln-Val-Gln	Amino acids and derivatives	Amino acids and derivatives	C15H27N5O6	2	0.7516	-	48127.9	41433.5	47346.5	28568.4	29452.6	23567.3	1.38768	0.00293988	0.0260518	1.67803	0.746772	insig
MW0145264	Arg-Arg-Phe	Amino acids and derivatives	Amino acids and derivatives	C21H35N9O4	2	0.7514	-	5855.55	6961.77	6069.75	7453.56	14373.9	9901.66	1.13209	0.165761	0.337892	0.59526	-0.748408	insig
MW0158262	Trp-Trp-Asp	Amino acids and derivatives	Amino acids and derivatives	C26H27N5O6	2	0.7513	-	23834.9	27539.1	24902.4	15933.8	15723.9	22384	1.20025	0.0575408	0.167633	1.41144	0.497164	insig
MW0109603	Ser-Ala-Lys	Amino acids and derivatives	Amino acids and derivatives	C12H24N4O5	2	0.751	-	280.01	141.4	559.44	371.56	1488.31	618.74	0.914702	0.275792	0.465226	0.395726	-1.33743	insig
MW0105574	Propionic acid, 2-amino-3-ureido-	Organic acids	Organic acids	C4H9N3O3	2	0.7508	-	13920.2	12355.1	12707	20391.4	20751.5	20200.1	1.44015	0.00180257	0.0197499	0.63548	-0.654081	insig
MW0144585	Ala-His-Ala	Amino acids and derivatives	Amino acids and derivatives	C12H19N5O4	2	0.7508	-	29591.2	46415.9	39956.1	16013	2038.21	15572.2	1.08961	0.0151174	0.0704662	3.44888	1.78613	up
MW0159131	Val-Phe-Tyr	Amino acids and derivatives	Amino acids and derivatives	C23H29N3O5	2	0.7506	-	290.21	166.49	231.05	479.55	426.2	547	1.32542	0.00698137	0.0446662	0.473412	-1.07883	down
MW0150884	His-Cys-Gln	Amino acids and derivatives	Amino acids and derivatives	C14H22N6O5S1	2	0.7505	-	30918	19659.9	33286.8	9104.26	11393.8	8423.79	1.37313	0.0435667	0.138862	2.8997	1.5359	up
MW0151051	His-Phe-Ser	Amino acids and derivatives	Amino acids and derivatives	C18H23N5O5	2	0.7499	-	186737	171196	186828	131085	127727	129063	1.43658	0.00799395	0.0485416	1.40447	0.490028	insig
MW0151027	His-Met-Gly	Amino acids and derivatives	Amino acids and derivatives	C13H21N5O4S1	2	0.7496	-	27441.2	12965.7	18612.5	1281.86	19650.5	17443.2	0.645064	0.395722	0.579147	1.53794	0.621003	insig
MW0150100	Glu-Phe-Glu	Amino acids and derivatives	Amino acids and derivatives	C19H25N3O8	2	0.749	-	890.84	321.41	186.11	2693.73	402.15	926.27	0.822276	0.334255	0.520756	0.347665	-1.52423	insig
MW0144704	Ala-Pro-Ala	Amino acids and derivatives	Amino acids and derivatives	C11H19N3O4	2	0.7487	-	32627.7	33769.8	48304	134761	158979	142790	1.43094	0.000452215	0.00985341	0.262757	-1.9282	down
MW0149786	Gln-Phe-Trp	Amino acids and derivatives	Amino acids and derivatives	C25H29N5O5	2	0.7484	-	2.42329e+06	2.56729e+06	2.49296e+06	2.3083e+06	2.07189e+06	2.28982e+06	1.21534	0.0496692	0.151717	1.12197	0.166032	insig
MW0155758	Pro-Ala-Asn	Amino acids and derivatives	Amino acids and derivatives	C12H20N4O5	2	0.7484	-	2556.18	21514.3	430.78	1513.15	2311.18	3475.46	0.140004	0.482633	0.64758	3.35644	1.74693	insig
MW0048990	[(2R,3R,4S,5R,6S,8S,13S,16S,17R)-11-ethyl-8,16-dihydroxy-6-methoxy-13-(methoxymethyl)-11-azahexacyclo[7.7.2.12,5.01,10.03,8.013,17]nonadecan-4-yl] acetate	Others	Lactones	C25H39NO6	2	0.748	-	279154	298171	285545	149276	201411	192163	1.35306	0.0140956	0.0671299	1.58952	0.668589	insig
MW0153708	Met-Tyr-Tyr	Amino acids and derivatives	Amino acids and derivatives	C23H29N3O6S1	2	0.7479	-	1396.51	915.41	920.94	3583.43	4772.47	6104.07	1.4056	0.0309533	0.111631	0.223573	-2.16118	down
MW0155156	Phe-Gln-Asn	Amino acids and derivatives	Amino acids and derivatives	C18H25N5O6	2	0.7467	-	50363.3	46993.4	21834.5	69338.2	62909.8	63324	1.04954	0.0987623	0.241193	0.609449	-0.714422	insig
MW0132617	5-Hydroxypseudobaptigenin	Heterocyclic compounds	Heterocyclic compounds	C16H10O6	2	0.7461	-	8168.19	12026.1	13191.3	26008.1	23066.1	23510.4	1.36353	0.00376297	0.0301636	0.459954	-1.12044	down
MW0155190	Phe-Glu-Trp	Amino acids and derivatives	Amino acids and derivatives	C25H28N4O6	2	0.746	-	288.82	706.02	465.29	315.29	365.92	315.1	0.757903	0.328809	0.515658	1.46554	0.55143	insig
MW0108727	N-cis-octadec-9Z-enoyl-L-Homoserine lactone	Others	Lactones	C22H39NO3	2	0.7451	-	577.38	299.43	844.76	1172.42	2260.15	1931.29	1.24552	0.0450238	0.14164	0.320957	-1.63955	down
MW0158607	Tyr-Ser-Leu	Amino acids and derivatives	Amino acids and derivatives	C18H27N3O6	2	0.7449	-	514.14	793.93	1392.84	1460.83	1450.78	1271.81	0.969103	0.191777	0.371753	0.645622	-0.631237	insig
MW0168284	6,9,12,15-Octadecatetraenoic acid methyl ester	FA	Others	C19H30O2	2	0.7447	-	39866.5	39008.1	40854.1	38786.7	29219.1	37750	0.854699	0.262356	0.449944	1.13212	0.179032	insig
MW0156905	Ser-Ser-Cys	Amino acids and derivatives	Amino acids and derivatives	C9H17N3O6S1	2	0.7442	-	461393	443498	436505	467702	429818	418711	0.374984	0.648374	0.777124	1.01912	0.0273217	insig
MW0155890	Pro-Ile-Asn	Amino acids and derivatives	Amino acids and derivatives	C15H26N4O5	2	0.7433	-	109456	89326.4	81495.2	125079	138708	123465	1.26527	0.0304759	0.110403	0.723762	-0.466413	insig
MW0138022	7,3'-Dihydroxy-8,2',4'-trimethoxyisoflavan	Heterocyclic compounds	Heterocyclic compounds	C18H20O6	2	0.7433	-	10594.3	8994.19	5192.39	6833.24	15964.3	1738.51	0.333178	0.986719	0.993151	1.00998	0.0143238	insig
MW0146300	Asp-Tyr-Glu	Amino acids and derivatives	Amino acids and derivatives	C18H23N3O9	2	0.7431	-	676.46	960.52	1151.45	489.27	935.19	675.91	0.754239	0.292172	0.482527	1.32759	0.40881	insig
MW0150181	Glu-Tyr-Ala	Amino acids and derivatives	Amino acids and derivatives	C17H23N3O7	2	0.7427	-	17448.4	13560.8	18127.3	10703.5	14042.5	17363.2	0.64785	0.387206	0.572178	1.16688	0.222656	insig
MW0159158	Val-Ser-His	Amino acids and derivatives	Amino acids and derivatives	C14H23N5O5	2	0.7427	-	12287.2	12781	8004.38	33096.6	32308.2	30361.9	1.40463	0.00108969	0.0149291	0.345345	-1.53389	down
MW0146085	Asp-Gln-Met	Amino acids and derivatives	Amino acids and derivatives	C14H24N4O7S1	2	0.7405	-	1301.97	292.97	1772.3	1089.57	670.7	405.93	0.313062	0.469141	0.636466	1.55445	0.6364	insig
MW0158135	Trp-Gln-Met	Amino acids and derivatives	Amino acids and derivatives	C21H29N5O5S1	2	0.7397	-	43967	101719	95161.1	59701.2	77308.1	80191.4	0.118692	0.716196	0.821771	1.10887	0.149088	insig
MW0155941	Pro-Met-Glu	Amino acids and derivatives	Amino acids and derivatives	C15H25N3O6S1	2	0.7381	-	2695.09	2565.4	3316.04	1416.93	2690.03	9421.37	0.192584	0.57513	0.719393	0.633968	-0.657518	insig
MW0155312	Phe-Pro-Cys	Amino acids and derivatives	Amino acids and derivatives	C17H23N3O4S1	2	0.7377	-	231.66	50.29	1933.22	4551.6	6314.46	4891.76	1.17877	0.0051754	0.0368029	0.140576	-2.83058	down
MW0151023	His-Met-Asn	Amino acids and derivatives	Amino acids and derivatives	C15H24N6O5S1	2	0.7375	-	3884.56	1193.3	1475.28	2862.62	2275.44	681.35	0.181552	0.831797	0.900834	1.12608	0.171313	insig
MW0157746	Thr-Met-Phe	Amino acids and derivatives	Amino acids and derivatives	C18H27N3O5S1	2	0.7371	-	1442.36	252.93	1412.79	1676.6	3074.33	2179.03	0.94622	0.0877293	0.22416	0.448499	-1.15682	insig
MW0110224	Tyr-Trp-Lys	Amino acids and derivatives	Amino acids and derivatives	C26H33N5O5	2	0.7371	-	9559.81	26127.3	35316.6	12974.9	50678.5	44218.9	0.46883	0.433324	0.606864	0.658219	-0.603359	insig
MW0158226	Trp-Pro-Glu	Amino acids and derivatives	Amino acids and derivatives	C21H26N4O6	2	0.7371	-	8113.22	8375.65	90.12	12274.7	19089.3	19262.4	0.858059	0.0346301	0.120995	0.327477	-1.61054	insig
MW0156046	Pro-Val-Glu	Amino acids and derivatives	Amino acids and derivatives	C15H25N3O6	2	0.7362	-	3375.91	5747.71	5962.53	8335.26	8856.94	8646.18	1.22406	0.0455168	0.142709	0.583866	-0.776291	insig
MW0145842	Asn-Met-His	Amino acids and derivatives	Amino acids and derivatives	C15H24N6O5S1	2	0.7356	-	100198	98087.6	91438.4	66647.3	21966.7	66229.4	1.03355	0.089378	0.227078	1.87108	0.903869	insig
MW0145939	Asn-Tyr-Tyr	Amino acids and derivatives	Amino acids and derivatives	C22H26N4O7	2	0.7354	-	1878.14	5685.9	6741.95	8873.88	8827.43	15320.4	1.06348	0.0838848	0.217928	0.43323	-1.2068	down
MW0105680	Arg-Tyr-Arg	Amino acids and derivatives	Amino acids and derivatives	C21H35N9O5	2	0.7354	-	284.02	618.06	111.19	209.03	596.47	434.06	0.407021	0.707912	0.815282	0.817443	-0.290809	insig
MW0153668	Met-Ser-Tyr	Amino acids and derivatives	Amino acids and derivatives	C17H25N3O6S1	2	0.7349	-	17976.1	20141.8	21211.8	28301.3	32323.2	31709	1.40154	0.00282192	0.0255112	0.642559	-0.638099	insig
MW0117861	2,3-Methylenedioxymethcathinone	Others	Ketone compounds	C11H13NO3	2	0.7346	-	120.07	1018.7	2531.5	813.57	5027.46	5471.98	0.79582	0.223189	0.407266	0.324429	-1.62402	insig
MW0106266	Cys-Pro-Lys	Amino acids and derivatives	Amino acids and derivatives	C14H26N4O4S1	2	0.7342	-	701.59	278.49	3120.57	10465.2	11383.3	9852.05	1.27337	0.00282986	0.0255257	0.129356	-2.95058	down
MW0114796	Malyngamide J	Alcohol and amines	Amines	C33H53NO9	2	0.7329	-	1623.89	17.46	13.1	79.54	1386.12	122.87	0.461906	0.976066	0.987547	1.0415	0.0586594	insig
MW0156670	Ser-Asn-Tyr	Amino acids and derivatives	Amino acids and derivatives	C16H22N4O7	2	0.7317	-	13383.7	13013.5	10244	9056.64	8800.02	22379.3	0.000429174	0.816619	0.892305	0.910656	-0.135022	insig
MW0150089	Glu-Met-Glu	Amino acids and derivatives	Amino acids and derivatives	C15H25N3O8S1	2	0.7306	-	51787.9	58314.5	49778.8	55237.2	52397	41515.1	0.511418	0.51434	0.671139	1.07195	0.100242	insig
MW0151617	Ile-Trp-Thr	Amino acids and derivatives	Amino acids and derivatives	C21H30N4O5	2	0.7296	-	88192.6	234167	137951	170917	136231	206316	0.39834	0.734524	0.835902	0.89648	-0.157656	insig
MW0137930	Deoxysappanone B 7,3'-dimethyl ether acetate	Others	Ketone compounds	C20H20O6	2	0.7293	-	16621.1	14009.1	13103.9	5282.78	6685.13	3463.29	1.36266	0.00271896	0.0249155	2.83414	1.50291	up
MW0158400	Tyr-Asn-Ser	Amino acids and derivatives	Amino acids and derivatives	C16H22N4O7	2	0.7291	-	7295.86	7370.44	8485.28	4178.05	5963.72	2200.76	1.11835	0.0668718	0.185366	1.87576	0.907473	insig
MW0149947	Glu-Asp-His	Amino acids and derivatives	Amino acids and derivatives	C15H21N5O8	2	0.729	-	17847.5	20477.7	19905.8	36990.6	36569	37993	1.44617	0.00026553	0.00764727	0.522006	-0.937863	insig
MW0156841	Ser-Lys-Gly	Amino acids and derivatives	Amino acids and derivatives	C11H22N4O5	2	0.728	-	8.15	802.6	1300.18	13967.7	10475.9	8509	1.12901	0.0188303	0.0817651	0.0640596	-3.96444	down
MW0058181	1-(9Z-heptadecenoyl)-sn-glycero-3-phosphoethanolamine	GP	PE	C22H44NO7P	2	0.7266	-	492.38	44.84	654.28	1385.48	484.69	1396.28	0.879932	0.136765	0.297912	0.364769	-1.45494	insig
MW0157785	Thr-Pro-Phe	Amino acids and derivatives	Amino acids and derivatives	C18H25N3O5	2	0.7266	-	11773.7	11918.5	10553	14896.7	5287.61	9127.38	0.541414	0.617087	0.7526	1.16831	0.224421	insig
MW0103515	[(2R,5R)-5-(4-amino-2-oxopyrimidin-1-yl)-4-hydroxy-2-(hydroxymethyl)oxolan-3-yl] dihydrogen phosphate	Nucleotides and derivatives	Nucleotides and derivatives	C9H14N3O8P	2	0.7257	-	1.52748e+06	1.55994e+06	1.31928e+06	1.65921e+06	1.52006e+06	1.61196e+06	0.860361	0.229537	0.413905	0.919744	-0.120696	insig
MW0155986	Pro-Pro-Val	Amino acids and derivatives	Amino acids and derivatives	C15H25N3O4	2	0.7255	-	7007.54	9306.41	10453.7	18432.9	18629.9	13280.7	1.29796	0.0268442	0.10159	0.531699	-0.911317	insig
MW0144600	Ala-His-Thr	Amino acids and derivatives	Amino acids and derivatives	C13H21N5O5	2	0.7255	-	34686.8	21388.1	35643	27839.8	15182.5	25489.7	0.746025	0.270153	0.459303	1.33871	0.420847	insig
MW0002109	2,3,4-Trihydroxy-4'-ethoxybenzophenone	Benzene and substituted derivatives	Benzene and substituted derivatives	C15H14O5	2	0.7248	-	1.17399e+06	1.25063e+06	1.0238e+06	1.11088e+06	1.08308e+06	1.17866e+06	0.218555	0.752557	0.849947	1.02247	0.0320626	insig
MW0150812	His-Ala-Gln-Lys	Amino acids and derivatives	Amino acids and derivatives	C20H34N8O6	2	0.7248	-	2438.98	2407.24	2257.73	2668.81	1914.37	1333.93	0.703033	0.413921	0.592006	1.20058	0.263729	insig
MW0144584	Ala-Gly-Val	Amino acids and derivatives	Amino acids and derivatives	C10H19N3O4	2	0.7247	-	27189.1	27654.9	27914.5	26057.6	22174.4	12857.5	0.917919	0.20616	0.39062	1.35471	0.437983	insig
MW0155303	Phe-Phe-Leu	Amino acids and derivatives	Amino acids and derivatives	C24H31N3O4	2	0.7244	-	42319.7	41588.8	21418.5	45050.8	45251.2	12816.5	0.185838	0.957263	0.977135	1.02142	0.0305728	insig
MW0158560	Tyr-Met-Tyr	Amino acids and derivatives	Amino acids and derivatives	C23H29N3O6S1	2	0.7237	-	60128.2	57675.5	56464.9	60212.3	55339.1	49184.7	0.633981	0.428847	0.602244	1.05787	0.0811556	insig
MW0109342	Pro-Val-Arg	Amino acids and derivatives	Amino acids and derivatives	C16H30N6O4	2	0.7232	-	4400.44	1875.16	640.84	3566.59	955.26	953.83	0.166105	0.751086	0.849237	1.26312	0.336992	insig
MW0147991	Cys-Asp-His	Amino acids and derivatives	Amino acids and derivatives	C13H19N5O6S1	2	0.7227	-	89497.1	81536.1	44126.2	20137.4	57897.7	92465.3	0.497717	0.589884	0.730919	1.26193	0.335631	insig
MW0146299	Asp-Tyr-Gln	Amino acids and derivatives	Amino acids and derivatives	C18H24N4O8	2	0.7209	-	2224.54	28.13	480.11	97.68	244.96	243.42	0.29659	0.397155	0.579771	4.66297	2.22125	insig
MW0169452	Marmesin acetate	Benzene and substituted derivatives	Benzene and substituted derivatives	C16H16O5	2	0.7208	-	112.4	6186.8	288.06	62.86	377.58	493.36	0.475675	0.444886	0.616844	7.05425	2.81849	insig
MW0153634	Met-Phe-Phe	Amino acids and derivatives	Amino acids and derivatives	C23H29N3O4S1	2	0.7201	-	55969.4	59682.9	62114.1	2216.1	11395.1	7562.7	1.34351	0.000201227	0.0065027	8.39556	3.06963	up
MW0146207	Asp-Met-His	Amino acids and derivatives	Amino acids and derivatives	C15H23N5O6S	2	0.7198	-	13921.3	11430.7	8372.52	11009.9	11668.4	10125.6	0.0380092	0.868789	0.926218	1.02806	0.0399253	insig
MW0146184	Asp-Lys-Asp	Amino acids and derivatives	Amino acids and derivatives	C14H24N4O8	2	0.719	-	180545	169207	192133	188997	188855	193308	0.852069	0.2761	0.465226	0.948745	-0.0759078	insig
MW0150883	His-Cys-Asp	Amino acids and derivatives	Amino acids and derivatives	C13H19N5O6S1	2	0.7185	-	776967	750318	738459	833065	789693	807283	1.24147	0.0325772	0.115728	0.93239	-0.100995	insig
MW0148047	Cys-Met-Ser	Amino acids and derivatives	Amino acids and derivatives	C11H21N3O5S2	2	0.7177	-	6917.7	30121.5	20270.8	7770.12	45893.6	38180.8	0.384348	0.451054	0.62176	0.623988	-0.680409	insig
MW0150879	His-Asp-Tyr	Amino acids and derivatives	Amino acids and derivatives	C19H23N5O7	2	0.7175	-	3178.43	4451.9	3810.89	3696.65	3917.33	6825.1	0.612306	0.431959	0.605373	0.792379	-0.335738	insig
MW0138535	Isorhapontin	Heterocyclic compounds	Heterocyclic compounds	C21H24O9	2	0.7167	-	14856.1	13607.6	13062.6	7316.62	13257.4	7872.33	1.07161	0.139665	0.30227	1.45981	0.545784	insig
MW0107457	Ile-Phe-Lys	Amino acids and derivatives	Amino acids and derivatives	C21H34N4O4	2	0.7162	-	902745	897360	884383	1.76356e+06	1.59597e+06	1.55449e+06	1.44691	0.00699017	0.0446662	0.546291	-0.872259	insig
MW0158401	Tyr-Asn-Trp	Amino acids and derivatives	Amino acids and derivatives	C24H27N5O6	2	0.7158	-	8734.14	8810.44	5525.23	9095.46	7021.01	8971.11	0.39695	0.630632	0.763118	0.919571	-0.120967	insig
MW0109128	Phe-Pro-Ala	Amino acids and derivatives	Amino acids and derivatives	C17H23N3O4	2	0.7147	-	51384.8	39344.2	47221.3	49008.3	44767.1	56959	0.570751	0.44405	0.616177	0.915188	-0.12786	insig
MW0150119	Glu-Pro-Asp	Amino acids and derivatives	Amino acids and derivatives	C14H21N3O8	2	0.7144	-	51460.2	51139.4	48510.3	44945.4	42934.4	41218.8	1.35652	0.00713212	0.0450732	1.1705	0.227125	insig
MW0151127	His-Tyr-Glu	Amino acids and derivatives	Amino acids and derivatives	C20H25N5O7	2	0.712	-	2108226	2.36437e+06	2.25306e+06	1.80919e+06	1.8025e+06	1.84239e+06	1.38738	0.0265738	0.100929	1.23314	0.302341	insig
MW0150334	Gly-Cys-Asp	Amino acids and derivatives	Amino acids and derivatives	C9H15N3O6S1	2	0.7117	-	105639	77024.9	50827.8	88158.4	97993.1	98207.1	0.710223	0.396774	0.579771	0.821117	-0.28434	insig
MW0108165	Met-Lys-Lys	Amino acids and derivatives	Amino acids and derivatives	C17H35N5O4S1	2	0.7117	-	46332.2	48912.8	50299.8	45525	39905.8	46282.7	1.01147	0.135612	0.29588	1.10501	0.14406	insig
MW0109125	Phe-Phe-Asp	Amino acids and derivatives	Amino acids and derivatives	C22H25N3O6	2	0.7115	-	4118.83	3870.4	6056	13876.4	5769.23	5150.15	0.840759	0.329706	0.516462	0.566436	-0.820014	insig
MW0106265	Cys-Phe-Lys	Amino acids and derivatives	Amino acids and derivatives	C18H28N4O4S1	2	0.7115	-	79.26	49.64	14.82	28.67	101.45	3.98	0.35728	0.931526	0.963334	1.07174	0.0999516	insig
MW0153660	Met-Ser-His	Amino acids and derivatives	Amino acids and derivatives	C14H23N5O5S1	2	0.7115	-	23641.3	24303.2	24332.2	21841.4	17886.6	24636.5	0.806509	0.3098	0.499199	1.12293	0.167268	insig
MW0123471	9H-Pyrrolo[1',2':2,3]isoindolo[4,5,6-cd]indol-9-one, 10-acetyl-2,6,6a,7,11a,11b-hexahydro-11-hydroxy-7,7-dimethyl-, (6aR,11aS,11bR)-	Organic acids	Organic acids	C20H20N2O3	2	0.7114	-	38454.4	37034.7	43081.3	24305	23578.4	26332.4	1.41858	0.00661032	0.0428502	1.59765	0.675948	insig
MW0153130	Lys-Ser-Gly	Amino acids and derivatives	Amino acids and derivatives	C11H22N4O5	2	0.7112	-	119021	120063	117978	121634	126128	137750	1.03667	0.185214	0.363781	0.926203	-0.110599	insig
MW0151100	His-Thr-Phe	Amino acids and derivatives	Amino acids and derivatives	C19H25N5O5	2	0.7105	-	9684	13534.3	2339.23	12575.7	13374.4	10808.8	0.70045	0.373722	0.559959	0.695274	-0.524347	insig
MW0155914	Pro-Leu-Met	Amino acids and derivatives	Amino acids and derivatives	C16H29N3O4S1	2	0.71	-	48640.6	48691.7	51027.8	80066.3	73169.9	80985.6	1.44126	0.00406554	0.0316179	0.633417	-0.658772	insig
MW0110082	Trp-Thr	Amino acids and derivatives	Amino acids and derivatives	C15H19N3O4	2	0.7085	-	351884	159676	229040	456554	435378	449698	1.19053	0.0687535	0.188977	0.552015	-0.857221	insig
MW0109633	Ser-Pro-Lys	Amino acids and derivatives	Amino acids and derivatives	C14H26N4O5	2	0.706	-	840.15	3059.73	646.77	4098.83	3535.76	4783.23	1.14725	0.0588172	0.170245	0.366139	-1.44954	down
MW0157674	Thr-Ile-Ala	Amino acids and derivatives	Amino acids and derivatives	C13H25N3O5	2	0.7056	-	2501.69	2132.18	1564.63	2841.39	1674.29	849.76	0.446997	0.694599	0.806167	1.15526	0.208223	insig
MW0150923	His-Glu-Met	Amino acids and derivatives	Amino acids and derivatives	C16H25N5O6S1	2	0.7051	-	3840.51	4455.88	993.89	11896.4	9540.38	9171.53	1.19166	0.0073884	0.0462578	0.303522	-1.72013	down
MW0150528	Gly-Val-Asn	Amino acids and derivatives	Amino acids and derivatives	C11H20N4O5	2	0.7044	-	792527	806209	800187	640371	653055	618791	1.44372	0.00130102	0.0165479	1.25452	0.327141	insig
MW0110198	Tyr-Glu-Leu	Amino acids and derivatives	Amino acids and derivatives	C20H29N3O7	2	0.7042	-	13708.2	15191.5	16824.3	9961.95	8172.63	6333.86	1.33031	0.00725857	0.0455865	1.86869	0.902028	insig
MW0144543	Ala-Gln-Leu	Amino acids and derivatives	Amino acids and derivatives	C14H26N4O5	2	0.7029	-	42700.6	44338.8	43689.6	231719	221427	204104	1.45727	0.00203801	0.0210639	0.198903	-2.32986	down
MW0158422	Tyr-Cys-Cys	Amino acids and derivatives	Amino acids and derivatives	C15H21N3O5S2	2	0.7015	-	895.7	1967.01	2049.84	9652.27	8255.46	7280.45	1.38446	0.00296387	0.0260924	0.195034	-2.3582	down
MW0157599	Thr-Cys-Gly	Amino acids and derivatives	Amino acids and derivatives	C9H17N3O5S1	2	0.7014	-	31575.8	33142	35903.8	24025.7	21937.2	24587.9	1.4019	0.00458888	0.0341168	1.42623	0.512206	insig
MW0153525	Met-Cys-His	Amino acids and derivatives	Amino acids and derivatives	C14H23N5O4S2	2	0.7007	-	289.72	2659.48	252.71	129.53	237.91	4730.08	0.0523149	0.736406	0.837099	0.628131	-0.670863	insig
MW0156053	Pro-Val-Phe	Amino acids and derivatives	Amino acids and derivatives	C19H27N3O4	2	0.7002	-	14374.8	7030.06	13807.8	4850.54	12022	6777.19	0.747395	0.293703	0.483352	1.48893	0.574275	insig
MW0159152	Val-Ser-Gln	Amino acids and derivatives	Amino acids and derivatives	C13H24N4O6	2	0.7001	-	7251.88	1344.2	2352.01	996.71	47390.9	30217.2	0.67662	0.236312	0.421971	0.13928	-2.84394	insig
MW0012813	[(2R)-3-hexadecanoyloxy-2-[(6E,9E)-octadeca-6,9-dienoyl]oxypropyl] 2-(trimethylazaniumyl)ethyl phosphate	GP	PC	C42H80NO8P	3	0.9949	-	94669.6	190796	326738	2.21613e+06	353348	386513	0.999973	0.3317	0.517887	0.207106	-2.27156	insig
MW0010669	4-[5-(4-Hydroxy-3,5-dimethoxyphenyl)-3,4-bis(hydroxymethyl)oxolan-2-yl]-2,6-dimethoxyphenol	Lignans and Coumarins	Lignans	C22H28O9	3	0.9813	-	279.13	150.7	512.15	77.4	569.58	916.43	0.181951	0.497142	0.657146	0.602516	-0.730928	insig
ZINC85921663	Thelephantin J	Benzene and substituted derivatives	Benzene and substituted derivatives	C32H22O8	3	0.9757	-	937248	1.65896e+06	1.58489e+06	1.63576e+06	1.10378e+06	1.90804e+06	0.323769	0.661245	0.783928	0.899628	-0.1526	insig
MW0003109	[(2R,3S,4S,5R,6S)-3,4,5-trihydroxy-6-[2-hydroxy-4,4,6,6-tetramethyl-2-(2-methylprop-1-enyl)-3,5-dioxocyclohexyl]oxyoxan-2-yl]methyl 3,4,5-trihydroxybenzoate	Benzene and substituted derivatives	Benzene and substituted derivatives	C27H36O13	3	0.9746	-	1012.78	2470.43	2378.34	564.87	2961.4	1521.68	0.355568	0.765338	0.858937	1.16117	0.215585	insig
MW0166260	[(2S)-2-[(9Z,12E,15Z)-octadeca-9,12,15-trienoyl]oxy-3-[(2R,3R,4S,5R,6R)-3,4,5-trihydroxy-6-[[(2R,3R,4S,5R,6R)-3,4,5-trihydroxy-6-(hydroxymethyl)oxan-2-yl]oxymethyl]oxan-2-yl]oxypropyl] (9Z,12Z,15Z)-octadeca-9,12,15-trienoate	GL	TG	C51H84O15	3	0.9734	-	462163	223808	283016	434803	173865	236214	0.340282	0.717431	0.82272	1.14689	0.197725	insig
MW0160607	azanium;[(2S)-2,3-dihydroxypropyl] [(2R)-2,3-di(tetradecanoyloxy)propyl] phosphate	GP	PA	C34H70NO10P	3	0.9558	-	173.94	716.02	995.65	3519.05	1434.57	580.76	0.841816	0.29615	0.485754	0.340708	-1.55339	insig
ZINC85490309	1,3-Bis(24-methyl-5,7,18,20-tetraoxa-24-azoniahexacyclo[11.11.0.02,10.04,8.014,22.017,21]tetracosa-1(13),2,4(8),9,11,14(22),15,17(21)-octaen-24-yl)propan-2-one	Alkaloids	Alkaloids	C43H34N2O9+2	3	0.9528	-	79547.3	148907	117526	208050	109040	110156	0.47774	0.527575	0.682226	0.809792	-0.304377	insig
MW0013097	6-[2,3-dihydroxy-3-methyl-1-[(2R,3R,4S,5S,6R)-3,4,5-trihydroxy-6-(hydroxymethyl)oxan-2-yl]oxybutyl]-7-methoxychromen-2-one	Others	Saccharides	C21H28O11	3	0.9402	-	73987.8	77036.6	74651.2	158976	136532	151597	1.44545	0.00702865	0.0446823	0.504749	-0.986363	insig
MW0166240	cytosyl-4'-oxo-beta-D-glucuronate	Organic acids	Organic acids	C10H10N3O7-	3	0.9344	-	162322	159594	167178	243177	241786	240322	1.45531	0.000200506	0.0065027	0.674348	-0.568435	insig
MW0145393	Arg-Ile-Ile	Amino acids and derivatives	Amino acids and derivatives	C18H36N6O4	3	0.9306	-	771709	810993	878768	720481	755511	789392	0.970759	0.165294	0.337473	1.08656	0.119764	insig
MW0012301	NCGC00380960-01_C30H50O6_13,17,24,25-Tetrahydroxy-16,23-epoxydammaran-3-one	Others	Ketone compounds	C30H50O6	3	0.9211	-	12946.3	17483.8	18558.3	18986.5	23647.1	29014.8	1.09663	0.10383	0.249856	0.683732	-0.548496	insig
MW0011753	[4,5-dihydroxy-3,4-bis(hydroxymethyl)-4a,8,8-trimethyl-5,6,7,8a-tetrahydro-1H-naphthalen-1-yl] octanoate	Others	Lactones	C23H40O6	3	0.9174	-	171024	138045	184023	115206	128095	111306	1.25497	0.0636301	0.179034	1.39053	0.475639	insig
ZINC95910092	(25S)-5alpha-Cholestane-3beta,6alpha,7alpha,8,15alpha,16beta,26-heptaol	Alcohol and amines	Alcohols	C27H48O7	3	0.9066	-	6.43118e+06	6.21134e+06	6.23646e+06	7.76389e+06	7.44873e+06	6.85668e+06	1.30886	0.0493702	0.151168	0.855441	-0.22526	insig
MEDP1166	1-Palmitoyl-2-acetyl-sn-glycero-3-phosphocholine	GP	PC	C26H52NO8P	3	0.8892	-	23567.5	26228.3	12074.5	69145.2	54977.5	60121.2	1.33455	0.0024661	0.0234512	0.335806	-1.5743	down
MEDP1343	LPC(0:0/18:3)	Lipids	LPC	C26H49NO7P	3	0.8863	-	2.8651e+06	2.5556e+06	2.57018e+06	3.63282e+06	3.42931e+06	3.25811e+06	1.36366	0.00639816	0.0421526	0.774292	-0.36905	insig
MW0160467	Phosphonatoenolpyruvate	Alcohol and amines	Amines	C3H2O6P-3	3	0.8846	-	114542	135255	110490	135044	214570	199760	1.15486	0.112279	0.262897	0.655815	-0.608639	insig
MW0165285	Vitexin 2''-O-beta-L-rhamnoside	Flavonoids	Flavones	C27H29O14-	3	0.8767	-	1.09936e+06	1.15435e+06	1.103e+06	1.13769e+06	1.14356e+06	1.15097e+06	0.835138	0.290205	0.479944	0.977997	-0.0320979	insig
ZINC85511153	[(2R,3R,4R,5S,6S)-2-[[(2S,4S,5R,6S)-4,5-dihydroxy-6-[5-hydroxy-2-(4-methoxyphenyl)-4-oxochromen-7-yl]oxyoxan-2-yl]methoxy]-3,5-dihydroxy-6-methyloxan-4-yl] 3-methylbutanoate	Others	Lactones	C33H40O14	3	0.8639	-	3251.57	631.11	1054.46	6605.65	3828.24	6195.09	1.18391	0.0305808	0.110585	0.2969	-1.75195	down
ZINC85493813	2-(1,7-Dihydroxy-6,8-dimethoxy-3-methyl-5-propan-2-ylnaphthalen-2-yl)-6,8-dimethoxy-3-methyl-5-propan-2-ylnaphthalene-1,7-diol	Benzene and substituted derivatives	Benzene and substituted derivatives	C32H38O8	3	0.8373	-	288593	298260	298981	225563	215967	198183	1.41772	0.00395861	0.0311506	1.38473	0.469609	insig
ZINC49605578	Curtisian E	Benzene and substituted derivatives	Benzene and substituted derivatives	C37H36O12	3	0.8365	-	192698	158028	164930	184020	166042	177352	0.269425	0.762596	0.857829	0.977706	-0.0325268	insig
MW0141494	16-Oxosteroid	Others	Ketone compounds	C19H30O2	3	0.8361	-	222424	362236	373285	209083	213211	684991	0.0086181	0.787606	0.871947	0.865129	-0.209013	insig
MEDN1212	7alpha,12beta-Dihydroxy-5alpha-cholan-24-oic Acid	Tryptamines,Cholines,Pigments	Cholines	C24H40O4	3	0.8164	-	90397.9	107482	9345.12	26366.7	31063.6	2915.74	0.706413	0.242897	0.429121	3.43395	1.77987	insig
ZINC85948878	Deoxycalyxin A 3'-hydroperoxide	Others	Ketone compounds	C35H34O9	3	0.8101	-	33567.2	60635.6	19875.8	3030.58	48544	13172.7	0.737789	0.419875	0.595266	1.76191	0.817138	insig
MEDP1446	Octadecadienamide	Alcohol and amines	Amines	C18H33NO	3	0.8075	-	13571.1	8764.48	17589.2	41504.4	16315.6	62941.5	1.08879	0.179789	0.356868	0.330609	-1.5968	down
ZINC43120336	[2,5-dihydroxy-3,6-bis(4-hydroxyphenyl)-4-(3-phenylpropanoyloxy)phenyl] (3S)-3-hydroxybutanoate	Benzene and substituted derivatives	Benzene and substituted derivatives	C31H28O9	3	0.797	-	414878	348857	385708	346305	296566	297216	1.18756	0.0517185	0.155735	1.2227	0.290068	insig
MW0146838	Bouillonamide A	Amino acids and derivatives	Amino acids and derivatives	C46H67N5O8	3	0.7877	-	156254	95740.9	72722.7	349519	355171	155238	1.17436	0.0990688	0.241795	0.377611	-1.40503	down
MW0147486	Cimigenol	Alcohol and amines	Alcohols	C30H48O5	3	0.7816	-	10741.5	8674.26	10673.8	13913.5	17994.7	10298.8	0.977886	0.20443	0.388071	0.712905	-0.488219	insig
MW0146409	Atractyloside D	Terpenoids	Sesquiterpenoids	C27H46O12	3	0.7807	-	17394.5	22390.8	21813	10445	11139.4	9659.91	1.40939	0.0178644	0.0794575	1.97151	0.9793	insig
MW0143096	3-Oxo-delta5-steroid	Others	Ketone compounds	C19H28O	3	0.7754	-	199556	226726	233992	159433	159442	217515	1.00279	0.15496	0.323203	1.23096	0.299784	insig
MW0129657	1,3,4-trihydroxy-5-[(E)-3-[2-(4-hydroxy-3-methoxyphenyl)-3-(hydroxymethyl)-7-methoxy-2,3-dihydro-1-benzofuran-5-yl]prop-2-enoyl]oxycyclohexane-1-carboxylic acid	Organic acids	Organic acids	C27H30O12	3	0.7701	-	338592	320280	316020	510856	468789	434084	1.40531	0.0154967	0.0719849	0.68959	-0.53619	insig
MW0011336	(3S,5R,8R,10R,13R,14S,17R)-3-[5-[(2S,3R,4R,5S,6R)-3,4-dihydroxy-6-(hydroxymethyl)-5-[(2S,3R,4S,5S,6R)-3,4,5-trihydroxy-6-(hydroxymethyl)oxan-2-yl]oxyoxan-2-yl]oxy-4-methoxy-6-methyloxan-2-yl]oxy-14-hydroxy-13-methyl-17-(5-oxo-2H-furan-3-yl)-1,2,3,4,5,6,7,8,9,11,12,15,16,17-tetradecahydrocyclopenta[a]phenanthrene-10-carbaldehyde	Others	Lactones	C42H64O18	3	0.7672	-	24669.9	24095.1	10448.4	2741.28	838.86	3316.86	1.32534	0.0608394	0.174076	8.58538	3.10188	up
MEDP1331	LPC(0:0/20:3)	Lipids	LPC	C28H53NO7P	3	0.7619	-	24626.6	30188.5	25801.6	26149.3	17856.1	21497.8	0.948654	0.169414	0.343333	1.23073	0.299514	insig
MW0143095	3-oxo Delta(4)-steroid	Others	Ketone compounds	C19H28O	3	0.7574	-	4790	5385.92	5055.74	2832.62	4566.95	4057.72	1.0455	0.123139	0.280348	1.32943	0.410807	insig
MW0163212	di-trans,octa-cis-Undecaprenyl phosphate	Organic acids	Organic acids	C55H89O4P-2	3	0.7479	-	104.65	755.54	1476.63	9748.65	5192.09	10713.2	1.25807	0.0388418	0.129856	0.0910902	-3.45656	down
MW0149837	Gln-Tyr-Gln	Amino acids and derivatives	Amino acids and derivatives	C19H27N5O7	3	0.7472	-	72.34	1042.4	1495.04	584.76	1296.75	1185.14	0.482506	0.769031	0.860333	0.85102	-0.232735	insig
MW0000570	(2,5-Dibenzoyloxy-1,6-dihydroxycyclohex-3-en-1-yl)methyl benzoate	Benzene and substituted derivatives	Benzene and substituted derivatives	C28H24O8	3	0.744	-	8316.44	7330.63	6946.56	11818.4	11951.2	11185.7	1.41186	0.00242823	0.0231456	0.646358	-0.629595	insig
MW0151580	Ile-Ser-Met	Amino acids and derivatives	Amino acids and derivatives	C14H27N3O5S1	3	0.7412	-	254.35	369.61	377.26	244.72	195.96	568.17	0.182584	0.985109	0.992245	0.992437	-0.0109527	insig
MW0163756	[(2S)-2-azaniumyl-2-carboxyethyl] [(2R)-2,3-bis[[(Z)-octadec-9-enoyl]oxy]propyl] phosphate	GL	DG	C42H78NO10P	3	0.7395	-	98854.8	25422.5	20878.8	179083	19206	27970.1	0.172676	0.67248	0.7911	0.641548	-0.640372	insig
MW0011752	[4,5-dihydroxy-3,4-bis(hydroxymethyl)-4a,8,8-trimethyl-5,6,7,8a-tetrahydro-1H-naphthalen-1-yl] hexanoate	Others	Lactones	C21H36O6	3	0.7383	-	61672.6	60526.6	65533.6	39271.9	55359.5	77424.7	0.438919	0.68426	0.797842	1.09111	0.125801	insig
MW0164419	(4aR,12bR)-4a,7,8-trihydroxy-3-methyl-5,12b-dihydro-4H-benzo[a]anthracene-1,6-dione	Benzene and substituted derivatives	Benzene and substituted derivatives	C19H16O5	3	0.7361	-	22288.8	11672.4	14658.5	16441.8	9969.14	11663.3	0.630591	0.406914	0.587425	1.27697	0.352725	insig
MW0143553	5alpha-Ergosta-7,22-diene-3beta,5-diol	Alcohol and amines	Alcohols	C28H46O2	3	0.7346	-	663.15	838.46	596.18	802.66	2371.42	4379.4	1.0622	0.220552	0.405503	0.277725	-1.84827	down
MW0105689	Arginylasparagylarginine	Amino acids and derivatives	Amino acids and derivatives	C16H32N10O5	3	0.7342	-	225.19	195.34	71.01	39.89	97.01	228.63	0.467659	0.597406	0.738199	1.34473	0.427319	insig
ZINC49833052	(R)-N-[(1S,2R,3E,7Z)-1-[(beta-D-Glucopyranosyloxy)methyl]-2-hydroxy-3,7-heptadecadienyl]-2-hydroxyoctadecanamide	Alcohol and amines	Amines	C42H79NO9	3	0.734	-	2.94	509.05	108.16	2.69	237.71	33.62	0.241349	0.550017	0.698478	2.26316	1.17834	insig
MW0161352	[3-hexadecanoyloxy-2-[(9Z,12Z,15Z)-octadeca-9,12,15-trienoyl]oxypropyl] 2-(trimethylazaniumyl)ethyl phosphate	GP	PC	C42H78NO8P	3	0.7339	-	188.02	619.37	335.81	51.38	67.76	29.97	1.3429	0.119086	0.274061	7.66682	2.93863	up
MW0141741	2-[[3-hexadecanoyloxy-2-[(Z)-octadec-9-enoyl]oxypropoxy]-hydroxyphosphoryl]oxyethyl-trimethylazanium	GP	PC	C42H83NO8P+	3	0.7328	-	147.31	156.87	1181.12	14.32	170.18	12.71	1.05098	0.336735	0.523205	7.53157	2.91295	up
MW0164283	N-hydroxy-L-isoleucinate	Amino acids and derivatives	Amino acids and derivatives	C6H12NO3-	3	0.7327	-	8066.75	10572	18073.9	14087.8	9652.52	18038.8	0.366056	0.685345	0.798876	0.878729	-0.18651	insig
MW0142540	2-Oxo-6-methylthiohexanoic acid	Organic acids	Organic acids	C7H12O3S	3	0.7325	-	4051.64	391.73	2480.73	1389.49	3103.67	4386.44	0.459579	0.659992	0.783172	0.779776	-0.358868	insig
MEDN1198	1-O-glucosinoyl-β-D-glucose	Phenolic acids	Phenolic acids	C17H22O10	3	0.7318	-	1112.37	589.07	2238.16	359.81	231.72	344.81	1.23665	0.175055	0.351068	4.20745	2.07294	up
MW0140064	(-)-Threo-isodihomocitric acid	Organic acids	Organic acids	C8H12O7	3	0.7314	-	19087	6781.58	24470.4	13150.5	12474.6	12239.9	0.276343	0.51043	0.668416	1.32943	0.410812	insig
MW0165740	4-Methylthiobutyl-desulfoglucosinolate	Others	Glucosinolates	C12H23NO6S2	3	0.7303	-	1503.67	2030.5	38.29	2710.03	3336.96	118.44	0.314431	0.502907	0.662004	0.579434	-0.787284	insig
MW0166737	(3R,4S,9R,11R)-27-(4-hydroxyphenyl)-3-methoxy-4-methylheptacosane-9,11-diol	FA	Others	C35H64O4	3	0.7294	-	6033.32	8251.07	10822.3	6431.54	7674.93	8886.58	0.254743	0.68136	0.796347	1.09193	0.126875	insig
MW0145720	Asn-Gln-Gln	Amino acids and derivatives	Amino acids and derivatives	C14H24N6O7	3	0.7284	-	3376.42	2848.42	4918.74	1014.04	4383.3	5995.03	0.240736	0.962107	0.979353	0.978162	-0.0318551	insig
MW0153109	Lys-Phe-Val	Amino acids and derivatives	Amino acids and derivatives	C20H32N4O4	3	0.7283	-	7370.83	26279.4	33195.1	13169.3	22103.8	58503	0.358793	0.609593	0.747076	0.712819	-0.488393	insig
MEDN1384	D-Quinovose	Others	Saccharides	C6H12O5	3	0.7278	-	652.48	1268.86	1447.42	222.91	430.84	486.46	1.22895	0.0787023	0.208906	2.95451	1.56292	up
MW0014313	4-(3-Acetyl-2,6-dihydroxyphenyl)-2-methoxy-4-[3,4,5-trihydroxy-6-(hydroxymethyl)oxan-2-yl]oxybutanoic acid	Organic acids	Organic acids	C19H26O12	3	0.7267	-	272.23	2207.31	157.89	6003.37	7347.48	5638.81	1.24219	0.00358957	0.0289463	0.138888	-2.84801	down
MW0168059	(E,2Z)-2-[amino(carboxy)methylidene]-5-oxopent-3-enoate	Others	Others	C7H6NO5-	3	0.7255	-	60309.4	59547.4	56114.8	28049	32342	29783	1.44482	9.12632e-05	0.00443341	1.95147	0.96456	insig
ZINC70451003	Yuanhuafine	Terpenoids	Terpene	C29H32O10	3	0.7253	-	21245.4	4777.16	25135.6	10623.9	721.18	18848.8	0.566714	0.440801	0.613099	1.69432	0.760709	insig
ZINC95911730	3'-O-beta-Glucopyranosyl-stilbericoside	Alcohol and amines	Alcohols	C20H30O15	3	0.7247	-	448.62	553.92	495.72	622.18	419.55	622.52	0.442578	0.513568	0.671139	0.900261	-0.151584	insig
MW0111553	[4,5-Dihydroxy-6-(hydroxymethyl)-2-[2,4,6-trihydroxy-3-(4-hydroxybenzoyl)phenyl]oxan-3-yl] 3,4,5-trihydroxybenzoate	Benzene and substituted derivatives	Benzene and substituted derivatives	C26H24O14	3	0.7237	-	73578.6	65619.8	181918	83905.2	84320.2	77664	0.342324	0.572819	0.718032	1.30594	0.385086	insig
MW0004537	4-[2-(Pyrimidin-2-ylamino)-1,3-thiazol-4-yl]benzene-1,2-diol	Phenolic acids	Phenolic acids	C13H10N4O2S	3	0.7229	-	3.95937e+06	3.745e+06	3.92932e+06	4.28442e+06	4.25406e+06	4.56208e+06	1.3172	0.0187978	0.0817651	0.888029	-0.171321	insig
MW0121508	6-[(3-Aminophenyl)methyl]-4,6-dihydro-4-methyl-2-(methylsulfinyl)-5h-thieno[2',3':4,5]pyrrolo[2,3-d]pyridazin-5-one	Heterocyclic compounds	Heterocyclic compounds	C17H16N4O2S2	3	0.7216	-	42641.4	44451.7	39682.2	33809.7	36575.3	33515.1	1.33761	0.0139749	0.0669202	1.22017	0.287077	insig
MEDL00444	Pro-Ile	Amino acids and derivatives	Amino acids and derivatives	C11H20N2O3	3	0.7213	-	1.35601e+06	1.35945e+06	1.43153e+06	1.25171e+06	1.2292e+06	1.31286e+06	1.25501	0.0284179	0.105024	1.09311	0.128434	insig
MW0141229	10-Hydroxyloganin	Others	Lactones	C17H26O11	3	0.7195	-	58079.9	59608.5	68673.9	56179.1	62993.9	74858.7	0.26336	0.713271	0.819581	0.960473	-0.0581831	insig
MW0151247	3-[(1R,2S,3S,5Z,7S,8S,9Z,13S,14Z,17R,18R)-3,13,17-tris(2-carboxyethyl)-2,7,18-tris(carboxymethyl)-1,2,5,7,12,12,15,17-octamethyl-3,8,13,18,19,22-hexahydrocorrin-8-yl]propanoic acid	Organic acids	Organic acids	C45H60N4O14	3	0.7193	-	11065.2	12344.1	10638.2	1097.91	1260.61	2171.91	1.42876	0.000232983	0.00711656	7.51531	2.90983	up
MW0164056	(1S,2R,3S,4S,5R,6S)-4-azaniumyl-2-{[azaniumyl(imino)methyl]amino}-3,5,6-trihydroxycyclohexyl phosphate	Others	Others	C7H17N4O7P	3	0.7189	-	53177.5	53965.1	52310.6	86729.8	88993.1	149321	1.29352	0.11458	0.266275	0.490559	-1.0275	down
MW0165953	5-methyl-4-oxo-2-(2-oxopropyl)-8-[(2S,3R,4R,5S,6R)-3,4,5-trihydroxy-6-(hydroxymethyl)oxan-2-yl]chromen-7-olate	Heterocyclic compounds	Heterocyclic compounds	C19H21O9-	3	0.7163	-	823.34	421.72	799.55	20454.2	18595	17673.4	1.44638	0.00161027	0.0183927	0.0360458	-4.79403	down
MW0154972	Pelargonidin 3-sambubioside 5-glucoside	Flavonoids	Anthocyanidins	C32H39O19+	3	0.7161	-	344564	316191	344864	323617	343764	329972	0.165554	0.820194	0.894273	1.00829	0.0119071	insig
MW0140425	(2S)-2-hydroxy-3,4-diketopentyl phosphate	Organic acids	Organic acids	C5H9O7P	3	0.7145	-	33856.6	11197.1	20405	19150.5	25114	28507	0.393544	0.757383	0.853752	0.899511	-0.152788	insig
MW0164396	1-[(2-azaniumyl-4-methylpentanoyl)amino]ethenyl-hydroxyphosphinate	Others	Others	C8H17N2O4P	3	0.7142	-	766467	744212	824873	794645	725210	832950	0.0951655	0.892172	0.939717	0.992667	-0.0106187	insig
MW0003129	2-hydroxy-6-[(Z)-nonadec-8-enyl]benzoic acid	Benzene and substituted derivatives	Benzene and substituted derivatives	C26H42O3	3	0.7138	-	251.83	124.7	334.01	1183.26	1051.57	725.44	1.33467	0.0182869	0.0805621	0.240025	-2.05874	down
MW0143002	4-Hydroxy-3-iodophenylpyruvic acid	Benzene and substituted derivatives	Benzene and substituted derivatives	C9H7IO4	3	0.7109	-	2787.05	1777.44	2008.87	2793.27	4075.46	2346.27	0.897017	0.23293	0.417596	0.713333	-0.487353	insig
MEDP1678	Thr-Val-Leu	Amino acids and derivatives	Amino acids and derivatives	C15H29N3O5	3	0.7107	-	3277.98	1975.96	3185.81	226106	205473	217522	1.45473	0.000744235	0.0126614	0.0130022	-6.2651	down
MW0162710	[(2R,3S,4R,5R)-5-(5,6-dimethylbenzimidazol-1-yl)-3,4-dihydroxyoxolan-2-yl]methyl phosphate	Others	Others	C14H17N2O7P-2	3	0.7103	-	35817.3	37740.8	44958.1	62029.9	65919.7	57492.6	1.37642	0.00402239	0.0314918	0.6391	-0.645886	insig
MW0106024	(2S)-2-[[(2R,3R)-3-azaniumyl-2-hydroxy-4-phenylbutanoyl]amino]-4-methylpentanoate	Amino acids and derivatives	Amino acids and derivatives	C16H24N2O4	3	0.708	-	34778.3	36199	41605.4	30452.9	36036.3	35106.1	0.819119	0.249189	0.435324	1.10815	0.14815	insig
MW0144275	Acetyl-maltose	Others	Saccharides	C14H24O12	3	0.7038	-	22734.8	22025.2	22427.1	18090.3	20167.9	4943.98	0.815918	0.235298	0.420532	1.55518	0.637079	insig
MW0010565	(14R,27R)-22,33-dimethoxy-13,28-dimethyl-2,5,7,20-tetraoxa-13,28-diazaoctacyclo[25.6.2.216,19.13,10.121,25.04,8.031,35.014,39]nonatriaconta-1(33),3(39),4(8),9,16(38),17,19(37),21,23,25(36),31,34-dodecaene	Lignans and Coumarins	Lignans	C37H38N2O6	3	0.7037	-	858292	816497	773670	1.2235e+06	1.00245e+06	1.07354e+06	1.33313	0.0360261	0.12394	0.742072	-0.43037	insig
MW0127534	N-(3-hydroxypropyl)-2-[1-methyl-3-(phenylsulfanyl)-1H-indol-2-yl]acetamide	Alcohol and amines	Amines	C20H22N2O2S	3	0.7023	-	175.28	77.51	142.15	125.22	39.73	13.85	0.922094	0.18044	0.357686	2.20884	1.14329	insig
MW0163406	1-Ammonio-1-deoxy-scyllo-inositol	Others	Others	C6H14NO5+	3	0.7023	-	7.81907e+06	7936527	7.6613e+06	7.17225e+06	8.44809e+06	7.64897e+06	0.126385	0.908111	0.949507	1.00634	0.00912063	insig
MW0161781	alpha-Ketosuberate	Others	Lactones	C8H10O5-2	3	0.7011	-	540.46	503.63	113.22	1490.33	1949.08	636.01	1.08647	0.11479	0.266454	0.283973	-1.81617	down
MW0009706	N-[3-[(2-oxo-1-naphthalenylidene)methylamino]phenyl]-2-phenylpropanamide	Benzene and substituted derivatives	Benzene and substituted derivatives	C26H22N2O2	3	0.7006	-	32122.9	34436.3	30971.7	2889.9	2535.57	2227.1	1.456	0.000817411	0.0130127	12.7449	3.67184	up
MW0107958	L-thiocitrulline	Amino acids and derivatives	Amino acids and derivatives	C6H13N3O2S	3	0.6997	-	2632.78	1996.09	3144.56	1037.94	1464.55	192.53	1.05599	0.0282433	0.104666	2.88437	1.52826	up
MW0145479	Arg-Pro-Gly	Amino acids and derivatives	Amino acids and derivatives	C13H24N6O4	3	0.6995	-	29408.4	25006.4	23884.3	31870.9	36804.7	25821.1	0.877153	0.228943	0.413905	0.82859	-0.271269	insig
MW0155144	Phe-Cys-Gly	Amino acids and derivatives	Amino acids and derivatives	C14H19N3O4S1	3	0.6985	-	13844.9	4500.08	13949.2	23712.7	27072	23339.7	1.14037	0.0340747	0.119705	0.435675	-1.19868	down
MW0144701	Ala-Phe-Tyr	Amino acids and derivatives	Amino acids and derivatives	C21H25N3O5	3	0.6981	-	42496.9	45717.7	28456.2	48586	47536.8	54698.9	0.973431	0.15265	0.320498	0.773568	-0.3704	insig
MW0149850	Gln-Val-Ala	Amino acids and derivatives	Amino acids and derivatives	C13H24N4O5	3	0.6974	-	24694.7	29114.9	25938	28867.9	19919.5	29246	0.185092	0.875344	0.929031	1.02197	0.0313471	insig
MW0144505	Ala-Asn-Val	Amino acids and derivatives	Amino acids and derivatives	C12H22N4O5	3	0.6972	-	7364.97	553.22	16724.1	12123.6	1701.54	4498.71	0.0639409	0.729897	0.831576	1.34482	0.427414	insig
MW0142293	2D-5-O-methyl-2,3,5/4,6-pentahydroxycyclohexanone	Others	Ketone compounds	C7H12O6	3	0.6971	-	11440.4	16990.9	24263.6	8183.25	9603.97	16952	0.820335	0.269065	0.458496	1.51687	0.601096	insig
pmp001106	Vitexin-2''-O-glucoside	Flavonoids	Flavones	C27H30O16	3	0.6964	-	1831.28	1217.33	1509.13	928.56	2757.77	415.58	0.471786	0.852995	0.915675	1.11113	0.152023	insig
MW0144625	Ala-Ile-Tyr	Amino acids and derivatives	Amino acids and derivatives	C18H27N3O5	3	0.6961	-	20981.5	17549.7	21192	19804.5	20299.1	23290.2	0.521586	0.48886	0.652245	0.942098	-0.0860511	insig
MW0105669	Arg-Phe-Arg	Amino acids and derivatives	Amino acids and derivatives	C21H35N9O4	3	0.6958	-	2845.84	3302.53	6393.24	7625.75	11750.2	10449.6	1.24448	0.0254161	0.098598	0.420499	-1.24983	down
MW0158460	Tyr-Glu-Ile	Amino acids and derivatives	Amino acids and derivatives	C20H29N3O7	3	0.6957	-	23002.4	12147.9	17820.4	40338.1	40304	26015	1.21646	0.0427404	0.137511	0.496645	-1.00971	down
MW0150942	His-Gly-Met	Amino acids and derivatives	Amino acids and derivatives	C13H21N5O4S1	3	0.6954	-	868.59	1488.06	927.37	1361.8	1760.55	388.98	0.122428	0.878085	0.930867	0.935264	-0.0965547	insig
MW0152599	Leu-Enkephalin,amide	Amino acids and derivatives	Amino acids and derivatives	C28H38N6O6	3	0.6954	-	14438.7	9593.12	14370.9	2136.58	7547.8	4702.17	1.18358	0.0233039	0.0943388	2.66935	1.41649	up
MW0148597	Disinomenine	Alkaloids	Isoquinoline alkaloids	C38H44N2O8	3	0.695	-	3477.5	3451.76	5846.47	9151.23	7971.06	9353.51	1.316	0.0139627	0.0669202	0.482544	-1.05127	down
MW0156778	Ser-His-Met	Amino acids and derivatives	Amino acids and derivatives	C14H23N5O5S1	3	0.6945	-	14695.9	35446.8	7796.02	2645.24	11159.9	606.73	1.00648	0.216175	0.400975	4.02021	2.00727	up
MW0158468	Tyr-Gly-Ala	Amino acids and derivatives	Amino acids and derivatives	C14H19N3O5	3	0.6942	-	135.38	98.13	15.87	218.94	595.11	260.72	1.10176	0.137918	0.299453	0.232031	-2.10761	down
MW0155887	Pro-His-Trp	Amino acids and derivatives	Amino acids and derivatives	C22H26N6O4	3	0.694	-	278.32	1021.54	1369.78	14909.6	14077.7	14645.9	1.38648	8.76746e-06	0.00153697	0.0611838	-4.03071	down
MW0149698	Gln-Gly-Tyr	Amino acids and derivatives	Amino acids and derivatives	C16H22N4O6	3	0.6939	-	380.61	1819.45	2874.75	3607.21	2314.84	3220.03	0.830706	0.1948	0.375625	0.555105	-0.849169	insig
MW0146325	Asp-Val-Ser	Amino acids and derivatives	Amino acids and derivatives	C12H21N3O7	3	0.6937	-	322.49	219.67	229.79	471.77	207.49	682.31	0.779395	0.286701	0.475907	0.566956	-0.818692	insig
MW0109328	Pro-Met-Lys	Amino acids and derivatives	Amino acids and derivatives	C16H30N4O4S1	3	0.693	-	168694	139199	204436	235989	209270	245407	1.14874	0.0670483	0.185417	0.741791	-0.430916	insig
MW0106810	Gln-Cys	Amino acids and derivatives	Amino acids and derivatives	C8H15N3O4S1	3	0.6921	-	237358	191660	157219	290162	270726	119456	0.211554	0.633883	0.764756	0.861677	-0.21478	insig
MW0150525	Gly-Tyr-Val	Amino acids and derivatives	Amino acids and derivatives	C16H23N3O5	3	0.6915	-	28033.4	38757.9	16154.3	10633.9	15764.9	45793.8	0.38392	0.795707	0.878984	1.14895	0.200312	insig
MW0144011	8(9)-EET methyl ester	FA	Others	C21H34O3	3	0.6913	-	55672.4	36791.9	52667.6	38448.4	25039.6	35784.3	1.04453	0.107332	0.256072	1.46196	0.547902	insig
MW0155920	Pro-Lys-Ala	Amino acids and derivatives	Amino acids and derivatives	C14H26N4O4	3	0.691	-	23349	17871.9	17503.9	222919	414491	191680	1.43199	0.0662276	0.184286	0.0708304	-3.81949	down
MW0140185	(10aS)-10,10a-dihydrophenazine-1-carboxylic acid	Organic acids	Organic acids	C13H10N2O2	3	0.6909	-	250.35	358.31	310.81	69.49	109.07	155.61	1.31281	0.00919989	0.0523926	2.7515	1.46022	up
MW0141993	2,3-Bis-O-(geranylgeranyl)-sn-glycero-1-phospho-L-serine	GL	TG	C46H78NO8P	3	0.6905	-	84955.7	175589	76562.2	151843	315385	342017	1.12416	0.100109	0.243596	0.416569	-1.26337	down
MW0112031	Suprofen methyl ester	Organic acids	Organic acids	C15H14O3S	3	0.6904	-	688.87	3056.58	1941.57	7230.01	792.19	4120.78	0.502039	0.369756	0.556029	0.468338	-1.09438	insig
MW0161482	(2R,3S,4S,5R)-2-(hydroxymethyl)-6-[4-[(E)-3-hydroxyprop-1-enyl]-2,6-dimethoxyphenoxy]oxane-3,4,5-triol	Alcohol and amines	Alcohols	C17H24O9	3	0.6895	-	6807.3	4617.6	4206.39	1868.83	1402.75	1008.77	1.37511	0.0334129	0.117866	3.65187	1.86864	up
MW0109333	Pro-Pro-Arg	Amino acids and derivatives	Amino acids and derivatives	C16H28N6O4	3	0.6894	-	4848.77	505	1412.74	10781.2	2707.14	9181.74	0.988947	0.152857	0.320498	0.298478	-1.7443	insig
MW0150499	Gly-Thr-Trp	Amino acids and derivatives	Amino acids and derivatives	C17H22N4O5	3	0.6889	-	1062.3	32973.1	10319.9	38660.1	59221.3	68306.1	1.02578	0.0349692	0.121234	0.266899	-1.90563	down
MW0153006	Lys-Ile-Cys	Amino acids and derivatives	Amino acids and derivatives	C15H30N4O4S1	3	0.6889	-	325151	377494	389502	226012	216345	230169	1.41757	0.0161705	0.0745725	1.62395	0.699504	insig
MW0166724	4-(Isobutanoyl)sucrose	Others	Lactones	C16H28O12	3	0.6888	-	20589.6	24721.8	23059.3	25589.7	33069.2	29513.8	1.18095	0.0723296	0.19599	0.775419	-0.366952	insig
MW0148088	Cys-Val-Glu	Amino acids and derivatives	Amino acids and derivatives	C13H23N3O6S1	3	0.6887	-	7929.73	8037.86	6560.99	5627	6047.48	4089.8	1.16909	0.0440678	0.139907	1.42909	0.515097	insig
MW0153542	Met-Glu-Gly	Amino acids and derivatives	Amino acids and derivatives	C12H21N3O6S1	3	0.6881	-	522.49	386.63	670.12	562.81	114.08	1614.67	0.0826378	0.648961	0.777596	0.689155	-0.5371	insig
MW0156052	Pro-Val-Met	Amino acids and derivatives	Amino acids and derivatives	C15H27N3O4S1	3	0.6881	-	21897	26615.5	20528.1	11921.6	17472.5	27672.7	0.627079	0.488048	0.651593	1.20982	0.274797	insig
ZINC6041333	(2S,3S,8aS,11S,12S,15aS)-2,12-Dihydroxy-7,15a-diisopropyl-20,20,21,21-tetramethyl-2,3:11,12-bisbutano-2,3,4,5,9,10,11,12,13,14,15,15a-dodecahydro-1H,8aH-8,16-dioxadicyclohepta[a,h]anthracene-14,15-dione	Others	Ketone compounds	C40H56O6	3	0.6875	-	167.35	165.01	1400.12	19893.5	19118.7	25129.6	1.37895	0.00616117	0.0411971	0.0270102	-5.21035	down
MW0130741	2-Ethoxycarbonyl-2-hydroxy-5,7-dimethoxyisoflavanone	Others	Ketone compounds	C20H20O7	3	0.6875	-	607.85	2004.01	892.79	280.9	76.89	361.99	1.18247	0.156591	0.325284	4.86906	2.28364	up
MW0157636	Thr-Glu-Met	Amino acids and derivatives	Amino acids and derivatives	C14H25N3O7S1	3	0.6863	-	14487.8	13407.2	21275.5	33517.8	32498.1	34036.1	1.35832	0.0177795	0.0792122	0.49145	-1.02488	down
MW0150466	Gly-Pro-His	Amino acids and derivatives	Amino acids and derivatives	C13H19N5O4	3	0.6857	-	131678	78002.5	126380	156052	148031	167072	1.06015	0.107457	0.256168	0.71327	-0.487481	insig
MW0158409	Tyr-Asp-Asp	Amino acids and derivatives	Amino acids and derivatives	C17H21N3O9	3	0.6848	-	697.28	4043.45	2717.63	1304.41	4454.39	3971.84	0.391144	0.612439	0.748743	0.766482	-0.383676	insig
MW0151658	Ile-Val-Trp	Amino acids and derivatives	Amino acids and derivatives	C22H32N4O4	3	0.6847	-	11211.4	7364.87	14951.1	20347.2	28809.9	23071.4	1.26506	0.0183057	0.0805621	0.464185	-1.10723	down
MW0162006	Phosphatidylinositol 4-phosphate	GL	DG	C11H20O16P2	3	0.6835	-	8642.23	39187.8	36728.5	2265.37	650.39	11528.4	1.0953	0.128302	0.286284	5.85418	2.54947	up
MW0155945	Pro-Met-Leu	Amino acids and derivatives	Amino acids and derivatives	C16H29N3O4S1	3	0.6831	-	1631.87	2842.31	276.65	1081.08	1163.74	1203.27	0.0568321	0.617338	0.752679	1.37781	0.462382	insig
MW0145270	Arg-Asn-Gln	Amino acids and derivatives	Amino acids and derivatives	C15H28N8O6	3	0.6828	-	92.05	511.54	777.81	2226.16	1845.44	7.75	0.0171718	0.318636	0.507641	0.338632	-1.56221	insig
MW0110195	Tyr-Gln-Lys	Amino acids and derivatives	Amino acids and derivatives	C20H31N5O6	3	0.6825	-	1782.77	1449.81	1541.12	60456.4	51849.1	61003	1.45746	0.00274755	0.0250431	0.0275445	-5.18209	down
MW0161952	5-Ureidoimidazole-4-carboxylate	Organic acids	Organic acids	C5H5N4O3-	3	0.6822	-	9019.9	17127.9	16615.8	343.16	385.2	1561.71	1.38247	0.0332312	0.117328	18.6735	4.22292	up
MW0168269	Podocarpa-8,11,13-trien-16-oic acid, 12-hydroxy-	Terpenoids	Ditepenoids	C17H22O3	3	0.682	-	33155.1	33112.1	36433.2	33624.2	25583.8	29563.5	0.968633	0.173033	0.348486	1.15691	0.210273	insig
MW0149792	Gln-Pro-Leu	Amino acids and derivatives	Amino acids and derivatives	C16H28N4O5	3	0.6806	-	2013.28	2284.08	8829.17	4344.82	9546.02	2375.51	0.337967	0.751786	0.849552	0.806975	-0.309405	insig
ZINC101269056	Rhamnazin 3-O-sulfate	Flavonoids	Flavonols	C17H14O10S	3	0.6802	-	4460.41	3160.57	4552.1	11423.4	11479.3	7862.69	1.36725	0.0240424	0.0960742	0.395675	-1.33761	down
MW0151116	His-Trp-Phe	Amino acids and derivatives	Amino acids and derivatives	C26H28N6O4	3	0.6797	-	1897.66	484.52	3068.16	2711.62	4821.21	1790.69	0.719083	0.332623	0.518815	0.58458	-0.774529	insig
MW0162231	3,8'-Biflaviolin 2,2'-diolate	Benzene and substituted derivatives	Benzene and substituted derivatives	C20H8O10-2	3	0.6788	-	26392.2	26695.8	30294.8	61942.2	72825.4	59361	1.43568	0.00782862	0.0480441	0.429523	-1.21919	down
MW0148282	deoxylimonoic acid D-ring-lactone	Others	Ketone compounds	C26H34O9	3	0.6787	-	3634.95	4257.32	1295.67	4696.08	2884.55	5456.45	0.670746	0.339935	0.526957	0.704754	-0.504807	insig
MW0110193	Tyr-Cys-Lys	Amino acids and derivatives	Amino acids and derivatives	C18H28N4O5S1	3	0.6784	-	718.93	549.75	297.59	336.39	577.51	1361.26	0.392373	0.535693	0.689188	0.688422	-0.538635	insig
MW0153867	Met-Met	Amino acids and derivatives	Amino acids and derivatives	C10H20N2O3S2	3	0.6779	-	343919	317033	308691	330135	318264	381428	0.602645	0.428979	0.602244	0.941559	-0.0868771	insig
ZINC95911351	(20S)-3beta-(Tigloylamino)-20-(methylamino)-16alpha,17alpha-epoxy-5alpha-pregna-2-ene-4-one	Alcohol and amines	Amines	C27H40N2O3	3	0.6778	-	2.65852e+06	2.62825e+06	2.52254e+06	3.23273e+06	3.22001e+06	3.02629e+06	1.40654	0.00405242	0.0316042	0.823851	-0.279544	insig
MW0148610	Ditrans,polycis-heptaprenyl diphosphate	Organic acids	Organic acids	C35H60O7P2	3	0.6773	-	6152.99	6810.56	6118.02	2948.07	6341.79	7846.64	0.432885	0.699782	0.809387	1.1135	0.155107	insig
MW0162939	[3-[(9Z,12Z)-octadeca-9,12-dienoyl]oxy-2-[(9Z,12Z,15Z)-octadeca-9,12,15-trienoyl]oxypropyl] 2-(trimethylazaniumyl)ethyl phosphate	GP	PC	C44H78NO8P	3	0.6761	-	4556.62	8646.07	6417.81	13672.1	4338.17	1970.86	0.309846	0.976945	0.987547	0.981951	-0.0262764	insig
MW0109631	Ser-Phe-Lys	Amino acids and derivatives	Amino acids and derivatives	C18H28N4O5	3	0.676	-	4127.71	6660.16	19989.5	34738.5	21305.5	29613.8	1.14185	0.0463818	0.143912	0.359306	-1.47671	down
MW0157711	Thr-Leu-Thr	Amino acids and derivatives	Amino acids and derivatives	C14H27N3O6	3	0.6757	-	7570.07	7108.9	6406.58	9903.52	11019.4	8433.38	1.27278	0.0490309	0.150661	0.718263	-0.477416	insig
MW0143628	5-Hydroxy-2,4-dioxopentanoic acid	Organic acids	Organic acids	C5H6O5	3	0.6756	-	113142	120087	107567	220696	210712	201341	1.44603	0.000329314	0.00845123	0.538597	-0.892721	insig
MW0107091	Gly-Ser-Lys	Amino acids and derivatives	Amino acids and derivatives	C11H22N4O5	3	0.6736	-	179486	176011	175090	220272	228613	222315	1.44947	0.00044059	0.00976075	0.790505	-0.339154	insig
MW0145756	Asn-Gly-Phe	Amino acids and derivatives	Amino acids and derivatives	C15H20N4O5	3	0.6713	-	2600.66	3804.5	2824.17	1352.81	1229.76	2148.1	1.24833	0.0357192	0.123094	1.95096	0.964181	insig
MW0157847	Thr-Tyr-Phe	Amino acids and derivatives	Amino acids and derivatives	C22H27N3O6	3	0.6711	-	2.15465e+06	2.11582e+06	2.16e+06	3.30265e+06	3.20782e+06	3.14372e+06	1.45459	0.000844643	0.0130483	0.666081	-0.586231	insig
MW0145719	Asn-Gln-Cys	Amino acids and derivatives	Amino acids and derivatives	C12H21N5O6S1	3	0.6692	-	1605.02	1476.81	1215.09	2676.71	1384.72	1618.63	0.720266	0.366702	0.553407	0.756492	-0.402603	insig
MW0148768	dTDP-alpha-D-forosamine	Nucleotides and derivatives	Nucleotides and derivatives	C18H31N3O12P2	3	0.6692	-	3583.4	11984.8	5481.07	16735.2	2665.25	4662.47	0.0468257	0.855078	0.916487	0.874759	-0.193043	insig
MW0159093	Val-Lys-Ile	Amino acids and derivatives	Amino acids and derivatives	C17H34N4O4	3	0.6686	-	259.02	223.79	263.36	509.66	346.39	161.13	0.423095	0.464758	0.633718	0.733567	-0.446999	insig
MW0148736	dTDP-4-amino-2,3,4,6-tetradeoxy-D-glucose	Nucleotides and derivatives	Nucleotides and derivatives	C16H27N3O12P2	3	0.6676	-	44959.1	16694.7	12518.5	555899	525230	622270	1.41947	0.00106188	0.0146627	0.0435437	-4.52139	down
MW0156948	Ser-Tyr-Asn	Amino acids and derivatives	Amino acids and derivatives	C16H22N4O7	3	0.6672	-	75805.4	82405.4	77036.9	118800	114279	115102	1.44407	0.000230437	0.00709253	0.675647	-0.565658	insig
MW0152285	Leu-Gln-Asp	Amino acids and derivatives	Amino acids and derivatives	C15H26N4O7	3	0.6662	-	10803.7	8225.51	12963.8	5689.92	8872.59	7864.34	1.00347	0.136439	0.297363	1.42655	0.512527	insig
MW0150358	Gly-Glu-Ser	Amino acids and derivatives	Amino acids and derivatives	C10H17N3O7	3	0.6656	-	318.39	871.69	3829.66	3655.22	477.62	1148.15	0.164325	0.955249	0.975326	0.95053	-0.0731958	insig
MW0148082	Cys-Tyr-Asp	Amino acids and derivatives	Amino acids and derivatives	C16H21N3O7S1	3	0.6653	-	14496	5008.42	16216.8	7992.37	12883	5386.24	0.390415	0.494059	0.655494	1.36021	0.443825	insig
MW0139822	Theaflavin monogallates	Tannins	Proanthocyanidins	C36H28O16	3	0.665	-	9632.96	7181.02	6089.23	8453.49	8891.4	9105.16	0.746046	0.376382	0.562689	0.865904	-0.207721	insig
MW0147466	Chrysanthetriol	Terpenoids	Sesquiterpenoids	C15H26O3	3	0.6643	-	405.44	208.85	344.14	2811.48	1407.15	2827.25	1.39413	0.0479172	0.147934	0.136027	-2.87803	down
MW0109103	Phe-Gln-Arg	Amino acids and derivatives	Amino acids and derivatives	C20H31N7O5	3	0.6638	-	27758.1	31223.2	25217.2	21348.7	15714.4	10161.9	1.18208	0.0422387	0.136792	1.78292	0.834243	insig
MW0145310	Arg-Cys-Gln	Amino acids and derivatives	Amino acids and derivatives	C14H27N7O5S1	3	0.6637	-	13640.3	8499.1	19715.2	16696.8	15282.7	14598.8	0.457454	0.677475	0.794064	0.898585	-0.154273	insig
MW0153484	Met-Ala-Glu	Amino acids and derivatives	Amino acids and derivatives	C13H23N3O6S1	3	0.6628	-	7338.8	16811.2	21634.8	18360.8	16419.8	12568.7	0.243372	0.916555	0.954675	0.96696	-0.0484716	insig
MW0116346	3-[(E)-(2-nitrophenyl)methylideneamino]imidazolidine-2,4-dione	Benzene and substituted derivatives	Benzene and substituted derivatives	C10H8N4O4	3	0.6617	-	974.77	1107.16	701.99	623.94	232.28	1152.68	0.671939	0.446544	0.618079	1.38579	0.470712	insig
MW0153677	Met-Thr-His	Amino acids and derivatives	Amino acids and derivatives	C15H25N5O5S1	3	0.6615	-	13493.1	11960.2	9605.65	9904.45	9601.78	4685.38	0.902431	0.159996	0.330733	1.44922	0.535278	insig
ZINC95912566	[(8S,9S,10S,11R)-11-acetyloxy-9-hydroxy-3,4,5,19-tetramethoxy-9,10-dimethyl-15,17-dioxatetracyclo[10.7.0.02,7.014,18]nonadeca-1(19),2,4,6,12,14(18)-hexaen-8-yl] (Z)-2-methylbut-2-enoate	Others	Lactones	C30H36O11	3	0.6612	-	11634.5	9389.22	10967.9	9348.08	11155.7	7897.47	0.680287	0.364248	0.551428	1.12642	0.171742	insig
MW0144784	Ala-Tyr-Trp	Amino acids and derivatives	Amino acids and derivatives	C23H26N4O5	3	0.6591	-	13487.4	5903.04	6109.26	14638.4	8112.27	8665.78	0.518649	0.578088	0.721805	0.811667	-0.30104	insig
MW0150088	Glu-Met-Gln	Amino acids and derivatives	Amino acids and derivatives	C15H26N4O7S1	3	0.6589	-	25267.2	23499	16334.1	50787.7	41726.5	57816	1.35901	0.0110748	0.0587546	0.433049	-1.2074	down
MW0107077	Gly-Leu-Met	Amino acids and derivatives	Amino acids and derivatives	C13H25N3O4S1	3	0.6584	-	16029	12500.9	19668.8	12305.2	14909.6	11125.1	0.83627	0.254645	0.441604	1.25714	0.330144	insig
MW0151412	Ile-Glu-Cys	Amino acids and derivatives	Amino acids and derivatives	C14H25N3O6S1	3	0.6577	-	8356.38	10965.2	9822.4	2106.57	30050.6	980.54	0.574242	0.901641	0.945931	0.879481	-0.185276	insig
MW0142541	2-Oxo-7-methylthioheptanoic acid	Organic acids	Organic acids	C8H14O3S	3	0.6576	-	169.13	164.8	319.89	3136.24	2463.8	3203.89	1.43687	0.00564763	0.0391932	0.0742646	-3.75118	down
MW0150357	Gly-Glu-Met	Amino acids and derivatives	Amino acids and derivatives	C12H21N3O6S1	3	0.6575	-	35989.1	36174	47121	18219.7	19599.2	10058.9	1.31279	0.00821035	0.049344	2.49143	1.31697	up
MW0148074	Cys-Trp-Ala	Amino acids and derivatives	Amino acids and derivatives	C17H22N4O4S1	3	0.6572	-	46295.2	20132.9	35967.4	16732.2	17312.8	12041.7	1.18272	0.126524	0.284296	2.2218	1.15173	up
MEDL00427	Phe-Leu-Leu	Amino acids and derivatives	Amino acids and derivatives	C21H33N3O4	3	0.6569	-	22995.6	21308.7	26693.3	13823	21276.3	23526.5	0.753008	0.30219	0.491303	1.21103	0.276234	insig
MW0106259	Cys-His-Lys	Amino acids and derivatives	Amino acids and derivatives	C15H26N6O4S1	3	0.6564	-	12376.6	13545	14914.5	16235.7	13059.2	15544.7	0.691024	0.336623	0.523205	0.910715	-0.134929	insig
MW0156727	Ser-Glu-Gln	Amino acids and derivatives	Amino acids and derivatives	C13H22N4O8	3	0.6561	-	377891	409118	431242	349847	456387	392999	0.169804	0.866505	0.924272	1.01586	0.0226991	insig
MW0150399	Gly-Leu-Asn	Amino acids and derivatives	Amino acids and derivatives	C12H22N4O5	3	0.6536	-	15881.4	13270.3	8767.73	14676.8	15336.3	12297.5	0.490971	0.569146	0.714668	0.896216	-0.158082	insig
MW0153627	Met-Phe-Asp	Amino acids and derivatives	Amino acids and derivatives	C18H25N3O6S1	3	0.6535	-	811.25	551.61	22.79	1006.52	1791.67	2458.44	0.958366	0.0712988	0.193921	0.2636	-1.92358	insig
MW0150087	Glu-Met-Asp	Amino acids and derivatives	Amino acids and derivatives	C14H23N3O8S1	3	0.6535	-	43055.8	62148.5	54417.5	64315.6	81748.8	63101.3	1.03713	0.114347	0.266194	0.763136	-0.389987	insig
MW0156681	Ser-Asp-Ile	Amino acids and derivatives	Amino acids and derivatives	C13H23N3O7	3	0.6525	-	781246	822217	861326	879359	855408	825463	0.724573	0.325781	0.512753	0.962722	-0.0548092	insig
MW0149642	Gln-Asp-Asn	Amino acids and derivatives	Amino acids and derivatives	C13H21N5O8	3	0.6522	-	7359.09	8853.44	4868.32	6187.98	5288.89	4071.82	0.814602	0.254206	0.441221	1.3558	0.43914	insig
MW0141031	[(2R,3S,4R,5R)-5-[5-amino-4-[(4-amino-4-oxo-butanoyl)amino]imidazol-1-yl]-3,4-dihydroxy-tetrahydrofuran-2-yl]methyl dihydrogen phosphate	Alcohol and amines	Amines	C12H20N5O9P	3	0.6515	-	1316.39	407.74	3366.99	979.29	3319.48	955.7	0.178092	0.965286	0.981103	0.968912	-0.0455622	insig
MW0159006	Val-Gly-Ala	Amino acids and derivatives	Amino acids and derivatives	C10H19N3O4	3	0.6513	-	115799	113872	108710	104302	97763.1	97018.9	1.31491	0.0141771	0.0673286	1.13139	0.178101	insig
MW0141813	2-[hydroxy-[2-hydroxy-3-[(Z)-octadec-9-enoyl]oxypropoxy]phosphoryl]oxyethyl-trimethylazanium	GP	PC	C26H53NO7P+	3	0.6506	-	5222.71	5370.47	2569.42	11796.5	3018.61	6239.46	0.548755	0.417649	0.593989	0.625167	-0.677685	insig
MW0156958	Ser-Tyr-Ile	Amino acids and derivatives	Amino acids and derivatives	C18H27N3O6	3	0.6503	-	25918.8	22739.3	29623.3	25104.5	31932.8	31448	0.715027	0.315973	0.505556	0.884683	-0.176768	insig
MW0161020	(2S)-4-(2-aminophenyl)-2-azaniumyl-4-oxobutanoate	Others	Lactones	C10H12N2O3	3	0.6496	-	11222.5	7038.63	9437.79	20262	5601.11	19397.3	0.550097	0.342642	0.529526	0.611989	-0.708422	insig
MW0157811	Thr-Thr-Gln	Amino acids and derivatives	Amino acids and derivatives	C13H24N4O7	3	0.6494	-	10889.2	12343.2	13949.4	6706.17	6562.1	297.82	0.909723	0.049062	0.150661	2.74079	1.45459	insig
MW0154968	Pelargonidin 3-O-beta-D-glucoside 5-O-(6-coumaroyl-beta-D-glucoside)	Flavonoids	Anthocyanidins	C36H37O17+	3	0.6486	-	1.9012e+06	2.02711e+06	2.03495e+06	2.05422e+06	2.03882e+06	1.84287e+06	0.0936084	0.916351	0.954675	1.00461	0.00663355	insig
MW0158639	Tyr-Trp-Leu	Amino acids and derivatives	Amino acids and derivatives	C26H32N4O5	3	0.6483	-	18331.9	990.2	19093.7	13668.4	13022.2	11749.3	0.426385	0.999042	0.99958	0.999373	-0.000904785	insig
MW0013335	(3beta)-26,27-Dinorcholest-5-en-24-yne-3,20-diol	Alcohol and amines	Alcohols	C25H38O2	3	0.6483	-	5195.83	1930.76	9774.77	5761.6	18961.2	7935.46	0.764205	0.340065	0.526957	0.517522	-0.950308	insig
MW0168305	Methyl octadeca-5,9,12-trienoate	FA	Others	C19H32O2	3	0.6478	-	325560	390894	452693	448113	258016	483163	0.0343665	0.937569	0.964645	0.983062	-0.0246462	insig
MW0150992	His-Leu-Ile	Amino acids and derivatives	Amino acids and derivatives	C18H31N5O4	3	0.6475	-	7415.24	6548.57	7668.11	6463.5	10956	6830.12	0.354613	0.609851	0.747165	0.892053	-0.164799	insig
MW0151071	His-Pro-Val	Amino acids and derivatives	Amino acids and derivatives	C16H25N5O4	3	0.6471	-	647.88	4331.68	2386.75	1581.28	686.27	1562.68	0.501734	0.384619	0.570626	1.9232	0.943511	insig
MW0151150	His-Val-Leu	Amino acids and derivatives	Amino acids and derivatives	C17H29N5O4	3	0.6468	-	852632	857091	950909	742459	899511	936461	0.31263	0.711651	0.818231	1.03188	0.0452753	insig
MW0148043	Cys-Met-Ala	Amino acids and derivatives	Amino acids and derivatives	C11H21N3O4S2	3	0.6464	-	108617	81954.1	198271	130318	96734.8	121227	0.126464	0.74271	0.842128	1.11646	0.158936	insig
MW0149934	Glu-Asn-Phe	Amino acids and derivatives	Amino acids and derivatives	C18H24N4O7	3	0.6462	-	42509.2	37036.7	38214.2	62012.1	56149.8	49791.3	1.34	0.0258854	0.0995894	0.701149	-0.512207	insig
MW0164941	2-oxo-3-sulfinopropanoate	Others	Others	C3H3O5S-	3	0.6452	-	10324.2	9696.87	8595.11	11092.6	11856.1	13304.6	1.22929	0.0393217	0.130771	0.789342	-0.341277	insig
MW0147890	Cyanidin 3-glucoside 5-caffeoylglucoside	Flavonoids	Anthocyanidins	C36H37O19+	3	0.645	-	950906	872027	818917	1.62821e+06	1.75378e+06	1.66828e+06	1.44293	0.000114181	0.0051728	0.52311	-0.934814	insig
MW0144728	Ala-Ser-Glu	Amino acids and derivatives	Amino acids and derivatives	C11H19N3O7	3	0.645	-	38766.2	37231.1	33964.9	40029.8	47003.5	41968.3	1.15279	0.0734012	0.198228	0.852409	-0.230382	insig
MW0108017	Lys-Pro-Lys	Amino acids and derivatives	Amino acids and derivatives	C17H33N5O4	3	0.6436	-	138387	170033	129586	158134	159166	43850.8	0.52783	0.579193	0.722558	1.21281	0.278349	insig
MW0155942	Pro-Met-Gly	Amino acids and derivatives	Amino acids and derivatives	C12H21N3O4S1	3	0.6434	-	8574.73	7704.26	8013.67	2192.35	5034.97	5938.28	1.08953	0.0748938	0.201315	1.84516	0.883747	insig
MW0148079	Cys-Trp-Val	Amino acids and derivatives	Amino acids and derivatives	C19H26N4O4S1	3	0.6429	-	4376.48	8926.57	10582.6	21763.1	20595.4	21166.7	1.29509	0.0166375	0.0757138	0.376002	-1.41119	down
MW0156876	Ser-Phe-Leu	Amino acids and derivatives	Amino acids and derivatives	C18H27N3O5	3	0.6418	-	18193.8	105182	105665	117592	37411.8	90412.6	0.238386	0.891349	0.939566	0.933275	-0.0996261	insig
MW0007067	ethyl 6,7-dimethoxy-4-oxo-2,3-dihydro-1H-naphthalene-2-carboxylate	Others	Lactones	C15H18O5	3	0.6412	-	38379.8	25484.3	24205.7	24479.1	21103.6	16909.5	0.986311	0.192093	0.372186	1.40929	0.49497	insig
MW0157600	Thr-Cys-His	Amino acids and derivatives	Amino acids and derivatives	C13H21N5O5S1	3	0.6407	-	9826.18	8777.56	6671.55	5186.36	6143.59	1577.05	0.986099	0.0785069	0.208662	1.95826	0.969574	insig
MW0148717	dTDP-3-amino-3,4,6-trideoxy-alpha-D-glucose	Nucleotides and derivatives	Nucleotides and derivatives	C16H27N3O13P2	3	0.64	-	10498.7	11771.4	10890.1	10057.6	19534.1	5672.44	0.127036	0.879917	0.931677	0.940339	-0.0887475	insig
MW0159902	2-Sulfanylethanesulfonate	Organic acids	Organic acids	C2H5O3S2-	3	0.6399	-	8927.65	15066.2	21516.4	9449.43	65168.6	17128.2	0.475771	0.471702	0.638651	0.496045	-1.01146	insig
MW0151014	His-Lys-Leu	Amino acids and derivatives	Amino acids and derivatives	C18H32N6O4	3	0.6398	-	67477.1	63995.3	66967.3	89874.9	80430.5	93643.5	1.38074	0.0241893	0.0963748	0.751811	-0.411557	insig
MW0149969	Glu-Gln-Asn	Amino acids and derivatives	Amino acids and derivatives	C14H23N5O8	3	0.6392	-	878	720.62	1086.91	1319.51	555.41	599.36	0.351681	0.812425	0.889652	1.08538	0.118198	insig
MW0150028	Glu-His-Phe	Amino acids and derivatives	Amino acids and derivatives	C20H25N5O6	3	0.6386	-	785.99	557.2	764.04	557.19	765.3	1314.26	0.437256	0.52268	0.677638	0.799177	-0.323413	insig
MW0158626	Tyr-Thr-Phe	Amino acids and derivatives	Amino acids and derivatives	C22H27N3O6	3	0.6383	-	121320	155008	80028.1	116155	140328	119968	0.308549	0.793049	0.876769	0.946618	-0.0791457	insig
MW0149972	Glu-Gln-Gly	Amino acids and derivatives	Amino acids and derivatives	C12H20N4O7	3	0.6382	-	45917.1	104598	47699.1	55278.7	87787.7	185971	0.667829	0.394451	0.57849	0.602406	-0.731191	insig
MW0148056	Cys-Phe-Ile	Amino acids and derivatives	Amino acids and derivatives	C18H27N3O4S1	3	0.6378	-	49889.1	36250.8	41856.5	70450	32712.2	57400.3	0.513445	0.435781	0.60879	0.797175	-0.327031	insig
MW0151655	Ile-Val-Phe	Amino acids and derivatives	Amino acids and derivatives	C20H31N3O4	3	0.6366	-	23221.5	24032.2	31212.3	11563.3	9548.75	7735.82	1.39875	0.0121929	0.0620183	2.71999	1.4436	up
MW0151573	Ile-Ser-Gln	Amino acids and derivatives	Amino acids and derivatives	C14H26N4O6	3	0.6353	-	11554.9	11895.1	13545.4	7610.01	8383.07	6761.52	1.38763	0.00443898	0.0335796	1.62584	0.701187	insig
MW0010853	[(1R,6R,10S,11R,13S,15R)-1,6-dihydroxy-8-(hydroxymethyl)-4,12,12,15-tetramethyl-5-oxo-13-tetracyclo[8.5.0.02,6.011,13]pentadeca-3,8-dienyl] hexadecanoate	Benzene and substituted derivatives	Benzene and substituted derivatives	C36H58O6	3	0.6352	-	550436	514522	539796	568521	555979	525719	0.601438	0.413798	0.592006	0.972449	-0.0403061	insig
MW0107729	Leu-Ile-Ile	Amino acids and derivatives	Amino acids and derivatives	C18H35N3O4	3	0.6351	-	117360	110950	118678	143178	141912	147526	1.42592	0.00101083	0.0143006	0.802071	-0.318197	insig
MW0123051	2-Methoxy-N-(3-Methyl-2-Oxo-1,2,3,4-Tetrahydroquinazolin-6-Yl)benzenesulfonamide	Alcohol and amines	Amines	C16H17N3O4S	3	0.6347	-	38263.9	25625	37606.5	10681.6	18750.9	26780.2	1.0698	0.072661	0.196756	1.80556	0.852447	insig
MW0150120	Glu-Pro-Gln	Amino acids and derivatives	Amino acids and derivatives	C15H24N4O7	3	0.6341	-	3277.58	3503.21	8091.54	476.11	15974.7	6709.17	0.131954	0.6107	0.747523	0.642155	-0.639006	insig
MW0150868	His-Asp-Asn	Amino acids and derivatives	Amino acids and derivatives	C14H20N6O7	3	0.634	-	7044.87	922.06	5339.01	5601.85	1635.38	864.53	0.410127	0.501658	0.661224	1.64235	0.715763	insig
MW0157171	Spinosyn P	Others	Lactones	C39H61NO10	3	0.6338	-	45506.5	35651.3	22801	4014.56	27234.4	20700	0.86603	0.143501	0.307273	2.00117	1.00085	insig
MW0000303	(1R,9R,13S,14S,16S)-13-ethyl-8-methyl-8,15-diazahexacyclo[14.2.1.01,9.02,7.010,15.012,17]nonadeca-2,4,6-triene-14,18-diol	Alkaloids	Alkaloids	C20H26N2O2	3	0.6335	-	85671	86050.3	89954.2	122821	104568	109940	1.35583	0.0364171	0.124541	0.775728	-0.366376	insig
MW0156878	Ser-Phe-Phe	Amino acids and derivatives	Amino acids and derivatives	C21H25N3O5	3	0.6332	-	19361.1	42565.3	37140.2	55768.6	55935.7	53748.2	1.10688	0.0859039	0.221461	0.598762	-0.739944	insig
MEDN1422	8-Hydroxyeicosa-9,11,14-trienoic acid	Lipids	Free fatty acids	C20H34O3	3	0.6329	-	211534	246278	267401	115699	257368	214827	0.668103	0.394702	0.578495	1.23358	0.302848	insig
MW0155295	Phe-Met-Tyr	Amino acids and derivatives	Amino acids and derivatives	C23H29N3O5S1	3	0.6327	-	15720.8	12217.1	15336	17265.2	15050.2	14558.3	0.582715	0.439306	0.61163	0.923203	-0.115281	insig
MW0158459	Tyr-Glu-His	Amino acids and derivatives	Amino acids and derivatives	C20H25N5O7	3	0.6322	-	25175.3	29144.5	27237.5	25244	24802.8	18246	0.9255	0.180802	0.358228	1.19423	0.256079	insig
MW0151120	His-Tyr-Ala	Amino acids and derivatives	Amino acids and derivatives	C18H23N5O5	3	0.6317	-	138824	134576	110203	79785.8	78652.5	57389.1	1.33247	0.00915222	0.0522688	1.77736	0.829734	insig
MW0110361	Val-Phe-Arg	Amino acids and derivatives	Amino acids and derivatives	C20H32N6O4	3	0.6317	-	27529.4	25765.2	17571.8	43838.1	41811.2	37891.9	1.29891	0.013656	0.0664414	0.573625	-0.80182	insig
MW0158405	Tyr-Asp-Ala	Amino acids and derivatives	Amino acids and derivatives	C16H21N3O7	3	0.6308	-	61083.4	47204.2	74170.6	8666.02	59645.2	66400.1	0.600718	0.48639	0.650456	1.35444	0.437695	insig
MW0149216	Flavonol 3-O-D-xylosylglucoside	Flavonoids	Flavonols	C26H28O12	3	0.6298	-	2.27011e+06	2.25539e+06	2.52573e+06	2.53778e+06	2.42361e+06	2.50523e+06	0.872116	0.251335	0.438124	0.944368	-0.0825793	insig
MW0156739	Ser-Glu-Met	Amino acids and derivatives	Amino acids and derivatives	C13H23N3O7S1	3	0.6298	-	2367.96	3431.42	2346.39	923.3	302.21	3822.13	0.791248	0.446446	0.618079	1.61378	0.690442	insig
MW0106898	Glu-Gln-Lys	Amino acids and derivatives	Amino acids and derivatives	C16H29N5O7	3	0.6293	-	3251.37	1027.35	3685.24	1067.2	2654.18	3463.32	0.101517	0.822516	0.895352	1.10846	0.148558	insig
MW0155390	Phe-Tyr-Phe	Amino acids and derivatives	Amino acids and derivatives	C27H29N3O5	3	0.6274	-	1230.91	1564.11	305.33	500.62	587.77	726.2	0.44989	0.372993	0.559125	1.70857	0.772787	insig
MW0162904	(1S,2R,3S,4S,5R,6S)-2,4-bis{[amino(iminio)methyl]amino}-3,5,6-trihydroxycyclohexyl phosphate	Organic acids	Organic acids	C8H19N6O7P	3	0.6258	-	7893.64	9215.8	7631.61	4956.41	5669.62	5035.87	1.39126	0.0133094	0.0652384	1.5797	0.659647	insig
MW0151107	His-Trp-Ala	Amino acids and derivatives	Amino acids and derivatives	C20H24N6O4	3	0.6257	-	8857.37	10959	7445.62	9203.22	8213.44	7544.92	0.437324	0.547985	0.6971	1.09216	0.127179	insig
MW0154964	Pelargonidin 3-O-(6-caffeoyl-beta-D-glucoside)	Flavonoids	Anthocyanidins	C30H27O13+	3	0.6256	-	43443.1	25851.2	29150.5	46687.1	44395.6	47134.9	1.10227	0.13019	0.289432	0.712245	-0.489555	insig
MW0150520	Gly-Tyr-Phe	Amino acids and derivatives	Amino acids and derivatives	C20H23N3O5	3	0.6253	-	13309.4	14858	12976.4	11300.1	8782.54	12169.5	1.11041	0.0804058	0.212296	1.27569	0.351275	insig
MW0157598	Thr-Cys-Asp	Amino acids and derivatives	Amino acids and derivatives	C11H19N3O7S1	3	0.6248	-	66940.9	53060.5	76009.4	54275.2	59952.2	54264	0.787334	0.301293	0.490041	1.16333	0.218259	insig
MW0153563	Met-His-Asn	Amino acids and derivatives	Amino acids and derivatives	C15H24N6O5S1	3	0.6245	-	17199.8	11593.5	17483.6	14431.2	261.85	12386.4	0.698391	0.284496	0.473612	1.70893	0.77309	insig
MW0109101	Phe-Cys-Lys	Amino acids and derivatives	Amino acids and derivatives	C18H28N4O4S1	3	0.6245	-	96400.5	112987	111574	66490.6	70077.6	67940.1	1.4195	0.0153968	0.0716031	1.56943	0.65024	insig
ZINC95910636	1,3-dihydroxy-9-oxo-5-[(2S,3R,4S,5S,6R)-3,4,5-trihydroxy-6-(hydroxymethyl)oxan-2-yl]oxyxanthene-4-sulfonic acid	Organic acids	Organic acids	C19H18O13S	3	0.6244	-	1.29726e+06	1.4642e+06	1.4652e+06	1.57823e+06	1.54116e+06	1556745	1.1393	0.11039	0.260745	0.903878	-0.1458	insig
MW0153514	Met-Asp-Glu	Amino acids and derivatives	Amino acids and derivatives	C14H23N3O8S1	3	0.6241	-	11350.1	10826.4	2445.87	2642.73	3695.5	3348.12	0.852462	0.225482	0.409709	2.54196	1.34594	insig
MW0110059	Trp-Gln-Lys	Amino acids and derivatives	Amino acids and derivatives	C22H32N6O5	3	0.6238	-	21192.9	26486.9	26004.9	48502	55529.3	63104.4	1.41376	0.00959359	0.0537988	0.440867	-1.18158	down
MW0147560	cis-N-methyl-alpha-berbine	Alkaloids	Alkaloids	C18H20N+	3	0.6238	-	3142.35	4080.63	4923.51	7998.43	176.2	9945.59	0.27355	0.575179	0.719393	0.670328	-0.577061	insig
MW0155416	Phe-Val-Trp	Amino acids and derivatives	Amino acids and derivatives	C25H30N4O4	3	0.6231	-	992319	62214.6	669778	595874	34874.7	772143	0.173842	0.776476	0.864849	1.22911	0.297617	insig
MW0129831	12a-HYDROXY-5-DEOXYDEHYDROMUNDUSERONE	Others	Ketone compounds	C19H18O6	3	0.6227	-	970.57	518.92	1360.33	530.21	1495.06	1652.67	0.333836	0.557129	0.704625	0.774841	-0.368027	insig
MW0142535	2-Oxo-3-(5-oxofuran-2-ylidene)propanoic acid	Others	Lactones	C7H4O5	3	0.6221	-	1.37469e+06	1.33676e+06	1.29952e+06	498420	528514	512635	1.45719	0.000137844	0.0054494	2.60526	1.38143	up
MW0143952	7-Dehydrologanin tetraacetate	Others	Lactones	C25H32O14	3	0.6217	-	3407.54	3281.4	2840.7	5278.43	4729.75	4607.69	1.38811	0.00358094	0.0289346	0.652006	-0.617042	insig
MW0153118	Lys-Pro-Met	Amino acids and derivatives	Amino acids and derivatives	C16H30N4O4S1	3	0.6217	-	1775.98	972.91	2724.62	1111.98	1431.14	2262.65	0.177528	0.736673	0.837166	1.13895	0.187699	insig
MW0145928	Asn-Tyr-Gln	Amino acids and derivatives	Amino acids and derivatives	C18H25N5O7	3	0.6215	-	1039.98	466.69	1301.16	737.93	711.65	985.24	0.146921	0.672824	0.7911	1.1532	0.20564	insig
MW0150199	Glu-Tyr-Trp	Amino acids and derivatives	Amino acids and derivatives	C25H28N4O7	3	0.6213	-	230691	231033	213451	115453	42430.8	141183	1.14034	0.0467864	0.144998	2.2576	1.17479	up
MW0157754	Thr-Phe-Cys	Amino acids and derivatives	Amino acids and derivatives	C16H23N3O5S1	3	0.6206	-	225.86	3154.51	77.21	5257.59	1182.54	5476.44	0.965898	0.183443	0.361626	0.290149	-1.78513	insig
MW0169875	Stearidonic Acid ethyl ester	Lipids	Free fatty acids	C20H32O2	3	0.6194	-	10968.4	4556.72	1665.06	1121.41	1291.36	4011.56	0.799251	0.321552	0.508791	2.67579	1.41996	insig
MW0158925	Val-Asn-Trp	Amino acids and derivatives	Amino acids and derivatives	C20H27N5O5	3	0.6191	-	8525.11	22202.4	26498.7	24493.2	26926.4	27620.3	0.757132	0.310712	0.500139	0.724016	-0.465906	insig
MW0166643	19-(4-Hydroxyphenyl)nonadecanoate	Lipids	Free fatty acids	C25H41O3-	3	0.619	-	2123.2	1159.49	354.92	541.23	385.04	110.4	0.94452	0.227817	0.412836	3.50894	1.81103	insig
ZINC42852588	Lonijaposide C	Organic acids	Organic acids	C24H30NO12+	3	0.6185	-	2469.29	1432.64	1710.66	3759.38	1516.63	364.18	0.361102	0.993652	0.996866	0.995107	-0.00707709	insig
MW0126657	Termitomycamide B	Alcohol and amines	Amines	C28H40N2O2	3	0.6182	-	35917.9	105238	60551.4	65711.2	93967.6	90565.6	0.599327	0.522619	0.677638	0.806043	-0.311072	insig
MW0156050	Pro-Val-Ile	Amino acids and derivatives	Amino acids and derivatives	C16H29N3O4	3	0.6172	-	38235.6	46023.3	38637.8	24024.5	28686.2	32244.9	1.27236	0.0221142	0.0904303	1.4466	0.532665	insig
MW0158359	Tyr-Ala-Met	Amino acids and derivatives	Amino acids and derivatives	C17H25N3O5S1	3	0.6172	-	218014	228498	240774	209209	210092	278383	0.0490178	0.896028	0.942064	0.985096	-0.0216643	insig
MW0140695	[3-(3,4-Methylenedioxyphenyl)-2-(mercaptomethyl)-1-oxoprolyl]glycine	Organic acids	Organic acids	C15H18N2O6S	3	0.6163	-	28908.4	32023.6	28868.5	21016.6	20498.9	20816.1	1.43259	0.0114963	0.0600897	1.44069	0.52676	insig
MW0158489	Tyr-His-Ser	Amino acids and derivatives	Amino acids and derivatives	C18H23N5O6	3	0.6161	-	27765.4	20048.6	18644.2	38898.7	35066.7	26986.2	1.15238	0.0661722	0.184258	0.658317	-0.603145	insig
MW0156908	Ser-Ser-Gly	Amino acids and derivatives	Amino acids and derivatives	C8H15N3O6	3	0.6156	-	2195.34	1287.32	1573.36	5317.1	2925.68	4857.14	1.29766	0.0536064	0.159986	0.385958	-1.37348	down
ZINC95911933	Hydrangenoside A	Benzene and substituted derivatives	Benzene and substituted derivatives	C31H40O13	3	0.6154	-	5563.27	396.56	164.4	1992.89	801.38	2235.14	0.474754	0.857528	0.918292	1.21768	0.284139	insig
MW0140437	(5aS)-5,5a-dihydrophenazine-1,6-dicarboxylic acid	Organic acids	Organic acids	C14H10N2O4	3	0.6146	-	1909.84	1283.91	1309.8	8392.75	8933.25	4557.44	1.3887	0.0493772	0.151168	0.205797	-2.2807	down
MW0150197	Glu-Tyr-Phe	Amino acids and derivatives	Amino acids and derivatives	C23H27N3O7	3	0.6142	-	364.17	477.96	189.8	548.96	497.06	554.2	0.986284	0.14676	0.312426	0.644868	-0.632925	insig
[truncated: 2,057 more rows]
