# Supplementary material
Source: Research Square preprint supplement (doi:10.21203/rs.3.rs-9447148/v1)
Supplement: Supplementary file 3 [file 429ec70b1662db2181c476a0.xlsx]

## Sheet: Sheet1
Table S9 Correlation network visualization of Amino sugar and nucleotide sugar metabolism pathway in root
geneID	KO	KEGG_map_gene	mw_KO	mw_KEGG_map	metaID	Compounds	Class I	CID	KEGG_map_meta	coefficient	pvalue	relationType
LOC_Os05g15770	K01183	ko00520,ko01100	--	--	MW0114000	beta-L-fucose 1-phosphate	Organic acids	C02985	ko00051,ko00520,ko01100,ko01250	-0.883932	0.000136114	gene-meta
LOC_Os06g51060	K20547	ko00520,ko01100,ko04016	--	--	MW0114000	beta-L-fucose 1-phosphate	Organic acids	C02985	ko00051,ko00520,ko01100,ko01250	-0.802552	0.00167873	gene-meta
LOC_Os10g39680	K20547	ko00520,ko01100,ko04016	--	--	MW0114000	beta-L-fucose 1-phosphate	Organic acids	C02985	ko00051,ko00520,ko01100,ko01250	-0.819604	0.0011019	gene-meta
LOC_Os01g19220	K15920	ko00520,ko01100	--	--	MW0114000	beta-L-fucose 1-phosphate	Organic acids	C02985	ko00051,ko00520,ko01100,ko01250	0.818814	0.00112463	gene-meta
LOC_Os04g27980	K01183	ko00520,ko01100	--	--	MW0114000	beta-L-fucose 1-phosphate	Organic acids	C02985	ko00051,ko00520,ko01100,ko01250	-0.805152	0.00157845	gene-meta
LOC_Os08g40680	K01183	ko00520,ko01100	--	--	MW0114000	beta-L-fucose 1-phosphate	Organic acids	C02985	ko00051,ko00520,ko01100,ko01250	-0.829376	0.00084876	gene-meta
LOC_Os11g47500	K01183	ko00520,ko01100	--	--	MW0114000	beta-L-fucose 1-phosphate	Organic acids	C02985	ko00051,ko00520,ko01100,ko01250	-0.898968	6.98207e-05	gene-meta
novel.646	K01209	ko00520,ko01100	--	--	MW0114000	beta-L-fucose 1-phosphate	Organic acids	C02985	ko00051,ko00520,ko01100,ko01250	-0.801624	0.00171569	gene-meta
LOC_Os06g25010	K01183	ko00520,ko01100	--	--	MW0114000	beta-L-fucose 1-phosphate	Organic acids	C02985	ko00051,ko00520,ko01100,ko01250	-0.87152	0.000221356	gene-meta
LOC_Os10g39700	K20547	ko00520,ko01100,ko04016	--	--	MW0114000	beta-L-fucose 1-phosphate	Organic acids	C02985	ko00051,ko00520,ko01100,ko01250	-0.804932	0.00158672	gene-meta
LOC_Os06g51160	K13648	ko00520,ko01100	--	--	MW0114000	beta-L-fucose 1-phosphate	Organic acids	C02985	ko00051,ko00520,ko01100,ko01250	-0.964174	4.37684e-07	gene-meta
LOC_Os06g08620	K13379	ko00520,ko01100,ko01250	--	--	MW0114000	beta-L-fucose 1-phosphate	Organic acids	C02985	ko00051,ko00520,ko01100,ko01250	0.96602	3.36971e-07	gene-meta
LOC_Os03g20420	K01209	ko00520,ko01100	--	--	MEDP0067	2-Acetamido-2-Deoxy-D-Mannopyranose	Others	C00645	ko00520,ko01100,ko01250	0.969487	1.97913e-07	gene-meta
LOC_Os06g51060	K20547	ko00520,ko01100,ko04016	--	--	MEDP0067	2-Acetamido-2-Deoxy-D-Mannopyranose	Others	C00645	ko00520,ko01100,ko01250	-0.881975	0.000147474	gene-meta
LOC_Os11g03730	K01209	ko00520,ko01100	--	--	MEDP0067	2-Acetamido-2-Deoxy-D-Mannopyranose	Others	C00645	ko00520,ko01100,ko01250	0.952518	1.75468e-06	gene-meta
LOC_Os12g25690	K00012	ko00040,ko00053,ko00520,ko01100,ko01240,ko01250	--	--	MEDP0067	2-Acetamido-2-Deoxy-D-Mannopyranose	Others	C00645	ko00520,ko01100,ko01250	0.936768	7.15488e-06	gene-meta
LOC_Os09g35800	K01784	ko00052,ko00520,ko01100,ko01250	KM0288	MetMap170	MEDP0067	2-Acetamido-2-Deoxy-D-Mannopyranose	Others	C00645	ko00520,ko01100,ko01250	-0.906144	4.89083e-05	gene-meta
LOC_Os01g19220	K15920	ko00520,ko01100	--	--	MEDP0067	2-Acetamido-2-Deoxy-D-Mannopyranose	Others	C00645	ko00520,ko01100,ko01250	0.897392	7.52315e-05	gene-meta
LOC_Os12g36890	K00770	ko00520,ko01100	KM0228	MetMap131	MEDP0067	2-Acetamido-2-Deoxy-D-Mannopyranose	Others	C00645	ko00520,ko01100,ko01250	0.949688	2.33267e-06	gene-meta
LOC_Os09g12660	K00975	ko00500,ko00520,ko01100,ko01110,ko01250	--	--	MEDP0067	2-Acetamido-2-Deoxy-D-Mannopyranose	Others	C00645	ko00520,ko01100,ko01250	-0.824166	0.000977364	gene-meta
LOC_Os04g49250	K00012	ko00040,ko00053,ko00520,ko01100,ko01240,ko01250	--	--	MEDP0067	2-Acetamido-2-Deoxy-D-Mannopyranose	Others	C00645	ko00520,ko01100,ko01250	0.947113	2.9807e-06	gene-meta
LOC_Os03g30470	K20547	ko00520,ko01100,ko04016	--	--	MEDP0067	2-Acetamido-2-Deoxy-D-Mannopyranose	Others	C00645	ko00520,ko01100,ko01250	0.926997	1.44329e-05	gene-meta
LOC_Os11g47510	K01183	ko00520,ko01100	--	--	MEDP0067	2-Acetamido-2-Deoxy-D-Mannopyranose	Others	C00645	ko00520,ko01100,ko01250	0.925024	1.64367e-05	gene-meta
LOC_Os09g35800	K01784	ko00052,ko00520,ko01100,ko01250	KM0288	MetMap170	MEDP0232	N-Acetyl-D-glucosamine	Alcohol and amines	C00140	ko00520,ko01100,ko01250,ko02010	0.809908	0.00140696	gene-meta
LOC_Os10g11140	K01835	ko00010,ko00030,ko00052,ko00230,ko00500,ko00520,ko01100,ko01110,ko01250	--	--	MEDP0232	N-Acetyl-D-glucosamine	Alcohol and amines	C00140	ko00520,ko01100,ko01250,ko02010	0.844286	0.000551714	gene-meta
LOC_Os07g38790	K12373	ko00511,ko00513,ko00520,ko00531,ko00600,ko00603,ko00604,ko01100	--	--	MEDP0232	N-Acetyl-D-glucosamine	Alcohol and amines	C00140	ko00520,ko01100,ko01250,ko02010	0.826889	0.000908401	gene-meta
LOC_Os03g20420	K01209	ko00520,ko01100	--	--	MW0103681	Uridine-5'-diphosphogalactose disodium salt	Nucleotides and derivatives	C00052	ko00052,ko00520,ko01100,ko01250	0.855224	0.000390796	gene-meta
LOC_Os05g15770	K01183	ko00520,ko01100	--	--	MW0103681	Uridine-5'-diphosphogalactose disodium salt	Nucleotides and derivatives	C00052	ko00052,ko00520,ko01100,ko01250	-0.824365	0.000972205	gene-meta
LOC_Os06g51060	K20547	ko00520,ko01100,ko04016	--	--	MW0103681	Uridine-5'-diphosphogalactose disodium salt	Nucleotides and derivatives	C00052	ko00052,ko00520,ko01100,ko01250	-0.882354	0.000145221	gene-meta
LOC_Os11g03730	K01209	ko00520,ko01100	--	--	MW0103681	Uridine-5'-diphosphogalactose disodium salt	Nucleotides and derivatives	C00052	ko00052,ko00520,ko01100,ko01250	0.817537	0.00116218	gene-meta
LOC_Os12g25690	K00012	ko00040,ko00053,ko00520,ko01100,ko01240,ko01250	--	--	MW0103681	Uridine-5'-diphosphogalactose disodium salt	Nucleotides and derivatives	C00052	ko00052,ko00520,ko01100,ko01250	0.81216	0.00133091	gene-meta
LOC_Os01g19220	K15920	ko00520,ko01100	--	--	MW0103681	Uridine-5'-diphosphogalactose disodium salt	Nucleotides and derivatives	C00052	ko00052,ko00520,ko01100,ko01250	0.93959	5.72222e-06	gene-meta
LOC_Os12g36890	K00770	ko00520,ko01100	KM0228	MetMap131	MW0103681	Uridine-5'-diphosphogalactose disodium salt	Nucleotides and derivatives	C00052	ko00052,ko00520,ko01100,ko01250	0.822648	0.00101752	gene-meta
LOC_Os11g47500	K01183	ko00520,ko01100	--	--	MW0103681	Uridine-5'-diphosphogalactose disodium salt	Nucleotides and derivatives	C00052	ko00052,ko00520,ko01100,ko01250	-0.878354	0.000170447	gene-meta
LOC_Os04g49250	K00012	ko00040,ko00053,ko00520,ko01100,ko01240,ko01250	--	--	MW0103681	Uridine-5'-diphosphogalactose disodium salt	Nucleotides and derivatives	C00052	ko00052,ko00520,ko01100,ko01250	0.810766	0.00137759	gene-meta
LOC_Os03g30470	K20547	ko00520,ko01100,ko04016	--	--	MW0103681	Uridine-5'-diphosphogalactose disodium salt	Nucleotides and derivatives	C00052	ko00052,ko00520,ko01100,ko01250	0.883313	0.000139628	gene-meta
LOC_Os11g47510	K01183	ko00520,ko01100	--	--	MW0103681	Uridine-5'-diphosphogalactose disodium salt	Nucleotides and derivatives	C00052	ko00052,ko00520,ko01100,ko01250	0.840491	0.00061814	gene-meta
LOC_Os05g15770	K01183	ko00520,ko01100	--	--	MW0103583	Guanosine diphosphate mannose	Nucleotides and derivatives	C00096	ko00051,ko00053,ko00510,ko00520,ko01100,ko01110,ko01240,ko01250	-0.822443	0.00102306	gene-meta
LOC_Os03g20420	K01209	ko00520,ko01100	--	--	MW0115006	GcNeu	Organic acids	C03410	ko00520	0.971424	1.43043e-07	gene-meta
LOC_Os06g51060	K20547	ko00520,ko01100,ko04016	--	--	MW0115006	GcNeu	Organic acids	C03410	ko00520	-0.915934	2.86756e-05	gene-meta
LOC_Os11g03730	K01209	ko00520,ko01100	--	--	MW0115006	GcNeu	Organic acids	C03410	ko00520	0.955064	1.33786e-06	gene-meta
LOC_Os12g25690	K00012	ko00040,ko00053,ko00520,ko01100,ko01240,ko01250	--	--	MW0115006	GcNeu	Organic acids	C03410	ko00520	0.919086	2.38169e-05	gene-meta
LOC_Os09g35800	K01784	ko00052,ko00520,ko01100,ko01250	KM0288	MetMap170	MW0115006	GcNeu	Organic acids	C03410	ko00520	-0.878574	0.000168979	gene-meta
LOC_Os01g19220	K15920	ko00520,ko01100	--	--	MW0115006	GcNeu	Organic acids	C03410	ko00520	0.881021	0.000153274	gene-meta
LOC_Os12g36890	K00770	ko00520,ko01100	KM0228	MetMap131	MW0115006	GcNeu	Organic acids	C03410	ko00520	0.935571	7.84214e-06	gene-meta
LOC_Os04g49250	K00012	ko00040,ko00053,ko00520,ko01100,ko01240,ko01250	--	--	MW0115006	GcNeu	Organic acids	C03410	ko00520	0.937341	6.84314e-06	gene-meta
LOC_Os03g30470	K20547	ko00520,ko01100,ko04016	--	--	MW0115006	GcNeu	Organic acids	C03410	ko00520	0.942317	4.56313e-06	gene-meta
LOC_Os11g47510	K01183	ko00520,ko01100	--	--	MW0115006	GcNeu	Organic acids	C03410	ko00520	0.928523	1.30205e-05	gene-meta
LOC_Os05g15770	K01183	ko00520,ko01100	--	--	MEDN1221	Mannose 6-phosphate	Others	C00275	ko00051,ko00520,ko01100,ko01110,ko01240,ko01250	-0.916645	2.75164e-05	gene-meta
LOC_Os01g19220	K15920	ko00520,ko01100	--	--	MEDN1221	Mannose 6-phosphate	Others	C00275	ko00051,ko00520,ko01100,ko01110,ko01240,ko01250	0.809104	0.00143487	gene-meta
LOC_Os08g40680	K01183	ko00520,ko01100	--	--	MEDN1221	Mannose 6-phosphate	Others	C00275	ko00051,ko00520,ko01100,ko01110,ko01240,ko01250	-0.80421	0.00161422	gene-meta
LOC_Os11g47500	K01183	ko00520,ko01100	--	--	MEDN1221	Mannose 6-phosphate	Others	C00275	ko00051,ko00520,ko01100,ko01110,ko01240,ko01250	-0.903609	5.56352e-05	gene-meta
LOC_Os06g25010	K01183	ko00520,ko01100	--	--	MEDN1221	Mannose 6-phosphate	Others	C00275	ko00051,ko00520,ko01100,ko01110,ko01240,ko01250	-0.838281	0.000659562	gene-meta
LOC_Os06g51160	K13648	ko00520,ko01100	--	--	MEDN1221	Mannose 6-phosphate	Others	C00275	ko00051,ko00520,ko01100,ko01110,ko01240,ko01250	-0.909726	4.05112e-05	gene-meta
LOC_Os06g08620	K13379	ko00520,ko01100,ko01250	--	--	MEDN1221	Mannose 6-phosphate	Others	C00275	ko00051,ko00520,ko01100,ko01110,ko01240,ko01250	0.941578	4.85686e-06	gene-meta
LOC_Os03g20420	K01209	ko00520,ko01100	--	--	MW0112794	Keto-Deoxy-Nonulonic acid	Organic acids	C20934	ko00520,ko01100,ko01250	0.910018	3.98803e-05	gene-meta
LOC_Os06g51060	K20547	ko00520,ko01100,ko04016	--	--	MW0112794	Keto-Deoxy-Nonulonic acid	Organic acids	C20934	ko00520,ko01100,ko01250	-0.977015	4.86191e-08	gene-meta
LOC_Os11g03730	K01209	ko00520,ko01100	--	--	MW0112794	Keto-Deoxy-Nonulonic acid	Organic acids	C20934	ko00520,ko01100,ko01250	0.877915	0.000173411	gene-meta
LOC_Os12g25690	K00012	ko00040,ko00053,ko00520,ko01100,ko01240,ko01250	--	--	MW0112794	Keto-Deoxy-Nonulonic acid	Organic acids	C20934	ko00520,ko01100,ko01250	0.822125	0.00103165	gene-meta
LOC_Os01g19220	K15920	ko00520,ko01100	--	--	MW0112794	Keto-Deoxy-Nonulonic acid	Organic acids	C20934	ko00520,ko01100,ko01250	0.901411	6.20396e-05	gene-meta
LOC_Os12g36890	K00770	ko00520,ko01100	KM0228	MetMap131	MW0112794	Keto-Deoxy-Nonulonic acid	Organic acids	C20934	ko00520,ko01100,ko01250	0.841246	0.000604458	gene-meta
LOC_Os11g47500	K01183	ko00520,ko01100	--	--	MW0112794	Keto-Deoxy-Nonulonic acid	Organic acids	C20934	ko00520,ko01100,ko01250	-0.836723	0.000690053	gene-meta
LOC_Os04g49250	K00012	ko00040,ko00053,ko00520,ko01100,ko01240,ko01250	--	--	MW0112794	Keto-Deoxy-Nonulonic acid	Organic acids	C20934	ko00520,ko01100,ko01250	0.8709	0.000226506	gene-meta
LOC_Os03g30470	K20547	ko00520,ko01100,ko04016	--	--	MW0112794	Keto-Deoxy-Nonulonic acid	Organic acids	C20934	ko00520,ko01100,ko01250	0.935045	8.1604e-06	gene-meta
LOC_Os11g47510	K01183	ko00520,ko01100	--	--	MW0112794	Keto-Deoxy-Nonulonic acid	Organic acids	C20934	ko00520,ko01100,ko01250	0.888295	0.000113241	gene-meta
