# Supplementary material
Source: Research Square preprint supplement (doi:10.21203/rs.3.rs-9447148/v1)
Supplement: Supplementary file 4 [file 46d839c6b44394dcc729ff5d.xlsx]

## Sheet: Sheet1
Table S5 DEGs identified between control conditions and salt conditions in shoot(CK_Shoot vs. Salt_Shoot)
ID	baseMean	CK_Shoot	Salt_Shoot	log2FoldChange	pvalue	padj	regulated
LOC_Os01g09700	1931.11	664.068	3198.14	2.2666	0	0	up
LOC_Os01g12270	3892.89	1375.92	6409.86	2.21929	0	0	up
LOC_Os01g24710	4129.96	2025.96	6233.97	1.6207	0	0	up
LOC_Os01g25484	5447.74	2277.88	8617.59	1.9192	0	0	up
LOC_Os01g41710	3245.28	5678.54	812.025	-2.80682	0	0	down
LOC_Os01g43120	4956.53	2615.47	7297.59	1.48059	0	0	up
LOC_Os01g45470	8331.71	12506.9	4156.56	-1.5888	0	0	down
LOC_Os01g45914	98932.9	62514.9	135351	1.11442	0	0	up
LOC_Os01g46720	32810.4	14575.2	51045.5	1.80823	0	0	up
LOC_Os01g68770	6316.57	3197.73	9435.42	1.56059	0	0	up
LOC_Os02g01590	7301.08	12038.1	2564.04	-2.23211	0	0	down
LOC_Os02g08440	3296.82	5473.67	1119.96	-2.29102	0	0	down
LOC_Os02g10390	4338.79	6578.99	2098.59	-1.64938	0	0	down
LOC_Os02g43500	5074.92	2726.93	7422.9	1.44438	0	0	up
LOC_Os02g47470	3378.1	5216.09	1540.11	-1.75865	0	0	down
LOC_Os02g48900	3943.53	5849.52	2037.53	-1.52196	0	0	down
LOC_Os02g51350	2719.63	4236.16	1203.1	-1.81458	0	0	down
LOC_Os02g56250	3730.87	5917.68	1544.06	-1.93625	0	0	down
LOC_Os03g02750	1007.13	1844.66	169.601	-3.44974	0	0	down
LOC_Os03g07360	3604.77	6027.99	1181.54	-2.35024	0	0	down
LOC_Os03g08330	806.889	1482.31	131.463	-3.49602	0	0	down
LOC_Os03g09250	9475.76	13527.7	5423.85	-1.31885	0	0	down
LOC_Os03g14050	3612.98	1376.43	5849.54	2.08679	0	0	up
LOC_Os03g19427	6072.43	2754.54	9390.32	1.76895	0	0	up
LOC_Os03g22634	2629.36	4801.33	457.399	-3.38691	0	0	down
LOC_Os03g28330	8209.07	12916.2	3501.94	-1.88347	0	0	down
LOC_Os03g28940	2403.9	3744.7	1063.1	-1.81658	0	0	down
LOC_Os03g39610	2117.87	3550.21	685.534	-2.37149	0	0	down
LOC_Os03g54130	8575.77	12258.5	4893.02	-1.32488	0	0	down
LOC_Os03g63950	14392	3679.33	25104.7	2.77023	0	0	up
LOC_Os04g41570	2128.17	3632.1	624.226	-2.53918	0	0	down
LOC_Os04g41620	3992.7	1465.55	6519.85	2.15382	0	0	up
LOC_Os04g41640	2411.25	964.152	3858.35	2.00029	0	0	up
LOC_Os04g43800	947.206	1782.92	111.496	-3.98234	0	0	down
LOC_Os04g50970	5995.64	9095.92	2895.37	-1.65204	0	0	down
LOC_Os04g51880	2928.81	1379.37	4478.24	1.69852	0	0	up
LOC_Os04g56430	1229.92	94.1114	2365.72	4.64797	0	0	up
LOC_Os05g06920	5754.06	9199.25	2308.86	-1.99229	0	0	down
LOC_Os05g15770	6375.94	2696.02	10055.9	1.89935	0	0	up
LOC_Os05g27780	3877.28	1449.58	6304.97	2.12108	0	0	up
LOC_Os05g46480	4055.75	1731.43	6380.07	1.88198	0	0	up
LOC_Os05g49800	8943.67	5124.72	12762.6	1.31625	0	0	up
LOC_Os06g03860	5657.36	2890.41	8424.31	1.54307	0	0	up
LOC_Os06g04920	913.355	1624.14	202.572	-3.00699	0	0	down
LOC_Os06g05440	2203.12	820.774	3585.47	2.12637	0	0	up
LOC_Os06g06290	8469	12568.6	4369.41	-1.52484	0	0	down
LOC_Os06g21590	3925.27	5926.91	1923.63	-1.62302	0	0	down
LOC_Os06g37150	1713.77	558.466	2869.07	2.36063	0	0	up
LOC_Os06g45140	1251.77	2343	160.535	-3.87855	0	0	down
LOC_Os07g02800	1953.28	712.555	3194.01	2.16449	0	0	up
LOC_Os07g37550	2903.92	4990.93	816.913	-2.61062	0	0	down
LOC_Os07g42370	11115.8	16000.9	6230.8	-1.36046	0	0	down
LOC_Os07g46670	1766.69	2993.62	539.758	-2.47269	0	0	down
LOC_Os08g04500	23391.6	37848.7	8934.5	-2.08323	0	0	down
LOC_Os08g10320	4938.67	2131.72	7745.63	1.86151	0	0	up
LOC_Os08g33820	3129.34	5310.64	948.052	-2.48335	0	0	down
LOC_Os08g38990	1262.3	371.491	2153.11	2.53581	0	0	up
LOC_Os09g12290	2177.04	634.329	3719.76	2.55236	0	0	up
LOC_Os09g17740	2758.73	4679.82	837.645	-2.48194	0	0	down
LOC_Os09g36680	2070.52	485.118	3655.93	2.91542	0	0	up
LOC_Os09g37910	6095.62	9377.45	2813.79	-1.73792	0	0	down
LOC_Os09g38130	4165.86	6792.61	1539.11	-2.14176	0	0	down
LOC_Os10g05990	3149.62	4786.94	1512.31	-1.66257	0	0	down
LOC_Os10g17260	1848.37	3265.99	430.763	-2.92006	0	0	down
LOC_Os10g42610	2783.75	718.163	4849.33	2.75409	0	0	up
LOC_Os11g13890	5871.67	9937.27	1806.08	-2.4591	0	0	down
LOC_Os11g38810	3270.97	5311.68	1230.26	-2.11044	0	0	down
LOC_Os12g08760	18867.2	28797.5	8937	-1.68791	0	0	down
LOC_Os12g08810	78815.3	109363	48267.7	-1.18001	0	0	down
LOC_Os12g36110	1252.41	2147.36	357.46	-2.5927	0	0	down
novel.870	2850.67	5258.99	442.359	-3.57828	0	0	down
LOC_Os08g15050	775.546	1442.64	108.452	-3.74137	2.58509e-306	8.15237e-304	down
LOC_Os12g33610	8784.97	12772.9	4797.03	-1.41309	1.73476e-303	5.39583e-301	down
LOC_Os05g49700	738.818	1404.14	73.4973	-4.26726	2.17476e-303	6.67298e-301	down
LOC_Os07g39350	9583.99	13398	5769.99	-1.21535	9.32611e-302	2.82345e-299	down
LOC_Os02g52210	1386.66	2302.95	470.373	-2.28986	5.01962e-301	1.49968e-298	down
LOC_Os05g04380	5094.99	7444.56	2745.42	-1.43898	3.49328e-295	1.03011e-292	down
LOC_Os06g50230	2299.29	1067.72	3530.86	1.72519	2.42708e-294	7.06529e-292	up
LOC_Os06g15330	3856.34	1883.26	5829.41	1.63015	9.80671e-294	2.81862e-291	up
LOC_Os04g43650	3252.74	4855.74	1649.73	-1.55859	7.06864e-293	2.00626e-290	down
LOC_Os02g03410	1767.68	2854.59	680.777	-2.06509	2.63075e-292	7.37453e-290	down
LOC_Os04g17100	11436.6	16575	6298.13	-1.39592	4.82994e-289	1.33742e-286	down
LOC_Os01g14850	1576.26	2548.35	604.171	-2.07782	1.47009e-288	4.02167e-286	down
LOC_Os02g48980	1275.09	2121.56	428.62	-2.30716	1.39255e-287	3.76419e-285	down
LOC_Os02g38920	8073.77	4142.29	12005.3	1.53551	4.10064e-287	1.0954e-284	up
LOC_Os07g41200	3355.28	4968.75	1741.81	-1.51202	5.21452e-286	1.37676e-283	down
LOC_Os01g72330	2027.91	886.84	3168.99	1.83654	5.42391e-285	1.41558e-282	up
LOC_Os01g60830	5963.26	8635.92	3290.6	-1.39102	1.29957e-276	3.35318e-274	down
LOC_Os02g32990	976.127	1674.31	277.94	-2.59411	2.27095e-276	5.79373e-274	down
LOC_Os03g17100	1395.94	2376.68	415.194	-2.50927	2.96917e-276	7.49088e-274	down
LOC_Os09g31482	2099.8	888.725	3310.88	1.89621	3.85112e-276	9.60917e-274	up
LOC_Os03g02514	2800.45	4243.57	1357.33	-1.64383	4.62768e-276	1.14213e-273	down
LOC_Os02g36340	10163.7	13869.1	6458.22	-1.10268	9.47672e-275	2.28913e-272	down
LOC_Os08g08850	1440.47	2343.17	537.766	-2.12594	5.97247e-274	1.42748e-271	down
LOC_Os05g28740	1102.62	356.83	1848.41	2.37243	4.59769e-273	1.08745e-270	up
LOC_Os01g06310	783.13	138.21	1428.05	3.36568	4.70675e-272	1.10177e-269	up
LOC_Os01g71670	1426.61	543.252	2309.97	2.08827	5.00593e-270	1.15984e-267	up
LOC_Os05g37930	3041.91	4536.92	1546.9	-1.55166	3.58954e-268	8.23273e-266	down
LOC_Os10g36260	2757.76	1351.44	4164.09	1.62363	1.49923e-264	3.40416e-262	up
LOC_Os06g06250	2300.79	3491.53	1110.05	-1.65424	1.09706e-261	2.46633e-259	down
LOC_Os01g15270	32537.8	18885.4	46190.3	1.29021	1.95086e-260	4.34276e-258	up
LOC_Os06g04070	10278.1	14436.1	6120.13	-1.23795	2.22076e-260	4.89559e-258	down
LOC_Os03g19250	2031.02	931.64	3130.39	1.74859	1.21798e-258	2.65917e-256	up
LOC_Os07g48100	6796.53	9671.91	3921.16	-1.30177	3.0385e-258	6.57069e-256	down
LOC_Os10g39140	2187.19	3358.09	1016.3	-1.72396	3.12466e-258	6.69326e-256	down
LOC_Os01g73200	1702.36	696.154	2708.57	1.95931	4.79242e-257	1.01698e-254	up
LOC_Os01g53090	2382.73	292.503	4472.96	3.93386	9.09585e-257	1.91232e-254	up
LOC_Os05g37080	637.653	1230.55	44.7565	-4.78672	1.21893e-254	2.53918e-252	down
LOC_Os10g05970	3581.08	5183.42	1978.75	-1.38895	1.60585e-253	3.31476e-251	down
LOC_Os11g29370	5520.43	3342.85	7698.01	1.20327	2.41682e-253	4.94382e-251	up
LOC_Os04g16450	4518.38	6428.9	2607.87	-1.3013	4.99843e-253	1.01334e-250	down
LOC_Os01g67860	12201.5	7457.09	16946	1.18396	1.55346e-252	3.12149e-250	up
LOC_Os07g23120	914.733	1587.05	242.419	-2.71621	1.38785e-250	2.76426e-248	down
LOC_Os10g25290	998.702	1692.19	305.215	-2.46902	1.83987e-250	3.63269e-248	down
LOC_Os01g04800	2332.17	1146.46	3517.88	1.61804	9.40497e-249	1.84094e-246	up
LOC_Os11g29290	721.351	1294.27	148.434	-3.1206	2.31384e-248	4.49044e-246	down
LOC_Os04g38680	1301.69	510.102	2093.28	2.0378	2.5104e-248	4.83061e-246	up
LOC_Os03g58470	3980.63	5826.24	2135.01	-1.45037	3.71873e-248	7.09559e-246	down
LOC_Os03g55070	5429.99	7570.1	3289.89	-1.20256	8.54393e-248	1.61665e-245	down
LOC_Os01g20830	2310.12	1154.84	3465.4	1.58561	2.44994e-246	4.59738e-244	up
LOC_Os03g07530	6167.69	9024.42	3310.97	-1.44572	6.63937e-246	1.23568e-243	down
LOC_Os04g57550	2684.65	3961.89	1407.42	-1.49429	1.94768e-245	3.59544e-243	down
LOC_Os01g51890	1787.36	2791.4	783.325	-1.83021	1.14158e-242	2.09039e-240	down
LOC_Os02g46460	1072.61	358.848	1786.37	2.31354	4.32256e-239	7.85184e-237	up
LOC_Os08g34720	2074.05	3164.88	983.212	-1.68558	1.07418e-238	1.93573e-236	down
LOC_Os10g02040	1038.35	1732.49	344.208	-2.32894	4.70677e-238	8.41511e-236	down
LOC_Os03g14654	6799.27	10193.3	3405.26	-1.58288	7.0505e-236	1.25069e-233	down
LOC_Os07g48040	1549.59	2447.73	651.459	-1.91086	2.18174e-235	3.8402e-233	down
LOC_Os08g25720	3475.61	1965.21	4986.01	1.34291	8.25831e-234	1.44241e-231	up
LOC_Os11g41710	919.143	1545.43	292.857	-2.39933	2.37027e-233	4.10835e-231	down
LOC_Os03g62090	2558.87	3750.34	1367.4	-1.45568	3.30188e-233	5.67973e-231	down
LOC_Os03g19420	5247.76	2788.36	7707.15	1.46662	2.6272e-232	4.4852e-230	up
LOC_Os04g59330	2137.34	3222.57	1052.11	-1.61504	2.34485e-231	3.9733e-229	down
LOC_Os04g33830	3012	4356.78	1667.22	-1.38606	4.59781e-231	7.73317e-229	down
LOC_Os03g20370	4423.41	6199.53	2647.28	-1.22801	6.60924e-230	1.10345e-227	down
LOC_Os08g29570	1146.63	1862.11	431.143	-2.11093	7.36453e-229	1.22058e-226	down
LOC_Os03g26210	3651.51	2027.85	5275.18	1.37888	4.96195e-228	8.1642e-226	up
LOC_Os01g14440	1771.05	2749.77	792.323	-1.79539	1.93688e-227	3.16395e-225	down
LOC_Os08g45010	6844.15	4405.76	9282.55	1.07526	2.58807e-226	4.19748e-224	up
LOC_Os05g51160	1102.53	1805.95	399.113	-2.18296	3.23403e-226	5.20794e-224	down
LOC_Os06g51260	2214.77	1083.08	3346.46	1.62875	9.57215e-225	1.5306e-222	up
LOC_Os10g42690	2108.16	3209.48	1006.85	-1.67299	3.73109e-224	5.92434e-222	down
LOC_Os03g27080	2416.74	3583.08	1250.39	-1.51802	7.443e-224	1.17362e-221	down
LOC_Os02g45170	1264.21	2006.59	521.831	-1.94359	3.61374e-222	5.65887e-220	down
LOC_Os07g34520	1084.89	405.267	1764.51	2.12149	1.88553e-220	2.93239e-218	up
LOC_Os05g26820	2097.43	3192.62	1002.24	-1.67138	2.36472e-220	3.65261e-218	down
LOC_Os03g20380	8245.32	11764.2	4726.45	-1.31489	2.75791e-220	4.23116e-218	down
LOC_Os03g60580	1898.86	865.1	2932.62	1.76018	1.03896e-219	1.58327e-217	up
LOC_Os01g04630	3223.58	1789.75	4657.41	1.38031	1.16347e-219	1.76119e-217	up
LOC_Os05g41780	1880.73	2906.29	855.175	-1.76659	3.56683e-218	5.36348e-216	down
LOC_Os04g38410	5356.82	7492.93	3220.72	-1.21874	1.64244e-217	2.4535e-215	down
LOC_Os02g32610	4048.75	2348.6	5748.89	1.29083	1.27213e-215	1.8879e-213	up
LOC_Os10g26620	8071.29	11023.2	5119.4	-1.10588	5.61186e-215	8.27421e-213	down
LOC_Os04g48290	527.534	979.053	76.0149	-3.69546	1.46019e-210	2.13903e-208	down
LOC_Os01g59150	2803.36	4078.29	1528.43	-1.41572	1.94343e-210	2.82869e-208	down
LOC_Os03g31750	495.702	52.0908	939.312	4.1747	2.96994e-210	4.29526e-208	up
LOC_Os06g38210	13576.3	18391.4	8761.19	-1.06986	3.2331e-210	4.64625e-208	down
LOC_Os11g09010	1124.38	1800.05	448.712	-2.00449	3.47509e-209	4.9626e-207	down
LOC_Os03g60840	1389.36	601.878	2176.84	1.85473	1.01079e-208	1.43444e-206	up
LOC_Os10g06000	2619.28	3929.37	1309.19	-1.58662	1.95771e-208	2.76098e-206	down
LOC_Os04g54310	935.199	295.104	1575.29	2.41756	4.71282e-207	6.60551e-205	up
LOC_Os05g08370	11187.3	14929.3	7445.34	-1.00361	2.70451e-205	3.7674e-203	down
LOC_Os12g12580	4519.96	6321.72	2718.19	-1.21707	6.0132e-205	8.32534e-203	down
LOC_Os01g19820	666.578	170.733	1162.42	2.76635	7.89809e-204	1.08033e-201	up
LOC_Os08g03350	2763.29	3947.52	1579.06	-1.32191	1.22308e-203	1.66295e-201	down
LOC_Os04g55710	9501.5	13283.5	5719.45	-1.21624	1.45519e-203	1.96675e-201	down
LOC_Os06g08080	4502.02	6434.15	2569.89	-1.32448	1.51101e-202	2.03011e-200	down
LOC_Os03g10640	1097.99	1764.93	431.05	-2.02798	2.02306e-202	2.7021e-200	down
LOC_Os01g62300	4278.74	5999.12	2558.36	-1.2291	9.01503e-202	1.19705e-199	down
LOC_Os11g26790	6603.99	3840.38	9367.6	1.28662	1.05704e-201	1.39542e-199	up
LOC_Os01g34060	2169.39	1077.82	3260.96	1.59583	4.34044e-201	5.69676e-199	up
LOC_Os01g07370	2653.73	3808.71	1498.75	-1.34506	7.27642e-201	9.49531e-199	down
LOC_Os09g26960	2009.33	2994.87	1023.79	-1.54939	9.8208e-201	1.27423e-198	down
LOC_Os07g20340	792.27	1333.93	250.606	-2.4081	2.04184e-200	2.6342e-198	down
LOC_Os07g08710	2430.21	3532.51	1327.91	-1.41188	4.09125e-200	5.24835e-198	down
LOC_Os10g41100	1232.03	1972.98	491.079	-2.01199	7.15261e-199	9.07303e-197	down
LOC_Os01g64310	579.153	1029.69	128.613	-3.00615	1.96725e-198	2.48157e-196	down
LOC_Os07g08160	1153.91	1857.99	449.831	-2.05027	5.75335e-198	7.21744e-196	down
LOC_Os01g56330	896.31	1474.69	317.933	-2.21281	3.26631e-197	4.07499e-195	down
LOC_Os07g37620	1315.04	2058.62	571.453	-1.846	1.02416e-196	1.26384e-194	down
LOC_Os08g41990	6215.74	3896.7	8534.78	1.1313	2.49611e-196	3.0636e-194	up
LOC_Os08g26230	729.648	1232.17	227.125	-2.44517	5.55957e-195	6.78686e-193	down
LOC_Os03g63330	1166.31	471.684	1860.93	1.98189	6.84173e-194	8.30739e-192	up
LOC_Os02g36590	824.616	1355.65	293.58	-2.2047	6.92222e-194	8.36042e-192	down
LOC_Os02g55890	454.288	43.0625	865.514	4.32878	2.11777e-193	2.54424e-191	up
LOC_Os06g46740	1558.29	674.15	2442.43	1.8579	4.17531e-191	4.98971e-189	up
LOC_Os09g27050	3810.13	5384.04	2236.23	-1.2669	5.19327e-191	6.17374e-189	down
LOC_Os04g02900	3563.48	2182.73	4944.24	1.17929	1.03954e-190	1.22937e-188	up
LOC_Os01g17396	496.267	911.898	80.6356	-3.49177	3.07473e-190	3.61734e-188	down
LOC_Os02g56380	517.063	923.78	110.346	-3.07161	6.17457e-189	7.22679e-187	down
LOC_Os02g24080	2055.48	3025.63	1085.32	-1.47839	7.1468e-189	8.3218e-187	down
LOC_Os02g52010	477.583	870.152	85.0146	-3.36303	3.83555e-188	4.44337e-186	down
LOC_Os04g32920	1450.73	2207.55	693.916	-1.66845	5.49963e-187	6.33881e-185	down
LOC_Os08g13440	4619.81	6433.46	2806.16	-1.19802	9.38416e-187	1.07615e-184	down
LOC_Os08g01380	16562.7	22699.4	10426	-1.12292	5.2648e-186	6.00717e-184	down
LOC_Os01g03390	2554.07	1399.79	3708.34	1.40441	1.80733e-185	2.05187e-183	up
LOC_Os03g14915	714.355	1196.46	232.251	-2.3684	5.33948e-185	6.03176e-183	down
LOC_Os09g07350	1591.11	2384.06	798.175	-1.57747	1.6955e-183	1.89645e-181	down
LOC_Os03g40540	1702.14	2599.48	804.791	-1.68893	3.7989e-183	4.2077e-181	down
LOC_Os01g52110	8197.79	5319.85	11075.7	1.0577	8.80475e-183	9.70488e-181	up
LOC_Os09g25810	921.34	1495.8	346.876	-2.11212	5.16865e-182	5.66953e-180	down
LOC_Os02g43700	2003.91	2998.16	1009.67	-1.57098	3.94193e-181	4.30315e-179	down
LOC_Os01g58420	1431.2	2160.16	702.242	-1.62209	1.8333e-180	1.99172e-178	down
LOC_Os04g41960	1819.98	2791.44	848.522	-1.71561	4.00976e-180	4.3355e-178	down
LOC_Os02g21700	645.638	1093.25	198.028	-2.46742	5.61922e-180	6.04692e-178	down
LOC_Os07g37240	10359.7	14180.1	6539.2	-1.11718	4.05672e-179	4.3245e-177	down
LOC_Os11g15040	1400.47	698.674	2102.28	1.58897	1.51922e-178	1.61194e-176	up
LOC_Os01g13210	4647.08	6329.19	2964.97	-1.09364	1.01156e-177	1.0683e-175	down
LOC_Os04g25440	3689.82	2221.21	5158.44	1.21513	1.85831e-177	1.95346e-175	up
LOC_Os03g31690	2068.93	1040.91	3096.94	1.57456	5.94888e-177	6.22467e-175	up
LOC_Os03g07570	2409.25	3551.8	1266.7	-1.48606	1.23816e-176	1.28962e-174	down
LOC_Os03g02420	1708.98	902.085	2515.87	1.48047	4.1655e-176	4.31881e-174	up
LOC_Os02g04170	3113.19	4452.07	1774.31	-1.3256	5.59446e-176	5.77399e-174	down
LOC_Os10g31040	4704.17	6337.89	3070.44	-1.0455	9.26385e-176	9.51787e-174	down
LOC_Os01g32830	4899.27	6607.57	3190.98	-1.05049	1.24139e-175	1.26968e-173	down
LOC_Os06g48500	3300.6	1762.58	4838.61	1.45775	1.28795e-175	1.3114e-173	up
LOC_Os02g43330	529.131	120.613	937.649	2.96088	9.91635e-175	1.00518e-172	up
LOC_Os01g19150	5991.5	3986.47	7996.54	1.00409	1.07025e-174	1.08005e-172	up
LOC_Os04g52260	2108.35	3099.09	1117.61	-1.47424	8.64522e-174	8.68576e-172	down
LOC_Os09g34910	5112.75	3083.42	7142.08	1.21255	1.10408e-173	1.10437e-171	up
LOC_Os02g02380	817.286	1320.53	314.039	-2.07515	1.29445e-171	1.28911e-169	down
LOC_Os01g51540	1222.96	1918.54	527.373	-1.85815	1.56635e-170	1.54633e-168	down
LOC_Os08g38300	646.869	1082.49	211.248	-2.35585	8.59726e-170	8.45063e-168	down
LOC_Os05g02070	4347.36	6093.79	2600.93	-1.22882	9.93874e-170	9.72711e-168	down
LOC_Os05g50850	1481.53	654.051	2309	1.8213	1.09667e-169	1.06871e-167	up
LOC_Os03g03390	4163.58	2665.22	5661.95	1.08723	1.1711e-169	1.13637e-167	up
LOC_Os11g26780	920.926	351.048	1490.8	2.08626	2.24579e-169	2.16991e-167	up
LOC_Os01g12080	4306.46	2735.5	5877.43	1.10323	3.00999e-169	2.89596e-167	up
LOC_Os03g14590	3992.84	5396.53	2589.15	-1.05934	1.24698e-168	1.19468e-166	down
LOC_Os12g43450	663.349	214.692	1112.01	2.37457	2.68326e-168	2.55992e-166	up
LOC_Os07g07990	906.907	1439.68	374.138	-1.94715	3.82626e-168	3.63511e-166	down
LOC_Os03g56250	1468.19	2191.77	744.612	-1.55636	1.10036e-167	1.03671e-165	down
LOC_Os05g42040	1472.48	2233.64	711.317	-1.65006	4.48562e-167	4.2087e-165	down
LOC_Os03g12700	2537.43	3580.71	1494.15	-1.26186	9.55637e-167	8.9295e-165	down
LOC_Os02g55430	4987.72	6812.69	3162.75	-1.10594	1.03077e-166	9.59206e-165	down
LOC_Os07g35310	970.228	396.298	1544.16	1.96056	1.84288e-166	1.70794e-164	up
LOC_Os03g29980	1631.82	2432.44	831.193	-1.54616	2.51509e-166	2.32144e-164	down
LOC_Os12g38270	3210.63	1790.02	4631.24	1.37243	5.19816e-166	4.77852e-164	up
LOC_Os03g05620	1228.64	1858.62	598.661	-1.63521	1.82962e-164	1.66841e-162	down
LOC_Os04g42520	1696.89	898.793	2494.99	1.47205	3.81905e-164	3.4548e-162	up
LOC_Os11g32650	12425.4	17538.1	7312.68	-1.26246	5.18329e-164	4.65185e-162	down
LOC_Os02g47600	7210.85	9747.41	4674.29	-1.06136	1.19545e-163	1.06866e-161	down
LOC_Os05g29990	2851.29	4129.38	1573.19	-1.39297	1.50914e-163	1.34379e-161	down
LOC_Os11g12050	1420.74	2135.71	705.768	-1.59596	2.38177e-163	2.11252e-161	down
LOC_Os01g09430	2470.22	1390.71	3549.74	1.35109	1.75245e-161	1.54829e-159	up
LOC_Os07g14850	3043.6	4233.61	1853.58	-1.1914	2.32781e-161	2.04865e-159	down
LOC_Os03g19720	1391.52	2076.19	706.861	-1.55712	5.97933e-161	5.24196e-159	down
LOC_Os04g58390	1901.03	2758.44	1043.62	-1.40448	1.27093e-160	1.10992e-158	down
LOC_Os04g52614	1664.99	919.268	2410.71	1.39083	1.69215e-160	1.4721e-158	up
LOC_Os01g37920	3049.46	4247.01	1851.91	-1.19688	1.61913e-159	1.40321e-157	down
LOC_Os01g65690	2819.84	4043.57	1596.1	-1.34297	3.13979e-159	2.71073e-157	down
LOC_Os07g10840	3622.91	2096.14	5149.67	1.29714	4.08006e-159	3.50916e-157	up
LOC_Os04g46830	386.034	714.946	57.1222	-3.63661	7.85243e-159	6.7282e-157	down
LOC_Os05g01810	1268.42	1965.06	571.77	-1.77567	2.34296e-158	1.99998e-156	down
LOC_Os01g03690	611.739	1017.53	205.946	-2.30338	4.03423e-158	3.43076e-156	down
LOC_Os06g41360	2537.18	1559.46	3514.89	1.17275	3.53405e-157	2.99419e-155	up
LOC_Os03g50310	4026.3	5431.19	2621.41	-1.05066	3.88355e-157	3.27806e-155	down
LOC_Os06g36560	694.791	1140.77	248.813	-2.19562	5.0139e-157	4.2165e-155	down
LOC_Os02g13150	1533.66	2271.54	795.787	-1.51017	1.1388e-156	9.50645e-155	down
LOC_Os02g18410	480.84	835.398	126.281	-2.72528	3.56383e-156	2.96411e-154	down
LOC_Os02g13660	547.651	942.75	152.553	-2.61994	6.05256e-156	5.01567e-154	down
LOC_Os05g50380	2720.1	1638.28	3801.93	1.21504	7.87868e-156	6.50521e-154	up
LOC_Os03g09170	486.939	850.452	123.426	-2.79079	1.32572e-155	1.09065e-153	down
LOC_Os01g09770	1373.31	2040.7	705.916	-1.53119	1.38844e-154	1.13812e-152	down
LOC_Os01g68290	360.392	33.3235	687.46	4.36179	3.03515e-154	2.479e-152	up
LOC_Os07g32630	2295.75	3244.8	1346.7	-1.2671	4.94671e-154	4.02581e-152	down
LOC_Os01g61080	872.335	1376.67	368.001	-1.90623	6.9407e-154	5.62841e-152	down
LOC_Os02g45320	2136.69	3041.54	1231.83	-1.30153	2.21324e-153	1.7884e-151	down
LOC_Os07g37230	2907.09	4028.7	1785.48	-1.17556	1.78402e-152	1.43645e-150	down
LOC_Os03g58230	4924.06	6927.04	2921.08	-1.24482	5.46204e-152	4.38237e-150	down
LOC_Os02g04510	3300.77	4473.72	2127.82	-1.07152	7.62355e-152	6.09508e-150	down
LOC_Os01g04280	440.398	774.493	106.303	-2.85707	8.49738e-152	6.76988e-150	down
LOC_Os05g34980	958.736	1504.21	413.265	-1.86954	1.39173e-151	1.10491e-149	down
LOC_Os10g18340	1450.26	762.805	2137.71	1.48721	6.91159e-151	5.4681e-149	up
LOC_Os01g28500	2163.6	1223.57	3103.63	1.342	8.55335e-151	6.74349e-149	up
LOC_Os05g42060	1186.91	1772.08	601.742	-1.55713	2.16928e-150	1.70435e-148	down
LOC_Os03g56310	2528.08	3483.77	1572.4	-1.14808	2.36399e-150	1.85092e-148	down
LOC_Os03g12500	558.87	939.408	178.331	-2.39026	5.1037e-150	3.98229e-148	down
LOC_Os10g25130	3562.09	2320.91	4803.27	1.049	3.20171e-148	2.48116e-146	up
LOC_Os09g01960	1068.28	1654.66	481.903	-1.7795	4.0528e-148	3.13003e-146	down
LOC_Os10g05980	2296.5	3195.05	1397.96	-1.19352	6.13777e-148	4.72421e-146	down
LOC_Os08g30020	2573.82	3587.25	1560.4	-1.20248	1.3475e-147	1.03366e-145	down
LOC_Os02g54254	2518.2	1504.58	3531.82	1.23189	8.94708e-147	6.81719e-145	up
LOC_Os10g02070	855.018	351.977	1358.06	1.94655	9.04605e-147	6.86955e-145	up
LOC_Os06g49750	557.085	940.652	173.518	-2.42905	9.5601e-147	7.23572e-145	down
LOC_Os06g03970	1215.42	1848.26	582.576	-1.66068	9.77049e-147	7.37039e-145	down
LOC_Os04g27670	344.339	33.2308	655.447	4.30581	2.6326e-146	1.97934e-144	up
LOC_Os02g54510	3509.13	4757.65	2260.6	-1.07253	4.00403e-146	3.00051e-144	down
LOC_Os03g56930	357.16	654.701	59.6186	-3.46508	1.06835e-145	7.95344e-144	down
LOC_Os01g50940	577.868	964.606	191.131	-2.34487	2.02423e-145	1.50203e-143	down
LOC_Os01g21250	9248.32	12527.3	5969.3	-1.0686	9.35044e-145	6.87091e-143	down
LOC_Os09g29970	1973.09	1162.94	2783.24	1.25893	4.35371e-144	3.17863e-142	up
LOC_Os12g06780	774.761	1249.25	300.271	-2.06057	8.04606e-144	5.85557e-142	down
LOC_Os10g41930	1818.45	2625.42	1011.48	-1.37765	1.19054e-143	8.63656e-142	down
LOC_Os06g02380	14735.9	9593.3	19878.4	1.05118	1.28409e-143	9.28555e-142	up
LOC_Os01g72100	1658.89	2463.53	854.256	-1.52915	6.44945e-143	4.63422e-141	down
LOC_Os01g37050	1972.12	1149.56	2794.68	1.28163	7.42334e-143	5.31717e-141	up
LOC_Os11g43860	3772.08	5133.2	2410.95	-1.09047	1.01331e-142	7.23526e-141	down
LOC_Os11g05380	359.438	650.512	68.3645	-3.24788	1.42884e-142	1.01703e-140	down
LOC_Os07g48570	572.524	944.604	200.445	-2.23905	4.07614e-142	2.88327e-140	down
LOC_Os07g37320	2853.84	3920.26	1787.42	-1.13403	5.85599e-142	4.12938e-140	down
LOC_Os07g13234	3980.25	2425.61	5534.89	1.18993	1.88781e-141	1.32708e-139	up
LOC_Os04g05050	1506.16	2188.34	823.98	-1.41121	1.91837e-141	1.3444e-139	down
LOC_Os07g49270	2118.64	1255.05	2982.23	1.24839	3.32705e-141	2.31021e-139	up
LOC_Os06g03640	2870.78	3976.27	1765.28	-1.16961	4.18241e-141	2.8953e-139	down
LOC_Os07g48770	1685.13	2437.24	933.026	-1.38585	5.28591e-140	3.63703e-138	down
novel.473	682.069	239.945	1124.19	2.22559	5.40685e-140	3.709e-138	up
LOC_Os03g57840	2880.49	1815.82	3945.17	1.12033	9.74777e-140	6.66665e-138	up
LOC_Os07g07300	703.483	1138.21	268.757	-2.07938	1.21736e-139	8.3007e-138	down
LOC_Os03g60910	1833.75	1045.7	2621.8	1.32741	5.13792e-139	3.49286e-137	up
LOC_Os02g09810	1448.19	796.157	2100.23	1.39898	1.16128e-138	7.87104e-137	up
LOC_Os05g38530	827.373	358.346	1296.4	1.85418	1.71159e-138	1.15665e-136	up
LOC_Os10g40360	1042.8	1575.42	510.178	-1.62742	2.22493e-138	1.49909e-136	down
LOC_Os02g16000	2020.86	1206.32	2835.41	1.23389	2.25021e-138	1.51164e-136	up
LOC_Os03g58290	322.146	601.692	42.5999	-3.82126	6.33999e-138	4.24649e-136	down
LOC_Os03g19290	676.067	248.506	1103.63	2.15368	1.54263e-137	1.0302e-135	up
LOC_Os12g41390	3079.96	1984.62	4175.3	1.07315	1.701e-137	1.13264e-135	up
LOC_Os10g42190	1910.73	1106.1	2715.36	1.29682	3.08711e-137	2.04959e-135	up
LOC_Os03g18890	1672.94	2448.83	897.053	-1.44748	4.80527e-137	3.17176e-135	down
LOC_Os05g43040	482.76	153.412	812.109	2.40461	1.82821e-136	1.20322e-134	up
LOC_Os09g31300	2881.18	1756.64	4005.72	1.18905	1.23753e-135	8.1212e-134	up
LOC_Os04g51390	1085.34	512.106	1658.57	1.69351	1.85809e-135	1.21585e-133	up
novel.960	967.844	459.415	1476.27	1.68539	1.17885e-134	7.66962e-133	up
LOC_Os06g04030	6134.55	8327.25	3941.85	-1.08028	4.37906e-134	2.84088e-132	down
LOC_Os03g60080	4404.43	6133.78	2675.08	-1.19611	5.11013e-134	3.30572e-132	down
LOC_Os04g39320	316.863	589.259	44.4673	-3.7439	6.71455e-133	4.319e-131	down
LOC_Os05g03860	2699.71	3663.01	1736.41	-1.07812	6.92719e-133	4.44318e-131	down
LOC_Os10g36180	484.01	138.412	829.608	2.58283	1.34135e-132	8.57933e-131	up
LOC_Os02g15810	357.286	634.358	80.2135	-2.97936	3.33355e-131	2.12021e-129	down
LOC_Os04g43440	402.178	698.006	106.35	-2.71662	4.99984e-131	3.17113e-129	down
LOC_Os03g51350	451.399	135.045	767.754	2.50579	5.77477e-131	3.65242e-129	up
LOC_Os05g31750	1314.22	1899.73	728.722	-1.38131	1.17287e-130	7.37703e-129	down
LOC_Os07g49114	794.176	1249.92	338.428	-1.88708	2.0859e-130	1.30836e-128	down
LOC_Os06g34120	2199.41	3073.64	1325.19	-1.21233	5.33697e-130	3.33833e-128	down
LOC_Os01g66100	415.031	117.672	712.39	2.5978	9.56195e-130	5.94832e-128	up
LOC_Os02g30910	475.026	142.663	807.389	2.50229	1.16057e-129	7.2e-128	up
LOC_Os02g33680	423.454	739.214	107.694	-2.76888	3.25356e-129	2.01295e-127	down
LOC_Os01g12210	656.245	1038.33	274.154	-1.92158	3.59798e-129	2.21999e-127	down
LOC_Os02g50960	2638.12	3624.77	1651.47	-1.13379	5.07822e-129	3.12483e-127	down
LOC_Os04g57200	1261.7	1835.36	688.033	-1.41386	3.26214e-128	1.9965e-126	down
LOC_Os04g33110	2039.35	2945.8	1132.89	-1.38139	3.30218e-128	2.01557e-126	down
LOC_Os04g43200	817.258	374.565	1259.95	1.7511	3.84847e-128	2.33645e-126	up
LOC_Os09g23550	1140.28	610.47	1670.08	1.45188	5.33227e-128	3.22865e-126	up
LOC_Os03g04220	464.564	779.347	149.781	-2.3822	1.10164e-127	6.63495e-126	down
LOC_Os04g39880	1001.76	517.162	1486.36	1.52279	3.12594e-127	1.87276e-125	up
LOC_Os03g01830	3704.57	2367.25	5041.89	1.09158	4.06015e-127	2.42605e-125	up
LOC_Os09g10760	3261.38	2131.76	4391	1.04269	7.53943e-127	4.48142e-125	up
LOC_Os04g39150	2144.55	2998.48	1290.61	-1.21437	3.25724e-126	1.93104e-124	down
LOC_Os11g14300	1963.5	1167.49	2759.51	1.24126	5.39139e-126	3.18794e-124	up
LOC_Os02g14760	1828.46	1097.14	2559.77	1.22176	3.14375e-125	1.84928e-123	up
LOC_Os05g08420	1296.97	1902.45	691.494	-1.45936	3.82897e-125	2.24653e-123	down
LOC_Os08g34984	3725.61	2346.46	5104.76	1.12155	6.54906e-125	3.83255e-123	up
LOC_Os06g22919	427.892	117.363	738.421	2.65209	3.96649e-124	2.30931e-122	up
LOC_Os05g41220	934.123	467.739	1400.51	1.58171	6.28775e-124	3.6514e-122	up
LOC_Os07g33270	703.414	1107.12	299.707	-1.87868	1.23411e-123	7.1484e-122	down
LOC_Os05g46490	2382.05	1535.34	3228.77	1.07304	3.45174e-123	1.99428e-121	up
LOC_Os04g54640	1592.82	2288.12	897.528	-1.34848	5.07043e-123	2.92206e-121	down
LOC_Os05g47790	2086.85	2901.97	1271.74	-1.19148	5.66049e-123	3.25385e-121	down
LOC_Os05g02310	658.751	1038.08	279.419	-1.89441	8.20162e-123	4.70268e-121	down
LOC_Os02g47150	372.656	646.4	98.9125	-2.70217	1.83322e-122	1.04585e-120	down
LOC_Os01g62870	1217.29	1783.1	651.47	-1.45401	2.25113e-122	1.28106e-120	down
LOC_Os02g06430	3934.76	5350.29	2519.24	-1.08469	5.43751e-122	3.0866e-120	down
LOC_Os11g04020	410.488	125.844	695.133	2.46459	8.49632e-122	4.81091e-120	up
LOC_Os04g52090	867.859	1319.45	416.266	-1.66542	1.27921e-121	7.2074e-120	down
LOC_Os02g01100	1602.06	917.051	2287.07	1.31723	1.43036e-121	8.03906e-120	up
LOC_Os07g07290	509.052	837.198	180.907	-2.20892	2.282e-121	1.27623e-119	down
LOC_Os12g09300	551.186	888.388	213.984	-2.05307	2.78271e-121	1.55244e-119	down
LOC_Os03g16430	2975.59	1971.96	3979.23	1.01318	3.33839e-121	1.85788e-119	up
LOC_Os03g14010	543.404	881.962	204.845	-2.11345	7.67784e-121	4.25203e-119	down
LOC_Os01g37040	1118.52	1643.25	593.788	-1.46971	8.81266e-121	4.86862e-119	down
LOC_Os05g33080	1119	591.127	1646.88	1.47643	1.16537e-120	6.42254e-119	up
LOC_Os01g53920	332.627	586.45	78.8044	-2.89537	1.28036e-120	7.0392e-119	down
LOC_Os03g17870	2117.77	1308.43	2927.11	1.16183	1.73102e-120	9.49384e-119	up
LOC_Os03g53020	502.019	828.87	175.169	-2.24198	4.53338e-120	2.4744e-118	down
LOC_Os02g33070	1694.63	891.913	2497.36	1.4867	1.33468e-119	7.26744e-118	up
LOC_Os01g51670	361.405	633.806	89.0041	-2.84216	1.49738e-119	8.13384e-118	down
LOC_Os12g25690	1978.84	2729.99	1227.7	-1.15435	4.48019e-119	2.42208e-117	down
LOC_Os01g50910	338.655	77.8489	599.461	2.94586	5.2645e-119	2.83933e-117	up
LOC_Os10g35070	1694.58	1015.16	2374	1.22467	6.25385e-119	3.34906e-117	up
LOC_Os09g39650	416.019	700.56	131.477	-2.41424	9.05407e-118	4.81456e-116	down
LOC_Os08g30150	362.949	625.98	99.9183	-2.64904	1.26313e-117	6.70107e-116	down
LOC_Os05g41990	379.82	652.112	107.528	-2.60188	3.86547e-117	2.04115e-115	down
LOC_Os01g05060	2231.05	1374.65	3087.45	1.16607	1.31668e-116	6.93653e-115	up
LOC_Os04g41680	858.838	408.647	1309.03	1.67854	1.53407e-116	8.06308e-115	up
LOC_Os04g33390	1772.67	2501.89	1043.44	-1.2647	4.60521e-116	2.41492e-114	down
LOC_Os02g43280	2147.19	2937.34	1357.03	-1.11449	6.47449e-116	3.37954e-114	down
LOC_Os02g17330	1641.87	991.975	2291.77	1.20791	2.90751e-115	1.50726e-113	up
LOC_Os03g59180	1868.2	2613.09	1123.32	-1.21583	4.86718e-115	2.51741e-113	down
LOC_Os08g07970	1382.74	2032.8	732.686	-1.4701	6.56662e-115	3.38867e-113	down
LOC_Os06g02780	1991.14	2782.97	1199.32	-1.21546	1.21449e-114	6.2531e-113	down
LOC_Os05g25770	777.819	1189.6	366.038	-1.70328	1.67884e-114	8.61943e-113	down
LOC_Os02g37654	1492.13	2109.2	875.062	-1.26839	1.68167e-114	8.61943e-113	down
novel.118	469.804	798.092	141.516	-2.49246	4.34848e-114	2.22379e-112	down
LOC_Os03g55670	814.158	407.245	1221.07	1.58418	8.67354e-114	4.42565e-112	up
LOC_Os02g26800	999.604	526.423	1472.79	1.48541	1.71303e-113	8.7016e-112	up
LOC_Os12g28015	1239.52	636.42	1842.63	1.53393	3.59423e-113	1.81761e-111	up
LOC_Os02g11070	339.827	590.327	89.3265	-2.71452	1.28697e-112	6.49376e-111	down
LOC_Os11g02440	2668.97	3654.5	1683.45	-1.11958	1.88375e-112	9.48391e-111	down
LOC_Os01g31360	1126.71	1634.63	618.787	-1.40183	1.98777e-112	9.96344e-111	down
LOC_Os03g40830	2481.6	3319.32	1643.88	-1.01293	4.05561e-112	2.02834e-110	down
LOC_Os08g35160	901.922	471.414	1332.43	1.49817	1.09206e-111	5.44976e-110	up
LOC_Os01g08930	1921.68	1166.88	2676.47	1.19873	1.74999e-111	8.71385e-110	up
LOC_Os01g47780	1182.15	1688.52	675.776	-1.3211	2.07451e-111	1.02847e-109	down
LOC_Os03g55776	570.384	923.624	217.144	-2.08371	2.71388e-111	1.34251e-109	down
LOC_Os08g37920	1817.05	1139.55	2494.55	1.13037	1.19619e-110	5.90449e-109	up
LOC_Os01g09450	813.008	1216.79	409.225	-1.57337	2.43901e-110	1.2013e-108	down
LOC_Os11g01570	780.69	1194.12	367.263	-1.69503	3.89183e-110	1.91273e-108	down
LOC_Os03g19200	354.918	609.353	100.483	-2.59358	4.34e-110	2.12838e-108	down
LOC_Os04g08740	1595.27	943.807	2246.74	1.25096	8.16749e-110	3.99679e-108	up
LOC_Os05g46020	644.559	992.279	296.839	-1.74172	8.33501e-110	4.07e-108	down
LOC_Os01g66190	1765.05	2445.64	1084.46	-1.17202	1.90189e-109	9.26701e-108	down
LOC_Os02g39140	2022.27	1304.03	2740.51	1.07064	2.0816e-109	1.01209e-107	up
LOC_Os09g32760	2355.98	1562.39	3149.57	1.0115	3.58245e-109	1.7381e-107	up
LOC_Os12g24020	276.248	54.8974	497.599	3.17902	8.65539e-109	4.19039e-107	up
LOC_Os01g21590	367.002	109.605	624.399	2.51042	2.55721e-108	1.23017e-106	up
LOC_Os03g01880	523.183	834.119	212.248	-1.97512	7.19666e-108	3.4547e-106	down
LOC_Os10g35630	1333.67	1894.25	773.092	-1.29443	7.38513e-108	3.5377e-106	down
LOC_Os05g50340	496.925	805.357	188.493	-2.09655	2.64584e-107	1.26211e-105	down
LOC_Os01g17214	1417.36	1974.29	860.427	-1.19783	4.94406e-107	2.34853e-105	down
LOC_Os02g45940	325.125	564.048	86.2023	-2.70707	5.56806e-107	2.63943e-105	down
LOC_Os06g08670	2835.21	3828.23	1842.18	-1.05474	5.78773e-107	2.73784e-105	down
LOC_Os04g58280	1179.44	673.022	1685.85	1.32436	6.57813e-107	3.10526e-105	up
LOC_Os05g49140	2570.98	3461.27	1680.68	-1.04012	1.37083e-106	6.45769e-105	down
LOC_Os06g05550	1755.5	2406.35	1104.66	-1.12419	5.32489e-106	2.50325e-104	down
LOC_Os04g45090	983.02	1429.89	536.154	-1.41591	1.77152e-105	8.31077e-104	down
LOC_Os04g57400	2779.55	1849.67	3709.42	1.00418	2.4598e-105	1.15159e-103	up
LOC_Os07g39680	3069.29	4198.44	1940.14	-1.11536	9.98298e-105	4.66406e-103	down
LOC_Os09g39410	633.14	987.698	278.582	-1.81883	1.00416e-104	4.68183e-103	down
LOC_Os05g34270	1703.97	2318.95	1088.99	-1.0897	1.55971e-104	7.25714e-103	down
LOC_Os02g51750	1317.94	791.122	1844.76	1.2222	1.92463e-104	8.93672e-103	up
LOC_Os06g13100	1672.75	1002.02	2343.48	1.22507	7.40193e-104	3.40909e-102	up
LOC_Os01g72080	1662.93	2284.32	1041.54	-1.13378	7.94303e-104	3.6509e-102	down
LOC_Os06g10750	437.144	715.946	158.342	-2.17339	7.97014e-104	3.65596e-102	down
LOC_Os12g32986	2012.16	1254.23	2770.09	1.14468	2.0885e-103	9.56077e-102	up
LOC_Os06g13230	891.283	1369.56	413.009	-1.72223	4.03093e-103	1.83788e-101	down
LOC_Os08g42440	768.604	394.444	1142.76	1.5341	4.96576e-102	2.2416e-100	up
LOC_Os02g10730	640.046	977.17	302.921	-1.69056	7.78887e-102	3.50901e-100	down
LOC_Os02g28720	2362.7	3157.59	1567.81	-1.00889	3.49588e-101	1.57183e-99	down
LOC_Os03g14030	2424.76	3248.78	1600.74	-1.02055	4.13348e-101	1.85118e-99	down
LOC_Os03g13210	1411.89	804.991	2018.79	1.32479	5.44025e-101	2.43162e-99	up
LOC_Os03g15570	1727.18	2375.92	1078.44	-1.14143	1.15234e-100	5.12036e-99	down
LOC_Os05g49860	850.197	1241.97	458.428	-1.43754	1.40663e-100	6.23809e-99	down
LOC_Os05g36280	263.393	469.431	57.3554	-3.02936	1.44208e-100	6.38281e-99	down
LOC_Os09g12300	753.62	378.882	1128.36	1.57296	3.41989e-100	1.50488e-98	up
LOC_Os03g20680	800.048	1196.44	403.66	-1.56444	4.21993e-100	1.85334e-98	down
LOC_Os03g55590	1940.21	1238.36	2642.05	1.09439	7.45893e-100	3.26955e-98	up
LOC_Os02g37590	813.863	1202.75	424.977	-1.4999	9.83168e-100	4.30131e-98	down
LOC_Os07g36170	1423.94	1963.55	884.337	-1.1499	1.26982e-99	5.54474e-98	down
LOC_Os01g68680	1198.25	672.459	1724.05	1.36044	1.77377e-99	7.71557e-98	up
LOC_Os09g28210	538.76	851.922	225.599	-1.92014	5.86475e-99	2.54132e-97	down
LOC_Os03g12250	2042.38	2742.12	1342.65	-1.02997	6.28013e-99	2.71613e-97	down
LOC_Os05g12630	813.769	420.159	1207.38	1.52261	6.56269e-99	2.83294e-97	up
LOC_Os02g32814	1878.56	2612.82	1144.3	-1.19145	9.01088e-99	3.88237e-97	down
LOC_Os03g03520	258.741	468.421	49.0614	-3.25185	1.43446e-98	6.16873e-97	down
LOC_Os03g58330	1756.65	1097.15	2416.14	1.13844	1.86857e-98	8.00524e-97	up
LOC_Os03g50810	849.823	1255.6	444.044	-1.49451	3.1696e-98	1.35535e-96	down
LOC_Os09g37540	664.649	1026.6	302.699	-1.75957	5.858e-98	2.50022e-96	down
LOC_Os04g47190	1523.71	935.013	2112.41	1.17474	6.90377e-98	2.93552e-96	up
LOC_Os07g38120	1818.82	2461.03	1176.61	-1.06521	7.4336e-98	3.1549e-96	down
LOC_Os02g46970	1041.73	1484.73	598.724	-1.31059	8.17924e-98	3.45843e-96	down
LOC_Os11g02240	627.631	283.389	971.874	1.78057	1.0478e-97	4.42218e-96	up
LOC_Os10g40730	1577.96	2223.06	932.855	-1.25421	1.10641e-97	4.66086e-96	down
LOC_Os09g35880	1549.97	2142.88	957.061	-1.16522	1.27923e-97	5.37894e-96	down
LOC_Os01g61070	478.487	182.37	774.603	2.08469	1.35567e-97	5.68981e-96	up
LOC_Os04g39350	720.068	1115.08	325.056	-1.78787	1.38269e-97	5.79249e-96	down
LOC_Os02g10600	934.804	504.284	1365.32	1.43485	3.15541e-97	1.31704e-95	up
LOC_Os06g14450	361.376	598.342	124.41	-2.26881	3.76542e-97	1.56876e-95	down
LOC_Os11g11990	1548.41	2189.78	907.04	-1.27553	7.30365e-97	3.03175e-95	down
LOC_Os09g04050	750.159	1118.34	381.979	-1.54743	9.10455e-97	3.76554e-95	down
LOC_Os12g41124	1007.6	550.735	1464.46	1.41089	1.55355e-96	6.4136e-95	up
LOC_Os04g51460	241.813	436.885	46.741	-3.22943	1.8591e-96	7.6611e-95	down
LOC_Os08g37960	2098.43	1396.27	2800.6	1.00512	2.90152e-96	1.19351e-94	up
LOC_Os02g06930	466.604	740.668	192.541	-1.94518	3.77953e-96	1.55186e-94	down
novel.533	1785.09	1135.86	2434.32	1.09823	4.24835e-96	1.74121e-94	up
LOC_Os06g07820	1109	637.827	1580.17	1.3074	4.59151e-96	1.87847e-94	up
LOC_Os03g48780	411.276	152.285	670.268	2.13704	7.43208e-96	3.02425e-94	up
LOC_Os03g08310	330.548	560.517	100.58	-2.48359	7.5712e-96	3.07534e-94	down
LOC_Os11g10290	350.591	589.475	111.707	-2.40483	1.43408e-95	5.81468e-94	down
LOC_Os05g35290	1073.25	1566.01	580.499	-1.43147	1.99512e-95	8.07508e-94	down
LOC_Os03g10650	1847.36	2481.74	1212.97	-1.0328	1.38568e-94	5.58851e-93	down
LOC_Os07g12780	665.516	309.446	1021.59	1.71993	1.69874e-94	6.83894e-93	up
LOC_Os08g39430	1292.07	772.96	1811.18	1.22773	2.50037e-94	1.00484e-92	up
LOC_Os05g28630	1847.54	2493.82	1201.26	-1.05275	5.91857e-94	2.37014e-92	down
LOC_Os03g37830	2050.3	2737.05	1363.54	-1.00358	6.14738e-94	2.45744e-92	down
LOC_Os01g62430	266.713	523.618	9.8081	-5.67028	7.13975e-94	2.84912e-92	down
LOC_Os02g35180	1759.91	1105.75	2414.06	1.12508	1.05384e-93	4.19065e-92	up
LOC_Os11g47460	622.748	304.834	940.663	1.62465	1.4033e-93	5.5511e-92	up
LOC_Os07g44410	1693.44	1064.99	2321.88	1.1254	1.84408e-93	7.28203e-92	up
LOC_Os04g46970	542.157	840.553	243.762	-1.78737	1.92334e-93	7.58184e-92	down
LOC_Os03g63970	476.126	177.336	774.917	2.12935	2.08318e-93	8.1977e-92	up
LOC_Os05g04820	1378.59	1889.46	867.714	-1.12141	2.15453e-93	8.46378e-92	down
LOC_Os03g53710	755.573	361.704	1149.44	1.66561	2.87857e-93	1.12886e-91	up
LOC_Os06g01966	1808.19	1197.87	2418.5	1.01368	2.98811e-93	1.16979e-91	up
LOC_Os05g34700	365.541	604.414	126.669	-2.26443	4.19785e-93	1.63774e-91	down
LOC_Os01g60740	502.151	787.897	216.404	-1.86382	4.31271e-93	1.67966e-91	down
LOC_Os11g43990	816.57	1192.2	440.937	-1.43858	7.33856e-93	2.84837e-91	down
LOC_Os03g06720	2000.41	2708.28	1292.54	-1.06519	1.08985e-92	4.21569e-91	down
LOC_Os03g56420	1500.33	928.286	2072.38	1.15909	1.18571e-92	4.5787e-91	up
LOC_Os06g48300	595.173	281.698	908.647	1.68881	3.98492e-92	1.53099e-90	up
LOC_Os03g32314	1388.33	1915.83	860.831	-1.15714	5.68257e-92	2.17953e-90	down
LOC_Os02g54600	1493.53	2094.11	892.96	-1.23302	6.67649e-92	2.55643e-90	down
LOC_Os02g25060	2085.94	2857.61	1314.26	-1.12027	1.07457e-91	4.10759e-90	down
LOC_Os05g33630	1794.18	2452.97	1135.39	-1.11345	1.53989e-91	5.87641e-90	down
LOC_Os01g72290	571.214	884.766	257.661	-1.77614	2.94462e-91	1.12182e-89	down
LOC_Os05g46360	1466.74	2004.47	929.019	-1.10767	3.15866e-91	1.20135e-89	down
LOC_Os03g01320	276.588	478.251	74.9252	-2.66151	1.54419e-90	5.79542e-89	down
LOC_Os02g45520	1535.12	2085.11	985.138	-1.0818	1.93218e-90	7.2396e-89	down
LOC_Os06g38120	554.405	850.455	258.355	-1.71985	2.08991e-90	7.81772e-89	down
LOC_Os06g36390	330.925	107.012	554.838	2.37203	2.32819e-90	8.69473e-89	up
LOC_Os12g01560	743.214	1094.27	392.155	-1.47726	3.15687e-90	1.17701e-88	down
LOC_Os09g27820	603.626	914.865	292.387	-1.6472	8.10416e-90	3.01661e-88	down
LOC_Os01g64640	416.97	672.783	161.156	-2.06108	1.45829e-89	5.41929e-88	down
LOC_Os01g43020	1551.28	986.27	2116.28	1.10054	1.56806e-89	5.8177e-88	up
LOC_Os08g33160	1614.94	2172.95	1056.92	-1.03869	1.97738e-89	7.32439e-88	down
LOC_Os06g02900	578.657	888.177	269.138	-1.72637	4.65081e-89	1.71431e-87	down
LOC_Os01g10490	273.003	470.231	75.7745	-2.63785	6.5219e-89	2.4001e-87	down
LOC_Os01g58220	1936.7	2632.98	1240.42	-1.08614	9.74397e-89	3.56849e-87	down
LOC_Os06g04870	298.859	507.736	89.9824	-2.49817	1.03158e-88	3.77183e-87	down
LOC_Os03g40670	413.69	664.093	163.288	-2.02934	1.15324e-88	4.20987e-87	down
LOC_Os08g38210	797.749	1166.23	429.268	-1.43952	1.18731e-88	4.32728e-87	down
LOC_Os03g47050	545.409	251.97	838.849	1.73381	1.39389e-88	5.07208e-87	up
LOC_Os03g31706	1290.71	769.493	1811.93	1.2337	1.43908e-88	5.22811e-87	up
LOC_Os06g12310	2499.69	3478.81	1520.57	-1.19682	1.91492e-88	6.93464e-87	down
LOC_Os01g47070	360.812	590.36	131.264	-2.1782	1.97463e-88	7.13949e-87	down
LOC_Os05g02300	264.248	457.931	70.5643	-2.69893	2.71418e-88	9.78225e-87	down
LOC_Os09g20330	233.236	37.9716	428.5	3.49966	5.60847e-88	2.01178e-86	up
LOC_Os10g42960	1780.77	2398.41	1163.14	-1.04566	1.32176e-87	4.69669e-86	down
LOC_Os10g32540	1992.55	1280.2	2704.89	1.08017	2.81415e-87	9.98407e-86	up
LOC_Os08g43160	836.912	1218.59	455.233	-1.42462	4.47209e-87	1.58414e-85	down
LOC_Os05g18660	863.416	496.209	1230.62	1.3101	7.19244e-87	2.53196e-85	up
LOC_Os01g01870	1295.47	1795.95	794.993	-1.17238	1.11303e-86	3.90812e-85	down
LOC_Os03g23010	1659.32	2240.23	1078.42	-1.05442	4.89622e-86	1.6999e-84	down
LOC_Os05g39720	196.87	365.627	28.1126	-3.69393	5.71114e-86	1.97981e-84	down
LOC_Os07g28400	464.301	720.496	208.106	-1.79276	1.13568e-85	3.91303e-84	down
LOC_Os02g38120	717.753	1073.57	361.933	-1.56929	1.18974e-85	4.09306e-84	down
LOC_Os01g49890	1931.27	1275.11	2587.43	1.01952	1.28164e-85	4.40255e-84	up
LOC_Os02g54130	1857.29	1188.21	2526.38	1.08653	1.65185e-85	5.6657e-84	up
LOC_Os03g56840	1542	998.989	2085.01	1.06144	4.80223e-85	1.63477e-83	up
LOC_Os03g03724	662.81	1020.53	305.094	-1.73727	4.8631e-85	1.65302e-83	down
LOC_Os11g10510	215.644	39.6402	391.648	3.31263	8.45294e-85	2.86466e-83	up
LOC_Os01g52050	1809.44	2418.87	1200.02	-1.01012	9.6879e-85	3.27829e-83	down
LOC_Os10g36500	479.005	737.659	220.352	-1.74259	1.09423e-84	3.69177e-83	down
LOC_Os01g06500	414.83	173.138	656.523	1.92399	1.0983e-84	3.70001e-83	up
LOC_Os04g28520	803.62	1182.1	425.144	-1.47193	1.61124e-84	5.39598e-83	down
LOC_Os01g66110	1221.38	1692.88	749.873	-1.1719	2.44892e-84	8.17722e-83	down
LOC_Os01g59350	1470.63	967.704	1973.56	1.02785	4.83798e-84	1.60367e-82	up
LOC_Os09g35630	1238.11	1716.2	760.021	-1.17539	5.76025e-84	1.90659e-82	down
LOC_Os11g37970	896.646	519.813	1273.48	1.29217	1.08037e-83	3.57072e-82	up
LOC_Os11g32880	979.576	539.871	1419.28	1.39541	1.98467e-83	6.54997e-82	up
LOC_Os12g04220	1172.97	1620.33	725.599	-1.15919	2.3549e-83	7.74932e-82	down
LOC_Os01g65370	434.862	677.903	191.821	-1.82094	7.11162e-83	2.33011e-81	down
LOC_Os02g09359	1153.1	1583.41	722.793	-1.13193	7.27966e-83	2.38173e-81	down
LOC_Os01g09420	1079.14	660.227	1498.06	1.18317	7.85918e-83	2.56763e-81	up
LOC_Os08g03310	423.578	178.855	668.3	1.90264	8.08636e-83	2.63806e-81	up
LOC_Os03g14370	855.493	1239.89	471.099	-1.39739	9.22701e-83	3.00586e-81	down
LOC_Os03g14170	1329.07	1810.82	847.327	-1.09523	2.38687e-82	7.72028e-81	down
LOC_Os06g34070	680.186	361.435	998.938	1.46765	2.80936e-82	9.04813e-81	up
LOC_Os02g30320	1887.15	2600.13	1174.18	-1.14975	3.17433e-82	1.02091e-80	down
novel.879	709.873	381.674	1038.07	1.44369	4.18731e-82	1.3448e-80	up
LOC_Os08g09840	525.066	794.99	255.142	-1.63744	5.26473e-82	1.68605e-80	down
LOC_Os03g09930	600.488	898.287	302.689	-1.56595	7.50433e-82	2.39991e-80	down
LOC_Os04g39300	184.961	350.167	19.7553	-4.17826	8.30476e-82	2.64843e-80	down
LOC_Os10g40590	1462.39	1960.67	964.115	-1.02368	1.09168e-81	3.47653e-80	down
LOC_Os06g15370	1323.55	825.579	1821.51	1.1421	1.7692e-81	5.61055e-80	up
LOC_Os02g48870	570.646	863.938	277.354	-1.64127	1.98161e-81	6.27538e-80	down
LOC_Os03g13870	1390.86	1882.52	899.196	-1.06589	2.40604e-81	7.60887e-80	down
LOC_Os03g47940	343.278	557.88	128.675	-2.11584	2.95568e-81	9.33404e-80	down
LOC_Os06g44010	213.766	382.795	44.7361	-3.09299	4.3969e-81	1.38469e-79	down
LOC_Os07g04190	922.305	1297.08	547.533	-1.24261	6.80911e-81	2.13842e-79	down
LOC_Os08g44360	316.964	520.985	112.943	-2.20991	7.86274e-81	2.4659e-79	down
LOC_Os04g43910	787.518	1132.36	442.677	-1.35482	8.89123e-81	2.78461e-79	down
LOC_Os11g07911	223.217	53.239	393.195	2.88327	1.01203e-80	3.16516e-79	up
LOC_Os08g08586	1540.55	1009.56	2071.55	1.03818	2.20276e-80	6.87032e-79	up
LOC_Os11g30560	823.977	1174.01	473.944	-1.30811	2.30996e-80	7.19478e-79	down
LOC_Os05g08640	1224.29	1670.28	778.303	-1.1034	3.61842e-80	1.12394e-78	down
LOC_Os02g14160	580.241	862.519	297.962	-1.53416	3.92356e-80	1.21705e-78	down
LOC_Os09g28230	798.965	1152.76	445.174	-1.3713	4.00133e-80	1.23948e-78	down
novel.1038	939.105	527.918	1350.29	1.35366	5.04116e-80	1.55734e-78	up
LOC_Os01g09860	836.862	1228.1	445.625	-1.45625	5.87566e-80	1.81267e-78	down
LOC_Os09g31478	1485.55	947.063	2024.04	1.0967	2.37483e-79	7.26722e-78	up
LOC_Os08g40850	430.382	670.517	190.248	-1.81785	2.49368e-79	7.62065e-78	down
LOC_Os03g48310	738.586	409.736	1067.44	1.38165	4.90556e-79	1.4931e-77	up
LOC_Os01g01660	320.386	120.534	520.237	2.10918	5.10806e-79	1.55058e-77	up
LOC_Os04g43670	407.261	638.649	175.873	-1.85864	5.23021e-79	1.58554e-77	down
LOC_Os05g39060	932.63	1307.95	557.314	-1.23336	5.67005e-79	1.71439e-77	down
LOC_Os02g41680	921.95	1307.65	536.25	-1.28564	5.67032e-79	1.71439e-77	down
LOC_Os09g15480	725.671	1106.27	345.07	-1.67968	6.41232e-79	1.93615e-77	down
LOC_Os03g64170	529.734	796.258	263.209	-1.5985	6.49702e-79	1.95912e-77	down
LOC_Os08g42920	817.049	461.676	1172.42	1.34339	6.7118e-79	2.0212e-77	up
LOC_Os01g63050	1092.38	1539.84	644.928	-1.25454	8.18751e-79	2.45907e-77	down
LOC_Os03g17910	927.786	555.27	1300.3	1.22747	8.79004e-79	2.63655e-77	up
LOC_Os12g25200	736.617	390.133	1083.1	1.47019	1.16587e-78	3.48778e-77	up
LOC_Os06g06760	1000.9	1387.5	614.299	-1.17349	1.8243e-78	5.43602e-77	down
LOC_Os05g07810	226.892	57.2546	396.53	2.79268	1.95289e-78	5.81159e-77	up
LOC_Os01g59870	535.323	804.92	265.725	-1.60098	2.23407e-78	6.63095e-77	down
LOC_Os11g12330	443.069	681.992	204.147	-1.7427	3.06015e-78	9.05917e-77	down
LOC_Os01g62480	708.083	1047.43	368.734	-1.51396	3.89457e-78	1.14994e-76	down
LOC_Os06g51360	1437	1930.31	943.688	-1.03494	4.69717e-78	1.38332e-76	down
LOC_Os08g44840	460.464	713.773	207.155	-1.78484	6.1405e-78	1.80137e-76	down
LOC_Os03g53150	588.328	868.129	308.527	-1.49506	6.78364e-78	1.98748e-76	down
LOC_Os03g55090	830.454	474.291	1186.62	1.32536	1.18675e-77	3.46355e-76	up
LOC_Os01g65400	1002.69	593.019	1412.37	1.2535	1.44882e-77	4.22297e-76	up
LOC_Os01g25370	1420.49	941.109	1899.87	1.01409	1.99203e-77	5.76928e-76	up
LOC_Os03g59040	1224.29	1699.09	749.497	-1.18085	2.23836e-77	6.47441e-76	down
LOC_Os02g13870	1082.47	1487.29	677.661	-1.13243	2.26928e-77	6.55549e-76	down
LOC_Os11g26150	866.476	505.653	1227.3	1.27805	2.94782e-77	8.49407e-76	up
LOC_Os03g06940	742.241	1073.14	411.347	-1.38159	3.20851e-77	9.23351e-76	down
LOC_Os09g37710	932.399	1319.01	545.785	-1.27399	3.63688e-77	1.0453e-75	down
LOC_Os04g58860	680.39	989.766	371.014	-1.4126	3.73545e-77	1.07228e-75	down
LOC_Os03g08790	716.253	1031.94	400.569	-1.36765	4.71385e-77	1.35142e-75	down
LOC_Os03g11210	367.237	588.215	146.26	-1.99688	1.93325e-76	5.5077e-75	down
LOC_Os08g08690	230.596	399.032	62.1604	-2.69399	2.89021e-76	8.2134e-75	down
LOC_Os03g56220	822.413	1173.54	471.286	-1.31391	5.4115e-76	1.53209e-74	down
LOC_Os02g40040	1374.32	883.279	1865.37	1.07729	7.87155e-76	2.22579e-74	up
novel.967	250.372	73.3658	427.377	2.54235	1.01076e-75	2.85451e-74	up
LOC_Os05g43910	1136.38	1570.14	702.61	-1.15806	1.41337e-75	3.98163e-74	down
LOC_Os09g26780	491.604	747.957	235.25	-1.6732	1.7386e-75	4.87969e-74	down
LOC_Os03g49610	525.67	788.375	262.965	-1.58449	2.34661e-75	6.57803e-74	down
LOC_Os10g39740	332.294	537.085	127.502	-2.08029	2.48069e-75	6.94533e-74	down
LOC_Os06g45910	1433.37	932.486	1934.25	1.05272	2.63302e-75	7.35367e-74	up
LOC_Os03g61790	1073.79	663.303	1484.27	1.16369	3.44755e-75	9.59314e-74	up
LOC_Os01g15830	639.328	929.458	349.197	-1.41161	5.12722e-75	1.42321e-73	down
LOC_Os12g20390	4372.29	2912.45	5832.13	1.00092	2.78668e-74	7.68825e-73	up
LOC_Os12g35570	1385.96	919.416	1852.51	1.01151	3.41344e-74	9.39461e-73	up
LOC_Os09g36700	347.021	143.572	550.47	1.93963	4.27627e-74	1.17551e-72	up
LOC_Os04g09604	948.528	577.087	1319.97	1.19209	4.81508e-74	1.32043e-72	up
LOC_Os07g29330	795.444	465.734	1125.15	1.27347	5.06096e-74	1.38618e-72	up
LOC_Os07g40710	1081.61	690.384	1472.83	1.09325	1.59998e-73	4.35602e-72	up
LOC_Os06g48200	1709.95	2324.48	1095.41	-1.08776	1.89721e-73	5.15286e-72	down
LOC_Os03g45920	942.963	1318.1	567.823	-1.2154	2.60425e-73	7.05633e-72	down
LOC_Os01g43844	913.226	1268.11	558.345	-1.18453	2.9588e-73	7.99793e-72	down
LOC_Os01g36720	165.539	315.907	15.1717	-4.39761	3.73883e-73	1.00944e-71	down
LOC_Os03g05520	434.349	666.82	201.878	-1.72189	4.23858e-73	1.14165e-71	down
LOC_Os07g43170	1340.79	1788.72	892.866	-1.00263	5.70721e-73	1.5354e-71	down
LOC_Os07g06644	1724.6	1136.81	2312.39	1.02477	6.16398e-73	1.65632e-71	up
LOC_Os09g28000	1154.89	1562.88	746.901	-1.0657	6.87933e-73	1.84636e-71	down
LOC_Os10g28120	318.735	116.39	521.079	2.15797	9.47895e-73	2.53211e-71	up
LOC_Os04g57410	1252.65	757.83	1747.47	1.20488	1.40659e-72	3.75301e-71	up
LOC_Os01g66010	206.255	358.977	53.5338	-2.74538	1.42351e-72	3.79368e-71	down
LOC_Os01g61990	957.58	1335.24	579.921	-1.20164	1.52667e-72	4.05908e-71	down
LOC_Os05g39350	935.419	1330.83	540.008	-1.2995	1.74283e-72	4.62838e-71	down
LOC_Os12g31860	244.624	78.2117	411.037	2.39379	2.11341e-72	5.60596e-71	up
LOC_Os10g36390	363.099	576.587	149.612	-1.94252	2.54497e-72	6.73499e-71	down
LOC_Os12g40890	909.556	1264.65	554.459	-1.1891	3.06101e-72	8.08177e-71	down
LOC_Os01g62060	508.058	758.263	257.852	-1.55212	3.61881e-72	9.5434e-71	down
LOC_Os02g53790	778.29	1104.85	451.728	-1.28908	5.65227e-72	1.48887e-70	down
LOC_Os07g38170	1628.27	2180.04	1076.5	-1.01526	7.36302e-72	1.93725e-70	down
LOC_Os05g10754	446.43	206.017	686.843	1.73645	1.14765e-71	3.0056e-70	up
LOC_Os06g51070	282.598	464.039	101.156	-2.20192	1.17867e-71	3.08327e-70	down
LOC_Os02g36550	677.583	976.731	378.434	-1.36873	1.44184e-71	3.76304e-70	down
LOC_Os04g03810	230.901	391.817	69.9843	-2.48689	1.4883e-71	3.87539e-70	down
LOC_Os03g55800	590.743	877.169	304.317	-1.53183	2.30818e-71	6.00339e-70	down
LOC_Os01g64470	410.438	632.277	188.598	-1.74096	3.26485e-71	8.48189e-70	down
LOC_Os01g63930	290.093	470.432	109.753	-2.10281	3.4453e-71	8.93026e-70	down
LOC_Os01g32770	725.17	407.499	1042.84	1.35633	4.31878e-71	1.11816e-69	up
LOC_Os06g46950	233.802	397.661	69.9432	-2.4993	5.63473e-71	1.45554e-69	down
LOC_Os04g21950	1415.88	1908.98	922.777	-1.0497	6.60304e-71	1.70373e-69	down
LOC_Os12g05230	783.943	463.734	1104.15	1.25166	1.16732e-70	3.00512e-69	up
LOC_Os01g52230	764.805	1119.74	409.874	-1.4554	1.40904e-70	3.61103e-69	down
LOC_Os01g61010	778.393	1118.69	438.092	-1.35719	2.19861e-70	5.61548e-69	down
LOC_Os06g18000	548.787	811.251	286.324	-1.50806	2.61828e-70	6.66487e-69	down
LOC_Os03g06570	501.757	746.76	256.753	-1.54004	4.14765e-70	1.05225e-68	down
LOC_Os01g21034	569.184	834.323	304.044	-1.45215	5.95567e-70	1.50926e-68	down
LOC_Os06g20370	554.915	814.547	295.283	-1.46469	7.75753e-70	1.95714e-68	down
LOC_Os01g40070	1175.06	1580.48	769.643	-1.04025	8.03363e-70	2.02455e-68	down
LOC_Os06g11210	171.438	310.41	32.4665	-3.253	9.09758e-70	2.29013e-68	down
LOC_Os01g66680	339.177	142.736	535.619	1.90653	1.07506e-69	2.70025e-68	up
LOC_Os01g53100	219.299	62.8463	375.751	2.58032	1.21982e-69	3.05708e-68	up
LOC_Os04g02530	276.826	455.553	98.0981	-2.22233	1.36906e-69	3.42732e-68	down
LOC_Os12g23780	1178.26	774.898	1581.62	1.02924	1.47303e-69	3.67949e-68	up
LOC_Os01g11550	377.114	590.541	163.687	-1.85686	1.65652e-69	4.13328e-68	down
LOC_Os07g42714	1339.03	1856.16	821.897	-1.17659	2.05873e-69	5.1256e-68	down
LOC_Os01g70790	1038.39	1446.11	630.669	-1.20213	2.22717e-69	5.5389e-68	down
LOC_Os07g02200	461.086	705.585	216.587	-1.70477	2.235e-69	5.55228e-68	down
LOC_Os06g50080	781.868	463.913	1099.82	1.24516	5.16178e-69	1.27395e-67	up
LOC_Os05g09704	1377.96	1837.11	918.8	-1.00207	5.53676e-69	1.36501e-67	down
LOC_Os04g41540	652.447	935.249	369.646	-1.33831	7.64347e-69	1.88235e-67	down
LOC_Os01g03340	356.739	155.807	557.67	1.83856	4.7803e-68	1.16087e-66	up
LOC_Os07g12800	630.326	337.339	923.313	1.45002	6.6429e-68	1.60975e-66	up
LOC_Os04g27430	151.778	15.4937	288.062	4.20976	6.65191e-68	1.61022e-66	up
LOC_Os04g44850	663.557	949.136	377.978	-1.32597	7.30644e-68	1.76489e-66	down
LOC_Os06g46900	329.917	133.617	526.217	1.9737	8.301e-68	2.003e-66	up
LOC_Os03g60920	1097.46	670.433	1524.49	1.18676	8.80811e-68	2.12311e-66	up
LOC_Os01g27360	463.876	703.175	224.576	-1.64601	1.2243e-67	2.94792e-66	down
LOC_Os03g60260	679.812	378.617	981.008	1.37123	1.23979e-67	2.98206e-66	up
LOC_Os03g02780	259.112	428.89	89.3354	-2.2733	1.28861e-67	3.0962e-66	down
LOC_Os05g46830	231.05	389.067	73.0328	-2.40684	3.57316e-67	8.53125e-66	down
LOC_Os08g39840	296.376	476.711	116.042	-2.04623	4.45559e-67	1.06158e-65	down
LOC_Os01g31010	639.954	333.232	946.677	1.50441	5.59264e-67	1.3311e-65	up
LOC_Os06g15910	836.783	1164.59	508.977	-1.1953	6.32403e-67	1.5036e-65	down
LOC_Os03g21664	1297.59	862.514	1732.67	1.00686	6.79047e-67	1.61281e-65	up
LOC_Os09g23084	675.301	961.716	388.886	-1.30461	6.96641e-67	1.65287e-65	down
LOC_Os11g17970	464.947	692.724	237.17	-1.549	1.70789e-66	4.02693e-65	down
LOC_Os03g40930	336.049	531.195	140.904	-1.91203	2.12908e-66	5.01482e-65	down
LOC_Os03g55164	936.967	569.695	1304.24	1.19309	3.30035e-66	7.7335e-65	up
LOC_Os05g47730	173.518	33.6781	313.358	3.21634	3.41141e-66	7.97728e-65	up
LOC_Os08g43320	835.721	1166.83	504.61	-1.21153	3.54537e-66	8.2735e-65	down
LOC_Os05g07940	590.99	331.841	850.138	1.35708	3.97659e-66	9.26569e-65	up
LOC_Os03g15960	451.656	209.829	693.483	1.72218	3.97871e-66	9.26569e-65	up
LOC_Os08g43440	901.527	568.78	1234.27	1.11658	9.24131e-66	2.14115e-64	up
LOC_Os10g37760	193.298	333.502	53.0937	-2.65568	1.20443e-65	2.78491e-64	down
LOC_Os01g49670	1235.36	819.864	1650.85	1.00932	1.44193e-65	3.32729e-64	up
LOC_Os02g28074	808.757	501.375	1116.14	1.15473	3.49161e-65	8.00814e-64	up
LOC_Os02g55560	532.185	784.28	280.09	-1.47896	4.12578e-65	9.44963e-64	down
LOC_Os06g06510	163.813	293.388	34.2379	-3.09831	4.12844e-65	9.44963e-64	down
LOC_Os01g60420	631.603	906.861	356.346	-1.34441	4.54302e-65	1.03881e-63	down
LOC_Os11g38650	983.183	1351.57	614.793	-1.13315	4.77679e-65	1.09116e-63	down
LOC_Os02g56900	813.931	1122.49	505.376	-1.15052	5.18035e-65	1.18097e-63	down
LOC_Os02g58214	542.347	797.825	286.869	-1.4808	6.75946e-65	1.53634e-63	down
LOC_Os08g04450	947.15	600.207	1294.09	1.10835	1.09783e-64	2.48527e-63	up
LOC_Os02g07830	516.748	769.35	264.146	-1.53944	1.20314e-64	2.71556e-63	down
LOC_Os04g58734	376.942	585.037	168.846	-1.80114	1.28039e-64	2.88704e-63	down
LOC_Os06g02019	325.429	128.915	521.942	2.01562	1.81853e-64	4.09233e-63	up
LOC_Os08g26220	227.74	380.483	74.9959	-2.3501	2.17792e-64	4.8769e-63	down
LOC_Os04g43390	950.189	605.474	1294.9	1.09574	2.42263e-64	5.4142e-63	up
LOC_Os04g51190	511.833	747.671	275.996	-1.44071	2.46216e-64	5.49712e-63	down
LOC_Os03g24560	576.146	299.637	852.656	1.50678	5.54695e-64	1.23117e-62	up
LOC_Os05g08750	434.007	210.828	657.186	1.64098	6.05663e-64	1.34299e-62	up
LOC_Os06g10230	518.937	765.883	271.991	-1.49291	8.48058e-64	1.8768e-62	down
LOC_Os01g68740	165.042	293.023	37.0608	-2.98781	8.75343e-64	1.9353e-62	down
LOC_Os04g33640	554.766	803.71	305.823	-1.39545	1.17114e-63	2.58424e-62	down
LOC_Os07g28850	521.434	766.223	276.646	-1.46747	1.25011e-63	2.75582e-62	down
LOC_Os03g07100	151.549	278.633	24.4644	-3.50289	1.74654e-63	3.84273e-62	down
LOC_Os03g51610	583.104	328.778	837.43	1.34937	2.45673e-63	5.38441e-62	up
LOC_Os05g47700	469.072	230.217	707.927	1.61738	3.01533e-63	6.59596e-62	up
LOC_Os06g20200	572.029	304.024	840.033	1.4642	3.21089e-63	7.01698e-62	up
LOC_Os02g50374	162.27	316.189	8.35134	-5.24926	4.28171e-63	9.33914e-62	down
LOC_Os03g04240	273.483	440.966	106	-2.06172	4.61448e-63	1.00553e-61	down
LOC_Os02g58150	1081.63	715.14	1448.11	1.01796	5.78235e-63	1.2552e-61	up
LOC_Os03g10030	1063.8	1433.75	693.844	-1.04523	5.87956e-63	1.27508e-61	down
LOC_Os10g38740	658.818	376.939	940.696	1.31757	6.72914e-63	1.45655e-61	up
LOC_Os04g35620	634.761	365.873	903.649	1.30276	7.57567e-63	1.63666e-61	up
LOC_Os07g43925	927.389	1274.46	580.32	-1.13715	7.9551e-63	1.717e-61	down
LOC_Os07g46510	275.275	453.386	97.1635	-2.21384	1.50199e-62	3.23569e-61	down
LOC_Os07g42730	588.326	844.797	331.856	-1.35055	1.53341e-62	3.30024e-61	down
LOC_Os05g37730	886.817	1208.35	565.288	-1.09395	1.8297e-62	3.9342e-61	down
LOC_Os08g40510	1247.74	802.034	1693.44	1.07667	1.92414e-62	4.13335e-61	up
LOC_Os11g26570	1102.87	710.816	1494.93	1.07058	2.2942e-62	4.91898e-61	up
LOC_Os02g41780	478.661	705.226	252.096	-1.48846	2.35627e-62	5.04732e-61	down
LOC_Os12g40900	398.931	600.337	197.525	-1.60516	3.36198e-62	7.18129e-61	down
LOC_Os05g34854	844.347	500.675	1188.02	1.24623	4.28463e-62	9.13491e-61	up
LOC_Os12g03260	556.373	800.643	312.103	-1.35833	4.62632e-62	9.85414e-61	down
LOC_Os08g02110	860.049	545.53	1174.57	1.10586	7.49409e-62	1.59178e-60	up
LOC_Os12g37610	718.215	436.055	1000.37	1.19864	1.35398e-61	2.86787e-60	up
LOC_Os03g04070	237.567	392.901	82.2338	-2.26607	1.63766e-61	3.46226e-60	down
LOC_Os11g10460	639.338	915.067	363.608	-1.3313	2.15149e-61	4.54012e-60	down
LOC_Os02g56920	829.71	1160.1	499.316	-1.21434	3.04503e-61	6.39005e-60	down
LOC_Os04g44500	297.203	466.863	127.543	-1.87565	3.46255e-61	7.25952e-60	down
LOC_Os02g27480	808.148	1126.24	490.055	-1.1959	3.78415e-61	7.91916e-60	down
LOC_Os04g37430	632.561	906.117	359.005	-1.33666	6.44196e-61	1.34216e-59	down
LOC_Os12g40180	142.217	23.5393	260.895	3.47144	6.5314e-61	1.35932e-59	up
LOC_Os03g02040	1109.06	1514.95	703.171	-1.10413	8.01454e-61	1.66647e-59	down
LOC_Os03g51530	813.587	460.622	1166.55	1.34291	9.40398e-61	1.9518e-59	up
LOC_Os03g57460	953.655	1285.15	622.161	-1.04835	1.20815e-60	2.50524e-59	down
LOC_Os02g54640	318.919	501.242	136.596	-1.86622	1.24859e-60	2.58673e-59	down
LOC_Os05g44200	356.248	545.845	166.651	-1.71359	1.25046e-60	2.58824e-59	down
LOC_Os05g08900	208.93	350.735	67.1244	-2.39016	1.38714e-60	2.86853e-59	down
LOC_Os01g09220	215.301	360.138	70.4638	-2.35338	2.4037e-60	4.95716e-59	down
LOC_Os12g02810	741.278	1026.53	456.028	-1.17268	3.60355e-60	7.39135e-59	down
LOC_Os12g41715	1222.15	813.615	1630.68	1.005	4.75659e-60	9.74757e-59	up
LOC_Os01g46400	583.359	843.44	323.277	-1.3904	4.81322e-60	9.85472e-59	down
LOC_Os03g50030	662.452	944.781	380.123	-1.31217	6.27286e-60	1.28201e-58	down
LOC_Os03g61740	372.01	566.551	177.468	-1.6728	6.47064e-60	1.32124e-58	down
LOC_Os10g34350	747.303	458.859	1035.75	1.17316	7.2695e-60	1.4817e-58	up
LOC_Os01g70130	674.385	942.33	406.44	-1.21639	9.42495e-60	1.91416e-58	down
LOC_Os12g04360	326.524	507.923	145.126	-1.81419	1.01229e-59	2.05407e-58	down
LOC_Os03g61280	615.033	869.494	360.571	-1.2687	1.13462e-59	2.29409e-58	down
LOC_Os10g40520	228.497	374.153	82.8401	-2.17995	1.38035e-59	2.78846e-58	down
LOC_Os02g51950	337.845	521.086	154.603	-1.75715	1.48355e-59	2.99426e-58	down
LOC_Os09g31486	866.59	557.87	1175.31	1.07515	1.7521e-59	3.53001e-58	up
LOC_Os03g19120	292.34	459.618	125.061	-1.88314	1.84865e-59	3.72123e-58	down
LOC_Os01g12560	882.291	567.821	1196.76	1.07424	2.48671e-59	4.98352e-58	up
LOC_Os01g25540	712.819	988.801	436.836	-1.18143	2.74543e-59	5.49715e-58	down
LOC_Os01g63220	823.669	525.422	1121.92	1.0955	3.05474e-59	6.1111e-58	up
LOC_Os05g31020	439.455	228.132	650.777	1.51379	6.2985e-59	1.25012e-57	up
LOC_Os08g28790	584.236	841.511	326.961	-1.35971	9.04405e-59	1.79349e-57	down
LOC_Os02g12890	685.079	950.927	419.23	-1.18001	9.81465e-59	1.9446e-57	down
LOC_Os03g63490	679.518	384.758	974.278	1.34001	2.78694e-58	5.48832e-57	up
LOC_Os05g29710	406.078	187.659	624.497	1.73263	4.48203e-58	8.79593e-57	up
LOC_Os05g48360	943.634	1278.99	608.275	-1.07289	4.68189e-58	9.1723e-57	down
LOC_Os12g01590	830.755	527.078	1134.43	1.10563	5.31581e-58	1.03963e-56	up
LOC_Os02g44320	1067.97	1436.74	699.203	-1.04232	5.7666e-58	1.12585e-56	down
LOC_Os01g12650	602.942	877.378	328.507	-1.41474	6.05173e-58	1.1805e-56	down
LOC_Os03g15890	1206.44	776.208	1636.68	1.07362	6.46022e-58	1.25911e-56	up
LOC_Os05g41110	1512.31	994.208	2030.42	1.0308	7.04855e-58	1.37259e-56	up
LOC_Os02g40664	788.039	1077.35	498.725	-1.10881	7.40881e-58	1.44151e-56	down
LOC_Os12g12260	645.822	915.506	376.138	-1.28269	1.10495e-57	2.14435e-56	down
LOC_Os01g37590	328.749	504.82	152.677	-1.72187	1.34741e-57	2.61044e-56	down
LOC_Os02g51860	718.304	996.773	439.835	-1.17789	1.4658e-57	2.83739e-56	down
LOC_Os06g12660	790.065	496.556	1083.57	1.12636	1.54991e-57	2.99509e-56	up
LOC_Os09g35010	193.555	327.629	59.4819	-2.44974	1.75364e-57	3.38014e-56	down
LOC_Os06g46149	630.015	884.276	375.755	-1.23738	1.96621e-57	3.78666e-56	down
LOC_Os12g16690	780.447	485.219	1075.68	1.14868	3.66085e-57	7.03243e-56	up
LOC_Os07g07715	669.256	935.846	402.666	-1.22001	4.5181e-57	8.66453e-56	down
LOC_Os04g33610	865.137	1185.1	545.174	-1.11834	4.98806e-57	9.54965e-56	down
LOC_Os02g33820	953.381	1289.13	617.632	-1.06207	5.13633e-57	9.81696e-56	down
LOC_Os01g60850	221.489	81.8241	361.154	2.14287	6.70711e-57	1.27761e-55	up
LOC_Os02g38970	400.936	595.902	205.969	-1.5306	7.82662e-57	1.48962e-55	down
LOC_Os02g47510	725.916	451.032	1000.8	1.1503	8.41984e-57	1.60118e-55	up
LOC_Os02g51910	223.648	80.8946	366.4	2.17764	9.88089e-57	1.87745e-55	up
LOC_Os01g67810	444.432	651.39	237.475	-1.45608	1.3146e-56	2.49159e-55	down
LOC_Os01g41420	147.559	288.059	7.05835	-5.36545	1.37778e-56	2.60916e-55	down
LOC_Os01g50370	482.864	706.049	259.68	-1.43817	1.43127e-56	2.70821e-55	down
LOC_Os06g04210	411.923	608.346	215.5	-1.49716	1.44079e-56	2.72395e-55	down
LOC_Os12g42280	137.04	249.222	24.8579	-3.30635	1.85783e-56	3.50655e-55	down
LOC_Os05g37250	301.365	466.129	136.6	-1.76792	1.9909e-56	3.7546e-55	down
LOC_Os02g44820	892.222	521.087	1263.36	1.2794	2.48955e-56	4.6872e-55	up
LOC_Os11g18730	745.25	1019.71	470.787	-1.11391	3.79623e-56	7.14144e-55	down
LOC_Os01g42960	405.845	599.331	212.358	-1.49453	5.62303e-56	1.05605e-54	down
LOC_Os10g26940	134.126	8.21471	260.037	4.97133	6.74735e-56	1.26511e-54	up
LOC_Os07g04150	340.593	520.553	160.632	-1.69283	7.08358e-56	1.32597e-54	down
novel.322	694.018	378.965	1009.07	1.41527	8.29615e-56	1.54911e-54	up
LOC_Os02g19770	616.73	876.997	356.463	-1.2973	1.09731e-55	2.04393e-54	down
LOC_Os03g29190	490.011	708.565	271.457	-1.3819	1.14293e-55	2.12541e-54	down
LOC_Os10g40710	209.522	347.432	71.613	-2.27605	1.51923e-55	2.82057e-54	down
LOC_Os03g31510	218.941	359.296	78.5867	-2.19764	1.57595e-55	2.9235e-54	down
LOC_Os01g61920	763.278	1045.03	481.522	-1.11719	1.60933e-55	2.98298e-54	down
LOC_Os01g01890	149.305	264.371	34.2389	-2.93766	1.65296e-55	3.06135e-54	down
LOC_Os03g03164	1007.22	1353.1	661.336	-1.03293	1.80365e-55	3.33228e-54	down
LOC_Os10g40600	574.764	817.514	332.014	-1.29947	1.80697e-55	3.3357e-54	down
LOC_Os03g42020	569.534	327.053	812.015	1.31202	2.03843e-55	3.75382e-54	up
LOC_Os10g23050	177.779	54.1135	301.445	2.47819	2.74747e-55	5.05133e-54	up
LOC_Os05g10310	961.612	639.376	1283.85	1.00463	2.89924e-55	5.32175e-54	up
LOC_Os03g18820	969.956	1296.9	643.01	-1.00924	4.20492e-55	7.70596e-54	down
LOC_Os04g51560	865.269	1178.38	552.163	-1.09735	5.6493e-55	1.03113e-53	down
LOC_Os03g16824	835.398	1132.43	538.362	-1.07081	7.34715e-55	1.33888e-53	down
LOC_Os05g32170	540.208	769.881	310.535	-1.30993	9.49223e-55	1.72563e-53	down
LOC_Os01g47730	634.699	892.443	376.954	-1.24012	1.47508e-54	2.67517e-53	down
LOC_Os06g06460	149.245	261.806	36.6839	-2.82806	1.80092e-54	3.25571e-53	down
LOC_Os11g14130	579.876	345.311	814.44	1.23662	2.28167e-54	4.11826e-53	up
LOC_Os02g07690	748.507	1019.93	477.082	-1.09658	2.5756e-54	4.64509e-53	down
LOC_Os03g17700	821.419	1115.81	527.023	-1.08064	3.17927e-54	5.72471e-53	down
LOC_Os08g09270	882.239	574.656	1189.82	1.05209	4.4375e-54	7.97766e-53	up
LOC_Os04g52250	1134.79	1539.3	730.29	-1.07455	4.51231e-54	8.10574e-53	down
LOC_Os05g06340	617.518	362.352	872.684	1.26768	5.20055e-54	9.32731e-53	up
LOC_Os12g31540	180.649	304.758	56.5395	-2.41828	5.5088e-54	9.86458e-53	down
LOC_Os06g12280	348.909	525.248	172.57	-1.60889	6.39499e-54	1.14244e-52	down
LOC_Os08g26820	363.642	544.901	182.383	-1.57823	1.03964e-53	1.85146e-52	down
LOC_Os09g04290	1008.13	659.615	1356.64	1.03893	1.27701e-53	2.27062e-52	up
LOC_Os02g57050	1089.17	717.823	1460.53	1.02617	1.39805e-53	2.48389e-52	up
LOC_Os02g49720	484.355	275.033	693.677	1.33394	2.02432e-53	3.58255e-52	up
LOC_Os06g50950	308.959	474.031	143.887	-1.71554	2.06374e-53	3.64948e-52	down
LOC_Os07g24230	690.63	425.003	956.257	1.17225	2.59809e-53	4.58727e-52	up
LOC_Os08g29200	374.046	554.879	193.213	-1.52466	2.63776e-53	4.65369e-52	down
LOC_Os02g45450	181.273	358.228	4.31799	-6.37323	4.3927e-53	7.72584e-52	down
LOC_Os02g50820	321.695	488.539	154.85	-1.65664	4.70084e-53	8.26141e-52	down
LOC_Os07g05190	215.053	348.38	81.7265	-2.08636	5.17706e-53	9.07724e-52	down
LOC_Os07g01370	624.564	864.508	384.62	-1.16753	6.74624e-53	1.18012e-51	down
LOC_Os02g43170	577.52	807.562	347.478	-1.21906	8.98265e-53	1.56651e-51	down
LOC_Os04g54200	340.68	518.669	162.691	-1.67047	1.25044e-52	2.17567e-51	down
LOC_Os04g51280	1366.54	869.077	1864	1.10082	1.25726e-52	2.18586e-51	up
LOC_Os12g06190	353.821	530.216	177.426	-1.58058	2.03349e-52	3.51656e-51	down
LOC_Os02g58720	754.14	1038.26	470.025	-1.14274	2.24344e-52	3.87669e-51	down
LOC_Os06g03670	201.308	329.219	73.3968	-2.17308	2.80777e-52	4.84448e-51	down
LOC_Os02g02120	359.767	536.01	183.524	-1.55048	3.02116e-52	5.20869e-51	down
LOC_Os03g02920	850.623	1142.81	558.432	-1.03619	3.05522e-52	5.26342e-51	down
LOC_Os01g67540	373.56	552.289	194.83	-1.50166	3.17259e-52	5.46148e-51	down
LOC_Os12g02200	742.045	468.306	1015.78	1.11866	5.15713e-52	8.84424e-51	up
LOC_Os01g39330	232.485	372.419	92.5501	-2.00928	5.68971e-52	9.75023e-51	down
LOC_Os07g48280	599.32	833.868	364.772	-1.19479	6.0642e-52	1.03841e-50	down
LOC_Os10g39410	1153.84	1552.7	754.973	-1.03864	6.42803e-52	1.09823e-50	down
LOC_Os01g45990	451.201	648.679	253.723	-1.35527	7.15559e-52	1.22162e-50	down
LOC_Os01g32460	413.226	602.94	223.513	-1.43555	1.16717e-51	1.98664e-50	down
LOC_Os02g45310	671.896	940.102	403.691	-1.21661	1.30882e-51	2.22441e-50	down
LOC_Os11g11490	815.584	1098.78	532.389	-1.04234	1.6445e-51	2.79281e-50	down
LOC_Os08g39694	469.765	252.645	686.885	1.43926	2.02638e-51	3.43366e-50	up
novel.625	278.947	121.288	436.607	1.84589	2.2219e-51	3.75656e-50	up
LOC_Os05g12640	586.435	814.92	357.95	-1.18721	2.4196e-51	4.08471e-50	down
LOC_Os05g30750	464.225	667.308	261.141	-1.35146	3.11229e-51	5.24629e-50	down
LOC_Os02g09930	472.339	680.296	264.382	-1.36253	3.26793e-51	5.50457e-50	down
LOC_Os07g38470	299.79	456.757	142.824	-1.68033	3.62348e-51	6.09893e-50	down
LOC_Os03g08250	294.393	453.541	135.246	-1.74292	3.96053e-51	6.66132e-50	down
LOC_Os03g26860	910.908	591.706	1230.11	1.05443	4.22953e-51	7.10849e-50	up
LOC_Os02g43640	390.29	587.396	193.184	-1.60665	4.70835e-51	7.90154e-50	down
LOC_Os07g14600	942.252	1269.41	615.09	-1.04827	4.76239e-51	7.98632e-50	down
LOC_Os02g33330	176.397	296.126	56.6676	-2.38156	5.70045e-51	9.53827e-50	down
LOC_Os09g28354	566.515	800.465	332.565	-1.26496	6.12331e-51	1.02383e-49	down
LOC_Os06g49210	367.224	549.988	184.46	-1.58222	6.39476e-51	1.06764e-49	down
LOC_Os02g18070	521.868	736.428	307.308	-1.25887	6.59021e-51	1.09947e-49	down
LOC_Os05g38140	793.359	1080.86	505.863	-1.09497	6.64089e-51	1.10629e-49	down
LOC_Os03g10320	291.446	137.494	445.399	1.6949	6.80954e-51	1.13356e-49	up
LOC_Os04g38310	582.848	814.535	351.162	-1.21185	6.92796e-51	1.15158e-49	down
LOC_Os04g38042	199.603	327.464	71.7412	-2.19411	1.05171e-50	1.73927e-49	down
LOC_Os01g65904	496.441	288.894	703.988	1.28342	1.2547e-50	2.06744e-49	up
LOC_Os11g13750	123.856	222.319	25.3925	-3.13558	1.63119e-50	2.68195e-49	down
LOC_Os06g49660	292.409	447.831	136.987	-1.70917	1.65563e-50	2.72017e-49	down
LOC_Os09g31200	422.084	612.466	231.701	-1.39967	1.78818e-50	2.93583e-49	down
LOC_Os10g36690	869.852	1173.5	566.202	-1.04901	1.90864e-50	3.13133e-49	down
LOC_Os09g28390	279.944	429.155	130.733	-1.71297	2.0272e-50	3.32343e-49	down
LOC_Os01g54080	819.125	1119.89	518.359	-1.10797	2.04179e-50	3.34494e-49	down
LOC_Os08g28670	289.744	134.497	444.991	1.72403	2.1255e-50	3.47956e-49	up
LOC_Os04g33690	682.197	933.787	430.607	-1.11357	2.1857e-50	3.57297e-49	down
LOC_Os05g33690	371.23	547.17	195.291	-1.48936	2.27121e-50	3.71008e-49	down
LOC_Os12g36940	295.686	452.34	139.033	-1.70272	2.66413e-50	4.34255e-49	down
LOC_Os11g44380	306.761	467.357	146.164	-1.67544	2.91695e-50	4.75124e-49	down
LOC_Os01g47580	119.048	218.8	19.2948	-3.52334	3.13241e-50	5.09852e-49	down
LOC_Os07g38830	777.663	1044.23	511.096	-1.03134	3.79785e-50	6.17279e-49	down
LOC_Os01g55000	664.091	911.206	416.976	-1.12802	4.33251e-50	7.02671e-49	down
LOC_Os01g62950	223.048	358.486	87.61	-2.03127	4.71701e-50	7.6394e-49	down
LOC_Os01g19480	291.134	445.997	136.271	-1.71063	5.92461e-50	9.57468e-49	down
LOC_Os02g41800	765.001	1041.26	488.744	-1.09252	8.28227e-50	1.33563e-48	down
LOC_Os12g01940	1004.58	632.615	1376.54	1.12314	9.33819e-50	1.50378e-48	up
LOC_Os01g63580	506.244	719.225	293.263	-1.29735	1.06161e-49	1.70714e-48	down
LOC_Os07g08150	780.426	1068.22	492.637	-1.1187	1.108e-49	1.78049e-48	down
LOC_Os05g39250	250.859	104.17	397.548	1.93642	1.45568e-49	2.33423e-48	up
LOC_Os09g02180	149.041	40.4235	257.659	2.67148	1.84448e-49	2.9556e-48	up
LOC_Os05g39050	423.711	612.036	235.385	-1.37973	2.03545e-49	3.2593e-48	down
LOC_Os02g57110	648.821	891.521	406.121	-1.13486	2.34647e-49	3.74939e-48	down
LOC_Os04g40990	566.929	307.738	826.12	1.42217	3.39566e-49	5.41446e-48	up
LOC_Os05g46550	459.549	651.985	267.113	-1.2886	3.92792e-49	6.25437e-48	down
LOC_Os11g39990	280.174	428.832	131.516	-1.70613	5.14584e-49	8.16502e-48	down
LOC_Os04g55270	292.038	135.981	448.096	1.71812	5.34217e-49	8.47061e-48	up
LOC_Os06g29630	731.285	474.061	988.51	1.06091	5.75976e-49	9.10732e-48	up
LOC_Os04g44510	270.817	415.841	125.793	-1.72831	6.58401e-49	1.04034e-47	down
LOC_Os07g42280	706.767	963.34	450.194	-1.09424	6.59332e-49	1.04108e-47	down
LOC_Os03g21419	205.54	336.596	74.4837	-2.15945	8.36607e-49	1.31734e-47	down
LOC_Os09g36320	331.579	498.384	164.773	-1.5888	8.90859e-49	1.40179e-47	down
LOC_Os01g62200	581.042	824.93	337.154	-1.29236	9.33665e-49	1.46813e-47	down
LOC_Os03g01800	863.701	1155.05	572.353	-1.01283	1.02987e-48	1.61716e-47	down
LOC_Os07g10530	351.776	518.784	184.768	-1.48717	1.11854e-48	1.7552e-47	down
LOC_Os03g42070	289.355	138.005	440.705	1.67524	1.44357e-48	2.25742e-47	up
LOC_Os02g55910	774.06	1035.76	512.356	-1.01499	1.56639e-48	2.44612e-47	down
LOC_Os01g54670	145.584	251.085	40.0834	-2.6434	2.35382e-48	3.65816e-47	down
LOC_Os06g43430	781.603	516.53	1046.68	1.01791	2.48704e-48	3.86257e-47	up
LOC_Os06g50900	334.99	495.616	174.364	-1.50925	2.49573e-48	3.87342e-47	down
LOC_Os12g38170	1145.9	1558.94	732.858	-1.0921	2.53717e-48	3.93504e-47	down
LOC_Os06g13830	429.339	617.557	241.121	-1.35599	3.15761e-48	4.88729e-47	down
LOC_Os10g40810	350.956	518.661	183.252	-1.49807	3.31342e-48	5.12497e-47	down
LOC_Os02g52280	663.042	935.107	390.977	-1.26334	3.41195e-48	5.27378e-47	down
LOC_Os01g62290	619.066	382.652	855.481	1.16299	3.76771e-48	5.8197e-47	up
LOC_Os10g23820	409.521	596.61	222.431	-1.42142	4.39311e-48	6.7765e-47	down
LOC_Os09g19930	457.349	655.287	259.41	-1.34402	4.47531e-48	6.8986e-47	down
LOC_Os03g02980	657.46	420.58	894.339	1.08923	4.66681e-48	7.18404e-47	up
LOC_Os03g59240	553.313	769.625	337.001	-1.19271	6.0492e-48	9.29317e-47	down
LOC_Os03g16780	994.485	635.843	1353.13	1.08803	7.07156e-48	1.08491e-46	up
LOC_Os11g12320	175.351	289.639	61.0622	-2.25479	8.35933e-48	1.28161e-46	down
LOC_Os01g64440	180.863	296.972	64.7533	-2.19046	9.2227e-48	1.41303e-46	down
LOC_Os01g62260	322.871	486.629	159.112	-1.62103	1.1088e-47	1.69652e-46	down
LOC_Os07g39220	731.485	1003.86	459.108	-1.12756	1.44695e-47	2.20648e-46	down
LOC_Os04g23550	110.724	202.795	18.6537	-3.46584	1.45921e-47	2.22367e-46	down
LOC_Os11g31980	158.265	266.386	50.1439	-2.41425	3.29652e-47	5.00339e-46	down
LOC_Os06g41770	759.608	1025.18	494.041	-1.05527	3.73168e-47	5.6563e-46	down
LOC_Os11g35400	306.277	458.897	153.658	-1.57807	4.00328e-47	6.06394e-46	down
LOC_Os11g03240	193.048	314.425	71.6718	-2.12598	4.51063e-47	6.82334e-46	down
LOC_Os09g34214	338.614	170.393	506.835	1.56918	4.82849e-47	7.29931e-46	up
LOC_Os03g14910	173.896	288.946	58.8459	-2.29619	5.2809e-47	7.97261e-46	down
LOC_Os02g03430	308.406	467.569	149.243	-1.6532	6.83461e-47	1.03046e-45	down
LOC_Os08g31950	132.097	230.572	33.622	-2.77808	7.20051e-47	1.0849e-45	down
LOC_Os03g31180	586.825	803.334	370.316	-1.11829	7.985e-47	1.2023e-45	down
LOC_Os12g05260	626.254	872.347	380.16	-1.19332	8.06655e-47	1.21378e-45	down
LOC_Os02g55870	344.685	509.393	179.977	-1.49483	1.54266e-46	2.31206e-45	down
LOC_Os05g39930	363.321	532.769	193.873	-1.45601	1.68789e-46	2.52638e-45	down
LOC_Os01g49200	133.551	235.042	32.0599	-2.86622	1.72604e-46	2.58008e-45	down
LOC_Os11g44560	197.255	316.717	77.7926	-2.02496	2.31093e-46	3.44757e-45	down
LOC_Os10g26500	366.668	538.566	194.77	-1.46888	2.89642e-46	4.31537e-45	down
LOC_Os03g53910	766.161	500.07	1032.25	1.04778	2.9086e-46	4.33067e-45	up
LOC_Os01g69960	165.247	273.974	56.5205	-2.27144	3.19127e-46	4.74843e-45	down
LOC_Os04g43490	525	731.59	318.41	-1.19839	3.26044e-46	4.84817e-45	down
LOC_Os03g58350	215.709	341.086	90.3317	-1.91903	3.41722e-46	5.07465e-45	down
LOC_Os03g43990	434.313	615.777	252.848	-1.28559	3.74516e-46	5.54352e-45	down
LOC_Os03g07450	309.355	463.857	154.852	-1.5851	4.30011e-46	6.3608e-45	down
LOC_Os07g44250	387.921	205.957	569.885	1.46875	4.4855e-46	6.63071e-45	up
LOC_Os10g42130	321.794	481.138	162.45	-1.55887	5.93477e-46	8.756e-45	down
LOC_Os04g30240	376.446	543.098	209.795	-1.37355	8.05534e-46	1.18462e-44	down
LOC_Os03g02260	469.627	255.035	684.218	1.42354	9.03941e-46	1.32761e-44	up
LOC_Os05g50910	376.757	551.128	202.385	-1.43945	9.66309e-46	1.41829e-44	down
LOC_Os11g05290	213.422	344.601	82.243	-2.0575	1.23491e-45	1.80669e-44	down
LOC_Os10g05950	297.561	445.143	149.98	-1.56519	1.25973e-45	1.84181e-44	down
LOC_Os01g62810	338.895	499.201	178.589	-1.48502	1.47827e-45	2.15718e-44	down
LOC_Os04g05010	457.43	264.996	649.865	1.29191	1.48691e-45	2.16838e-44	up
LOC_Os05g48422	652.706	393.011	912.401	1.21687	1.92629e-45	2.79836e-44	up
LOC_Os07g06610	590.577	806.785	374.37	-1.10724	2.03754e-45	2.95618e-44	down
LOC_Os09g34230	633.3	400.112	866.487	1.11463	2.35441e-45	3.40938e-44	up
LOC_Os06g12230	356.595	526.346	186.844	-1.49401	3.09859e-45	4.47846e-44	down
LOC_Os11g29380	140.541	240.223	40.8596	-2.56324	3.35046e-45	4.83941e-44	down
LOC_Os01g09280	547.176	337.818	756.533	1.1626	3.59547e-45	5.19001e-44	up
LOC_Os03g03700	362.101	527.564	196.638	-1.42556	4.29098e-45	6.18609e-44	down
LOC_Os08g31760	230.48	361.698	99.2606	-1.86382	4.49299e-45	6.46911e-44	down
LOC_Os03g06510	393.833	563.676	223.99	-1.32938	5.21812e-45	7.49416e-44	down
LOC_Os02g02830	744.581	493.319	995.843	1.01185	7.9247e-45	1.13597e-43	up
LOC_Os05g43530	677.127	912.547	441.707	-1.0485	8.35392e-45	1.19599e-43	down
LOC_Os05g37660	167.287	275.107	59.4666	-2.2205	8.90684e-45	1.27354e-43	down
LOC_Os02g50570	343.8	508.838	178.761	-1.50288	8.92506e-45	1.27535e-43	down
LOC_Os03g06670	150.288	254.543	46.0319	-2.47098	9.57079e-45	1.36676e-43	down
LOC_Os10g18480	133.502	36.6479	230.355	2.64813	1.10511e-44	1.57419e-43	up
LOC_Os11g34080	364.95	534.396	195.503	-1.44442	1.14928e-44	1.63506e-43	down
LOC_Os08g39850	264.333	404.472	124.194	-1.69267	2.55533e-44	3.61954e-43	down
LOC_Os04g48760	103.198	188.814	17.5818	-3.42262	2.62201e-44	3.70937e-43	down
LOC_Os05g48070	492.202	297.375	687.029	1.20845	2.89602e-44	4.08937e-43	up
LOC_Os12g13360	246.599	116.146	377.053	1.69789	2.93231e-44	4.13803e-43	up
LOC_Os03g16390	376.442	559.017	193.867	-1.51933	5.14648e-44	7.23566e-43	down
LOC_Os07g37010	578.573	789.304	367.842	-1.09982	5.2047e-44	7.31298e-43	down
LOC_Os01g02060	291.509	435.151	147.868	-1.55471	6.29311e-44	8.82591e-43	down
LOC_Os01g55500	166.454	274.497	58.4117	-2.24201	7.52899e-44	1.05332e-42	down
LOC_Os04g08390	170.535	278.268	62.8026	-2.15269	7.81002e-44	1.09196e-42	down
LOC_Os08g01610	296.709	444.465	148.954	-1.57864	8.10225e-44	1.13212e-42	down
novel.959	176.384	286.166	66.6014	-2.09413	8.36334e-44	1.16788e-42	down
LOC_Os01g61880	224.073	354.899	93.2472	-1.92363	8.82836e-44	1.23206e-42	down
LOC_Os01g61620	319.984	473.938	166.029	-1.51154	9.5327e-44	1.32873e-42	down
LOC_Os11g17930	723.781	967.645	479.916	-1.00866	9.69946e-44	1.35031e-42	down
LOC_Os07g48830	672.396	432.946	911.845	1.07438	1.22293e-43	1.69834e-42	up
LOC_Os03g63540	399.345	570.282	228.409	-1.32232	1.27352e-43	1.76752e-42	down
LOC_Os04g42860	181.376	293.064	69.6889	-2.07476	1.47858e-43	2.04712e-42	down
LOC_Os06g04169	329.106	480.893	177.32	-1.43821	1.53809e-43	2.12692e-42	down
LOC_Os02g03710	285.796	133.401	438.191	1.71957	2.02183e-43	2.78566e-42	up
LOC_Os10g28350	250.57	118.815	382.324	1.68497	2.19251e-43	3.01899e-42	up
LOC_Os05g15850	184.142	294.79	73.495	-2.00836	2.27758e-43	3.12853e-42	down
LOC_Os04g22900	661.418	889.179	433.657	-1.03846	2.34184e-43	3.2145e-42	down
LOC_Os01g73790	581.382	789.359	373.405	-1.07914	2.34299e-43	3.2145e-42	down
LOC_Os02g52810	692.917	931.053	454.781	-1.0334	2.44987e-43	3.3591e-42	down
LOC_Os03g08490	6585.26	3863.34	9307.17	1.26859	3.01588e-43	4.1277e-42	up
LOC_Os08g44420	158.567	260.814	56.3197	-2.21927	3.04355e-43	4.16307e-42	down
LOC_Os11g42220	289.443	435.863	143.024	-1.60605	4.96161e-43	6.74601e-42	down
LOC_Os03g11300	590.623	373.962	807.283	1.11023	5.66755e-43	7.69202e-42	up
LOC_Os12g03420	167.631	272.831	62.4306	-2.12044	6.54672e-43	8.87461e-42	down
LOC_Os01g47760	397.863	574.609	221.116	-1.37298	6.74212e-43	9.13405e-42	down
LOC_Os08g02996	220.816	342.158	99.4734	-1.77902	6.85303e-43	9.27877e-42	down
LOC_Os05g31160	181.526	291.276	71.776	-2.02955	7.61033e-43	1.02919e-41	down
LOC_Os01g72610	688.809	933.755	443.862	-1.07709	8.70112e-43	1.176e-41	down
LOC_Os09g35670	613.958	391.29	836.627	1.09711	1.33075e-42	1.79005e-41	up
LOC_Os01g59120	137.632	231.731	43.5319	-2.41987	1.44433e-42	1.94168e-41	down
LOC_Os03g04130	333.142	178.943	487.34	1.44233	1.83211e-42	2.45718e-41	up
LOC_Os08g13795	273.383	136.371	410.396	1.59077	2.17847e-42	2.91309e-41	up
LOC_Os05g29750	196.012	83.3698	308.653	1.8876	2.42134e-42	3.23216e-41	up
LOC_Os05g31670	377.257	212.355	542.16	1.3506	2.59529e-42	3.45825e-41	up
LOC_Os06g08250	455.015	645.545	264.486	-1.28442	2.66317e-42	3.54454e-41	down
LOC_Os07g35340	282.865	422.142	143.588	-1.55747	2.81906e-42	3.74764e-41	down
LOC_Os06g10600	256.903	387.43	126.376	-1.61396	3.15491e-42	4.18675e-41	down
LOC_Os08g39590	202.247	318.618	85.8758	-1.89666	3.59772e-42	4.76604e-41	down
LOC_Os07g14740	249.798	378.95	120.646	-1.6481	4.53149e-42	5.98209e-41	down
LOC_Os11g14380	146.863	243.757	49.9681	-2.28762	4.85055e-42	6.39585e-41	down
LOC_Os02g09480	241.414	368.144	114.684	-1.68211	5.34464e-42	7.03509e-41	down
LOC_Os01g59510	515.292	318.093	712.492	1.16384	5.94551e-42	7.81695e-41	up
LOC_Os12g21784	567.104	362.056	772.152	1.0942	6.61414e-42	8.68096e-41	up
LOC_Os03g18130	686.442	450.868	922.015	1.03033	9.87742e-42	1.29266e-40	up
LOC_Os08g42320	608.702	397.238	820.166	1.04651	1.17227e-41	1.53239e-40	up
LOC_Os07g18750	579.354	796.832	361.876	-1.14321	1.6006e-41	2.0911e-40	down
LOC_Os10g28230	140.025	236.078	43.9709	-2.43482	1.88373e-41	2.45393e-40	down
LOC_Os10g31850	610.741	397.16	824.322	1.0513	2.22488e-41	2.8917e-40	up
LOC_Os02g44230	95.3349	174.803	15.8667	-3.47903	2.44524e-41	3.1763e-40	down
LOC_Os05g41150	325.209	479.688	170.729	-1.49855	2.7847e-41	3.60898e-40	down
LOC_Os02g47130	150.078	249.637	50.5181	-2.29102	4.47895e-41	5.77836e-40	down
LOC_Os02g45750	333.89	483.614	184.165	-1.39289	4.99383e-41	6.43529e-40	down
LOC_Os02g39330	260.631	396.279	124.983	-1.66742	5.50879e-41	7.09487e-40	down
LOC_Os03g19990	117.928	206.796	29.0608	-2.81146	5.90303e-41	7.59831e-40	down
LOC_Os06g06720	384.294	224.552	544.036	1.27777	7.32701e-41	9.41523e-40	up
LOC_Os01g55220	138.555	231.943	45.1658	-2.37494	7.99834e-41	1.02721e-39	down
LOC_Os04g52190	194.652	306.263	83.0411	-1.88959	1.02094e-40	1.30599e-39	down
LOC_Os04g31290	429.799	259.941	599.656	1.20628	1.24915e-40	1.59523e-39	up
LOC_Os06g49760	206.137	323.091	89.1831	-1.85712	1.34893e-40	1.72169e-39	down
LOC_Os06g01972	423.221	601.91	244.533	-1.30748	1.41137e-40	1.80037e-39	down
LOC_Os03g53170	591.244	385.582	796.905	1.04581	1.45237e-40	1.84955e-39	up
LOC_Os11g05394	532.717	340.551	724.883	1.08828	1.5935e-40	2.02474e-39	up
LOC_Os03g26229	323.705	169.823	477.588	1.49339	1.90199e-40	2.40728e-39	up
LOC_Os01g14110	539.877	739.926	339.828	-1.12025	1.96825e-40	2.48836e-39	down
LOC_Os06g45060	428.915	259.441	598.388	1.20625	2.03078e-40	2.566e-39	up
LOC_Os07g07900	354.811	202.272	507.35	1.32798	2.03337e-40	2.56784e-39	up
LOC_Os09g17660	161.414	261.137	61.6913	-2.07945	2.21304e-40	2.79008e-39	down
LOC_Os02g53130	274.085	417.856	130.314	-1.68736	2.57438e-40	3.24384e-39	down
LOC_Os08g33100	150.852	249.257	52.4466	-2.26628	3.81165e-40	4.78427e-39	down
LOC_Os03g12660	126.963	216.588	37.3382	-2.53975	4.82898e-40	6.05449e-39	down
LOC_Os02g21040	209.338	324.53	94.146	-1.78573	5.03306e-40	6.3034e-39	down
LOC_Os06g10210	347.718	499.113	196.323	-1.3463	5.52468e-40	6.91529e-39	down
LOC_Os07g49240	578.958	789.741	368.175	-1.09878	5.64605e-40	7.06332e-39	down
LOC_Os10g43060	367.394	523.649	211.139	-1.31029	5.96873e-40	7.45467e-39	down
LOC_Os09g34960	351.023	502.505	199.541	-1.33363	7.94959e-40	9.90314e-39	down
LOC_Os02g09740	275.704	411.14	140.268	-1.5528	8.04651e-40	1.00167e-38	down
LOC_Os04g49980	624.468	406.252	842.685	1.05531	8.11576e-40	1.00973e-38	up
LOC_Os01g31800	163.458	264.085	62.8312	-2.07691	8.22257e-40	1.02134e-38	down
LOC_Os01g46800	106.021	186.319	25.7238	-2.86154	1.05522e-39	1.30856e-38	down
LOC_Os03g61010	329.131	478.063	180.199	-1.40485	1.20285e-39	1.48757e-38	down
LOC_Os05g48890	98.5304	176.429	20.6321	-3.09616	1.48725e-39	1.8353e-38	down
LOC_Os08g37300	448.538	636.524	260.552	-1.29496	1.60534e-39	1.97779e-38	down
LOC_Os11g37670	91.9357	167.691	16.18	-3.39037	1.95875e-39	2.40928e-38	down
LOC_Os03g56800	681.639	454.69	908.588	1.00019	1.99369e-39	2.45093e-38	up
LOC_Os03g08520	96.6783	173.932	19.4251	-3.17074	2.32806e-39	2.85426e-38	down
LOC_Os12g39980	97.4392	174.218	20.6607	-3.07827	2.63648e-39	3.22717e-38	down
LOC_Os01g39830	582.015	784.54	379.491	-1.04951	2.76101e-39	3.37596e-38	down
LOC_Os07g23150	376.912	534.581	219.243	-1.2853	3.91599e-39	4.77789e-38	down
LOC_Os06g21480	516.053	328.842	703.263	1.09533	4.05137e-39	4.93511e-38	up
LOC_Os10g42490	146.279	239.655	52.9023	-2.1862	4.53406e-39	5.51126e-38	down
LOC_Os06g33970	100.726	180.208	21.2445	-3.08126	4.9087e-39	5.9539e-38	down
LOC_Os06g08090	576.502	772.46	380.544	-1.02025	5.47802e-39	6.63734e-38	down
LOC_Os02g58480	351.209	506.554	195.865	-1.37231	5.7671e-39	6.98388e-38	down
LOC_Os08g42470	129.846	217.565	42.1277	-2.37351	6.11664e-39	7.40322e-38	down
LOC_Os01g07590	693.423	457.707	929.14	1.0223	8.59824e-39	1.03791e-37	up
LOC_Os05g26840	414.718	577.129	252.307	-1.19516	9.17352e-39	1.10677e-37	down
LOC_Os04g38570	123.251	210.048	36.4543	-2.51261	9.3272e-39	1.12412e-37	down
LOC_Os11g31950	526.12	714.689	337.551	-1.08154	1.01449e-38	1.22072e-37	down
LOC_Os10g31780	321.727	477.664	165.79	-1.51903	1.07337e-38	1.29021e-37	down
LOC_Os02g15290	102.652	200.803	4.50106	-5.5337	1.3086e-38	1.57045e-37	down
LOC_Os03g19780	173.444	274.839	72.0497	-1.92574	1.66962e-38	2.00055e-37	down
novel.971	539.17	344.133	734.207	1.09034	1.82889e-38	2.18678e-37	up
LOC_Os05g08610	458.11	633.909	282.312	-1.16712	1.86682e-38	2.23095e-37	down
LOC_Os08g34790	142.854	234.514	51.1931	-2.1945	1.95313e-38	2.33287e-37	down
LOC_Os04g44870	578.101	776.262	379.94	-1.02862	2.12757e-38	2.53721e-37	down
LOC_Os06g45990	191.806	299.214	84.3974	-1.82447	2.25178e-38	2.68394e-37	down
LOC_Os07g01530	157.549	254.535	60.5621	-2.06095	2.3388e-38	2.78473e-37	down
LOC_Os04g06520	412.376	587.013	237.74	-1.29658	2.70636e-38	3.21563e-37	down
LOC_Os04g37770	266.539	393.481	139.596	-1.49207	2.82217e-38	3.34972e-37	down
LOC_Os02g53720	456.489	629.514	283.463	-1.15494	3.00791e-38	3.56832e-37	down
LOC_Os04g48130	420.54	587.145	253.935	-1.20746	3.29957e-38	3.91228e-37	down
LOC_Os02g31867	556.147	755.198	357.097	-1.07841	3.36606e-38	3.98322e-37	down
LOC_Os12g43510	198.362	310.316	86.4081	-1.85155	3.36642e-38	3.98322e-37	down
LOC_Os07g05940	306.716	454.514	158.917	-1.5147	3.69134e-38	4.35632e-37	down
LOC_Os10g02770	132.292	220.974	43.6096	-2.35802	3.83213e-38	4.52013e-37	down
LOC_Os07g41600	309.149	445.288	173.01	-1.36588	4.17332e-38	4.90982e-37	down
LOC_Os04g13140	158.186	62.8954	253.477	2.01067	4.30548e-38	5.06267e-37	up
LOC_Os09g07800	509.256	690.847	327.665	-1.07491	5.0845e-38	5.96942e-37	down
LOC_Os06g37020	273.573	412.025	135.122	-1.59541	6.83008e-38	7.98578e-37	down
LOC_Os04g53950	235.618	355.918	115.318	-1.63536	7.18528e-38	8.38812e-37	down
LOC_Os06g46140	130.386	217.75	43.021	-2.34303	7.49396e-38	8.74398e-37	down
LOC_Os10g34170	234.069	353.494	114.644	-1.61814	7.99153e-38	9.30065e-37	down
LOC_Os04g33740	88.3286	160.937	15.7206	-3.33682	9.55885e-38	1.10736e-36	down
LOC_Os09g32670	553.859	746.797	360.921	-1.04738	1.00138e-37	1.15948e-36	down
LOC_Os04g07830	202.63	314.187	91.073	-1.78877	1.05469e-37	1.22058e-36	down
LOC_Os12g34510	196.828	304.335	89.3219	-1.7738	1.17555e-37	1.35906e-36	down
LOC_Os01g57910	363.769	208.312	519.226	1.3195	1.23553e-37	1.42623e-36	up
LOC_Os01g61044	128.627	41.0455	216.209	2.39401	1.2805e-37	1.47589e-36	up
LOC_Os02g40900	272.184	141.096	403.272	1.51625	1.32761e-37	1.52941e-36	up
LOC_Os12g12934	152.259	59.2515	245.267	2.0476	1.36761e-37	1.57469e-36	up
LOC_Os06g44250	192.837	299.55	86.1249	-1.80203	1.58229e-37	1.8182e-36	down
LOC_Os04g46940	479.318	662.928	295.708	-1.16494	1.60882e-37	1.84774e-36	down
LOC_Os04g39140	480.52	653.852	307.189	-1.08794	1.6572e-37	1.90235e-36	down
LOC_Os08g07660	84.1238	161.996	6.25211	-4.68143	1.74991e-37	2.00776e-36	down
LOC_Os11g04560	249.177	372.557	125.797	-1.56994	1.93013e-37	2.21229e-36	down
LOC_Os03g50970	262.058	388.075	136.04	-1.5059	3.17087e-37	3.61616e-36	down
LOC_Os04g49690	188.808	299.341	78.2745	-1.93675	3.72662e-37	4.24357e-36	down
novel.724	247.596	368.185	127.007	-1.53754	3.87812e-37	4.41387e-36	down
LOC_Os03g08624	114.88	32.3584	197.403	2.60272	4.35644e-37	4.95082e-36	up
LOC_Os01g43750	200.834	312.096	89.5717	-1.80213	4.93097e-37	5.59254e-36	down
LOC_Os12g09640	236.93	356.744	117.116	-1.59735	4.97752e-37	5.64252e-36	down
novel.83	598.044	379.396	816.692	1.10503	5.28683e-37	5.97958e-36	up
LOC_Os01g44960	358.196	508.154	208.238	-1.28825	5.28803e-37	5.97958e-36	down
LOC_Os12g43363	239.733	360.1	119.365	-1.60247	5.94815e-37	6.71934e-36	down
LOC_Os03g59300	236.768	354.128	119.408	-1.56341	6.00425e-37	6.77934e-36	down
LOC_Os01g02700	561.774	373.938	749.61	1.00455	8.3926e-37	9.45719e-36	up
LOC_Os03g04530	116.395	199.383	33.4064	-2.57205	8.59055e-37	9.67545e-36	down
LOC_Os09g33870	636.399	423.407	849.391	1.00199	9.27396e-37	1.04348e-35	up
LOC_Os02g55970	303.982	441.383	166.581	-1.40433	9.93543e-37	1.11515e-35	down
LOC_Os05g48260	454.2	624.392	284.007	-1.14001	1.14333e-36	1.2801e-35	down
LOC_Os03g62010	254.635	378.936	130.334	-1.55051	1.82458e-36	2.03382e-35	down
LOC_Os01g48500	573.639	382.512	764.766	1.00029	2.02963e-36	2.25795e-35	up
LOC_Os11g11330	300.051	166.512	433.59	1.37905	2.07682e-36	2.30932e-35	up
LOC_Os09g02770	532.007	340.825	723.19	1.08579	2.13357e-36	2.37126e-35	up
LOC_Os04g32540	194.479	299.529	89.4297	-1.74983	2.83364e-36	3.13093e-35	down
LOC_Os02g07190	217.616	327.729	107.503	-1.60864	3.98578e-36	4.39326e-35	down
LOC_Os12g26880	427.459	586.234	268.683	-1.12634	4.33342e-36	4.7718e-35	down
LOC_Os06g38160	80.7198	148.77	12.6693	-3.55681	4.85743e-36	5.34364e-35	down
LOC_Os02g51320	124.96	207.233	42.6873	-2.27446	6.03741e-36	6.62568e-35	down
LOC_Os03g56060	374.317	523.645	224.988	-1.21732	6.95499e-36	7.60327e-35	down
LOC_Os08g01670	244.002	361.723	126.281	-1.52421	7.77227e-36	8.4804e-35	down
LOC_Os06g21730	602.82	401.153	804.488	1.00397	8.73615e-36	9.52295e-35	up
LOC_Os03g17790	811.479	322.508	1300.45	2.01215	1.05405e-35	1.14623e-34	up
LOC_Os09g28300	262.302	388.223	136.38	-1.51374	1.30693e-35	1.4185e-34	down
LOC_Os01g72000	515.71	690.8	340.619	-1.0187	1.42829e-35	1.54727e-34	down
LOC_Os03g45340	207.061	314.568	99.5535	-1.66378	1.51671e-35	1.64149e-34	down
LOC_Os01g64110	212.484	320.906	104.062	-1.63047	1.65585e-35	1.79037e-34	down
LOC_Os11g06800	220.432	108.275	332.589	1.62226	1.87376e-35	2.02405e-34	up
LOC_Os02g43550	239.153	355.795	122.511	-1.5442	2.40879e-35	2.59582e-34	down
LOC_Os05g07060	427.015	591.691	262.339	-1.17929	2.8681e-35	3.08494e-34	down
LOC_Os12g36830	191.889	297.739	86.0397	-1.77906	3.17765e-35	3.40981e-34	down
LOC_Os04g30490	320.263	463.434	177.091	-1.38339	3.19073e-35	3.42224e-34	down
LOC_Os11g44950	177.842	275.359	80.3247	-1.77536	3.44333e-35	3.69142e-34	down
LOC_Os09g27450	388.669	545.627	231.71	-1.23568	3.51142e-35	3.76263e-34	down
LOC_Os06g05980	213.391	321.789	104.992	-1.60905	3.82696e-35	4.09303e-34	down
LOC_Os04g11956	150.636	243.168	58.104	-2.04732	4.23493e-35	4.51872e-34	down
LOC_Os01g57710	404.938	250.646	559.23	1.15756	4.50799e-35	4.80556e-34	up
LOC_Os02g03790	395.041	545.804	244.278	-1.16383	4.64166e-35	4.94573e-34	down
LOC_Os10g07210	121.712	202.834	40.5894	-2.32895	5.11622e-35	5.44597e-34	down
LOC_Os08g41290	334.855	479.7	190.01	-1.33661	5.44616e-35	5.79206e-34	down
LOC_Os03g13300	231.329	348.985	113.674	-1.61637	5.7309e-35	6.08918e-34	down
LOC_Os12g09584	461.882	292.414	631.349	1.10857	5.99084e-35	6.3624e-34	up
LOC_Os05g11210	669.799	437.721	901.876	1.04587	6.21837e-35	6.60095e-34	up
LOC_Os01g42320	87.9391	17.0423	158.836	3.22684	6.23283e-35	6.61012e-34	up
LOC_Os03g29360	245.717	374.315	117.119	-1.66351	7.73616e-35	8.18533e-34	down
LOC_Os07g41320	339.631	195.125	484.138	1.31132	7.82077e-35	8.27101e-34	up
LOC_Os03g05470	553.565	742.313	364.818	-1.02058	8.67409e-35	9.16064e-34	down
LOC_Os04g54620	151.758	244.444	59.0722	-2.05201	8.89733e-35	9.38332e-34	down
LOC_Os03g57349	569.981	379.665	760.298	1.00315	8.96709e-35	9.4525e-34	up
LOC_Os09g25934	465.068	296.686	633.45	1.09251	9.14255e-35	9.63298e-34	up
LOC_Os05g47540	130.209	48.0535	212.365	2.14538	1.02024e-34	1.07347e-33	up
LOC_Os06g47620	231.467	345.328	117.606	-1.55241	1.02673e-34	1.0798e-33	down
LOC_Os05g10330	225.369	337.709	113.029	-1.58432	1.07835e-34	1.13304e-33	down
LOC_Os04g46110	559.334	751.472	367.197	-1.03044	1.24774e-34	1.30981e-33	down
LOC_Os01g41730	499.316	674.16	324.473	-1.05684	1.26706e-34	1.32947e-33	down
novel.436	192.198	88.8529	295.544	1.73484	1.32739e-34	1.39214e-33	up
LOC_Os01g33040	105.905	180.233	31.5777	-2.50099	1.37426e-34	1.43996e-33	down
LOC_Os02g07420	565.396	373.812	756.98	1.01963	1.71724e-34	1.79685e-33	up
LOC_Os05g32760	204.365	309.688	99.0427	-1.63757	1.76535e-34	1.84549e-33	down
LOC_Os09g31120	363.55	510.339	216.762	-1.23826	1.83137e-34	1.91275e-33	down
LOC_Os01g11710	268.677	389.886	147.468	-1.40193	1.96337e-34	2.04685e-33	down
LOC_Os01g11160	150.327	238.312	62.3421	-1.93672	1.97038e-34	2.05321e-33	down
LOC_Os04g27190	166.25	260.807	71.6935	-1.86926	1.98384e-34	2.06629e-33	down
LOC_Os02g57140	331.303	473.115	189.49	-1.32595	2.082e-34	2.16555e-33	down
LOC_Os11g19240	175.189	274.336	76.0425	-1.86226	3.53046e-34	3.65206e-33	down
LOC_Os12g05040	296.552	432.426	160.677	-1.42179	3.58428e-34	3.70604e-33	down
LOC_Os09g21180	418.223	262.236	574.211	1.12861	3.97264e-34	4.10385e-33	up
LOC_Os06g48160	427.219	582.418	272.02	-1.1009	4.44435e-34	4.58072e-33	down
LOC_Os04g37500	368.224	516.37	220.079	-1.2331	4.85599e-34	4.99593e-33	down
LOC_Os08g35710	509.698	681.787	337.609	-1.01504	5.05563e-34	5.19896e-33	down
LOC_Os02g41904	238.036	350.62	125.451	-1.47886	5.24499e-34	5.39125e-33	down
LOC_Os08g04190	243.532	357.277	129.787	-1.45716	5.69911e-34	5.85274e-33	down
LOC_Os02g51620	455.077	615.976	294.179	-1.06621	5.89328e-34	6.0494e-33	down
LOC_Os09g34180	152.072	241.46	62.683	-1.95398	7.16439e-34	7.33099e-33	down
LOC_Os05g32350	206.269	309.765	102.772	-1.58874	8.63424e-34	8.79933e-33	down
LOC_Os05g12320	213.681	324.84	102.521	-1.6595	8.87257e-34	9.03411e-33	down
LOC_Os01g61160	154.857	243.429	66.2846	-1.88332	9.07214e-34	9.23317e-33	down
LOC_Os07g37290	324.484	462.018	186.951	-1.30277	9.12213e-34	9.27574e-33	down
LOC_Os11g26990	283.099	406.881	159.317	-1.35669	9.91912e-34	1.00816e-32	down
LOC_Os06g14420	422.123	583.352	260.894	-1.15876	1.09186e-33	1.10876e-32	down
LOC_Os01g47470	391.276	539.198	243.354	-1.14622	1.18883e-33	1.20615e-32	down
LOC_Os04g48416	297.834	429.976	165.692	-1.38402	1.30633e-33	1.32299e-32	down
LOC_Os04g54220	78.2655	14.011	142.52	3.35203	1.59443e-33	1.61045e-32	up
LOC_Os05g32130	262.402	382.096	142.709	-1.42885	2.08827e-33	2.099e-32	down
LOC_Os09g04710	279.074	405.299	152.848	-1.40575	2.40676e-33	2.41591e-32	down
LOC_Os10g41999	231.408	121.48	341.337	1.48912	2.4772e-33	2.48552e-32	up
LOC_Os03g58570	349.915	197.559	502.271	1.34589	2.51318e-33	2.51939e-32	up
LOC_Os06g13570	373.305	230.342	516.268	1.16554	2.58408e-33	2.58932e-32	up
LOC_Os06g03540	275.548	397.46	153.636	-1.37649	2.58642e-33	2.59053e-32	down
LOC_Os07g37350	475.888	639.052	312.725	-1.0291	2.60059e-33	2.60242e-32	down
novel.334	407.112	251.349	562.875	1.16397	3.07944e-33	3.07619e-32	up
LOC_Os09g20540	215.044	321.002	109.087	-1.56	3.10133e-33	3.0967e-32	down
LOC_Os06g46680	341.46	488.534	194.385	-1.32566	3.41394e-33	3.40435e-32	down
LOC_Os02g18080	162.983	256.01	69.9567	-1.86767	4.25555e-33	4.23615e-32	down
LOC_Os09g29540	170.463	264.785	76.1406	-1.80531	4.63081e-33	4.60163e-32	down
LOC_Os11g40810	282.608	404.873	160.342	-1.34176	4.85794e-33	4.82521e-32	down
LOC_Os09g38320	493.958	664.614	323.301	-1.04502	4.92143e-33	4.88483e-32	down
LOC_Os01g61630	180.966	85.6702	276.262	1.68792	5.21043e-33	5.16855e-32	up
LOC_Os01g12280	435.543	279.025	592.061	1.08518	5.25746e-33	5.21292e-32	up
LOC_Os02g22160	156.248	245.472	67.0252	-1.8847	5.42629e-33	5.37328e-32	down
LOC_Os09g26210	134.989	216.786	53.1918	-2.02701	5.59404e-33	5.53457e-32	down
LOC_Os12g36810	265.8	385.603	145.997	-1.4023	5.87832e-33	5.81076e-32	down
LOC_Os01g03870	244.275	132.905	355.645	1.42021	6.92624e-33	6.83176e-32	up
LOC_Os05g37520	567.889	759.466	376.312	-1.01076	7.20004e-33	7.09566e-32	down
LOC_Os03g06730	307.795	436.049	179.542	-1.28341	7.28477e-33	7.17605e-32	down
LOC_Os12g03720	455.135	614.963	295.307	-1.05443	8.13113e-33	8.00283e-32	down
LOC_Os07g37280	81.3737	17.9026	144.845	3.01642	8.4482e-33	8.3041e-32	up
LOC_Os10g36160	134.167	218.4	49.935	-2.13637	1.10108e-32	1.07717e-31	down
LOC_Os01g51570	217.083	323.839	110.328	-1.55089	1.15324e-32	1.12722e-31	down
LOC_Os01g08150	93.1498	160.613	25.6868	-2.66244	1.27803e-32	1.24706e-31	down
LOC_Os02g16500	178.878	278.199	79.5568	-1.79568	1.5082e-32	1.46786e-31	down
LOC_Os02g44990	276.721	156.413	397.03	1.34327	1.60562e-32	1.56e-31	up
LOC_Os01g04230	216.628	323.387	109.868	-1.55351	1.63953e-32	1.59091e-31	down
LOC_Os02g47180	245.523	361.709	129.336	-1.48773	1.67574e-32	1.62535e-31	down
LOC_Os05g03620	291.225	413.714	168.735	-1.29577	1.72688e-32	1.67352e-31	down
LOC_Os02g45760	302.151	426.601	177.702	-1.26719	1.91166e-32	1.85101e-31	down
LOC_Os04g44354	230.103	338.931	121.275	-1.48954	1.9239e-32	1.86127e-31	down
LOC_Os04g40510	194.487	294.586	94.3888	-1.64814	1.94633e-32	1.88217e-31	down
LOC_Os05g34820	565.704	760.733	370.675	-1.03236	2.13794e-32	2.06483e-31	down
LOC_Os01g60670	198.352	304.678	92.0264	-1.73302	2.57627e-32	2.48078e-31	down
LOC_Os07g05365	76.5375	14.846	138.229	3.21673	2.77989e-32	2.67572e-31	up
LOC_Os01g47370	76.8748	138.797	14.9527	-3.21379	2.82554e-32	2.71736e-31	down
LOC_Os06g50330	486.842	649.947	323.737	-1.00615	2.97913e-32	2.86142e-31	down
LOC_Os02g11110	501.441	327.582	675.299	1.04629	3.35025e-32	3.21653e-31	up
LOC_Os01g49210	188.886	288.15	89.6219	-1.67729	3.38017e-32	3.24251e-31	down
LOC_Os07g02460	456.757	295.484	618.031	1.06356	4.44924e-32	4.25187e-31	up
LOC_Os11g43590	284.959	408.117	161.801	-1.33325	4.69722e-32	4.4813e-31	down
LOC_Os09g16090	118.689	198.704	38.6741	-2.33901	5.32499e-32	5.0717e-31	down
LOC_Os03g10210	142.67	58.5428	226.797	1.95225	6.49712e-32	6.1777e-31	up
LOC_Os03g05920	236.242	349.618	122.865	-1.51878	7.85619e-32	7.45124e-31	down
LOC_Os03g46920	92.3923	159.157	25.6271	-2.63487	8.38233e-32	7.94031e-31	down
LOC_Os01g63480	491.562	664.664	318.461	-1.06756	9.77328e-32	9.23864e-31	down
LOC_Os12g38140	76.18	138.508	13.8524	-3.36978	1.04659e-31	9.88512e-31	down
LOC_Os05g36930	320.724	191.734	449.714	1.23013	1.11665e-31	1.05337e-30	up
LOC_Os12g41110	96.9904	166.214	27.7668	-2.57643	1.21241e-31	1.14275e-30	down
LOC_Os03g57780	363.291	499.575	227.008	-1.13593	1.33809e-31	1.25704e-30	down
LOC_Os10g18490	73.4899	13.5185	133.461	3.30097	1.41199e-31	1.32428e-30	up
LOC_Os12g41600	333.276	465.039	201.513	-1.2057	1.55689e-31	1.45597e-30	down
LOC_Os03g11540	105.655	176.437	34.8718	-2.33813	1.63036e-31	1.52341e-30	down
LOC_Os10g35180	110.229	182.591	37.8681	-2.26913	1.96743e-31	1.83459e-30	down
LOC_Os06g43600	268.324	387.122	149.527	-1.36765	2.00845e-31	1.87132e-30	down
LOC_Os01g70010	206.269	103.413	309.125	1.57739	2.2975e-31	2.13712e-30	up
LOC_Os11g41170	468.341	628.486	308.196	-1.02706	2.35898e-31	2.1934e-30	down
LOC_Os08g38270	237.641	349.363	125.919	-1.4823	2.40262e-31	2.23307e-30	down
LOC_Os09g10340	86.8293	151.633	22.0256	-2.78717	2.60936e-31	2.42423e-30	down
LOC_Os05g44420	370.236	512.887	227.585	-1.17451	2.71737e-31	2.52148e-30	down
LOC_Os07g40480	324.324	458.122	190.526	-1.26411	2.8102e-31	2.60549e-30	down
LOC_Os03g18910	166.634	258.743	74.5244	-1.78866	2.81654e-31	2.6103e-30	down
LOC_Os07g02810	234.747	342.754	126.741	-1.43782	2.9095e-31	2.69425e-30	down
LOC_Os07g32660	180.052	273.682	86.4226	-1.67006	2.96836e-31	2.74764e-30	down
LOC_Os05g39850	105.96	176.617	35.3035	-2.32436	3.3627e-31	3.09985e-30	down
LOC_Os11g42480	228.28	334.153	122.407	-1.44621	3.48159e-31	3.20702e-30	down
LOC_Os08g07890	250.656	372.844	128.468	-1.54822	3.66515e-31	3.37473e-30	down
LOC_Os09g38400	322.56	456.146	188.974	-1.26569	3.79014e-31	3.4884e-30	down
LOC_Os05g40200	449.867	603.866	295.868	-1.02847	4.45534e-31	4.09732e-30	down
LOC_Os06g35960	475.993	312.295	639.69	1.03357	4.47545e-31	4.11415e-30	up
LOC_Os10g08474	399.489	249.562	549.415	1.13885	4.76607e-31	4.37777e-30	up
LOC_Os06g43090	412.842	564.384	261.299	-1.10967	4.89907e-31	4.49629e-30	down
LOC_Os10g28060	83.1279	146.402	19.8534	-2.89437	5.3142e-31	4.87532e-30	down
LOC_Os12g06980	159.331	246.101	72.5606	-1.75782	5.32128e-31	4.87787e-30	down
LOC_Os04g01500	300.678	428.787	172.569	-1.3115	5.39551e-31	4.94393e-30	down
LOC_Os03g03790	210.803	314.307	107.298	-1.54931	6.20347e-31	5.67739e-30	down
LOC_Os02g46680	413.717	558.661	268.772	-1.05498	8.03602e-31	7.31619e-30	down
LOC_Os03g56944	102.385	170.662	34.1087	-2.31831	1.08155e-30	9.80738e-30	down
LOC_Os12g38880	349.175	218.567	479.784	1.13525	1.29602e-30	1.17334e-29	up
LOC_Os12g08720	300.23	430.568	169.893	-1.34669	1.38667e-30	1.25341e-29	down
LOC_Os06g49770	181.934	274.946	88.9226	-1.63256	1.52417e-30	1.37551e-29	down
LOC_Os01g42690	134.458	50.4345	218.481	2.11351	2.6795e-30	2.40287e-29	up
LOC_Os07g25390	237.23	342.808	131.651	-1.37832	2.90247e-30	2.59769e-29	down
LOC_Os01g66860	156.044	240.781	71.307	-1.7525	3.0497e-30	2.72838e-29	down
LOC_Os11g18940	247.74	355.03	140.45	-1.34076	3.12592e-30	2.79547e-29	down
LOC_Os06g46500	192.446	288.088	96.8035	-1.57343	3.32137e-30	2.96793e-29	down
LOC_Os03g37810	214.516	317.177	111.856	-1.50772	3.42349e-30	3.05798e-29	down
LOC_Os07g10660	425.678	280.745	570.611	1.02497	3.50889e-30	3.1318e-29	up
LOC_Os12g06660	66.27	125.996	6.54401	-4.24677	4.01194e-30	3.57656e-29	down
LOC_Os01g60330	227.318	336.037	118.599	-1.49533	4.09518e-30	3.64648e-29	down
LOC_Os01g29150	306.935	430.763	183.107	-1.22798	5.38838e-30	4.78485e-29	down
LOC_Os09g16950	113.82	188.031	39.6095	-2.23121	5.40339e-30	4.7963e-29	down
LOC_Os09g25060	172.544	268.222	76.8666	-1.79304	5.4314e-30	4.81928e-29	down
LOC_Os01g67630	222.783	323.532	122.034	-1.4091	7.08898e-30	6.26801e-29	down
LOC_Os01g01670	259.404	142.029	376.779	1.41069	8.52152e-30	7.51416e-29	up
LOC_Os01g03980	470.69	313.684	627.696	1.00033	8.78681e-30	7.74207e-29	up
LOC_Os04g51980	93.2848	160.944	25.6258	-2.62581	9.06862e-30	7.98728e-29	down
LOC_Os04g33370	346.581	489.583	203.58	-1.25844	9.09971e-30	8.00845e-29	down
LOC_Os05g05030	90.6614	154.155	27.1677	-2.51294	9.67206e-30	8.50557e-29	down
LOC_Os01g52780	200.846	296.068	105.624	-1.48597	9.94709e-30	8.74404e-29	down
LOC_Os05g50100	189.163	282.972	95.354	-1.57463	1.04078e-29	9.14546e-29	down
LOC_Os01g25560	313.802	444.219	183.386	-1.28658	1.10895e-29	9.72568e-29	down
LOC_Os06g09340	144.591	227.358	61.824	-1.87893	1.12575e-29	9.8692e-29	down
LOC_Os02g32650	187.563	279.713	95.4127	-1.55486	1.17984e-29	1.03354e-28	down
LOC_Os08g30210	476.452	641.232	311.671	-1.04432	1.23999e-29	1.08373e-28	down
LOC_Os04g52320	368.546	519.129	217.962	-1.2437	1.41592e-29	1.23416e-28	down
LOC_Os01g07570	165.467	251.267	79.6669	-1.66288	1.41842e-29	1.23586e-28	down
LOC_Os02g14840	445.352	602.43	288.273	-1.0593	1.43617e-29	1.25085e-28	down
LOC_Os04g43680	355.783	497.723	213.843	-1.22686	1.58436e-29	1.37781e-28	down
LOC_Os05g41760	330.483	459.095	201.871	-1.18329	1.70439e-29	1.48048e-28	down
LOC_Os03g04650	408.407	553.28	263.535	-1.06669	2.26809e-29	1.96262e-28	down
LOC_Os08g39330	97.6674	163.947	31.3876	-2.40114	2.27962e-29	1.97185e-28	down
LOC_Os04g45720	130.059	207.153	52.9655	-1.96225	2.53115e-29	2.18775e-28	down
LOC_Os11g03500	210.898	309.745	112.052	-1.46675	2.7713e-29	2.39259e-28	down
LOC_Os11g05614	88.1441	149.448	26.8399	-2.48652	3.25064e-29	2.8011e-28	down
LOC_Os02g16270	375.962	516.996	234.928	-1.13773	3.46318e-29	2.98198e-28	down
LOC_Os05g42360	236.654	340.128	133.179	-1.35594	4.94398e-29	4.23615e-28	down
LOC_Os07g09814	187.322	95.6058	279.037	1.5434	5.84374e-29	4.99955e-28	up
LOC_Os05g01940	432.195	581.788	282.603	-1.03999	5.85013e-29	5.00313e-28	down
LOC_Os09g23530	62.464	119.63	5.29766	-4.49099	7.57849e-29	6.45401e-28	down
LOC_Os08g24790	113.274	185.156	41.392	-2.14993	7.83834e-29	6.67082e-28	down
LOC_Os07g43800	148.037	227.637	68.4364	-1.73274	8.25491e-29	7.0227e-28	down
LOC_Os06g06900	111.275	179.86	42.6897	-2.07792	9.07406e-29	7.71669e-28	down
novel.486	244.908	352.359	137.457	-1.3563	9.77209e-29	8.30719e-28	down
LOC_Os06g11150	212.997	311.357	114.638	-1.44886	1.02244e-28	8.68846e-28	down
LOC_Os01g02890	109.029	178.769	39.2879	-2.17989	1.3436e-28	1.13665e-27	down
LOC_Os03g15080	136.929	213.489	60.3686	-1.82536	1.44525e-28	1.22037e-27	down
LOC_Os03g09070	206.392	303.754	109.031	-1.48626	1.47468e-28	1.24429e-27	down
LOC_Os01g03490	355.878	487.022	224.733	-1.12029	1.48402e-28	1.25172e-27	down
LOC_Os03g07180	275.481	153.458	397.505	1.37815	1.57835e-28	1.32881e-27	up
LOC_Os06g35630	141.638	222.01	61.2655	-1.84338	1.69739e-28	1.42691e-27	down
LOC_Os01g67740	127.149	203.142	51.1572	-1.98748	2.50218e-28	2.09262e-27	down
LOC_Os11g03660	135.985	213.014	58.9561	-1.85981	3.14467e-28	2.62318e-27	down
LOC_Os02g50910	80.8591	138.847	22.8712	-2.61406	3.79246e-28	3.15543e-27	down
LOC_Os04g11970	68.9287	123.585	14.2722	-3.11069	3.82073e-28	3.17779e-27	down
LOC_Os12g36890	86.2085	146.192	26.2251	-2.47761	3.86153e-28	3.20937e-27	down
LOC_Os12g41060	331.24	454.789	207.692	-1.13486	4.11643e-28	3.41872e-27	down
LOC_Os07g36630	326.408	450.392	202.424	-1.15302	4.18856e-28	3.47735e-27	down
LOC_Os11g30760	139.051	215.859	62.2427	-1.79027	5.08696e-28	4.21549e-27	down
LOC_Os04g41900	104.803	170.6	39.0056	-2.1315	5.19697e-28	4.30195e-27	down
LOC_Os05g30140	369.136	231.277	506.995	1.13059	5.92784e-28	4.88912e-27	up
LOC_Os10g33780	226.027	326.499	125.556	-1.37298	6.3243e-28	5.21044e-27	down
LOC_Os08g29600	262.07	371.478	152.662	-1.2798	6.33498e-28	5.21734e-27	down
LOC_Os01g59920	359.939	225.668	494.21	1.13172	6.99934e-28	5.75197e-27	up
LOC_Os03g14880	295.149	413.949	176.349	-1.22265	7.84376e-28	6.43426e-27	down
LOC_Os06g04850	83.9364	144.185	23.6881	-2.62385	8.32462e-28	6.81394e-27	down
LOC_Os06g49100	147.616	226.574	68.6577	-1.72907	8.51633e-28	6.96835e-27	down
LOC_Os12g43600	20362.7	11640.1	29085.3	1.32121	9.33862e-28	7.63018e-27	up
LOC_Os02g28170	301.369	424.75	177.987	-1.24862	9.69806e-28	7.92102e-27	down
LOC_Os01g04590	448.184	597.226	299.143	-1.00084	1.19945e-27	9.76858e-27	down
LOC_Os06g40150	232.631	336.223	129.039	-1.37563	1.21733e-27	9.9106e-27	down
LOC_Os05g51240	314.657	434.95	194.363	-1.15873	1.23468e-27	1.00482e-26	down
LOC_Os12g41230	292.657	410.538	174.776	-1.24166	1.2404e-27	1.00912e-26	down
LOC_Os01g67100	90.6857	152.504	28.8673	-2.41072	1.34222e-27	1.09e-26	down
LOC_Os04g55640	352.223	476.606	227.84	-1.06261	1.43019e-27	1.16061e-26	down
LOC_Os10g09870	92.3103	154.325	30.2954	-2.33873	1.45507e-27	1.18038e-26	down
LOC_Os03g17350	213.072	308.848	117.296	-1.3964	1.70136e-27	1.3787e-26	down
LOC_Os03g12900	289.157	405.087	173.226	-1.22318	1.83367e-27	1.48485e-26	down
LOC_Os12g06220	306.002	421.754	190.25	-1.14954	2.10202e-27	1.69973e-26	down
LOC_Os06g47770	189.385	280.692	98.0785	-1.51731	2.66932e-27	2.15386e-26	down
LOC_Os02g12660	283.167	171.247	395.088	1.20334	2.7788e-27	2.2406e-26	up
LOC_Os12g41910	217.792	314.13	121.453	-1.36705	3.01234e-27	2.42719e-26	down
LOC_Os10g40640	135.987	210.493	61.4809	-1.77972	3.55393e-27	2.85648e-26	down
LOC_Os08g40170	89.651	149.097	30.2045	-2.30136	4.33998e-27	3.48088e-26	down
LOC_Os09g27060	82.1008	139.086	25.1152	-2.47679	4.3598e-27	3.4943e-26	down
LOC_Os02g37280	68.9821	121.226	16.7386	-2.86408	5.1781e-27	4.13993e-26	down
LOC_Os10g01570	66.4501	119.957	12.9433	-3.20867	5.87554e-27	4.69093e-26	down
LOC_Os09g11250	303.404	185.087	421.722	1.1911	6.95151e-27	5.53828e-26	up
LOC_Os07g03730	270.584	384.266	156.902	-1.30333	7.49342e-27	5.95956e-26	down
LOC_Os05g25680	235.529	136.658	334.401	1.29135	8.0725e-27	6.41562e-26	up
LOC_Os04g22660	151.558	66.569	236.548	1.83216	8.51201e-27	6.7531e-26	up
LOC_Os01g66840	104.415	169.497	39.3324	-2.11742	8.79033e-27	6.9666e-26	down
LOC_Os02g53400	186.572	94.8574	278.287	1.55482	1.06312e-26	8.4079e-26	up
LOC_Os07g07340	295.769	409.234	182.304	-1.16605	1.10358e-26	8.72488e-26	down
LOC_Os07g12100	65.2557	116.552	13.9599	-3.03393	1.17057e-26	9.24804e-26	down
LOC_Os07g47210	156.559	236.6	76.5172	-1.62893	1.22683e-26	9.68734e-26	down
LOC_Os04g53994	364.155	236.242	492.067	1.05636	1.22702e-26	9.68734e-26	up
LOC_Os01g69290	171.495	256.204	86.7847	-1.56157	1.27902e-26	1.00908e-25	down
LOC_Os01g55280	292.411	402.603	182.218	-1.14186	1.33647e-26	1.05258e-25	down
LOC_Os03g01270	219.476	320.627	118.325	-1.43115	1.3572e-26	1.06854e-25	down
LOC_Os03g01990	391.299	526.234	256.364	-1.03818	1.41526e-26	1.11386e-25	down
LOC_Os02g48880	372.192	504.294	240.09	-1.07043	1.42372e-26	1.12013e-25	down
LOC_Os05g33030	122.209	192.968	51.4512	-1.89349	1.55316e-26	1.22028e-25	down
LOC_Os06g21530	443.176	290.962	595.389	1.03299	1.71241e-26	1.34214e-25	up
LOC_Os06g28630	297.322	408.718	185.926	-1.14097	1.86466e-26	1.45896e-25	down
LOC_Os04g56060	265.996	371.273	160.718	-1.20513	1.89608e-26	1.48303e-25	down
LOC_Os03g19080	87.7856	146.831	28.7405	-2.37011	1.94526e-26	1.52097e-25	down
LOC_Os02g52130	409.664	555.016	264.311	-1.0664	1.96934e-26	1.53927e-25	down
LOC_Os11g01340	307.553	422.4	192.705	-1.13468	2.12041e-26	1.65433e-25	down
LOC_Os01g37460	62.0387	111.29	12.7878	-3.13548	2.36375e-26	1.83869e-25	down
LOC_Os05g32420	142.718	217.523	67.9137	-1.6806	2.46007e-26	1.91099e-25	down
LOC_Os01g10850	232.272	329.77	134.774	-1.29536	2.49994e-26	1.94064e-25	down
LOC_Os03g10800	133.343	206.263	60.4225	-1.77498	2.80821e-26	2.1777e-25	down
LOC_Os10g35460	290.611	399.578	181.645	-1.14061	3.09674e-26	2.39736e-25	down
LOC_Os09g10010	195.007	101.141	288.872	1.51308	3.44841e-26	2.66506e-25	up
LOC_Os10g04270	179.02	262.707	95.3336	-1.46452	3.53825e-26	2.73356e-25	down
LOC_Os03g04310	96.7362	159.061	34.4113	-2.20249	4.17158e-26	3.21412e-25	down
LOC_Os12g08700	100.701	37.6188	163.783	2.11688	4.35617e-26	3.35292e-25	up
LOC_Os02g48690	141.556	216.846	66.2653	-1.70724	4.60737e-26	3.54267e-25	down
LOC_Os01g62630	350.309	483.767	216.85	-1.16069	4.95683e-26	3.80621e-25	down
LOC_Os06g39960	271.014	379.366	162.662	-1.22594	5.15152e-26	3.95304e-25	down
LOC_Os03g06170	116.714	186.515	46.9131	-1.97841	5.3322e-26	4.0903e-25	down
LOC_Os04g28260	158.651	238.968	78.3343	-1.60324	5.82076e-26	4.45454e-25	down
LOC_Os02g04550	168.724	251.938	85.511	-1.56599	6.50582e-26	4.9721e-25	down
LOC_Os10g26110	58.5866	107.165	10.0081	-3.42464	6.72684e-26	5.13756e-25	down
LOC_Os01g12190	356.067	479.192	232.942	-1.03675	6.81844e-26	5.20577e-25	down
novel.369	379.212	513.133	245.291	-1.06162	6.8434e-26	5.22306e-25	down
LOC_Os02g16540	324.038	441.775	206.301	-1.10377	7.39247e-26	5.63078e-25	down
novel.919	154.638	77.0932	232.182	1.58778	7.94976e-26	6.04107e-25	up
LOC_Os06g03380	80.0438	134.89	25.1977	-2.43089	8.76079e-26	6.64848e-25	down
LOC_Os01g50170	128.738	199.723	57.7536	-1.79389	1.11138e-25	8.40325e-25	down
LOC_Os03g43440	146.554	221.48	71.6289	-1.63413	1.12905e-25	8.53117e-25	down
LOC_Os05g35340	365.919	491.428	240.409	-1.03587	1.22384e-25	9.23209e-25	down
LOC_Os02g57840	102.891	39.5947	166.187	2.07675	1.23571e-25	9.31538e-25	up
LOC_Os05g31760	241.111	340.677	141.545	-1.26465	1.27087e-25	9.57728e-25	down
novel.893	62.7315	12.2385	113.225	3.20243	1.3058e-25	9.83724e-25	up
LOC_Os01g11150	83.5955	140.532	26.6592	-2.41328	1.35287e-25	1.01851e-24	down
LOC_Os05g48810	209.695	119.155	300.234	1.33327	1.48133e-25	1.11338e-24	up
LOC_Os05g48150	298.461	410.464	186.457	-1.14455	1.48287e-25	1.11416e-24	down
LOC_Os07g48610	343.805	466.056	221.554	-1.07697	1.49004e-25	1.11918e-24	down
LOC_Os09g07180	322.601	205.468	439.734	1.09681	1.55854e-25	1.16908e-24	up
LOC_Os02g55410	108.188	172.081	44.295	-1.9673	1.61468e-25	1.21e-24	down
LOC_Os05g30970	164.882	250.631	79.1334	-1.68029	1.71986e-25	1.28712e-24	down
LOC_Os09g25070	154.899	231.894	77.9049	-1.57072	1.9665e-25	1.46976e-24	down
LOC_Os12g40860	78.6394	133.348	23.931	-2.47672	2.08605e-25	1.55655e-24	down
LOC_Os06g40850	183.008	270.316	95.7006	-1.49159	2.12049e-25	1.58121e-24	down
LOC_Os07g35140	219.64	313.947	125.334	-1.32512	2.36415e-25	1.76059e-24	down
LOC_Os04g46280	249.87	348.885	150.855	-1.21117	2.4211e-25	1.80182e-24	down
LOC_Os01g19630	248.9	145.094	352.705	1.27895	2.42792e-25	1.80512e-24	up
LOC_Os01g03950	158.443	238.305	78.5808	-1.61333	2.68825e-25	1.99605e-24	down
LOC_Os09g26999	221.671	314.863	128.478	-1.29859	2.91648e-25	2.16269e-24	down
LOC_Os03g62040	311.364	197.69	425.037	1.10309	3.75525e-25	2.7729e-24	up
LOC_Os06g06360	80.533	135.567	25.499	-2.39204	4.14545e-25	3.05606e-24	down
LOC_Os07g43950	331.45	213.716	449.183	1.07064	4.51554e-25	3.32566e-24	up
LOC_Os06g18790	281.643	396.482	166.803	-1.24367	4.75123e-25	3.4947e-24	down
LOC_Os06g14350	67.0121	116.745	17.2792	-2.75613	5.22924e-25	3.84132e-24	down
LOC_Os01g04640	175.947	256.726	95.1675	-1.43535	7.93325e-25	5.79018e-24	down
LOC_Os09g33850	261.227	159.701	362.754	1.18183	8.01011e-25	5.8444e-24	up
LOC_Os01g50410	102.812	164.184	41.4399	-1.99125	8.05115e-25	5.87245e-24	down
LOC_Os06g01290	265.441	162.64	368.241	1.17635	8.62291e-25	6.28142e-24	up
LOC_Os01g72270	63.8055	15.5785	112.033	2.84985	8.91618e-25	6.48673e-24	up
LOC_Os07g38460	248.017	345.551	150.484	-1.20194	9.02369e-25	6.56284e-24	down
LOC_Os04g51970	284.052	389.491	178.614	-1.12142	9.95451e-25	7.22362e-24	down
LOC_Os07g03120	77.2502	132.132	22.3686	-2.5526	9.95984e-25	7.22518e-24	down
LOC_Os01g63540	70.8152	121.851	19.7792	-2.61348	1.00379e-24	7.27949e-24	down
LOC_Os10g35580	60.7682	107.74	13.7961	-2.97844	1.01002e-24	7.32229e-24	down
LOC_Os05g07820	156.167	235.22	77.1144	-1.62354	1.10495e-24	7.9978e-24	down
LOC_Os11g32100	243.635	341.381	145.89	-1.22575	1.10668e-24	8.00774e-24	down
LOC_Os01g36390	101.044	162.572	39.5165	-2.04656	1.14147e-24	8.25684e-24	down
LOC_Os08g34240	344.795	461.432	228.159	-1.01586	1.18855e-24	8.58922e-24	down
LOC_Os07g05740	310.413	420.727	200.1	-1.07709	1.34361e-24	9.68819e-24	down
LOC_Os04g56390	87.7163	144.229	31.2032	-2.19551	1.40574e-24	1.01137e-23	down
LOC_Os03g53920	144.063	219.541	68.5848	-1.68756	1.57224e-24	1.12973e-23	down
LOC_Os05g41750	83.4099	137.992	28.8279	-2.2665	1.62951e-24	1.17051e-23	down
LOC_Os01g29330	51.6741	97.3628	5.98543	-4.02374	1.66481e-24	1.19511e-23	down
LOC_Os03g08840	182.753	273.083	92.4233	-1.56705	1.80891e-24	1.29773e-23	down
LOC_Os05g40050	137.506	209.366	65.6456	-1.67064	1.92009e-24	1.37619e-23	down
LOC_Os07g41050	294.386	404.598	184.174	-1.12966	2.02088e-24	1.44797e-23	down
LOC_Os03g37320	214.915	124.514	305.316	1.29125	2.09412e-24	1.49997e-23	up
LOC_Os03g62670	144.788	71.9965	217.58	1.59823	2.17495e-24	1.5559e-23	up
LOC_Os03g44780	335.915	220.193	451.636	1.03866	2.24615e-24	1.60633e-23	up
LOC_Os03g13570	271.976	378.016	165.936	-1.18688	2.35864e-24	1.68572e-23	down
LOC_Os09g25570	235.619	338.133	133.105	-1.33429	2.41964e-24	1.72823e-23	down
LOC_Os06g46340	151.322	226.767	75.8764	-1.58026	2.58771e-24	1.84421e-23	down
LOC_Os07g32390	153.084	229.366	76.8012	-1.58155	2.6689e-24	1.89969e-23	down
LOC_Os12g10750	330.95	212.325	449.574	1.07818	2.7503e-24	1.95517e-23	up
LOC_Os09g35940	203.615	115.774	291.455	1.3323	2.78049e-24	1.97602e-23	up
LOC_Os05g43880	66.1869	114.947	17.4264	-2.73015	2.84942e-24	2.02437e-23	down
LOC_Os06g50930	99.2448	38.9289	159.561	2.04252	3.32411e-24	2.35425e-23	up
LOC_Os01g45700	308.987	418.414	199.559	-1.06585	3.35121e-24	2.3727e-23	down
LOC_Os09g32320	243.777	343.667	143.887	-1.25098	3.57694e-24	2.52937e-23	down
novel.1047	103.883	165.328	42.4376	-1.9662	3.66565e-24	2.59048e-23	down
LOC_Os11g42970	221.688	314.865	128.512	-1.30208	3.7511e-24	2.64922e-23	down
LOC_Os01g09580	58.1141	103.772	12.4565	-3.07209	3.88987e-24	2.74467e-23	down
LOC_Os03g44890	81.0046	134.563	27.4462	-2.28761	4.11959e-24	2.90315e-23	down
LOC_Os03g17760	125.22	192.911	57.5291	-1.75591	4.36844e-24	3.07661e-23	down
novel.291	240.603	336.437	144.768	-1.2193	4.48344e-24	3.15662e-23	down
LOC_Os03g57450	285.096	396.021	174.171	-1.18135	4.51277e-24	3.17628e-23	down
LOC_Os03g26910	347.447	469.14	225.754	-1.06207	4.73743e-24	3.33338e-23	down
LOC_Os05g01140	220.291	311.622	128.96	-1.2727	5.874e-24	4.11906e-23	down
LOC_Os02g43740	221.433	314.497	128.369	-1.30143	6.69118e-24	4.68341e-23	down
LOC_Os02g34410	146.864	224.899	68.8299	-1.70521	6.76001e-24	4.73013e-23	down
LOC_Os01g11600	146.617	70.9263	222.308	1.64506	6.85209e-24	4.79161e-23	up
LOC_Os08g34550	401.526	542.034	261.017	-1.05721	6.93559e-24	4.84851e-23	down
LOC_Os10g40584	196.695	283.964	109.425	-1.38536	7.60919e-24	5.30634e-23	down
LOC_Os03g18110	235.141	329.654	140.627	-1.22494	8.04087e-24	5.60393e-23	down
LOC_Os04g59150	341.97	458.366	225.574	-1.01841	9.23296e-24	6.41897e-23	down
LOC_Os05g10414	1883.19	1141.29	2625.09	1.20226	9.42264e-24	6.54884e-23	up
LOC_Os02g38840	275.132	381.206	169.058	-1.17588	9.75809e-24	6.76954e-23	down
LOC_Os11g34720	227.5	322.95	132.049	-1.29325	1.01352e-23	7.0269e-23	down
LOC_Os10g36703	421.46	568.569	274.351	-1.04597	1.04909e-23	7.26458e-23	down
LOC_Os02g49160	322.366	210.898	433.834	1.03876	1.07578e-23	7.44488e-23	up
LOC_Os01g53640	285.981	390.121	181.84	-1.10347	1.12691e-23	7.77978e-23	down
LOC_Os05g38000	311.345	423.824	198.866	-1.09558	1.22553e-23	8.44775e-23	down
LOC_Os06g06550	85.9841	142.395	29.5728	-2.24503	1.52353e-23	1.04733e-22	down
LOC_Os03g52650	73.6464	124.525	22.7683	-2.44186	1.52787e-23	1.05e-22	down
LOC_Os06g51110	65.544	113.249	17.8391	-2.70042	1.5293e-23	1.05066e-22	down
LOC_Os01g08520	201.842	288.226	115.458	-1.31284	1.52984e-23	1.05071e-22	down
LOC_Os05g45810	323.506	433.027	213.985	-1.02032	1.7652e-23	1.2098e-22	down
LOC_Os09g23560	52.4442	96.0538	8.83463	-3.42277	2.01305e-23	1.37758e-22	down
LOC_Os11g07912	158.503	233.977	83.0291	-1.49252	2.06578e-23	1.41324e-22	down
LOC_Os11g44680	258.672	357.595	159.748	-1.16084	2.07624e-23	1.41997e-22	down
LOC_Os12g38770	102.817	42.6748	162.958	1.92975	2.10904e-23	1.4411e-22	up
LOC_Os01g57599	167.532	89.9692	245.095	1.44379	2.34736e-23	1.6025e-22	up
novel.827	264.077	157.464	370.69	1.23097	2.43852e-23	1.66273e-22	up
LOC_Os03g51970	69.4064	118.208	20.6045	-2.50237	2.73957e-23	1.86577e-22	down
LOC_Os01g60600	55.0994	99.8119	10.387	-3.23609	2.9114e-23	1.98101e-22	down
LOC_Os02g11040	90.7526	146.179	35.3264	-2.04119	2.91998e-23	1.98625e-22	down
LOC_Os11g04830	90.809	147.491	34.1267	-2.10669	2.9342e-23	1.99532e-22	down
LOC_Os01g71810	79.7137	131.461	27.9667	-2.24649	3.1527e-23	2.14263e-22	down
LOC_Os01g07240	322.152	432.733	211.571	-1.03256	3.15378e-23	2.14272e-22	down
LOC_Os03g46150	95.3339	151.94	38.7282	-1.97624	3.15674e-23	2.14409e-22	down
LOC_Os08g39270	148.967	222.187	75.7472	-1.56357	3.35629e-23	2.27562e-22	down
LOC_Os01g56940	160.162	235.242	85.0817	-1.46722	3.42533e-23	2.32097e-22	down
LOC_Os02g43970	132.28	201.129	63.4296	-1.66885	3.7714e-23	2.55089e-22	down
LOC_Os03g11910	318.735	202.415	435.055	1.09923	4.24113e-23	2.85754e-22	up
LOC_Os04g07890	166.716	245.661	87.7714	-1.47534	4.26379e-23	2.87195e-22	down
LOC_Os01g66020	224.047	131.784	316.311	1.26415	4.44311e-23	2.99008e-22	up
LOC_Os04g50960	62.4801	108.03	16.93	-2.67151	4.94557e-23	3.32231e-22	down
LOC_Os07g04940	113.081	175.978	50.1837	-1.81616	6.15552e-23	4.1205e-22	down
LOC_Os01g22560	95.069	152.808	37.3299	-2.04501	6.7358e-23	4.50097e-22	down
LOC_Os03g56820	190.083	275.006	105.16	-1.37683	9.15615e-23	6.09676e-22	down
LOC_Os03g21660	116.902	54.2884	179.515	1.72392	9.20437e-23	6.12707e-22	up
LOC_Os09g38710	87.3012	142.38	32.2223	-2.13171	9.52645e-23	6.33404e-22	down
LOC_Os03g02290	84.6403	137.261	32.0191	-2.10247	1.11869e-22	7.41634e-22	down
LOC_Os05g06510	278.351	178.61	378.093	1.08071	1.15075e-22	7.61774e-22	up
LOC_Os06g12250	145.298	215.332	75.264	-1.51766	1.22766e-22	8.11977e-22	down
LOC_Os01g54340	216.411	308.097	124.725	-1.3108	1.26238e-22	8.34213e-22	down
LOC_Os02g03820	284.64	181.341	387.94	1.10057	1.2767e-22	8.43429e-22	up
LOC_Os03g44380	191.809	275.06	108.557	-1.33761	1.2906e-22	8.52121e-22	down
LOC_Os06g08790	67.3007	114.939	19.662	-2.56635	1.54506e-22	1.01776e-21	down
LOC_Os07g12240	61.1216	106.761	15.4826	-2.77491	1.67207e-22	1.09919e-21	down
LOC_Os06g47600	102.397	160.329	44.4649	-1.85528	1.67435e-22	1.10037e-21	down
LOC_Os07g42610	276.167	173.825	378.509	1.12573	1.69452e-22	1.11298e-21	up
LOC_Os03g59200	306.331	413.457	199.205	-1.06029	1.79235e-22	1.17554e-21	down
LOC_Os07g39850	158.827	234.423	83.2304	-1.50452	1.84639e-22	1.20993e-21	down
LOC_Os10g37400	376.469	514.667	238.272	-1.10346	1.88844e-22	1.23713e-21	down
LOC_Os08g01100	59.4476	103.423	15.4719	-2.72896	2.03472e-22	1.33104e-21	down
LOC_Os07g35330	302.626	199.932	405.32	1.02035	2.17786e-22	1.42263e-21	up
novel.469	215.269	127.845	302.693	1.24547	2.28025e-22	1.48823e-21	up
LOC_Os03g18490	75.3894	25.101	125.678	2.32333	2.51704e-22	1.64041e-21	up
LOC_Os11g20360	278.57	376.699	180.442	-1.06565	2.5263e-22	1.64597e-21	down
LOC_Os09g25000	189.332	270.149	108.516	-1.32159	2.57536e-22	1.67745e-21	down
LOC_Os02g53350	238.052	147.427	328.676	1.15877	2.62076e-22	1.70556e-21	up
LOC_Os03g05270	232.326	322.219	142.433	-1.17835	2.94926e-22	1.9166e-21	down
LOC_Os07g33910	90.3671	36.2445	144.49	1.99939	3.05253e-22	1.98314e-21	up
novel.126	178.942	100.777	257.107	1.35242	3.72346e-22	2.41212e-21	up
LOC_Os03g28260	85.8217	139.431	32.2129	-2.12391	3.75154e-22	2.42962e-21	down
LOC_Os06g35940	68.0073	114.731	21.2839	-2.42983	3.9019e-22	2.52484e-21	down
LOC_Os02g51680	62.0487	106.756	17.3414	-2.60364	5.05149e-22	3.2548e-21	down
LOC_Os10g05600	92.0099	148.612	35.4079	-2.0737	5.41854e-22	3.48734e-21	down
LOC_Os01g64380	129.697	195.92	63.4734	-1.62607	5.52143e-22	3.55255e-21	down
LOC_Os05g39260	94.8592	149.881	39.8371	-1.91862	5.74734e-22	3.69581e-21	down
LOC_Os11g36030	106.096	165.516	46.6764	-1.82891	5.99696e-22	3.85196e-21	down
LOC_Os03g59774	124.746	190.383	59.108	-1.70646	6.02e-22	3.86567e-21	down
LOC_Os01g74370	53.2719	95.3433	11.2005	-3.07727	6.47226e-22	4.15256e-21	down
LOC_Os11g03290	74.9019	123.414	26.3902	-2.22929	7.07715e-22	4.53425e-21	down
LOC_Os12g17160	80.9717	30.1587	131.785	2.1251	7.12639e-22	4.56451e-21	up
LOC_Os10g42040	67.4669	114.275	20.6583	-2.45255	8.19948e-22	5.24e-21	down
LOC_Os06g09990	86.0685	139.292	32.8454	-2.07176	8.65075e-22	5.52374e-21	down
LOC_Os03g11380	137.779	205.317	70.2402	-1.5484	9.26927e-22	5.91036e-21	down
LOC_Os02g49310	292.828	394.033	191.623	-1.03642	9.65668e-22	6.1522e-21	down
LOC_Os12g24550	150.553	220.668	80.4383	-1.45986	1.06126e-21	6.75555e-21	down
LOC_Os04g26380	96.6512	37.6327	155.67	2.04136	1.08719e-21	6.91673e-21	up
LOC_Os02g51280	200.764	286.641	114.886	-1.32729	1.08794e-21	6.91953e-21	down
LOC_Os01g15970	174.581	250.531	98.6315	-1.34993	1.09607e-21	6.96932e-21	down
LOC_Os11g46880	48.3409	93.3902	3.29169	-4.8131	1.11567e-21	7.08996e-21	down
LOC_Os06g45040	206.77	292.248	121.292	-1.26332	1.13682e-21	7.22236e-21	down
LOC_Os04g41810	320.186	428.445	211.928	-1.01554	1.25659e-21	7.97879e-21	down
LOC_Os01g72910	189.029	267.789	110.27	-1.27862	1.26174e-21	8.00925e-21	down
LOC_Os06g39370	116.876	54.9588	178.793	1.69981	1.32413e-21	8.39825e-21	up
LOC_Os02g50000	93.8487	148.612	39.0858	-1.92334	1.34089e-21	8.49982e-21	down
LOC_Os07g42310	218.787	305.505	132.069	-1.20793	1.48526e-21	9.39919e-21	down
LOC_Os01g54300	153.554	224.979	82.1296	-1.44994	1.49726e-21	9.47253e-21	down
LOC_Os04g39110	142.961	211.798	74.1241	-1.50978	1.6444e-21	1.03889e-20	down
LOC_Os06g09940	105.621	164.131	47.1106	-1.81241	1.65887e-21	1.04745e-20	down
LOC_Os07g01490	81.024	131.185	30.8626	-2.09625	1.86962e-21	1.17725e-20	down
LOC_Os01g21310	177.393	253.814	100.971	-1.33709	2.05117e-21	1.28904e-20	down
LOC_Os02g38320	90.5344	144.091	36.9782	-1.96507	2.15466e-21	1.35148e-20	down
LOC_Os01g12640	179.083	257.942	100.224	-1.35678	2.26383e-21	1.41722e-20	down
LOC_Os08g37970	61.1581	105.202	17.1141	-2.60931	2.42397e-21	1.51372e-20	down
LOC_Os01g46350	227.088	312.891	141.285	-1.15095	2.6296e-21	1.63897e-20	down
LOC_Os04g50790	243.145	336.766	149.524	-1.17062	2.76005e-21	1.71886e-20	down
LOC_Os01g36460	285.95	384.175	187.725	-1.0312	2.78291e-21	1.73167e-20	down
LOC_Os10g05660	136.775	205.339	68.2114	-1.59334	3.1281e-21	1.94115e-20	down
LOC_Os01g37000	47.2327	6.89499	87.5704	3.66169	3.21839e-21	1.99609e-20	up
LOC_Os02g11790	63.374	18.6159	108.132	2.54007	3.44425e-21	2.135e-20	up
LOC_Os11g40200	249.441	156.2	342.682	1.13163	3.78103e-21	2.33866e-20	up
LOC_Os10g29650	60.7779	17.9222	103.634	2.53588	3.95183e-21	2.4423e-20	up
LOC_Os05g35480	108.547	166.522	50.5723	-1.72624	4.02511e-21	2.48624e-20	down
LOC_Os06g16350	244.503	333.786	155.219	-1.1079	4.16371e-21	2.56905e-20	down
LOC_Os01g11350	164.243	239.366	89.1196	-1.42199	4.16506e-21	2.56919e-20	down
LOC_Os03g55920	212.883	125.675	300.091	1.25576	4.38868e-21	2.70639e-20	up
LOC_Os01g49320	206.442	290.862	122.023	-1.25536	4.75566e-21	2.92952e-20	down
LOC_Os04g44150	84.5364	136.805	32.2678	-2.08438	4.91883e-21	3.02921e-20	down
LOC_Os04g35140	308.743	205.031	412.455	1.00863	5.04385e-21	3.10199e-20	up
LOC_Os05g01230	133.974	199.082	68.8647	-1.53172	5.40289e-21	3.31921e-20	down
LOC_Os02g49950	270.767	368.536	172.998	-1.08877	5.48477e-21	3.36678e-20	down
LOC_Os02g30800	85.4727	136.113	34.8324	-1.96393	5.87676e-21	3.60156e-20	down
LOC_Os01g07560	186.401	263.161	109.642	-1.26535	6.30989e-21	3.86179e-20	down
LOC_Os07g04960	62.1443	105.322	18.967	-2.49303	6.96758e-21	4.25742e-20	down
LOC_Os12g03150	187.189	264.647	109.732	-1.27321	7.00373e-21	4.27836e-20	down
LOC_Os08g06540	81.1972	31.3323	131.062	2.0588	7.21043e-21	4.40108e-20	up
LOC_Os01g67190	272.659	366.399	178.92	-1.03106	7.87809e-21	4.80472e-20	down
LOC_Os12g43810	149.373	81.5501	217.195	1.41285	9.42943e-21	5.73085e-20	up
LOC_Os08g02250	84.1916	135.42	32.9629	-2.03993	9.66902e-21	5.87332e-20	down
LOC_Os02g01220	117.051	56.1716	177.931	1.65826	1.03248e-20	6.26162e-20	up
LOC_Os03g38800	61.2824	104.903	17.662	-2.55284	1.07022e-20	6.48702e-20	down
LOC_Os11g05410	173.795	98.0565	249.534	1.34649	1.1166e-20	6.76454e-20	up
LOC_Os03g53360	287.919	386.179	189.659	-1.02328	1.20551e-20	7.29148e-20	down
LOC_Os09g38910	101.466	156.715	46.216	-1.76129	1.20771e-20	7.30286e-20	down
LOC_Os06g13720	179.554	101.825	257.283	1.33833	1.23957e-20	7.48754e-20	up
LOC_Os03g51230	233.651	319.636	147.666	-1.11242	1.2906e-20	7.78957e-20	down
LOC_Os09g27230	187.824	266.088	109.559	-1.28863	1.32084e-20	7.96361e-20	down
LOC_Os04g57800	252.754	344.946	160.562	-1.10327	1.36373e-20	8.21784e-20	down
LOC_Os05g24780	290.878	388.72	193.036	-1.00978	1.4574e-20	8.773e-20	down
LOC_Os12g40500	288.788	190.508	387.069	1.02052	1.54425e-20	9.28347e-20	up
LOC_Os05g38264	204.613	124.444	284.781	1.19496	1.63194e-20	9.80287e-20	up
LOC_Os06g48210	174.696	100.016	249.377	1.32141	1.83358e-20	1.0985e-19	up
LOC_Os05g14590	95.1342	148.257	42.0116	-1.82883	1.84716e-20	1.10606e-19	down
LOC_Os01g70390	134.391	198.55	70.2317	-1.49122	2.04257e-20	1.22113e-19	down
LOC_Os08g07080	52.3798	91.9645	12.7951	-2.85968	2.1913e-20	1.30833e-19	down
LOC_Os01g68720	63.6837	107.055	20.3126	-2.38178	2.22259e-20	1.32631e-19	down
LOC_Os03g21730	226.735	310.775	142.695	-1.12245	2.31215e-20	1.37939e-19	down
LOC_Os05g41390	83.2506	132.666	33.8348	-1.96818	2.35271e-20	1.40298e-19	down
LOC_Os02g46650	290.755	388.614	192.896	-1.01368	2.35293e-20	1.40298e-19	down
LOC_Os03g61160	47.0758	2.6648	91.4868	5.10696	2.39029e-20	1.42451e-19	up
LOC_Os02g55540	126.549	63.8306	189.267	1.56285	2.41174e-20	1.43692e-19	up
LOC_Os09g39190	98.9123	153.139	44.686	-1.77322	2.59302e-20	1.54411e-19	down
LOC_Os04g41630	172.729	99.2182	246.241	1.31191	2.67977e-20	1.59535e-19	up
LOC_Os03g18970	146.135	212.779	79.4898	-1.41656	2.79003e-20	1.66056e-19	down
LOC_Os04g58890	185.556	262.545	108.566	-1.26525	3.08509e-20	1.83185e-19	down
LOC_Os10g38470	219.379	136.227	302.531	1.15215	3.2367e-20	1.92137e-19	up
LOC_Os03g05880	156.576	225.326	87.8266	-1.35621	3.45202e-20	2.04759e-19	down
novel.704	76.5532	27.9869	125.12	2.16817	3.59566e-20	2.13223e-19	up
novel.133	82.0457	132.254	31.8371	-2.04286	3.69514e-20	2.18893e-19	down
LOC_Os06g14540	62.4643	104.642	20.2863	-2.36715	3.79305e-20	2.24635e-19	down
LOC_Os02g42190	80.6984	130.564	30.8326	-2.06838	3.8108e-20	2.25568e-19	down
LOC_Os05g25540	108.44	165.638	51.2432	-1.69225	3.98494e-20	2.35692e-19	down
LOC_Os04g54300	225.291	140.606	309.977	1.14291	4.07118e-20	2.4073e-19	up
LOC_Os01g72300	253.597	345.009	162.184	-1.09209	4.59324e-20	2.71246e-19	down
LOC_Os04g32820	106.106	162.841	49.3702	-1.72491	4.74662e-20	2.80158e-19	down
LOC_Os02g46270	246.984	334.39	159.577	-1.06389	4.75299e-20	2.80461e-19	down
LOC_Os02g43790	114.124	172.884	55.3639	-1.63993	5.09601e-20	3.00234e-19	down
LOC_Os05g07764	128.154	189.265	67.0429	-1.49506	5.26298e-20	3.09749e-19	down
LOC_Os09g12720	144.532	211.468	77.595	-1.44287	5.35779e-20	3.15248e-19	down
LOC_Os10g40550	152.399	221.066	83.7325	-1.3961	5.56543e-20	3.27126e-19	down
LOC_Os08g31060	44.1446	80.9831	7.30601	-3.52535	6.08192e-20	3.5693e-19	down
LOC_Os11g38920	190.365	266.26	114.47	-1.21295	6.74694e-20	3.95344e-19	down
LOC_Os01g19220	261.338	351.734	170.942	-1.03916	6.75159e-20	3.95515e-19	down
LOC_Os06g09880	273.341	180.482	366.199	1.01939	6.90451e-20	4.04056e-19	up
LOC_Os01g07300	230.428	141.767	319.09	1.16626	7.5833e-20	4.43437e-19	up
LOC_Os02g26430	56.1465	96.7662	15.5268	-2.60943	8.03692e-20	4.69841e-19	down
LOC_Os02g55130	114.588	172.499	56.6762	-1.61268	8.0586e-20	4.70987e-19	down
LOC_Os02g48730	132.856	195.772	69.94	-1.49129	8.70865e-20	5.08195e-19	down
LOC_Os09g13590	49.5384	11.1747	87.9021	2.96275	8.80781e-20	5.1385e-19	up
LOC_Os04g30200	222.049	136.985	307.114	1.167	9.39848e-20	5.47887e-19	up
LOC_Os11g31090	270.323	363.8	176.847	-1.04062	9.47829e-20	5.52256e-19	down
LOC_Os04g51800	197.407	120.052	274.763	1.19324	1.01739e-19	5.92027e-19	up
LOC_Os04g33920	211.506	0.661689	422.35	9.31514	1.02173e-19	5.9425e-19	up
LOC_Os04g46320	160.765	235.694	85.8367	-1.46985	1.02916e-19	5.98264e-19	down
LOC_Os09g35890	170.021	240.616	99.4257	-1.27458	1.1643e-19	6.7578e-19	down
LOC_Os05g38480	68.254	111.904	24.6043	-2.18548	1.16995e-19	6.78712e-19	down
LOC_Os06g30370	177.905	101.503	254.307	1.32301	1.35013e-19	7.81242e-19	up
LOC_Os02g15820	128.678	189.539	67.8156	-1.48677	1.40414e-19	8.11466e-19	down
novel.1060	52.3811	13.4653	91.2968	2.75111	1.57479e-19	9.08466e-19	up
LOC_Os12g01370	215.553	295.89	135.216	-1.13548	1.64519e-19	9.47631e-19	down
LOC_Os05g45410	223.797	306.845	140.748	-1.11699	1.66399e-19	9.57734e-19	down
LOC_Os02g32615	61.9767	20.0002	103.953	2.3849	1.83907e-19	1.05743e-18	up
LOC_Os04g07280	146.645	219.283	74.0063	-1.55945	1.86125e-19	1.06992e-18	down
LOC_Os03g21160	71.7596	117.099	26.4199	-2.14061	1.98104e-19	1.13762e-18	down
LOC_Os10g41130	159.7	227.476	91.9235	-1.3088	2.25629e-19	1.29405e-18	down
LOC_Os06g23350	58.3408	17.9305	98.7511	2.46228	2.45071e-19	1.40236e-18	up
LOC_Os07g31070	44.3339	80.4361	8.2318	-3.32498	2.47056e-19	1.41301e-18	down
LOC_Os11g23080	72.2544	116.725	27.7837	-2.07688	2.70309e-19	1.54328e-18	down
LOC_Os04g58720	144.424	209.443	79.4047	-1.402	2.79857e-19	1.59619e-18	down
LOC_Os01g65440	209.342	290.103	128.58	-1.17105	3.01296e-19	1.71631e-18	down
LOC_Os06g02960	251.514	340.704	162.325	-1.06207	3.05259e-19	1.73802e-18	down
LOC_Os07g40460	234.981	151.006	318.957	1.07905	3.56369e-19	2.02343e-18	up
LOC_Os05g05020	209.674	290.711	128.636	-1.1765	3.81094e-19	2.15896e-18	down
LOC_Os04g59320	205.299	283.032	127.566	-1.15123	3.87071e-19	2.19118e-18	down
LOC_Os05g49940	286.527	189.346	383.709	1.01753	3.99941e-19	2.26122e-18	up
LOC_Os07g42860	110.859	165.931	55.7874	-1.57683	4.02473e-19	2.2744e-18	down
LOC_Os02g46100	168.747	243.322	94.1714	-1.38614	4.11903e-19	2.32538e-18	down
LOC_Os06g03710	86.4373	134.769	38.105	-1.82757	4.19412e-19	2.36718e-18	down
LOC_Os01g63310	78.3294	124.998	31.6602	-1.97374	4.34034e-19	2.44667e-18	down
LOC_Os01g68070	267.053	171.652	362.454	1.07767	4.36354e-19	2.45913e-18	up
LOC_Os04g46560	94.1746	145.182	43.1671	-1.76281	4.93682e-19	2.77464e-18	down
LOC_Os06g02730	82.5103	130.041	34.9795	-1.89662	5.0691e-19	2.84687e-18	down
LOC_Os07g05380	215.389	133.157	297.621	1.16039	5.38763e-19	3.02128e-18	up
LOC_Os01g33160	120.815	179.655	61.9749	-1.53595	5.7238e-19	3.20742e-18	down
LOC_Os02g25230	210.579	290.724	130.434	-1.15425	5.81239e-19	3.25545e-18	down
LOC_Os01g11260	178.337	250.637	106.038	-1.2409	6.30925e-19	3.52678e-18	down
LOC_Os04g24430	169.528	247.849	91.2065	-1.42643	6.33884e-19	3.54245e-18	down
LOC_Os11g03230	149.618	214.61	84.626	-1.34689	6.47645e-19	3.61579e-18	down
LOC_Os06g18930	179.681	251.322	108.041	-1.22316	6.54136e-19	3.65113e-18	down
LOC_Os12g42700	77.4503	124.241	30.6591	-2.00994	6.78357e-19	3.78447e-18	down
LOC_Os07g46540	161.342	230.021	92.6627	-1.31027	6.8729e-19	3.83242e-18	down
LOC_Os06g35900	234.942	321.99	147.894	-1.13055	7.45383e-19	4.14617e-18	down
LOC_Os02g43660	136.901	200.886	72.916	-1.46335	7.78915e-19	4.32633e-18	down
LOC_Os11g37100	45.2396	80.2582	10.2209	-2.96269	8.09138e-19	4.4898e-18	down
LOC_Os01g64820	100.531	153.037	48.0244	-1.6683	8.40301e-19	4.66159e-18	down
LOC_Os11g04710	239.646	321.848	157.443	-1.0325	8.95783e-19	4.96089e-18	down
LOC_Os03g13400	75.4194	120.597	30.2418	-2.01664	9.8866e-19	5.46724e-18	down
LOC_Os09g27650	185.867	259.187	112.548	-1.20428	1.04005e-18	5.74165e-18	down
LOC_Os01g52710	195.791	269.76	121.822	-1.14737	1.19043e-18	6.56223e-18	down
LOC_Os02g52040	74.3749	121.395	27.3553	-2.15471	1.20169e-18	6.62269e-18	down
LOC_Os04g46130	448.193	661.579	234.807	-1.49843	1.23462e-18	6.79924e-18	down
LOC_Os05g40630	53.5942	91.037	16.1513	-2.50779	1.25612e-18	6.91597e-18	down
LOC_Os02g42160	78.0474	125.047	31.0478	-2.0041	1.28192e-18	7.05632e-18	down
LOC_Os08g41440	241.015	325.47	156.56	-1.05623	1.32272e-18	7.27382e-18	down
LOC_Os10g40530	40.8216	77.9663	3.67685	-4.41107	1.34016e-18	7.36441e-18	down
LOC_Os03g39020	209.532	287.338	131.726	-1.12465	1.34329e-18	7.37979e-18	down
LOC_Os06g39390	263.075	353.817	172.333	-1.03971	1.38551e-18	7.60806e-18	down
LOC_Os02g21810	213.063	290.308	135.819	-1.09241	1.42193e-18	7.79862e-18	down
novel.911	172.081	241.796	102.367	-1.24174	1.42728e-18	7.82608e-18	down
LOC_Os10g17790	128.422	189.168	67.6768	-1.48078	1.44082e-18	7.89845e-18	down
LOC_Os10g41420	162.752	229.711	95.793	-1.26767	1.45338e-18	7.96151e-18	down
LOC_Os10g25230	44.7573	79.1753	10.3393	-2.94009	1.47782e-18	8.09147e-18	down
LOC_Os07g33480	249.876	165.208	334.544	1.01643	1.51001e-18	8.26376e-18	up
LOC_Os04g15920	126.331	187.629	65.0331	-1.52746	1.51197e-18	8.27248e-18	down
LOC_Os12g43590	244.42	159.429	329.411	1.04281	1.82088e-18	9.93154e-18	up
LOC_Os06g43044	204.53	285.068	123.992	-1.19602	1.84781e-18	1.0076e-17	down
LOC_Os04g14680	169.287	238.403	100.171	-1.25101	1.89747e-18	1.03393e-17	down
LOC_Os09g39620	102.044	153.911	50.1775	-1.61668	1.92013e-18	1.04603e-17	down
LOC_Os06g19070	226.931	314.316	139.546	-1.17456	2.16311e-18	1.17614e-17	down
LOC_Os12g05440	83.702	131.817	35.5871	-1.89943	2.19141e-18	1.19124e-17	down
LOC_Os08g43730	157.017	222.672	91.3627	-1.29356	2.20922e-18	1.20064e-17	down
LOC_Os07g01600	254.783	340.112	169.455	-1.00237	2.33193e-18	1.26641e-17	down
LOC_Os11g01620	66.45	109.422	23.4777	-2.25687	2.35892e-18	1.28046e-17	down
LOC_Os03g20840	185.707	258.72	112.693	-1.19803	2.4072e-18	1.30604e-17	down
LOC_Os10g41430	128.08	188.808	67.3514	-1.4757	2.48783e-18	1.34914e-17	down
LOC_Os07g05360	167.143	237.669	96.6171	-1.28911	2.66297e-18	1.44274e-17	down
LOC_Os10g05490	110.367	164.901	55.8327	-1.55556	2.81169e-18	1.52186e-17	down
LOC_Os02g40820	172.173	241.11	103.237	-1.22979	2.83642e-18	1.53488e-17	down
LOC_Os06g14810	218.016	301.657	134.374	-1.17577	2.88774e-18	1.56191e-17	down
LOC_Os07g22580	45.5351	80.8409	10.2292	-2.93763	3.03653e-18	1.64004e-17	down
LOC_Os04g55620	231.417	317.126	145.707	-1.11937	3.22104e-18	1.73681e-17	down
LOC_Os03g20330	89.7677	138.258	41.2772	-1.75206	3.47282e-18	1.86769e-17	down
LOC_Os07g31960	148.453	212.362	84.5432	-1.32273	3.49803e-18	1.8808e-17	down
LOC_Os10g32580	152.574	217.945	87.2038	-1.31882	3.62254e-18	1.9459e-17	down
LOC_Os09g32964	117.751	174.504	60.9976	-1.52271	3.81156e-18	2.04647e-17	down
LOC_Os12g11370	242.167	328.278	156.056	-1.06861	3.96564e-18	2.12669e-17	down
LOC_Os12g42150	175.83	106.866	244.794	1.1931	4.02633e-18	2.15821e-17	up
novel.661	45.519	10.6019	80.4362	2.91824	4.29571e-18	2.30098e-17	up
LOC_Os12g12514	153.91	219.883	87.9371	-1.32345	4.69447e-18	2.51228e-17	down
LOC_Os02g44720	65.1914	107.738	22.6449	-2.25305	4.72869e-18	2.52992e-17	down
LOC_Os04g58190	139.298	200.45	78.1453	-1.35973	5.09512e-18	2.72276e-17	down
LOC_Os11g42660	63.0671	103.244	22.8902	-2.17141	5.09809e-18	2.7237e-17	down
LOC_Os11g42960	114.689	170.274	59.1043	-1.53004	5.26978e-18	2.8141e-17	down
LOC_Os02g41510	39.9169	72.2349	7.59898	-3.24084	5.37723e-18	2.87081e-17	down
LOC_Os03g48810	195.665	270.089	121.241	-1.15952	6.55952e-18	3.48888e-17	down
LOC_Os03g29150	79.9969	126.42	33.5743	-1.9207	6.56357e-18	3.49022e-17	down
LOC_Os05g36310	179.66	108.818	250.502	1.20217	6.97845e-18	3.70823e-17	up
LOC_Os02g15520	223.617	303.566	143.668	-1.0802	7.07041e-18	3.75446e-17	down
LOC_Os04g38320	56.4204	95.1035	17.7373	-2.41135	7.51602e-18	3.98735e-17	down
LOC_Os03g42630	68.6685	110.334	27.0026	-2.03281	7.65728e-18	4.06135e-17	down
LOC_Os12g19180	65.708	106.755	24.6605	-2.12954	9.01421e-18	4.76546e-17	down
LOC_Os07g43120	121.966	177.787	66.1458	-1.42628	9.51709e-18	5.02897e-17	down
LOC_Os04g03920	43.7228	76.8217	10.624	-2.85243	9.91968e-18	5.23805e-17	down
LOC_Os01g57650	114.177	168.697	59.6567	-1.49742	1.01026e-17	5.33094e-17	down
LOC_Os08g36040	124.339	67.3151	181.363	1.42738	1.11141e-17	5.84836e-17	up
LOC_Os05g05930	67.2946	26.1762	108.413	2.05346	1.11679e-17	5.8753e-17	up
LOC_Os08g05480	231.883	313.418	150.348	-1.06057	1.12866e-17	5.93499e-17	down
LOC_Os01g11020	63.333	22.8678	103.798	2.18399	1.15608e-17	6.07499e-17	up
LOC_Os03g17960	46.0608	79.9749	12.1467	-2.73442	1.20022e-17	6.30544e-17	down
novel.618	136.387	196.332	76.4419	-1.35983	1.21875e-17	6.39982e-17	down
LOC_Os12g44090	118.322	173.532	63.1124	-1.46307	1.23542e-17	6.48288e-17	down
LOC_Os05g03460	110.849	56.877	164.82	1.53994	1.25844e-17	6.60063e-17	up
LOC_Os12g05210	37.5301	6.32007	68.74	3.45095	1.39019e-17	7.28326e-17	up
LOC_Os08g42600	76.1776	123.029	29.3264	-2.05909	1.40235e-17	7.34528e-17	down
LOC_Os03g17164	78.8968	124.843	32.9508	-1.90361	1.46017e-17	7.64462e-17	down
LOC_Os02g48830	199.759	274.312	125.207	-1.1323	1.46945e-17	7.69139e-17	down
LOC_Os02g16940	63.29	103.305	23.2754	-2.15028	1.57029e-17	8.20224e-17	down
LOC_Os03g58020	253.789	168.904	338.673	1.00074	1.67612e-17	8.74697e-17	up
LOC_Os01g42070	57.5912	95.6856	19.4969	-2.30466	1.73327e-17	9.04314e-17	down
LOC_Os02g06830	54.4077	91.6654	17.15	-2.40823	1.76494e-17	9.20414e-17	down
LOC_Os11g44430	77.3105	121.797	32.824	-1.87942	1.94361e-17	1.01289e-16	down
LOC_Os11g06880	110.293	163.507	57.0791	-1.51053	2.08543e-17	1.08506e-16	down
LOC_Os03g04550	72.6792	115.09	30.2681	-1.93866	2.09334e-17	1.08892e-16	down
LOC_Os04g52440	66.8413	26.0837	107.599	2.03865	2.10471e-17	1.09458e-16	up
LOC_Os03g53540	170.737	239.348	102.125	-1.23195	2.23406e-17	1.16026e-16	down
LOC_Os01g08220	51.7637	87.8821	15.6453	-2.46767	2.27964e-17	1.18339e-16	down
LOC_Os04g30720	56.1889	93.8975	18.4803	-2.37367	2.3471e-17	1.2173e-16	down
LOC_Os09g18450	69.2063	110.959	27.4535	-2.00967	2.50827e-17	1.29911e-16	down
LOC_Os05g07680	186.785	256.568	117.001	-1.12969	2.5191e-17	1.30442e-16	down
LOC_Os07g29310	116.141	170.705	61.5777	-1.46176	2.55596e-17	1.3226e-16	down
LOC_Os02g24100	266.453	174.945	357.96	1.02821	2.56596e-17	1.32747e-16	up
LOC_Os03g61270	84.595	38.1293	131.061	1.77921	2.69042e-17	1.39028e-16	up
LOC_Os03g04250	194.868	268.688	121.048	-1.14307	2.91779e-17	1.50503e-16	down
LOC_Os11g30910	182.865	114.695	251.036	1.1292	3.02655e-17	1.55971e-16	up
LOC_Os09g30458	105.545	52.9913	158.099	1.57419	3.20574e-17	1.65055e-16	up
novel.695	71.2573	29.7963	112.718	1.91905	3.23334e-17	1.66401e-16	up
LOC_Os04g38810	63.6814	103.84	23.523	-2.15198	3.30452e-17	1.69949e-16	down
LOC_Os12g37400	65.5481	105.401	25.6951	-2.03961	3.3921e-17	1.74295e-16	down
LOC_Os01g43650	103.144	154.224	52.0639	-1.57021	3.53277e-17	1.81277e-16	down
LOC_Os09g19830	266.048	356.247	175.848	-1.01092	3.6825e-17	1.88534e-16	down
LOC_Os12g36100	58.384	95.7401	21.0279	-2.19055	3.7059e-17	1.89689e-16	down
LOC_Os07g08500	49.9592	85.6463	14.2722	-2.5822	3.8113e-17	1.94996e-16	down
LOC_Os10g39170	120.145	176.75	63.5397	-1.48537	3.89849e-17	1.99278e-16	down
LOC_Os05g08890	43.512	75.979	11.0451	-2.7885	3.93537e-17	2.01072e-16	down
LOC_Os02g32420	192.091	261.892	122.291	-1.09833	4.08839e-17	2.08844e-16	down
LOC_Os06g15620	204.402	276.635	132.169	-1.06635	4.10142e-17	2.09462e-16	down
LOC_Os11g05730	44.9637	77.7807	12.1467	-2.69548	4.10371e-17	2.09532e-16	down
LOC_Os02g37300	196.041	266.54	125.542	-1.08747	4.43251e-17	2.25964e-16	down
LOC_Os06g13760	131.742	190.002	73.4829	-1.36578	4.50568e-17	2.29334e-16	down
LOC_Os02g34490	80.8101	126.309	35.3108	-1.83886	4.64085e-17	2.36055e-16	down
LOC_Os01g46950	166.027	230.677	101.376	-1.18832	4.87228e-17	2.47495e-16	down
LOC_Os05g50960	140.942	200.666	81.2182	-1.31301	5.07783e-17	2.57705e-16	down
LOC_Os03g56620	205.952	131.267	280.638	1.09912	5.40167e-17	2.73468e-16	up
LOC_Os06g01660	236.143	315.682	156.604	-1.00631	5.5524e-17	2.81036e-16	down
LOC_Os07g03880	135.334	77.6094	193.059	1.31517	5.56719e-17	2.81722e-16	up
LOC_Os04g50770	222.533	300.538	144.529	-1.04945	5.60477e-17	2.8356e-16	down
LOC_Os05g06140	42.6168	75.2974	9.93622	-2.9185	5.75143e-17	2.90851e-16	down
LOC_Os04g31410	165.04	229.038	101.042	-1.18339	5.98998e-17	3.02645e-16	down
LOC_Os02g41460	108.276	161.908	54.6437	-1.56284	6.36004e-17	3.21199e-16	down
LOC_Os03g21710	50.319	84.9437	15.6943	-2.44002	6.61078e-17	3.3364e-16	down
LOC_Os12g37920	235.361	155.449	315.273	1.0183	7.06987e-17	3.56255e-16	up
LOC_Os02g52990	194.938	268.658	121.218	-1.15452	7.30472e-17	3.676e-16	down
LOC_Os12g17430	83.7646	129.459	38.0702	-1.7619	7.5182e-17	3.78091e-16	down
LOC_Os02g50630	62.1421	100.497	23.7873	-2.07161	7.65746e-17	3.84924e-16	down
LOC_Os01g62670	126.797	183.884	69.7103	-1.4017	7.80748e-17	3.92205e-16	down
LOC_Os08g36920	36.9457	71.5076	2.38387	-4.93909	8.25074e-17	4.14014e-16	down
LOC_Os05g35500	121.015	177.064	64.9661	-1.43992	8.76207e-17	4.39575e-16	down
LOC_Os01g55260	64.5998	103.386	25.8136	-2.00981	8.8416e-17	4.43467e-16	down
LOC_Os01g31890	211.694	135.198	288.19	1.0946	9.6118e-17	4.81459e-16	up
LOC_Os09g19650	189.16	259.692	118.627	-1.12471	9.62876e-17	4.82202e-16	down
LOC_Os07g04950	57.6097	94.7955	20.4238	-2.20468	9.65926e-17	4.83623e-16	down
LOC_Os03g22040	63.7937	103.873	23.7144	-2.13584	9.71965e-17	4.8654e-16	down
LOC_Os08g09290	37.4169	68.0697	6.76407	-3.29202	1.02527e-16	5.12542e-16	down
LOC_Os08g08680	102.458	153.978	50.9392	-1.58473	1.10374e-16	5.50926e-16	down
LOC_Os10g40260	217.975	294.754	141.197	-1.05632	1.1135e-16	5.55307e-16	down
LOC_Os03g19220	208.508	281.514	135.502	-1.05181	1.23217e-16	6.13543e-16	down
LOC_Os04g31460	111.655	164.243	59.0673	-1.48247	1.2915e-16	6.42101e-16	down
LOC_Os06g29250	132.086	74.3695	189.803	1.35112	1.31721e-16	6.54598e-16	up
LOC_Os04g35890	215.523	289.157	141.888	-1.029	1.35496e-16	6.73065e-16	down
LOC_Os09g21510	42.3378	73.9583	10.7172	-2.79442	1.43974e-16	7.14395e-16	down
LOC_Os09g37650	34.7656	66.8913	2.63985	-4.65302	1.46063e-16	7.24602e-16	down
LOC_Os12g39830	64.4851	104.769	24.2014	-2.15057	1.55177e-16	7.69146e-16	down
LOC_Os06g07300	103.534	154.371	52.6965	-1.54191	1.56458e-16	7.74986e-16	down
LOC_Os06g45570	233.4	313.316	153.484	-1.03188	1.58233e-16	7.83434e-16	down
LOC_Os03g58850	34.1734	65.3038	3.04297	-4.44483	1.66753e-16	8.24362e-16	down
LOC_Os04g20330	114.979	167.728	62.2309	-1.43064	1.67003e-16	8.25418e-16	down
LOC_Os03g43860	154.132	216.314	91.9497	-1.23192	1.7076e-16	8.43251e-16	down
LOC_Os01g52770	109.485	164.916	54.054	-1.6004	1.76613e-16	8.71777e-16	down
LOC_Os11g10520	84.0914	128.816	39.367	-1.70525	1.77138e-16	8.7418e-16	down
LOC_Os11g26880	151.353	215.166	87.541	-1.2884	1.97648e-16	9.72856e-16	down
LOC_Os06g32990	37.339	67.0432	7.6349	-3.13115	1.99954e-16	9.83784e-16	down
LOC_Os02g36890	98.8393	148.033	49.6452	-1.57311	2.02953e-16	9.98105e-16	down
LOC_Os08g10340	137.397	80.2231	194.57	1.27678	2.12975e-16	1.04649e-15	up
LOC_Os02g42650	150.489	213.328	87.6495	-1.27348	2.1462e-16	1.05434e-15	down
LOC_Os06g28480	190.11	263.45	116.771	-1.17838	2.16573e-16	1.06347e-15	down
LOC_Os02g06340	59.2251	96.3769	22.0732	-2.11702	2.24307e-16	1.10098e-15	down
LOC_Os06g14630	53.3861	88.5672	18.205	-2.27874	2.24727e-16	1.1028e-15	down
LOC_Os06g35060	49.5272	84.2227	14.8318	-2.47282	2.41881e-16	1.18493e-15	down
LOC_Os07g49370	165.351	228.184	102.518	-1.1579	2.51347e-16	1.22971e-15	down
LOC_Os02g30080	161.752	225.475	98.0284	-1.20212	2.56585e-16	1.25398e-15	down
LOC_Os06g11520	133.06	191.995	74.125	-1.37523	2.69082e-16	1.31393e-15	down
LOC_Os06g14460	46.7755	79.5888	13.9623	-2.51041	2.70436e-16	1.32026e-15	down
LOC_Os03g48750	204.338	132.406	276.271	1.05742	2.78625e-16	1.35907e-15	up
LOC_Os01g44430	211.235	138.657	283.812	1.0316	2.95862e-16	1.4416e-15	up
LOC_Os03g60880	57.4798	93.373	21.5865	-2.1116	3.2723e-16	1.59239e-15	down
LOC_Os03g04060	208.003	284.181	131.825	-1.10007	3.32932e-16	1.61944e-15	down
LOC_Os05g40150	181.925	115.364	248.486	1.10581	3.50376e-16	1.70247e-15	up
LOC_Os03g12140	42.2985	73.3498	11.2472	-2.69837	3.58256e-16	1.73964e-15	down
LOC_Os01g56480	133.734	76.2897	191.179	1.33099	3.73045e-16	1.80952e-15	up
LOC_Os03g61080	157.811	220.083	95.5393	-1.19567	3.82903e-16	1.85615e-15	down
LOC_Os10g07380	208.598	136.223	280.972	1.04871	3.85527e-16	1.86847e-15	up
LOC_Os03g54910	101.474	151.571	51.3775	-1.57415	3.92474e-16	1.90132e-15	down
LOC_Os09g37080	77.5939	120.127	35.061	-1.78971	4.43325e-16	2.14264e-15	down
LOC_Os01g22570	68.7008	108.409	28.993	-1.91537	4.43591e-16	2.14347e-15	down
LOC_Os01g03710	146.291	87.0329	205.55	1.23626	4.51832e-16	2.18144e-15	up
LOC_Os04g08450	86.7586	131.589	41.928	-1.66496	4.64518e-16	2.24173e-15	down
LOC_Os11g45250	181.318	115.613	247.023	1.09776	5.05533e-16	2.43449e-15	up
LOC_Os02g47790	75.7665	117.783	33.7501	-1.8174	5.21005e-16	2.50634e-15	down
LOC_Os12g42160	75.5642	116.808	34.3204	-1.76949	5.3615e-16	2.57756e-15	down
LOC_Os01g34870	115.428	171.544	59.3113	-1.52752	5.72485e-16	2.74992e-15	down
LOC_Os03g05750	167.774	234.231	101.316	-1.20117	6.04042e-16	2.89843e-15	down
LOC_Os07g08140	115.928	167.766	64.0897	-1.38641	6.19919e-16	2.97211e-15	down
LOC_Os03g13050	44.0267	75.9271	12.1263	-2.63206	6.23732e-16	2.98912e-15	down
LOC_Os02g10020	39.9712	69.7764	10.1659	-2.80089	6.88983e-16	3.29418e-15	down
LOC_Os05g48680	79.0129	120.882	37.1433	-1.70848	6.89499e-16	3.29595e-15	down
LOC_Os11g13820	34.0829	65.8931	2.27265	-4.82539	6.96023e-16	3.32643e-15	down
LOC_Os01g44130	184.621	258.502	110.74	-1.23187	7.00272e-16	3.34534e-15	down
LOC_Os01g03320	81.0216	35.3794	126.664	1.83253	7.03485e-16	3.35927e-15	up
LOC_Os03g56580	84.4496	128.495	40.404	-1.66527	7.52299e-16	3.58709e-15	down
LOC_Os09g26310	145.979	207.386	84.5719	-1.28881	7.6426e-16	3.64335e-15	down
LOC_Os03g59280	153.526	218.689	88.3623	-1.30793	8.41543e-16	4.00169e-15	down
LOC_Os05g38500	132.668	189.284	76.0523	-1.31754	8.49813e-16	4.03848e-15	down
novel.41	125	70.2731	179.726	1.35086	8.51089e-16	4.04285e-15	up
LOC_Os02g49770	171.643	236.69	106.596	-1.1486	8.83944e-16	4.19278e-15	down
LOC_Os12g01220	60.389	96.9165	23.8615	-2.03169	8.99119e-16	4.26387e-15	down
LOC_Os01g60340	114.114	165.473	62.7549	-1.40619	9.37158e-16	4.43869e-15	down
LOC_Os02g09220	153.112	212.203	94.0216	-1.17992	9.88333e-16	4.67425e-15	down
LOC_Os01g02300	73.5501	114.709	32.3912	-1.81782	1.02945e-15	4.86165e-15	down
LOC_Os02g11700	143.529	202.712	84.3449	-1.26128	1.04387e-15	4.92769e-15	down
LOC_Os12g43440	193.016	117.698	268.334	1.1838	1.06709e-15	5.03518e-15	up
LOC_Os03g61150	74.266	33.1073	115.425	1.80394	1.06947e-15	5.0454e-15	up
LOC_Os08g03560	36.1628	64.8092	7.51643	-3.08859	1.07285e-15	5.06025e-15	down
LOC_Os02g43900	129.599	184.242	74.9565	-1.30362	1.07658e-15	5.07577e-15	down
LOC_Os11g07090	41.6686	71.9428	11.3943	-2.66667	1.08497e-15	5.11423e-15	down
LOC_Os05g03120	205.588	275.501	135.675	-1.01752	1.09555e-15	5.16303e-15	down
LOC_Os05g37900	209.595	282.562	136.627	-1.04306	1.13211e-15	5.33203e-15	down
LOC_Os04g30010	95.2322	142.955	47.509	-1.58887	1.21285e-15	5.70754e-15	down
LOC_Os03g06430	55.7036	19.5392	91.868	2.24043	1.23475e-15	5.80701e-15	up
LOC_Os05g03130	43.8746	12.1337	75.6156	2.62618	1.26073e-15	5.92306e-15	up
LOC_Os02g56520	50.7068	84.6761	16.7375	-2.36646	1.3291e-15	6.23779e-15	down
LOC_Os02g46210	89.9445	134.715	45.1741	-1.58124	1.3347e-15	6.2628e-15	down
LOC_Os05g38350	166.048	228.819	103.276	-1.14736	1.35251e-15	6.34373e-15	down
LOC_Os01g44069	208.093	279.218	136.969	-1.03435	1.40082e-15	6.56763e-15	down
LOC_Os10g25140	140.907	197.244	84.5708	-1.21902	1.44715e-15	6.77785e-15	down
LOC_Os01g74490	201.077	131.159	270.996	1.04432	1.46759e-15	6.86792e-15	up
LOC_Os01g53840	115.901	167.05	64.7533	-1.3612	1.5075e-15	7.05175e-15	down
LOC_Os05g03972	101.07	148.984	53.1569	-1.48068	1.52e-15	7.1088e-15	down
LOC_Os09g30070	57.415	92.9852	21.8449	-2.09911	1.57451e-15	7.35555e-15	down
LOC_Os04g46440	123.833	176.361	71.3059	-1.30872	1.57571e-15	7.3587e-15	down
LOC_Os08g32500	99.9724	149.08	50.865	-1.53418	1.57931e-15	7.37402e-15	down
LOC_Os02g05960	101.694	149.679	53.7085	-1.48605	1.64889e-15	7.69574e-15	down
LOC_Os02g10470	152.845	212.425	93.2645	-1.18553	1.66901e-15	7.78642e-15	down
LOC_Os03g03320	146.718	204.565	88.8711	-1.2094	1.74163e-15	8.11354e-15	down
LOC_Os01g07890	170.599	108.282	232.917	1.10521	1.75236e-15	8.16021e-15	up
LOC_Os09g37394	155.294	216.54	94.049	-1.20208	1.811e-15	8.42636e-15	down
LOC_Os08g24310	101.614	149.738	53.4895	-1.48876	1.97909e-15	9.19526e-15	down
LOC_Os09g37510	48.1562	80.3525	15.96	-2.35464	2.01674e-15	9.36442e-15	down
LOC_Os10g35820	57.5331	92.4534	22.6128	-2.03123	2.17792e-15	1.01005e-14	down
LOC_Os08g32600	47.5814	80.0653	15.0974	-2.39184	2.24992e-15	1.04237e-14	down
LOC_Os07g02100	200.245	268.273	132.217	-1.01733	2.28481e-15	1.0581e-14	down
LOC_Os09g29600	176.023	240.302	111.745	-1.11404	2.28938e-15	1.05979e-14	down
LOC_Os11g29720	81.5693	39.4744	123.664	1.64601	2.36014e-15	1.0921e-14	up
LOC_Os07g35520	48.0752	80.7873	15.3631	-2.39928	2.36989e-15	1.09639e-14	down
LOC_Os02g50040	130.663	185.499	75.8271	-1.28798	2.40579e-15	1.11232e-14	down
LOC_Os09g23570	116.617	168.036	65.1971	-1.37046	2.42102e-15	1.1189e-14	down
LOC_Os07g40900	55.3683	90.3761	20.3605	-2.16896	2.46894e-15	1.14058e-14	down
LOC_Os09g34930	33.4004	60.6683	6.13257	-3.33479	2.50613e-15	1.15753e-14	down
LOC_Os04g43230	48.9305	81.2336	16.6274	-2.2879	2.65242e-15	1.22261e-14	down
LOC_Os11g27400	60.0519	96.381	23.7227	-2.01338	2.7362e-15	1.26046e-14	down
LOC_Os07g44440	165.492	104.918	226.067	1.10687	2.77036e-15	1.27542e-14	up
LOC_Os02g33000	75.1416	115.585	34.6983	-1.73942	2.77493e-15	1.27701e-14	down
LOC_Os01g52160	87.2619	132.348	42.1754	-1.65034	2.80864e-15	1.292e-14	down
LOC_Os02g51370	95.6165	141.192	50.041	-1.49308	2.87051e-15	1.31992e-14	down
LOC_Os12g13100	151.75	211.261	92.2392	-1.19995	2.9789e-15	1.36865e-14	down
LOC_Os03g48050	174.337	109.472	239.202	1.12721	3.07843e-15	1.41296e-14	up
LOC_Os11g43250	77.8675	119.262	36.4735	-1.71621	3.32252e-15	1.52283e-14	down
LOC_Os01g15540	145.319	201.879	88.7586	-1.1848	3.38348e-15	1.54983e-14	down
LOC_Os04g51660	181.368	246.822	115.913	-1.09616	3.73029e-15	1.70491e-14	down
LOC_Os11g47030	152.835	92.9045	212.765	1.19591	3.74177e-15	1.70947e-14	up
LOC_Os01g71170	196.302	266.865	125.738	-1.09025	3.8558e-15	1.76086e-14	down
LOC_Os01g70050	61.8959	97.9423	25.8495	-1.93161	3.92466e-15	1.79195e-14	down
LOC_Os04g54390	171.072	233.516	108.628	-1.10241	4.08866e-15	1.86532e-14	down
LOC_Os02g51540	122.87	175.633	70.1073	-1.32311	4.10374e-15	1.87183e-14	down
LOC_Os05g40720	159.608	219.243	99.9733	-1.13209	4.12184e-15	1.8797e-14	down
novel.597	174.48	111.374	237.587	1.09083	4.20296e-15	1.91632e-14	up
LOC_Os02g17000	31.6994	60.9791	2.41979	-4.70654	4.20764e-15	1.91806e-14	down
LOC_Os12g02910	137.675	194.52	80.8296	-1.2728	4.44352e-15	2.02437e-14	down
LOC_Os02g04780	77.5735	36.0043	119.143	1.72358	4.53991e-15	2.06745e-14	up
LOC_Os01g55370	63.1362	99.4134	26.8589	-1.8851	4.89307e-15	2.22471e-14	down
LOC_Os05g42150	30.7752	57.4811	4.06927	-3.84545	5.03054e-15	2.28492e-14	down
LOC_Os12g43350	100.977	148.63	53.3244	-1.48125	5.05714e-15	2.29655e-14	down
LOC_Os06g27860	125.217	71.3917	179.042	1.3327	5.13135e-15	2.32792e-14	up
LOC_Os01g23580	42.3266	72.5808	12.0724	-2.56729	5.37565e-15	2.43486e-14	down
LOC_Os07g03100	160.441	101.651	219.232	1.10913	5.59319e-15	2.5312e-14	up
novel.807	203.801	133.909	273.693	1.02927	5.63568e-15	2.54908e-14	up
LOC_Os03g20090	157.873	218.046	97.6995	-1.16101	6.6251e-15	2.99065e-14	down
LOC_Os06g46060	151.265	93.9795	208.551	1.14713	6.86294e-15	3.09493e-14	up
LOC_Os12g15680	122.27	173.363	71.1767	-1.28505	7.07091e-15	3.18682e-14	down
LOC_Os04g05580	33.6514	60.8414	6.46146	-3.1995	7.21997e-15	3.25271e-14	down
LOC_Os09g36740	56.0757	91.5542	20.5972	-2.13506	7.57258e-15	3.40683e-14	down
LOC_Os06g08610	69.3192	106.969	31.6699	-1.75843	7.73172e-15	3.47568e-14	down
LOC_Os05g44340	73.6914	34.0245	113.358	1.73241	8.02735e-15	3.60216e-14	up
LOC_Os12g38150	187.562	123.148	251.976	1.03325	8.1834e-15	3.67145e-14	up
LOC_Os01g70560	46.7691	77.4694	16.0688	-2.27658	8.30348e-15	3.72386e-14	down
LOC_Os02g48094	36.6088	64.1713	9.04636	-2.83531	8.36903e-15	3.75251e-14	down
LOC_Os11g37700	130.136	182.98	77.2924	-1.2408	8.7958e-15	3.93878e-14	down
LOC_Os05g38460	116.569	166.563	66.5762	-1.31535	9.42016e-15	4.21383e-14	down
LOC_Os05g03440	154.065	213.124	95.007	-1.15575	9.51472e-15	4.25362e-14	down
LOC_Os03g03350	97.8642	143.761	51.9679	-1.46402	9.68402e-15	4.3276e-14	down
LOC_Os07g44850	103.771	57.2959	150.246	1.39329	1.08477e-14	4.83526e-14	up
LOC_Os02g48320	128.219	181.911	74.5272	-1.28461	1.18165e-14	5.2516e-14	down
LOC_Os10g27330	167.898	227.998	107.798	-1.08165	1.30385e-14	5.78564e-14	down
LOC_Os02g58390	88.7595	133.642	43.8774	-1.59382	1.34864e-14	5.97859e-14	down
LOC_Os05g30454	198.485	267.475	129.494	-1.05195	1.35716e-14	6.01397e-14	down
[truncated: 1,439 more rows]
