# Supplementary material
Source: Research Square preprint supplement (doi:10.21203/rs.3.rs-9447148/v1)
Supplement: Supplementary file 5 [file 64742cfd45e543ebd417d4ce.xlsx]

## Sheet: Sheet1
Table S10 KEGG information of DEGs and DAMs（CK_Root vs. Salt_Root)
KEGG_map	Description	Rich_factor_meta	DiffRatio_meta	BgRatio_meta	P-value_meta	Adjusted P-value_meta	Index_meta	CID_meta	Rich_factor_gene	DiffRatio_gene	BgRatio_gene	P-value_gene	Adjusted P-value_gene	Index_gene	KO_gene	Hyperlink
ko00940	Phenylpropanoid biosynthesis	4/11	4/156	11/427	0.618309	0.965008	MEDL02347;MEDP0290;MEDL02026;MEDL02161	C00079+C00482+C02666+C02646	75/292	75/985	292/10463	1.8947e-16	2.42521e-14	LOC_Os01g22352;LOC_Os03g13210;LOC_Os03g25330;LOC_Os05g04440;LOC_Os05g41990;LOC_Os07g01410;LOC_Os10g02040;LOC_Os10g02070;LOC_Os01g19020;LOC_Os05g04470;LOC_Os03g25280;LOC_Os11g02100;LOC_Os04g55740;LOC_Os08g02110;LOC_Os07g48030;LOC_Os03g25320;LOC_Os02g14160;LOC_Os01g15830;LOC_Os04g59260;LOC_Os07g34710;LOC_Os07g34670;LOC_Os06g48010;LOC_Os08g14760;LOC_Os03g36560;LOC_Os12g02080;LOC_Os01g15810;LOC_Os06g…	K00430+K00430+K00430+K00430+K00430+K00430+K00430+K00430+K00430+K00430+K00430+K00430+K00430+K00430+K00430+K00430+K00430+K00430+K00430+K00430+K00430+K00430+K01904+K00430+K00430+K00430+K00430+K00430+K00430+K00430+K00430+K00430+K00430+K00430+K09753+K00430+K00430+K01904+K00083+K00487+K00430+K00430+K00430+K00430+K00430+K00430+K00430+K00430+K00430+K00430+K00430+K00430+K13065+K00430+K00430+K00083+K09753+…	https://www.genome.jp/dbget-bin/www_bget?ko00940
ko01110	Biosynthesis of secondary metabolites	74/192	74/156	192/427	0.248835	0.965008	MW0054460;MW0000973;MW0056883;MW0052877;MEDL02462;MEDN0198;MEDP0022;MEDL02396;MEDL00009;MW0015654;MEDN0153;MEDP0065;MEDL02347;MEDL00873;MW0015435;MW0016109;MEDL02259;MEDN0442;MEDP0290;MEDL02026;MEDP1614;MEDL02183;MEDN0037;MW0061670;MEDL00926;MW0052879;MEDL01840;MEDN0010;MEDP0457;MW0103902;MW0103558;MEDL02184;MW0104839;MW0053624;MW0015831;MEDP1465;MW0000452;MW0140185;MW0141993;MW0148768;MW0148736;…	C08601+C10462+C00157+C03461+C01005+C00158+C00148+C00089+C00183+C04216+C00020+C00624+C00079+C07044+C08606+C08591+C07481+C00831+C00482+C02666+C00129+C00841+C03758+C03313+C13747+C06081+C16666+C00327+C00430+C01107+C04734+C01557+C00988+C20778+C08579+C03046+C06522+C21412+C20466+C18034+C18033+C21410+C12321+C05839+C00096+C00002+C00509+C00448+C04785+C02646+C07475+C16308+C00042+C00029+C00156+C00257+C01083+…	333/2704	333/985	2704/10463	3.06334e-09	1.30702e-07	LOC_Os01g22352;LOC_Os01g47580;LOC_Os03g13210;LOC_Os03g18130;LOC_Os03g19420;LOC_Os03g25330;LOC_Os03g31750;LOC_Os04g08350;LOC_Os05g04440;LOC_Os05g41990;LOC_Os06g13720;LOC_Os07g01410;LOC_Os07g05940;LOC_Os08g03290;LOC_Os09g27500;LOC_Os09g27510;LOC_Os10g02040;LOC_Os10g02070;LOC_Os10g31780;LOC_Os12g16010;LOC_Os05g49840;LOC_Os01g63580;LOC_Os01g19020;LOC_Os05g04470;LOC_Os03g25280;LOC_Os12g08260;LOC_Os03g…	K00430+K18693+K00430+K01953+K05953+K00430+K01006+K13034+K00430+K00430+K00161+K00430+K09840+K00134+K21718+K16084+K00430+K00430+K00059+K13070+K16818+K13508+K00430+K00430+K00430+K00166+K00695+K00927+K00430+K00430+K13496+K00826+K01610+K01087+K05349+K00430+K05953+K00430+K02437+K01895+K00430+K00430+K13679+K00895+K14085+K16818+K01641+K01859+K00827+K00700+K00430+K18857+K01176+K03809+K00430+K00430+K16055+…	https://www.genome.jp/dbget-bin/www_bget?ko01110
ko01100	Metabolic pathways	124/310	124/156	310/427	0.00979871	0.239057	MW0054460;MW0014506;MEDTN00717;MW0056883;MEDP1015;MW0126336;MW0106196;MEDL02462;MW0103675;MEDN1876;MW0114000;MW0103525;MW0114628;MW0106444;MW0001273;MEDN0198;MEDP0022;MEDL02396;MEDL00009;MEDP0054;MEDL00101;MEDN0153;MEDL02050;MEDP0065;MEDL02347;MEDL00873;MEDN1013;MEDN0400;MEDP0180;MW0015435;MEDP0316;MEDN0017;MEDP1153;MEDL02259;MEDN0442;MEDP0290;MEDN0163;MEDL02026;MEDP1604;MEDP1606;MEDP1614;MEDP006…	C08601+C16677+C16678+C00157+C04185+C00647+C06554+C01005+C00364+C05594+C02985+C01346+C04062+C00415+C02814+C00158+C00148+C00089+C00183+C00064+C00836+C00020+C00153+C00624+C00079+C07044+C00360+C06426+C00455+C08606+C05582+C02237+C14748+C07481+C00831+C00482+C00262+C02666+C02938+C00330+C00129+C00645+C03758+C10447+C03313+C05332+C13747+C00534+C00140+C06081+C00378+C01909+C16666+C00327+C01103+C00430+C05682+…	450/4244	450/985	4244/10463	0.000348346	0.00744685	LOC_Os01g22352;LOC_Os01g64520;LOC_Os01g72140;LOC_Os02g15560;LOC_Os03g13210;LOC_Os03g18130;LOC_Os03g19420;LOC_Os03g20120;LOC_Os03g20420;LOC_Os03g25330;LOC_Os03g31750;LOC_Os03g50130;LOC_Os04g08350;LOC_Os05g04440;LOC_Os05g15770;LOC_Os05g41990;LOC_Os06g01760;LOC_Os06g13720;LOC_Os06g51060;LOC_Os07g01410;LOC_Os07g05940;LOC_Os07g10840;LOC_Os07g35560;LOC_Os08g03290;LOC_Os09g28050;LOC_Os10g02040;LOC_Os10g…	K00430+K00365+K00799+K02636+K00430+K01953+K05953+K18819+K01209+K00430+K01006+K00799+K13034+K00430+K01183+K00430+K01213+K00161+K20547+K00430+K09840+K06617+K19891+K00134+K23977+K00430+K00430+K00814+K00059+K07407+K20547+K16818+K13508+K24221+K18819+K00430+K00797+K00430+K00430+K00166+K00695+K00797+K00927+K00430+K00430+K00434+K22133+K01209+K00799+K00826+K01610+K00472+K01087+K05349+K00430+K05953+K00430+…	https://www.genome.jp/dbget-bin/www_bget?ko01100
ko00380	Tryptophan metabolism	1/14	1/156	14/427	0.998484	0.998484	MEDP1604	C02938	25/130	25/985	130/10463	0.00040725	0.00744685	LOC_Os04g39980;LOC_Os09g26880;LOC_Os04g02754;LOC_Os11g19840;LOC_Os02g02400;LOC_Os10g04860;LOC_Os04g10434;LOC_Os02g49720;LOC_Os11g20090;LOC_Os12g16720;LOC_Os03g57680;LOC_Os08g04540;LOC_Os07g25540;LOC_Os11g20160;LOC_Os08g04560;LOC_Os04g45720;LOC_Os05g43940;LOC_Os10g02880;LOC_Os08g07260;LOC_Os09g16580;LOC_Os01g27050;LOC_Os03g03910;LOC_Os07g02120;LOC_Os08g01170;LOC_Os05g43510	K23947+K14085+K01426+K22588+K03781+K11817+K01426+K00128+K22588+K24541+K11817+K01593+K11816+K22588+K01593+K00128+K22588+K22588+K22588+K01426+K11816+K03781+K11816+K22450+K01593	https://www.genome.jp/dbget-bin/www_bget?ko00380
ko00270	Cysteine and methionine metabolism	4/16	4/156	16/427	0.89581	0.965008	MEDL02462;MEDN1387;MW0108967;MW0105076	C01005+C00979+C01077+C00957	27/164	27/985	164/10463	0.0028113	0.0351472	LOC_Os03g19420;LOC_Os04g08350;LOC_Os09g28050;LOC_Os06g33710;LOC_Os02g15550;LOC_Os03g12890;LOC_Os03g19427;LOC_Os10g28350;LOC_Os03g07570;LOC_Os09g27750;LOC_Os02g53180;LOC_Os09g12290;LOC_Os03g63330;LOC_Os03g12110;LOC_Os10g28340;LOC_Os06g35540;LOC_Os03g06630;LOC_Os06g01590;LOC_Os10g37340;LOC_Os09g27820;LOC_Os11g42510;LOC_Os04g48850;LOC_Os10g25950;LOC_Os01g09700;LOC_Os03g51740;LOC_Os04g46560;LOC_Os10g…	K05953+K13034+K23977+K00797+K00797+K00826+K05953+K08967+K00827+K05933+K05933+K12524+K00928+K00547+K08967+K14455+K08967+K00016+K01761+K05933+K00815+K20772+K01739+K01762+K01762+K00025+K01739	https://www.genome.jp/dbget-bin/www_bget?ko00270
ko00941	Flavonoid biosynthesis	2/8	2/156	8/427	0.854911	0.965008	pme0376;MW0138375	C00509+C09806	18/100	18/985	100/10463	0.0052507	0.0560075	LOC_Os03g60509;LOC_Os03g18030;LOC_Os02g26810;LOC_Os10g17260;LOC_Os06g08610;LOC_Os06g46910;LOC_Os09g18450;LOC_Os11g35930;LOC_Os04g01354;LOC_Os01g44260;LOC_Os02g52840;LOC_Os02g26770;LOC_Os04g09680;LOC_Os06g42130;LOC_Os10g10720;LOC_Os08g10420;LOC_Os11g42370;LOC_Os04g51990	K01859+K05278+K00487+K05280+K13065+K08695+K05278+K00660+K00660+K08695+K05278+K00487+K22440+K05277+K05280+K13065+K13065+K13065	https://www.genome.jp/dbget-bin/www_bget?ko00941
ko00520	Amino sugar and nucleotide sugar metabolism	10/15	10/156	15/427	0.0156662	0.254922	MW0114000;MEDP0067;MEDP0232;MW0103681;MW0103583;MW0115006;MEDN0538;MEDP0068;MEDN1221;MW0112794	C02985+C00645+C00140+C00052+C00096+C03410+C00029+C00270+C00275+C20934	33/226	33/985	226/10463	0.00717822	0.0636432	LOC_Os03g20420;LOC_Os05g15770;LOC_Os06g51060;LOC_Os10g39680;LOC_Os11g03730;LOC_Os12g25690;LOC_Os01g47070;LOC_Os06g51050;LOC_Os05g50380;LOC_Os09g35800;LOC_Os01g19220;LOC_Os12g36890;LOC_Os04g27980;LOC_Os08g40680;LOC_Os11g47500;LOC_Os09g12660;LOC_Os03g04060;novel.646;LOC_Os11g19210;LOC_Os06g25010;LOC_Os05g09500;LOC_Os10g11140;LOC_Os10g39700;novel.126;LOC_Os06g51160;LOC_Os06g08620;LOC_Os11g47560;LOC_…	K01209+K01183+K20547+K20547+K01209+K00012+K01183+K20547+K00975+K01784+K15920+K00770+K01183+K01183+K01183+K00975+K20547+K01209+K15920+K01183+K00844+K01835+K20547+K12373+K13648+K13379+K01183+K00012+K20547+K20547+K00844+K12373+K01183	https://www.genome.jp/dbget-bin/www_bget?ko00520
ko00592	alpha-Linolenic acid metabolism	4/5	4/156	5/427	0.0619226	0.57098	MW0056883;MW0012269;MEDL02729;MEDL01893	C00157+C04785+C16308+C16322	18/106	18/985	106/10463	0.00967933	0.0774346	LOC_Os05g49840;LOC_Os12g41980;LOC_Os11g10480;LOC_Os12g41970;LOC_Os04g28870;LOC_Os05g28770;LOC_Os06g11200;LOC_Os03g15460;LOC_Os06g11290;LOC_Os04g30420;LOC_Os04g29030;LOC_Os08g04800;LOC_Os09g32570;LOC_Os02g12680;LOC_Os01g51360;LOC_Os01g46250;LOC_Os11g34440;LOC_Os11g10520	K16818+K16818+K18857+K16818+K00224+K00454+K05894+K01047+K05894+K00224+K00224+K16818+K00224+K01723+K16818+K16818+K01047+K18857	https://www.genome.jp/dbget-bin/www_bget?ko00592
ko00965	Betalain biosynthesis	1/4	1/156	4/427	0.839073	0.965008	MEDN0037	C03758	4/10	4/985	10/10463	0.0103151	0.0776669	LOC_Os08g04540;LOC_Os01g65690;LOC_Os08g04560;LOC_Os05g43510	K01593+K15777+K01593+K01593	https://www.genome.jp/dbget-bin/www_bget?ko00965
ko00010	Glycolysis / Gluconeogenesis	2/6	2/156	6/427	0.710672	0.965008	MEDN0704;MEDN0325	C00036+C00186	26/179	26/985	179/10463	0.0168032	0.115179	LOC_Os03g31750;LOC_Os06g13720;LOC_Os08g03290;LOC_Os06g45710;LOC_Os10g13700;LOC_Os09g21230;LOC_Os02g48360;LOC_Os09g26880;LOC_Os11g10480;LOC_Os05g36270;LOC_Os03g04130;LOC_Os05g10650;LOC_Os08g02700;LOC_Os02g49720;LOC_Os06g01590;LOC_Os01g46950;LOC_Os05g09500;LOC_Os10g11140;LOC_Os04g45720;LOC_Os03g09020;LOC_Os04g38540;LOC_Os11g10520;LOC_Os07g49250;LOC_Os01g53920;LOC_Os03g21260;LOC_Os05g38230	K01006+K00161+K00134+K00927+K01610+K01895+K00895+K14085+K18857+K03841+K01913+K00850+K01623+K00128+K00016+K01792+K00844+K01835+K00128+K00121+K01785+K18857+K01568+K00844+K15633+K00002	https://www.genome.jp/dbget-bin/www_bget?ko00010
ko00430	Taurine and hypotaurine metabolism	1/4	1/156	4/427	0.839073	0.965008	MEDN0316	C01959	6/23	6/985	23/10463	0.0170969	0.115179	LOC_Os04g37500;LOC_Os03g13300;LOC_Os09g37620;LOC_Os09g37650;LOC_Os04g14690;LOC_Os03g08410	K01580+K01580+K00485+K00485+K00485+K00485	https://www.genome.jp/dbget-bin/www_bget?ko00430
ko00350	Tyrosine metabolism	6/17	6/156	17/427	0.63478	0.965008	MEDP1015;MEDN1876;MEDP0316;MEDN0037;MEDN1402;MEDP0208	C04185+C05594+C05582+C03758+C10447+C00042	11/62	11/985	62/10463	0.0285358	0.173933	LOC_Os11g10480;LOC_Os02g07160;LOC_Os06g35540;LOC_Os11g42510;LOC_Os06g23140;LOC_Os08g04540;LOC_Os08g04560;LOC_Os03g09020;LOC_Os11g10520;LOC_Os05g43510;LOC_Os07g38440	K18857+K00457+K14455+K00815+K00276+K01593+K01593+K00121+K18857+K01593+K00276	https://www.genome.jp/dbget-bin/www_bget?ko00350
ko00591	Linoleic acid metabolism	6/7	6/156	7/427	0.0108662	0.239057	MW0056883;MEDN0400;MEDN1417;MEDN1144;MEDN0374;MEDN1426	C00157+C06426+C04717+C14767+C14827+C14833	6/26	6/985	26/10463	0.0306268	0.178192	LOC_Os03g49260;LOC_Os05g28770;LOC_Os03g49350;LOC_Os03g15460;LOC_Os03g52860;LOC_Os11g34440	K15718+K00454+K15718+K01047+K15718+K01047	https://www.genome.jp/dbget-bin/www_bget?ko00591
ko00901	Indole alkaloid biosynthesis	3/9	3/156	9/427	0.699857	0.965008	MW0000275;MW0000452;MW0000215	C09209+C06522+C01091	3/8	3/985	8/10463	0.0324673	0.180688	LOC_Os08g04540;LOC_Os08g04560;LOC_Os05g43510	K01593+K01593+K01593	https://www.genome.jp/dbget-bin/www_bget?ko00901
ko00053	Ascorbate and aldarate metabolism	4/7	4/156	7/427	0.224213	0.939559	MEDP1617;MW0103583;MW0107870;MEDN0538	C15923+C00096+C00800+C00029	14/89	14/985	89/10463	0.03791	0.202187	LOC_Os04g35520;LOC_Os06g36560;LOC_Os09g26880;LOC_Os12g25690;LOC_Os08g05570;LOC_Os02g49720;LOC_Os08g02230;LOC_Os10g28320;LOC_Os04g45720;LOC_Os10g36390;LOC_Os02g03210;LOC_Os04g49250;LOC_Os02g34810;LOC_Os05g38230	K00434+K00469+K14085+K00012+K08232+K00128+K00103+K17744+K00128+K00423+K00103+K00012+K00434+K00002	https://www.genome.jp/dbget-bin/www_bget?ko00053
ko00950	Isoquinoline alkaloid biosynthesis	2/12	2/156	12/427	0.968029	0.979156	MEDN0037;MW0000172	C03758+C09390	7/35	7/985	35/10463	0.0416773	0.213388	LOC_Os06g35540;LOC_Os11g42510;LOC_Os06g23140;LOC_Os08g04540;LOC_Os08g04560;LOC_Os05g43510;LOC_Os07g38440	K14455+K00815+K00276+K01593+K01593+K01593+K00276	https://www.genome.jp/dbget-bin/www_bget?ko00950
ko00360	Phenylalanine metabolism	3/10	3/156	10/427	0.773304	0.965008	MEDL02347;MEDP0129;MEDP0208	C00079+C05332+C00042	11/67	11/985	67/10463	0.0471364	0.232056	LOC_Os04g02754;LOC_Os02g07160;LOC_Os04g10434;LOC_Os06g35540;LOC_Os11g42510;LOC_Os06g23140;LOC_Os08g04540;LOC_Os08g04560;LOC_Os09g16580;LOC_Os05g43510;LOC_Os07g38440	K01426+K00457+K01426+K14455+K00815+K00276+K01593+K01593+K01426+K01593+K00276	https://www.genome.jp/dbget-bin/www_bget?ko00360
ko00330	Arginine and proline metabolism	1/6	1/156	6/427	0.935972	0.974905	MEDP0022	C00148	13/85	13/985	85/10463	0.0537897	0.255003	LOC_Os06g33710;LOC_Os02g15550;LOC_Os03g58890;LOC_Os09g26880;LOC_Os04g02754;LOC_Os04g53190;LOC_Os04g10434;LOC_Os02g49720;LOC_Os06g35540;LOC_Os05g43830;LOC_Os04g45720;LOC_Os01g62900;LOC_Os09g16580	K00797+K00797+K00472+K14085+K01426+K17839+K01426+K00128+K14455+K01259+K00128+K12657+K01426	https://www.genome.jp/dbget-bin/www_bget?ko00330
ko00250	Alanine, aspartate and glutamate metabolism	5/7	5/156	7/427	0.0648841	0.57098	MEDN0198;MEDP0054;MW0103482;MEDP0208;MEDN0704	C00158+C00064+C03794+C00042+C00036	12/78	12/985	78/10463	0.0599868	0.274226	LOC_Os03g18130;LOC_Os10g25130;LOC_Os03g07570;LOC_Os04g56400;LOC_Os03g50490;LOC_Os03g58170;LOC_Os04g37500;LOC_Os03g13300;LOC_Os06g35540;LOC_Os08g39300;LOC_Os04g52440;LOC_Os03g18120	K01953+K00814+K00827+K01915+K01915+K01953+K01580+K01580+K14455+K00830+K16871+K01953	https://www.genome.jp/dbget-bin/www_bget?ko00250
ko00130	Ubiquinone and other terpenoid-quinone biosynthesis	2/8	2/156	8/427	0.854911	0.965008	MW0061670;MEDL02140	C03313+C00156	14/96	14/985	96/10463	0.0649352	0.285669	LOC_Os05g42190;LOC_Os08g14760;LOC_Os02g07160;LOC_Os08g43430;LOC_Os07g17970;LOC_Os02g26810;LOC_Os03g57640;LOC_Os06g05910;LOC_Os11g42510;LOC_Os08g37040;LOC_Os01g47350;LOC_Os02g26770;LOC_Os09g28660;LOC_Os08g03630	K03809+K01904+K00457+K17872+K01904+K00487+K17872+K00591+K00815+K17872+K01661+K00487+K17872+K14760	https://www.genome.jp/dbget-bin/www_bget?ko00130
ko00906	Carotenoid biosynthesis	5/10	5/156	10/427	0.281119	0.965008	MW0054460;MW0015435;MW0016109;MW0015831;MW0052883	C08601+C08606+C08591+C08579+C00448	11/71	11/985	71/10463	0.0669537	0.285669	LOC_Os07g05940;LOC_Os09g38320;LOC_Os05g01120;LOC_Os04g37619;LOC_Os03g44380;LOC_Os10g38940;LOC_Os01g54270;LOC_Os07g18154;LOC_Os08g36860;LOC_Os07g30960;LOC_Os03g05900	K09840+K02291+K09843+K09838+K09840+K15746+K17913+K09842+K09843+K09838+K09838	https://www.genome.jp/dbget-bin/www_bget?ko00906
ko00909	Sesquiterpenoid and triterpenoid biosynthesis	2/2	2/156	2/427	0.132929	0.824415	MW0052877;MW0052883	C03461+C00448	4/18	4/985	18/10463	0.082324	0.329296	LOC_Os03g12900;LOC_Os03g08624;LOC_Os11g18366;LOC_Os06g28820	K00511+K15891+K19011+K19011	https://www.genome.jp/dbget-bin/www_bget?ko00909
ko00620	Pyruvate metabolism	3/4	3/156	4/427	0.140525	0.824415	MEDP0208;MEDN0704;MEDN0325	C00042+C00036+C00186	16/118	16/985	118/10463	0.0866639	0.336151	LOC_Os03g31750;LOC_Os06g13720;LOC_Os10g13700;LOC_Os09g21230;LOC_Os09g26880;LOC_Os11g10480;LOC_Os03g04130;LOC_Os02g49720;LOC_Os06g01590;LOC_Os05g09440;LOC_Os04g45720;LOC_Os01g54030;LOC_Os03g09020;LOC_Os04g46560;LOC_Os11g10520;LOC_Os05g38230	K01006+K00161+K01610+K01895+K14085+K18857+K01913+K00128+K00016+K00029+K00128+K00029+K00121+K00025+K18857+K00002	https://www.genome.jp/dbget-bin/www_bget?ko00620
ko00944	Flavone and flavonol biosynthesis	2/7	2/156	7/427	0.793621	0.965008	MW0138571;FDATN01339	C04199+C12628	5/26	5/985	26/10463	0.0915412	0.344626	LOC_Os10g17260;LOC_Os03g59030;LOC_Os07g10240;LOC_Os10g10720;LOC_Os07g47550	K05280+K22772+K22772+K05280+K22772	https://www.genome.jp/dbget-bin/www_bget?ko00944
ko00650	Butanoate metabolism	3/7	3/156	7/427	0.503299	0.965008	MW0114026;MEDP1465;MEDP0208	C01412+C03046+C00042	6/36	6/985	36/10463	0.117466	0.425039	LOC_Os09g34960;LOC_Os03g04130;LOC_Os04g37500;LOC_Os03g13300;LOC_Os04g31960;LOC_Os04g52440	K01641+K01913+K01580+K01580+K01652+K16871	https://www.genome.jp/dbget-bin/www_bget?ko00650
ko00999	Biosynthesis of various plant secondary metabolites	8/25	8/156	25/427	0.754588	0.965008	MEDL02347;MEDL02183;MW0155568;MEDL02184;MW0053624;MW0114088;MW0052883;MEDN0704	C00079+C00841+C17055+C01557+C20778+C05839+C00448+C00036	17/133	17/985	133/10463	0.119542	0.425039	LOC_Os03g19420;LOC_Os02g03870;LOC_Os03g19427;LOC_Os07g07410;LOC_Os03g55050;LOC_Os02g51930;LOC_Os03g11420;LOC_Os03g58290;LOC_Os04g37480;LOC_Os11g25454;LOC_Os09g31430;LOC_Os02g36810;LOC_Os07g13660;LOC_Os07g46280;LOC_Os01g59840;LOC_Os03g58300;LOC_Os07g30330	K05953+K05349+K05953+K18054+K13227+K13227+K01188+K13222+K22374+K13227+K01188+K13227+K13227+K05350+K01188+K13222+K13227	https://www.genome.jp/dbget-bin/www_bget?ko00999
ko00908	Zeatin biosynthesis	4/7	4/156	7/427	0.224213	0.939559	MEDN0153;MEDTN02215;MEDN0538;MEDN1387	C00020+C00002+C00029+C00979	12/89	12/985	89/10463	0.129414	0.442127	LOC_Os09g16090;LOC_Os04g44250;novel.403;LOC_Os09g16110;LOC_Os02g57810;LOC_Os05g42070;LOC_Os06g17020;LOC_Os07g11050;LOC_Os02g11640;LOC_Os06g17250;LOC_Os06g08830;LOC_Os06g39070	K13496+K13496+K00279+K13496+K10717+K13496+K13496+K10760+K13496+K13496+K13496+K13496	https://www.genome.jp/dbget-bin/www_bget?ko00908
ko00945	Stilbenoid, diarylheptanoid and gingerol biosynthesis	1/5	1/156	5/427	0.898422	0.965008	MW0000973	C10462	8/58	8/985	58/10463	0.175494	0.546828	LOC_Os02g26810;LOC_Os11g32620;LOC_Os06g08610;LOC_Os07g31770;LOC_Os02g26770;LOC_Os08g10420;LOC_Os11g42370;LOC_Os04g51990	K00487+K17212+K13065+K17212+K00487+K13065+K13065+K13065	https://www.genome.jp/dbget-bin/www_bget?ko00945
ko00500	Starch and sucrose metabolism	3/8	3/156	8/427	0.60975	0.965008	MEDL02396;MEDN0538;MEDN0224	C00089+C00029+C01083	40/366	40/985	366/10463	0.177952	0.546828	LOC_Os07g35560;LOC_Os03g22120;LOC_Os08g31630;LOC_Os02g03870;LOC_Os03g25790;LOC_Os07g22930;LOC_Os06g51084;LOC_Os08g36910;LOC_Os02g54820;LOC_Os03g45390;LOC_Os10g41550;LOC_Os05g50380;LOC_Os06g11840;LOC_Os06g34020;LOC_Os01g14140;LOC_Os03g11420;LOC_Os06g06560;LOC_Os07g43160;LOC_Os08g34580;LOC_Os09g12660;LOC_Os02g03120;LOC_Os04g56920;LOC_Os05g09500;LOC_Os01g55820;LOC_Os09g31430;LOC_Os10g07290;LOC_Os10g…	K19891+K00695+K01087+K05349+K19892+K13679+K00700+K01176+K16055+K19893+K01177+K00975+K01087+K19891+K19891+K01188+K00703+K01087+K16055+K00975+K01179+K01193+K00844+K19892+K01188+K19891+K01835+K01179+K19891+K01193+K19891+K05350+K01176+K01188+K19891+K00844+K01179+K00695+K01179+K01179	https://www.genome.jp/dbget-bin/www_bget?ko00500
ko00232	Caffeine metabolism	3/9	3/156	9/427	0.699857	0.965008	MEDL02259;MEDL00926;MW0015222	C07481+C13747+C16352	1/2	1/985	2/10463	0.179428	0.546828	LOC_Os01g64520	K00365	https://www.genome.jp/dbget-bin/www_bget?ko00232
ko00710	Carbon fixation by Calvin cycle	2/6	2/156	6/427	0.710672	0.965008	MEDN0704;MEDN0461	C00036+C05382	12/96	12/985	96/10463	0.18997	0.565493	LOC_Os03g31750;LOC_Os08g03290;LOC_Os10g25130;LOC_Os06g45710;LOC_Os10g13700;LOC_Os05g36270;LOC_Os04g19740;LOC_Os08g02700;LOC_Os06g35540;LOC_Os05g09440;LOC_Os01g54030;LOC_Os04g46560	K01006+K00134+K00814+K00927+K01610+K03841+K00615+K01623+K14455+K00029+K00029+K00025	https://www.genome.jp/dbget-bin/www_bget?ko00710
ko00410	beta-Alanine metabolism	1/4	1/156	4/427	0.839073	0.965008	MEDN0841	C02642	8/60	8/985	60/10463	0.199803	0.581244	LOC_Os09g26880;LOC_Os04g53190;LOC_Os04g37500;LOC_Os03g13300;LOC_Os02g49720;LOC_Os06g23140;LOC_Os04g45720;LOC_Os07g38440	K14085+K17839+K01580+K01580+K00128+K00276+K00128+K00276	https://www.genome.jp/dbget-bin/www_bget?ko00410
ko00061	Fatty acid biosynthesis	1/5	1/156	5/427	0.898422	0.965008	MEDN0380	C08362	8/62	8/985	62/10463	0.225379	0.613799	LOC_Os10g31780;LOC_Os01g65830;LOC_Os07g07450;LOC_Os05g04170;LOC_Os12g07110;LOC_Os10g24800;LOC_Os02g30200;LOC_Os02g30060	K00059+K03921+K00059+K01897+K01897+K02372+K03921+K00059	https://www.genome.jp/dbget-bin/www_bget?ko00061
ko02010	ABC transporters	12/30	12/156	30/427	0.410432	0.965008	MEDP0022;MEDL02396;MEDL00009;MEDP0054;MEDL02347;MEDP1606;MEDP0232;MEDP0514;MEDP0457;MEDN0236;MEDN0224;MW0144923	C00148+C00089+C00183+C00064+C00079+C00330+C00140+C00378+C00430+C00492+C01083+C20572	16/144	16/985	144/10463	0.279472	0.730049	LOC_Os01g50080;LOC_Os01g07870;LOC_Os08g30770;LOC_Os04g49900;LOC_Os04g13210;LOC_Os08g43120;LOC_Os05g04610;LOC_Os04g11820;LOC_Os01g08260;LOC_Os02g46680;LOC_Os12g22110;LOC_Os01g50070;LOC_Os12g22284;LOC_Os09g03939;LOC_Os11g22350;LOC_Os02g21750	K05658+K05674+K05681+K05674+K05674+K08711+K05658+K05681+K08711+K05658+K05681+K05658+K05681+K05681+K05681+K05658	https://www.genome.jp/dbget-bin/www_bget?ko02010
ko00280	Valine, leucine and isoleucine degradation	1/3	1/156	3/427	0.7454	0.965008	MEDL00009	C00183	7/57	7/985	57/10463	0.287623	0.736314	LOC_Os12g08260;LOC_Os03g12890;LOC_Os09g26880;LOC_Os09g34960;LOC_Os03g07570;LOC_Os02g49720;LOC_Os04g45720	K00166+K00826+K14085+K01641+K00827+K00128+K00128	https://www.genome.jp/dbget-bin/www_bget?ko00280
ko00780	Biotin metabolism	2/3	2/156	3/427	0.302452	0.965008	MW0049160;MW0146750	C01909+C05921	4/32	4/985	32/10463	0.355504	0.892245	LOC_Os10g31780;LOC_Os07g07450;LOC_Os10g24800;LOC_Os02g30060	K00059+K00059+K02372+K00059	https://www.genome.jp/dbget-bin/www_bget?ko00780
ko00040	Pentose and glucuronate interconversions	2/4	2/156	4/427	0.464379	0.965008	MW0107870;MEDN0538	C00800+C00029	15/143	15/985	143/10463	0.369335	0.893644	LOC_Os06g01760;LOC_Os12g25690;LOC_Os12g36810;LOC_Os07g41650;LOC_Os01g57854;LOC_Os05g20020;LOC_Os06g28670;LOC_Os01g22590;LOC_Os03g19610;LOC_Os04g49250;LOC_Os01g66710;LOC_Os11g07090;LOC_Os01g43490;LOC_Os05g50960;LOC_Os05g38230	K01213+K00012+K01184+K01051+K01051+K01184+K01184+K01184+K01051+K00012+K01184+K01051+K01184+K01184+K00002	https://www.genome.jp/dbget-bin/www_bget?ko00040
ko00340	Histidine metabolism	1/5	1/156	5/427	0.898422	0.965008	MEDN0403	C00785	3/23	3/985	23/10463	0.370025	0.893644	LOC_Os09g26880;LOC_Os02g49720;LOC_Os04g45720	K14085+K00128+K00128	https://www.genome.jp/dbget-bin/www_bget?ko00340
ko00100	Steroid biosynthesis	1/3	1/156	3/427	0.7454	0.965008	MW0052883	C00448	6/53	6/985	53/10463	0.381908	0.905265	LOC_Os03g12900;LOC_Os01g11340;LOC_Os02g51030;LOC_Os03g59290;LOC_Os05g12040;LOC_Os01g68179	K00511+K09832+K08242+K00559+K05917+K23558	https://www.genome.jp/dbget-bin/www_bget?ko00100
ko00260	Glycine, serine and threonine metabolism	2/8	2/156	8/427	0.854911	0.965008	MEDL02462;MEDP0457	C01005+C00430	10/95	10/985	95/10463	0.404556	0.917074	LOC_Os02g07410;LOC_Os09g26880;LOC_Os03g07570;LOC_Os09g12290;LOC_Os03g63330;LOC_Os09g32290;LOC_Os08g39300;LOC_Os06g23140;LOC_Os07g38440;LOC_Os03g21260	K02437+K14085+K00827+K12524+K00928+K00306+K00830+K00276+K00276+K15633	https://www.genome.jp/dbget-bin/www_bget?ko00260
ko01210	2-Oxocarboxylic acid metabolism	8/20	8/156	20/427	0.455754	0.965008	MEDN0198;MEDL00009;MEDP0065;MEDL02347;MEDN0704;MEDN0203;MEDN1245;MW0147511	C00158+C00183+C00624+C00079+C00036+C00417+C20653+C20581	10/96	10/985	96/10463	0.417647	0.917074	LOC_Os06g13720;LOC_Os10g25130;LOC_Os12g08260;LOC_Os03g12890;LOC_Os03g07570;LOC_Os03g63330;LOC_Os05g49760;LOC_Os06g35540;LOC_Os08g39300;LOC_Os04g31960	K00161+K00814+K00166+K00826+K00827+K00928+K00031+K14455+K00830+K01652	https://www.genome.jp/dbget-bin/www_bget?ko01210
ko00750	Vitamin B6 metabolism	3/3	3/156	3/427	0.0481671	0.57098	MW0126336;MEDP0054;MEDP0369	C00647+C00064+C00534	3/25	3/985	25/10463	0.422714	0.917074	LOC_Os02g13290;LOC_Os04g27060;LOC_Os10g37330	K13248+K05275+K05275	https://www.genome.jp/dbget-bin/www_bget?ko00750
ko00966	Glucosinolate biosynthesis	2/11	2/156	11/427	0.952748	0.974905	MEDL00009;MEDL02347	C00183+C00079	1/6	1/985	6/10463	0.447543	0.939108	LOC_Os03g12890	K00826	https://www.genome.jp/dbget-bin/www_bget?ko00966
ko00770	Pantothenate and CoA biosynthesis	4/8	4/156	8/427	0.32588	0.965008	MEDL00009;MEDN0442;MEDN0841;MW0154889	C00183+C00831+C02642+C01134	5/47	5/985	47/10463	0.457654	0.942062	LOC_Os03g12890;LOC_Os04g53190;LOC_Os02g49720;LOC_Os04g31960;LOC_Os04g45720	K00826+K17839+K00128+K01652+K00128	https://www.genome.jp/dbget-bin/www_bget?ko00770
ko01040	Biosynthesis of unsaturated fatty acids	2/9	2/156	9/427	0.899212	0.965008	MEDN0400;MW0148386	C06426+C06429	5/48	5/985	48/10463	0.476484	0.952967	LOC_Os01g65830;LOC_Os04g40730;LOC_Os07g23410;LOC_Os07g23430;LOC_Os02g30200	K03921+K10251+K10256+K10256+K03921	https://www.genome.jp/dbget-bin/www_bget?ko01040
ko00590	Arachidonic acid metabolism	5/14	5/156	14/427	0.6267	0.965008	MW0056883;MEDP1153;MW0012180;MEDN0774;MW0012046	C00157+C14748+C14822+C14749+C14782	2/17	2/985	17/10463	0.484919	0.954918	LOC_Os03g15460;LOC_Os11g34440	K01047+K01047	https://www.genome.jp/dbget-bin/www_bget?ko00590
ko00565	Ether lipid metabolism	1/1	1/156	1/427	0.36534	0.965008	MEDP0442	C00670	4/39	4/985	39/10463	0.507092	0.983451	LOC_Os11g38050;LOC_Os03g15460;LOC_Os11g34440;LOC_Os01g01190	K01114+K01047+K01047+K01114	https://www.genome.jp/dbget-bin/www_bget?ko00565
ko00230	Purine metabolism	14/33	14/156	33/427	0.290227	0.965008	MEDP0054;MEDN0153;MEDN1013;MEDN0163;MEDP1606;MW0144360;MW0103558;MEDTN02215;MW0103345;MW0103482;MW0148404;MEDL02309;MEDL00331;MW0103597	C00064+C00020+C00360+C00262+C00330+C00053+C04734+C00002+C00362+C03794+C01260+C00130+C01367+C00104	14/149	14/985	149/10463	0.544573	1	LOC_Os01g64520;LOC_Os12g09540;LOC_Os03g18630;LOC_Os04g46280;LOC_Os08g44300;LOC_Os12g02750;LOC_Os05g06940;LOC_Os10g11140;LOC_Os01g53820;LOC_Os04g01874;LOC_Os10g31930;LOC_Os12g02980;LOC_Os11g02774;LOC_Os12g13120	K00365+K01945+K27625+K26956+K01517+K01522+K00951+K01835+K00939+K27625+K01519+K14641+K01522+K01522	https://www.genome.jp/dbget-bin/www_bget?ko00230
ko00220	Arginine biosynthesis	3/7	3/156	7/427	0.503299	0.965008	MEDP0054;MEDP0065;MEDN0010	C00064+C00624+C00327	4/41	4/985	41/10463	0.547603	1	LOC_Os10g25130;LOC_Os04g56400;LOC_Os03g50490;LOC_Os06g35540	K00814+K01915+K01915+K14455	https://www.genome.jp/dbget-bin/www_bget?ko00220
ko00910	Nitrogen metabolism	1/3	1/156	3/427	0.7454	0.965008	MEDP0054	C00064	7/74	7/985	74/10463	0.55296	1	LOC_Os02g02190;LOC_Os02g02170;LOC_Os04g56400;LOC_Os03g50490;LOC_Os02g53130;LOC_Os08g32840;LOC_Os04g33660	K02575+K02575+K01915+K01915+K10534+K01674+K01674	https://www.genome.jp/dbget-bin/www_bget?ko00910
ko00660	C5-Branched dibasic acid metabolism	1/3	1/156	3/427	0.7454	0.965008	MEDN0203	C00417	1/9	1/985	9/10463	0.589428	1	LOC_Os04g31960	K01652	https://www.genome.jp/dbget-bin/www_bget?ko00660
ko00562	Inositol phosphate metabolism	1/2	1/156	2/427	0.59775	0.965008	MW0114628	C04062	10/110	10/985	110/10463	0.594647	1	LOC_Os09g23140;LOC_Os06g36560;LOC_Os11g38050;LOC_Os03g51610;LOC_Os03g13520;LOC_Os01g08780;LOC_Os08g32960;LOC_Os01g01190;LOC_Os02g26720;LOC_Os02g51600	K24221+K00469+K01114+K00913+K24221+K24221+K24221+K01114+K00913+K24221	https://www.genome.jp/dbget-bin/www_bget?ko00562
ko00630	Glyoxylate and dicarboxylate metabolism	6/7	6/156	7/427	0.0108662	0.239057	MEDN0198;MEDP0054;MW0104839;MEDP0208;MEDN0704;MEDN0203	C00158+C00064+C00988+C00042+C00036+C00417	12/133	12/985	133/10463	0.605764	1	LOC_Os04g58710;LOC_Os02g07410;LOC_Os09g21230;LOC_Os02g02400;LOC_Os03g04130;LOC_Os12g08760;LOC_Os04g56400;LOC_Os03g50490;LOC_Os07g34520;LOC_Os08g39300;LOC_Os03g03910;LOC_Os04g46560	K22133+K02437+K01895+K03781+K01913+K01637+K01915+K01915+K01637+K00830+K03781+K00025	https://www.genome.jp/dbget-bin/www_bget?ko00630
ko00400	Phenylalanine, tyrosine and tryptophan biosynthesis	3/9	3/156	9/427	0.699857	0.965008	MEDL02347;MEDL01892;MEDN1245	C00079+C00587+C20653	6/68	6/985	68/10463	0.62752	1	LOC_Os04g54800;LOC_Os06g35540;LOC_Os03g17730;LOC_Os11g42510;LOC_Os06g49520;LOC_Os09g08130	K00891+K14455+K05359+K00815+K15227+K01609	https://www.genome.jp/dbget-bin/www_bget?ko00400
ko01250	Biosynthesis of nucleotide sugars	13/18	13/156	18/427	0.00184452	0.162318	MW0114000;MEDP0067;MEDP0232;MW0103681;MW0148768;MW0148736;MW0148779;MW0103583;MEDN0538;MEDN0461;MEDP0068;MEDN1221;MW0112794	C02985+C00645+C00140+C00052+C18034+C18033+C12321+C00096+C00029+C05382+C00270+C00275+C20934	10/113	10/985	113/10463	0.629378	1	LOC_Os06g36560;LOC_Os12g25690;LOC_Os05g50380;LOC_Os09g35800;LOC_Os09g12660;LOC_Os05g09500;LOC_Os10g11140;LOC_Os06g08620;LOC_Os04g49250;LOC_Os01g53920	K00469+K00012+K00975+K01784+K00975+K00844+K01835+K13379+K00012+K00844	https://www.genome.jp/dbget-bin/www_bget?ko01250
ko00860	Porphyrin metabolism	1/4	1/156	4/427	0.839073	0.965008	MEDP0457	C00430	6/69	6/985	69/10463	0.641868	1	LOC_Os01g44050;LOC_Os10g40020;LOC_Os04g58200;LOC_Os02g54980;LOC_Os02g51080;LOC_Os10g25020	K02303+K00218+K00218+K13071+K10960+K13545	https://www.genome.jp/dbget-bin/www_bget?ko00860
ko00600	Sphingolipid metabolism	1/5	1/156	5/427	0.898422	0.965008	MEDL00101	C00836	6/69	6/985	69/10463	0.641868	1	LOC_Os10g35070;LOC_Os01g07250;LOC_Os08g37130;novel.126;LOC_Os01g70360;LOC_Os07g38790	K07407+K12382+K04708+K12373+K00654+K12373	https://www.genome.jp/dbget-bin/www_bget?ko00600
ko00030	Pentose phosphate pathway	3/9	3/156	9/427	0.699857	0.965008	MEDN0239;MEDN0461;MW0114218	C00257+C05382+C01236	6/71	6/985	71/10463	0.66955	1	LOC_Os02g48360;LOC_Os05g36270;LOC_Os04g19740;LOC_Os05g10650;LOC_Os08g02700;LOC_Os10g11140	K00895+K03841+K00615+K00850+K01623+K01835	https://www.genome.jp/dbget-bin/www_bget?ko00030
ko00290	Valine, leucine and isoleucine biosynthesis	1/2	1/156	2/427	0.59775	0.965008	MEDL00009	C00183	2/24	2/985	24/10463	0.674643	1	LOC_Os03g12890;LOC_Os04g31960	K00826+K01652	https://www.genome.jp/dbget-bin/www_bget?ko00290
ko00730	Thiamine metabolism	2/6	2/156	6/427	0.710672	0.965008	MEDP0514;MEDP0882	C00378+C01081	2/24	2/985	24/10463	0.674643	1	LOC_Os05g33840;LOC_Os01g53820	K01662+K00939	https://www.genome.jp/dbget-bin/www_bget?ko00730
ko00920	Sulfur metabolism	3/4	3/156	4/427	0.140525	0.824415	MW0144360;MEDP0208;MEDN1387	C00053+C00042+C00979	4/49	4/985	49/10463	0.689955	1	LOC_Os04g08350;LOC_Os01g68770;LOC_Os10g25950;LOC_Os10g26010	K13034+K17285+K01739+K01739	https://www.genome.jp/dbget-bin/www_bget?ko00920
ko00561	Glycerolipid metabolism	1/4	1/156	4/427	0.839073	0.965008	MEDN0538	C00029	10/120	10/985	120/10463	0.703882	1	LOC_Os01g47580;LOC_Os10g35070;LOC_Os01g63580;LOC_Os09g26880;LOC_Os03g51010;LOC_Os02g49720;LOC_Os01g04920;LOC_Os04g45720;novel.138;LOC_Os05g38230	K18693+K07407+K13508+K14085+K01054+K00128+K06119+K00128+K01054+K00002	https://www.genome.jp/dbget-bin/www_bget?ko00561
ko00460	Cyanoamino acid metabolism	4/9	4/156	9/427	0.429537	0.965008	MEDL00009;MEDL02347;MW0113931;MEDL01997	C00183+C00079+C08325+C00844	9/110	9/985	110/10463	0.719251	1	LOC_Os04g08350;LOC_Os02g03870;LOC_Os03g11420;LOC_Os02g42350;LOC_Os09g31430;LOC_Os07g46280;LOC_Os12g32850;LOC_Os03g63310;LOC_Os01g59840	K13034+K05349+K01188+K13035+K01188+K05350+K13029+K13029+K01188	https://www.genome.jp/dbget-bin/www_bget?ko00460
ko00900	Terpenoid backbone biosynthesis	6/9	6/156	9/427	0.0635354	0.57098	MW0052877;MW0015654;MEDP1614;MW0052879;MW0103902;MW0052883	C03461+C04216+C00129+C06081+C01107+C00448	5/63	5/985	63/10463	0.719451	1	LOC_Os09g34960;LOC_Os06g07120;LOC_Os05g33840;LOC_Os03g08624;LOC_Os02g51080	K01641+K11778+K01662+K15891+K10960	https://www.genome.jp/dbget-bin/www_bget?ko00900
ko01230	Biosynthesis of amino acids	11/27	11/156	27/427	0.390831	0.965008	MEDL02462;MEDN0198;MEDP0022;MEDL00009;MEDP0054;MEDP0065;MEDL02347;MEDN0010;MEDN0704;MEDN1387;MEDN0461	C01005+C00158+C00148+C00183+C00064+C00624+C00079+C00327+C00036+C00979+C05382	27/314	27/985	314/10463	0.720473	1	LOC_Os03g18130;LOC_Os04g08350;LOC_Os08g03290;LOC_Os10g25130;LOC_Os06g45710;LOC_Os03g12890;LOC_Os04g54800;LOC_Os04g19740;LOC_Os09g12290;LOC_Os03g63330;LOC_Os04g56400;LOC_Os03g09910;LOC_Os03g50490;LOC_Os05g10650;LOC_Os03g58170;LOC_Os08g02700;LOC_Os05g49760;LOC_Os06g35540;LOC_Os03g17730;LOC_Os04g31960;LOC_Os10g25950;LOC_Os01g62900;LOC_Os06g49520;LOC_Os09g08130;LOC_Os10g26010;LOC_Os03g18120;LOC_Os03g…	K01953+K13034+K00134+K00814+K00927+K00826+K00891+K00615+K12524+K00928+K01915+K10206+K01915+K00850+K01953+K01623+K00031+K14455+K05359+K01652+K01739+K12657+K15227+K01609+K01739+K01953+K15633	https://www.genome.jp/dbget-bin/www_bget?ko01230
ko00310	Lysine degradation	1/6	1/156	6/427	0.935972	0.974905	MEDP0208	C00042	5/65	5/985	65/10463	0.744858	1	LOC_Os09g26880;LOC_Os02g54254;LOC_Os02g49720;LOC_Os09g32290;LOC_Os04g45720	K14085+K14157+K00128+K00306+K00128	https://www.genome.jp/dbget-bin/www_bget?ko00310
ko00640	Propanoate metabolism	2/4	2/156	4/427	0.464379	0.965008	MEDP0208;MEDN0325	C00042+C00186	3/41	3/985	41/10463	0.755524	1	LOC_Os12g08260;LOC_Os09g21230;LOC_Os06g01590	K00166+K01895+K00016	https://www.genome.jp/dbget-bin/www_bget?ko00640
ko00760	Nicotinate and nicotinamide metabolism	3/10	3/156	10/427	0.773304	0.965008	MEDL02050;MEDP0180;MEDP0208	C00153+C00455+C00042	2/29	2/985	29/10463	0.772216	1	LOC_Os04g46280;LOC_Os05g33630	K26956+K01240	https://www.genome.jp/dbget-bin/www_bget?ko00760
ko00052	Galactose metabolism	5/13	5/156	13/427	0.54767	0.965008	MEDL02396;MW0103681;MEDN0538;MEDN0236;MEDN1534	C00089+C00052+C00029+C00492+C00795	13/169	13/985	169/10463	0.815984	1	LOC_Os03g20120;LOC_Os07g10840;LOC_Os10g35070;LOC_Os07g48830;LOC_Os06g07600;LOC_Os05g10650;LOC_Os09g35800;LOC_Os04g56920;LOC_Os05g09500;LOC_Os10g11140;LOC_Os08g06210;LOC_Os04g38540;LOC_Os01g53920	K18819+K06617+K07407+K18819+K06617+K00850+K01784+K01193+K00844+K01835+K01193+K01785+K00844	https://www.genome.jp/dbget-bin/www_bget?ko00052
ko00051	Fructose and mannose metabolism	4/7	4/156	7/427	0.224213	0.939559	MW0114000;MW0103583;MEDN0325;MEDN1221	C02985+C00096+C00186+C00275	6/87	6/985	87/10463	0.839945	1	LOC_Os02g48360;LOC_Os05g36270;LOC_Os05g10650;LOC_Os08g02700;LOC_Os05g09500;LOC_Os01g53920	K00895+K03841+K00850+K01623+K00844+K00844	https://www.genome.jp/dbget-bin/www_bget?ko00051
ko00020	Citrate cycle (TCA cycle)	4/4	4/156	4/427	0.0173811	0.254922	MEDN0198;MEDP0208;MEDN0704;MEDN0203	C00158+C00042+C00036+C00417	4/67	4/985	67/10463	0.88712	1	LOC_Os06g13720;LOC_Os10g13700;LOC_Os05g49760;LOC_Os04g46560	K00161+K01610+K00031+K00025	https://www.genome.jp/dbget-bin/www_bget?ko00020
ko04070	Phosphatidylinositol signaling system	1/4	1/156	4/427	0.839073	0.965008	MW0114628	C04062	5/83	5/985	83/10463	0.901606	1	LOC_Os03g20370;LOC_Os07g48780;LOC_Os03g51610;LOC_Os02g26720;LOC_Os11g37550	K02183+K02183+K00913+K00913+K02183	https://www.genome.jp/dbget-bin/www_bget?ko04070
ko01200	Carbon metabolism	9/19	9/156	19/427	0.221509	0.939559	MEDL02462;MEDN0198;MW0104839;MEDP0208;MEDN0239;MEDN0704;MEDN1387;MEDN0461;MW0114218	C01005+C00158+C00988+C00042+C00257+C00036+C00979+C05382+C01236	28/378	28/985	378/10463	0.930483	1	LOC_Os03g31750;LOC_Os04g08350;LOC_Os06g13720;LOC_Os08g03290;LOC_Os10g25130;LOC_Os06g45710;LOC_Os10g13700;LOC_Os02g07410;LOC_Os09g21230;LOC_Os02g02400;LOC_Os05g36270;LOC_Os03g04130;LOC_Os12g08760;LOC_Os04g19740;LOC_Os05g10650;LOC_Os07g34520;LOC_Os08g02700;LOC_Os05g49760;LOC_Os06g35540;LOC_Os05g09440;LOC_Os08g39300;LOC_Os05g09500;LOC_Os01g54030;LOC_Os03g09020;LOC_Os03g03910;LOC_Os04g46560;LOC_Os01g…	K01006+K13034+K00161+K00134+K00814+K00927+K01610+K02437+K01895+K03781+K03841+K01913+K01637+K00615+K00850+K01637+K01623+K00031+K14455+K00029+K00830+K00844+K00029+K00121+K03781+K00025+K00844+K15633	https://www.genome.jp/dbget-bin/www_bget?ko01200
ko01232	Nucleotide metabolism	15/33	15/156	33/427	0.178299	0.922962	MW0103675;MW0103525;MEDP0054;MEDN0153;MEDN1013;MEDN0163;MEDP1606;MEDTN02215;MW0103345;MW0103482;MEDN0419;MEDL02309;MEDN0609;MW0103352;MW0103597	C00364+C01346+C00064+C00020+C00360+C00262+C00330+C00002+C00362+C03794+C00105+C00130+C00075+C00365+C00104	5/100	5/985	100/10463	0.96486	1	LOC_Os06g02000;LOC_Os05g33630;LOC_Os01g53820;LOC_Os10g31930;LOC_Os12g02980	K13800+K01240+K00939+K01519+K14641	https://www.genome.jp/dbget-bin/www_bget?ko01232
ko01240	Biosynthesis of cofactors	24/54	24/156	54/427	0.127548	0.824415	MW0106444;MEDN0198;MEDL00009;MEDP0054;MEDN0153;MEDL02050;MW0061670;MEDP0514;MW0049160;MW0103639;MEDP0457;MW0103583;MEDTN02215;MEDP0882;MW0103482;MW0107870;MEDN0538;MEDL02140;MW0154889;MEDN0704;MEDN0419;MEDL02309;MEDN0609;MEDN1221	C00415+C00158+C00183+C00064+C00020+C00153+C03313+C00378+C01909+C01103+C00430+C00096+C00002+C01081+C03794+C00800+C00029+C00156+C01134+C00036+C00105+C00130+C00075+C00275	28/402	28/985	402/10463	0.968484	1	LOC_Os10g31780;LOC_Os03g12890;LOC_Os05g42190;LOC_Os12g25690;LOC_Os06g02000;LOC_Os02g07160;LOC_Os08g43430;LOC_Os02g49720;LOC_Os08g02230;LOC_Os07g07450;LOC_Os03g57640;LOC_Os06g05910;LOC_Os10g28320;LOC_Os01g44050;LOC_Os05g15530;LOC_Os08g37040;LOC_Os01g15620;LOC_Os04g45720;LOC_Os02g03210;LOC_Os01g53820;LOC_Os01g47350;LOC_Os02g13290;LOC_Os09g28660;LOC_Os04g49250;LOC_Os10g24800;LOC_Os08g03630;LOC_Os05g…	K00059+K00826+K03809+K00012+K13800+K00457+K17872+K00128+K00103+K00059+K17872+K00591+K17744+K02303+K18482+K17872+K01633+K00128+K00103+K00939+K01661+K13248+K17872+K00012+K02372+K14760+K00002+K00059	https://www.genome.jp/dbget-bin/www_bget?ko01240
ko00240	Pyrimidine metabolism	8/18	8/156	18/427	0.316689	0.965008	MW0103675;MW0103525;MEDP0054;MW0103639;MEDN0841;MEDN0419;MEDN0609;MW0103352	C00364+C01346+C00064+C01103+C02642+C00105+C00075+C00365	3/82	3/985	82/10463	0.986581	1	LOC_Os06g02000;LOC_Os05g33630;LOC_Os12g02980	K13800+K01240+K14641	https://www.genome.jp/dbget-bin/www_bget?ko00240
ko00195	Photosynthesis	1/2	1/156	2/427	0.59775	0.965008	MEDTN02215	C00002	7/146	7/985	146/10463	0.987362	1	LOC_Os02g15560;LOC_Os03g57120;LOC_Os06g01840;LOC_Os01g64960;LOC_Os01g64120;LOC_Os03g17070;LOC_Os07g05360	K02636+K02641+K02641+K03542+K02639+K02109+K03541	https://www.genome.jp/dbget-bin/www_bget?ko00195
ko00790	Folate biosynthesis	2/6	2/156	6/427	0.710672	0.965008	MW0106444;MEDL02140	C00415+C00156	2/83	2/985	83/10463	0.997441	1	LOC_Os05g15530;LOC_Os01g15620	K18482+K01633	https://www.genome.jp/dbget-bin/www_bget?ko00790
ko00564	Glycerophospholipid metabolism	5/18	5/156	18/427	0.850913	0.965008	MEDP0338;MW0056883;MEDP0442;MW0141993;MW0142636	C04230+C00157+C00670+C20466+C04590	18/338	18/985	338/10463	0.998176	1	LOC_Os01g47580;LOC_Os02g31030;LOC_Os05g49840;LOC_Os01g63580;LOC_Os02g33710;LOC_Os12g41980;LOC_Os11g38050;LOC_Os12g41970;LOC_Os01g42690;LOC_Os03g15460;LOC_Os03g40670;LOC_Os08g44300;LOC_Os08g04800;LOC_Os01g51360;LOC_Os01g46250;LOC_Os11g34440;LOC_Os01g01190;LOC_Os12g27102	K18693+K18696+K16818+K13508+K25193+K16818+K01114+K16818+K06130+K01047+K01126+K01517+K16818+K16818+K16818+K01047+K01114+K01126	https://www.genome.jp/dbget-bin/www_bget?ko00564
ko04148	Efferocytosis	4/15	4/156	15/427	0.861238	0.965008	MEDP0338;MEDTN02215;MEDN0325;MEDN0609	C04230+C00002+C00186+C00075	2/88	2/985	88/10463	0.998361	1	LOC_Os06g12790;LOC_Os05g50120	K04392+K04371	https://www.genome.jp/dbget-bin/www_bget?ko04148
ko00960	Tropane, piperidine and pyridine alkaloid biosynthesis	2/11	2/156	11/427	0.952748	0.974905	MEDL02347;MW0114753	C00079+C07475	13/309	13/985	309/10463	0.999854	1	LOC_Os06g35540;LOC_Os01g70540;LOC_Os11g42510;LOC_Os06g23140;LOC_Os11g25700;LOC_Os11g35930;LOC_Os04g01354;LOC_Os12g13490;LOC_Os01g37360;LOC_Os11g43360;LOC_Os11g43200;LOC_Os01g70525;LOC_Os07g38440	K14455+K08081+K00815+K00276+K08081+K00660+K00660+K08081+K08081+K08081+K08081+K08081+K00276	https://www.genome.jp/dbget-bin/www_bget?ko00960
ko00190	Oxidative phosphorylation	2/4	2/156	4/427	0.464379	0.965008	MEDTN02215;MEDP0208	C00002+C00042	5/220	5/985	220/10463	0.999996	1	novel.61;LOC_Os03g63930;LOC_Os03g48310;LOC_Os01g64670;LOC_Os03g17070	K03878+K03955+K01535+K01507+K02109	https://www.genome.jp/dbget-bin/www_bget?ko00190
