# Supplementary material
Source: Research Square preprint supplement (doi:10.21203/rs.3.rs-9447148/v1)
Supplement: Supplementary file 6 [file 650b4aecf0b388f1a1c56e12.xlsx]

## Sheet: Sheet1
Table S2 DEGs identified between root and shoot tissues under control conditions (CK_Root vs. CK_Shoot)
ID	baseMean	CK_Shoot	CK_Root	log2FoldChange	pvalue	padj	regulated
ChrUn.fgenesh.gene.96	2759.29	4642	876.58	-2.4044	0	0	down
LOC_Os01g01120	746.379	1375.42	117.338	-3.54567	0	0	down
LOC_Os01g01280	1295.91	2571.05	20.7645	-6.94968	0	0	down
LOC_Os01g01302	1332.84	2594.56	71.1158	-5.19974	0	0	down
LOC_Os01g01340	3097.46	6052.69	142.222	-5.41079	0	0	down
LOC_Os01g01710	4297.81	7080.83	1514.79	-2.22561	0	0	down
LOC_Os01g01790	2854.15	4509.42	1198.88	-1.91213	0	0	down
LOC_Os01g01870	1054.09	1984.97	123.218	-4.00305	0	0	down
LOC_Os01g02870	1502.56	2942.57	62.5495	-5.54646	0	0	down
LOC_Os01g02880	2789.08	1148.55	4429.61	1.94662	0	0	up
LOC_Os01g03020	1344.71	2437.93	251.489	-3.27715	0	0	down
LOC_Os01g03390	855.177	1547.28	163.072	-3.24223	0	0	down
LOC_Os01g03914	3845.98	841.182	6850.78	3.02546	0	0	up
LOC_Os01g04350	2642.94	4872.21	413.667	-3.55702	0	0	down
LOC_Os01g04650	3770.95	1753	5788.9	1.72366	0	0	up
LOC_Os01g05800	7164.42	13503.9	824.945	-4.03241	0	0	down
LOC_Os01g07090	1553.22	3051.78	54.662	-5.80525	0	0	down
LOC_Os01g07370	2451.47	4209.9	693.043	-2.60244	0	0	down
LOC_Os01g07530	2532.65	4208.05	857.26	-2.2951	0	0	down
LOC_Os01g07870	2408.85	4173.67	644.03	-2.69383	0	0	down
LOC_Os01g07970	1693.57	2991.72	395.426	-2.91827	0	0	down
LOC_Os01g08460	1130.66	2115.66	145.658	-3.85379	0	0	down
LOC_Os01g08510	2634.64	5071.04	198.231	-4.67251	0	0	down
LOC_Os01g09080	2021.28	20.4889	4022.07	7.61597	0	0	up
LOC_Os01g09300	4614.35	7961.77	1266.94	-2.65216	0	0	down
LOC_Os01g09510	3291.92	1140.77	5443.08	2.25438	0	0	up
LOC_Os01g09540	3039.22	5270.57	807.87	-2.70667	0	0	down
LOC_Os01g10210	1398.08	2699.52	96.638	-4.80233	0	0	down
LOC_Os01g10400	3328.21	6447.16	209.272	-4.95214	0	0	down
LOC_Os01g10890	701.721	1348.79	54.6514	-4.62729	0	0	down
LOC_Os01g11054	4796.64	8037.49	1555.79	-2.36909	0	0	down
LOC_Os01g11230	1881.01	3585.18	176.841	-4.34066	0	0	down
LOC_Os01g11414	5708.42	1610.02	9806.82	2.60663	0	0	up
LOC_Os01g11910	2440.48	446.9	4434.07	3.31099	0	0	up
LOC_Os01g11946	2330.54	4310.4	350.683	-3.61528	0	0	down
LOC_Os01g12080	1737.82	3023.38	452.269	-2.74207	0	0	down
LOC_Os01g12710	1145.52	1994.94	296.098	-2.75114	0	0	down
LOC_Os01g12810	4258.1	8500.4	15.7921	-9.08256	0	0	down
LOC_Os01g13090	1493.68	319.815	2667.55	3.05924	0	0	up
LOC_Os01g13480	2506.69	4935.84	77.5361	-5.99318	0	0	down
LOC_Os01g13690	3301.62	5373.7	1229.54	-2.12891	0	0	down
LOC_Os01g13770	1000.21	1851.07	149.358	-3.63271	0	0	down
LOC_Os01g15490	3357.39	5890.27	824.507	-2.83389	0	0	down
LOC_Os01g15610	2437.75	586.005	4289.5	2.87003	0	0	up
LOC_Os01g15830	6232.24	1027.35	11437.1	3.47643	0	0	up
LOC_Os01g15900	4650.16	8712.42	587.895	-3.89132	0	0	down
LOC_Os01g15970	1867.68	276.931	3458.43	3.64163	0	0	up
LOC_Os01g16170	907.415	1697.92	116.908	-3.86266	0	0	down
LOC_Os01g16450	1168.48	181.071	2155.88	3.57312	0	0	up
LOC_Os01g17150	1635.83	3252.11	19.5458	-7.39662	0	0	down
LOC_Os01g17170	5757.88	11422	93.7807	-6.92434	0	0	down
LOC_Os01g17214	1113.03	2182.1	43.9625	-5.63158	0	0	down
LOC_Os01g17240	1119.56	2190.19	48.9251	-5.48677	0	0	down
LOC_Os01g17390	4791.01	7552.74	2029.28	-1.89505	0	0	down
LOC_Os01g18050	7918.35	3122.09	12714.6	2.02561	0	0	up
LOC_Os01g18170	10138.2	126.056	20150.4	7.32147	0	0	up
LOC_Os01g18320	1050.72	1995.08	106.35	-4.23562	0	0	down
LOC_Os01g18670	5865.5	3011.47	8719.54	1.53395	0	0	up
LOC_Os01g18744	7844.37	458.945	15229.8	5.05189	0	0	up
LOC_Os01g18800	6604.86	10058.5	3151.23	-1.67461	0	0	down
LOC_Os01g19020	7837.2	2844.8	12829.6	2.1729	0	0	up
LOC_Os01g20110	768.708	1400.99	136.426	-3.35878	0	0	down
LOC_Os01g21250	7024.88	13846.9	202.854	-6.08557	0	0	down
LOC_Os01g21820	3663.86	6942.83	384.892	-4.17741	0	0	down
LOC_Os01g22640	1158.23	2125.53	190.938	-3.47558	0	0	down
LOC_Os01g22900	7758.67	14691.5	825.847	-4.15341	0	0	down
LOC_Os01g22980	1609.61	3192.53	26.7032	-6.89484	0	0	down
LOC_Os01g23680	2171.23	3740.78	601.682	-2.63777	0	0	down
LOC_Os01g24090	754.658	1441.7	67.618	-4.41582	0	0	down
LOC_Os01g25386	9139.57	15018.3	3260.85	-2.20285	0	0	down
LOC_Os01g25560	2117.78	491.005	3744.56	2.93091	0	0	up
LOC_Os01g25990	1600.95	3133.99	67.9206	-5.52965	0	0	down
LOC_Os01g26039	1675.47	3111.64	239.296	-3.69639	0	0	down
LOC_Os01g28989	3107.31	4897.21	1317.41	-1.89273	0	0	down
LOC_Os01g29409	1422.33	2429.52	415.138	-2.54899	0	0	down
LOC_Os01g29830	1156.63	2091.84	221.422	-3.2446	0	0	down
LOC_Os01g31110	2200.21	3798.15	602.281	-2.65567	0	0	down
LOC_Os01g32259	1388.89	2371.39	406.4	-2.55051	0	0	down
LOC_Os01g32330	2112.07	3405.88	818.271	-2.05648	0	0	down
LOC_Os01g37040	994.484	1816.36	172.605	-3.39666	0	0	down
LOC_Os01g37130	1480.48	2887.08	73.8747	-5.27791	0	0	down
LOC_Os01g37690	5907.36	10393.6	1421.09	-2.87157	0	0	down
LOC_Os01g38610	1280.6	2510.94	50.2571	-5.63225	0	0	down
LOC_Os01g40310	2305.27	4594.15	16.3834	-8.11471	0	0	down
LOC_Os01g40630	4282.95	7665.17	900.733	-3.08937	0	0	down
LOC_Os01g40710	1617.91	3174.27	61.5378	-5.68966	0	0	down
LOC_Os01g40870	7284.05	1274.68	13293.4	3.38224	0	0	up
LOC_Os01g41710	3155.27	6276.64	33.9038	-7.52576	0	0	down
LOC_Os01g41900	2899.64	5023.26	776.021	-2.69455	0	0	down
LOC_Os01g42410	1922.16	707.437	3136.89	2.14934	0	0	up
LOC_Os01g43070	763.842	1428.98	98.7075	-3.8611	0	0	down
LOC_Os01g43120	1520.16	2890.73	149.587	-4.27023	0	0	down
LOC_Os01g43150	6375.23	11796.5	953.937	-3.62808	0	0	down
LOC_Os01g43330	3731.86	6551.17	912.556	-2.84371	0	0	down
LOC_Os01g43870	4295.68	7223.9	1367.46	-2.40155	0	0	down
LOC_Os01g44210	3282.41	6327.45	237.361	-4.73295	0	0	down
LOC_Os01g45274	61796.2	116554	7038.58	-4.04966	0	0	down
LOC_Os01g45640	792.49	1504.41	80.5687	-4.22398	0	0	down
LOC_Os01g45750	3918.47	6525.73	1311.21	-2.31478	0	0	down
LOC_Os01g45914	34964.8	69100.7	828.868	-6.38122	0	0	down
LOC_Os01g45990	2821.17	716.974	4925.37	2.78026	0	0	up
LOC_Os01g46380	6896.72	3362.37	10431.1	1.63339	0	0	up
LOC_Os01g46610	12497.1	6814.69	18179.6	1.41554	0	0	up
LOC_Os01g46720	11199.3	16109.4	6289.21	-1.35662	0	0	down
LOC_Os01g47330	2022.01	3939.02	104.996	-5.23786	0	0	down
LOC_Os01g47350	1036.11	2039.68	32.5443	-5.98195	0	0	down
LOC_Os01g47580	1499.65	241.795	2757.5	3.51347	0	0	up
LOC_Os01g48300	941.625	1661.16	222.09	-2.90085	0	0	down
LOC_Os01g48380	1511.1	2703.26	318.93	-3.08162	0	0	down
LOC_Os01g48690	3238.53	6260.61	216.45	-4.85264	0	0	down
LOC_Os01g48850	1101.45	244.103	1958.79	3.00547	0	0	up
LOC_Os01g48990	3883.73	6976.26	791.203	-3.14085	0	0	down
LOC_Os01g49470	12153.2	19204.2	5102.2	-1.91195	0	0	down
LOC_Os01g50100	1234.44	2206.03	262.86	-3.06647	0	0	down
LOC_Os01g50160	2448.13	952.204	3944.06	2.05089	0	0	up
LOC_Os01g50460	5273	10458	87.9981	-6.87874	0	0	down
LOC_Os01g50760	1739.14	2892.4	585.879	-2.30284	0	0	down
LOC_Os01g50820	2459.34	23.4031	4895.28	7.70676	0	0	up
LOC_Os01g50930	869.554	1608.12	130.989	-3.6166	0	0	down
LOC_Os01g51360	2294.85	4372.08	217.618	-4.32042	0	0	down
LOC_Os01g51410	34033.5	56328.5	11738.5	-2.26265	0	0	down
LOC_Os01g51530	1134.26	2205.47	63.0457	-5.12927	0	0	down
LOC_Os01g51754	1543.26	2516.85	569.662	-2.14445	0	0	down
LOC_Os01g51890	1686.42	3085.18	287.666	-3.42405	0	0	down
LOC_Os01g52170	1826.72	3593.38	60.0555	-5.90415	0	0	down
LOC_Os01g52550	1592.19	2609.37	575.009	-2.1801	0	0	down
LOC_Os01g52640	6955.53	13049.1	862.01	-3.92205	0	0	down
LOC_Os01g53060	1482.59	2618.64	346.534	-2.91798	0	0	down
LOC_Os01g53800	2765.74	355.767	5175.71	3.8634	0	0	up
LOC_Os01g54540	3068.9	5934.07	203.725	-4.8727	0	0	down
LOC_Os01g55260	996.031	114.271	1877.79	4.03971	0	0	up
LOC_Os01g55570	1615.41	3197.86	32.9598	-6.57916	0	0	down
LOC_Os01g55670	1163.16	2264.36	61.9667	-5.20107	0	0	down
LOC_Os01g55830	20096.7	5820.03	34373.4	2.5621	0	0	up
LOC_Os01g56420	2807.02	63.6954	5550.34	6.44469	0	0	up
LOC_Os01g56780	6355.34	11897.4	813.274	-3.87162	0	0	down
LOC_Os01g57770	1747.63	196.923	3298.33	4.06759	0	0	up
LOC_Os01g58240	3238.08	558.089	5918.07	3.40677	0	0	up
LOC_Os01g58420	1389.41	2387.64	391.171	-2.60867	0	0	down
LOC_Os01g58470	1202.21	2351.53	52.8939	-5.47744	0	0	down
LOC_Os01g59060	1501.44	2940.88	62.0023	-5.57219	0	0	down
LOC_Os01g59080	2438.42	4855.75	21.0875	-7.84618	0	0	down
LOC_Os01g59530	1144.52	2192.61	96.4256	-4.50646	0	0	down
LOC_Os01g59570	2346.93	84.9884	4608.88	5.76115	0	0	up
LOC_Os01g60190	7422.42	3456.27	11388.6	1.72027	0	0	up
LOC_Os01g60280	4064.63	816.496	7312.76	3.16247	0	0	up
LOC_Os01g61120	3304.46	6128.94	479.972	-3.67521	0	0	down
LOC_Os01g61400	1617.54	2661.36	573.717	-2.21462	0	0	down
LOC_Os01g62070	4654.23	7748.42	1560.04	-2.31135	0	0	down
LOC_Os01g62300	4337.12	6631.2	2043.03	-1.69834	0	0	down
LOC_Os01g62440	1613.15	2831.92	394.38	-2.84054	0	0	down
LOC_Os01g62460	11904.3	18497.5	5311.03	-1.80026	0	0	down
LOC_Os01g62840	5252.57	9099.86	1405.28	-2.69432	0	0	down
LOC_Os01g62870	1122.51	1971.04	273.982	-2.84797	0	0	down
LOC_Os01g63180	1027.55	48.4911	2006.62	5.3745	0	0	up
LOC_Os01g63190	1643.95	2837.59	450.299	-2.6537	0	0	down
LOC_Os01g63210	3223.42	6354.52	92.3204	-6.10605	0	0	down
LOC_Os01g63230	1313.16	2346.32	280.007	-3.06747	0	0	down
LOC_Os01g63270	2940.65	5078.43	802.872	-2.6616	0	0	down
LOC_Os01g63990	819.767	1593.73	45.8021	-5.12912	0	0	down
LOC_Os01g64490	3653.5	1831.99	5475.02	1.57982	0	0	up
LOC_Os01g64660	15583.8	31152	15.5843	-10.9566	0	0	down
LOC_Os01g64700	4958.26	1838.66	8077.86	2.13528	0	0	up
LOC_Os01g64960	17185	34325.8	44.2227	-9.5973	0	0	down
LOC_Os01g65260	2351.76	4647.51	56.0107	-6.37313	0	0	down
LOC_Os01g65380	3273.33	1543.22	5003.45	1.69737	0	0	up
LOC_Os01g65670	1286.44	379.69	2193.18	2.53036	0	0	up
LOC_Os01g65690	2287.92	4469.49	106.346	-5.38881	0	0	down
LOC_Os01g66120	11179.6	17566.6	4792.49	-1.87401	0	0	down
LOC_Os01g66170	1244.65	2277.77	211.542	-3.42989	0	0	down
LOC_Os01g67000	3044.54	5506.98	582.112	-3.24396	0	0	down
LOC_Os01g67120	4985.88	9943.38	28.3756	-8.4548	0	0	down
LOC_Os01g67320	1192.6	2055.4	329.811	-2.63975	0	0	down
LOC_Os01g67720	2333.82	4296.09	371.545	-3.53247	0	0	down
LOC_Os01g67860	19581.8	8242.63	30921	1.9073	0	0	up
LOC_Os01g68300	3794.13	7384.63	203.617	-5.18518	0	0	down
LOC_Os01g68330	2243.53	3906.72	580.341	-2.75053	0	0	down
LOC_Os01g68720	3088.55	118.32	6058.77	5.67839	0	0	up
LOC_Os01g68730	3023.15	35.0696	6011.23	7.41794	0	0	up
LOC_Os01g68740	3136.92	323.894	5949.95	4.19853	0	0	up
LOC_Os01g68860	4011.4	7358.97	663.83	-3.47059	0	0	down
LOC_Os01g69030	4084.51	8103.56	65.4606	-6.9527	0	0	down
LOC_Os01g69060	1878.35	3655.82	100.876	-5.17034	0	0	down
LOC_Os01g69070	998.896	1834.87	162.927	-3.49651	0	0	down
LOC_Os01g69080	5149.77	9806.63	492.913	-4.31558	0	0	down
LOC_Os01g69950	4149.87	8154.06	145.669	-5.8099	0	0	down
LOC_Os01g70170	8343.48	4234.39	12452.6	1.55608	0	0	up
LOC_Os01g70210	2668.3	4173.38	1163.22	-1.84383	0	0	down
LOC_Os01g70400	3133.31	6252.11	14.5011	-8.75511	0	0	down
LOC_Os01g70820	771.664	1396.41	146.915	-3.24948	0	0	down
LOC_Os01g72130	948.334	130.254	1766.41	3.76386	0	0	up
LOC_Os01g72460	749.262	1436.77	61.7571	-4.54545	0	0	down
LOC_Os01g72570	1774.35	2984.32	564.378	-2.40355	0	0	down
LOC_Os01g72800	1364.87	2617.38	112.36	-4.54098	0	0	down
LOC_Os01g72834	2261.11	615.439	3906.77	2.66605	0	0	up
LOC_Os01g73450	1027.43	1875.35	179.516	-3.38361	0	0	down
LOC_Os01g73900	1195.79	2078.08	313.5	-2.72758	0	0	down
LOC_Os01g73910	2110.57	3881.14	340.005	-3.51264	0	0	down
LOC_Os01g73940	1620.62	2838.27	402.969	-2.82137	0	0	down
LOC_Os01g73960	4137.57	7477.7	797.448	-3.23106	0	0	down
LOC_Os01g74110	4080.45	82.0068	8078.89	6.6221	0	0	up
LOC_Os01g74190	1619.41	3031.61	207.221	-3.8779	0	0	down
LOC_Os01g74410	16770.6	1862.51	31678.8	4.08808	0	0	up
LOC_Os01g74650	10708.4	18066.8	3349.97	-2.43156	0	0	down
LOC_Os02g01010	4084.22	1584.18	6584.25	2.05528	0	0	up
LOC_Os02g01220	1357.5	62.1036	2652.9	5.41429	0	0	up
LOC_Os02g01590	6944.43	13306.4	582.463	-4.51195	0	0	down
LOC_Os02g01890	1222.83	112.329	2333.34	4.37563	0	0	up
LOC_Os02g02390	1376.63	2575.46	177.807	-3.8579	0	0	down
LOC_Os02g02520	1882.65	3598.72	166.576	-4.43425	0	0	down
LOC_Os02g03010	2094.82	3901.77	287.858	-3.76399	0	0	down
LOC_Os02g03050	723.689	1360.32	87.0534	-3.9647	0	0	down
LOC_Os02g03230	3913.68	6668.1	1159.25	-2.52418	0	0	down
LOC_Os02g03280	3277.95	1238.27	5317.62	2.10248	0	0	up
LOC_Os02g03330	3593.18	6512.83	673.533	-3.27218	0	0	down
LOC_Os02g03720	914.531	1788.69	40.3742	-5.46847	0	0	down
LOC_Os02g04170	2569.56	4921.02	218.09	-4.49986	0	0	down
LOC_Os02g04460	3265.36	6395.63	135.078	-5.56276	0	0	down
LOC_Os02g04510	2481.67	4944.67	18.6726	-8.04732	0	0	down
LOC_Os02g05630	8523.02	13112.9	3933.14	-1.73772	0	0	down
LOC_Os02g06300	2122.22	4138.61	105.828	-5.28577	0	0	down
LOC_Os02g06430	3744.92	5913.68	1576.15	-1.9079	0	0	down
LOC_Os02g07260	6088.33	2702.35	9474.3	1.80967	0	0	up
LOC_Os02g07410	4017.09	1506.17	6528.01	2.11577	0	0	up
LOC_Os02g07680	1495.18	2525.57	464.795	-2.44185	0	0	down
LOC_Os02g07930	1052.55	1819.83	285.266	-2.67582	0	0	down
LOC_Os02g08010	2402.36	868.233	3936.49	2.18067	0	0	up
LOC_Os02g08440	3190.89	6050.1	331.69	-4.18925	0	0	down
LOC_Os02g09150	4036.48	6978.4	1094.56	-2.6715	0	0	down
LOC_Os02g09220	1995.9	234.562	3757.24	4.00066	0	0	up
LOC_Os02g09340	955.068	1705.04	205.095	-3.0497	0	0	down
LOC_Os02g09490	7698.74	2859.76	12537.7	2.13203	0	0	up
LOC_Os02g09590	2016.75	3934.33	99.1642	-5.31379	0	0	down
LOC_Os02g09930	3727.78	751.929	6703.63	3.15597	0	0	up
LOC_Os02g09940	1564.25	3099.13	29.3658	-6.72741	0	0	down
LOC_Os02g10120	2043.78	4062.77	24.776	-7.34348	0	0	down
LOC_Os02g10350	4541.07	9033.68	48.4562	-7.54014	0	0	down
LOC_Os02g10860	1251.01	2341.66	160.356	-3.87231	0	0	down
LOC_Os02g11020	853.111	90.8434	1615.38	4.1529	0	0	up
LOC_Os02g11770	1172.38	2060.32	284.44	-2.85298	0	0	down
LOC_Os02g13060	1769.54	3227.53	311.556	-3.37634	0	0	down
LOC_Os02g13100	3620.29	1845.4	5395.19	1.54776	0	0	up
LOC_Os02g13170	2156.79	3988.46	325.109	-3.61424	0	0	down
LOC_Os02g13510	1875.5	3004.02	746.981	-2.00678	0	0	down
LOC_Os02g13970	2347.62	4618	77.2484	-5.90789	0	0	down
LOC_Os02g14770	12995.2	5840.85	20149.6	1.78656	0	0	up
LOC_Os02g15540	1649.25	2770.13	528.374	-2.39087	0	0	down
LOC_Os02g15660	4644.67	8958.45	330.897	-4.75732	0	0	down
LOC_Os02g15700	3287.57	56.1858	6518.96	6.86244	0	0	up
LOC_Os02g15750	3405.55	6770.88	40.2274	-7.38919	0	0	down
LOC_Os02g15810	2020.84	701.131	3340.54	2.25323	0	0	up
LOC_Os02g15900	2279.59	4398.82	160.353	-4.7799	0	0	down
LOC_Os02g17500	5739.99	9825.12	1654.85	-2.57007	0	0	down
LOC_Os02g17920	2556.29	5089.37	23.2069	-7.7765	0	0	down
LOC_Os02g17970	3610.99	6579.31	642.667	-3.35318	0	0	down
LOC_Os02g18450	9269.33	18376.9	161.748	-6.8244	0	0	down
LOC_Os02g20360	13722.8	3801.52	23644.2	2.63701	0	0	up
LOC_Os02g22260	1336	2529.55	142.458	-4.15152	0	0	down
LOC_Os02g26860	2642.01	4606.96	677.074	-2.76709	0	0	down
LOC_Os02g27060	2389.93	4158.35	621.505	-2.74279	0	0	down
LOC_Os02g27220	4128.4	6474.01	1782.8	-1.86084	0	0	down
LOC_Os02g29510	963.286	1810.6	115.966	-3.96351	0	0	down
LOC_Os02g29550	3946	6769.34	1122.65	-2.59308	0	0	down
LOC_Os02g30320	1580.68	2874.17	287.194	-3.32695	0	0	down
LOC_Os02g30630	4224.67	6553.18	1896.16	-1.7902	0	0	down
LOC_Os02g30650	1047.24	2041.92	52.5718	-5.28255	0	0	down
LOC_Os02g30810	5968.14	14.6775	11921.6	9.6687	0	0	up
LOC_Os02g31030	1116.03	118.807	2113.26	4.15451	0	0	up
LOC_Os02g32030	13398.7	7643.09	19154.4	1.32541	0	0	up
LOC_Os02g32250	2269.48	4076.78	462.174	-3.14092	0	0	down
LOC_Os02g32490	6387.04	2065.57	10708.5	2.3741	0	0	up
LOC_Os02g32520	3821.08	6934.25	707.913	-3.29209	0	0	down
LOC_Os02g32690	1873.72	390.91	3356.53	3.10389	0	0	up
LOC_Os02g32730	2337.57	3833.75	841.38	-2.18898	0	0	down
LOC_Os02g32814	6346.39	2888.22	9804.56	1.76267	0	0	up
LOC_Os02g33010	1441.09	2569.77	312.399	-3.04486	0	0	down
LOC_Os02g33450	8411.88	15849.3	974.432	-4.02381	0	0	down
LOC_Os02g33500	3295.74	6363.17	228.318	-4.8011	0	0	down
LOC_Os02g34650	882.206	155.881	1608.53	3.36685	0	0	up
LOC_Os02g34810	10186.5	20314.3	58.6812	-8.44	0	0	down
LOC_Os02g35090	1767.1	3506.02	28.1729	-6.96611	0	0	down
LOC_Os02g35490	1586	39.214	3132.78	6.32088	0	0	up
LOC_Os02g35620	956.35	1681.67	231.028	-2.86416	0	0	down
LOC_Os02g35900	1671.74	3261.02	82.4624	-5.30795	0	0	down
LOC_Os02g36140	3098.11	6080.51	115.708	-5.72163	0	0	down
LOC_Os02g36340	8873.87	15329.7	2418	-2.66422	0	0	down
LOC_Os02g36380	1808.65	3197.07	420.241	-2.92629	0	0	down
LOC_Os02g36414	1312.81	148.055	2477.57	4.06278	0	0	up
LOC_Os02g36570	6286.29	12489.1	83.4545	-7.2245	0	0	down
LOC_Os02g36924	816.051	82.9996	1549.1	4.22539	0	0	up
LOC_Os02g37250	65133.5	13.6247	130253	13.2307	0	0	up
LOC_Os02g37690	2703.76	5206.3	201.211	-4.69257	0	0	down
LOC_Os02g37800	1217.99	2258.13	177.845	-3.66836	0	0	down
LOC_Os02g37830	4620.5	6963.74	2277.26	-1.61322	0	0	down
LOC_Os02g37880	2461.11	4006.86	915.358	-2.13105	0	0	down
LOC_Os02g38020	6324.03	12579.9	68.1278	-7.52856	0	0	down
LOC_Os02g38210	8859.36	17281.8	436.897	-5.30886	0	0	down
LOC_Os02g38240	1138.21	2238.64	37.7833	-5.88148	0	0	down
LOC_Os02g38820	3795.68	7562.21	29.1482	-8.01477	0	0	down
LOC_Os02g38920	15715.5	4578.61	26852.4	2.55208	0	0	up
LOC_Os02g39040	1233.24	2221.5	244.99	-3.17907	0	0	down
LOC_Os02g39160	8101.47	13866.1	2336.8	-2.56913	0	0	down
LOC_Os02g39360	11964.5	23152.2	776.758	-4.89811	0	0	down
LOC_Os02g39530	1777.35	2901.28	653.425	-2.15147	0	0	down
LOC_Os02g39570	2893.58	4819.36	967.799	-2.31562	0	0	down
LOC_Os02g39600	1026	1809.47	242.531	-2.89719	0	0	down
LOC_Os02g39710	2178.97	4296.91	61.0257	-6.12737	0	0	down
LOC_Os02g39730	1631.06	3167.52	94.5956	-5.06444	0	0	down
LOC_Os02g40180	784.222	1477.5	90.946	-4.02464	0	0	down
LOC_Os02g40730	901.066	94.2911	1707.84	4.18103	0	0	up
LOC_Os02g41630	88361.3	55049.8	121673	1.14419	0	0	up
LOC_Os02g41860	8355.05	2945.5	13764.6	2.22406	0	0	up
LOC_Os02g42290	4711.67	8323.78	1099.55	-2.92026	0	0	down
LOC_Os02g42330	2612.9	4279.26	946.55	-2.17613	0	0	down
LOC_Os02g42960	1621.8	3213.26	30.333	-6.73562	0	0	down
LOC_Os02g43350	3170.35	5315.88	1024.82	-2.37492	0	0	down
LOC_Os02g43410	14727.3	88.9098	29365.7	8.36641	0	0	up
LOC_Os02g43500	1913.04	3014.09	811.984	-1.89208	0	0	down
LOC_Os02g43600	2578.11	5070.08	86.1429	-5.87777	0	0	down
LOC_Os02g43660	1956.28	222.049	3690.52	4.05397	0	0	up
LOC_Os02g44370	2719.39	4218.98	1219.8	-1.79025	0	0	down
LOC_Os02g45054	1951.81	3648.67	254.958	-3.83471	0	0	down
LOC_Os02g45170	1278.22	2217.81	338.626	-2.71319	0	0	down
LOC_Os02g45250	1759.96	2819.68	700.239	-2.01049	0	0	down
LOC_Os02g45320	1861.75	3361.82	361.688	-3.21791	0	0	down
LOC_Os02g45670	3066.35	5646.7	486.002	-3.53961	0	0	down
LOC_Os02g45930	1794.66	3028.82	560.495	-2.43016	0	0	down
LOC_Os02g46030	6685.04	12594.4	775.683	-4.0212	0	0	down
LOC_Os02g46260	2882.36	5530.74	233.978	-4.5632	0	0	down
LOC_Os02g46660	2945.62	4993.65	897.595	-2.47538	0	0	down
LOC_Os02g47020	34846.2	69630.4	61.9044	-10.1242	0	0	down
LOC_Os02g47120	2516.64	4089.57	943.72	-2.1142	0	0	down
LOC_Os02g47130	1257.45	275.9	2239	3.02148	0	0	up
LOC_Os02g47180	1796	399.788	3192.22	2.99675	0	0	up
LOC_Os02g47470	3320.16	5765.47	874.842	-2.72092	0	0	down
LOC_Os02g47560	1153.85	2110.91	196.782	-3.41787	0	0	down
LOC_Os02g47600	5916.69	10773.6	1059.74	-3.34572	0	0	down
LOC_Os02g47620	3680.43	7341.87	18.9956	-8.59463	0	0	down
LOC_Os02g47780	1464.75	158.755	2770.74	4.12706	0	0	up
LOC_Os02g47800	3830.84	6484.53	1177.15	-2.46073	0	0	down
LOC_Os02g48210	1431.57	345.604	2517.53	2.86462	0	0	up
LOC_Os02g48320	1521.74	201.097	2842.39	3.81951	0	0	up
LOC_Os02g48360	2116.98	651.63	3582.33	2.45871	0	0	up
LOC_Os02g48390	5093.3	1180.37	9006.23	2.93147	0	0	up
LOC_Os02g48560	10622.7	17333.1	3912.38	-2.14723	0	0	down
LOC_Os02g48690	1039.81	239.702	1839.93	2.9402	0	0	up
LOC_Os02g48720	18028	11180.4	24875.5	1.15363	0	0	up
LOC_Os02g48870	2427.5	954.928	3900.08	2.02997	0	0	up
LOC_Os02g49326	1662.75	3240.16	85.3306	-5.24241	0	0	down
LOC_Os02g49570	2040.34	3353.95	726.724	-2.2065	0	0	down
LOC_Os02g49700	15252.4	24574	5930.81	-2.05052	0	0	down
LOC_Os02g50240	19521.4	9974.12	29068.7	1.54324	0	0	up
LOC_Os02g50560	2212.29	4314.88	109.691	-5.30392	0	0	down
LOC_Os02g51070	1963.41	3475.28	451.543	-2.94537	0	0	down
LOC_Os02g51080	4051.14	8073.74	28.5412	-8.13924	0	0	down
LOC_Os02g51110	18518.7	303.801	36733.6	6.91579	0	0	up
LOC_Os02g51350	3074.86	4682.19	1467.54	-1.67264	0	0	down
LOC_Os02g51470	8399.29	16670.3	128.319	-7.02334	0	0	down
LOC_Os02g51790	2156.49	4165.19	147.797	-4.81253	0	0	down
LOC_Os02g52210	1289.72	2545.39	34.0587	-6.21124	0	0	down
LOC_Os02g52260	1595	3136.7	53.3011	-5.87727	0	0	down
LOC_Os02g52340	1635.33	2998.2	272.455	-3.45763	0	0	down
LOC_Os02g52390	3434.97	5589.74	1280.2	-2.12613	0	0	down
LOC_Os02g52420	1059.65	1873.43	245.87	-2.93041	0	0	down
LOC_Os02g52744	1189.3	2115.93	262.676	-3.00795	0	0	down
LOC_Os02g52930	1646.85	43.3879	3250.31	6.22093	0	0	up
LOC_Os02g52940	2893.18	4644.66	1141.7	-2.02382	0	0	down
LOC_Os02g53140	3903.21	6920.48	885.945	-2.96443	0	0	down
LOC_Os02g53180	814.49	1537.83	91.1521	-4.08211	0	0	down
LOC_Os02g53530	971.698	1911.21	32.1828	-5.87647	0	0	down
LOC_Os02g53620	991.431	116.269	1866.59	4.00295	0	0	up
LOC_Os02g53770	4263.03	7149.34	1376.73	-2.37557	0	0	down
LOC_Os02g54510	2950.82	5258.5	643.136	-3.03027	0	0	down
LOC_Os02g54980	1940.21	3803.49	76.9269	-5.61314	0	0	down
LOC_Os02g55120	3101.28	6042.98	159.58	-5.24363	0	0	down
LOC_Os02g55480	2693.36	4260.01	1126.72	-1.91939	0	0	down
LOC_Os02g55630	1749.53	3067.3	431.756	-2.83117	0	0	down
LOC_Os02g55890	5009.31	47.596	9971.03	7.7107	0	0	up
LOC_Os02g56310	1114.91	206.644	2023.18	3.29108	0	0	up
LOC_Os02g56510	5704.72	639.245	10770.2	4.07383	0	0	up
LOC_Os02g57040	3840.08	5890.57	1789.6	-1.71944	0	0	down
LOC_Os02g57060	2710.86	5153.72	268.004	-4.26764	0	0	down
LOC_Os02g57120	4896.95	9739.45	54.4495	-7.4872	0	0	down
LOC_Os02g57160	7863.87	15131.6	596.165	-4.66596	0	0	down
LOC_Os02g57290	1613.66	3144.56	82.7613	-5.25503	0	0	down
LOC_Os02g57410	5311.58	8591.06	2032.1	-2.07941	0	0	down
LOC_Os02g57670	1718.59	3402.32	34.8698	-6.62838	0	0	down
LOC_Os02g57720	8548.26	2722.58	14373.9	2.40048	0	0	up
LOC_Os02g58230	2805.59	4427.77	1183.41	-1.90318	0	0	down
LOC_Os02g58270	1178.14	2125.05	231.232	-3.20003	0	0	down
LOC_Os03g01300	2435.88	562.976	4308.79	2.93615	0	0	up
LOC_Os03g01530	1918.59	681.046	3156.13	2.21166	0	0	up
LOC_Os03g01830	1457.38	2616.56	298.197	-3.13451	0	0	down
LOC_Os03g02530	1714.88	335.742	3094.01	3.20284	0	0	up
LOC_Os03g02590	10389.2	20709.6	68.7728	-8.23499	0	0	down
LOC_Os03g02690	1042.39	2053.98	30.7897	-6.06149	0	0	down
LOC_Os03g02960	833.047	1568.28	97.8102	-4.00816	0	0	down
LOC_Os03g03020	1895.85	3743.86	47.8339	-6.29599	0	0	down
LOC_Os03g03260	1151.05	2115.94	186.166	-3.5112	0	0	down
LOC_Os03g03360	2666.93	5228.55	105.315	-5.6417	0	0	down
LOC_Os03g03470	840.687	1630.58	50.7982	-5.0156	0	0	down
LOC_Os03g03510	4487.74	7266.23	1709.24	-2.08764	0	0	down
LOC_Os03g04100	1698.2	2956.07	440.336	-2.74515	0	0	down
LOC_Os03g04110	1993.71	3182.22	805.194	-1.98354	0	0	down
LOC_Os03g04140	2032.76	3605.93	459.584	-2.96971	0	0	down
LOC_Os03g04410	6393.39	3077.04	9709.74	1.65797	0	0	up
LOC_Os03g04470	1871.46	3465.02	277.902	-3.63662	0	0	down
LOC_Os03g04660	756.201	1463.1	49.2988	-4.87958	0	0	down
LOC_Os03g04710	3150.04	5982.58	317.502	-4.23501	0	0	down
LOC_Os03g04770	5634.8	10868.6	400.96	-4.76138	0	0	down
LOC_Os03g05310	1221.19	2195.97	246.416	-3.15629	0	0	down
LOC_Os03g05800	1215.51	2331.97	99.0491	-4.56327	0	0	down
LOC_Os03g06139	1399.8	2767.69	31.9029	-6.43657	0	0	down
LOC_Os03g06520	2153.06	4003.15	302.973	-3.72189	0	0	down
LOC_Os03g06620	8637.43	3599.27	13675.6	1.92562	0	0	up
LOC_Os03g06720	1755.48	2993.21	517.744	-2.53131	0	0	down
LOC_Os03g07300	12993.3	25226.9	759.671	-5.05188	0	0	down
LOC_Os03g07360	3724.96	6663.18	786.736	-3.0826	0	0	down
LOC_Os03g07480	3417.07	6148.88	685.266	-3.16614	0	0	down
LOC_Os03g07880	1831.4	388.194	3274.61	3.07628	0	0	up
LOC_Os03g07960	2130.42	4235.76	25.0889	-7.42018	0	0	down
LOC_Os03g08070	3067.22	5309.81	824.623	-2.68598	0	0	down
LOC_Os03g08330	924.98	1638.47	211.494	-2.95314	0	0	down
LOC_Os03g08360	2744.13	5466.67	21.5971	-7.99636	0	0	down
LOC_Os03g08430	5305.83	8026.35	2585.31	-1.63432	0	0	down
LOC_Os03g08470	7573.73	424.96	14722.5	5.11402	0	0	up
LOC_Os03g08550	2780.66	1275.29	4286.02	1.74896	0	0	up
LOC_Os03g08570	2846.46	4690.91	1002.01	-2.22772	0	0	down
LOC_Os03g09020	2015	3938.5	91.4947	-5.42998	0	0	down
LOC_Os03g09060	833.914	1618.02	49.809	-5.03145	0	0	down
LOC_Os03g09220	2320.87	3663.76	977.989	-1.90562	0	0	down
LOC_Os03g09250	8933.43	14952.5	2914.34	-2.35939	0	0	down
LOC_Os03g09900	4938.29	1652.08	8224.49	2.3156	0	0	up
LOC_Os03g09980	1136.09	58.2212	2213.95	5.24808	0	0	up
LOC_Os03g10030	826.878	1584.83	68.9269	-4.52137	0	0	down
LOC_Os03g10060	1802.91	3414.85	190.966	-4.15938	0	0	down
LOC_Os03g10090	4519.21	8909.46	128.97	-6.11558	0	0	down
LOC_Os03g10180	4067.33	7679.41	455.256	-4.07612	0	0	down
LOC_Os03g10640	3898.95	1950.79	5847.12	1.58394	0	0	up
LOC_Os03g10880	2244.25	4377.77	110.732	-5.29938	0	0	down
LOC_Os03g11230	1143.94	2240.45	47.4322	-5.56466	0	0	down
LOC_Os03g11590	3236.83	1193.12	5280.54	2.1456	0	0	up
LOC_Os03g11734	2235.93	286.538	4185.32	3.86682	0	0	up
LOC_Os03g12000	1218.28	2119.67	316.884	-2.74264	0	0	down
LOC_Os03g12020	1936.56	3808.69	64.4404	-5.88369	0	0	down
LOC_Os03g12290	15675.9	1783.29	29568.5	4.05146	0	0	up
LOC_Os03g12840	2014.79	3463.65	565.94	-2.61534	0	0	down
LOC_Os03g12890	1763.4	3393.91	132.892	-4.67418	0	0	down
LOC_Os03g13390	4508.96	1209.33	7808.6	2.69013	0	0	up
LOC_Os03g14450	7762.32	1752.9	13771.7	2.97425	0	0	up
LOC_Os03g14590	3803.16	5964.87	1641.45	-1.86154	0	0	down
LOC_Os03g14690	2175.93	3604.92	746.945	-2.2723	0	0	down
LOC_Os03g14730	1145.24	2042.1	248.372	-3.04189	0	0	down
LOC_Os03g15530	1882.46	3252.68	512.242	-2.66446	0	0	down
LOC_Os03g15870	1594.91	3156.65	33.1763	-6.57276	0	0	down
LOC_Os03g16230	1233.89	2352.56	115.219	-4.35562	0	0	down
LOC_Os03g16334	2601.64	5032.31	170.966	-4.87764	0	0	down
LOC_Os03g16430	1103.67	2179.68	27.6731	-6.29648	0	0	down
LOC_Os03g16700	8364.98	13081.9	3648.02	-1.84252	0	0	down
LOC_Os03g17070	10562.1	21079.4	44.7891	-8.87441	0	0	down
LOC_Os03g17350	1308.29	341.401	2275.18	2.73613	0	0	up
LOC_Os03g17580	1488.44	2898.44	78.4527	-5.2135	0	0	down
LOC_Os03g17600	940.909	1839.17	42.6512	-5.42582	0	0	down
LOC_Os03g17690	5079.5	1760.23	8398.77	2.25408	0	0	up
LOC_Os03g17870	11981.5	1446.26	22516.8	3.96033	0	0	up
LOC_Os03g18070	10358.4	20012	704.869	-4.82583	0	0	down
LOC_Os03g18200	4155.58	8136.63	174.533	-5.54906	0	0	down
LOC_Os03g18770	3279.9	881.882	5677.91	2.68656	0	0	up
LOC_Os03g18850	4180.04	167.51	8192.58	5.61335	0	0	up
LOC_Os03g19420	27032.7	3082.01	50983.4	4.04788	0	0	up
LOC_Os03g19427	17472.1	3044.74	31899.4	3.38889	0	0	up
LOC_Os03g19560	4405.25	8719.48	91.0205	-6.58151	0	0	down
LOC_Os03g19650	1296.22	2426.08	166.364	-3.86432	0	0	down
LOC_Os03g19760	5697.82	10969.3	426.296	-4.68778	0	0	down
LOC_Os03g20100	4528.98	8947.88	110.084	-6.34544	0	0	down
LOC_Os03g20380	6680.91	13001.7	360.1	-5.17102	0	0	down
LOC_Os03g20420	5239.93	572.95	9906.91	4.11239	0	0	up
LOC_Os03g20700	7278.16	14509.9	46.4189	-8.2969	0	0	down
LOC_Os03g21040	4504.51	1047.02	7961.99	2.92671	0	0	up
LOC_Os03g21370	2135.45	4187.61	83.2828	-5.65319	0	0	down
LOC_Os03g21890	4106.9	7368.2	845.588	-3.12446	0	0	down
LOC_Os03g21900	2057.67	3376.28	739.059	-2.19246	0	0	down
LOC_Os03g22120	1007.06	1800.92	213.192	-3.08027	0	0	down
LOC_Os03g22160	4428.93	7675.05	1182.8	-2.69832	0	0	down
LOC_Os03g22430	1717.47	2807.03	627.916	-2.16038	0	0	down
LOC_Os03g22670	806.143	1521.29	90.9984	-4.06261	0	0	down
LOC_Os03g22790	2320.18	4283.13	357.24	-3.58371	0	0	down
LOC_Os03g24020	1913.62	3754.75	72.4974	-5.6974	0	0	down
LOC_Os03g24860	1738.98	3366.38	111.577	-4.90523	0	0	down
LOC_Os03g25150	3169	1269.89	5068.1	1.99594	0	0	up
LOC_Os03g25330	4464.08	161.604	8766.55	5.76249	0	0	up
LOC_Os03g27019	1294.39	2306.28	282.494	-3.02597	0	0	down
LOC_Os03g27040	737.735	1426.49	48.9776	-4.85172	0	0	down
LOC_Os03g28140	1423.47	2438.19	408.754	-2.57437	0	0	down
LOC_Os03g28160	2179.97	4320.39	39.5556	-6.77339	0	0	down
LOC_Os03g28330	26708.8	14276	39141.6	1.45513	0	0	up
LOC_Os03g28940	2656.4	4139.18	1173.63	-1.81979	0	0	down
LOC_Os03g29240	2928.61	1282	4575.22	1.83535	0	0	up
LOC_Os03g31026	4103.21	6656.17	1550.24	-2.10181	0	0	down
LOC_Os03g31170	2975.18	4517.58	1432.78	-1.65562	0	0	down
LOC_Os03g31490	2297.81	3658.81	936.807	-1.96657	0	0	down
LOC_Os03g31839	3695.74	6048.81	1342.66	-2.17186	0	0	down
LOC_Os03g32490	10767.9	19775.5	1760.34	-3.4886	0	0	down
LOC_Os03g34040	3391.88	6684.72	99.0363	-6.07099	0	0	down
LOC_Os03g34310	981.508	1743.87	219.145	-2.99352	0	0	down
LOC_Os03g36540	2255.28	4430.72	79.8377	-5.79839	0	0	down
LOC_Os03g36750	5028.85	9957.66	100.029	-6.63642	0	0	down
LOC_Os03g37840	1038.16	2030.56	45.7487	-5.45239	0	0	down
LOC_Os03g38230	1059.88	2074.98	44.7897	-5.548	0	0	down
LOC_Os03g38730	3673.31	6789.65	556.97	-3.60686	0	0	down
LOC_Os03g40100	2678.24	4323.8	1032.69	-2.0667	0	0	down
LOC_Os03g40180	3584.5	1799.65	5369.36	1.57733	0	0	up
LOC_Os03g41080	6878.15	12299.3	1457.03	-3.07759	0	0	down
LOC_Os03g43410	1361.32	136.919	2585.72	4.23882	0	0	up
LOC_Os03g43720	2980.85	4706.54	1255.16	-1.90479	0	0	down
LOC_Os03g45400	1141.02	1998.11	283.934	-2.81951	0	0	down
LOC_Os03g45870	938.525	1686.61	190.444	-3.14288	0	0	down
LOC_Os03g46454	1660.07	183.85	3136.29	4.09296	0	0	up
LOC_Os03g46470	4405.78	21.573	8789.99	8.66853	0	0	up
LOC_Os03g47034	922.142	66.7103	1777.57	4.73722	0	0	up
LOC_Os03g48000	3214.65	6065.86	363.45	-4.06379	0	0	down
LOC_Os03g48300	3186.8	5902.51	471.088	-3.64993	0	0	down
LOC_Os03g48540	1743.37	340.173	3146.56	3.20945	0	0	up
LOC_Os03g49220	944.368	1687.25	201.489	-3.06911	0	0	down
LOC_Os03g49260	1824.17	54.6813	3593.66	6.04152	0	0	up
LOC_Os03g49630	7600.61	15024.1	177.158	-6.40312	0	0	down
LOC_Os03g49710	1964.53	3825.09	103.962	-5.19717	0	0	down
LOC_Os03g49720	1405.41	2784.67	26.1463	-6.76256	0	0	down
LOC_Os03g50070	2927.53	4749.76	1105.31	-2.10328	0	0	down
LOC_Os03g50130	3547.2	608.563	6485.84	3.41196	0	0	up
LOC_Os03g50270	1499.52	2938.41	60.6368	-5.60632	0	0	down
LOC_Os03g50885	8865.88	4964.44	12767.3	1.36266	0	0	up
LOC_Os03g51080	6868.62	1675.77	12061.5	2.84787	0	0	up
LOC_Os03g51930	1065.63	2014.15	117.11	-4.10265	0	0	down
LOC_Os03g51950	1823.05	3166.14	479.97	-2.72275	0	0	down
LOC_Os03g51960	1276.46	2364.13	188.781	-3.64178	0	0	down
LOC_Os03g52010	1694.21	3322.21	66.2093	-5.64673	0	0	down
LOC_Os03g52170	5762.79	10381.7	1143.85	-3.18204	0	0	down
LOC_Os03g52840	39823.9	68353	11294.8	-2.59733	0	0	down
LOC_Os03g53150	3386.39	959.561	5813.22	2.59876	0	0	up
LOC_Os03g53230	10811.3	3191.43	18431.2	2.52949	0	0	up
LOC_Os03g53300	1530.68	2864.61	196.747	-3.86332	0	0	down
LOC_Os03g53650	3481.24	1678.06	5284.43	1.65454	0	0	up
LOC_Os03g54100	1524.74	2517.65	531.829	-2.24359	0	0	down
LOC_Os03g55100	817.8	1557.13	78.4695	-4.31671	0	0	down
LOC_Os03g55240	1167.05	2107.06	227.04	-3.21838	0	0	down
LOC_Os03g55410	2444.11	122.986	4765.23	5.27536	0	0	up
LOC_Os03g55820	2034.95	3778.54	291.346	-3.69971	0	0	down
LOC_Os03g55930	1421.85	2785.01	58.6821	-5.57298	0	0	down
LOC_Os03g55970	1946.52	3320.77	572.264	-2.53538	0	0	down
LOC_Os03g56280	21160.4	41076	1244.75	-5.04575	0	0	down
LOC_Os03g56310	2247.41	3850.63	644.182	-2.58109	0	0	down
LOC_Os03g56470	1237.29	2298.35	176.221	-3.70249	0	0	down
LOC_Os03g56869	937.343	1756.65	118.039	-3.89389	0	0	down
LOC_Os03g57070	1202.41	2113.88	290.938	-2.86423	0	0	down
LOC_Os03g57240	833.787	1589.15	78.4212	-4.33681	0	0	down
LOC_Os03g57840	1139.97	2007.02	272.921	-2.87546	0	0	down
LOC_Os03g58040	3549.81	1381.98	5717.64	2.04764	0	0	up
LOC_Os03g58080	1097.96	1965.89	230.019	-3.10085	0	0	down
LOC_Os03g58230	4381.8	7657.2	1106.39	-2.7897	0	0	down
LOC_Os03g58580	1642.41	3115.25	169.576	-4.20051	0	0	down
LOC_Os03g59180	1514.49	2888.29	140.684	-4.35625	0	0	down
LOC_Os03g59320	4761.99	9507.73	16.2391	-9.18998	0	0	down
LOC_Os03g59640	2556.07	4940.14	171.989	-4.84524	0	0	down
LOC_Os03g60080	3515.58	6780.24	250.909	-4.75529	0	0	down
LOC_Os03g60100	1912.3	3779.81	44.7811	-6.39505	0	0	down
LOC_Os03g60340	2375.35	3935.1	815.59	-2.26945	0	0	down
LOC_Os03g61090	1955.02	3880.74	29.3065	-7.05181	0	0	down
LOC_Os03g61220	6112.97	11902.6	323.38	-5.20047	0	0	down
LOC_Os03g61260	2379.74	4607.97	151.519	-4.92804	0	0	down
LOC_Os03g61890	4034.17	7452.07	616.256	-3.59511	0	0	down
LOC_Os03g62240	2021.39	3786.46	256.312	-3.88647	0	0	down
LOC_Os03g62510	1672.2	3282.42	61.9874	-5.72404	0	0	down
LOC_Os03g62610	2157.59	3962.87	352.311	-3.49302	0	0	down
LOC_Os03g62630	2333.29	4620.56	46.0163	-6.65549	0	0	down
LOC_Os03g63360	853.538	1630.51	76.5702	-4.40275	0	0	down
LOC_Os03g63370	1035.48	1843.86	227.104	-3.01772	0	0	down
LOC_Os03g63480	4984.2	9753.1	215.306	-5.50171	0	0	down
LOC_Os03g63950	2062.94	4066.95	58.9249	-6.09849	0	0	down
LOC_Os03g64020	1437.86	2767.15	108.562	-4.67201	0	0	down
LOC_Os03g64070	2334.69	4029	640.379	-2.65394	0	0	down
LOC_Os03g64350	1163.21	2166.93	159.505	-3.7664	0	0	down
LOC_Os04g01540	1662.31	3150.73	173.878	-4.17499	0	0	down
LOC_Os04g02050	3390.65	6535.14	246.152	-4.72847	0	0	down
LOC_Os04g02910	3594.22	6548.61	639.823	-3.3538	0	0	down
LOC_Os04g05050	1414.41	2418.9	409.925	-2.5616	0	0	down
LOC_Os04g12010	1135.78	191.235	2080.33	3.44178	0	0	up
LOC_Os04g17100	10257.9	18321.7	2194.05	-3.06113	0	0	down
LOC_Os04g23040	1352.61	2597.77	107.443	-4.59352	0	0	down
LOC_Os04g23890	5794.29	11395.7	192.847	-5.88612	0	0	down
LOC_Os04g25400	6901.15	11268	2534.33	-2.1529	0	0	down
LOC_Os04g25570	930.909	1677.08	184.736	-3.18543	0	0	down
LOC_Os04g26920	8011.29	15792.1	230.436	-6.10079	0	0	down
LOC_Os04g27250	1591.21	2802.68	379.748	-2.88255	0	0	down
LOC_Os04g28990	1094.18	267.389	1920.97	2.84364	0	0	up
LOC_Os04g31120	2547.15	4414.14	680.171	-2.69736	0	0	down
LOC_Os04g31290	1115.16	287.295	1943.02	2.75829	0	0	up
LOC_Os04g32560	11835.5	17504.2	6166.7	-1.50528	0	0	down
LOC_Os04g32850	3670.12	7298.8	41.4537	-7.46518	0	0	down
LOC_Os04g32920	11391	2440.11	20341.9	3.05915	0	0	up
LOC_Os04g32950	10419.1	6122.96	14715.2	1.26495	0	0	up
LOC_Os04g33060	1365.61	2456.73	274.494	-3.16015	0	0	down
LOC_Os04g33190	5736.36	9249.77	2222.95	-2.05682	0	0	down
LOC_Os04g33210	1488.72	2565.19	412.245	-2.63633	0	0	down
LOC_Os04g33490	1095.02	1926.53	263.523	-2.86649	0	0	down
LOC_Os04g33740	922.461	177.858	1667.06	3.23008	0	0	up
LOC_Os04g34170	2751.48	625.753	4877.2	2.96219	0	0	up
LOC_Os04g34460	2672.95	5325.3	20.6087	-8.02082	0	0	down
LOC_Os04g35060	2687.28	4351.48	1023.08	-2.08816	0	0	down
LOC_Os04g35570	4392.59	7962.62	822.552	-3.27501	0	0	down
LOC_Os04g36062	1658.47	3098.67	218.264	-3.82736	0	0	down
LOC_Os04g36720	4923.99	9802.37	45.6141	-7.73215	0	0	down
LOC_Os04g36740	1748.07	49.3844	3446.75	6.12376	0	0	up
LOC_Os04g36760	2771.69	5375.39	167.996	-5.00052	0	0	down
LOC_Os04g37580	2267.05	4161.12	372.98	-3.4814	0	0	down
LOC_Os04g37710	3338.45	5388.21	1288.68	-2.06404	0	0	down
LOC_Os04g37770	1926.55	434.894	3418.21	2.97569	0	0	up
LOC_Os04g37920	2637.23	4866.51	407.952	-3.57435	0	0	down
LOC_Os04g37980	1038.18	110.58	1965.78	4.14812	0	0	up
LOC_Os04g37990	2241.52	221.136	4261.9	4.26632	0	0	up
LOC_Os04g38220	1568.15	2843.9	292.411	-3.27771	0	0	down
LOC_Os04g38750	1818.43	3505.18	131.673	-4.7338	0	0	down
LOC_Os04g39060	1055.03	1952.61	157.437	-3.63294	0	0	down
LOC_Os04g39190	1552.84	2684.41	421.269	-2.67151	0	0	down
LOC_Os04g39270	1350.63	2274.83	426.419	-2.41753	0	0	down
LOC_Os04g39320	4909.86	651.36	9168.35	3.81432	0	0	up
LOC_Os04g39840	1117.93	1922.06	313.789	-2.61553	0	0	down
LOC_Os04g40040	7051.2	3797.88	10304.5	1.44016	0	0	up
LOC_Os04g40950	12033.2	5208.38	18858.1	1.85624	0	0	up
LOC_Os04g41150	1426.39	2497.3	355.477	-2.81158	0	0	down
LOC_Os04g41340	12541.7	25055.8	27.5582	-9.80404	0	0	down
LOC_Os04g41460	4557.89	6970.98	2144.79	-1.70055	0	0	down
LOC_Os04g41560	2449	4725.5	172.508	-4.77626	0	0	down
LOC_Os04g41570	2182.82	4014.54	351.095	-3.51138	0	0	down
LOC_Os04g41960	1622.94	3085.66	160.214	-4.26869	0	0	down
LOC_Os04g41970	2261.48	138.76	4384.2	4.97788	0	0	up
LOC_Os04g42020	3443.84	6825.09	62.5932	-6.77933	0	0	down
LOC_Os04g42420	6125.83	10908	1343.61	-3.02071	0	0	down
LOC_Os04g42610	918.904	1633.8	204.011	-3.00275	0	0	down
LOC_Os04g43650	2712.34	5367.03	57.6533	-6.52807	0	0	down
LOC_Os04g43760	8131.87	4423.37	11840.4	1.4204	0	0	up
LOC_Os04g43800	1058.37	1970.64	146.106	-3.75981	0	0	down
LOC_Os04g45090	837.266	1580.53	94.0046	-4.06709	0	0	down
LOC_Os04g45490	7636.31	15179.8	92.8174	-7.36166	0	0	down
LOC_Os04g45810	2006.86	3998.72	14.9984	-8.05161	0	0	down
LOC_Os04g45860	1419.19	219.479	2618.91	3.57528	0	0	up
LOC_Os04g45900	3586.62	936.564	6236.68	2.73454	0	0	up
LOC_Os04g46010	1338.72	2630.92	46.5234	-5.82404	0	0	down
LOC_Os04g46390	17400.2	27193.3	7607.14	-1.83807	0	0	down
LOC_Os04g46610	1190.76	2360.72	20.7946	-6.82626	0	0	down
LOC_Os04g46750	1770.61	547.867	2993.35	2.45042	0	0	up
LOC_Os04g46940	2367.54	732.736	4002.34	2.44919	0	0	up
LOC_Os04g47360	930.147	75.9789	1784.31	4.55687	0	0	up
LOC_Os04g47860	3910.4	6256.48	1564.33	-1.9994	0	0	down
LOC_Os04g48790	2267.18	925.122	3609.24	1.96308	0	0	up
LOC_Os04g48880	2490.25	4901.41	79.0866	-5.9503	0	0	down
LOC_Os04g49350	4487.35	8877.71	96.9896	-6.50699	0	0	down
LOC_Os04g49450	6634.06	11278	1990.13	-2.50181	0	0	down
LOC_Os04g49570	2159.68	4178.69	140.672	-4.88891	0	0	down
LOC_Os04g50110	1336.61	2630.77	42.4547	-5.95163	0	0	down
LOC_Os04g50204	4009.07	5962.07	2056.08	-1.53604	0	0	down
LOC_Os04g51400	4025.8	6206.02	1845.58	-1.74994	0	0	down
LOC_Os04g51560	4086.77	1302.42	6871.13	2.39958	0	0	up
LOC_Os04g51792	1142	2194.81	89.1974	-4.62438	0	0	down
LOC_Os04g52130	3357.81	5780.02	935.601	-2.62795	0	0	down
LOC_Os04g52140	1127.32	195.016	2059.63	3.40175	0	0	up
LOC_Os04g52230	788.489	1483.65	93.3254	-3.99669	0	0	down
LOC_Os04g52260	1722.33	3425.58	19.0743	-7.49469	0	0	down
LOC_Os04g53230	13309.8	23618.9	3000.68	-2.9766	0	0	down
LOC_Os04g53310	1675.29	3087.18	263.395	-3.55158	0	0	down
LOC_Os04g53620	27398.7	16425.6	38371.8	1.22405	0	0	up
LOC_Os04g53640	920.706	79.0071	1762.4	4.47812	0	0	up
LOC_Os04g54190	1019.35	230.762	1807.93	2.972	0	0	up
LOC_Os04g54474	3378.75	1533.18	5224.32	1.76851	0	0	up
LOC_Os04g54630	1152.28	2281.54	23.013	-6.63768	0	0	down
LOC_Os04g55180	1245.21	2444.17	46.2466	-5.71849	0	0	down
LOC_Os04g55230	10943	20920.9	965.032	-4.43713	0	0	down
LOC_Os04g55410	3799.82	1198.82	6400.82	2.41568	0	0	up
LOC_Os04g55710	8273.85	14682.2	1865.46	-2.97563	0	0	down
LOC_Os04g55800	881.515	1731.28	31.7532	-5.78575	0	0	down
LOC_Os04g55850	3288.12	985.332	5590.9	2.50421	0	0	up
LOC_Os04g56160	51453.7	32092.8	70814.6	1.14179	0	0	up
LOC_Os04g56320	1624.22	3228.27	20.1672	-7.32019	0	0	down
LOC_Os04g56400	32269.8	64229.5	310.062	-7.69278	0	0	down
LOC_Os04g56710	4052.82	7482.81	622.833	-3.58667	0	0	down
LOC_Os04g57210	2488.12	4099.09	877.14	-2.22512	0	0	down
LOC_Os04g57300	4893.03	7413.8	2372.26	-1.64419	0	0	down
LOC_Os04g57400	4647.33	2044.3	7250.36	1.82675	0	0	up
LOC_Os04g57440	5509.87	1968.83	9050.92	2.20085	0	0	up
LOC_Os04g57560	7401.7	2992.74	11810.7	1.98056	0	0	up
LOC_Os04g57870	4192.59	1926.72	6458.45	1.74513	0	0	up
LOC_Os04g58410	881.113	1576.63	185.596	-3.08266	0	0	down
LOC_Os04g58730	4654.6	9087.16	222.039	-5.3591	0	0	down
LOC_Os04g58780	1343.53	2543.04	144.011	-4.14875	0	0	down
LOC_Os04g59040	2934.66	1348.76	4520.56	1.74515	0	0	up
LOC_Os04g59150	3733.03	506.621	6959.43	3.78019	0	0	up
LOC_Os04g59494	4388.96	6615.86	2162.05	-1.61272	0	0	down
LOC_Os04g59610	2102.17	3985	219.345	-4.18273	0	0	down
LOC_Os05g01110	2493.47	4829.29	157.651	-4.93445	0	0	down
LOC_Os05g01270	4623.16	8128.37	1117.95	-2.86255	0	0	down
LOC_Os05g01280	1748.22	2891.84	604.597	-2.25852	0	0	down
LOC_Os05g01290	1972.82	3214.45	731.2	-2.13598	0	0	down
LOC_Os05g01750	1185.57	2053.58	317.553	-2.69614	0	0	down
LOC_Os05g01950	3006.36	5989.99	22.7396	-8.04922	0	0	down
LOC_Os05g01970	1038.12	1973.71	102.522	-4.26695	0	0	down
LOC_Os05g02220	4664.41	7215.04	2113.78	-1.77181	0	0	down
LOC_Os05g02420	47014.8	8343.04	85686.6	3.36026	0	0	up
LOC_Os05g03610	1739.31	540.422	2938.19	2.44264	0	0	up
LOC_Os05g03960	722.175	1393.05	51.2993	-4.76423	0	0	down
LOC_Os05g04170	2330.06	4423.74	236.385	-4.22179	0	0	down
LOC_Os05g04500	2372.46	3796.21	948.722	-2.00007	0	0	down
LOC_Os05g04510	76407.9	29642.4	123173	2.05493	0	0	up
LOC_Os05g04610	1969.28	3433.84	504.712	-2.76739	0	0	down
LOC_Os05g04620	5432.81	9405.15	1460.47	-2.68604	0	0	down
LOC_Os05g05160	6230.65	9317.83	3143.46	-1.5675	0	0	down
LOC_Os05g05600	3402.09	6687.39	116.783	-5.84405	0	0	down
LOC_Os05g05680	1877.75	3393.63	361.871	-3.23032	0	0	down
LOC_Os05g06890	1957.46	3564.12	350.796	-3.34938	0	0	down
LOC_Os05g06970	3133.35	18.9805	6247.72	8.35789	0	0	up
LOC_Os05g07130	5853.23	11157.2	549.258	-4.34183	0	0	down
LOC_Os05g07280	1161.63	62.1246	2261.13	5.18268	0	0	up
LOC_Os05g07740	896.135	165.836	1626.43	3.29343	0	0	up
LOC_Os05g07870	1753.34	3336.98	169.701	-4.29932	0	0	down
LOC_Os05g09400	1187.36	2287.26	87.4522	-4.71786	0	0	down
LOC_Os05g11064	861.311	1581.21	141.414	-3.48783	0	0	down
LOC_Os05g11090	1160.42	2102.95	217.884	-3.27047	0	0	down
LOC_Os05g11260	5345.93	10124.3	567.527	-4.15669	0	0	down
LOC_Os05g12450	789.912	1475.11	104.714	-3.81741	0	0	down
LOC_Os05g12474	1444.73	2406.39	483.064	-2.31602	0	0	down
LOC_Os05g13900	1735.91	290.487	3181.34	3.45323	0	0	up
LOC_Os05g13940	10546	18581.1	2510.91	-2.88806	0	0	down
LOC_Os05g14180	11098	15815.6	6380.46	-1.30991	0	0	down
LOC_Os05g15160	1109.26	2142.31	76.2032	-4.8221	0	0	down
LOC_Os05g15360	1667.57	2974.54	360.6	-3.04453	0	0	down
LOC_Os05g15630	1061.32	219.893	1902.75	3.11417	0	0	up
LOC_Os05g15770	1784.08	2979.96	588.194	-2.34149	0	0	down
LOC_Os05g16740	1862.94	362.469	3363.42	3.21608	0	0	up
LOC_Os05g16930	1836.82	37.2889	3636.35	6.60549	0	0	up
LOC_Os05g19910	2399.05	70.0993	4727.99	6.07159	0	0	up
LOC_Os05g20100	1003.96	104.228	1903.7	4.18978	0	0	up
LOC_Os05g22614	4047.41	8077.41	17.4159	-8.87637	0	0	down
LOC_Os05g22730	2020.98	4021.91	20.0496	-7.63778	0	0	down
LOC_Os05g22930	743.641	1366.12	121.162	-3.49177	0	0	down
LOC_Os05g23740	4329.36	7279.34	1379.38	-2.39975	0	0	down
LOC_Os05g23880	2787.27	4741.15	833.392	-2.5064	0	0	down
LOC_Os05g25310	5928.5	2905.45	8951.54	1.6235	0	0	up
LOC_Os05g25400	703.835	1342.91	64.7625	-4.37282	0	0	down
LOC_Os05g25840	3763.07	6450.54	1075.59	-2.58481	0	0	down
LOC_Os05g26820	2184.64	3528.5	840.778	-2.06974	0	0	down
LOC_Os05g27100	1796.02	3560.25	31.7844	-6.79994	0	0	down
LOC_Os05g28200	2245.55	3928.58	562.516	-2.80658	0	0	down
LOC_Os05g28500	2444.02	4503.92	384.123	-3.54934	0	0	down
LOC_Os05g29760	5348.98	10261.1	436.825	-4.5583	0	0	down
LOC_Os05g29790	1013.5	101.963	1925.05	4.23603	0	0	up
LOC_Os05g30220	989.558	1849.61	129.502	-3.84308	0	0	down
LOC_Os05g30350	3902.03	7275.59	528.463	-3.78368	0	0	down
LOC_Os05g31140	10640.2	6146.69	15133.8	1.29986	0	0	up
LOC_Os05g31680	2260.39	4339.64	181.133	-4.58794	0	0	down
LOC_Os05g32140	1333.56	2306.62	360.496	-2.67401	0	0	down
LOC_Os05g32220	4993.21	9136.81	849.603	-3.42587	0	0	down
LOC_Os05g32390	2482.49	4457.7	507.277	-3.13209	0	0	down
LOC_Os05g32970	2888.18	5140.36	636.002	-3.01712	0	0	down
LOC_Os05g33290	3058.17	6013.36	102.97	-5.85857	0	0	down
LOC_Os05g33380	5732.03	2327.84	9136.22	1.97249	0	0	up
LOC_Os05g33510	2392.49	4573.77	211.204	-4.43769	0	0	down
LOC_Os05g33520	1683.93	3324.49	43.3741	-6.25901	0	0	down
LOC_Os05g33570	4145.87	6404.62	1887.11	-1.76269	0	0	down
LOC_Os05g33620	4585.16	8886.4	283.929	-4.9689	0	0	down
LOC_Os05g33630	1452.44	2711.34	193.54	-3.80839	0	0	down
LOC_Os05g33840	1876.17	3584.12	168.218	-4.41538	0	0	down
LOC_Os05g34630	1527.38	3020.71	34.0481	-6.45844	0	0	down
LOC_Os05g34650	4589.93	7005.5	2174.36	-1.68773	0	0	down
LOC_Os05g35460	4305.31	1570.38	7040.24	2.16509	0	0	up
LOC_Os05g35540	1055.41	2047.18	63.6464	-5.01447	0	0	down
LOC_Os05g36994	1173.45	2150.64	196.257	-3.45385	0	0	down
LOC_Os05g37970	1176.92	281.413	2072.42	2.8814	0	0	up
LOC_Os05g39230	1156.56	2056.38	256.741	-3.00329	0	0	down
LOC_Os05g39990	1150.7	2030.18	271.223	-2.90804	0	0	down
LOC_Os05g40180	2036.45	4039.54	33.3578	-6.91581	0	0	down
LOC_Os05g40260	833.322	1522.62	144.024	-3.39929	0	0	down
LOC_Os05g40420	4203.12	2026.03	6380.21	1.65503	0	0	up
LOC_Os05g40770	1969.53	699.135	3239.92	2.2126	0	0	up
LOC_Os05g41640	27481.3	54534.8	427.704	-6.99335	0	0	down
LOC_Os05g41990	4232.69	720.829	7744.55	3.42504	0	0	up
LOC_Os05g42060	998.512	1958.72	38.3095	-5.68761	0	0	down
LOC_Os05g42190	1730.79	227.712	3233.86	3.82596	0	0	up
LOC_Os05g43170	1718.44	2905.31	531.578	-2.45171	0	0	down
LOC_Os05g43650	1540.28	2891.44	189.13	-3.93127	0	0	down
LOC_Os05g44020	1169.22	2145.68	192.771	-3.48049	0	0	down
LOC_Os05g45030	1843	3647.68	38.3247	-6.57395	0	0	down
LOC_Os05g45350	1716.55	3271.47	161.624	-4.34814	0	0	down
LOC_Os05g45400	5118.7	9117.11	1120.29	-3.02454	0	0	down
LOC_Os05g46580	2172.46	645.086	3699.84	2.52061	0	0	up
LOC_Os05g47560	5300.28	10263.2	337.408	-4.92998	0	0	down
LOC_Os05g47700	5622.14	254.504	10989.8	5.4306	0	0	up
LOC_Os05g47780	4505.5	7243.63	1767.36	-2.03498	0	0	down
LOC_Os05g48040	1431.38	363.8	2498.95	2.77998	0	0	up
LOC_Os05g48390	10388.3	5466.43	15310.2	1.48578	0	0	up
LOC_Os05g48630	7225.06	14439.2	10.9357	-10.3776	0	0	down
LOC_Os05g48660	1929.08	580.509	3277.65	2.49702	0	0	up
LOC_Os05g48760	3180.86	5160.49	1201.23	-2.10413	0	0	down
LOC_Os05g48870	3627.33	6403.76	850.904	-2.91055	0	0	down
LOC_Os05g48890	1314.29	194.993	2433.6	3.64297	0	0	up
LOC_Os05g49060	1424.33	2784.3	64.368	-5.4256	0	0	down
LOC_Os05g49200	21281.9	10721.5	31842.3	1.57049	0	0	up
LOC_Os05g49290	4226.45	1410.55	7042.34	2.31962	0	0	up
LOC_Os05g49380	2095.82	3961.13	230.504	-4.10388	0	0	down
LOC_Os05g49590	3454.11	5416.05	1492.18	-1.85881	0	0	down
LOC_Os05g49650	1068.24	2059.92	76.5681	-4.74974	0	0	down
LOC_Os05g49970	6754.46	12875.4	633.487	-4.34577	0	0	down
LOC_Os05g50380	1006.08	1810.78	201.375	-3.17337	0	0	down
LOC_Os05g50550	4896.26	9413.27	379.244	-4.63164	0	0	down
LOC_Os05g50840	3654.31	5483.84	1824.78	-1.58753	0	0	down
LOC_Os05g51450	2896.81	5189.69	603.939	-3.10421	0	0	down
LOC_Os05g51620	3376.27	6394.66	357.866	-4.15618	0	0	down
LOC_Os05g51830	3513.32	1500.03	5526.62	1.88145	0	0	up
LOC_Os06g01210	21047	42086.7	7.40929	-12.5058	0	0	down
LOC_Os06g01250	4484.72	8898.41	71.025	-6.96673	0	0	down
LOC_Os06g01400	1287.29	2196.52	378.055	-2.5393	0	0	down
LOC_Os06g01460	1407.52	2678.44	136.614	-4.29876	0	0	down
LOC_Os06g01500	1856.36	660.182	3052.53	2.20878	0	0	up
LOC_Os06g01850	13252.7	26491.8	13.5525	-10.9313	0	0	down
LOC_Os06g02000	1112.1	198.503	2025.7	3.3509	0	0	up
LOC_Os06g02144	6943.76	3658.07	10229.4	1.48347	0	0	up
LOC_Os06g02370	6743.78	3045.36	10442.2	1.77793	0	0	up
LOC_Os06g02380	6834.61	10603.1	3066.13	-1.79033	0	0	down
LOC_Os06g02500	866.549	1571.46	161.641	-3.28166	0	0	down
LOC_Os06g03990	3656.92	6808.81	505.037	-3.75122	0	0	down
LOC_Os06g04270	33519.9	57899.3	9140.48	-2.66339	0	0	down
LOC_Os06g04920	963.598	1795.21	131.987	-3.76797	0	0	down
LOC_Os06g05080	1768.14	527.129	3009.16	2.51169	0	0	up
LOC_Os06g05390	2356.57	4424.24	288.907	-3.94136	0	0	down
LOC_Os06g05630	1684.73	3036.37	333.101	-3.19349	0	0	down
LOC_Os06g06470	1422.28	445.01	2399.55	2.43197	0	0	up
LOC_Os06g08670	2163.84	4230.96	96.7256	-5.45008	0	0	down
LOC_Os06g09090	1019.92	1927.92	111.913	-4.10106	0	0	down
LOC_Os06g09450	19419.1	4923.84	33914.3	2.78401	0	0	up
LOC_Os06g09890	11105.9	16644.4	5567.51	-1.57957	0	0	down
LOC_Os06g09900	5357.92	10154	561.848	-4.17482	0	0	down
LOC_Os06g11380	3240.81	5527.79	953.834	-2.53642	0	0	down
LOC_Os06g11800	1040.55	185.154	1895.94	3.3551	0	0	up
LOC_Os06g11860	2204.14	814.529	3593.76	2.14117	0	0	up
LOC_Os06g12630	2581.05	4963.41	198.694	-4.64439	0	0	down
LOC_Os06g13660	4630.09	9130.61	129.568	-6.1443	0	0	down
LOC_Os06g13810	6103.38	2730.54	9476.21	1.79503	0	0	up
LOC_Os06g16350	1228.76	368.954	2088.56	2.5003	0	0	up
LOC_Os06g17970	4193.52	8213.05	173.992	-5.56311	0	0	down
LOC_Os06g18010	1816.31	3594.68	37.9361	-6.57532	0	0	down
LOC_Os06g18670	3571.7	7133.14	10.25	-9.4428	0	0	down
LOC_Os06g19444	3936.82	6030.78	1842.86	-1.71023	0	0	down
LOC_Os06g20320	2319.75	4409.84	229.656	-4.26277	0	0	down
LOC_Os06g21380	5355.96	10601.8	110.086	-6.59741	0	0	down
LOC_Os06g22060	1440.07	2733.27	146.86	-4.22083	0	0	down
LOC_Os06g22690	1813.3	3476.98	149.615	-4.52949	0	0	down
LOC_Os06g23274	1176.12	2246.41	105.836	-4.41839	0	0	down
LOC_Os06g24730	2838.33	4795.69	880.976	-2.44539	0	0	down
LOC_Os06g27560	3996.85	1801.42	6192.27	1.7812	0	0	up
LOC_Os06g33710	3809.85	6887.19	732.522	-3.23429	0	0	down
LOC_Os06g35160	1661.8	3217.29	106.316	-4.92868	0	0	down
LOC_Os06g36090	9264.15	13180.8	5347.53	-1.30093	0	0	down
LOC_Os06g37610	1858.58	3609.82	107.338	-5.07889	0	0	down
LOC_Os06g38320	1885.62	3427.78	343.468	-3.31831	0	0	down
LOC_Os06g38950	1056.42	78.4699	2034.38	4.69791	0	0	up
LOC_Os06g39040	1293.33	2302.75	283.909	-3.01739	0	0	down
LOC_Os06g40440	1255.11	2218.42	291.791	-2.92954	0	0	down
LOC_Os06g40640	15459.1	30869.1	49.1736	-9.30354	0	0	down
LOC_Os06g40940	28941.9	57538.9	344.912	-7.38013	0	0	down
LOC_Os06g42790	1956.49	3314.95	598.042	-2.47156	0	0	down
LOC_Os06g43140	1679.29	3169.21	189.372	-4.06516	0	0	down
LOC_Os06g43800	2577.24	5050.05	104.43	-5.5823	0	0	down
LOC_Os06g43860	3848.77	5898.5	1799.04	-1.71381	0	0	down
LOC_Os06g43900	2257.11	4440.99	73.2364	-5.92182	0	0	down
LOC_Os06g44170	713.618	1320.23	107.006	-3.6249	0	0	down
LOC_Os06g44450	8169.21	16296.3	42.1097	-8.58315	0	0	down
LOC_Os06g44500	1449.74	2513.53	385.958	-2.70353	0	0	down
LOC_Os06g45100	1212.58	2337.16	88	-4.73947	0	0	down
LOC_Os06g45370	1180.82	2331.84	29.787	-6.30184	0	0	down
LOC_Os06g45500	3125.03	1503.28	4746.78	1.65868	0	0	up
LOC_Os06g45820	17491.4	33735.5	1247.3	-4.75671	0	0	down
LOC_Os06g46670	1456.9	2573.05	340.739	-2.91681	0	0	down
LOC_Os06g46930	2271.38	4435.78	106.983	-5.38048	0	0	down
LOC_Os06g47130	1080.12	2100.1	60.1394	-5.13588	0	0	down
LOC_Os06g47550	2059.99	3386.55	733.431	-2.20616	0	0	down
LOC_Os06g47650	1995.51	713.13	3277.88	2.20078	0	0	up
LOC_Os06g48060	1150.29	237.27	2063.31	3.11808	0	0	up
LOC_Os06g48180	2009.38	785.062	3233.71	2.04164	0	0	up
LOC_Os06g48200	1306.35	2569.38	43.3157	-5.8875	0	0	down
LOC_Os06g48620	3082.01	5401.13	762.894	-2.82307	0	0	down
LOC_Os06g48810	1746.28	422.022	3070.54	2.86401	0	0	up
LOC_Os06g49110	3975.71	6664.94	1286.47	-2.37363	0	0	down
LOC_Os06g49120	4842.31	9670.97	13.6524	-9.47739	0	0	down
LOC_Os06g49640	1408.06	2765.72	50.4003	-5.77958	0	0	down
LOC_Os06g49790	3478.72	5558.79	1398.66	-1.99207	0	0	down
LOC_Os06g49880	998.777	190.619	1806.94	3.24437	0	0	up
LOC_Os06g50070	754.094	1387.72	120.47	-3.52519	0	0	down
LOC_Os06g50420	1385.85	236.475	2535.22	3.42107	0	0	up
LOC_Os06g50870	1127.74	1960.89	294.592	-2.73979	0	0	down
LOC_Os06g50920	797.664	104.77	1490.56	3.83134	0	0	up
LOC_Os06g51029	6786.79	13008.7	564.879	-4.52315	0	0	down
LOC_Os06g51060	1375.22	2434.44	315.996	-2.95125	0	0	down
LOC_Os06g51150	7994.28	2390.58	13598	2.50798	0	0	up
LOC_Os06g51290	4129.48	8111.58	147.382	-5.782	0	0	down
LOC_Os06g51360	1245.8	2133.61	357.986	-2.575	0	0	down
LOC_Os06g51410	1998.74	767.859	3229.62	2.07281	0	0	up
LOC_Os07g01020	4132.65	7406.46	858.84	-3.10914	0	0	down
LOC_Os07g01030	2103.07	3924.19	281.953	-3.79804	0	0	down
LOC_Os07g01214	1551.51	2833.24	269.774	-3.3915	0	0	down
LOC_Os07g01560	2557.78	643.706	4471.85	2.79592	0	0	up
LOC_Os07g01760	33810.2	64370.8	3249.56	-4.30788	0	0	down
LOC_Os07g04180	3675.57	6119.2	1231.93	-2.31239	0	0	down
LOC_Os07g04240	4335.74	2287.15	6384.33	1.48059	0	0	up
LOC_Os07g05010	1327.3	2485.18	169.415	-3.87882	0	0	down
LOC_Os07g05040	841.093	1545.67	136.517	-3.50077	0	0	down
LOC_Os07g05620	4580.85	1325.19	7836.52	2.56389	0	0	up
LOC_Os07g05820	29103.6	58113.9	93.2991	-9.28487	0	0	down
LOC_Os07g06450	1786.5	3542.04	30.9543	-6.83403	0	0	down
LOC_Os07g06660	2597.08	5042.98	151.175	-5.06593	0	0	down
LOC_Os07g06840	1236.98	2304.38	169.577	-3.75727	0	0	down
LOC_Os07g07310	1356.03	2574.93	137.131	-4.23033	0	0	down
LOC_Os07g07790	1600.63	78.3189	3122.94	5.31687	0	0	up
LOC_Os07g07930	3334.24	936.089	5732.39	2.61426	0	0	up
LOC_Os07g08460	1370.58	2271.96	469.187	-2.27586	0	0	down
LOC_Os07g08970	3384.52	6474.33	294.708	-4.46141	0	0	down
LOC_Os07g09040	1567.12	3033.16	101.091	-4.91218	0	0	down
LOC_Os07g09150	1725.11	3052.39	397.836	-2.94494	0	0	down
LOC_Os07g09800	1139.52	2110.16	168.89	-3.6397	0	0	down
LOC_Os07g10490	3390.68	5517.37	1263.99	-2.12703	0	0	down
LOC_Os07g11110	7583.67	15159.9	7.47402	-10.9741	0	0	down
LOC_Os07g14270	9284.75	4065.25	14504.2	1.83516	0	0	up
LOC_Os07g14600	755.781	1403.08	108.485	-3.69583	0	0	down
LOC_Os07g15370	10390.5	472.65	20308.4	5.42489	0	0	up
LOC_Os07g15460	19998	30185.5	9810.48	-1.62124	0	0	down
LOC_Os07g15670	797.831	1499.03	96.6271	-3.96089	0	0	down
LOC_Os07g18720	1061.37	2038.42	84.3244	-4.59384	0	0	down
LOC_Os07g22930	3076.85	6008.27	145.421	-5.36433	0	0	down
LOC_Os07g23990	4916.24	9658.37	174.111	-5.79262	0	0	down
LOC_Os07g26110	3139.42	43.2265	6235.61	7.17295	0	0	up
LOC_Os07g26630	870.982	49.6949	1692.27	5.08668	0	0	up
LOC_Os07g28090	844.639	1556.7	132.576	-3.55321	0	0	down
LOC_Os07g28480	1617.99	3180.83	55.1436	-5.84211	0	0	down
LOC_Os07g28610	2689.31	5360.61	18.0017	-8.2351	0	0	down
LOC_Os07g28790	729.224	1380.92	77.5264	-4.15523	0	0	down
LOC_Os07g28890	1193.61	167.171	2220.05	3.73224	0	0	up
LOC_Os07g30200	1857.64	3164.42	550.851	-2.5207	0	0	down
LOC_Os07g31884	2260.2	4462.61	57.797	-6.28284	0	0	down
LOC_Os07g32560	815.712	1570.32	61.102	-4.70033	0	0	down
LOC_Os07g32570	2246.3	3758.7	733.9	-2.35877	0	0	down
LOC_Os07g32630	1803.57	3586.49	20.6397	-7.45051	0	0	down
LOC_Os07g32880	11387.9	22558	217.863	-6.69001	0	0	down
LOC_Os07g33300	2957.59	4464	1451.19	-1.62164	0	0	down
LOC_Os07g33660	1386.97	2744.35	29.5986	-6.53755	0	0	down
LOC_Os07g35370	1832.35	628.765	3035.94	2.271	0	0	up
LOC_Os07g37030	8215.88	16414.9	16.83	-9.95098	0	0	down
LOC_Os07g37230	2250.35	4452.76	47.9324	-6.52883	0	0	down
LOC_Os07g37240	7841.98	15674	9.95705	-10.6216	0	0	down
LOC_Os07g37250	5406.92	10359.4	454.466	-4.50952	0	0	down
LOC_Os07g37620	1261.36	2275.48	247.238	-3.20244	0	0	down
LOC_Os07g37830	1720.49	3239.72	201.263	-4.00794	0	0	down
LOC_Os07g38300	2021.31	3854.52	188.106	-4.36044	0	0	down
LOC_Os07g38850	1055.2	1890.82	219.581	-3.1064	0	0	down
LOC_Os07g39350	8652.73	14809	2496.45	-2.56848	0	0	down
LOC_Os07g41080	1187.2	2159.21	215.201	-3.32648	0	0	down
LOC_Os07g42370	11827.1	17686.2	5967.93	-1.56711	0	0	down
LOC_Os07g42510	1363.03	317.454	2408.61	2.92389	0	0	up
LOC_Os07g42626	1423.04	312.748	2533.33	3.01826	0	0	up
LOC_Os07g43330	1401.59	2428.75	374.442	-2.69965	0	0	down
LOC_Os07g43810	1687.04	3269.85	104.229	-4.96674	0	0	down
LOC_Os07g43925	728.874	1408.74	49.0077	-4.83407	0	0	down
LOC_Os07g44060	2900.17	730.72	5069.62	2.79359	0	0	up
LOC_Os07g44330	11740.6	22673.3	807.959	-4.81163	0	0	down
LOC_Os07g44440	957.822	115.974	1799.67	3.95489	0	0	up
LOC_Os07g45080	2036.17	27.3312	4045.01	7.20258	0	0	up
LOC_Os07g46340	2605.61	4237.25	973.97	-2.12109	0	0	down
LOC_Os07g46410	3690	6936	444.01	-3.96458	0	0	down
LOC_Os07g46460	48610.5	90748.3	6472.7	-3.80893	0	0	down
LOC_Os07g46520	1977.38	3523.53	431.232	-3.02967	0	0	down
LOC_Os07g46780	1334.41	2650.45	18.3602	-7.17113	0	0	down
LOC_Os07g46790	4962.47	8688.56	1236.38	-2.81163	0	0	down
LOC_Os07g47750	1085.12	266.682	1903.55	2.8362	0	0	up
LOC_Os07g47990	1309.16	117.085	2501.23	4.4163	0	0	up
LOC_Os07g48020	1992.09	3386.66	597.525	-2.50501	0	0	down
LOC_Os07g48460	1005.93	82.4206	1929.43	4.54949	0	0	up
LOC_Os07g48500	4530.93	8967.11	94.7459	-6.56568	0	0	down
LOC_Os07g48630	4943.2	8556.58	1329.83	-2.68502	0	0	down
LOC_Os07g48770	1405.24	2693.88	116.597	-4.54178	0	0	down
LOC_Os07g49110	8671.84	16879.2	464.51	-5.18358	0	0	down
LOC_Os07g49310	3638.78	7234.46	43.0964	-7.38107	0	0	down
LOC_Os07g49520	2437.22	1019.51	3854.92	1.91902	0	0	up
LOC_Os08g01170	1263.87	2490.98	36.756	-6.07059	0	0	down
LOC_Os08g01770	2824.42	5066.25	582.583	-3.12001	0	0	down
LOC_Os08g02120	9063.18	4038.67	14087.7	1.8025	0	0	up
LOC_Os08g02490	2273.96	600.18	3947.75	2.71711	0	0	up
LOC_Os08g03350	11215.4	4363.05	18067.7	2.05014	0	0	up
LOC_Os08g04840	6095.91	11340.7	851.062	-3.73588	0	0	down
LOC_Os08g05620	1166.44	2270.3	62.589	-5.18475	0	0	down
LOC_Os08g06110	20898.4	38758.6	3038.34	-3.67251	0	0	down
LOC_Os08g06280	1883	3415.7	350.292	-3.29063	0	0	down
LOC_Os08g06630	794.891	1545.73	44.0556	-5.1248	0	0	down
LOC_Os08g07010	1562.86	394.048	2731.66	2.79274	0	0	up
LOC_Os08g07540	1319.36	2460.28	178.453	-3.78313	0	0	down
LOC_Os08g07774	2403.03	4489.6	316.467	-3.82713	0	0	down
LOC_Os08g08120	1214.56	2227.46	201.669	-3.46698	0	0	down
LOC_Os08g08840	4600.19	2309.81	6890.57	1.57666	0	0	up
LOC_Os08g08970	3297.39	91.2079	6503.58	6.15624	0	0	up
LOC_Os08g08980	1665.2	143.508	3186.89	4.47541	0	0	up
LOC_Os08g09200	8581.27	4706.36	12456.2	1.40425	0	0	up
LOC_Os08g10020	37884.4	75760.2	8.56695	-13.0813	0	0	down
LOC_Os08g10250	1351.58	2297.9	405.269	-2.50222	0	0	down
LOC_Os08g10310	883.695	1683.41	83.9786	-4.31879	0	0	down
LOC_Os08g10330	1699.59	52.8056	3346.36	5.98756	0	0	up
LOC_Os08g10480	3959.54	1687.42	6231.66	1.88467	0	0	up
LOC_Os08g13930	3939.38	6139.36	1739.4	-1.82041	0	0	down
LOC_Os08g14440	6671.47	12851	491.925	-4.70898	0	0	down
LOC_Os08g14760	1278.58	104.025	2453.14	4.55966	0	0	up
LOC_Os08g15050	864.138	1594.64	133.633	-3.58282	0	0	down
LOC_Os08g15230	5708.92	9892.9	1524.95	-2.69759	0	0	down
LOC_Os08g15460	1068.17	1882.22	254.108	-2.8899	0	0	down
LOC_Os08g15840	1509.47	476.052	2542.89	2.41704	0	0	up
LOC_Os08g16570	1612.28	3110.94	113.607	-4.77122	0	0	down
LOC_Os08g19114	2646.03	4167.3	1124.76	-1.88964	0	0	down
LOC_Os08g21879	777.34	1449.72	104.965	-3.78817	0	0	down
LOC_Os08g23810	1440.24	447.862	2432.62	2.44101	0	0	up
LOC_Os08g24390	1445.49	2815.69	75.2868	-5.22327	0	0	down
LOC_Os08g25720	5029	2172.19	7885.81	1.86036	0	0	up
LOC_Os08g25734	4990.18	9338.99	641.372	-3.86497	0	0	down
LOC_Os08g27840	8709.68	14771.3	2648.04	-2.47929	0	0	down
LOC_Os08g28670	1858.1	148.693	3567.51	4.58178	0	0	up
LOC_Os08g29370	1855.65	3668.17	43.1219	-6.41086	0	0	down
LOC_Os08g29570	1176.73	2058.18	295.268	-2.80063	0	0	down
LOC_Os08g30740	3129.62	679.936	5579.31	3.03722	0	0	up
LOC_Os08g30770	3765.47	97.9514	7432.99	6.2483	0	0	up
LOC_Os08g31410	1757.85	3233.52	282.179	-3.51959	0	0	down
LOC_Os08g31510	4901.51	8458.14	1344.88	-2.65193	0	0	down
LOC_Os08g31830	1094.81	223.291	1966.33	3.13579	0	0	up
LOC_Os08g31910	1820.31	3528.27	112.34	-4.9786	0	0	down
LOC_Os08g32630	1318.21	2593.93	42.4899	-5.9406	0	0	down
LOC_Os08g33420	3761.85	5614.43	1909.27	-1.55624	0	0	down
LOC_Os08g34150	2088.54	3399.94	777.13	-2.1289	0	0	down
LOC_Os08g34210	8954.27	16383.1	1525.46	-3.42468	0	0	down
LOC_Os08g34220	1701.67	3252.89	150.454	-4.43702	0	0	down
LOC_Os08g34280	3986.38	1797.95	6174.82	1.77938	0	0	up
LOC_Os08g34984	1382.37	2593.65	171.084	-3.92937	0	0	down
LOC_Os08g35620	3525.63	5806.72	1244.54	-2.22217	0	0	down
LOC_Os08g36480	4189.05	7958.09	420.018	-4.2432	0	0	down
LOC_Os08g37250	2879.52	108.188	5650.85	5.70415	0	0	up
LOC_Os08g37370	8486.12	12740.9	4231.29	-1.59008	0	0	down
LOC_Os08g37432	2078.93	4089.09	68.7711	-5.89462	0	0	down
LOC_Os08g37580	2569.55	4018.62	1120.48	-1.84287	0	0	down
LOC_Os08g37610	3906.41	6631.74	1181.09	-2.48861	0	0	down
LOC_Os08g37790	3115.27	4916.53	1314.01	-1.90481	0	0	down
LOC_Os08g38910	1352.74	2642.1	63.3784	-5.38306	0	0	down
LOC_Os08g39300	37122.5	74135.8	109.18	-9.40055	0	0	down
LOC_Os08g40919	1657.98	2983.1	332.856	-3.16026	0	0	down
LOC_Os08g41460	4526.17	8555.21	497.135	-4.10953	0	0	down
LOC_Os08g41990	2692.68	4307.19	1078.18	-1.99954	0	0	down
LOC_Os08g43400	3747.85	6589.65	906.052	-2.86153	0	0	down
LOC_Os08g43560	7334.68	12333.4	2335.91	-2.4004	0	0	down
LOC_Os08g44000	3062.79	5954.45	171.128	-5.11996	0	0	down
LOC_Os08g44290	3303.26	6330.9	275.61	-4.52325	0	0	down
LOC_Os08g44360	3131.96	575.792	5688.13	3.30474	0	0	up
LOC_Os08g44400	2531.28	4866.1	196.467	-4.63163	0	0	down
LOC_Os08g44640	1267.38	2371.75	163.009	-3.8624	0	0	down
LOC_Os08g44680	6331.75	12651.2	12.2818	-9.99949	0	0	down
LOC_Os08g44770	2298.66	3913.96	683.366	-2.51917	0	0	down
LOC_Os08g44810	4435.99	8581.5	290.492	-4.88522	0	0	down
LOC_Os08g44870	1674.04	2995.52	352.563	-3.08631	0	0	down
LOC_Os08g45180	1450.67	2614.91	286.424	-3.18832	0	0	down
LOC_Os09g02214	2178.58	3771.23	585.935	-2.68549	0	0	down
LOC_Os09g02710	2766.55	4859.22	673.871	-2.85134	0	0	down
LOC_Os09g04440	3097.92	4847.62	1348.23	-1.84481	0	0	down
LOC_Os09g04730	2929.23	1411.34	4447.13	1.65571	0	0	up
LOC_Os09g04790	2628.91	4298.94	958.875	-2.16549	0	0	down
LOC_Os09g06499	1977.63	3218.76	736.493	-2.12574	0	0	down
LOC_Os09g07460	4847.06	350.803	9343.33	4.7364	0	0	up
LOC_Os09g07570	3123.36	5876.47	370.261	-3.98929	0	0	down
LOC_Os09g07660	963.231	1808.5	117.959	-3.93011	0	0	down
LOC_Os09g07830	2563.77	1056.39	4071.16	1.94656	0	0	up
LOC_Os09g10760	1226.86	2356.03	97.6954	-4.59189	0	0	down
LOC_Os09g10840	1724.85	222.265	3227.43	3.85856	0	0	up
LOC_Os09g12240	1160.49	62.8715	2258.11	5.16431	0	0	up
LOC_Os09g16090	1269.17	219.643	2318.7	3.39954	0	0	up
LOC_Os09g20930	3788.84	5809.7	1767.98	-1.716	0	0	down
LOC_Os09g24700	5928.83	8609.46	3248.21	-1.40654	0	0	down
LOC_Os09g24924	1271.79	2230.87	312.714	-2.835	0	0	down
LOC_Os09g25550	961.786	1754.49	169.084	-3.37079	0	0	down
LOC_Os09g25810	901.082	1653.46	148.701	-3.47375	0	0	down
LOC_Os09g25850	1154.83	2279.71	29.9376	-6.24117	0	0	down
LOC_Os09g26190	1129.29	2136.43	122.145	-4.12295	0	0	down
LOC_Os09g26570	1716.33	3035.54	397.12	-2.93566	0	0	down
LOC_Os09g26620	9318.3	3531.38	15105.2	2.09657	0	0	up
LOC_Os09g26900	1286.74	406.456	2167.03	2.41428	0	0	up
LOC_Os09g27050	3737.82	5950.67	1524.96	-1.96462	0	0	down
LOC_Os09g27500	2524.55	24.6238	5024.48	7.67794	0	0	up
LOC_Os09g27750	1429.01	2806.24	51.7772	-5.75841	0	0	down
LOC_Os09g28050	11198.5	5199.16	17197.8	1.72573	0	0	up
LOC_Os09g28310	1668.9	2731.28	606.517	-2.17132	0	0	down
LOC_Os09g29660	1322.26	262.145	2382.37	3.18312	0	0	up
LOC_Os09g29930	2666.54	4233.71	1099.37	-1.94545	0	0	down
LOC_Os09g31080	9630.52	1456.08	17804.9	3.61184	0	0	up
LOC_Os09g31130	1144.77	2219.59	69.9424	-4.99919	0	0	down
LOC_Os09g31514	1382.57	2718.46	46.6918	-5.85378	0	0	down
LOC_Os09g32240	2587.96	4574.68	601.247	-2.92794	0	0	down
LOC_Os09g32320	1323.89	379.808	2267.98	2.57912	0	0	up
LOC_Os09g33680	7099.91	11096.7	3103.1	-1.83876	0	0	down
LOC_Os09g33830	1397.45	178.233	2616.67	3.87522	0	0	up
LOC_Os09g34280	3740.03	6166.98	1313.07	-2.23111	0	0	down
LOC_Os09g34340	796.22	1484.62	107.818	-3.77604	0	0	down
LOC_Os09g35730	3767.11	5759.46	1774.75	-1.69866	0	0	down
LOC_Os09g35760	1173.75	2270.7	76.8014	-4.89479	0	0	down
LOC_Os09g36130	1113.03	2090.5	135.571	-3.95347	0	0	down
LOC_Os09g36240	1081.79	1969.93	193.655	-3.34535	0	0	down
LOC_Os09g36450	11478.5	19280.8	3676.28	-2.39123	0	0	down
LOC_Os09g36860	1370.67	357.271	2384.07	2.73787	0	0	up
LOC_Os09g38130	3879.3	7508.21	250.391	-4.90848	0	0	down
LOC_Os09g38400	1617.63	504.15	2731.12	2.43783	0	0	up
LOC_Os09g38410	1807.94	3397.6	218.283	-3.95706	0	0	down
LOC_Os09g38960	3281.9	5326.92	1236.88	-2.10615	0	0	down
LOC_Os09g39180	3918.4	7422.46	414.329	-4.16483	0	0	down
LOC_Os09g39190	1002.77	169.288	1836.25	3.43715	0	0	up
LOC_Os09g39390	5760.67	11309	212.375	-5.73551	0	0	down
LOC_Os09g39560	2582.95	4440.18	725.722	-2.61173	0	0	down
LOC_Os09g39680	5589.78	10518.6	660.936	-3.99079	0	0	down
LOC_Os10g01134	1026.29	1987.12	65.4624	-4.92481	0	0	down
LOC_Os10g02070	1376.29	389.072	2363.51	2.60214	0	0	up
LOC_Os10g02240	1281.81	2386.13	177.478	-3.74491	0	0	down
LOC_Os10g02480	1776.38	3484.43	68.3213	-5.68188	0	0	down
LOC_Os10g04270	1274.53	290.37	2258.7	2.95881	0	0	up
LOC_Os10g07556	2193.33	126.91	4259.75	5.07069	0	0	up
LOC_Os10g08550	17193.5	9141.02	25246	1.46568	0	0	up
LOC_Os10g10170	3265.18	6486.13	44.2309	-7.1841	0	0	down
LOC_Os10g11140	2677.2	5309.87	44.5199	-6.90441	0	0	down
LOC_Os10g11500	6377.37	15.6894	12739.1	9.66012	0	0	up
LOC_Os10g16974	3404.96	5749.66	1060.27	-2.43858	0	0	down
LOC_Os10g17260	2248.65	3610.1	887.21	-2.02436	0	0	down
LOC_Os10g17650	1555.35	40.7404	3069.97	6.23878	0	0	up
LOC_Os10g18370	7389.64	14761.9	17.4028	-9.72167	0	0	down
LOC_Os10g20470	925.869	1710.32	141.422	-3.59654	0	0	down
LOC_Os10g21910	8102.95	12205.7	4000.22	-1.60866	0	0	down
LOC_Os10g22050	1179.6	218.701	2140.5	3.29059	0	0	up
LOC_Os10g22560	3493.19	6784.73	201.642	-5.0722	0	0	down
LOC_Os10g22570	2035.25	638.589	3431.91	2.42603	0	0	up
LOC_Os10g25150	3098.56	601.265	5595.85	3.2173	0	0	up
LOC_Os10g25290	1008.84	1870.54	147.144	-3.67096	0	0	down
LOC_Os10g25570	1417.07	2654.97	179.162	-3.8864	0	0	down
LOC_Os10g25780	5495.54	1320.4	9670.67	2.87296	0	0	up
LOC_Os10g26620	7535.35	12183.8	2886.88	-2.07723	0	0	down
LOC_Os10g28020	4059.17	6245.98	1872.36	-1.7369	0	0	down
LOC_Os10g28360	1440.54	2680.96	200.111	-3.74502	0	0	down
LOC_Os10g30156	1357.63	2267.33	447.921	-2.3398	0	0	down
LOC_Os10g31040	3698.79	7005.31	392.272	-4.16197	0	0	down
LOC_Os10g32550	2645.09	747.963	4542.21	2.60255	0	0	up
LOC_Os10g32700	1398.9	67.0273	2730.77	5.34849	0	0	up
LOC_Os10g33170	1145.1	2103.85	186.348	-3.50085	0	0	down
LOC_Os10g33420	4232.04	6396.17	2067.92	-1.62862	0	0	down
LOC_Os10g33440	1572.02	176.658	2967.39	4.07153	0	0	up
LOC_Os10g33960	2106.15	3522.89	689.407	-2.35401	0	0	down
LOC_Os10g34400	3929.86	6487.53	1372.18	-2.24152	0	0	down
LOC_Os10g34930	1122.29	2204.14	40.4292	-5.75985	0	0	down
LOC_Os10g35010	3198.95	4969.38	1428.52	-1.79857	0	0	down
LOC_Os10g35030	13143.7	26228.8	58.5904	-8.79464	0	0	down
LOC_Os10g35110	6117.47	2945.16	9289.79	1.65729	0	0	up
LOC_Os10g35810	904.682	1774.51	34.8524	-5.66532	0	0	down
LOC_Os10g35840	3766.84	6624.56	909.118	-2.86627	0	0	down
LOC_Os10g35940	856.504	1641.17	71.8365	-4.51006	0	0	down
LOC_Os10g36000	3097.9	5223.55	972.244	-2.42549	0	0	down
LOC_Os10g36924	2490.74	1024.35	3957.13	1.94959	0	0	up
LOC_Os10g37240	5140.38	7870.15	2410.6	-1.70628	0	0	down
LOC_Os10g37340	922.495	1734.11	110.877	-3.96005	0	0	down
LOC_Os10g37400	1790.89	568.958	3012.82	2.40414	0	0	up
LOC_Os10g37980	3635.26	5557.81	1712.71	-1.69842	0	0	down
LOC_Os10g38140	1228.54	2410.78	46.2952	-5.6989	0	0	down
LOC_Os10g38700	1790.93	3469.26	112.604	-4.94373	0	0	down
LOC_Os10g39170	986.4	195.383	1777.42	3.18495	0	0	up
LOC_Os10g39520	1179.51	1989.13	369.892	-2.42608	0	0	down
LOC_Os10g39930	1086.62	2103.44	69.7993	-4.91587	0	0	down
LOC_Os10g40030	1198.37	2238.82	157.929	-3.8269	0	0	down
LOC_Os10g40510	1681.01	25.4764	3336.55	7.02404	0	0	up
LOC_Os10g40530	3050.99	86.1311	6015.85	6.13297	0	0	up
LOC_Os10g40570	1243.52	2167.48	319.553	-2.76037	0	0	down
LOC_Os10g40700	1620.33	143.132	3097.54	4.43497	0	0	up
LOC_Os10g40710	3297.83	384.061	6211.6	4.01414	0	0	up
LOC_Os10g40720	4205.2	6671.1	1739.3	-1.93975	0	0	down
LOC_Os10g40740	4947.23	9883.82	10.6331	-9.87136	0	0	down
LOC_Os10g41200	3343.6	5261.74	1425.46	-1.88431	0	0	down
LOC_Os10g41400	3266.25	5474.56	1057.93	-2.3717	0	0	down
LOC_Os10g41410	1818.84	472.08	3165.59	2.74471	0	0	up
LOC_Os10g41550	8008.47	15649.9	367.059	-5.41097	0	0	down
LOC_Os10g41780	4471.79	8713.84	229.738	-5.25002	0	0	down
LOC_Os10g42230	1852.4	419.504	3285.3	2.96982	0	0	up
LOC_Os10g42240	2265.89	4447.66	84.1165	-5.71994	0	0	down
LOC_Os10g42299	10129.1	18464.3	1793.94	-3.36336	0	0	down
LOC_Os10g42700	900.882	1650.31	151.452	-3.4423	0	0	down
LOC_Os10g42780	3979.27	7169.59	788.948	-3.18607	0	0	down
LOC_Os11g01330	2720.46	4244.24	1196.68	-1.82643	0	0	down
LOC_Os11g01439	6707.01	13355	58.9978	-7.83452	0	0	down
LOC_Os11g01590	784.197	1502.08	66.3147	-4.49566	0	0	down
LOC_Os11g02080	1097.95	156.105	2039.79	3.70613	0	0	up
LOC_Os11g02350	2681.65	4853.92	509.374	-3.25194	0	0	down
LOC_Os11g02369	8631.67	17215.9	47.4268	-8.51542	0	0	down
LOC_Os11g03730	4073.99	1364.5	6783.48	2.314	0	0	up
LOC_Os11g04020	8214.57	139.101	16290	6.87104	0	0	up
LOC_Os11g04350	1199.87	89.2477	2310.49	4.69265	0	0	up
LOC_Os11g05260	982.647	1919.12	46.1737	-5.38735	0	0	down
LOC_Os11g05390	3319.7	560.247	6079.15	3.4393	0	0	up
LOC_Os11g05480	1862.49	42.2336	3682.74	6.45001	0	0	up
LOC_Os11g05552	1045	1946.28	143.716	-3.74978	0	0	down
LOC_Os11g05556	1897.7	3657.05	138.349	-4.72128	0	0	down
LOC_Os11g05700	5880.68	8691.77	3069.58	-1.50123	0	0	down
LOC_Os11g05990	3636.9	6497.96	775.835	-3.06665	0	0	down
LOC_Os11g06020	3307.56	5914.45	700.658	-3.07667	0	0	down
LOC_Os11g06980	2062.49	4076.86	48.1268	-6.41	0	0	down
LOC_Os11g07020	85169.1	170331	7.28016	-14.5228	0	0	down
LOC_Os11g08670	2833.28	5125.99	540.578	-3.24576	0	0	down
LOC_Os11g09280	7862.74	2841.38	12884.1	2.18071	0	0	up
LOC_Os11g09680	1249.5	2464.84	34.1523	-6.17635	0	0	down
LOC_Os11g10480	1984.54	3283.48	685.593	-2.25986	0	0	down
LOC_Os11g10510	7855.52	43.7941	15667.2	8.48984	0	0	up
LOC_Os11g11000	5994.78	11389.8	599.712	-4.24648	0	0	down
LOC_Os11g12050	1346.32	2360.45	332.19	-2.82622	0	0	down
LOC_Os11g12740	1007.86	211.517	1804.2	3.09133	0	0	up
LOC_Os11g12810	2904.98	5682.37	127.595	-5.48354	0	0	down
LOC_Os11g13850	3137.5	6224.51	50.4959	-6.94143	0	0	down
LOC_Os11g13890	5541.98	10983.5	100.449	-6.77345	0	0	down
LOC_Os11g14050	2836.27	281.716	5390.81	4.25879	0	0	up
LOC_Os11g14220	34040.7	20561.2	47520.3	1.2086	0	0	up
LOC_Os11g16550	2150.74	4194.86	106.619	-5.30051	0	0	down
LOC_Os11g17290	8385.73	13479	3292.43	-2.03415	0	0	down
LOC_Os11g22350	2035.64	4053.63	17.6444	-7.83269	0	0	down
LOC_Os11g23790	2827.31	5477.64	176.978	-4.94993	0	0	down
LOC_Os11g26890	2221.9	4067.56	376.232	-3.43279	0	0	down
LOC_Os11g29370	10022.7	3694.9	16350.5	2.14576	0	0	up
LOC_Os11g31090	2860.86	402.148	5319.57	3.72451	0	0	up
LOC_Os11g31190	1631.63	556.83	2706.44	2.27952	0	0	up
LOC_Os11g31900	2615.02	4953.34	276.706	-4.1619	0	0	down
LOC_Os11g32320	1746.94	3136.48	357.406	-3.13802	0	0	down
LOC_Os11g32500	2037.03	3952.5	121.57	-5.02683	0	0	down
LOC_Os11g32650	9707.23	19387.3	27.1493	-9.46711	0	0	down
LOC_Os11g34940	757.542	1427.85	87.2372	-4.03872	0	0	down
LOC_Os11g35340	801.604	106.764	1496.44	3.80725	0	0	up
LOC_Os11g36440	1477.96	2442.24	513.684	-2.24962	0	0	down
LOC_Os11g37560	1138.28	2144.42	132.136	-4.01887	0	0	down
LOC_Os11g37700	2022.02	202.232	3841.8	4.24851	0	0	up
LOC_Os11g37990	1426.31	2631.21	221.413	-3.57602	0	0	down
LOC_Os11g38020	897.223	1640.83	153.618	-3.41833	0	0	down
LOC_Os11g38810	3365.75	5871.07	860.431	-2.77027	0	0	down
LOC_Os11g39020	12971.5	25278.5	664.439	-5.25081	0	0	down
LOC_Os11g40590	1761.96	235.891	3288.03	3.79968	0	0	up
LOC_Os11g41910	1616.08	2914.94	317.215	-3.20108	0	0	down
LOC_Os11g42490	1883.14	3743.48	22.7954	-7.35256	0	0	down
LOC_Os11g42550	2269.19	4522.06	16.3241	-8.09168	0	0	down
LOC_Os11g42960	3403.97	188.212	6619.73	5.13613	0	0	up
LOC_Os11g43600	985.773	1819.36	152.182	-3.58114	0	0	down
LOC_Os11g43860	3145.3	5673.31	617.277	-3.20068	0	0	down
LOC_Os11g43990	688.588	1317.79	59.3901	-4.47187	0	0	down
LOC_Os11g44680	2316.51	395.199	4237.83	3.42398	0	0	up
LOC_Os11g47460	2205.9	336.963	4074.84	3.59486	0	0	up
LOC_Os11g47809	73403.4	14319.8	132487	3.20975	0	0	up
LOC_Os11g47840	1463.66	262.474	2664.85	3.34507	0	0	up
LOC_Os11g47970	135334	270665	3.84853	-16.0756	0	0	down
LOC_Os12g02250	2759.23	4444.6	1073.87	-2.04909	0	0	down
LOC_Os12g02300	1674.36	2998.48	350.243	-3.09339	0	0	down
LOC_Os12g02370	2962.86	5283.85	641.867	-3.04435	0	0	down
LOC_Os12g03200	1908.8	3749.69	67.9024	-5.77666	0	0	down
LOC_Os12g06490	5027.79	1166.16	8889.41	2.93047	0	0	up
LOC_Os12g07110	3502.63	6989.95	15.3151	-8.85682	0	0	down
LOC_Os12g07190	1744.97	2867.65	622.278	-2.20337	0	0	down
LOC_Os12g07280	1599.23	549.355	2649.1	2.26913	0	0	up
LOC_Os12g07370	1020.58	1841.22	199.94	-3.205	0	0	down
LOC_Os12g07540	1074.58	1871.21	277.94	-2.75422	0	0	down
LOC_Os12g08220	1063.98	1987.68	140.273	-3.82786	0	0	down
LOC_Os12g08260	3127.76	5974.91	280.608	-4.41568	0	0	down
LOC_Os12g08730	11083.6	22098.5	68.6987	-8.32278	0	0	down
LOC_Os12g08760	16144.6	31830.1	459.046	-6.11118	0	0	down
LOC_Os12g08810	62499.4	120881	4117.72	-4.87562	0	0	down
LOC_Os12g12580	3605.96	6987.52	224.403	-4.96124	0	0	down
LOC_Os12g12850	6277.56	11941.6	613.502	-4.28459	0	0	down
LOC_Os12g13120	963.938	1867.25	60.6262	-4.95194	0	0	down
LOC_Os12g13340	64115.9	104646	23585.3	-2.14954	0	0	down
LOC_Os12g13350	2835.67	4856.23	815.124	-2.5721	0	0	down
LOC_Os12g13380	2964.94	987.015	4942.86	2.32463	0	0	up
LOC_Os12g13720	1439.68	405.409	2473.94	2.60879	0	0	up
LOC_Os12g14070	4680.3	7159.62	2200.98	-1.70209	0	0	down
LOC_Os12g16220	1540.12	2770.47	309.773	-3.16015	0	0	down
LOC_Os12g17910	4160.14	7698.39	621.896	-3.62979	0	0	down
LOC_Os12g18640	1217.23	2219.11	215.344	-3.36579	0	0	down
LOC_Os12g18729	7550.86	11746.6	3355.13	-1.80783	0	0	down
LOC_Os12g19304	1956.16	3461.16	451.169	-2.94071	0	0	down
LOC_Os12g19381	150057	300109	4.41916	-16.1174	0	0	down
LOC_Os12g19470	60168.5	120321	16.3585	-12.8514	0	0	down
LOC_Os12g19530	1613.22	3068.23	158.201	-4.28328	0	0	down
LOC_Os12g21710	1420.15	2312.43	527.879	-2.13112	0	0	down
LOC_Os12g25690	7939.85	3017.56	12862.1	2.09151	0	0	up
LOC_Os12g29220	3384.46	5675.71	1093.21	-2.37493	0	0	down
LOC_Os12g32760	3378.8	6569.07	188.528	-5.12551	0	0	down
LOC_Os12g33120	8500.66	16743.5	257.846	-6.02135	0	0	down
LOC_Os12g33150	1315.91	2349.44	282.377	-3.06167	0	0	down
LOC_Os12g34890	1417.11	2470.82	363.405	-2.76484	0	0	down
LOC_Os12g35630	4993.52	9873.66	113.382	-6.44807	0	0	down
LOC_Os12g36720	1288.57	264.052	2313.09	3.13097	0	0	up
LOC_Os12g37530	2103	3905.78	300.22	-3.69937	0	0	down
LOC_Os12g37550	4525.55	7082.26	1968.85	-1.84695	0	0	down
LOC_Os12g38010	4921.84	13.2318	9830.45	9.54234	0	0	up
LOC_Os12g38051	47836.7	71.1081	95602.3	10.395	0	0	up
LOC_Os12g38140	1859.44	153.126	3565.75	4.53912	0	0	up
LOC_Os12g38270	6051.5	1978.34	10124.7	2.356	0	0	up
LOC_Os12g38300	32401.3	33.5089	64769	10.9243	0	0	up
LOC_Os12g38640	3926.38	7825.3	27.4483	-8.15602	0	0	down
LOC_Os12g38730	1525.91	2790.47	261.358	-3.41744	0	0	down
LOC_Os12g39370	1508.48	2569.09	447.861	-2.51942	0	0	down
LOC_Os12g39860	12433.7	6245.39	18622.1	1.5761	0	0	up
LOC_Os12g40900	2122.97	663.546	3582.39	2.43323	0	0	up
LOC_Os12g42090	6320.88	11589.9	1051.87	-3.46209	0	0	down
LOC_Os12g42200	4373.31	37.7578	8708.87	7.85123	0	0	up
LOC_Os12g42300	2775.19	5378.07	172.321	-4.95883	0	0	down
LOC_Os12g43130	6037.8	11937	138.622	-6.43047	0	0	down
LOC_Os12g43720	1572.68	3034.83	110.521	-4.77784	0	0	down
LOC_Os12g44230	2574.29	1045.37	4103.21	1.97266	0	0	up
LOC_Os12g44310	5291.41	7984.79	2598.02	-1.61938	0	0	down
LOC_Os12g44370	1630.72	3074.69	186.749	-4.0404	0	0	down
novel.202	1052.24	170.187	1934.3	3.50727	0	0	up
novel.31	885.017	1700.67	69.3675	-4.61635	0	0	down
novel.388	1660.24	3294.24	26.2517	-6.9888	0	0	down
novel.449	3690.32	7038.78	341.854	-4.36575	0	0	down
novel.455	6726.37	9826.87	3625.87	-1.43851	0	0	down
novel.459	3798.48	1697.33	5899.63	1.79723	0	0	up
novel.870	3106.62	5812.75	400.491	-3.85972	0	0	down
novel.898	3699.78	7253.35	146.218	-5.63769	0	0	down
novel.906	31919.8	63813.1	26.6182	-11.2319	0	0	down
novel.917	7276.86	2178.96	12374.8	2.50566	0	0	up
novel.961	1840.37	3547.97	132.772	-4.73837	0	0	down
LOC_Os06g34570	1224.65	2041.67	407.627	-2.32505	4.87448e-308	9.05459e-307	down
LOC_Os01g49290	3080.69	1471.88	4689.5	1.67173	5.23946e-308	9.72525e-307	up
LOC_Os12g01140	709.456	1346.72	72.1927	-4.23365	5.29679e-307	9.8243e-306	down
LOC_Os04g26870	905.812	1645.39	166.229	-3.30955	8.86731e-307	1.64344e-305	down
LOC_Os05g33130	810.717	73.1197	1548.31	4.40873	9.73989e-307	1.80381e-305	up
LOC_Os01g37870	1093.23	1876.66	309.792	-2.59643	1.8562e-306	3.43509e-305	down
LOC_Os11g29230	693.848	1325.33	62.3688	-4.40889	2.33845e-306	4.3243e-305	down
LOC_Os06g08080	11584.9	7111.93	16057.9	1.17484	3.35237e-306	6.19462e-305	up
LOC_Os01g31690	23055.9	46106.6	5.27931	-13.135	3.60121e-306	6.64946e-305	down
LOC_Os01g66600	672.505	1283.19	61.8245	-4.37572	7.32011e-306	1.35061e-304	down
LOC_Os07g01410	16636.4	7.29793	33265.4	12.1492	1.02108e-305	1.88257e-304	up
LOC_Os01g03144	1756.18	2774.77	737.59	-1.91166	1.09133e-305	2.01058e-304	down
LOC_Os02g03410	2010.03	3155.27	864.791	-1.86886	1.21996e-305	2.24588e-304	down
LOC_Os06g45340	1010.17	1996.44	23.8935	-6.38926	1.63074e-305	2.99988e-304	down
LOC_Os01g61080	858.446	1521.63	195.26	-2.95847	1.65324e-305	3.039e-304	down
LOC_Os07g01130	1961.68	631.178	3292.18	2.38413	2.13476e-305	3.92124e-304	up
LOC_Os04g38870	14192.2	8491.65	19892.8	1.22804	3.02276e-305	5.54823e-304	up
LOC_Os04g45170	1221.28	356.374	2086.18	2.54912	3.89906e-305	7.15136e-304	up
LOC_Os06g44140	1789.59	718.903	2860.27	1.99215	6.95818e-305	1.27527e-303	up
LOC_Os12g01360	2744.53	4194.55	1294.51	-1.69658	1.03267e-304	1.89124e-303	down
LOC_Os03g52239	3004.46	4617.87	1391.06	-1.72985	1.52266e-304	2.78655e-303	down
LOC_Os05g19380	677.563	1292.47	62.6574	-4.35939	1.76477e-304	3.22723e-303	down
LOC_Os03g08270	4078.74	6066.61	2090.86	-1.53694	3.89415e-304	7.11596e-303	down
LOC_Os03g23980	752.579	1381.48	123.68	-3.48258	6.08774e-304	1.11162e-302	down
LOC_Os05g11510	720.081	1398.45	41.7132	-5.06116	6.43153e-304	1.17353e-302	down
LOC_Os12g39620	1267.95	2111.03	424.871	-2.31331	6.6549e-304	1.21339e-302	down
LOC_Os08g17390	4379.69	8750.44	8.92973	-9.91834	9.31357e-304	1.69689e-302	down
LOC_Os04g50950	818.935	56.1573	1581.71	4.81847	9.9264e-304	1.80722e-302	up
LOC_Os01g03040	687.21	1322.47	51.9559	-4.67216	2.11791e-303	3.85308e-302	down
LOC_Os05g07632	1060.84	1802.58	319.095	-2.49835	4.69981e-303	8.54397e-302	down
LOC_Os01g25600	824.969	1619.15	30.7851	-5.73194	3.65562e-302	6.64082e-301	down
LOC_Os03g25960	1174.78	2001.54	348.019	-2.52636	5.05085e-302	9.16867e-301	down
LOC_Os05g37080	701.988	1360.12	43.8563	-4.95904	7.22136e-302	1.30991e-300	down
LOC_Os01g31680	921.722	1608.2	235.244	-2.76959	7.49515e-302	1.35858e-300	down
LOC_Os01g07700	1295.86	2146.34	445.378	-2.26782	1.74757e-300	3.16534e-299	down
LOC_Os01g49310	2020.57	3135.99	905.154	-1.79153	2.91386e-300	5.27397e-299	down
LOC_Os08g03640	8926.25	5266.26	12586.2	1.25698	3.48261e-300	6.29875e-299	up
LOC_Os02g44980	2366.26	3732.72	999.793	-1.89851	4.15077e-300	7.50172e-299	down
LOC_Os03g48030	727.452	1416.98	37.9264	-5.23195	9.53399e-300	1.72183e-298	down
LOC_Os07g35510	757.497	81.5664	1433.43	4.13351	1.45903e-299	2.63307e-298	up
LOC_Os07g03710	862.455	44.5916	1680.32	5.23276	3.21173e-299	5.79189e-298	up
LOC_Os03g12530	829.781	1503.9	155.66	-3.26694	3.32245e-299	5.98719e-298	down
LOC_Os12g01570	694.993	1339.59	50.4011	-4.73393	5.57121e-299	1.00322e-297	down
LOC_Os08g19610	820.929	1458.83	183.031	-2.99638	6.2063e-299	1.11677e-297	down
LOC_Os04g59600	1181.9	1976.42	387.37	-2.3526	6.46013e-299	1.1616e-297	down
LOC_Os07g08030	5120.13	9381.77	858.479	-3.45106	3.25369e-298	5.84623e-297	down
LOC_Os08g30020	2625.53	3965.09	1285.96	-1.62498	3.52292e-298	6.32539e-297	down
LOC_Os04g54790	705.373	1347.91	62.8315	-4.42533	3.59263e-298	6.44588e-297	down
LOC_Os06g35060	755.229	93.0809	1417.38	3.92975	1.93858e-297	3.47567e-296	up
LOC_Os01g19260	779.525	57.8575	1501.19	4.69745	2.03764e-297	3.65062e-296	up
LOC_Os07g08330	4509.05	2424.92	6593.18	1.44281	2.53058e-297	4.53048e-296	up
LOC_Os03g08460	996.191	246.325	1746.06	2.82306	2.83726e-297	5.07587e-296	up
LOC_Os03g11410	6743.09	4012.6	9473.59	1.23922	4.17802e-297	7.46908e-296	up
LOC_Os03g56250	1500.4	2422.65	578.155	-2.06623	4.88655e-297	8.72941e-296	down
LOC_Os10g38600	857.487	135.753	1579.22	3.53997	5.00365e-297	8.93215e-296	up
LOC_Os04g24600	2467.64	1097	3838.28	1.80689	5.87005e-297	1.04712e-295	up
LOC_Os04g17479	2064.7	3297.03	832.367	-1.98474	6.56262e-297	1.16982e-295	down
LOC_Os01g72205	698.083	1355.35	40.8166	-5.05725	7.17633e-297	1.2783e-295	down
LOC_Os05g01760	2168.4	3366.04	970.759	-1.79286	8.97819e-297	1.5981e-295	down
LOC_Os02g02400	1580.18	2535.23	625.137	-2.02069	2.23274e-296	3.97139e-295	down
LOC_Os12g39220	1948.35	721.842	3174.86	2.13539	2.27034e-296	4.03536e-295	up
LOC_Os12g37910	1449.62	2340.35	558.901	-2.06465	2.71696e-296	4.82572e-295	down
LOC_Os03g61780	916.632	187.759	1645.5	3.13168	3.32132e-296	5.89492e-295	up
LOC_Os04g56930	898.758	39.1637	1758.35	5.48786	4.16844e-296	7.39316e-295	up
LOC_Os07g42450	1914.8	777.961	3051.64	1.97235	4.45985e-296	7.90432e-295	up
LOC_Os02g08130	2472.24	3766.02	1178.47	-1.67583	5.33603e-296	9.45043e-295	down
LOC_Os03g58110	1947.42	666.875	3227.96	2.27445	5.63087e-296	9.96546e-295	up
LOC_Os05g06920	5088.15	10168.2	8.1191	-10.2868	8.97893e-296	1.58795e-294	down
LOC_Os06g03930	3579.18	5589.41	1568.95	-1.83467	1.22924e-295	2.1724e-294	down
LOC_Os01g50050	820.021	1460.65	179.394	-3.02199	1.42474e-295	2.51609e-294	down
LOC_Os02g57250	1974.89	3153.09	796.679	-1.98518	1.48176e-295	2.61492e-294	down
LOC_Os04g39020	2657.08	1229.41	4084.75	1.7323	2.3892e-295	4.21331e-294	up
LOC_Os10g07440	954.043	1637.01	271.077	-2.59451	2.42155e-295	4.26731e-294	down
LOC_Os07g48490	5105.81	2826.51	7385.12	1.38533	5.54184e-295	9.75901e-294	up
LOC_Os04g44700	2836.63	4234.82	1438.44	-1.5579	1.88585e-294	3.31856e-293	down
LOC_Os03g20640	793.765	1442.45	145.075	-3.31815	2.1292e-294	3.74412e-293	down
LOC_Os01g35789	2996	4528.26	1463.75	-1.63024	2.44519e-294	4.29672e-293	down
LOC_Os06g41810	826.774	1474.96	178.591	-3.04158	3.42483e-294	6.01389e-293	down
LOC_Os02g07160	666.653	1248.31	84.9999	-3.86765	6.06199e-294	1.06371e-292	down
LOC_Os11g07830	1298.69	398.96	2198.42	2.46094	1.52624e-293	2.67622e-292	up
LOC_Os02g06290	1113.7	28.4048	2199	6.26736	1.56658e-293	2.74501e-292	up
LOC_Os05g09440	715.107	1312.89	117.327	-3.48484	1.59001e-293	2.7841e-292	down
LOC_Os02g18180	867.234	176.182	1558.29	3.1474	2.03001e-293	3.55201e-292	up
LOC_Os07g05880	2637.4	1250.82	4023.99	1.68509	4.8499e-293	8.48011e-292	up
LOC_Os11g42500	2299.08	4586.47	11.6959	-8.60778	5.57116e-293	9.73437e-292	down
LOC_Os11g45280	2661.85	4022.67	1301.03	-1.62874	6.67164e-293	1.1649e-291	down
LOC_Os02g47310	1422.24	2330.05	514.439	-2.18157	6.82831e-293	1.19141e-291	down
LOC_Os02g07230	1971.93	3057.72	886.136	-1.7876	9.64047e-293	1.68089e-291	down
LOC_Os03g28170	1140.35	2261.73	18.9673	-6.89598	9.96334e-293	1.73597e-291	down
LOC_Os05g47790	2049.59	3207.54	891.648	-1.84631	1.4191e-292	2.47084e-291	down
LOC_Os07g05570	5363.96	7594.64	3133.29	-1.277	2.08977e-292	3.63599e-291	down
LOC_Os03g04130	890.997	197.817	1584.18	3.00009	2.97095e-292	5.16553e-291	up
LOC_Os04g51820	1075.22	1852.48	297.964	-2.6337	3.05518e-292	5.30824e-291	down
LOC_Os06g44610	675.165	1269.9	80.4324	-3.98404	3.46644e-292	6.01856e-291	down
LOC_Os07g07540	4849.43	9690.69	8.16951	-10.2173	1.25232e-291	2.1728e-290	down
LOC_Os02g19820	3728.42	5539.82	1917.02	-1.53155	1.27459e-291	2.20988e-290	down
LOC_Os10g38110	2725.61	5440.63	10.603	-9.01012	1.27685e-291	2.21225e-290	down
LOC_Os04g38640	851.888	1677.88	25.8944	-6.01622	1.94846e-291	3.37351e-290	down
LOC_Os06g49040	2166.82	3320.61	1013.03	-1.71243	2.72985e-291	4.72309e-290	down
LOC_Os01g63810	662.908	1275.34	50.4747	-4.65499	3.20296e-291	5.53776e-290	down
LOC_Os04g49990	1158.89	1925.38	392.394	-2.29526	9.50933e-291	1.64297e-289	down
LOC_Os02g39740	1375.68	2735.08	16.2789	-7.39261	1.46819e-290	2.53489e-289	down
LOC_Os04g09920	791.241	50.9611	1531.52	4.91109	2.56234e-290	4.42089e-289	up
LOC_Os02g30100	774.216	1398.56	149.877	-3.21402	2.78326e-290	4.79869e-289	down
LOC_Os12g08830	1961.95	3911.25	12.6445	-8.2712	2.85112e-290	4.91227e-289	down
LOC_Os02g42570	2099.89	4187.7	12.0676	-8.43992	3.94562e-290	6.79328e-289	down
LOC_Os05g49800	3912.19	5664.34	2160.05	-1.39098	6.51468e-290	1.12087e-288	down
LOC_Os11g14570	1163.93	1943.49	384.366	-2.33684	1.06229e-289	1.82643e-288	down
LOC_Os03g09880	770.513	112.837	1428.19	3.66206	1.79533e-289	3.08462e-288	up
LOC_Os04g53680	659.47	1262.25	56.6955	-4.47737	3.24313e-289	5.56827e-288	down
LOC_Os06g28524	2367.35	3724.98	1009.73	-1.88223	8.31143e-289	1.42604e-287	down
LOC_Os03g51650	5420.74	7627.07	3214.41	-1.24672	1.28879e-288	2.20971e-287	down
LOC_Os01g34060	634.647	1191.34	77.9582	-3.93658	4.79806e-288	8.22088e-287	down
LOC_Os10g36530	664.014	1227.63	100.397	-3.61563	4.85877e-288	8.31912e-287	down
LOC_Os09g28850	718.857	1303.24	134.475	-3.27696	8.07676e-288	1.38194e-286	down
LOC_Os08g44750	781.701	55.3316	1508.07	4.77015	9.66896e-288	1.65322e-286	up
LOC_Os01g59840	689.908	1342.24	37.5733	-5.16537	1.70094e-287	2.9063e-286	down
LOC_Os03g53800	12552.8	7734.02	17371.6	1.16734	1.78357e-287	3.04537e-286	up
LOC_Os03g02240	2304.55	3571.98	1037.12	-1.7829	2.35614e-287	4.02023e-286	down
LOC_Os03g51970	764.32	130.663	1397.98	3.41854	3.46671e-287	5.91111e-286	up
LOC_Os07g38730	9000.07	5482.12	12518	1.19121	4.22572e-287	7.20032e-286	up
LOC_Os07g10840	1443.34	2316.85	569.838	-2.02407	6.35747e-287	1.08252e-285	down
LOC_Os01g04280	2011.58	856.058	3167.1	1.88755	9.04329e-287	1.53879e-285	up
LOC_Os02g33149	889.837	1545.36	234.311	-2.71895	1.08154e-286	1.83907e-285	down
LOC_Os12g44320	732.319	68.0431	1396.6	4.35844	1.38888e-286	2.36004e-285	up
LOC_Os08g41040	1642.92	3271.98	13.8657	-7.88232	1.75905e-286	2.987e-285	down
LOC_Os12g38000	6066.97	3392.87	8741.07	1.36494	6.56482e-286	1.11399e-284	up
LOC_Os02g46750	1081.33	2143.68	18.9858	-6.81861	9.25749e-286	1.56984e-284	down
LOC_Os01g70740	1531.09	2461.82	600.356	-2.03807	9.74198e-286	1.65086e-284	down
LOC_Os03g63410	1850.76	804.18	2897.34	1.84896	1.20337e-285	2.03782e-284	up
LOC_Os08g13840	1289.54	434.011	2145.06	2.3039	1.25855e-285	2.1298e-284	up
LOC_Os09g24670	648.583	1212.27	84.8922	-3.84251	1.40832e-285	2.38162e-284	down
LOC_Os02g45010	859.286	193.428	1525.14	2.97965	1.61977e-285	2.73734e-284	up
LOC_Os05g45720	1215.44	2036.61	394.27	-2.36549	1.68191e-285	2.84041e-284	down
LOC_Os04g40874	4073.72	2242.3	5905.14	1.39687	3.22581e-285	5.44402e-284	up
LOC_Os06g05930	4646.15	2517.26	6775.04	1.42842	3.81082e-285	6.42692e-284	up
LOC_Os01g74010	1317.93	2143.6	492.269	-2.1218	6.25378e-285	1.05398e-283	down
LOC_Os09g34100	3410.88	5040.02	1781.74	-1.501	6.5379e-285	1.10111e-283	down
LOC_Os04g33110	2066.36	3255.89	876.827	-1.89494	6.54401e-285	1.10139e-283	down
LOC_Os04g52100	649.364	1247.46	51.2728	-4.60505	4.84588e-284	8.1503e-283	down
LOC_Os01g50622	770.708	1365.06	176.354	-2.9525	5.62727e-284	9.4581e-283	down
LOC_Os06g05860	3956.93	5794.73	2119.13	-1.45077	6.30917e-284	1.0597e-282	down
LOC_Os02g09510	2095.39	3246.31	944.479	-1.78138	3.07315e-283	5.15822e-282	down
LOC_Os01g73970	2208.44	3367.96	1048.92	-1.68187	4.07183e-283	6.82985e-282	down
LOC_Os02g41470	1268.59	2104.08	433.102	-2.27998	6.19783e-283	1.03888e-281	down
LOC_Os03g01570	911.274	1590.05	232.498	-2.77755	1.24047e-282	2.07787e-281	down
LOC_Os02g10140	744.728	80.6027	1408.85	4.1291	1.45548e-282	2.43638e-281	up
LOC_Os01g64930	1507.13	2439.31	574.946	-2.08264	1.80242e-282	3.01509e-281	down
LOC_Os10g33800	13171.5	7858.24	18484.7	1.23387	2.66463e-282	4.45438e-281	up
LOC_Os04g50060	1628.11	669.035	2587.18	1.95148	3.89626e-282	6.50887e-281	up
LOC_Os10g02260	881.656	1534.19	229.12	-2.7409	4.14108e-282	6.91317e-281	down
LOC_Os01g50860	976.57	1683.87	269.265	-2.63947	4.22943e-282	7.0559e-281	down
LOC_Os09g35880	1444.1	2368.69	519.509	-2.18693	4.69603e-282	7.82904e-281	down
LOC_Os01g55750	1090.03	1861.93	318.131	-2.54709	5.71439e-282	9.52039e-281	down
LOC_Os04g48800	2440.42	3678.58	1202.25	-1.61317	6.69413e-282	1.11452e-280	down
LOC_Os02g41890	788.504	149.6	1427.41	3.2533	6.77563e-282	1.12733e-280	up
LOC_Os10g37110	707.613	1300.62	114.611	-3.50785	9.18051e-282	1.52642e-280	down
LOC_Os09g12600	2057.28	942.33	3172.24	1.7513	1.57537e-281	2.61757e-280	up
LOC_Os02g19924	672.3	1243.06	101.544	-3.61293	1.74116e-281	2.8911e-280	down
LOC_Os09g29239	689.568	1260.15	118.99	-3.40128	2.06347e-281	3.42397e-280	down
LOC_Os06g06790	1328.37	453.993	2202.75	2.27949	2.32432e-281	3.85422e-280	up
LOC_Os02g33610	1168.69	1937.91	399.471	-2.27954	2.34299e-281	3.88258e-280	down
LOC_Os03g04340	2116.75	880.247	3353.26	1.93022	2.78212e-281	4.60717e-280	up
LOC_Os12g38360	739.462	1342.28	136.648	-3.29947	4.83209e-281	7.99656e-280	down
LOC_Os03g04260	732.095	1314.42	149.77	-3.13562	5.32106e-281	8.79985e-280	down
LOC_Os09g26880	3555.11	5169.02	1941.21	-1.41261	7.16576e-281	1.18427e-279	down
LOC_Os01g31360	1059.59	1806.78	312.402	-2.53312	1.33119e-280	2.19855e-279	down
LOC_Os03g13540	1871.73	757.331	2986.13	1.97871	1.53857e-280	2.53935e-279	up
LOC_Os05g47870	634.328	1220.58	48.0794	-4.65404	2.50207e-280	4.12683e-279	down
LOC_Os05g44300	676.022	1316.14	35.9009	-5.1973	4.78135e-280	7.88094e-279	down
LOC_Os07g36190	2727.64	4128.08	1327.2	-1.63862	6.37152e-280	1.0495e-278	down
LOC_Os10g23090	752.925	50.9621	1454.89	4.8374	1.1535e-279	1.89874e-278	up
LOC_Os03g38590	2337.93	1124.4	3551.46	1.65944	5.18225e-279	8.52468e-278	up
LOC_Os01g09560	4814.65	2712.62	6916.68	1.35062	5.36994e-279	8.82755e-278	up
LOC_Os03g16470	629.935	1212.48	47.3873	-4.67087	7.60566e-279	1.24945e-277	down
LOC_Os05g37830	948.663	247.268	1650.06	2.74037	1.04922e-278	1.7225e-277	up
LOC_Os02g42440	1083.84	334.485	1833.2	2.45402	1.20553e-278	1.9778e-277	up
LOC_Os04g53210	1703.25	623.913	2782.59	2.15642	1.21474e-278	1.9916e-277	up
LOC_Os03g05320	1051.57	1776.07	327.077	-2.44435	2.04086e-278	3.34382e-277	down
LOC_Os08g16830	613.108	1171.04	55.1797	-4.40761	2.47883e-278	4.05872e-277	down
LOC_Os05g49860	2882.47	1372.75	4392.19	1.6781	5.15004e-278	8.42685e-277	up
LOC_Os03g57545	1353.45	2180.1	526.806	-2.04778	5.92066e-278	9.68137e-277	down
LOC_Os03g28300	6087.1	3430.26	8743.93	1.35018	9.05657e-278	1.47994e-276	up
LOC_Os02g02410	7276.74	3915.3	10638.2	1.44231	2.84998e-277	4.65409e-276	up
LOC_Os07g46330	2341.3	4671.89	10.7215	-8.79001	1.1313e-276	1.84623e-275	down
LOC_Os07g42950	5168.47	2681.99	7654.94	1.51262	1.17055e-276	1.90901e-275	up
LOC_Os03g06390	1026.18	1768.22	284.139	-2.63239	1.28358e-276	2.09198e-275	down
LOC_Os03g59220	2823.83	1383.9	4263.75	1.62312	1.52594e-276	2.48534e-275	up
LOC_Os11g15624	5887.29	8694.56	3080.02	-1.49786	1.77096e-276	2.8825e-275	down
LOC_Os03g02640	629.015	1172.73	85.3039	-3.78097	2.18029e-276	3.54641e-275	down
LOC_Os06g02120	772.678	1370.91	174.443	-2.97735	2.71558e-276	4.41421e-275	down
LOC_Os03g53640	652.981	1266.89	39.0689	-5.02507	3.92529e-276	6.37641e-275	down
LOC_Os10g40934	775.364	1377.58	173.149	-2.98726	4.33634e-276	7.0395e-275	down
novel.587	2224.22	3439.49	1008.94	-1.76937	4.48917e-276	7.28283e-275	down
LOC_Os09g33470	1760.96	3509.7	12.2119	-8.14965	4.81926e-276	7.81321e-275	down
LOC_Os07g12510	1462.04	2385.01	539.063	-2.14299	9.61482e-276	1.55778e-274	down
LOC_Os07g04160	660.445	1280.03	40.861	-4.96481	1.25455e-275	2.03128e-274	down
LOC_Os07g10540	1393.56	2236.67	550.449	-2.02112	1.5052e-275	2.43551e-274	down
LOC_Os10g11310	666.326	1271.39	61.2633	-4.38296	2.13457e-275	3.45162e-274	down
LOC_Os01g02400	643.115	1185.88	100.354	-3.566	4.19461e-275	6.77826e-274	down
LOC_Os11g26160	738.622	1308.26	168.989	-2.95373	8.23529e-275	1.32991e-273	down
LOC_Os01g70770	697.665	1310.57	84.757	-3.95176	1.44771e-274	2.33637e-273	down
LOC_Os11g16580	945.539	1641.5	249.579	-2.71822	1.60033e-274	2.58099e-273	down
LOC_Os01g70850	801.494	142.045	1460.94	3.36126	1.94571e-274	3.13597e-273	up
LOC_Os03g13810	3049.36	4483.05	1615.67	-1.47225	2.58925e-274	4.17046e-273	down
LOC_Os01g04900	819.778	1615.69	23.8626	-6.08389	3.18531e-274	5.12719e-273	down
LOC_Os12g37650	3077.96	6146.85	9.07743	-9.40856	4.44755e-274	7.15427e-273	down
LOC_Os04g59440	642.604	1244.29	40.9165	-4.93333	5.14793e-274	8.27552e-273	down
LOC_Os01g32730	638.359	1234.52	42.1936	-4.87003	5.15733e-274	8.28523e-273	down
LOC_Os04g47120	1250.18	2047.39	452.974	-2.17725	1.09394e-273	1.75627e-272	down
LOC_Os09g32250	1250.29	446.062	2054.51	2.20329	1.17247e-273	1.88112e-272	up
LOC_Os03g08220	1517.36	2428.1	606.609	-1.99972	1.18945e-273	1.90714e-272	down
LOC_Os01g49190	10226.9	6481.02	13972.7	1.10835	5.63788e-273	9.03376e-272	up
LOC_Os01g70950	1116.83	1845.51	388.141	-2.25104	7.52597e-273	1.20513e-271	down
LOC_Os03g19720	1436.27	2294.89	577.654	-1.9903	9.36536e-273	1.4987e-271	down
LOC_Os09g32976	4199.61	2207.87	6191.34	1.48713	1.08002e-272	1.72719e-271	up
LOC_Os04g50700	847.956	190.51	1505.4	2.98094	1.1557e-272	1.84703e-271	up
LOC_Os06g36700	3791.27	2084.01	5498.52	1.39994	1.21378e-272	1.9386e-271	up
LOC_Os08g44830	840.859	34.8047	1646.91	5.56454	1.41399e-272	2.25691e-271	up
LOC_Os05g48790	761.614	1349.2	174.027	-2.9497	1.80309e-272	2.8761e-271	down
LOC_Os05g03000	1329.62	2180.92	478.324	-2.18844	2.1854e-272	3.48367e-271	down
LOC_Os08g06100	29837.3	18309.1	41365.6	1.17586	2.22289e-272	3.54115e-271	up
LOC_Os03g17760	888.167	213.22	1563.11	2.87501	3.0602e-272	4.87189e-271	up
novel.684	2556.35	4817.73	294.974	-4.03037	3.87004e-272	6.15719e-271	down
LOC_Os01g11620	1140.67	1906.07	375.262	-2.34533	4.05401e-272	6.44575e-271	down
LOC_Os04g35180	1083.76	1810.13	357.391	-2.34151	4.68937e-272	7.45116e-271	down
LOC_Os01g53000	1550.81	2463.61	638.018	-1.94982	5.0465e-272	8.01346e-271	down
LOC_Os01g61010	639.286	1236.58	41.9903	-4.86456	5.21148e-272	8.27012e-271	down
LOC_Os12g03270	840.337	171.758	1508.92	3.13756	5.60197e-272	8.8841e-271	up
LOC_Os12g10740	4888.4	2828.53	6948.28	1.2969	1.11406e-271	1.76565e-270	up
LOC_Os01g65880	2003.45	3138.02	868.886	-1.85263	1.38329e-271	2.19094e-270	down
LOC_Os06g30030	725.844	108.943	1342.75	3.62477	1.50547e-271	2.38292e-270	up
novel.78	635.699	1233.05	38.3479	-4.99863	4.04869e-271	6.40434e-270	down
LOC_Os11g04720	990.557	1660.94	320.176	-2.37413	4.19082e-271	6.62492e-270	down
LOC_Os09g34960	1430.07	555.384	2304.76	2.0531	5.49889e-271	8.68719e-270	up
LOC_Os02g55420	3776.55	5577.51	1975.6	-1.49832	1.01431e-270	1.60139e-269	down
LOC_Os03g51030	3281.1	1748.45	4813.76	1.46136	1.30243e-270	2.05496e-269	up
LOC_Os02g10700	8312.51	12125.9	4499.11	-1.43039	1.33057e-270	2.09803e-269	down
LOC_Os08g09350	2338.74	959.645	3717.84	1.95412	6.4737e-270	1.02011e-268	up
LOC_Os04g57550	2979.49	4379.01	1579.97	-1.47077	1.21069e-269	1.90656e-268	down
LOC_Os08g05650	1048.08	1785.25	310.903	-2.52231	1.47177e-269	2.31624e-268	down
LOC_Os10g31330	594.903	1133.15	56.6561	-4.30829	2.15839e-269	3.39466e-268	down
LOC_Os02g17390	5713.75	3420.87	8006.64	1.22702	2.33357e-269	3.66784e-268	up
LOC_Os12g21700	2906.78	4280.33	1533.23	-1.48044	2.37429e-269	3.72947e-268	down
LOC_Os04g35300	3840.62	1821.04	5860.21	1.68549	2.76472e-269	4.34e-268	up
LOC_Os03g11890	2250.42	3386.73	1114.1	-1.60389	4.14457e-269	6.50192e-268	down
LOC_Os11g34870	673.961	1312.38	35.539	-5.20565	5.47558e-269	8.58455e-268	down
LOC_Os09g32510	2324.82	3543.47	1106.18	-1.67813	8.58321e-269	1.34481e-267	down
LOC_Os07g25430	6995.68	13984.9	6.42089	-11.1091	2.353e-268	3.68432e-267	down
LOC_Os01g68700	3848.34	5536.3	2160.37	-1.35709	2.74241e-268	4.29135e-267	down
LOC_Os01g58910	1139.32	377.228	1901.42	2.3323	3.06569e-268	4.79419e-267	up
LOC_Os02g56320	716.243	1283.54	148.951	-3.10496	3.98625e-268	6.22984e-267	down
LOC_Os03g31150	717.051	1406.64	27.4677	-5.67978	7.18834e-268	1.12271e-266	down
LOC_Os02g07490	1723.77	736.427	2711.12	1.88052	1.02519e-267	1.60018e-266	up
LOC_Os04g45600	1282.91	2551.28	14.5409	-7.46186	2.02865e-267	3.16445e-266	down
LOC_Os02g09750	908.639	1564.33	252.951	-2.62538	2.8765e-267	4.48415e-266	down
LOC_Os01g11590	858.726	1497.67	219.779	-2.77148	2.91138e-267	4.53567e-266	down
LOC_Os10g38710	3346.3	6684.22	8.3837	-9.62923	3.06401e-267	4.77044e-266	down
LOC_Os09g39500	2025.82	901.58	3150.07	1.80455	3.26098e-267	5.07392e-266	up
LOC_Os02g03270	965.106	27.1498	1903.06	6.13428	3.5302e-267	5.48934e-266	up
LOC_Os02g47150	1670.85	714.428	2627.27	1.87943	3.95739e-267	6.14974e-266	up
LOC_Os01g25920	2854.93	4385.51	1324.35	-1.72857	4.42519e-267	6.87239e-266	down
LOC_Os01g07420	1293.96	402.994	2184.93	2.43805	5.82828e-267	9.04572e-266	up
LOC_Os08g37940	2652.49	5295.56	9.41987	-9.14601	8.84847e-267	1.37246e-265	down
LOC_Os02g56200	1538.35	2431.31	645.396	-1.91262	9.36555e-267	1.45175e-265	down
LOC_Os07g07860	1176.83	21.9261	2331.73	6.72937	1.06817e-266	1.65473e-265	up
LOC_Os03g37864	1647.2	2604.31	690.084	-1.91531	2.26977e-266	3.51395e-265	down
LOC_Os06g12120	844.492	1453.21	235.777	-2.62136	2.36315e-266	3.65622e-265	down
LOC_Os03g63310	741.483	1457.47	25.4918	-5.83014	3.42946e-266	5.30269e-265	down
LOC_Os06g48720	699.78	98.2153	1301.34	3.72933	3.48068e-266	5.37852e-265	up
LOC_Os11g09864	590.328	1112.42	68.2323	-4.02326	7.312e-266	1.12918e-264	down
LOC_Os08g39630	4990.83	7407.48	2574.17	-1.52459	9.17148e-266	1.41545e-264	down
LOC_Os12g36830	1080.77	329.067	1832.47	2.47827	2.08683e-265	3.21865e-264	up
LOC_Os04g25560	1193.12	1973.65	412.59	-2.25968	2.12135e-265	3.26984e-264	down
LOC_Os02g12790	591.234	1129.84	52.6265	-4.43537	2.32039e-265	3.57441e-264	down
LOC_Os02g51410	2000.96	3050.33	951.589	-1.68156	2.38076e-265	3.66512e-264	down
novel.642	627.847	1153.89	101.808	-3.50826	2.61861e-265	4.02879e-264	down
LOC_Os04g51610	1769.55	2743.07	796.033	-1.78401	3.49984e-265	5.38123e-264	down
LOC_Os09g24530	1020.99	2024.57	17.4159	-6.87985	3.55092e-265	5.45637e-264	down
LOC_Os08g29780	870.563	1490.06	251.071	-2.57005	3.95655e-265	6.07589e-264	down
LOC_Os10g40614	808.643	40.4975	1576.79	5.27847	4.48575e-265	6.88428e-264	up
LOC_Os06g44160	603.8	1136.2	71.3977	-3.98648	4.61193e-265	7.07353e-264	down
LOC_Os05g31000	2833.76	1325.66	4341.86	1.71146	7.02378e-265	1.0766e-263	up
LOC_Os05g05480	806.684	1406.34	207.028	-2.76056	9.05664e-265	1.38734e-263	down
LOC_Os06g46799	2198.14	963.17	3433.1	1.83383	1.06225e-264	1.6262e-263	up
LOC_Os04g56110	1106.69	1831.07	382.313	-2.2622	1.10413e-264	1.68927e-263	down
LOC_Os07g12900	782.618	37.1085	1528.13	5.36887	1.33691e-264	2.04414e-263	up
LOC_Os07g45320	3072.56	1548.73	4596.4	1.56925	1.34835e-264	2.06036e-263	up
LOC_Os08g02070	1518.81	620.005	2417.61	1.96315	1.69132e-264	2.58284e-263	up
LOC_Os07g47300	579.472	1105.8	53.1433	-4.3882	2.0861e-264	3.18374e-263	down
LOC_Os03g55720	4635.24	9263.26	7.21118	-10.3224	2.23097e-264	3.40274e-263	down
LOC_Os12g38400	796.774	1404.67	188.875	-2.89274	3.09936e-264	4.72432e-263	down
LOC_Os01g42280	580.926	1109.91	51.9407	-4.42698	3.40509e-264	5.18715e-263	down
LOC_Os09g29200	2685.63	4158.72	1212.54	-1.77595	3.41644e-264	5.20123e-263	down
LOC_Os01g17190	4607.22	2451.78	6762.66	1.46322	4.65604e-264	7.08406e-263	up
LOC_Os01g53680	1411.45	509.978	2312.92	2.17941	5.12909e-264	7.799e-263	up
LOC_Os03g45730	1162.14	1895.34	428.938	-2.14287	8.10204e-264	1.23119e-262	down
LOC_Os01g16124	1191.64	1950.99	432.294	-2.17154	5.80772e-263	8.82003e-262	down
LOC_Os12g20150	2504.86	3838.07	1171.65	-1.71052	1.67743e-262	2.5459e-261	down
LOC_Os12g37419	2961.41	1382.73	4540.1	1.71495	1.93399e-262	2.9335e-261	up
LOC_Os06g13680	8431.93	4021.5	12842.4	1.67494	2.28782e-262	3.46807e-261	up
LOC_Os05g06990	1052.49	337.152	1767.83	2.3908	2.5741e-262	3.89963e-261	up
LOC_Os01g32830	3655.53	7303.2	7.86599	-9.86366	5.09167e-262	7.70891e-261	down
LOC_Os06g29180	5635.37	3415.95	7854.79	1.20149	8.24333e-262	1.24729e-260	up
LOC_Os03g17470	1328.71	2140.61	516.811	-2.04912	1.03175e-261	1.56018e-260	down
LOC_Os10g37180	14056.8	28108.7	4.9068	-12.5085	1.36498e-261	2.06283e-260	down
LOC_Os01g05064	961.26	262.942	1659.58	2.65694	1.47718e-261	2.23102e-260	up
LOC_Os10g35630	1293.39	2093.8	492.973	-2.0883	2.0784e-261	3.13714e-260	down
LOC_Os09g09320	696.241	1365.84	26.6449	-5.67022	2.12465e-261	3.20499e-260	down
LOC_Os02g45000	1297.18	2115.29	479.07	-2.1423	2.97577e-261	4.48615e-260	down
LOC_Os04g43030	696.094	1234.88	157.309	-2.97211	3.25877e-261	4.9098e-260	down
LOC_Os04g23820	1063.58	1820.58	306.589	-2.57107	3.89096e-261	5.85872e-260	down
LOC_Os08g01220	2285.35	3422.97	1147.73	-1.57664	4.18161e-261	6.29252e-260	down
LOC_Os05g39240	1184.42	429.587	1939.24	2.17441	4.26562e-261	6.41504e-260	up
LOC_Os10g41930	1876.83	2901.85	851.82	-1.7689	4.9861e-261	7.494e-260	down
LOC_Os08g12780	590.465	1116.87	64.0587	-4.13209	1.03292e-260	1.55151e-259	down
LOC_Os05g41540	1947.52	867.562	3027.49	1.80293	1.08626e-260	1.63064e-259	up
LOC_Os12g08130	925.349	1599.67	251.025	-2.67039	1.4429e-260	2.16471e-259	down
LOC_Os03g21960	824.506	32.032	1616.98	5.64982	1.96006e-260	2.93878e-259	up
LOC_Os10g35070	605.047	1122.15	87.9428	-3.67275	3.17779e-260	4.76168e-259	down
LOC_Os06g04480	609.499	1159.7	59.2971	-4.29381	3.20138e-260	4.79412e-259	down
LOC_Os02g50350	3385.18	1715.72	5054.64	1.55792	3.22305e-260	4.82365e-259	up
LOC_Os08g04460	1422.55	561.207	2283.9	2.02423	5.1854e-260	7.75583e-259	up
LOC_Os07g04930	4409.08	6429	2389.16	-1.42876	5.84896e-260	8.74303e-259	down
LOC_Os03g49940	912.897	1542.58	283.213	-2.44476	6.48155e-260	9.68278e-259	down
LOC_Os10g40520	1213.03	413.568	2012.49	2.28197	7.67847e-260	1.14639e-258	up
LOC_Os09g23140	907.181	247.132	1567.23	2.66628	1.09698e-259	1.6368e-258	up
LOC_Os06g06170	749.361	1325.94	172.778	-2.94753	1.75293e-259	2.61396e-258	down
LOC_Os09g24320	943.274	1627.27	259.279	-2.64793	1.80032e-259	2.683e-258	down
LOC_Os03g62200	840.04	177.149	1502.93	3.08534	2.0447e-259	3.04536e-258	up
LOC_Os04g58960	908.457	246.137	1570.78	2.67215	3.83989e-259	5.71567e-258	up
novel.872	1095.65	22.2944	2169.01	6.60213	4.71165e-259	7.00907e-258	up
LOC_Os01g42380	1184.92	1920.29	449.545	-2.09379	9.17632e-259	1.36425e-257	down
LOC_Os01g59090	738.882	1454.08	23.6784	-5.94991	1.34203e-258	1.99402e-257	down
LOC_Os07g48390	878.492	226.756	1530.23	2.75524	2.00422e-258	2.97612e-257	up
LOC_Os09g20820	865.363	226.833	1503.89	2.72975	3.06101e-258	4.54265e-257	up
LOC_Os02g45520	1159.82	2304.81	14.8338	-7.28565	4.51422e-258	6.69523e-257	down
LOC_Os01g72140	4203.08	9.48409	8396.67	9.78452	5.02464e-258	7.44779e-257	up
LOC_Os07g41200	3833.86	5491.96	2175.76	-1.33625	6.93827e-258	1.02781e-256	down
LOC_Os12g42400	685.679	118.395	1252.96	3.4045	1.19262e-257	1.76565e-256	up
LOC_Os06g04530	1907.22	2900.92	913.527	-1.66724	1.29133e-257	1.91065e-256	down
LOC_Os09g37710	2876.99	1457.75	4296.22	1.56012	1.36216e-257	2.01423e-256	up
LOC_Os12g35465	772.706	1340.64	204.767	-2.70957	1.70749e-257	2.52337e-256	down
LOC_Os07g29220	862.912	1483.79	242.035	-2.61462	2.0112e-257	2.97042e-256	down
LOC_Os03g17120	1482.4	599.724	2365.07	1.97937	2.10015e-257	3.09994e-256	up
LOC_Os12g08090	710.347	1259.94	160.753	-2.97118	2.96234e-257	4.36998e-256	down
LOC_Os06g01966	675.456	1323.99	26.9254	-5.60926	3.23142e-257	4.76408e-256	down
LOC_Os03g37490	675.312	1204.89	145.739	-3.05073	4.38412e-257	6.45965e-256	down
LOC_Os01g16530	1001.82	1687.8	315.849	-2.41689	1.52281e-256	2.24241e-255	down
LOC_Os12g36850	697.033	80.4898	1313.58	4.02791	1.60286e-256	2.35888e-255	up
LOC_Os11g34210	1158.86	1921.12	396.593	-2.2757	2.33448e-256	3.43354e-255	down
LOC_Os11g31590	925.116	265.481	1584.75	2.57764	4.74551e-256	6.9755e-255	up
LOC_Os09g19720	887.053	221.628	1552.48	2.80545	6.71058e-256	9.85814e-255	up
LOC_Os03g02830	577.038	1102.13	51.9462	-4.40914	1.18092e-255	1.73379e-254	down
LOC_Os06g02220	2204.5	983.159	3425.85	1.8014	1.89823e-255	2.78527e-254	up
LOC_Os08g03600	687.475	122.075	1252.87	3.36014	2.14944e-255	3.152e-254	up
LOC_Os10g42960	4705.2	2651.08	6759.32	1.35036	2.15097e-255	3.15238e-254	up
LOC_Os10g14920	1052.87	1745.75	359.991	-2.27568	2.17489e-255	3.18554e-254	down
LOC_Os09g28910	1821.69	2830.07	813.315	-1.8005	2.92811e-255	4.28623e-254	down
LOC_Os02g54600	1477.89	2314.55	641.238	-1.85169	5.02276e-255	7.34809e-254	down
LOC_Os07g39470	2598.11	3909.12	1287.1	-1.60342	5.89015e-255	8.61195e-254	down
LOC_Os04g39560	3183.78	4729.18	1638.37	-1.52858	9.47918e-255	1.38513e-253	down
LOC_Os08g01950	671.982	46.1778	1297.79	4.81387	1.12218e-254	1.63879e-253	up
LOC_Os04g57540	1238.11	2014.86	461.36	-2.12615	1.14822e-254	1.67584e-253	down
LOC_Os05g43760	586.736	1102.14	71.3298	-3.93756	1.42648e-254	2.08073e-253	down
LOC_Os03g09970	649.691	53.1567	1246.23	4.55254	2.1317e-254	3.10756e-253	up
LOC_Os04g38570	875.066	232.138	1517.99	2.71102	2.1615e-254	3.14915e-253	up
LOC_Os06g36560	2592.75	1260.87	3924.64	1.63861	7.38897e-254	1.07588e-252	up
LOC_Os01g68790	1545.45	588.13	2502.76	2.08916	8.30382e-254	1.20838e-252	up
LOC_Os02g34860	743.957	1465.37	22.5415	-6.01826	9.39543e-254	1.36643e-252	down
LOC_Os02g44080	3129.67	10.6213	6248.72	9.20043	1.95913e-253	2.8476e-252	up
LOC_Os06g14324	4373.98	8740.98	6.98725	-10.2998	2.72446e-253	3.95768e-252	down
LOC_Os10g08580	1188.88	1922.73	455.03	-2.07967	7.6524e-253	1.11097e-251	down
LOC_Os06g02510	2411.26	1188.72	3633.79	1.61134	7.75372e-253	1.12502e-251	up
novel.697	1538.43	651.849	2425.01	1.89619	8.19329e-253	1.1881e-251	up
LOC_Os03g01270	1102.67	354.406	1850.93	2.38456	8.86352e-253	1.28454e-251	up
LOC_Os09g10274	1751.47	782.129	2720.81	1.79887	8.97548e-253	1.3e-251	up
LOC_Os02g49440	829.2	1425.91	232.493	-2.61566	1.06541e-252	1.54222e-251	down
LOC_Os05g28510	1330.67	529.353	2131.99	2.00972	1.06759e-252	1.54447e-251	up
LOC_Os01g03690	622.871	1124.63	121.111	-3.21692	1.22365e-252	1.76921e-251	down
LOC_Os07g34580	757.325	170.723	1343.93	2.97722	1.69306e-252	2.44647e-251	up
LOC_Os04g44910	1120.66	380.978	1860.35	2.2864	1.84223e-252	2.66047e-251	up
LOC_Os02g01440	858.655	1477.99	239.322	-2.63247	4.56551e-252	6.58948e-251	down
LOC_Os08g32170	1072.37	351.176	1793.57	2.3512	5.53568e-252	7.98508e-251	up
LOC_Os05g27320	1043.19	335.696	1750.68	2.38085	7.54922e-252	1.08832e-250	up
LOC_Os02g39850	7399.07	4535.05	10263.1	1.17829	8.82961e-252	1.27216e-250	up
LOC_Os11g40600	1290.93	2568.83	13.0365	-7.63049	1.14304e-251	1.64592e-250	down
LOC_Os10g30850	654.123	81.218	1227.03	3.91619	1.60404e-251	2.30839e-250	up
novel.505	13521	8434.86	18607.2	1.14132	1.67959e-251	2.41571e-250	up
LOC_Os03g14280	1411.17	2267.51	554.832	-2.03186	2.28478e-251	3.28423e-250	down
LOC_Os01g37000	6473.46	7.62642	12939.3	10.7166	2.93702e-251	4.21935e-250	up
LOC_Os01g55940	654.743	90.9242	1218.56	3.74043	3.65917e-251	5.25374e-250	up
LOC_Os03g31290	1766.01	2700.13	831.878	-1.6987	3.82718e-251	5.49177e-250	down
LOC_Os07g07990	3020.75	1591.3	4450.19	1.48383	6.33372e-251	9.08324e-250	up
LOC_Os03g50080	2581.49	5154.16	8.82432	-9.20328	7.21105e-251	1.03354e-249	down
LOC_Os10g40430	2230.23	12.3537	4448.1	8.48088	9.44398e-251	1.3528e-249	up
LOC_Os06g30380	920.294	1566.2	274.387	-2.51617	1.00592e-250	1.4401e-249	down
LOC_Os11g11210	643.972	1258.76	29.1817	-5.44158	1.27238e-250	1.82051e-249	down
LOC_Os12g03070	1191.94	2370.08	13.8056	-7.41749	1.33377e-250	1.90723e-249	down
LOC_Os03g21030	2098.8	962.063	3235.54	1.74924	4.3146e-250	6.16614e-249	up
LOC_Os09g26420	21761.2	29803.9	13718.4	-1.11932	5.40162e-250	7.71517e-249	down
LOC_Os02g40100	1003.78	1659.78	347.79	-2.25275	7.39022e-250	1.05494e-248	down
LOC_Os07g37560	5294.7	7500.99	3088.41	-1.27978	7.88317e-250	1.12466e-248	down
LOC_Os08g36040	621.419	74.3984	1168.44	3.97432	1.08266e-249	1.54369e-248	up
LOC_Os08g16050	647.859	84.0269	1211.69	3.84722	1.21834e-249	1.73615e-248	up
LOC_Os09g12230	890.23	246.25	1534.21	2.63776	1.22559e-249	1.74548e-248	up
LOC_Os02g02910	1095.12	1781.52	408.726	-2.12505	1.32277e-249	1.88279e-248	down
LOC_Os08g14000	547.84	1047.89	47.7853	-4.45907	1.3399e-249	1.90607e-248	down
LOC_Os03g13010	1603.29	2523.12	683.452	-1.8837	3.62636e-249	5.15573e-248	down
LOC_Os08g01150	744.722	1291.2	198.246	-2.701	3.97941e-249	5.65442e-248	down
LOC_Os09g31390	1133.59	19.646	2247.54	6.82913	4.72659e-249	6.71224e-248	up
LOC_Os08g16580	543.953	1018.55	69.3569	-3.8767	5.34603e-249	7.58756e-248	down
LOC_Os06g12410	630.487	68.6451	1192.33	4.11447	9.66333e-249	1.37072e-247	up
LOC_Os01g67220	3576.16	1990.45	5161.87	1.37517	9.95385e-249	1.41112e-247	up
LOC_Os03g05640	1171.8	18.9094	2324.7	6.93182	1.03786e-248	1.47049e-247	up
LOC_Os04g31010	665.476	1183.81	147.142	-3.01066	1.96623e-248	2.78426e-247	down
LOC_Os02g07350	1016.89	1700.99	332.784	-2.35829	1.98058e-248	2.80296e-247	down
LOC_Os12g41230	1195.13	453.761	1936.5	2.09339	2.49595e-248	3.53031e-247	up
LOC_Os02g48640	2057.47	873.074	3241.86	1.89243	4.12127e-248	5.82586e-247	up
LOC_Os01g41810	616.128	1200.43	31.8276	-5.24383	5.28673e-248	7.46909e-247	down
LOC_Os03g17634	628.007	1142.45	113.561	-3.32917	6.92491e-248	9.77793e-247	down
LOC_Os12g10330	623.304	65.7678	1180.84	4.16319	7.21307e-248	1.0179e-246	up
LOC_Os11g26850	23350.1	14526.7	32173.5	1.1471	9.463e-248	1.33464e-246	up
LOC_Os07g30800	636.528	1137.59	135.462	-3.07074	1.06556e-247	1.50199e-246	down
LOC_Os12g26940	826.265	220.065	1432.46	2.70253	1.44051e-247	2.02935e-246	up
LOC_Os07g32020	1112.68	2210.89	14.4719	-7.25558	1.70434e-247	2.39966e-246	down
LOC_Os01g01520	770.364	187.813	1352.92	2.84874	1.86791e-247	2.62847e-246	up
LOC_Os07g29240	555.922	1060.62	51.2261	-4.36348	2.35651e-247	3.31413e-246	down
LOC_Os08g38300	2377.36	1196.43	3558.28	1.57277	2.43652e-247	3.4247e-246	up
LOC_Os03g52040	565.211	1091.42	39.007	-4.81009	3.38644e-247	4.75718e-246	down
LOC_Os03g18570	3509.1	1877.83	5140.37	1.45252	5.54765e-247	7.78876e-246	up
LOC_Os03g29980	1736.54	2688.71	784.363	-1.77634	9.14426e-247	1.2831e-245	down
LOC_Os07g09970	953.722	1592.44	315.006	-2.33778	1.06054e-246	1.48728e-245	down
LOC_Os02g17650	1144.85	1855.63	434.076	-2.0953	1.51356e-246	2.12139e-245	down
LOC_Os01g52110	4099.29	5879.95	2318.63	-1.34194	1.56249e-246	2.18873e-245	down
LOC_Os03g12910	3147.01	4615.59	1678.43	-1.45847	1.61016e-246	2.25422e-245	down
LOC_Os02g01560	8455.91	4973.78	11938	1.26316	2.86867e-246	4.01387e-245	up
LOC_Os08g44340	4602.78	2682.7	6522.86	1.28185	3.07014e-246	4.29333e-245	up
LOC_Os03g18630	642.71	99.2881	1186.13	3.57922	4.89178e-246	6.83688e-245	up
LOC_Os03g45710	578.034	1120.74	35.3249	-4.98924	5.00337e-246	6.98888e-245	down
LOC_Os11g06750	5555.7	3075.43	8035.98	1.38557	5.31184e-246	7.41558e-245	up
LOC_Os03g07530	6817.12	9975.2	3659.04	-1.44718	5.72052e-246	7.98161e-245	down
LOC_Os04g50990	1894.8	831.926	2957.68	1.82936	5.9986e-246	8.36489e-245	up
LOC_Os01g64730	1948.06	2985.02	911.107	-1.71125	6.32639e-246	8.817e-245	down
LOC_Os07g07715	557.03	1034.45	79.6077	-3.70039	6.49256e-246	9.0435e-245	down
LOC_Os04g52370	4390.03	2343.21	6436.86	1.45776	9.02694e-246	1.25666e-244	up
LOC_Os10g32300	555.375	1050.36	60.3946	-4.11634	1.01011e-245	1.40539e-244	down
LOC_Os08g39140	2855.1	1517.4	4192.79	1.46619	1.01784e-245	1.41536e-244	up
LOC_Os01g71190	1799.71	3589.07	10.349	-8.45167	1.87087e-245	2.60008e-244	down
LOC_Os03g12500	561.965	1038.35	85.5834	-3.60456	2.18781e-245	3.03885e-244	down
LOC_Os07g01550	2322.35	3513.32	1131.37	-1.63401	5.37763e-245	7.46527e-244	down
LOC_Os02g43340	674.852	1187.6	162.1	-2.87443	6.66148e-245	9.24233e-244	down
LOC_Os01g40640	1331.58	2153.7	509.461	-2.0817	9.11236e-245	1.26357e-243	down
LOC_Os02g54160	4849.94	2925.02	6774.86	1.21184	1.43833e-244	1.99334e-243	up
LOC_Os01g28680	6251.8	8914.83	3588.78	-1.31231	1.76946e-244	2.45088e-243	down
LOC_Os01g67390	616.159	79.9202	1152.4	3.85125	2.06538e-244	2.85916e-243	up
LOC_Os02g04710	3959.89	5609.66	2310.13	-1.28036	2.70586e-244	3.74368e-243	down
LOC_Os07g23520	1031.18	1685.83	376.522	-2.16254	3.97842e-244	5.50126e-243	down
LOC_Os05g43860	690.846	1223.55	158.142	-2.95295	4.28763e-244	5.92551e-243	down
LOC_Os01g67500	1214.46	468.386	1960.53	2.06545	4.56797e-244	6.30941e-243	up
LOC_Os12g13460	1440.46	2310.16	570.765	-2.0206	4.64121e-244	6.40699e-243	down
LOC_Os02g01332	2197.91	922.723	3473.1	1.91248	7.10682e-244	9.8052e-243	up
LOC_Os03g12030	2415.3	3764.94	1065.67	-1.81974	1.27776e-243	1.76192e-242	down
LOC_Os11g02440	2740.14	4039.11	1441.17	-1.48618	2.16999e-243	2.99057e-242	down
LOC_Os09g38777	594.242	1080.86	107.623	-3.33462	2.54067e-243	3.49947e-242	down
LOC_Os12g07010	5729.74	3226.16	8233.33	1.35166	3.68229e-243	5.0691e-242	up
LOC_Os05g50280	1716.68	2649.89	783.465	-1.75789	6.96944e-243	9.58889e-242	down
LOC_Os01g64310	585.161	1138.22	32.1023	-5.12963	9.86967e-243	1.35716e-241	down
LOC_Os06g08910	708.51	1233.95	183.073	-2.75155	1.06362e-242	1.46176e-241	down
LOC_Os06g40500	698.992	1239.35	158.638	-2.96466	1.19577e-242	1.64246e-241	down
LOC_Os12g29520	2162.9	3285.14	1040.67	-1.65703	1.55568e-242	2.13563e-241	down
LOC_Os06g47700	704.672	34.3368	1375.01	5.32011	2.05743e-242	2.82286e-241	up
LOC_Os12g42884	16251.2	10564.8	21937.5	1.0541	2.169e-242	2.97428e-241	up
LOC_Os12g38760	685.83	126.696	1244.96	3.30005	7.07464e-242	9.69587e-241	up
LOC_Os09g35800	685.582	1220.3	150.859	-3.01103	1.53545e-241	2.10319e-240	down
LOC_Os03g61960	2040.44	982.34	3098.55	1.6573	2.35611e-241	3.22549e-240	up
LOC_Os02g22190	2816.74	1441.15	4192.33	1.54035	5.56881e-241	7.61944e-240	up
LOC_Os03g41510	1549.76	3088.8	10.7181	-8.15285	5.78354e-241	7.90886e-240	down
LOC_Os02g13660	543.08	1041.91	44.2537	-4.55501	7.677e-241	1.04923e-239	down
LOC_Os02g35000	624.415	87.6255	1161.21	3.72997	8.53039e-241	1.16522e-239	up
LOC_Os01g22600	1312.56	2088.07	537.052	-1.95708	8.63807e-241	1.17928e-239	down
LOC_Os03g29190	1724.38	783.246	2665.51	1.76596	8.96378e-241	1.22307e-239	up
LOC_Os05g36280	1332.18	518.858	2145.49	2.04714	9.19328e-241	1.25369e-239	up
LOC_Os01g50940	551.198	1066.19	36.2096	-4.8922	1.57331e-240	2.14435e-239	down
LOC_Os05g47770	732.336	166.4	1298.27	2.96291	1.82146e-240	2.48121e-239	up
LOC_Os01g71620	2241.77	3360.47	1123.08	-1.58005	1.95743e-240	2.66495e-239	down
LOC_Os03g37640	2369.13	3513.84	1224.43	-1.52114	2.01021e-240	2.73531e-239	down
LOC_Os11g09020	535.026	1028.99	41.0609	-4.64893	3.43146e-240	4.6655e-239	down
LOC_Os01g66850	1318.57	2625.63	11.5164	-7.80336	3.43251e-240	4.6655e-239	down
LOC_Os07g48760	610.103	51.1748	1169.03	4.51111	4.00564e-240	5.44151e-239	up
LOC_Os02g21660	2876.37	1363.57	4389.16	1.68698	4.58252e-240	6.22176e-239	up
LOC_Os07g38830	591.345	1154.22	28.4658	-5.34769	5.28254e-240	7.16825e-239	down
LOC_Os04g58570	1410.25	579.842	2240.65	1.94958	6.72686e-240	9.12314e-239	up
LOC_Os09g37910	7229.7	10365.2	4094.2	-1.33991	7.73718e-240	1.04876e-238	down
LOC_Os06g44270	1590.05	682.187	2497.91	1.87213	9.45512e-240	1.28092e-238	up
LOC_Os01g22510	1401.35	2190.88	611.82	-1.84002	1.59576e-239	2.16065e-238	down
LOC_Os06g27760	1822.95	3636.2	9.69333	-8.55818	2.77088e-239	3.74971e-238	down
LOC_Os09g27820	530.48	1011.27	49.6913	-4.35369	3.46807e-239	4.69062e-238	down
LOC_Os02g29960	678.318	1334.65	21.9857	-5.92251	1.26672e-238	1.71233e-237	down
LOC_Os08g37300	1672	703.511	2640.49	1.90825	1.46926e-238	1.98503e-237	up
LOC_Os03g52680	3867.31	5769.51	1965.11	-1.55319	1.54873e-238	2.09125e-237	down
LOC_Os07g37420	711.913	1403.48	20.3513	-6.0977	2.21117e-238	2.98248e-237	down
LOC_Os06g51084	3118.38	4484.83	1751.93	-1.35542	2.49139e-238	3.35862e-237	down
LOC_Os08g04830	1109.95	1796.65	423.256	-2.0867	8.44987e-238	1.1385e-236	down
LOC_Os09g32030	558.871	1025.2	92.544	-3.47678	1.26955e-237	1.70961e-236	down
LOC_Os01g51210	1015.51	312.834	1718.18	2.4559	2.06967e-237	2.78555e-236	up
LOC_Os01g22490	4422.24	2501.69	6342.78	1.34201	2.27895e-237	3.06555e-236	up
LOC_Os02g03740	861.953	1444.44	279.464	-2.36766	5.31586e-237	7.14678e-236	down
LOC_Os01g01484	1234.46	2002.51	466.423	-2.10293	1.01907e-236	1.36932e-235	down
LOC_Os06g14510	3446.4	4978.95	1913.85	-1.37968	1.63245e-236	2.19232e-235	down
LOC_Os12g44020	1584.69	657.024	2512.36	1.9344	2.19106e-236	2.94092e-235	up
LOC_Os08g27010	2621.45	5235.06	7.84653	-9.38329	2.84584e-236	3.81772e-235	down
LOC_Os03g29760	2088.84	1035.16	3142.53	1.60149	3.60381e-236	4.83192e-235	up
LOC_Os11g38260	524.312	996.226	52.3986	-4.24043	5.0335e-236	6.74517e-235	down
LOC_Os06g28840	775.553	1329.67	221.437	-2.58508	1.2533e-235	1.67859e-234	down
LOC_Os02g02490	847.445	24.0715	1670.82	6.11193	1.30725e-235	1.74989e-234	up
LOC_Os06g07300	731.166	170.634	1291.7	2.91966	1.32045e-235	1.7666e-234	up
novel.80	5568.98	7987.52	3150.43	-1.34237	1.45632e-235	1.94732e-234	down
LOC_Os11g44430	674.335	134.638	1214.03	3.17153	1.94863e-235	2.60421e-234	up
LOC_Os11g44810	9119.23	5767.56	12470.9	1.11227	1.99765e-235	2.66828e-234	up
LOC_Os01g52230	701.191	1237.77	164.611	-2.91288	2.50551e-235	3.34483e-234	down
LOC_Os05g24550	7049.69	4458.97	9640.41	1.11234	3.4425e-235	4.59322e-234	up
novel.707	1093.83	2174.82	12.8464	-7.3906	3.63702e-235	4.85015e-234	down
LOC_Os05g30190	708.558	1239.79	177.329	-2.80938	4.48644e-235	5.97967e-234	down
LOC_Os07g33610	596.66	58.6017	1134.72	4.27492	9.35934e-235	1.24677e-233	up
LOC_Os03g58540	521.364	978.701	64.0277	-3.94174	1.08933e-234	1.45033e-233	down
LOC_Os04g02780	945.729	1561.65	329.805	-2.24518	1.10199e-234	1.46639e-233	down
LOC_Os01g03620	1307.09	15.7454	2598.44	7.36699	1.64651e-234	2.1898e-233	up
LOC_Os06g36840	1399.54	2788.15	10.926	-8.0049	2.46434e-234	3.27572e-233	down
LOC_Os09g25620	621.028	107.029	1135.03	3.40826	3.03294e-234	4.02936e-233	up
LOC_Os03g08790	647.296	1140.65	153.947	-2.88875	3.22312e-234	4.27972e-233	down
LOC_Os05g46020	618.351	1096.79	139.911	-2.97336	6.34902e-234	8.42583e-233	down
LOC_Os03g32499	2107.24	3176.98	1037.49	-1.61625	6.87035e-234	9.11279e-233	down
LOC_Os01g13520	2791.69	1385.67	4197.71	1.59925	6.9879e-234	9.26374e-233	up
LOC_Os12g03860	818.068	1619.55	16.5912	-6.60996	8.9666e-234	1.18805e-232	down
LOC_Os03g04190	749.572	27.4811	1471.66	5.74408	1.04961e-233	1.38997e-232	up
LOC_Os03g51580	1261.3	474.557	2048.04	2.10897	1.19201e-233	1.57769e-232	up
LOC_Os07g32380	2194.04	1119.13	3268.96	1.54659	1.22284e-233	1.61763e-232	up
LOC_Os01g14810	1954.07	2917.1	991.043	-1.55762	1.39359e-233	1.84252e-232	down
LOC_Os01g59120	872.295	256.152	1488.44	2.53849	5.33795e-233	7.05374e-232	up
LOC_Os04g33390	1811.89	2765.46	858.333	-1.68906	5.4184e-233	7.15623e-232	down
LOC_Os03g59264	959.078	1582.24	335.919	-2.23338	5.97598e-233	7.88842e-232	down
LOC_Os08g44230	1009.45	349.139	1669.75	2.25856	7.80292e-233	1.02945e-231	up
LOC_Os07g44110	911.529	21.217	1801.84	6.4066	8.03735e-233	1.05982e-231	up
LOC_Os10g33900	681.37	1220.85	141.888	-3.09837	1.60633e-232	2.117e-231	down
LOC_Os07g40130	3319.2	1757.28	4881.13	1.47433	1.70875e-232	2.25078e-231	up
LOC_Os02g32009	5060.69	85.8692	10035.5	6.86774	1.75455e-232	2.30987e-231	up
LOC_Os09g33500	2904.4	1582.51	4226.3	1.41726	1.77478e-232	2.33527e-231	up
LOC_Os02g05030	2202.29	3288.5	1116.08	-1.55829	2.35168e-232	3.09271e-231	down
LOC_Os03g40070	684.183	154.403	1213.96	2.97648	3.85409e-232	5.06585e-231	up
LOC_Os02g31070	1704.14	2660.11	748.164	-1.82811	5.62339e-232	7.38749e-231	down
LOC_Os09g20240	5137.24	7526.98	2747.49	-1.45387	5.76447e-232	7.56882e-231	down
LOC_Os10g12354	887.316	1479.7	294.927	-2.3278	8.35225e-232	1.09608e-230	down
LOC_Os07g45090	4170.48	2400.6	5940.35	1.30678	1.11692e-231	1.46498e-230	up
LOC_Os09g31506	1065.96	2119.15	12.7685	-7.35362	1.26326e-231	1.65603e-230	down
LOC_Os09g12660	816.165	1389.76	242.567	-2.51557	1.74655e-231	2.28838e-230	down
LOC_Os11g13420	790.613	1349.59	231.638	-2.54279	1.88446e-231	2.46776e-230	down
LOC_Os09g08390	4894.68	6827.94	2961.43	-1.20572	1.93683e-231	2.53501e-230	down
LOC_Os12g04020	1022.71	1664.24	381.183	-2.12781	2.56796e-231	3.35927e-230	down
LOC_Os02g50840	8264.01	11164.3	5363.74	-1.05733	2.65096e-231	3.46601e-230	down
LOC_Os03g05290	5078.43	3047.14	7109.72	1.22248	2.83942e-231	3.71046e-230	up
LOC_Os03g51050	2432.68	1195.4	3669.96	1.61901	3.70791e-231	4.84281e-230	up
LOC_Os09g12540	921.852	1829.07	14.6302	-6.98154	4.66309e-231	6.08713e-230	down
LOC_Os07g05000	2103.13	4197.87	8.38282	-8.95823	5.98532e-231	7.80903e-230	down
LOC_Os01g72980	956.227	1588.92	323.538	-2.29972	6.45411e-231	8.41621e-230	down
LOC_Os04g46860	1745.96	2659.22	832.694	-1.67575	6.57023e-231	8.56312e-230	down
LOC_Os05g06460	1049.03	367.324	1730.74	2.23473	7.38718e-231	9.6228e-230	up
LOC_Os12g29570	689.545	1359.49	19.6008	-6.11648	1.67143e-230	2.17611e-229	down
LOC_Os04g53490	736.505	1454.73	18.2751	-6.32908	1.74182e-230	2.26657e-229	down
LOC_Os02g37160	575.51	63.1012	1087.92	4.11052	3.07696e-230	4.00182e-229	up
LOC_Os03g56670	4421.13	8836.25	6.01919	-10.5172	5.47355e-230	7.11504e-229	down
LOC_Os10g07450	559.793	1021.48	98.1068	-3.38199	5.50488e-230	7.152e-229	down
LOC_Os05g05690	677.126	1190.08	164.174	-2.85535	8.05808e-230	1.04637e-228	down
LOC_Os12g09570	1806.32	2755.2	857.451	-1.68302	1.02786e-229	1.334e-228	down
novel.14	669.344	33.7548	1304.93	5.27438	1.1776e-229	1.52754e-228	up
LOC_Os09g13650	1281.44	2034.77	528.108	-1.94897	1.25649e-229	1.62902e-228	down
LOC_Os03g14880	1213.34	457.555	1969.12	2.10543	2.16488e-229	2.80527e-228	up
LOC_Os05g06430	4350.84	2621.9	6079.78	1.21331	2.53783e-229	3.28681e-228	up
LOC_Os08g44480	2300.94	1152.78	3449.09	1.58039	2.81464e-229	3.64341e-228	up
LOC_Os01g21450	2968.05	4342.68	1593.42	-1.44587	3.90563e-229	5.053e-228	down
LOC_Os02g10290	3497.9	1986.14	5009.66	1.33462	3.95977e-229	5.12036e-228	up
LOC_Os03g07120	876.044	266.827	1485.26	2.47681	4.10816e-229	5.30947e-228	up
LOC_Os02g33140	2023.32	896.618	3150.03	1.81179	5.97778e-229	7.72177e-228	up
LOC_Os10g30450	2177.46	994.917	3359.99	1.75606	8.50833e-229	1.09848e-227	up
LOC_Os01g40200	1313.17	551.474	2074.86	1.91199	1.5628e-228	2.01664e-227	up
LOC_Os09g32500	1437.52	608.435	2266.61	1.89816	2.63671e-228	3.40063e-227	up
LOC_Os10g30580	9428.25	6126.97	12729.5	1.05481	3.43119e-228	4.42298e-227	up
LOC_Os02g36350	2855.05	9.50875	5700.6	9.22579	3.64261e-228	4.69306e-227	up
LOC_Os04g58710	12123.8	16570.2	7677.54	-1.10987	1.27727e-227	1.64475e-226	down
LOC_Os10g25300	890.147	1483.24	297.049	-2.3205	1.41505e-227	1.82122e-226	down
LOC_Os01g13740	3762.88	7519.54	6.21304	-10.2142	1.54949e-227	1.99321e-226	down
LOC_Os09g20090	598.885	53.9428	1143.83	4.40981	1.98251e-227	2.54891e-226	up
LOC_Os05g50920	576.241	70.0725	1082.41	3.9508	1.98391e-227	2.54938e-226	up
LOC_Os09g25560	602.9	100.097	1105.7	3.4623	2.0627e-227	2.64926e-226	up
LOC_Os07g06644	723.072	1256.36	189.789	-2.72562	2.18875e-227	2.80969e-226	down
LOC_Os02g05692	1407.47	525.63	2289.31	2.12429	2.99368e-227	3.84099e-226	up
LOC_Os11g16310	857.574	1431.41	283.74	-2.3341	3.29449e-227	4.22474e-226	down
LOC_Os08g37060	1238.95	502.359	1975.55	1.97502	3.50194e-227	4.48844e-226	up
LOC_Os04g38950	1064.16	1716.85	411.458	-2.06288	6.41658e-227	8.21987e-226	down
LOC_Os07g44820	2458.31	3598.37	1318.24	-1.44881	6.63032e-227	8.48928e-226	down
LOC_Os03g40270	12176.9	7932.74	16421	1.04968	7.035e-227	9.00276e-226	up
LOC_Os05g45880	705.737	28.2634	1383.21	5.61643	7.04054e-227	9.00518e-226	up
LOC_Os02g10030	655.347	33.3295	1277.37	5.26125	8.05061e-227	1.02918e-225	up
LOC_Os05g50950	502.15	942.291	62.0086	-3.92373	9.48185e-227	1.21152e-225	down
LOC_Os12g05660	671.202	1178.98	163.426	-2.85442	9.59082e-227	1.22481e-225	down
LOC_Os01g07500	717.333	174.461	1260.2	2.85169	1.38562e-226	1.76861e-225	up
LOC_Os06g09630	1722.86	797.667	2648.05	1.73055	1.94699e-226	2.48387e-225	up
LOC_Os12g36060	644.801	1172.24	117.362	-3.31364	2.01163e-226	2.565e-225	down
LOC_Os02g07820	1440.48	617.566	2263.4	1.8731	3.45565e-226	4.404e-225	up
LOC_Os12g04240	1694.11	716.434	2671.78	1.90052	3.92374e-226	4.99796e-225	up
LOC_Os06g14740	2982.34	4354.89	1609.8	-1.43528	4.04023e-226	5.1437e-225	down
LOC_Os06g39690	620.117	1218.03	22.2079	-5.77073	5.7995e-226	7.37967e-225	down
LOC_Os10g30560	666.025	144.855	1187.19	3.03581	6.95763e-226	8.84879e-225	up
LOC_Os04g53930	538.204	988.92	87.488	-3.49588	3.17407e-225	4.03475e-224	down
LOC_Os05g07860	1689.12	2572.55	805.692	-1.67514	3.95203e-225	5.02107e-224	down
LOC_Os06g51460	519.422	964.231	74.6128	-3.68035	4.57816e-225	5.81358e-224	down
LOC_Os03g06740	1218.52	1966.68	470.359	-2.06672	5.09367e-225	6.46488e-224	down
LOC_Os06g06080	962.398	1598.1	326.701	-2.28841	6.16874e-225	7.82534e-224	down
LOC_Os05g43840	1081.57	1751.49	411.651	-2.08877	6.1905e-225	7.84892e-224	down
LOC_Os11g10460	523.331	1011.37	35.2902	-4.85241	9.3399e-225	1.1836e-223	down
LOC_Os09g24690	2130.44	1059.81	3201.07	1.59502	1.0224e-224	1.29497e-223	up
LOC_Os06g22394	668.98	1318.83	19.131	-6.09565	1.11562e-224	1.41232e-223	down
LOC_Os06g30310	3302.64	4752.72	1852.55	-1.35867	1.22488e-224	1.54984e-223	down
LOC_Os06g11140	753.189	1277.5	228.881	-2.48213	1.34046e-224	1.69522e-223	down
LOC_Os06g29844	509.455	942.443	76.4678	-3.63136	2.54353e-224	3.21504e-223	down
LOC_Os03g38950	689.348	1359.8	18.9008	-6.18438	2.9714e-224	3.75396e-223	down
LOC_Os02g52450	530.701	1031.56	29.8377	-5.09814	4.617e-224	5.82996e-223	down
LOC_Os05g41420	597.782	42.9314	1152.63	4.74995	4.98229e-224	6.28801e-223	up
LOC_Os05g40384	697.126	163.164	1231.09	2.91523	5.75186e-224	7.25556e-223	up
LOC_Os02g46920	3349.74	5076.27	1623.21	-1.64505	6.1325e-224	7.73177e-223	down
LOC_Os02g03250	555.846	1002.16	109.534	-3.19131	1.58154e-223	1.99297e-222	down
LOC_Os03g16150	1845.81	853.465	2838.15	1.73281	1.76745e-223	2.22611e-222	up
LOC_Os02g25020	1005.07	17.8376	1992.3	6.79516	2.20056e-223	2.7702e-222	up
LOC_Os05g46260	2375.45	1217.59	3533.3	1.53709	5.84777e-223	7.35777e-222	up
LOC_Os08g22149	1146.42	1819.03	473.802	-1.94155	8.0493e-223	1.01226e-221	down
LOC_Os09g15370	561.509	57.2045	1065.81	4.21337	8.18883e-223	1.02929e-221	up
LOC_Os10g41470	1662.38	732.84	2591.91	1.82193	1.02635e-222	1.28941e-221	up
LOC_Os01g08260	581.23	1139.05	23.4059	-5.61597	1.05816e-222	1.32869e-221	down
LOC_Os01g07560	889.08	290.887	1487.27	2.35299	1.53337e-222	1.92442e-221	up
LOC_Os01g14140	724.766	156.295	1293.24	3.04795	3.57741e-222	4.48746e-221	up
LOC_Os02g36550	553.284	1079.65	26.9162	-5.34547	7.14452e-222	8.95747e-221	down
LOC_Os06g42060	598.343	1066.13	130.558	-3.03003	9.35431e-222	1.17221e-220	down
LOC_Os02g22780	2073.73	1038.75	3108.72	1.58168	9.51279e-222	1.19146e-220	up
LOC_Os11g04104	791.679	1324.42	258.937	-2.35574	1.12426e-221	1.40741e-220	down
LOC_Os12g33610	7061.62	14118.5	4.79713	-11.5152	1.21724e-221	1.52302e-220	down
LOC_Os03g62620	1852.4	902.433	2802.36	1.63486	1.49139e-221	1.86511e-220	up
LOC_Os05g39960	3439.09	1889	4989.17	1.40063	1.74823e-221	2.1852e-220	up
LOC_Os07g36250	593.447	1061.11	125.788	-3.07467	2.22569e-221	2.78059e-220	down
LOC_Os03g52284	636.555	36.4755	1236.64	5.07779	2.6472e-221	3.30553e-220	up
LOC_Os08g40930	691.597	1201.26	181.933	-2.72376	2.95414e-221	3.68694e-220	down
LOC_Os11g25920	599.895	79.5483	1120.24	3.8173	3.72563e-221	4.64745e-220	up
LOC_Os04g12920	599.385	1082.63	116.136	-3.22917	4.78984e-221	5.97197e-220	down
LOC_Os07g04500	842.368	1670.66	14.0748	-6.8525	5.4749e-221	6.82265e-220	down
LOC_Os09g30412	8789.57	5743.05	11836.1	1.04307	1.35903e-220	1.69273e-219	up
LOC_Os06g37440	3183.63	1733.13	4634.13	1.41857	3.11184e-220	3.87397e-219	up
LOC_Os10g18340	1799.26	843.157	2755.36	1.70788	4.19643e-220	5.22157e-219	up
LOC_Os05g11320	787.041	188.417	1385.67	2.87656	5.56955e-220	6.92664e-219	up
LOC_Os02g13870	829.007	1643.89	14.1234	-6.82876	5.66701e-220	7.04431e-219	down
LOC_Os03g62780	1356.82	2703.63	10.0066	-8.08612	8.48485e-220	1.05417e-218	down
LOC_Os06g39390	1039.08	391.075	1687.09	2.10869	1.70354e-219	2.11543e-218	up
LOC_Os03g11250	476.844	910.838	42.8493	-4.411	3.04422e-219	3.77838e-218	down
LOC_Os04g35280	803.222	1591.64	14.8046	-6.75151	3.0763e-219	3.81628e-218	down
LOC_Os01g21034	498.745	922.196	75.2949	-3.60874	4.48716e-219	5.56372e-218	down
LOC_Os08g27030	731.946	1237.87	226.021	-2.45304	4.81781e-219	5.97071e-218	down
LOC_Os10g42800	596.766	1171.18	22.3539	-5.69608	4.93407e-219	6.11172e-218	down
LOC_Os01g59020	658.055	1297.75	18.3602	-6.14104	5.58881e-219	6.91926e-218	down
LOC_Os01g16130	1610.52	2492.38	728.671	-1.77293	6.17072e-219	7.63588e-218	down
LOC_Os01g05060	924.488	1519.5	329.472	-2.20551	1.09107e-218	1.34946e-217	down
[truncated: 9,893 more rows]
