# Supplementary material
Source: Research Square preprint supplement (doi:10.21203/rs.3.rs-9447148/v1)
Supplement: Supplementary file 7 [file d95bcd9826742f0e778754af.xlsx]

## Sheet: Sheet1
Table S11 KEGG information of DEGs and DAMs（CK_Shoot vs. Salt_Shoot)
KEGG_map	Description	Rich_factor_meta	DiffRatio_meta	BgRatio_meta	P-value_meta	Adjusted P-value_meta	Index_meta	CID_meta	Rich_factor_gene	DiffRatio_gene	BgRatio_gene	P-value_gene	Adjusted P-value_gene	Index_gene	KO_gene	Hyperlink
ko00940	Phenylpropanoid biosynthesis	5/11	5/117	11/427	0.153962	0.921269	MEDP0101;MW0137756;MEDL02161;MEDL02027;MEDN0302	C00811+C18069+C02646+C01494+C00852	55/292	55/1032	292/10463	1.63416e-06	7.24479e-05	LOC_Os04g43800;LOC_Os12g33610;LOC_Os05g04380;LOC_Os01g73200;LOC_Os10g02040;LOC_Os07g48040;LOC_Os10g02070;LOC_Os09g23550;LOC_Os05g41990;LOC_Os03g13210;LOC_Os02g46970;LOC_Os09g04050;LOC_Os05g35290;LOC_Os02g14160;LOC_Os02g41680;LOC_Os01g15830;LOC_Os08g02110;LOC_Os11g10460;LOC_Os07g01370;LOC_Os02g58720;LOC_Os03g02920;LOC_Os01g67540;LOC_Os08g34790;LOC_Os11g42480;LOC_Os09g23530;LOC_Os01g10850;LOC_Os04g…	K10775+K10775+K00430+K00430+K00430+K00430+K00430+K00083+K00430+K00430+K01904+K09753+K10775+K00430+K10775+K00430+K00430+K00430+K00430+K00430+K00430+K01904+K01904+K13065+K00083+K00430+K00430+K00083+K18368+K00430+K00083+K00430+K00430+K00430+K11188+K13065+K00430+K00430+K00430+K10775+K00430+K00430+K00430+K00430+K00430+K00430+K01904+K00430+K00430+K00430+K18368+K09753+K00083+K13065+K01904	https://www.genome.jp/dbget-bin/www_bget?ko00940
ko00520	Amino sugar and nucleotide sugar metabolism	4/15	4/117	15/427	0.625296	0.921269	MW0103681;MW0103583;MEDP0068;MEDN1221	C00052+C00096+C00270+C00275	45/226	45/1032	226/10463	3.16214e-06	0.000105141	LOC_Os04g41620;LOC_Os04g41640;LOC_Os04g51880;LOC_Os05g15770;LOC_Os11g38810;LOC_Os03g55070;LOC_Os05g29990;LOC_Os05g50380;LOC_Os01g53920;LOC_Os12g25690;LOC_Os04g41680;LOC_Os01g47070;LOC_Os01g63220;LOC_Os11g18730;LOC_Os06g12280;LOC_Os05g15850;LOC_Os01g73790;LOC_Os02g39330;LOC_Os09g32670;LOC_Os01g64110;LOC_Os11g44950;LOC_Os02g51620;LOC_Os12g03720;LOC_Os12g36890;novel.126;LOC_Os01g49320;LOC_Os01g19220…	K01183+K01183+K18677+K01183+K01809+K00012+K08678+K00975+K00844+K00012+K01183+K01183+K00847+K15920+K13648+K01183+K12449+K01183+K08679+K01183+K15920+K15920+K00820+K00770+K12373+K01183+K15920+K08679+K01183+K20547+K01809+K01183+K13648+K13648+K20547+K01183+K13648+K01183+K08678+K01183+K13379+K12373+K01183+K00963+K01183	https://www.genome.jp/dbget-bin/www_bget?ko00520
ko00053	Ascorbate and aldarate metabolism	2/7	2/117	7/427	0.614625	0.921269	MW0103583;MW0148348	C00096+C20896	19/89	19/1032	89/10463	0.000914035	0.0151958	LOC_Os06g37150;LOC_Os12g08810;LOC_Os03g55070;LOC_Os06g36560;LOC_Os01g62870;LOC_Os12g25690;LOC_Os02g43280;LOC_Os10g36390;LOC_Os02g49720;LOC_Os09g32670;LOC_Os07g02810;LOC_Os07g32660;LOC_Os06g46500;LOC_Os04g45720;LOC_Os08g41440;LOC_Os04g14680;LOC_Os02g47790;LOC_Os04g29090;LOC_Os09g20090	K00423+K14190+K00012+K00469+K00002+K00012+K00128+K00423+K00128+K08679+K00423+K00423+K00423+K00128+K08679+K00434+K08232+K00103+K00423	https://www.genome.jp/dbget-bin/www_bget?ko00053
ko00906	Carotenoid biosynthesis	2/10	2/117	10/427	0.809103	0.921269	MW0016109;MW0052883	C08591+C00448	16/71	16/1032	71/10463	0.00123846	0.0183017	LOC_Os02g47470;LOC_Os02g47510;LOC_Os12g42280;LOC_Os09g28390;LOC_Os07g05940;LOC_Os09g38320;LOC_Os03g05920;LOC_Os03g44380;LOC_Os03g05880;LOC_Os07g33480;LOC_Os12g43590;LOC_Os03g05840;LOC_Os10g38940;LOC_Os07g18162;LOC_Os12g24800;LOC_Os07g18158	K09843+K09840+K09840+K09843+K09840+K02291+K09838+K09840+K09838+K09843+K09835+K09838+K15746+K09842+K09840+K09842	https://www.genome.jp/dbget-bin/www_bget?ko00906
ko00904	Diterpenoid biosynthesis	2/3	2/117	3/427	0.183457	0.921269	MW0054123;MW0168671	C09118+C06087	30/175	30/1032	175/10463	0.00182393	0.0242583	LOC_Os11g41710;LOC_Os01g66100;LOC_Os03g63970;LOC_Os06g02019;LOC_Os05g34854;LOC_Os03g61740;LOC_Os08g39694;LOC_Os03g21419;LOC_Os06g43430;LOC_Os09g10340;LOC_Os01g11150;LOC_Os05g43880;LOC_Os04g44150;LOC_Os06g19070;LOC_Os10g05490;LOC_Os01g08220;LOC_Os02g09220;LOC_Os07g46950;LOC_Os04g09920;LOC_Os10g30410;LOC_Os07g46870;LOC_Os11g41680;LOC_Os09g27500;LOC_Os10g30390;LOC_Os02g38930;LOC_Os03g44740;LOC_Os11g…	K16083+K05282+K05282+K04123+K05282+K13070+K16084+K20666+K16083+K16085+K04125+K04125+K04125+K21718+K21718+K04124+K21291+K13070+K16085+K16083+K13070+K16083+K21718+K21291+K21291+K22640+K13070+K21291+K13070+K16085	https://www.genome.jp/dbget-bin/www_bget?ko00904
ko01110	Biosynthesis of secondary metabolites	57/191	57/117	191/427	0.181635	0.921269	MW0054123;MEDL02462;MW0000243;MEDN0198;MEDL02396;MEDL00575;MEDP0081;MEDP0101;MEDP0085;MEDN0151;MEDL01762;MW0016109;MW0011792;MEDN0037;MW0061670;MEDP0823;MEDP0457;MW0103902;MW0104839;MW0010239;MW0137756;MW0140185;MW0141993;MW0148736;MW0142541;MW0140437;MW0142961;MW0114088;MW0103583;MEDTN02215;pme0376;MW0052883;MEDL02161;MEDP0208;MEDL02027;MEDN0302;MEDP0507;MEDL02471;MEDL02158;MEDN0417;MW0000823;ME…	C09118+C01005+C12448+C00158+C00089+C00407+C00780+C00811+C00483+C00147+C09833+C08591+C00350+C03758+C03313+C05607+C00430+C01107+C00988+C07592+C18069+C21412+C20466+C18033+C17220+C21410+C21322+C05839+C00096+C00002+C00509+C00448+C02646+C00042+C01494+C00852+C01772+C00016+C14536+C00418+C03742+C00979+C00186+C04454+C00758+C00493+C05382+C01912+C10874+C01236+C00417+C00844+C08795+C00275+C06087+C04590+C21260	299/2704	299/1032	2704/10463	0.00913161	0.0867503	LOC_Os01g09700;LOC_Os02g47470;LOC_Os03g09250;LOC_Os03g19427;LOC_Os03g28330;LOC_Os04g43800;LOC_Os05g49800;LOC_Os09g12290;LOC_Os10g17260;LOC_Os11g38810;LOC_Os12g08760;LOC_Os12g08810;LOC_Os12g33610;LOC_Os05g04380;LOC_Os04g43650;LOC_Os02g38920;LOC_Os02g36340;LOC_Os06g04070;LOC_Os03g19250;LOC_Os01g73200;LOC_Os01g67860;LOC_Os08g34720;LOC_Os10g02040;LOC_Os07g48040;LOC_Os08g25720;LOC_Os11g41710;LOC_Os03g…	K01762+K09843+K01858+K05953+K00695+K10775+K00053+K12524+K05280+K01809+K01637+K14190+K10775+K00430+K01620+K00134+K14652+K01583+K01913+K00430+K01623+K00058+K00430+K00430+K00895+K16083+K05953+K01637+K01006+K13051+K20623+K01845+K00928+K00161+K09590+K16818+K13227+K14682+K00827+K13496+K00660+K15777+K00948+K00975+K19073+K13496+K01723+K14157+K00430+K20884+K01490+K00318+K13222+K00547+K01792+K05282+K00083+…	https://www.genome.jp/dbget-bin/www_bget?ko01110
ko00270	Cysteine and methionine metabolism	3/16	3/117	16/427	0.861186	0.921269	MEDL02462;MEDN1387;MW0108967	C01005+C00979+C01077	25/164	25/1032	164/10463	0.0182081	0.150751	LOC_Os01g09700;LOC_Os03g19427;LOC_Os09g12290;LOC_Os11g29370;LOC_Os08g34720;LOC_Os03g19420;LOC_Os03g63330;LOC_Os03g07570;LOC_Os12g41390;LOC_Os04g57400;LOC_Os04g47190;LOC_Os09g27820;LOC_Os04g57410;LOC_Os10g34350;LOC_Os10g28350;LOC_Os01g59920;LOC_Os10g01570;LOC_Os04g46560;LOC_Os07g08500;novel.574;LOC_Os07g48980;LOC_Os03g21960;LOC_Os02g10830;LOC_Os05g13790;LOC_Os04g48850	K01762+K05953+K12524+K16054+K00058+K05953+K00928+K00827+K00547+K00899+K00826+K05933+K00899+K23977+K08967+K22846+K00558+K00025+K00558+K09880+K05953+K00827+K00640+K00558+K20772	https://www.genome.jp/dbget-bin/www_bget?ko00270
ko00250	Alanine, aspartate and glutamate metabolism	3/8	3/117	8/427	0.381753	0.921269	MEDN0198;MEDP0208;MEDN0561	C00158+C00042+C12270	14/78	14/1032	78/10463	0.019269	0.150751	LOC_Os04g55710;LOC_Os03g07570;LOC_Os02g04170;LOC_Os10g25130;LOC_Os03g18130;LOC_Os03g13300;LOC_Os04g37500;LOC_Os12g03720;LOC_Os04g52440;LOC_Os10g25140;LOC_Os03g18120;LOC_Os02g43470;LOC_Os03g21960;LOC_Os05g48200	K13051+K00827+K00278+K00814+K01953+K01580+K01580+K00820+K16871+K00814+K01953+K00261+K00827+K00264	https://www.genome.jp/dbget-bin/www_bget?ko00250
ko00500	Starch and sucrose metabolism	1/8	1/117	8/427	0.924739	0.937763	MEDL02396	C00089	47/366	47/1032	366/10463	0.0352423	0.229189	LOC_Os03g28330;LOC_Os05g50380;LOC_Os04g39880;LOC_Os01g53920;LOC_Os03g55090;LOC_Os03g49610;LOC_Os09g23084;LOC_Os04g43390;LOC_Os04g33640;LOC_Os01g63220;LOC_Os06g13830;LOC_Os02g44230;LOC_Os02g58480;LOC_Os04g33740;LOC_Os07g07340;LOC_Os06g46340;LOC_Os03g26910;LOC_Os02g51680;LOC_Os06g14540;LOC_Os10g40550;LOC_Os04g24430;LOC_Os05g08890;LOC_Os03g12140;LOC_Os03g54910;LOC_Os07g35520;LOC_Os02g50040;LOC_Os02g…	K00695+K00975+K01188+K00844+K00688+K05350+K01179+K05350+K19891+K00847+K01179+K01087+K00695+K01193+K19893+K01187+K01087+K01087+K01179+K01087+K00695+K01193+K19891+K19892+K19891+K01179+K19891+K19893+K19891+K00695+K05350+K19891+K01193+K19891+K19891+K01179+K01179+K19893+K19892+K05350+K01188+K01087+K19891+K00963+K01188+K01179+K19892	https://www.genome.jp/dbget-bin/www_bget?ko00500
ko00480	Glutathione metabolism	2/6	2/117	6/427	0.523004	0.921269	MEDN0031;MW0146779	C01879+C03646	21/141	21/1032	141/10463	0.0359306	0.229189	LOC_Os03g04220;LOC_Os06g08670;LOC_Os10g39740;LOC_Os01g27360;LOC_Os03g04240;LOC_Os10g38740;LOC_Os02g38840;LOC_Os10g38470;LOC_Os04g14680;LOC_Os03g04250;LOC_Os07g44440;LOC_Os06g14620;LOC_Os05g34150;LOC_Os10g38600;LOC_Os05g49760;LOC_Os01g27340;LOC_Os10g38160;novel.392;LOC_Os10g25590;LOC_Os05g05610;LOC_Os01g27480	K00799+K00432+K00799+K00799+K00799+K00799+K00036+K00799+K00434+K00799+K11188+K10808+K00799+K00799+K00031+K00799+K00799+K00799+K00799+K00799+K00799	https://www.genome.jp/dbget-bin/www_bget?ko00480
ko01100	Metabolic pathways	94/310	94/117	310/427	0.0171697	0.921269	MW0014506;MEDTN00717;MEDP1015;MEDL02462;MW0115792;MW0000243;MW0001273;MEDN0198;MEDL02396;MEDL00575;MEDP0081;MEDP0101;MEDP0085;MEDN0455;MEDN0151;MEDN0031;MEDN1545;MEDP1153;MEDL02163;MEDN0163;MEDP0603;MEDP0396;MW0011792;MEDN0037;MW0061670;MEDP0823;MEDP0176;MEDP0894;MW0049160;MEDL02423;MW0103639;MEDP0457;MW0103902;MW0144360;MEDN0530;MW0104839;MEDP0298;MW0103681;MW0012180;MW0151247;MW0140185;MW014873…	C16677+C16678+C04185+C01005+C05828+C12448+C02814+C00158+C00089+C00407+C00780+C00811+C00483+C00242+C00147+C01879+C00144+C14748+C05966+C00262+C06577+C00239+C00350+C03758+C03313+C05607+C00214+C05587+C01909+C02305+C01103+C00430+C01107+C00053+C02656+C00988+C02378+C00052+C14822+C06399+C21412+C18033+C21322+C00096+C00002+C02273+C00509+C00448+C02646+C00042+C12621+C00212+C00492+C00633+C01494+C07209+C01772+…	446/4244	446/1032	4244/10463	0.0365001	0.229189	LOC_Os01g09700;LOC_Os01g25484;LOC_Os01g41710;LOC_Os01g68770;LOC_Os02g10390;LOC_Os03g09250;LOC_Os03g19427;LOC_Os03g28330;LOC_Os03g39610;LOC_Os04g41620;LOC_Os04g41640;LOC_Os04g43800;LOC_Os04g51880;LOC_Os05g06920;LOC_Os05g15770;LOC_Os05g49800;LOC_Os06g21590;LOC_Os06g37150;LOC_Os07g37550;LOC_Os08g33820;LOC_Os09g12290;LOC_Os09g17740;LOC_Os10g17260;LOC_Os11g13890;LOC_Os11g38810;LOC_Os12g08760;LOC_Os12g…	K01762+K00366+K08912+K17285+K08909+K01858+K05953+K00695+K08913+K01183+K01183+K10775+K18677+K00951+K01183+K00053+K08907+K00423+K08914+K08910+K12524+K08912+K05280+K08916+K01809+K01637+K14190+K10775+K00430+K01620+K00134+K14652+K01583+K01913+K00430+K16054+K01623+K00012+K17839+K24221+K00058+K00430+K00430+K00895+K05953+K14332+K01637+K08917+K01006+K13051+K20623+K01845+K00928+K00951+K00161+K02639+K09590+…	https://www.genome.jp/dbget-bin/www_bget?ko01100
ko01250	Biosynthesis of nucleotide sugars	6/18	6/117	18/427	0.366992	0.921269	MW0103681;MW0148736;MW0103583;MEDN0461;MEDP0068;MEDN1221	C00052+C18033+C00096+C05382+C00270+C00275	17/113	17/1032	113/10463	0.0508381	0.293977	LOC_Os04g51880;LOC_Os11g38810;LOC_Os03g55070;LOC_Os05g29990;LOC_Os06g36560;LOC_Os05g50380;LOC_Os01g53920;LOC_Os12g25690;LOC_Os01g63220;LOC_Os01g73790;LOC_Os09g32670;LOC_Os12g03720;LOC_Os08g41440;LOC_Os01g03710;LOC_Os03g17230;LOC_Os06g08620;LOC_Os01g15910	K18677+K01809+K00012+K08678+K00469+K00975+K00844+K00012+K00847+K12449+K08679+K00820+K08679+K01809+K08678+K13379+K00963	https://www.genome.jp/dbget-bin/www_bget?ko01250
ko00650	Butanoate metabolism	1/7	1/117	7/427	0.895678	0.921269	MEDP0208	C00042	7/36	7/1032	36/10463	0.0588149	0.325933	LOC_Os03g19250;LOC_Os03g04130;LOC_Os09g34960;LOC_Os03g13300;LOC_Os04g37500;LOC_Os04g52440;LOC_Os04g32010	K01913+K01913+K01641+K01580+K01580+K16871+K01652	https://www.genome.jp/dbget-bin/www_bget?ko00650
ko01232	Nucleotide metabolism	10/32	10/117	32/427	0.37252	0.921269	MEDN0455;MEDN0151;MEDN1545;MEDN0163;MEDP0396;MEDP0176;MEDTN02215;MEDP0160;MEDP0171;MEDN0419	C00242+C00147+C00144+C00262+C00239+C00214+C00002+C00212+C00294+C00105	15/100	15/1032	100/10463	0.0651463	0.344344	LOC_Os01g51540;LOC_Os04g42520;LOC_Os07g49270;LOC_Os05g33630;LOC_Os01g43020;LOC_Os07g43170;LOC_Os02g53790;LOC_Os03g56800;LOC_Os11g03290;LOC_Os11g03230;LOC_Os06g14620;LOC_Os07g30150;LOC_Os10g31930;LOC_Os12g26060;LOC_Os01g12060	K01489+K00759+K01490+K01240+K01937+K13800+K13800+K00088+K14641+K14641+K10808+K00759+K01519+K13998+K01489	https://www.genome.jp/dbget-bin/www_bget?ko01232
ko00230	Purine metabolism	13/32	13/117	32/427	0.0654715	0.921269	MEDN0455;MEDN0151;MEDN1545;MEDN0163;MW0144360;MEDTN02215;MEDP0160;MEDL02152;MEDN0537;MW0103319;MEDP0171;MW0148404;MEDL00331	C00242+C00147+C00144+C00262+C00053+C00002+C00212+C00575+C00301+C06194+C00294+C01260+C01367	20/149	20/1032	149/10463	0.0955436	0.453832	LOC_Os05g06920;LOC_Os09g27050;LOC_Os04g42520;LOC_Os04g58390;LOC_Os06g41360;LOC_Os07g49270;LOC_Os08g39590;LOC_Os03g56800;LOC_Os04g46280;LOC_Os11g03290;LOC_Os11g03230;LOC_Os10g05250;LOC_Os06g14620;LOC_Os03g18630;LOC_Os07g30150;LOC_Os09g02250;LOC_Os11g06780;LOC_Os10g31930;LOC_Os12g09540;LOC_Os11g19480	K00951+K00951+K00759+K01466+K00948+K01490+K27625+K00088+K26956+K14641+K14641+K27625+K10808+K27625+K00759+K27625+K27625+K01519+K01945+K27625	https://www.genome.jp/dbget-bin/www_bget?ko00230
ko00999	Biosynthesis of various plant secondary metabolites	7/25	7/117	25/427	0.551893	0.921269	MW0155568;MW0114088;MW0052883;MEDP0507;MEDL02744;MEDN0343;MEDL02244	C17055+C05839+C00448+C01772+C00758+C00493+C10874	18/133	18/1032	133/10463	0.103224	0.473408	LOC_Os03g19427;LOC_Os03g19420;LOC_Os04g25440;LOC_Os03g58290;LOC_Os04g39880;LOC_Os03g49610;LOC_Os04g43390;LOC_Os02g51910;LOC_Os10g18490;LOC_Os07g30690;LOC_Os04g43400;LOC_Os07g48980;LOC_Os02g36830;LOC_Os04g43380;LOC_Os09g31410;LOC_Os09g03140;LOC_Os10g17650;LOC_Os07g13780	K05953+K05953+K13227+K13222+K01188+K05350+K05350+K13227+K13227+K13227+K05350+K05953+K13227+K05350+K01188+K13227+K01188+K13227	https://www.genome.jp/dbget-bin/www_bget?ko00999
ko00040	Pentose and glucuronate interconversions	1/4	1/117	4/427	0.723677	0.921269	MW0114263	C02273	19/143	19/1032	143/10463	0.110103	0.488124	LOC_Os03g55070;LOC_Os04g05050;LOC_Os01g62870;LOC_Os12g25690;LOC_Os01g21034;LOC_Os06g49760;LOC_Os12g36810;LOC_Os06g09340;LOC_Os05g50960;LOC_Os11g07090;LOC_Os03g03350;LOC_Os01g66710;LOC_Os07g47830;LOC_Os02g54190;LOC_Os10g31910;LOC_Os01g15039;LOC_Os02g03750;LOC_Os01g15910;LOC_Os03g59330	K00012+K01728+K00002+K00012+K01051+K01051+K01184+K01051+K01184+K01051+K01184+K01184+K01051+K01051+K01728+K01051+K01184+K00963+K01184	https://www.genome.jp/dbget-bin/www_bget?ko00040
ko00908	Zeatin biosynthesis	3/7	3/117	7/427	0.293949	0.921269	MEDN0151;MEDTN02215;MEDN1387	C00147+C00002+C00979	12/89	12/1032	89/10463	0.164253	0.624161	LOC_Os05g42040;LOC_Os05g42060;LOC_Os04g46970;LOC_Os02g11110;LOC_Os09g16090;LOC_Os02g11700;LOC_Os04g46980;LOC_Os01g41430;LOC_Os01g56810;LOC_Os02g11130;LOC_Os01g10110;LOC_Os06g17020	K13496+K13496+K13495+K13496+K13496+K13496+K13495+K13496+K00279+K13496+K00279+K13496	https://www.genome.jp/dbget-bin/www_bget?ko00908
ko00340	Histidine metabolism	1/5	1/117	5/427	0.800107	0.921269	MW0115792	C05828	4/23	4/1032	23/10463	0.186044	0.668753	LOC_Os02g43280;LOC_Os02g49720;LOC_Os04g45720;LOC_Os01g52594	K00128+K00128+K00128+K00817	https://www.genome.jp/dbget-bin/www_bget?ko00340
ko01210	2-Oxocarboxylic acid metabolism	5/20	5/117	20/427	0.682224	0.921269	MEDN0198;MEDL00575;MW0142541;MEDN0203;MEDN1245	C00158+C00407+C17220+C00417+C20653	12/96	12/1032	96/10463	0.235141	0.801878	LOC_Os05g49800;LOC_Os03g63330;LOC_Os04g02900;LOC_Os03g31690;LOC_Os03g07570;LOC_Os10g25130;LOC_Os04g47190;LOC_Os06g13720;LOC_Os10g25140;LOC_Os05g49760;LOC_Os04g32010;LOC_Os03g21960	K00053+K00928+K00161+K14682+K00827+K00814+K00826+K00161+K00814+K00031+K01652+K00827	https://www.genome.jp/dbget-bin/www_bget?ko01210
ko00591	Linoleic acid metabolism	1/7	1/117	7/427	0.895678	0.921269	MEDN1426	C14833	4/26	4/1032	26/10463	0.250892	0.801878	LOC_Os08g39840;LOC_Os04g37430;LOC_Os03g50030;LOC_Os08g39850	K00454+K00454+K01047+K00454	https://www.genome.jp/dbget-bin/www_bget?ko00591
ko00965	Betalain biosynthesis	2/4	2/117	4/427	0.302442	0.921269	MEDN0037;MEDP0894	C03758+C05587	2/10	2/1032	10/10463	0.25859	0.801878	LOC_Os01g65690;LOC_Os10g26110	K15777+K01593	https://www.genome.jp/dbget-bin/www_bget?ko00965
ko00909	Sesquiterpenoid and triterpenoid biosynthesis	1/2	1/117	2/427	0.473398	0.921269	MW0052883	C00448	3/18	3/1032	18/10463	0.259254	0.801878	LOC_Os03g59040;LOC_Os03g08624;LOC_Os03g12900	K00801+K15891+K00511	https://www.genome.jp/dbget-bin/www_bget?ko00909
ko00941	Flavonoid biosynthesis	4/8	4/117	8/427	0.147609	0.921269	MEDL01762;pme0376;MEDN0302;MW0138375	C09833+C00509+C00852+C09806	12/100	12/1032	100/10463	0.280213	0.847007	LOC_Os10g17260;LOC_Os11g32650;LOC_Os11g02440;LOC_Os04g09604;LOC_Os08g43440;LOC_Os06g06720;LOC_Os11g42480;LOC_Os09g18450;LOC_Os06g08610;LOC_Os02g52840;LOC_Os02g21550;LOC_Os11g42370	K05280+K00660+K01859+K22440+K05280+K05278+K13065+K05278+K13065+K05278+K05278+K13065	https://www.genome.jp/dbget-bin/www_bget?ko00941
ko00240	Pyrimidine metabolism	4/18	4/117	18/427	0.775051	0.921269	MEDP0396;MEDP0176;MW0103639;MEDN0419	C00239+C00214+C01103+C00105	10/82	10/1032	82/10463	0.287614	0.85006	LOC_Os01g51540;LOC_Os05g33630;LOC_Os01g43020;LOC_Os07g43170;LOC_Os02g53790;LOC_Os11g03290;LOC_Os11g03230;LOC_Os06g14620;LOC_Os12g26060;LOC_Os01g12060	K01489+K01240+K01937+K13800+K13800+K14641+K14641+K10808+K13998+K01489	https://www.genome.jp/dbget-bin/www_bget?ko00240
ko00010	Glycolysis / Gluconeogenesis	1/6	1/117	6/427	0.855527	0.921269	MEDN0325	C00186	20/179	20/1032	179/10463	0.311435	0.900454	LOC_Os02g38920;LOC_Os03g19250;LOC_Os01g67860;LOC_Os08g25720;LOC_Os03g31750;LOC_Os04g02900;LOC_Os04g51390;LOC_Os01g62870;LOC_Os01g53920;LOC_Os02g43280;LOC_Os11g10510;LOC_Os02g49720;LOC_Os03g04130;LOC_Os04g45720;LOC_Os06g13720;LOC_Os01g46950;LOC_Os11g10520;LOC_Os05g39320;LOC_Os11g04300;LOC_Os09g02540	K00134+K01913+K01623+K00895+K01006+K00161+K01792+K00002+K00844+K00128+K18857+K00128+K01913+K00128+K00161+K01792+K18857+K01568+K15634+K01623	https://www.genome.jp/dbget-bin/www_bget?ko00010
ko00280	Valine, leucine and isoleucine degradation	1/3	1/117	3/427	0.618368	0.921269	MEDL00575	C00407	7/57	7/1032	57/10463	0.329681	0.932926	LOC_Os03g07570;LOC_Os02g43280;LOC_Os04g47190;LOC_Os02g49720;LOC_Os09g34960;LOC_Os04g45720;LOC_Os03g21960	K00827+K00128+K00826+K00128+K01641+K00128+K00827	https://www.genome.jp/dbget-bin/www_bget?ko00280
ko00360	Phenylalanine metabolism	4/10	4/117	10/427	0.281039	0.921269	MEDP0823;MEDP0208;MEDL01891;MEDP0507	C05607+C00042+C12621+C01772	8/67	8/1032	67/10463	0.339701	0.938801	LOC_Os04g43800;LOC_Os12g33610;LOC_Os05g35290;LOC_Os02g41680;LOC_Os10g26110;LOC_Os07g38440;LOC_Os02g41670;LOC_Os01g52594	K10775+K10775+K10775+K10775+K01593+K00276+K10775+K00817	https://www.genome.jp/dbget-bin/www_bget?ko00360
ko02010	ABC transporters	8/30	8/117	30/427	0.609974	0.921269	MEDL02396;MEDL00575;MEDP0457;MW0114263;MEDP0160;MEDN0236;MEDP0171;MW0144868	C00089+C00407+C00430+C02273+C00212+C00492+C00294+C20573	16/144	16/1032	144/10463	0.345874	0.938801	LOC_Os08g29570;LOC_Os12g16690;LOC_Os04g38570;novel.724;LOC_Os10g35180;LOC_Os02g46680;LOC_Os03g17350;LOC_Os11g37700;LOC_Os01g61940;LOC_Os04g54930;LOC_Os01g42900;LOC_Os05g31910;LOC_Os03g06600;LOC_Os01g34970;LOC_Os03g08380;LOC_Os08g30780	K08711+K05658+K05658+K05681+K05681+K05658+K05681+K08711+K05681+K05658+K05681+K05681+K05658+K05658+K05658+K05681	https://www.genome.jp/dbget-bin/www_bget?ko02010
ko00051	Fructose and mannose metabolism	3/7	3/117	7/427	0.293949	0.921269	MW0103583;MEDN0325;MEDN1221	C00096+C00186+C00275	10/87	10/1032	87/10463	0.35425	0.942305	LOC_Os11g38810;LOC_Os01g67860;LOC_Os08g25720;LOC_Os01g53920;LOC_Os03g61280;LOC_Os01g63220;LOC_Os01g54300;LOC_Os03g61270;LOC_Os01g03710;LOC_Os09g02540	K01809+K01623+K00895+K00844+K19355+K00847+K19355+K19355+K01809+K01623	https://www.genome.jp/dbget-bin/www_bget?ko00051
ko00620	Pyruvate metabolism	2/4	2/117	4/427	0.302442	0.921269	MEDP0208;MEDN0325	C00042+C00186	13/118	13/1032	118/10463	0.380184	0.99146	LOC_Os03g19250;LOC_Os03g31750;LOC_Os04g02900;LOC_Os01g62870;LOC_Os02g43280;LOC_Os11g10510;LOC_Os02g49720;LOC_Os04g40990;LOC_Os03g04130;LOC_Os04g45720;LOC_Os06g13720;LOC_Os04g46560;LOC_Os11g10520	K01913+K01006+K00161+K00002+K00128+K18857+K00128+K01638+K01913+K00128+K00161+K00025+K18857	https://www.genome.jp/dbget-bin/www_bget?ko00620
ko00290	Valine, leucine and isoleucine biosynthesis	1/2	1/117	2/427	0.473398	0.921269	MEDL00575	C00407	3/24	3/1032	24/10463	0.426712	1	LOC_Os05g49800;LOC_Os04g47190;LOC_Os04g32010	K00053+K00826+K01652	https://www.genome.jp/dbget-bin/www_bget?ko00290
ko00966	Glucosinolate biosynthesis	2/11	2/117	11/427	0.85134	0.921269	MEDL00575;MW0142541	C00407+C17220	1/6	1/1032	6/10463	0.463783	1	LOC_Os04g47190	K00826	https://www.genome.jp/dbget-bin/www_bget?ko00966
ko00760	Nicotinate and nicotinamide metabolism	2/10	2/117	10/427	0.809103	0.921269	MEDP0208;MEDL02165	C00042+C05843	3/29	3/1032	29/10463	0.555563	1	LOC_Os02g04170;LOC_Os05g33630;LOC_Os04g46280	K00278+K01240+K26956	https://www.genome.jp/dbget-bin/www_bget?ko00760
ko00350	Tyrosine metabolism	7/17	7/117	17/427	0.153172	0.921269	MEDP1015;MEDP0101;MEDP0085;MEDN0037;MEDP0894;MEDP0208;MEDL02353	C04185+C00811+C00483+C03758+C05587+C00042+C01850	6/62	6/1032	62/10463	0.582329	1	LOC_Os11g10510;LOC_Os10g26110;LOC_Os11g10520;LOC_Os07g38440;LOC_Os01g52594;LOC_Os01g58100	K18857+K01593+K18857+K00276+K00817+K00422	https://www.genome.jp/dbget-bin/www_bget?ko00350
ko00260	Glycine, serine and threonine metabolism	2/8	2/117	8/427	0.692249	0.921269	MEDL02462;MEDP0457	C01005+C00430	9/95	9/1032	95/10463	0.601806	1	LOC_Os09g12290;LOC_Os04g43650;LOC_Os08g34720;LOC_Os03g63330;LOC_Os03g07570;LOC_Os01g49890;LOC_Os07g38440;LOC_Os11g04300;LOC_Os03g21960	K12524+K01620+K00058+K00928+K00827+K01733+K00276+K15634+K00827	https://www.genome.jp/dbget-bin/www_bget?ko00260
ko00660	C5-Branched dibasic acid metabolism	1/3	1/117	3/427	0.618368	0.921269	MEDN0203	C00417	1/9	1/1032	9/10463	0.6074	1	LOC_Os04g32010	K01652	https://www.genome.jp/dbget-bin/www_bget?ko00660
ko00100	Steroid biosynthesis	1/3	1/117	3/427	0.618368	0.921269	MW0052883	C00448	5/53	5/1032	53/10463	0.609697	1	LOC_Os03g59040;LOC_Os03g12900;LOC_Os02g21810;LOC_Os03g29150;LOC_Os05g12040	K00801+K00511+K05917+K23558+K05917	https://www.genome.jp/dbget-bin/www_bget?ko00100
ko00310	Lysine degradation	1/6	1/117	6/427	0.855527	0.921269	MEDP0208	C00042	6/65	6/1032	65/10463	0.629487	1	LOC_Os02g54254;LOC_Os02g43280;LOC_Os02g49720;LOC_Os04g45720;LOC_Os09g19830;LOC_Os08g30910	K14157+K00128+K00128+K00128+K11420+K11420	https://www.genome.jp/dbget-bin/www_bget?ko00310
ko00562	Inositol phosphate metabolism	1/2	1/117	2/427	0.473398	0.921269	MW0146762	C19799	10/110	10/1032	110/10463	0.654826	1	LOC_Os03g09250;LOC_Os01g51890;LOC_Os06g36560;LOC_Os03g51610;LOC_Os03g57950;LOC_Os02g26720;LOC_Os01g08780;LOC_Os01g59880;LOC_Os03g15550;LOC_Os03g24170	K01858+K24221+K00469+K00913+K24221+K00913+K24221+K24221+K00889+K00889	https://www.genome.jp/dbget-bin/www_bget?ko00562
ko00950	Isoquinoline alkaloid biosynthesis	4/12	4/117	12/427	0.426379	0.921269	MEDP0101;MEDP0085;MEDN0037;MW0010239	C00811+C00483+C03758+C07592	3/35	3/1032	35/10463	0.684883	1	LOC_Os10g26110;LOC_Os07g38440;LOC_Os01g58100	K01593+K00276+K00422	https://www.genome.jp/dbget-bin/www_bget?ko00950
ko00740	Riboflavin metabolism	2/6	2/117	6/427	0.523004	0.921269	MEDL02471;MW0143562	C00016+C04454	3/35	3/1032	35/10463	0.684883	1	LOC_Os02g36340;LOC_Os10g41930;LOC_Os11g34720	K14652+K20884+K14379	https://www.genome.jp/dbget-bin/www_bget?ko00740
ko00590	Arachidonic acid metabolism	7/14	7/117	14/427	0.0574417	0.921269	MEDP1153;MEDL02163;MW0012180;MEDN0669;MEDN1419;MEDN0774;MW0012046	C14748+C05966+C14822+C14732+C14807+C14749+C14782	1/17	1/1032	17/10463	0.829114	1	LOC_Os03g50030	K01047	https://www.genome.jp/dbget-bin/www_bget?ko00590
ko00945	Stilbenoid, diarylheptanoid and gingerol biosynthesis	1/5	1/117	5/427	0.800107	0.921269	MEDN0302	C00852	4/58	4/1032	58/10463	0.837053	1	LOC_Os11g42480;LOC_Os06g08610;LOC_Os07g34260;LOC_Os11g42370	K13065+K13065+K17212+K13065	https://www.genome.jp/dbget-bin/www_bget?ko00945
ko00030	Pentose phosphate pathway	2/9	2/117	9/427	0.756614	0.921269	MEDN0461;MW0114218	C05382+C01236	5/71	5/1032	71/10463	0.842175	1	LOC_Os01g67860;LOC_Os08g25720;LOC_Os06g41360;LOC_Os02g38840;LOC_Os09g02540	K01623+K00895+K00948+K00036+K01623	https://www.genome.jp/dbget-bin/www_bget?ko00030
ko00710	Carbon fixation by Calvin cycle	1/6	1/117	6/427	0.855527	0.921269	MEDN0461	C05382	7/96	7/1032	96/10463	0.847582	1	LOC_Os02g38920;LOC_Os01g67860;LOC_Os03g31750;LOC_Os10g25130;LOC_Os04g46560;LOC_Os10g25140;LOC_Os09g02540	K00134+K01623+K01006+K00814+K00025+K00814+K01623	https://www.genome.jp/dbget-bin/www_bget?ko00710
ko00330	Arginine and proline metabolism	1/6	1/117	6/427	0.855527	0.921269	MEDL02423	C02305	6/85	6/1032	85/10463	0.856135	1	LOC_Os06g04070;LOC_Os04g57550;LOC_Os10g40360;LOC_Os02g43280;LOC_Os02g49720;LOC_Os04g45720	K01583+K17839+K00318+K00128+K00128+K00128	https://www.genome.jp/dbget-bin/www_bget?ko00330
ko00460	Cyanoamino acid metabolism	3/9	3/117	9/427	0.466973	0.921269	MEDL00575;MW0000823;MEDL01997	C00407+C03742+C00844	8/110	8/1032	110/10463	0.86158	1	LOC_Os04g55710;LOC_Os04g39880;LOC_Os03g49610;LOC_Os04g43390;LOC_Os04g43400;LOC_Os04g43380;LOC_Os09g31410;LOC_Os10g17650	K13051+K01188+K05350+K05350+K05350+K05350+K01188+K01188	https://www.genome.jp/dbget-bin/www_bget?ko00460
ko00052	Galactose metabolism	4/13	4/117	13/427	0.496943	0.921269	MEDL02396;MW0103681;MEDN0236;MEDN0844	C00089+C00052+C00492+C01613	13/169	13/1032	169/10463	0.862771	1	LOC_Os07g10840;LOC_Os01g53920;LOC_Os10g35070;LOC_Os03g06940;LOC_Os07g48830;LOC_Os01g39830;LOC_Os04g33740;LOC_Os04g40510;LOC_Os06g46340;LOC_Os05g08890;LOC_Os03g59430;LOC_Os04g56930;LOC_Os01g15910	K06617+K00844+K07407+K12309+K18819+K12309+K01193+K06617+K01187+K01193+K06617+K01193+K00963	https://www.genome.jp/dbget-bin/www_bget?ko00052
ko00920	Sulfur metabolism	3/4	3/117	4/427	0.0644715	0.921269	MW0144360;MEDP0208;MEDN1387	C00053+C00042+C00979	3/49	3/1032	49/10463	0.874488	1	LOC_Os01g68770;LOC_Os07g37230;LOC_Os02g10830	K17285+K01082+K00640	https://www.genome.jp/dbget-bin/www_bget?ko00920
ko01230	Biosynthesis of amino acids	6/27	6/117	27/427	0.798673	0.921269	MEDL02462;MEDN0198;MEDL00575;MEDN1387;MEDN0343;MEDN0461	C01005+C00158+C00407+C00979+C00493+C05382	25/314	25/1032	314/10463	0.896023	1	LOC_Os05g49800;LOC_Os09g12290;LOC_Os04g43650;LOC_Os02g38920;LOC_Os01g67860;LOC_Os08g34720;LOC_Os03g63330;LOC_Os03g31690;LOC_Os06g41360;LOC_Os10g25130;LOC_Os04g33390;LOC_Os04g47190;LOC_Os01g49890;LOC_Os03g18130;LOC_Os01g59920;LOC_Os10g25140;LOC_Os03g18120;LOC_Os05g49760;LOC_Os01g52594;LOC_Os09g08130;LOC_Os11g04300;LOC_Os04g32010;LOC_Os05g48200;LOC_Os02g10830;LOC_Os09g02540	K00053+K12524+K01620+K00134+K01623+K00058+K00928+K14682+K00948+K00814+K05359+K00826+K01733+K01953+K22846+K00814+K01953+K00031+K00817+K01609+K15634+K01652+K00264+K00640+K01623	https://www.genome.jp/dbget-bin/www_bget?ko01230
ko00380	Tryptophan metabolism	1/14	1/117	14/427	0.989595	0.989595	MEDP0081	C00780	9/130	9/1032	130/10463	0.905154	1	LOC_Os02g43280;LOC_Os02g49720;LOC_Os04g45720;LOC_Os04g11970;LOC_Os10g26110;LOC_Os07g02120;LOC_Os05g45240;LOC_Os01g36294;LOC_Os08g01510	K00128+K00128+K00128+K22588+K01593+K11816+K11816+K24541+K24541	https://www.genome.jp/dbget-bin/www_bget?ko00380
ko00020	Citrate cycle (TCA cycle)	3/4	3/117	4/427	0.0644715	0.921269	MEDN0198;MEDP0208;MEDN0203	C00158+C00042+C00417	4/67	4/1032	67/10463	0.90787	1	LOC_Os04g02900;LOC_Os06g13720;LOC_Os04g46560;LOC_Os05g49760	K00161+K00161+K00025+K00031	https://www.genome.jp/dbget-bin/www_bget?ko00020
ko00130	Ubiquinone and other terpenoid-quinone biosynthesis	2/8	2/117	8/427	0.692249	0.921269	MEDP0101;MW0061670	C00811+C03313	6/96	6/1032	96/10463	0.921866	1	LOC_Os02g46970;LOC_Os09g28230;LOC_Os01g67540;LOC_Os08g34790;LOC_Os07g17970;LOC_Os01g44950	K01904+K17872+K01904+K01904+K01904+K01904	https://www.genome.jp/dbget-bin/www_bget?ko00130
ko00640	Propanoate metabolism	2/4	2/117	4/427	0.302442	0.921269	MEDP0208;MEDN0325	C00042+C00186	2/41	2/1032	41/10463	0.922726	1	LOC_Os12g20390;LOC_Os06g23780	K00232+K00232	https://www.genome.jp/dbget-bin/www_bget?ko00640
ko00564	Glycerophospholipid metabolism	4/18	4/117	18/427	0.775051	0.921269	MW0011792;MW0141993;MEDP0494;MW0142636	C00350+C20466+C04230+C04590	26/338	26/1032	338/10463	0.93105	1	LOC_Os02g43700;LOC_Os02g37590;LOC_Os03g40670;LOC_Os01g52230;LOC_Os03g50030;LOC_Os12g12260;LOC_Os04g54200;LOC_Os01g47580;LOC_Os01g63580;LOC_Os03g31180;LOC_Os05g47540;LOC_Os01g42690;LOC_Os01g02890;LOC_Os01g22560;LOC_Os08g31060;LOC_Os01g22570;LOC_Os05g38350;LOC_Os01g44069;LOC_Os10g27330;LOC_Os06g40170;LOC_Os03g27370;LOC_Os05g20100;LOC_Os08g08580;LOC_Os04g32320;LOC_Os01g46290;LOC_Os01g46250	K16818+K01126+K01126+K06124+K01047+K00901+K00901+K18693+K13508+K00901+K05929+K06130+K08730+K13508+K01115+K13508+K13508+K13508+K13508+K01115+K01115+K13508+K25193+K18696+K16818+K16818	https://www.genome.jp/dbget-bin/www_bget?ko00564
ko00900	Terpenoid backbone biosynthesis	3/9	3/117	9/427	0.466973	0.921269	MW0103902;MW0052883;MEDN0417	C01107+C00448+C00418	3/63	3/1032	63/10463	0.955361	1	LOC_Os09g34960;LOC_Os03g08624;LOC_Os07g09190	K01641+K15891+K01662	https://www.genome.jp/dbget-bin/www_bget?ko00900
ko00563	Glycosylphosphatidylinositol (GPI)-anchor biosynthesis	1/1	1/117	1/427	0.274005	0.921269	MW0011792	C00350	1/30	1/1032	30/10463	0.955836	1	LOC_Os12g40500	K07541	https://www.genome.jp/dbget-bin/www_bget?ko00563
ko00780	Biotin metabolism	2/3	2/117	3/427	0.183457	0.921269	MW0049160;MEDN0530	C01909+C02656	1/32	1/1032	32/10463	0.964142	1	LOC_Os10g31780	K00059	https://www.genome.jp/dbget-bin/www_bget?ko00780
ko00400	Phenylalanine, tyrosine and tryptophan biosynthesis	3/9	3/117	9/427	0.466973	0.921269	MEDL01892;MEDN0343;MEDN1245	C00587+C00493+C20653	3/68	3/1032	68/10463	0.969744	1	LOC_Os04g33390;LOC_Os01g52594;LOC_Os09g08130	K05359+K00817+K01609	https://www.genome.jp/dbget-bin/www_bget?ko00400
ko01240	Biosynthesis of cofactors	15/53	15/117	53/427	0.495394	0.921269	MEDN0198;MEDP0085;MW0061670;MW0049160;MW0103639;MEDP0457;MEDN0530;MW0151247;MW0103583;MEDTN02215;MEDL02471;MW0143562;MEDN0343;MEDN0419;MEDN1221	C00158+C00483+C03313+C01909+C01103+C00430+C02656+C06399+C00096+C00002+C00016+C04454+C00493+C00105+C00275	29/402	29/1032	402/10463	0.975395	1	LOC_Os11g38810;LOC_Os12g08810;LOC_Os02g36340;LOC_Os03g55070;LOC_Os08g41990;LOC_Os02g04170;LOC_Os10g41930;LOC_Os01g62870;LOC_Os12g25690;LOC_Os02g43280;LOC_Os02g17330;LOC_Os04g47190;LOC_Os01g43020;LOC_Os09g28230;LOC_Os07g43170;LOC_Os02g53790;LOC_Os02g36550;LOC_Os01g12560;LOC_Os03g63490;LOC_Os02g49720;LOC_Os10g31780;LOC_Os09g32670;LOC_Os04g45720;LOC_Os08g41440;LOC_Os01g03710;LOC_Os05g30454;LOC_Os04g…	K01809+K14190+K14652+K00012+K01845+K00278+K20884+K00002+K00012+K00128+K18482+K00826+K01937+K17872+K13800+K13800+K01922+K00606+K01918+K00128+K00059+K08679+K00128+K08679+K01809+K00949+K00103+K13998+K00963	https://www.genome.jp/dbget-bin/www_bget?ko01240
ko04148	Efferocytosis	3/15	3/117	15/427	0.827444	0.921269	MEDTN02215;MEDN0325;MEDP0494	C00002+C00186+C04230	4/88	4/1032	88/10463	0.978864	1	LOC_Os05g49140;LOC_Os03g61670;LOC_Os09g25860;LOC_Os05g43820	K04371+K08057+K20183+K04392	https://www.genome.jp/dbget-bin/www_bget?ko04148
ko04136	Autophagy - other	1/1	1/117	1/427	0.274005	0.921269	MW0011792	C00350	1/47	1/1032	47/10463	0.992493	1	LOC_Os03g02980	K08269	https://www.genome.jp/dbget-bin/www_bget?ko04136
ko00630	Glyoxylate and dicarboxylate metabolism	4/7	4/117	7/427	0.09309	0.921269	MEDN0198;MW0104839;MEDP0208;MEDN0203	C00158+C00988+C00042+C00417	6/133	6/1032	133/10463	0.992789	1	LOC_Os12g08760;LOC_Os03g19250;LOC_Os07g34520;LOC_Os04g40990;LOC_Os03g04130;LOC_Os04g46560	K01637+K01913+K01637+K01638+K01913+K00025	https://www.genome.jp/dbget-bin/www_bget?ko00630
ko00860	Porphyrin metabolism	2/4	2/117	4/427	0.302442	0.921269	MEDP0457;MW0151247	C00430+C06399	2/69	2/1032	69/10463	0.99351	1	LOC_Os08g41990;LOC_Os02g04510	K01845+K19073	https://www.genome.jp/dbget-bin/www_bget?ko00860
ko01200	Carbon metabolism	7/19	7/117	19/427	0.242109	0.921269	MEDL02462;MEDN0198;MW0104839;MEDP0208;MEDN1387;MEDN0461;MW0114218	C01005+C00158+C00988+C00042+C00979+C05382+C01236	24/378	24/1032	378/10463	0.994642	1	LOC_Os12g08760;LOC_Os02g38920;LOC_Os03g19250;LOC_Os01g67860;LOC_Os08g34720;LOC_Os07g34520;LOC_Os03g31750;LOC_Os04g02900;LOC_Os06g41360;LOC_Os10g25130;LOC_Os01g53920;LOC_Os12g20390;LOC_Os04g40990;LOC_Os03g04130;LOC_Os02g38840;LOC_Os06g13720;LOC_Os04g46560;LOC_Os10g25140;LOC_Os05g49760;LOC_Os06g23780;LOC_Os11g04300;LOC_Os02g43470;LOC_Os02g10830;LOC_Os09g02540	K01637+K00134+K01913+K01623+K00058+K01637+K01006+K00161+K00948+K00814+K00844+K00232+K01638+K01913+K00036+K00161+K00025+K00814+K00031+K00232+K15634+K00261+K00640+K01623	https://www.genome.jp/dbget-bin/www_bget?ko01200
ko00970	Aminoacyl-tRNA biosynthesis	2/12	2/117	12/427	0.884957	0.921269	MEDL02462;MEDL00575	C01005+C00407	2/81	2/1032	81/10463	0.997864	1	LOC_Os12g35570;LOC_Os12g22600	K01867+K01893	https://www.genome.jp/dbget-bin/www_bget?ko00970
ko00195	Photosynthesis	1/2	1/117	2/427	0.473398	0.921269	MEDTN02215	C00002	5/146	5/1032	146/10463	0.999163	1	LOC_Os04g33830;LOC_Os08g01380;LOC_Os10g32540;LOC_Os07g05365;LOC_Os07g05360	K14332+K02639+K02717+K03541+K03541	https://www.genome.jp/dbget-bin/www_bget?ko00195
ko00190	Oxidative phosphorylation	2/4	2/117	4/427	0.302442	0.921269	MEDTN02215;MEDP0208	C00002+C00042	4/220	4/1032	220/10463	1	1	LOC_Os02g47600;LOC_Os05g02310;LOC_Os03g48310;LOC_Os05g26660	K01507+K01507+K01535+K03885	https://www.genome.jp/dbget-bin/www_bget?ko00190
ko00960	Tropane, piperidine and pyridine alkaloid biosynthesis	4/11	4/117	11/427	0.353655	0.921269	MW0000243;MEDP0251;MEDL00575;MEDP0823	C12448+C01004+C00407+C05607	5/309	5/1032	309/10463	1	1	LOC_Os11g32650;LOC_Os06g21730;LOC_Os04g22660;LOC_Os07g38440;LOC_Os01g52594	K00660+K08081+K08081+K00276+K00817	https://www.genome.jp/dbget-bin/www_bget?ko00960
