# Supplementary material
Source: Research Square preprint supplement (doi:10.21203/rs.3.rs-9447148/v1)
Supplement: Supplementary file 8 [file ecc76f866105cb5b92605f83.xlsx]

## Sheet: Sheet1
Table S7 DAMs identified between control conditions and salt conditions in root(CK_Root vs. Salt_Root)
Index	Compounds	Class I	Class II	Formula	Level	score	CAS	Salt_Root_1	Salt_Root_2	Salt_Root_3	CK_Root_1	CK_Root_2	CK_Root_3	VIP	P-value	FDR	Fold_Change	Log2FC	Type
MW0111229	Octadecylamine	Alcohol and amines	Amines	C18H39N	2	0.9708	124-30-1	624890	608031	595083	531551	505947	506072	1.36231	0.00144364	0.0129563	1.18427	0.243998	insig
MEDL00392	1-(9Z-octadecenoyl)-sn-glycero-3-phosphocholine	Lipids	LPC	C26H52NO7P	2	0.9481	19420-56-5	1.17597e+06	1.06521e+06	959015	2.38337e+06	2.06258e+06	1.09514e+06	1.00388	0.178572	0.33356	0.57754	-0.792008	insig
MEDN1677	2'-Adenylic acid	Nucleotides and derivatives	Nucleotides and derivatives	C10H14N5O7P	2	0.9467	130-49-4	125548	124828	150545	148770	140457	142810	0.735732	0.344879	0.511401	0.92798	-0.107834	insig
MW0054292	Lauroyl diethanolamide	FA	Others	C16H33NO3	2	0.9387	120-40-1	143872	132671	74910.8	139254	135391	156378	0.700699	0.340404	0.507154	0.815395	-0.29443	insig
MEDL02701	2,4,6-Trihydroxybenzoic acid	Phenolic acids	Phenolic acids	C7H6O5	2	0.9374	83-30-7	2779.96	3322.9	530.54	1638.18	435.43	2314.83	0.319937	0.508887	0.645636	1.51156	0.59604	insig
MW0127974	N-Feruloyl dopamine, trans-	Alkaloids	Alkaloids	C18H19NO5	2	0.9329	142350-99-0	23871.3	37324	39509.2	28495.3	39207.9	45779.8	0.394997	0.576778	0.694614	0.887398	-0.172347	insig
MW0110882	Adrenoyl ethanolamide	Alcohol and amines	Amines	C24H41NO2	2	0.93	150314-35-5	2987.55	4925.2	6342.54	28828.8	30184.7	29493.1	1.36878	0.000387869	0.00618137	0.161065	-2.63429	down
MW0130180	6,7,3',4'-Tetrahydroxyflavone	Flavonoids	Flavones	C15H10O6	2	0.9298	92915-82-7	37238.3	40564.1	20452	68874.2	58572	66963.8	1.20023	0.0198653	0.0711308	0.505397	-0.98451	insig
MW0168897	Ergocalciferol	Others	Vitamin	C28H44O	2	0.9269	50-14-6	17662.7	29879.9	27672	29558.7	15269.5	30954.5	0.036676	0.977444	0.985399	0.992504	-0.0108549	insig
MW0016133	Betamethasone 9,11-Epoxide	Benzene and substituted derivatives	Phenolic acids	C22H28O5	2	0.9263	981-34-0 | 14622-47-0	10880.3	6136.65	4115.2	7087.32	6423.34	5914.51	0.0155671	0.804633	0.86445	1.08788	0.121514	insig
MW0104181	3-Oxoglutaric acid	Organic acids	Organic acids	C5H6O5	2	0.9263	542-05-2	456819	190342	198177	291585	280934	230277	0.0729566	0.887633	0.925438	1.05299	0.0744958	insig
MW0103376	3'-O-Methylguanosine	Nucleotides and derivatives	Nucleotides and derivatives	C11H15N5O5	2	0.9204	10300-27-3	6055.99	17158.4	15571.2	1298.34	1707.01	1978.78	1.32422	0.0825713	0.192444	7.78183	2.96011	up
MW0144984	Alpha-Maltose	Others	Saccharides	C12H22O11	2	0.9156	9005-84-9	627217	651410	735793	1.11434e+06	1.21951e+06	1.16332e+06	1.37977	0.000396693	0.00619524	0.576014	-0.795823	insig
MW0054460	Lutein	Others	Vitamin	C40H56O2	2	0.9142	127-40-2	961.05	2493.67	15133.4	22589.4	15646.8	174499	1.05049	0.337969	0.504887	0.0873766	-3.51661	down
MW0000275	Harman	Alkaloids	Alkaloids	C12H10N2	2	0.914	486-84-0	3679.77	5131.57	1125.36	26855.4	8885.84	8414.28	1.10698	0.19748	0.355464	0.225039	-2.15175	down
MW0114649	Isomaltose	Others	Saccharides	C12H22O11	2	0.9127	499-40-1	28851.3	33026.2	32336.7	15424.2	31878.2	36433	0.448147	0.64168	0.748194	1.12514	0.170106	insig
MW0111826	1-Kestose	Others	Saccharides	C18H32O16	2	0.9114	470-69-9	836002	784312	805302	281347	211330	186363	1.38131	0.000342832	0.00593261	3.57213	1.83678	up
MW0168272	Oxycanthine	Lignans and Coumarins	Lignans	C37H40N2O6	2	0.9065	548-40-3	760.1	1624.02	182.95	1938.35	2344.4	99076.1	0.931209	0.40764	0.56637	0.0248365	-5.3314	insig
MW0054371	Linoelaidic acid	Lipids	Free fatty acids	C18H32O2	2	0.906	506-21-8	82121.6	89029.1	94148.2	148633	131495	130565	1.3602	0.00438591	0.0261597	0.64598	-0.630439	insig
MW0130165	5,7,3',4'-Tetrahydroxy-6,8-dimethoxyflavone	Flavonoids	Flavones	C17H14O8	2	0.9031	57093-50-2	5556.75	4486.69	5018.54	5032.01	3929.4	223.12	0.682949	0.309027	0.476732	1.63993	0.713634	insig
MEDN0838	N-Methyl-D-aspartic acid	Amino acids and derivatives	Amino acids and derivatives	C5H9NO4	2	0.9008	6384-92-5	205751	188287	242614	426724	344529	325500	1.30262	0.0220173	0.07594	0.580488	-0.784661	insig
MW0014451	4-Dihydroboldenone	Others	Ketone compounds	C19H28O2	2	0.8991	10529-96-1	19128.1	16363.2	18198.6	1117.76	655.92	18771.9	0.976987	0.203268	0.361365	2.6132	1.38582	insig
MW0005951	Acetyleugenol	Phenolic acids	Phenolic acids	C12H14O3	2	0.8987	93-28-7	134.01	893.3	27.18	14708.1	772.41	114.16	0.702281	0.415632	0.572737	0.0676187	-3.88643	insig
MW0005300	4-Phenyl-2-butanol	Benzene and substituted derivatives	Benzene and substituted derivatives	C10H14O	2	0.8971	2344-70-9	341006	336554	357473	407416	378741	408981	1.29185	0.0147776	0.0583579	0.866036	-0.2075	insig
MW0149263	Levoleucovorin	Organic acids	Organic acids	C20H23N7O7	2	0.896	68538-85-2 | 58-05-9	1.14112e+06	1.14816e+06	1.19947e+06	1.25055e+06	1.24401e+06	1.21936e+06	1.22891	0.036163	0.107529	0.939373	-0.0902294	insig
MEDP0338	LysoPC 16:0	Lipids	LPC	C24H50NO7P	2	0.8892	17364-16-8	144184	146299	136979	512947	602690	574293	1.40267	0.00361834	0.0231942	0.252947	-1.98309	down
MW0006042	2-Hydroxy-6-pentadecylbenzoic acid	Benzene and substituted derivatives	Benzene and substituted derivatives	C22H36O3	2	0.8889	16611-84-0	3463.01	129.97	177.79	910.77	4116.54	620.64	0.598842	0.710948	0.797369	0.667635	-0.582868	insig
MW0053722	Glycerol trihexanoate	GL	TG	C21H38O6	2	0.887	621-70-5	60529.3	38338.1	35777.8	8781.49	10763	11789.9	1.36172	0.0467481	0.127356	4.29704	2.10334	up
MW0014506	4-Hydroxyretinoic acid	Organic acids	Organic acids	C20H28O3	2	0.8864	66592-72-1	229.56	1272.7	14.23	29635.6	43900.3	55167.4	1.27017	0.0287579	0.0917341	0.0117828	-6.40717	down
MW0115743	11-Hydroxytetrahydrocannabinol	Others	Others	C21H30O3	2	0.8828	36557-05-8	226.8	515.36	19.57	73178.1	64437.7	69407.8	1.34219	0.00131125	0.0122101	0.00367944	-8.0863	down
MW0130967	Koparin	Others	Ketone compounds	C16H12O6	2	0.8793	65048-75-1	5925.98	14746.7	8551.7	13661.4	13087.7	14857.7	0.871764	0.252749	0.41939	0.702395	-0.509646	insig
MEDN0851	Indolepyruvate	Organic acids	Organic acids	C11H9NO3	2	0.8786	392-12-1	27484.8	27304.7	21709.1	19646.6	16490.8	11008.5	1.128	0.0400603	0.115213	1.6226	0.698303	insig
MW0103561	Flavin mononucleotide	Nucleotides and derivatives	Nucleotides and derivatives	C17H21N4O9P	2	0.8782	146-17-8	3434.36	5380.39	3716.92	3777.37	3441.36	4048.91	0.408966	0.564879	0.685608	1.11218	0.153393	insig
MW0052460	Docosatrienoic acid	Lipids	Free fatty acids	C22H38O2	2	0.8777	28845-86-5	53707.8	82566.2	95307.3	443811	513704	373999	1.37361	0.00751788	0.0370564	0.173923	-2.52348	down
MW0014995	6beta-Hydroxymethandrostenolone	Others	Ketone compounds	C20H28O3	2	0.8727	33526-41-9	6821.23	317.38	109.04	2663.33	1548.49	1014.14	0.497332	0.791144	0.855888	1.38686	0.471817	insig
Lmhp002001	Val-Phe	Amino acids and derivatives	Amino acids and derivatives	C14H20N2O3	2	0.8717	3918-92-1	22537	17349.4	22902	72753.3	78505.9	89745.9	1.3887	0.0033151	0.0219082	0.260527	-1.94049	down
MW0014839	5(S)-Hydroperoxyeicosatetraenoic acid	Lipids	Free fatty acids	C20H32O4	2	0.8689	71774-08-8	58202.9	70605.7	85743.8	141287	149735	92904.6	1.17747	0.068161	0.168501	0.558836	-0.839502	insig
MW0153776	Met-His	Amino acids and derivatives	Amino acids and derivatives	C11H18N4O3S	2	0.8553	14486-12-5	250.29	2813.08	2583.56	176.5	860.13	122.87	0.858351	0.203079	0.361188	4.87014	2.28396	insig
MW0149468	Ganoderic acid H	Lipids	Free fatty acids	C32H44O9	2	0.8549	98665-19-1	6205.88	403.39	202.03	119.21	115.16	3448.21	0.350151	0.674445	0.771632	1.8496	0.887213	insig
MW0136963	7-Ethoxy-4-methylcoumarin	Benzene and substituted derivatives	Benzene and substituted derivatives	C12H12O3	2	0.8543	87-05-8	545493	537584	547658	982942	1.03948e+06	952191	1.40142	0.00289684	0.0200689	0.548218	-0.867177	insig
MW0011597	(R)-ar-Turmerone	Others	Ketone compounds	C15H20O	2	0.8541	532-65-0	99.12	73.83	160.5	101.19	216.85	4194.75	0.746578	0.409316	0.567236	0.07389	-3.75848	insig
MW0112859	3-Methyl-1-(2,4,6-trihydroxyphenyl)-1-butanone	Others	Ketone compounds	C11H14O4	2	0.8492	26103-97-9	321199	266042	318667	403426	392701	415048	1.29129	0.020099	0.0713506	0.747958	-0.418971	insig
Zmhn002301	4-O-beta-D-glucosyl-4-coumaric acid	Organic acids	Organic acids	C15H18O8	2	0.8491	14364-05-7	25440.8	44460.8	46181.1	65236	51692.2	53644.7	0.997727	0.0942446	0.212492	0.680546	-0.555235	insig
MW0000973	Gingerol	Phenolic acids	Phenolic acids	C17H26O4	2	0.8426	23513-14-6 | 1391-73-7	12986.5	12050.6	12720.6	133.61	371.83	7123.9	1.08428	0.0464748	0.127064	4.94901	2.30714	up
MW0137821	Cyanidin 3-sambubioside 5-glucoside	Flavonoids	Anthocyanidins	C32H39O20+	2	0.8376	73036-94-9	139.31	16.59	67.71	42.32	79.05	226.82	0.442013	0.572985	0.691699	0.642207	-0.63889	insig
MW0126137	Picrotin	Heterocyclic compounds	Heterocyclic compounds	C15H18O7	2	0.8276	21416-53-5	298.31	5369.17	5530.58	87.76	2595.8	3821.43	0.344398	0.492739	0.633329	1.72146	0.78363	insig
MW0000241	3-Hydroxy-8-methyl-8-azabicyclo[3.2.1]octane-2-carboxylic acid	Alkaloids	Tropan alkaloids	C9H15NO3	2	0.8271	481-37-8	54.14	1070	65.69	25.02	123.91	84.21	0.539686	0.443724	0.590655	5.1035	2.35149	insig
MEDP2286	Celastrol	Benzene and substituted derivatives	Benzene and substituted derivatives	C29H38O4	2	0.8234	34157-83-0	291.97	900.69	1082.53	357.74	731.09	1972.18	0.212594	0.663715	0.763727	0.743281	-0.428021	insig
MEDTN00717	4-Oxoretinoic acid	Organic acids	Organic acids	C20H26O3	2	0.8224	64907-22-8	3458.74	15192.3	2454.2	114116	64057.6	74455.8	1.29679	0.0299526	0.0937646	0.0835421	-3.58135	down
MW0009433	Phenyltoloxamine	Benzene and substituted derivatives	Benzene and substituted derivatives	C17H21NO	2	0.819	92-12-6	95.41	177.87	203.09	13946.4	10545.7	11243.3	1.39779	0.0076493	0.0374751	0.0133305	-6.22913	down
MW0125248	Myristicin	Lignans and Coumarins	Lignans	C11H12O3	2	0.8123	607-91-0	177391	187897	188048	211825	205628	229614	1.26261	0.031562	0.0969955	0.855145	-0.225758	insig
MW0055023	alpha-Glyceryl linoleate	GL	MG	C21H38O4	2	0.8079	67968-46-1	45741	493380	349957	178513	460673	337033	0.357642	0.862345	0.906879	0.910736	-0.134895	insig
MW0115022	Nigerose	Others	Saccharides	C12H22O11	2	0.8048	497-48-3	337289	392526	482904	12038.4	14810.8	56917.1	1.33174	0.00718645	0.0359947	14.4774	3.85573	up
MW0056883	Colfosceril palmitate	GP	PC	C40H80NO8P	2	0.799	63-89-8	266626	363463	286728	25311.3	25802.7	30110.6	1.40126	0.0108767	0.0472575	11.2874	3.49665	up
MW0132722	Rhamnazin	Flavonoids	Flavonols	C17H14O7	2	0.7986	552-54-5	3033.83	3446.04	4379.06	2339.06	1613.48	2991	1.04761	0.0811855	0.189872	1.56389	0.645139	insig
MW0054123	Isopimaric acid	Terpenoids	Ditepenoids	C20H30O2	2	0.7889	5835-26-7	68.36	172.41	257.54	497.89	218.14	205.67	0.795742	0.284721	0.452679	0.540642	-0.887254	insig
MW0107840	Leucylproline	Amino acids and derivatives	Amino acids and derivatives	C11H20N2O3	2	0.7871	6403-35-6	325824	329565	349192	593340	520186	586852	1.38464	0.0060528	0.0321513	0.590799	-0.759261	insig
MW0109739	S-nitrosoglutathione	Amino acids and derivatives	Amino acids and derivatives	C10H16N4O7S	2	0.7867	57564-91-7	16.83	552.53	593.92	714.98	602.56	925.84	0.725912	0.183632	0.340288	0.518539	-0.947476	insig
MW0104699	Spermidic acid	Organic acids	Organic acids	C7H13NO4	2	0.7856	4386-03-2	2933.47	1062.29	3693.86	5413.33	1510.04	1204.06	0.0588838	0.931215	0.956845	0.946132	-0.0798869	insig
MW0014140	2-Hydroxy-3-isopropylsuccinic acid	Organic acids	Organic acids	C7H12O5	2	0.7819	16048-89-8	11704.9	13018.3	3094.32	23480.8	22738.8	24364.5	1.07908	0.0418013	0.11859	0.394104	-1.34335	down
MW0015857	Methyl arachidonate	FA	Others	C21H34O2	2	0.7812	2566-89-4	83.5	34.85	2506.34	1739.53	1672.75	95.18	0.493296	0.780463	0.848038	0.748316	-0.41828	insig
MW0061067	Perillaldehyde	Heterocyclic compounds	Heterocyclic compounds	C10H14O	2	0.7812	2111-75-3	3695	2538.88	2805.26	5414.23	2664.89	5235.3	0.795709	0.245359	0.410664	0.678899	-0.558732	insig
MEDP2104	3-Aminoquinoline	Heterocyclic compounds	Heterocyclic compounds	C9H8N2	2	0.7811	580-17-6	39830.9	40821.8	41550.9	27211.6	28162.3	26007.8	1.39536	9.64172e-05	0.00277045	1.50161	0.58651	insig
MW0011930	1,2-Dimyristoyl-sn-glycero-3-phosphocholine	GP	PC	C36H72NO8P	2	0.781	18194-24-6	1532.98	3513.45	11594.2	1439.98	2863.49	2549.28	0.605291	0.400316	0.560372	2.42831	1.27995	insig
MW0106984	Glutaconic acid	Organic acids	Organic acids	C5H6O4	2	0.7808	1724-02-3	12789.5	31062	24058.3	4301.8	1745.42	3077.81	1.31869	0.0639079	0.160646	7.44215	2.89572	up
MW0055340	N-(9Z-octadecenoyl)-sphing-4-enine-1-phosphocholine	SL	SM	C41H81N2O6P	2	0.7797	108392-10-5	4176.55	3119.82	204.53	445.83	947.12	1330.33	0.349205	0.310714	0.478147	2.75436	1.46172	insig
MW0130123	Dihydroquercetin	Others	Ketone compounds	C15H12O7	2	0.7795	98006-93-0 | 215257-15-1 | 5117-01-1	15505	122.53	15998.6	8981.54	6045.7	237.48	0.0998992	0.41894	0.574156	2.07184	1.05091	insig
mws0895	Genistin	Flavonoids	Isoflavones	C21H20O10	2	0.7788	529-59-9	96.7	1016.17	442.17	1279.27	1108.34	1366.08	0.949372	0.102479	0.226656	0.41427	-1.27136	insig
MEDL02176	6-Methylcoumarin	Lignans and Coumarins	Coumarins	C10H8O2	2	0.7784	92-48-8	235938	237526	232775	311831	286417	280395	1.3467	0.0249672	0.0831277	0.803784	-0.31512	insig
MW0116509	1-(Hydroxymethyl)-5,5-dimethyl-2,4-imidazolidinedione	Others	Ketone compounds	C6H10N2O3	2	0.7773	116-25-6	53176.2	91396.8	42274	69415.4	67923.1	49212.1	0.112169	0.995563	0.996728	1.00159	0.0022914	insig
MW0107946	Prolylproline	Amino acids and derivatives	Amino acids and derivatives	C10H16N2O3	2	0.7771	20488-28-2 | 99265-53-9	56790.7	72289	84629.9	62190.4	73478.6	79473.6	0.0742336	0.962795	0.977831	0.99334	-0.00964103	insig
MEDTP02665	2-Aminoheptanedioic acid	Organic acids	Organic acids	C7H13NO4	2	0.777	3721-85-5	4114.21	3980.83	3275.95	9720.98	3855.2	4409.24	0.752422	0.35939	0.524642	0.632234	-0.66147	insig
MW0124226	Garcinone D	Flavonoids	Other Flavonoids	C24H28O7	2	0.7765	107390-08-9	19897.6	38571.3	34316.6	2192.36	2189.37	173.01	1.25589	0.03343	0.101346	20.3712	4.34846	up
MEDN0657	D-Xylulose 5-phosphate	Others	Saccharides	C5H11O8P	2	0.7764	4212-65-1	46849.3	39666.7	34887.8	59256.1	47065.1	54006.7	1.11455	0.0588929	0.15115	0.757222	-0.401212	insig
MW0052734	Ethyl octanoate	Others	Lactones	C10H20O2	2	0.7759	106-32-1	10186.4	9833.85	8875.57	14466.9	10584.3	685.65	0.483812	0.821834	0.877785	1.12274	0.167027	insig
MW0130831	Flavokawain b	Flavonoids	Chalcones	C17H16O4	2	0.7756	1775-97-9	16717.1	31989.9	9901.95	19771.2	19804	28520.8	0.458451	0.690555	0.782992	0.860681	-0.21645	insig
MW0124466	Isoeugenitol	Heterocyclic compounds	Heterocyclic compounds	C11H10O4	2	0.7749	479-06-1	130758	138929	140424	239457	247452	244701	1.40178	1.57857e-05	0.001224	0.560559	-0.835061	insig
MW0106445	Dihydromethysticin	Benzene and substituted derivatives	Benzene and substituted derivatives	C15H16O5	2	0.7741	19902-91-1	49580.6	65833	69006.2	73888.4	61710.8	71105.6	0.648458	0.362984	0.527597	0.892189	-0.164578	insig
MW0112702	3',4'-Dimethoxyacetophenone	Others	Ketone compounds	C10H12O3	2	0.7736	1131-62-0	68099	66999.5	68197.4	84185.9	82574.7	84265.7	1.40209	4.65984e-05	0.00194168	0.809859	-0.304258	insig
MW0000731	(4-Hydroxy-3-methoxyphenyl)ethanol	Phenolic acids	Phenolic acids	C9H12O3	2	0.7729	2380-78-1	108376	103950	112975	4254.62	5819	1165.45	1.35572	4.58482e-05	0.00194168	28.9437	4.85518	up
MW0006078	Benzyl alcohol	Benzene and substituted derivatives	Benzene and substituted derivatives	C7H8O	2	0.7713	100-51-6	330040	370202	381252	328828	367572	353317	0.361354	0.613826	0.725791	1.03027	0.0430261	insig
MW0105204	4-Carboxyphenylglycine	Amino acids and derivatives	Amino acids and derivatives	C9H9NO4	2	0.7706	7292-81-1	22757.9	23784	19517.9	28179.2	29258.8	25870.4	1.20721	0.0266804	0.0870196	0.792956	-0.334688	insig
MEDP1775	Lipoamide	Alcohol and amines	Amines	C8H15NOS2	2	0.7695	940-69-2	46844.2	47578.5	51037	69711.9	68364.9	68943.2	1.3907	0.00207299	0.0166624	0.702636	-0.509151	insig
MW0106308	Cystathionine	Amino acids and derivatives	Amino acids and derivatives	C7H14N2O4S	2	0.7689	61135-95-3	297.45	537.75	490.61	479.12	430.46	1792.18	0.650583	0.412324	0.569151	0.490721	-1.02703	insig
MW0135191	6',7'-Dihydroxybergamottin	Lignans and Coumarins	Coumarins	C21H24O6	2	0.7689	145414-76-2 | 71339-34-9	12025.2	12328.3	13640.1	22633.7	16477.5	18971	1.27035	0.0555527	0.145164	0.654137	-0.612335	insig
MW0124675	Limonene-1,2-epoxide	Others	Ketone compounds	C10H16O	2	0.7688	203719-54-4	883783	990112	1.0515e+06	1.02625e+06	1.0087e+06	342107	0.558836	0.504557	0.641556	1.23067	0.299448	insig
MW0013469	3-Carboxy-4-methyl-5-propyl-2-furanpropionic acid	Organic acids	Organic acids	C12H16O5	2	0.7686	86879-39-2	81260.5	156668	52307.2	139427	145180	144869	0.861283	0.273964	0.44183	0.67579	-0.565352	insig
MEDN1036	Hydroxytyrosol	Phenolic acids	Phenolic acids	C8H10O3	2	0.7675	10597-60-1	233496	251055	246313	295633	243412	275377	0.923053	0.200964	0.359604	0.897402	-0.156174	insig
MEDP1554	Ethyl salicylate	Phenolic acids	Phenolic acids	C9H10O3	2	0.7671	118-61-6	103736	112249	105216	10633.2	7482.58	55159.4	1.17646	0.0299996	0.0938388	4.38348	2.13208	up
MW0105748	Arg-Ser	Amino acids and derivatives	Amino acids and derivatives	C9H19N5O4	2	0.7669	70921-62-9	513.93	177.91	684.07	584.57	842.99	1658.02	0.903132	0.213815	0.374013	0.445916	-1.16516	insig
MW0056747	Palmitoyl Serinol	Lipids	Free fatty acids	C19H39NO3	2	0.7632	126127-31-9	823033	754005	774117	464755	460927	469779	1.39948	0.0036687	0.0234054	1.68486	0.752626	insig
MEDP1015	5,6-Dihydroxyindole-2-carboxylic acid	Alkaloids	Plumerane	C9H7NO4	2	0.7631	4790-08-3	1583.66	1813.12	1158.97	196.72	197.93	628.87	1.25926	0.00963288	0.0433964	4.45106	2.15415	up
MW0137551	Caffeyl alcohol	Phenolic acids	Phenolic acids	C9H10O3	2	0.7631	3598-26-3 | 272785-02-1	56926.2	57790	47881.5	49257.5	41069	44429.6	1.06762	0.0842377	0.195756	1.20661	0.270957	insig
MW0110241	Tyr-Asp	Amino acids and derivatives	Amino acids and derivatives	C13H16N2O6	2	0.7628	87085-11-8	20848.3	11654.1	20594	12179.7	4353.96	11730.3	0.938213	0.106056	0.232779	1.87859	0.90965	insig
MEDL00355	Glu-Tyr	Amino acids and derivatives	Amino acids and derivatives	C14H18N2O6	2	0.7622	3422-39-7	159840	167974	164968	90130	92345	90942.6	1.40475	0.000510477	0.00740375	1.8023	0.849841	insig
MW0148113	Cys-Tyr	Amino acids and derivatives	Amino acids and derivatives	C12H16N2O4S	2	0.7621	1089-23-2	412.06	80.9	233.08	270.77	54.86	203.64	0.313438	0.603228	0.717256	1.37178	0.456045	insig
MW0105414	Acetoacetic acid	Organic acids	Organic acids	C4H6O3	2	0.7617	541-50-4	315662	307266	301595	294708	334659	306828	0.196731	0.780182	0.848038	0.987533	-0.0180994	insig
MEDN1016	Aminohippuric acid	Amino acids and derivatives	Amino acids and derivatives	C9H10N2O3	2	0.7614	61-78-9	3712.97	2473.53	2367.34	4559.55	3106.53	1842	0.144029	0.745337	0.822892	0.899639	-0.152582	insig
MW0005020	Hydroxymethyltolbutamide	Benzene and substituted derivatives	Benzene and substituted derivatives	C12H18N2O4S	2	0.7614	1185112-19-9	540.87	470.84	56.84	650.74	405.09	41.99	0.0550123	0.968591	0.979277	0.973338	-0.0389871	insig
MW0168536	2-Tridecenal	Others	Others	C13H24O	2	0.7604	7774-82-5	66707	332082	729767	16591.5	651633	3545.73	0.718058	0.625139	0.7355	1.67997	0.748438	insig
MW0120587	Isomyristicin	Benzene and substituted derivatives	Benzene and substituted derivatives	C11H12O3	2	0.7603	487-62-7	41502	54409.2	49551.4	87190	87535.8	86940.4	1.35874	0.0091975	0.0420375	0.555909	-0.84708	insig
MW0115025	Oxoamide	Alcohol and amines	Amines	C10H12N2O2	2	0.7596	713-05-3	591.82	1676.14	807.83	601.14	1011.49	1258.92	0.0299897	0.869521	0.911572	1.07113	0.0991273	insig
MW0106675	Ethyl N-acetyl-L-tyrosinate	Amino acids and derivatives	Amino acids and derivatives	C13H17NO4	2	0.7592	840-97-1	11346	4656.29	8524.42	19066.4	10524	16147.9	1.01434	0.0937652	0.212037	0.53624	-0.899051	insig
MEDN0493	4-Methoxycinnamic acid	Phenolic acids	Phenolic acids	C10H10O3	2	0.759	943-89-5	48753.8	49809.2	48686.4	34867.2	30367.7	32310.2	1.38003	0.00376165	0.02381	1.50955	0.594119	insig
MW0126336	Pyridoxamine phosphate	Organic acids	Organic acids	C8H13N2O5P	2	0.7584	529-96-4	21164.2	17435.2	24681.2	12077.1	6302.99	7782.58	1.26996	0.0112328	0.0483411	2.41874	1.27425	up
MW0002024	2-(Ethylsulfinylmethyl)phenyl methylcarbamate	Benzene and substituted derivatives	Benzene and substituted derivatives	C11H15NO3S	2	0.758	53380-22-6	12.87	18.81	39.46	16.25	26.59	38.25	0.303011	0.763571	0.838203	0.877297	-0.188863	insig
MEDN0364	1-Octadecanoyl-sn-glycero-3-phosphoethanolamine	Lipids	LPE	C23H48NO7P	2	0.7573	69747-55-3	2083.37	4001.65	5587.46	8752.21	570.39	7183.14	0.0653608	0.598525	0.712715	0.707177	-0.499857	insig
MW0107035	Glutethimide	Alcohol and amines	Amines	C13H15NO2	2	0.7571	77-21-4	175441	26701.4	170310	292561	249035	433710	0.970188	0.0543481	0.142664	0.381883	-1.3888	insig
MW0105643	N-arachidonoylglycine	Amino acids and derivatives	Amino acids and derivatives	C22H35NO3	2	0.7558	179113-91-8	284.72	1521.64	193.91	103.91	239.7	234.51	0.762811	0.383609	0.546348	3.45996	1.79075	insig
MW0159299	Val-trp	Amino acids and derivatives	Amino acids and derivatives	C16H21N3O3	2	0.7555	24587-37-9	29017.4	31519.4	34106.7	25061.5	28663.1	28196.3	1.06002	0.088446	0.203315	1.1553	0.208272	insig
MW0112074	2-Aminoacetophenone	Others	Ketone compounds	C8H9NO	2	0.7555	613-89-8	6038.2	6753.39	5670.96	67021.4	66052.4	59031.8	1.40467	0.00163727	0.0139862	0.0961063	-3.37923	down
MW0106958	Glu-Gly	Amino acids and derivatives	Amino acids and derivatives	C7H12N2O5	2	0.7551	13716-89-7	1160.1	1032.94	2382.88	473.46	272.67	31.16	1.10003	0.0883922	0.203307	5.88702	2.55754	up
MEDN0232	Rhamnose	Others	Saccharides	C6H12O5	2	0.7546	3615-41-6	6022.4	7628.89	5608.34	11773.4	14657.7	11536.9	1.32606	0.0101023	0.0446572	0.507259	-0.979205	insig
MW0013395	1-hexadecanoyl-2-(5Z,8Z,11Z,14Z-eicosatetraenoyl)-sn-glycero-3-phosphoethanolamine	GP	PE	C41H74NO8P	2	0.7539	70812-59-8	31523.7	38263.8	75907.7	25795.7	23248.2	21239.5	1.08326	0.209397	0.368943	2.07297	1.0517	up
MEDP0362	D-(+)-Neopterin	Alkaloids	Alkaloids	C9H11N5O4	2	0.7535	2009-64-5	237.34	262	200.14	176.78	893.19	325.01	0.620697	0.399604	0.55964	0.501427	-0.99589	insig
MEDN1110	1,11-Undecanedicarboxylic acid	Lipids	Free fatty acids	C13H24O4	2	0.7534	505-52-2	94157.9	89319	92815.7	50355.7	49635	44584.7	1.39524	6.60781e-05	0.00235273	1.91106	0.934375	insig
MEDP2294	Steviol	Terpenoids	Ditepenoids	C20H30O3	2	0.7532	471-80-7	23064.3	22860.6	21698	2586.72	2434.29	2641.12	1.4062	0.000353751	0.00597772	8.8256	3.14169	up
MW0106196	Cyanuric acid	Organic acids	Organic acids	C3H3N3O3	2	0.7521	108-80-5	114584	272161	59005.3	378811	412818	398625	1.12259	0.0571403	0.148161	0.3745	-1.41696	down
MW0052877	2-trans,6-trans-Farnesal	Others	Aldehyde compounds	C15H24O	2	0.7512	502-67-0	6.3	6.3	6.3	1459.32	468.51	1348.32	1.39232	0.0741729	0.178529	0.00576897	-7.43747	down
MW0016414	Carvyl acetate	Terpenoids	Monoterpenoids	C12H18O2	2	0.751	97-42-7	970.92	1270.68	589.08	2716.68	2590.83	1638.07	1.206	0.0359311	0.106997	0.407551	-1.29495	down
MW0054299	L-canavanine	Amino acids and derivatives	Amino acids and derivatives	C5H12N4O3	2	0.7506	543-38-4	106322	81090.1	105640	132312	127327	122383	1.16596	0.0575052	0.14883	0.767107	-0.3825	insig
MW0103535	2',3'-Dideoxyinosine	Nucleotides and derivatives	Nucleotides and derivatives	C10H12N4O3	2	0.7504	69655-05-6	67.5	4226.89	80.15	4820.14	7887.4	8304.75	1.06748	0.0374108	0.110142	0.20819	-2.26403	down
MEDL02462	Phosphoserine	Amino acids and derivatives	Amino acids and derivatives	C3H8NO6P	2	0.7489	407-41-0	2503.48	1457.69	1667.48	7302.71	4417.98	4178.87	1.2759	0.0648841	0.162492	0.354013	-1.49813	down
MW0106869	L-Glutaminyl-L-serine	Amino acids and derivatives	Amino acids and derivatives	C8H15N3O5	2	0.7486	5875-40-1	13043.9	11346.7	30.11	5913.38	6147.38	5300.18	0.421381	0.622948	0.733779	1.40665	0.492259	insig
MW0106942	Glutamylasparagine	Amino acids and derivatives	Amino acids and derivatives	C9H15N3O6	2	0.747	36314-37-1	131497	130117	125898	89492.3	82214.7	75832.2	1.37346	0.00261153	0.0190635	1.56546	0.646583	insig
MW0006047	Anethole	Phenolic acids	Phenolic acids	C10H12O	2	0.7468	4180-23-8 | 104-46-1 | 26795-32-4	117.1	60.28	66.21	115.91	131.28	188.62	1.07768	0.090878	0.207639	0.558936	-0.839244	insig
MW0009376	Phenelzine	Benzene and substituted derivatives	Benzene and substituted derivatives	C8H12N2	2	0.7466	51-71-8	556.12	250.16	115.62	450.6	62.37	244.25	0.263529	0.765844	0.839327	1.21748	0.283898	insig
MW0103675	Thymidine-5'-phosphate	Nucleotides and derivatives	Nucleotides and derivatives	C10H15N2O8P	2	0.7452	365-07-1	230073	700744	848907	1.68551e+06	1.76819e+06	1.79756e+06	1.17007	0.0221519	0.0760787	0.338913	-1.56101	down
MW0011680	cis-4-Decen-1-ol	Alcohol and amines	Alcohols	C10H20O	2	0.7444	57074-37-0	55655	56414.9	51168.1	79609	72780.1	79690.9	1.36704	0.00186548	0.0152805	0.70337	-0.507644	insig
MEDN1876	Vanylglycol	Benzene and substituted derivatives	Benzene and substituted derivatives	C9H12O4	2	0.744	534-82-7	8490.97	10550	13237.9	67.49	231.22	224.57	1.37976	0.016326	0.0625132	61.6857	5.94686	up
MW0054219	2-alpha-D-glucosyl-D-glucose	Others	Saccharides	C12H22O11	2	0.7439	2864-54-2	7890.87	1624.82	2542.69	2596.44	2119.93	3215.2	0.288154	0.555796	0.679711	1.5203	0.604358	insig
MW0013397	MG(0:0/20:4(5Z,8Z,11Z,14Z)/0:0)	GL	MG	C23H38O4	2	0.7433	53847-30-6	774.48	144.91	156.51	326.16	177.87	69.2	0.459878	0.513052	0.648169	1.87691	0.908358	insig
MW0139227	Oxyresveratrol	Heterocyclic compounds	Heterocyclic compounds	C14H12O4	2	0.743	29700-22-9 | 4721-07-7	43027.7	36806.5	37753.8	62810.4	64320.8	60827	1.37508	0.0016821	0.0142784	0.625607	-0.676671	insig
MW0119658	3-Isomangostin	Flavonoids	Other Flavonoids	C24H26O6	2	0.7422	19275-46-8	323.39	121.29	27.92	396.59	386.82	540.69	0.995967	0.0620495	0.157052	0.356922	-1.48632	insig
MW0107238	Methyl hippurate	Others	Lactones	C10H11NO3	2	0.7411	1205-08-9	19971.3	22684.6	15844.1	21122.8	16859.1	3569.41	0.635368	0.402258	0.561656	1.4079	0.493543	insig
MW0000184	Cinchonine	Alkaloids	Alkaloids	C19H22N2O	2	0.7411	118-10-5	5499.77	177.26	9543.61	12736.1	55175.5	49218.6	1.00805	0.119293	0.252223	0.129946	-2.94401	down
MW0114000	beta-L-fucose 1-phosphate	Organic acids	Organic acids	C6H13O8P	2	0.741	16562-59-7	51577.6	65458.1	38451.7	184028	226170	224089	1.36908	0.00161594	0.0138627	0.245137	-2.02834	down
MEDN1388	Sedoheptulose	Others	Saccharides	C7H14O7	2	0.7403	3019-74-7	88266.7	83634.7	88885.4	76274.1	49441	54635.5	1.15879	0.0770916	0.182754	1.446	0.532066	insig
MEDN0038	Oxiglutatione	Amino acids and derivatives	Amino acids and derivatives	C20H32N6O12S2	2	0.7399	27025-41-8	33.18	686.34	147.16	121.43	316.24	491.83	0.400362	0.932554	0.957977	0.932415	-0.100955	insig
MW0007471	Labetalol	Benzene and substituted derivatives	Benzene and substituted derivatives	C19H24N2O3	2	0.7398	36894-69-6 | 32780-40-8	31464.4	28202.7	26065.5	36547	27419.9	29313.9	0.511382	0.485649	0.627608	0.91908	-0.121737	insig
MEDP1830	Ethyl p-methoxycinnamate	Phenolic acids	Phenolic acids	C12H14O3	2	0.7348	24393-56-4	4763.46	9364.89	11097	12532.1	15832.3	11393.5	0.949918	0.112019	0.242307	0.634476	-0.656363	insig
MW0138975	mollicellin H	Heterocyclic compounds	Heterocyclic compounds	C21H20O6	2	0.7344	68455-09-4	28780.8	23077.5	25088.4	6634.07	4429.3	4616.42	1.38438	0.00242801	0.0181627	4.90738	2.29495	up
MW0106579	Edetic acid	Organic acids	Organic acids	C10H16N2O8	2	0.7329	62-33-9	1357.57	1904.73	2594.82	1792.47	302.32	43.71	0.918757	0.141237	0.285154	2.73889	1.45359	insig
MW0014501	4-Hydroxynonenal	Organic acids	Organic acids	C9H16O2	2	0.7325	75899-68-2	3485.02	2450.51	2948.07	19442.9	14850	24249.7	1.38313	0.024682	0.0823141	0.151746	-2.72027	down
MW0115792	2-(1-methyl-1H-imidazol-4-yl)acetic acid	Organic acids	Organic acids	C6H8N2O2	2	0.7323	2625-49-2	41617.2	619	748.88	19690.2	33546.6	37158.5	0.91733	0.370547	0.53416	0.475523	-1.07241	insig
MW0114697	Lacto-N-fucopentoase-3	Others	Saccharides	C32H55NO25	2	0.7314	25541-09-7	11357.1	5049.2	7420.94	8823.3	9328.91	6879.8	0.26199	0.854249	0.901669	0.951872	-0.0711611	insig
MW0000243	Ecgonine methyl ester	Alkaloids	Tropan alkaloids	C10H17NO3	2	0.7294	7143-09-1	6932.24	10591.2	7404.22	15536.2	14229.8	14051.4	1.27506	0.0198995	0.0711308	0.568899	-0.813755	insig
MW0063802	Tetradecanal	FA	Others	C14H28O	2	0.729	124-25-4	180487	190694	195908	98864.5	98821.5	96045	1.40244	0.00173587	0.0145997	1.93065	0.949083	insig
MW0136978	7,3',4',5'-Tetrahydroxyflavone	Flavonoids	Flavones	C15H10O6	2	0.7287	67858-31-5	127266	159051	180037	120606	160506	122263	0.652466	0.357278	0.522125	1.15613	0.209303	insig
MW0014489	4-Hydroxybutyric acid	Organic acids	Organic acids	C4H8O3	2	0.7281	591-81-1	2.34183e+06	2.25423e+06	2.31668e+06	2.55586e+06	2.70346e+06	2.71594e+06	1.34077	0.00898301	0.0414886	0.866774	-0.206272	insig
MW0103525	Deoxyuridine-5'-diphosphate	Nucleotides and derivatives	Nucleotides and derivatives	C9H14N2O11P2	2	0.7267	4208-67-7	683222	719734	694586	185707	290471	249576	1.36674	0.00191451	0.0155945	2.89015	1.53115	up
MW0114558	Glucovanillin	Benzene and substituted derivatives	Benzene and substituted derivatives	C14H18O8	2	0.7238	494-08-6	31546.7	36263.9	33802.7	448.74	1313.67	699.55	1.38837	0.00123006	0.0119222	41.2733	5.36714	up
MW0139715	[(2R,3R,4S,5S,6R)-2-[(1R,2Z,3S,4R,5S)-2-(cyanomethylidene)-3-hydroxy-4,5-dimethoxycyclohexyl]oxy-4,5-dihydroxy-6-(hydroxymethyl)oxan-3-yl] (Z)-3-(4-hydroxy-3-methoxyphenyl)prop-2-enoate	Others	Lactones	C26H33NO12	2	0.7236	67411-22-7	102834	104128	112494	101972	94423.4	96349.5	1.07968	0.0832858	0.193885	1.09124	0.12597	insig
MEDN1324	5-Phenylvaleric acid	Organic acids	Organic acids	C11H14O2	2	0.7232	2270-20-4	3291.59	1185.78	2902.13	1290.96	1300.73	1029.57	0.967424	0.190404	0.34738	2.03783	1.02703	insig
MW0127881	3',4'-Dimethoxy-2'-hydroxychalcone	Others	Ketone compounds	C17H16O4	2	0.7228	82964-34-9 | 7478-65-1	77293.1	75387.7	84331.4	88302	75086.1	86584.5	0.548254	0.440207	0.589086	0.948153	-0.0768079	insig
MW0108066	Lys-Met	Amino acids and derivatives	Amino acids and derivatives	C11H23N3O3S	2	0.7227	97729-52-7	3111.11	5010.83	6583.21	3540.63	4564.1	4664.84	0.300592	0.595429	0.710173	1.15158	0.203612	insig
MW0106813	Gln-Gly	Amino acids and derivatives	Amino acids and derivatives	C7H13N3O4	2	0.7225	2650-65-9	144.64	83.06	576.68	162.02	71.52	986.21	0.120553	0.702438	0.791789	0.659463	-0.600636	insig
MW0114628	Inositol 1,3-bisphosphate	Others	Saccharides	C6H14O12P2	2	0.7209	103597-56-4	94264.5	99333	36144.2	211282	208648	103152	1.02788	0.0923613	0.209921	0.439207	-1.18703	down
MW0105524	Ala-Lys	Amino acids and derivatives	Amino acids and derivatives	C9H19N3O3	2	0.7204	6366-77-4	123810	101304	114256	126703	126283	74574.4	0.227154	0.847252	0.896384	1.03605	0.0510995	insig
MW0012774	1-Eicosanoyl-sn-glycero-3-phosphocholine	Lipids	LPC	C28H58NO7P	2	0.7196	108341-80-6	785.83	1048.54	1735.72	1672.92	2483.53	1322.28	0.849722	0.228929	0.390789	0.651627	-0.617881	insig
MW0003823	m-Aminobenzoic acid	Benzene and substituted derivatives	Benzene and substituted derivatives	C7H7NO2	2	0.7189	99-05-8	184066	183572	216512	7620.49	18711.7	23135.5	1.35922	0.00111672	0.011145	11.8087	3.56178	up
MW0106444	Dihydrofolic acid	Organic acids	Organic acids	C19H21N7O6	2	0.7185	4033-27-6	3532.42	7849.23	10786.7	120450	102069	115820	1.36847	0.000917076	0.00999365	0.065521	-3.9319	down
MW0106770	gamma-Glutamylglutamate	Amino acids and derivatives	Amino acids and derivatives	C10H16N2O7	2	0.7175	1116-22-9	5346.71	14477.4	5494.03	25668.5	10412.2	21636.3	1.00217	0.130468	0.268803	0.438661	-1.18882	down
MW0054002	Hyperforin	Heterocyclic compounds	Heterocyclic compounds	C35H52O4	2	0.717	11079-53-1	35312.2	28232.3	34862.3	79994.5	76316.7	72154.1	1.38344	0.000176151	0.00394577	0.43073	-1.21515	down
MW0129795	11,12-Dimethoxydihydrokawain	Others	Ketone compounds	C16H20O5	2	0.7148	38146-60-0	52376.9	49572.1	55042.8	63931	64370	62328.6	1.33758	0.0108133	0.0470835	0.823543	-0.280083	insig
MW0001218	Propylene glycol dibenzoate	Benzene and substituted derivatives	Benzene and substituted derivatives	C17H16O4	2	0.7142	19224-26-1	801.67	1033.18	1354.24	224.85	626.88	1316.92	0.690136	0.411933	0.569151	1.47054	0.556348	insig
MW0107510	Ile-Ser	Amino acids and derivatives	Amino acids and derivatives	C9H18N2O4	2	0.7139	6403-14-1	138498	65072.8	180372	583882	342496	8972.2	0.018501	0.38539	0.546851	0.41048	-1.28462	insig
MW0133989	Negletein	Others	Ketone compounds	C16H12O5	2	0.7134	29550-13-8	552.4	566.07	23735	214.23	544.73	1855.05	0.547616	0.4386	0.588253	9.5078	3.24911	insig
MW0054899	Methyl linoleate	Lipids	Free fatty acids	C19H34O2	2	0.7124	112-63-0	487606	630400	555550	526569	491529	542095	0.535473	0.463191	0.606951	1.07266	0.101193	insig
MW0124096	Famprofazone	Others	Ketone compounds	C24H31N3O	2	0.7103	22881-35-2	47200	50859.8	46686.6	62491.7	45923.3	57989.5	0.793784	0.279284	0.44756	0.869846	-0.201168	insig
MW0105885	Aspartylalanine	Amino acids and derivatives	Amino acids and derivatives	C7H12N2O5	2	0.7066	13433-02-8	20954.1	20005.8	18036.1	18713	19436.2	20250.9	0.12303	0.85045	0.899296	1.01021	0.0146483	insig
MW0112142	2'-Fucosyl-D-lactose	Others	Saccharides	C18H32O15	2	0.706	41263-94-9	560.85	1183.48	31.69	157.09	5224.89	348.61	0.383871	0.512021	0.648169	0.309919	-1.69004	insig
MW0130875	2-Methoxycinnamaldehyde	Phenolic acids	Phenolic acids	C10H10O2	2	0.7044	1504-74-1	29355.5	29429.3	32747	55498.4	52074.3	53140.1	1.39249	0.000113936	0.00308314	0.569536	-0.812142	insig
MW0112752	Kynuramine	Alcohol and amines	Amines	C9H12N2O	2	0.7041	363-36-0	211488	215769	221686	265381	240005	247828	1.28825	0.0304204	0.0946411	0.861566	-0.214968	insig
MW0127953	4-Hydroxychalcone	Flavonoids	Chalcones	C15H12O2	2	0.7039	20426-12-4 | 38239-55-3	22182.2	18790.7	24155.9	10882	15025	13607.2	1.26926	0.0143283	0.0575414	1.64823	0.720921	insig
MW0012071	11-Aminoundecanoic acid	Benzene and substituted derivatives	Benzene and substituted derivatives	C11H23NO2	2	0.7037	2432-99-7 | 25035-04-5 | 25587-80-8	8726.82	27924.2	24860	47260.7	46089.8	71097.4	1.13433	0.0312801	0.0967189	0.374046	-1.41871	down
MW0168309	12-Oxo-2,3-dinor-10,15-phytodienoic acid	Organic acids	Organic acids	C16H24O3	2	0.7013	197247-23-7	474977	565640	504639	232983	205694	204325	1.39064	0.00392732	0.0244246	2.40319	1.26495	up
MW0001273	1,2,4-Benzenetriol	Phenolic acids	Phenolic acids	C6H6O3	2	0.7001	533-73-3	70265.9	66962.1	69530.8	23715.8	23539.5	12724	1.33793	0.00334285	0.0219517	3.44717	1.78541	up
MEDN0198	Citric acid	Organic acids	Organic acids	C6H8O7	3	0.9998	77-92-9	810657	665217	649615	196108	167636	172970	1.39592	0.00783935	0.0381282	3.9602	1.98557	up
MW0013649	Allyl cyclohexanebutyrate	Organic acids	Organic acids	C13H22O2	3	0.9988	7493-65-4	32442.4	33113.5	31003.2	203910	207095	203208	1.40645	1.01263e-06	0.000373296	0.157208	-2.66926	down
MEDP0167	Guanosine	Nucleotides and derivatives	Nucleotides and derivatives	C10H13N5O5	3	0.998	118-00-3 | 26578-09-6 | 197227-95-5 | 103654-69-9 | 103654-70-2 | 146849-94-7 | 197227-93-3 | 202933-46-8 | 244769-87-7 | 247226-75-1 | 250586-91-5 | 250586-97-1 | 30747-23-0	115754	112360	120637	112403	116854	108171	0.673049	0.338195	0.505038	1.03356	0.0476228	insig
MEDL02174	n-Oleoylethanolamine	Alkaloids	Alkaloids	C20H39NO2	3	0.995	111-58-0	16675.7	27023.3	31030.1	37457.3	36704.3	30174.5	0.943297	0.133041	0.273265	0.716234	-0.481496	insig
MEDP0395	Pipecolic acid	Alkaloids	Alkaloids	C6H11NO2	3	0.9876	535-75-1	41204.1	43630.1	47427.4	26326.5	22922.9	21664	1.37167	0.00115067	0.0113713	1.86511	0.899264	insig
MEDP0022	L-Proline	Amino acids and derivatives	Amino acids and derivatives	C5H9NO2	3	0.987	147-85-3	15144.4	16456.2	27530	85773.9	62327.7	76233.7	1.345	0.00482495	0.0278714	0.263582	-1.92368	down
MEDN1562	Monobutyl phthalate	Others	Lactones	C12H14O4	3	0.9854	131-70-4	1.47732e+06	1.36494e+06	1.40283e+06	1.55163e+06	1.66753e+06	1.67856e+06	1.26822	0.0154172	0.0603518	0.86675	-0.206312	insig
MEDP0251	Trigonelline	Alkaloids	Pyridine alkaloids	C7H7NO2	3	0.984	535-83-1	4853.58	21584.5	13580.5	9337.72	16045.2	1262.59	0.496952	0.52805	0.661437	1.50189	0.586776	insig
MEDL02396	Sucrose	Others	Saccharides	C12H22O11	3	0.9815	57-50-1	3.61097e+07	3.52061e+07	3.86238e+07	1.93101e+07	1.74743e+07	1.58001e+07	1.38583	0.000185959	0.0041197	2.09072	1.064	up
MEDL00575	L-Isoleucine	Amino acids and derivatives	Amino acids and derivatives	C6H13NO2	3	0.981	73-32-5	949352	949127	983345	1.09172e+06	1.09493e+06	1.0401e+06	1.32334	0.00866346	0.0407597	0.893103	-0.163101	insig
MEDL00009	L-Valine	Amino acids and derivatives	Amino acids and derivatives	C5H11NO2	3	0.9793	72-18-4	35555.9	59502.4	53611.2	116686	107775	112500	1.3159	0.00717731	0.0359937	0.441207	-1.18047	down
MW0015654	All-trans-heptaprenyl diphosphate	Organic acids	Organic acids	C35H60O7P2	3	0.9786	76078-18-7	2290.42	191.41	825.66	6637.09	5161.4	3679.47	1.12124	0.0217852	0.0755292	0.21369	-2.22641	down
MEDP0054	Glutamine	Amino acids and derivatives	Amino acids and derivatives	C5H10N2O3	3	0.9782	56-85-9	4926.76	33311	1944.44	52037.7	45572.7	45367.7	1.06483	0.0694129	0.170576	0.281038	-1.83116	down
MEDP0081	Serotonin	Alkaloids	Plumerane	C10H12N2O	3	0.9754	50-67-9	2631.87	11467.6	9119.39	3000.13	4131.55	4105.25	0.724387	0.268567	0.437697	2.0663	1.04705	insig
MEDP1083	Oxypurinol	Heterocyclic compounds	Heterocyclic compounds	C5H4N4O2	3	0.9746	2465-59-0 | 184764-63-4 | 187486-05-1 | 187486-06-2	24.05	857.45	845.53	76.95	718.72	371.33	0.026575	0.608352	0.721081	1.47989	0.565489	insig
MEDN0006	L-Tyrosine	Amino acids and derivatives	Amino acids and derivatives	C9H11NO3	3	0.9736	60-18-4	1.34013e+06	1.45107e+06	1.48791e+06	929406	963088	886739	1.38374	0.00229043	0.0177193	1.53967	0.622626	insig
MEDL01914	2,6-Dihydroxybenzoic acid	Benzene and substituted derivatives	Benzene and substituted derivatives	C7H6O4	3	0.9717	303-07-1	721.37	1268.25	1480.01	2831.32	3190.44	2624.44	1.27137	0.00467522	0.0271621	0.40129	-1.31728	down
MEDP0101	4-Hydroxycinnamic acid	Phenolic acids	Phenolic acids	C9H8O3	3	0.9698	501-98-4	41069.4	40421.3	47484.7	28420.7	44289.5	33262.9	0.849186	0.24116	0.405317	1.21706	0.283398	insig
MEDL00586	Arginine	Amino acids and derivatives	Amino acids and derivatives	C6H14N4O2	3	0.9688	74-79-3	50081.2	47650.9	64499.1	97835.7	56649.8	93087.4	1.0042	0.148185	0.293315	0.655286	-0.609802	insig
MEDN0422	2'-Deoxyadenosine	Nucleotides and derivatives	Nucleotides and derivatives	C10H13N5O3	3	0.9675	958-09-8	7546.28	9706.4	4320.46	9905.37	11028.4	10487.2	0.934652	0.16619	0.317422	0.686585	-0.54249	insig
MEDP0085	Tyramine	Alkaloids	Alkaloids	C8H11NO	3	0.9667	51-67-2	41339.1	39649.8	38749.6	34615.2	30204.8	27296.7	1.23929	0.037372	0.110142	1.29986	0.378353	insig
MEDN0428	Succinyladenosine	Nucleotides and derivatives	Nucleotides and derivatives	C14H17N5O8	3	0.9653	4542-23-8	101310	105908	102170	67196.6	66614.6	68530.8	1.40287	0.000396537	0.00619524	1.52904	0.612625	insig
MEDP0020	Methionine	Amino acids and derivatives	Amino acids and derivatives	C5H11NO2S	3	0.9651	63-68-3	26265	30950.1	25430.7	44314.3	40528.7	41571.1	1.34383	0.00354826	0.022897	0.65377	-0.613144	insig
MEDN0455	Guanine	Nucleotides and derivatives	Nucleotides and derivatives	C5H5N5O	3	0.9633	73-40-5	36458.6	38717.1	37213.1	47594.6	25763.1	39360.8	0.107187	0.987831	0.992014	0.997076	-0.00422528	insig
MEDN0151	Adenine	Nucleotides and derivatives	Nucleotides and derivatives	C5H5N5	3	0.9623	73-24-5	10873.4	4159.86	15366	16436.3	12321.9	1822.91	0.18417	0.991673	0.993892	0.994053	-0.00860553	insig
MEDL01940	Feruloylputrescine	Alkaloids	Phenolamine	C14H20N2O3	3	0.9615	501-13-3 | 91000-11-2	2.95683e+06	3.4177e+06	3.45275e+06	2.94612e+06	3.53453e+06	3.52202e+06	0.146489	0.827923	0.883118	0.982466	-0.0255209	insig
MEDL01799	Isoscutellarein	Flavonoids	Flavones	C15H10O6	3	0.9608	41440-05-5	148.57	35	152.39	20.84	171.65	29.94	0.534998	0.577347	0.69493	1.51041	0.594938	insig
MW0011145	(3b,16a,20R)-3,16,20,22,25-Pentahydroxy-5-cucurbiten-11-one 3-[glucosyl-(1->6)-glucoside]	Others	Ketone compounds	C42H70O16	3	0.96	178062-94-7	510.7	1240.79	760.88	1869.95	3890.25	4821.68	1.23762	0.083212	0.193825	0.237422	-2.07448	down
MEDP1468	Panthenol	Others	Alcohol compounds	C9H19NO4	3	0.9593	81-13-0	467075	470389	488599	785960	764763	763311	1.40344	8.07866e-06	0.00090481	0.616267	-0.698373	insig
MEDN0031	Pyroglutamic acid	Amino acids and derivatives	Amino acids and derivatives	C5H7NO3	3	0.9589	98-79-3	75920.5	75764	78512.8	107046	26103.7	92128.4	0.287028	0.953451	0.972971	1.02183	0.0311607	insig
MW0138003	Diosmin	Flavonoids	Flavones	C28H32O15	3	0.9586	520-27-4	333.8	43.14	26867.6	90.31	292.28	535.98	0.380062	0.427799	0.579404	29.6597	4.89043	insig
MEDL01762	Sakuranetin	Flavonoids	Flavanones	C16H14O5	3	0.9582	2957-21-3	24.26	21.09	21.02	14.92	36.51	14.52	0.232586	0.986455	0.991125	1.00637	0.00915861	insig
MEDL00101	Sphinganine	SL	SPH	C18H39NO2	3	0.9573	764-22-7	243735	238918	235842	474178	734605	439756	1.30652	0.0794476	0.186892	0.435837	-1.19814	down
MEDN1015	Nicotinic acid	Others	Vitamin	C6H5NO2	3	0.9567	59-67-6	120045	130513	136787	176848	173331	160314	1.3276	0.00425394	0.0258701	0.758768	-0.398269	insig
MEDP1647	2-Amino-1-phenylethanol	Alkaloids	Alkaloids	C8H11NO	3	0.9565	7568-93-6	2.35529e+06	2.35658e+06	2.52277e+06	1.35511e+06	1.34358e+06	1.32905e+06	1.40227	0.0023202	0.0177725	1.79621	0.844952	insig
MEDP0646	2,3-Dihydrobenzofuran	Benzene and substituted derivatives	Benzene and substituted derivatives	C8H8O	3	0.9561	496-16-2	133406	128649	136836	154070	138509	142597	1.07592	0.104485	0.230336	0.916622	-0.125602	insig
MEDP1315	Quinoline	Alkaloids	Quinoline alkaloids	C9H7N	3	0.9558	91-22-5	80736.8	81049.3	80694.4	85599.8	83573.7	94718.6	1.03296	0.172617	0.325079	0.918862	-0.12208	insig
MEDL02311	Moschamine	Alkaloids	Plumerane	C20H20N2O4	3	0.9557	68573-23-9	89384.4	87916.1	93698.2	240.13	941.65	760.59	1.38793	0.000313197	0.00553865	139.52	7.12432	up
MEDL01942	Dibutyl phthalate	Phenolic acids	Phenolic acids	C16H22O4	3	0.9551	84-74-2	548076	539199	549449	598536	644078	653854	1.31386	0.0328769	0.10012	0.863038	-0.212504	insig
MEDP0453	Indole	Alkaloids	Plumerane	C8H7N	3	0.9527	120-72-9	166480	176485	166325	223733	191521	206180	1.26074	0.043967	0.122767	0.819538	-0.287117	insig
MEDP0442	Choline Alfoscerate	Lipids	PC	C8H20NO6P	3	0.9525	28319-77-9	85284.4	95674.3	89367.7	50145	40658.9	36626.3	1.36157	0.000970439	0.0103514	2.12137	1.08499	up
MEDN0153	Adenosine monophosphate	Nucleotides and derivatives	Nucleotides and derivatives	C10H14N5O7P	3	0.9522	61-19-8	1.53283e+06	1.56032e+06	1.66624e+06	411561	413431	464975	1.4032	0.000242376	0.00483793	3.68955	1.88344	up
MEDP0125	Choline	Alkaloids	Alkaloids	C5H14NO+	3	0.9519	62-49-7	698104	679331	664071	885313	826812	768659	1.28488	0.0400753	0.115213	0.822928	-0.281163	insig
MEDL01737	5-Aminoimidazole ribonucleotide	Nucleotides and derivatives	Nucleotides and derivatives	C8H14N3O7P	3	0.9498	25635-88-5	7070.99	8115.91	3221.86	12109.2	2172.28	2420.17	0.382461	0.884948	0.923424	1.10221	0.140405	insig
MW0114590	Hexaethylene glycol	Alcohol and amines	Alcohols	C12H26O7	3	0.9494	2615-15-8	53221.2	53214.4	55834.3	59469.6	60212.5	59924.8	1.3387	0.0173454	0.0647562	0.903472	-0.146448	insig
MEDP1051	Sphingosine	Lipids	Sphingolipids	C18H37NO2	3	0.9493	123-78-4	39995.6	46324.5	44703.5	52619.8	58135.6	56951.8	1.29023	0.0087981	0.0410885	0.781265	-0.356117	insig
MEDN0551	3-Indoleacrylic acid	Alkaloids	Plumerane	C11H9NO2	3	0.9482	29953-71-7	8.59923e+06	8.69081e+06	8.54698e+06	1.0682e+07	1.11441e+07	1.07572e+07	1.39652	0.00219364	0.0172619	0.792954	-0.334691	insig
MEDP1162	1-Methylguanine	Nucleotides and derivatives	Nucleotides and derivatives	C6H7N5O	3	0.9482	938-85-2	18357.5	21094.5	21988	11698.1	14422.6	12174.2	1.32602	0.00602434	0.0321462	1.60439	0.682024	insig
MEDP0179	Uridine	Nucleotides and derivatives	Nucleotides and derivatives	C9H12N2O6	3	0.9481	58-96-8	10301.7	11888.1	12307.8	4527.95	8961.05	9357.54	0.971719	0.114895	0.24633	1.50997	0.594518	insig
MEDP1160	LPE(18:1/ 0:0)	Lipids	LPE	C23H46NO7P	3	0.9473	89576-29-4	54291.6	51615.2	61496.1	119571	113801	117902	1.39218	0.00024798	0.00490126	0.476559	-1.06927	down
MW0111937	2,3-Butanediol glucoside	Alcohol and amines	Alcohols	C10H20O7	3	0.9466	146763-54-4	166559	155945	165067	80822.6	81784.9	91730	1.39351	8.73521e-05	0.00260615	1.91703	0.93887	insig
MEDN0682	Octadecanamide	Lipids	Free fatty acids	C18H37NO	3	0.946	124-26-5	18322	15020.5	38186.7	69254.2	60230.4	30549	1.03902	0.112085	0.242319	0.446964	-1.16177	down
MEDL01831	n-cis-Feruloyltyramine	Alkaloids	Phenolamine	C18H19NO4	3	0.9433	80510-09-4	596731	609277	586679	930088	907330	909858	1.40408	5.69001e-06	0.000799735	0.652532	-0.615879	insig
MEDN1545	Guanosine-5'-monophosphate	Nucleotides and derivatives	Nucleotides and derivatives	C10H14N5O8P	3	0.9422	85-32-5 | 128952-18-1 | 29593-02-0	36155.8	35563.2	42523	38088.7	37092.9	30134.7	0.572333	0.425283	0.576831	1.08475	0.117362	insig
MEDL02050	Niacinamide	Others	Vitamin	C6H6N2O	3	0.9409	98-92-0	366497	355751	367758	2.78019e+06	2.72657e+06	2.52537e+06	1.40615	0.00109495	0.0111036	0.135706	-2.88145	down
MEDP0065	N-Acetyl-L-glutamic acid	Amino acids and derivatives	Amino acids and derivatives	C7H11NO5	3	0.9387	1188-37-0	155.05	789.98	244.34	1366.82	1258.16	766.69	1.0876	0.0539226	0.142009	0.350674	-1.5118	down
MEDP1077	2'-O-Methyladenosine	Nucleotides and derivatives	Nucleotides and derivatives	C11H15N5O4	3	0.9381	2140-79-6	46243.3	44358.8	12508.9	53096.2	56178.5	47014.6	0.771041	0.243133	0.407783	0.659745	-0.60002	insig
MW0115033	Nonoxynol-9	Benzene and substituted derivatives	Benzene and substituted derivatives	C33H60O10	3	0.9374	26571-11-9	2073.51	5163.05	4576.15	2733.04	209.48	2117.2	0.815462	0.140753	0.284897	2.33466	1.22321	insig
MEDN0068	S-(5-Adenosy)-L-Homocysteine	Amino acids and derivatives	Amino acids and derivatives	C14H20N6O5S	3	0.9368	979-92-0	38190.6	45894.4	46131.7	66244.6	80019	65943.3	1.32118	0.0127154	0.0523149	0.613631	-0.704557	insig
MW0012956	PC(16:0/20:4(5Z,8Z,11Z,14Z))	GP	PC	C44H80NO8P	3	0.9356	35418-58-7	26827.5	24771.9	19355.7	4054.96	164.77	678.95	1.23415	0.00284468	0.0198785	14.4845	3.85644	up
MEDP1493	N6-Methyladenosine	Nucleotides and derivatives	Nucleotides and derivatives	C11H15N5O4	3	0.9341	1867-73-8	11656.6	11757.6	12206.8	10577.6	10461.4	8699.8	1.14908	0.074742	0.179595	1.19779	0.26038	insig
MEDN1502	2-Phenylbutyric acid	Organic acids	Organic acids	C10H12O2	3	0.9341	90-27-7	419017	253671	256678	570099	511876	561340	1.22536	0.0379949	0.111172	0.565544	-0.82229	insig
MW0014162	3-Methyl-5-pentyl-2-furannonanoic acid	Organic acids	Organic acids	C19H32O3	3	0.9333	57818-39-0	184932	223795	212193	182966	184605	180363	1.02606	0.167668	0.319186	1.1332	0.180403	insig
MEDP0276	Indole-3-carboxaldehyde	Alkaloids	Plumerane	C9H7NO	3	0.9325	487-89-8	1.02998e+06	1.03492e+06	1.05777e+06	1.36295e+06	1.31884e+06	1.303e+06	1.39538	0.000911566	0.00998759	0.783644	-0.35173	insig
MEDL02483	5-Hydroxytryptophol	Alkaloids	Plumerane	C10H11NO2	3	0.9296	154-02-9	101765	106099	105835	60185.3	64471.3	55916.2	1.38994	0.000418268	0.0063881	1.73724	0.796798	insig
MEDL02018	(2E)-Decenoyl-ACP	Amino acids and derivatives	Amino acids and derivatives	C6H11NO2	3	0.9287	52-52-8	16197	3897.07	13012.1	23749.8	17637.9	22114.5	0.937944	0.0927503	0.21045	0.521341	-0.939701	insig
MEDL01887	2-Hydroxybenzaldehyde	Phenolic acids	Phenolic acids	C7H6O2	3	0.9283	90-02-8	161109	175118	177328	142668	121311	145481	1.22316	0.0248664	0.0828606	1.25423	0.326798	insig
MEDP0212	N-Acetylserotonin	Alkaloids	Plumerane	C12H14N2O2	3	0.9275	1210-83-9	2264.91	2699.83	1143.49	407.33	1023.14	2146.08	0.747842	0.288077	0.455858	1.70786	0.772186	insig
MEDN0128	Vanillin	Phenolic acids	Phenolic acids	C8H8O3	3	0.9257	121-33-5	126404	128000	129950	154316	153247	145626	1.36737	0.007498	0.0370036	0.848114	-0.237671	insig
MEDL02347	L-Phenylalanine	Amino acids and derivatives	Amino acids and derivatives	C9H11NO2	3	0.9251	63-91-2	5949.52	3765.87	5222.96	1471.81	277.45	1793.48	1.1421	0.0109406	0.0474837	4.21661	2.07608	up
MW0005118	4-Hydroxyphenylacetaldehyde	Benzene and substituted derivatives	Benzene and substituted derivatives	C8H8O2	3	0.9247	7339-87-9	20442.7	15761.9	18962.5	14059.8	12331.4	2823.75	0.88341	0.117765	0.250169	1.88831	0.917099	insig
MEDL02620	3'-Methoxydaidzein	Flavonoids	Isoflavones	C16H12O5	3	0.921	21913-98-4	1294.16	1916.19	156.8	491.56	1403.65	226.93	0.223944	0.548062	0.673509	1.58668	0.666008	insig
MEDL02710	Indole-3-acetamide	Alkaloids	Plumerane	C10H10N2O	3	0.9194	879-37-8	23759.6	25182.1	22206.1	26438	19206.5	16840.9	0.656357	0.425609	0.576831	1.13863	0.187302	insig
MEDL00873	Hydroxyurea	Alcohol and amines	Amines	CH4N2O2	3	0.918	127-07-1	1573.65	18537.3	44651.6	105226	96708.5	95647.2	1.04083	0.0202513	0.0716258	0.217629	-2.20006	down
MEDP1667	Phe-Glu	Amino acids and derivatives	Amino acids and derivatives	C14H18N2O5	3	0.9179	3617-45-6	144701	149333	146235	85864.6	83797.2	87764.9	1.40423	5.75206e-06	0.000799735	1.71027	0.774221	insig
MW0106447	Diisodityrosine	Amino acids and derivatives	Amino acids and derivatives	C36H38N4O12	3	0.9166	175889-19-7	161234	142849	140484	188695	192293	189889	1.32907	0.0211469	0.0738859	0.778741	-0.360784	insig
MEDP0513	Palmitic amide	Others	Others	C16H33NO	3	0.9162	629-54-9	950.25	2981.66	2746.86	2832.86	7021.13	10512.1	1.0059	0.168572	0.31975	0.327935	-1.60852	down
MEDL02754	2,6-Dimethoxy-1,4-benzoquinone	Quinones	Quinones	C8H8O4	3	0.9159	530-55-2	228916	219509	231478	231842	231525	243607	0.903498	0.16995	0.321256	0.96171	-0.0563258	insig
MEDP1026	2,4-Dihydroxybenzoic acid	Phenolic acids	Phenolic acids	C7H6O4	3	0.913	89-86-1	7348.71	10841.5	7844.41	13202	13445.9	12298.9	1.2108	0.0477807	0.129545	0.668465	-0.581077	insig
MEDN1476	Allantoic acid	Organic acids	Organic acids	C4H8N4O4	3	0.9123	99-16-1	364204	350794	362395	512939	491289	440169	1.33917	0.0261004	0.0856135	0.745911	-0.422924	insig
MEDL00388	Cathinone	Alkaloids	Alkaloids	C9H11NO	3	0.9106	71031-15-7	83173.4	88170	84171.9	111543	103614	93036.3	1.2065	0.0722552	0.174765	0.829077	-0.270423	insig
MEDN1013	2'-Deoxyadenosine-5'-monophosphate	Nucleotides and derivatives	Nucleotides and derivatives	C10H14N5O6P	3	0.9096	653-63-4	4136.19	4010.53	5166.6	34.06	164.64	385.72	1.30446	0.00463306	0.0269949	22.7804	4.50972	up
MEDL02227	Phenyl salicylate	Phenolic acids	Phenolic acids	C13H10O3	3	0.9091	118-55-8	133954	126200	137608	137242	135073	133751	0.521788	0.502176	0.640185	0.979551	-0.0298076	insig
MW0012928	PC(O-16:0/20:5(5Z,8Z,11Z,14Z,17Z))	GP	PC	C44H80NO7P	3	0.9046	132196-28-2	390440	526823	322073	567817	788616	392874	0.774169	0.279503	0.44756	0.708473	-0.497216	insig
MW0106116	Hydrogen carbonate	Organic acids	Organic acids	CH2O3	3	0.9046	71-52-3	182221	202572	73741.1	82447.8	118482	114062	0.563707	0.354437	0.519291	1.4557	0.541712	insig
MW0115115	Phenethyl rutinoside	Benzene and substituted derivatives	Benzene and substituted derivatives	C20H30O10	3	0.901	88510-08-1	25582.1	27911.6	10867.7	50251.1	54436.7	57311.7	1.20337	0.0160063	0.0617233	0.397294	-1.33172	down
MEDN0400	gamma-Linolenic Acid	Lipids	Free fatty acids	C18H30O2	3	0.8999	506-26-3	95195.9	72010.4	96044	258349	247322	307783	1.37824	0.00426457	0.0258957	0.32362	-1.62763	down
MEDP1800	Sanguinarine	Alkaloids	Isoquinoline alkaloids	C20H14NO4+	3	0.897	2447-54-3	1745.26	1337.32	2538.75	2279.25	2940.01	15721.8	0.848073	0.363363	0.527766	0.268436	-1.89735	insig
MEDL01846	Dihydroferulic acid	Organic acids	Organic acids	C10H12O4	3	0.8963	1135-23-5	1389.58	953.93	4814.92	640.02	956.85	1136.01	0.817633	0.350172	0.514989	2.61937	1.38922	insig
MW0132702	3,5,7-Trihydroxy-6,8-dimethoxyflavone	Others	Ketone compounds	C17H14O7	3	0.8953	33183-51-6	4124.98	20327.3	1100.05	17950.2	15508.8	12963.3	0.822322	0.364211	0.528263	0.550431	-0.861365	insig
MEDP0151	Isoguanine	Nucleotides and derivatives	Nucleotides and derivatives	C5H5N5O	3	0.8923	3373-53-3	52710.3	45477.9	51577.3	77319.7	45600	66461.2	0.7691	0.289744	0.457778	0.790817	-0.338585	insig
MEDP1685	Phytosphingosine	Lipids	Sphingolipids	C18H39NO3	3	0.8921	554-62-1	1.00685e+07	9.96339e+06	1.11321e+07	1.35739e+07	1.32024e+07	1.28464e+07	1.33942	0.006118	0.03233	0.786519	-0.346446	insig
MEDP1087	MG(18:2/0:0/0:0)	GL	MG	C21H38O4	3	0.8906	26545-74-4	29896.3	47345.7	43188.1	56621.2	56412.5	56079.3	1.10664	0.0908936	0.207639	0.712129	-0.48979	insig
MEDP0461	2-Methylguanosine	Nucleotides and derivatives	Nucleotides and derivatives	C11H15N5O5	3	0.8892	2140-77-4	13675.9	4637.62	11187.4	19127.1	23207.9	23520.7	1.12229	0.0279406	0.0899811	0.447964	-1.15855	down
MEDP0574	Oleamide	Lipids	Free fatty acids	C18H35NO	3	0.8868	301-02-0	502740	527392	559982	786437	856659	1.01215e+06	1.34074	0.0276494	0.0893288	0.598858	-0.739713	insig
MEDL01843	Matairesinol	Lignans and Coumarins	Lignans	C20H22O6	3	0.8851	580-72-3	3682.39	5632.44	3289.74	2472.12	2674.85	564.29	0.946526	0.0810553	0.189678	2.20697	1.14207	insig
MW0015418	9,12,15-Octadecatrienoic acid 1-[(phosphonoxy)methyl]-1,2-ethanediyl ester	GP	PA	C39H65O8P	3	0.8826	94086-57-4	91534.6	73979.7	41949.1	107703	111235	107071	1.03151	0.111467	0.242021	0.636373	-0.652056	insig
MEDL00352	Glu-Val	Amino acids and derivatives	Amino acids and derivatives	C10H18N2O5	3	0.88	5879-06-1	80711.7	80888.1	93525.8	25735.6	9229.15	24055.4	1.29201	0.000780549	0.00941463	4.32269	2.11193	up
MEDP0594	Dihydroactinidiolide	Others	Lactones	C11H16O2	3	0.8799	15356-74-8	139129	133770	135371	302013	310436	305101	1.40592	3.06141e-06	0.000649663	0.444956	-1.16827	down
MEDP0180	Nicotinamide mononucleotide	Nucleotides and derivatives	Nucleotides and derivatives	C11H15N2O8P	3	0.8789	1094-61-7	22583.9	18342.4	15806.2	2148.06	614.12	3209.97	1.29882	0.00700281	0.0353383	9.4995	3.24785	up
MW0110047	Tropate	Organic acids	Organic acids	C9H10O3	3	0.8751	552-63-6	36693	37431	39366.8	22112	18022.4	21823.1	1.37151	0.000999193	0.0105124	1.83175	0.873225	insig
MW0015435	Neoxanthin	Others	Others	C40H56O4	3	0.8731	14660-91-4	291.55	2957.06	762.71	5958.03	4973.07	3232.09	1.0779	0.0417275	0.118483	0.283222	-1.82	down
MEDN0563	2-Benzylsuccinic acid	Organic acids	Organic acids	C11H12O4	3	0.8726	884-33-3	500.24	1294.12	130.71	1213.15	1134.76	643.74	0.690938	0.425602	0.576831	0.643481	-0.63603	insig
MEDN1575	Rhapontigenin	Others	Stilbene	C15H14O4	3	0.8706	500-65-2	3492.78	837.17	1553.34	1140.13	1017.25	2909.89	0.130634	0.800206	0.861761	1.16104	0.215414	insig
MW0009385	Phenindione	Benzene and substituted derivatives	Benzene and substituted derivatives	C15H10O2	3	0.8665	83-12-5	372618	365857	359723	667670	664666	670485	1.40595	1.15532e-05	0.000991118	0.548326	-0.866894	insig
MEDL02639	Axillarin	Flavonoids	Flavonols	C17H14O8	3	0.8663	5188-73-8	29715.8	30663.7	37181.4	25459.8	29604.5	63.27	0.66765	0.262205	0.429935	1.76973	0.823531	insig
MEDN0234	Globotriose	Others	Saccharides	C18H32O16	3	0.8654	1109-28-0 | 33404-34-1 | 66580-68-5	22388.1	22913.4	60873	4491.62	5660.59	1467.05	1.27112	0.130539	0.268813	9.1378	3.19185	up
MEDP0316	Homovanillic acid	Phenolic acids	Phenolic acids	C9H10O4	3	0.8648	306-08-1	6830.53	17732	1090.55	89249.5	98231.8	94085.8	1.22634	0.000541738	0.00763737	0.0911082	-3.45627	down
MEDL02331	3,4-Dimethoxycinnamic acid	Phenolic acids	Phenolic acids	C11H12O4	3	0.8645	14737-89-4	28263	42004.8	42371.6	56636.9	50612.9	38960.2	0.855795	0.184152	0.340288	0.770395	-0.376329	insig
MEDL02193	Methyl 4-hydroxycinnamate	Others	Lactones	C10H10O3	3	0.8599	19367-38-5 | 3943-97-3	239778	223355	234314	597882	613183	613669	1.40523	8.01001e-07	0.000373296	0.382218	-1.38753	down
MEDN0017	D-Pyroglutamic acid	Amino acids and derivatives	Amino acids and derivatives	C5H7NO3	3	0.8594	4042-36-8	125570	115419	108928	293168	441283	292941	1.35826	0.043506	0.121648	0.340588	-1.5539	down
MEDL00971	L-Aspartic acid	Amino acids and derivatives	Amino acids and derivatives	C4H7NO4	3	0.8552	56-84-8	40190.6	56903.5	103014	93030.6	132821	68926.4	0.759259	0.298882	0.466689	0.678844	-0.558848	insig
MEDL02189	Gramine	Alkaloids	Plumerane	C11H14N2	3	0.8536	87-52-5	26156.3	25079.9	25365.2	24899.6	29299.2	21149.7	0.1847	0.87619	0.916419	1.01663	0.0237918	insig
mws0059	Rutin	Flavonoids	Flavonols	C27H30O16	3	0.8458	153-18-4	16153.9	18135.5	18360.2	12675	11063.5	11179.3	1.35052	0.00330814	0.0219035	1.50782	0.592462	insig
MW0114156	D-(-)-Fructose	Others	Saccharides	C6H12O6	3	0.8419	57-48-7 | 30237-26-4 | 25702-76-5 | 139686-85-4	370892	334190	361619	331607	293182	339918	0.949442	0.138837	0.282153	1.10573	0.144994	insig
MEDP1448	1-Stearoyl-sn-glycerol	GL	MG	C21H42O4	3	0.8414	22610-61-3	314668	216524	249398	310186	331002	65151.7	0.386314	0.805025	0.864641	1.10512	0.144203	insig
MEDN1539	Genipin	Terpenoids	Monoterpenoids	C11H14O5	3	0.8302	6902-77-8	651426	651123	689202	760360	719655	782006	1.26543	0.019473	0.0703539	0.880519	-0.183574	insig
MW0152757	Lophenol	Alcohol and amines	Alcohols	C28H48O	3	0.8271	481-25-4	1842.17	156992	188453	1715.67	175663	435.56	0.551311	0.528462	0.661437	1.95309	0.965759	insig
MEDP1153	20-Hydroxyeicosatetraenoic acid	Lipids	Free fatty acids	C20H32O3	3	0.8266	79551-86-3	72.5	169.53	260.83	852.86	550	754.37	1.25422	0.0103262	0.0454036	0.233104	-2.10095	down
MW0168818	Oxybenzone	Benzene and substituted derivatives	Benzene and substituted derivatives	C14H12O3	3	0.8199	131-57-7	15049.5	14864.3	14983.9	16965.2	17560.6	16305.3	1.32729	0.029689	0.0934312	0.883272	-0.17907	insig
MEDL02383	Ethyl gallate	Phenolic acids	Phenolic acids	C9H10O5	3	0.8191	831-61-8	60532.1	62437.7	54210.7	77739.2	70930.4	73310.4	1.28506	0.0105144	0.0460805	0.798182	-0.32521	insig
MEDL00375	Oglufanide	Amino acids and derivatives	Amino acids and derivatives	C16H19N3O5	3	0.8178	38101-59-6	46985.5	42049	39998.7	33410.2	32120.9	31464.2	1.32405	0.0285274	0.091411	1.3303	0.411756	insig
MW0111330	Tridihexethyl	Benzene and substituted derivatives	Benzene and substituted derivatives	C21H36NO+	3	0.8153	60-49-1	199829	228192	220410	325455	346235	366732	1.3726	0.00139813	0.0127829	0.62444	-0.679366	insig
MEDL00422	PC(18:3/18:3)	GP	PC	C44H76NO8P	3	0.8136	324054-21-9	473285	654928	434153	169364	463911	56090.4	0.94956	0.123781	0.258699	2.26638	1.18039	insig
MEDP0792	Pyrrolidine	Alkaloids	Pyrrole alkaloids	C4H9N	3	0.8098	123-75-1	40178.5	54523.3	52139.7	62355.2	65780	55132.4	1.01759	0.0966993	0.216248	0.80124	-0.319693	insig
MW0016109	beta-Cryptoxanthin	Alcohol and amines	Alcohols	C40H56O	3	0.808	472-70-8	5553.23	2661.4	5815.99	36654.8	48742.9	49620.3	1.36944	0.00777481	0.0379057	0.103917	-3.2665	down
MEDN1399	Benzenebutanoic acid	Organic acids	Organic acids	C10H12O2	3	0.8042	1821-12-1	125771	140017	135352	163134	153134	140075	1.07267	0.0922652	0.209821	0.879032	-0.186013	insig
MEDL02259	Caffeine	Alkaloids	Alkaloids	C8H10N4O2	3	0.8009	58-08-2	1333.81	1557.71	1723.24	105764	105001	106609	1.40589	6.96118e-06	0.000825688	0.0145404	-6.10379	down
MW0015645	all-trans-18-Hydroxyretinoic acid	Organic acids	Organic acids	C20H28O3	3	0.7998	63531-93-1	13749.5	9103.52	12509.2	507.65	957.99	587.22	1.38934	0.0145764	0.0579034	17.2258	4.1065	up
MEDP1617	L-Gulose	Others	Saccharides	C6H12O6	3	0.7982	6027-89-0	890347	899592	892335	2.7485e+06	2.5159e+06	2.39773e+06	1.40283	0.00380948	0.0239623	0.350069	-1.51429	down
MEDP1168	1-Aminocyclopropanecarboxylic acid	Organic acids	Organic acids	C4H7NO2	3	0.7976	22059-21-8	131257	178572	146698	88361.2	92624.6	123511	1.16596	0.0492928	0.132323	1.49928	0.584273	insig
MEDP1027	Maltol	Heterocyclic compounds	Heterocyclic compounds	C6H6O3	3	0.7956	118-71-8	16665	17677.1	21412.4	32015.2	35957	31925.9	1.35085	0.00173806	0.0145997	0.558114	-0.841368	insig
MEDP1295	Cytarabine	Nucleotides and derivatives	Nucleotides and derivatives	C9H13N3O5	3	0.7953	147-94-4	93150.6	62027.4	100696	146741	191742	147653	1.24205	0.0171619	0.0643015	0.526342	-0.925927	insig
MEDN0442	Pantetheine	Alkaloids	Alkaloids	C11H22N2O4S	3	0.7948	496-65-1	2664.7	4666.1	4428.09	9898.71	8343.78	11338.4	1.29569	0.00667503	0.0343726	0.397517	-1.33091	down
MEDL02197	7-O-Methylluteolin	Flavonoids	Flavones	C16H12O6	3	0.7947	20243-59-8	995.46	23355	27656.7	29386.1	545.51	1038.47	0.488254	0.608508	0.721081	1.67927	0.747835	insig
MW0106553	Pantethine	Alcohol and amines	Polyamines	C22H42N4O8S2	3	0.7944	16816-67-4	113940	99666.7	108942	88319.7	87012.6	86090.4	1.3131	0.0369295	0.109226	1.23382	0.303135	insig
MEDP0137	3,4-Dihydroxybenzaldehyde	Phenolic acids	Phenolic acids	C7H6O3	3	0.7932	139-85-5	22697	22110.5	26673.6	3531.82	4696.68	26805	0.937435	0.247387	0.41337	2.04036	1.02883	insig
MEDP0290	Sinapic acid	Phenolic acids	Phenolic acids	C11H12O5	3	0.7925	7362-37-0	504130	492270	497650	1.26237e+06	1.22636e+06	1.24387e+06	1.40644	4.77223e-05	0.00196343	0.400271	-1.32095	down
MW0124205	Gambogic acid	Organic acids	Organic acids	C38H44O8	3	0.7918	2752-65-0	5193.91	862.38	4646.26	12062.5	10199	9323.79	1.05838	0.0184098	0.0674801	0.338846	-1.5613	down
MEDL02163	15(S)-HPETE	Lipids	Free fatty acids	C20H32O4	3	0.7904	70981-96-3	598.53	861.41	3993.79	566.22	1520.3	11617.5	0.336896	0.523837	0.657773	0.397967	-1.32928	insig
MEDN0101	Theobromine	Alkaloids	Alkaloids	C7H8N4O2	3	0.7901	83-67-0	5890.06	7849.3	7800.14	8515.67	7368.03	7149.9	0.44587	0.559019	0.681669	0.935134	-0.0967552	insig
MW0009918	Thonzylamine	Phenolic acids	Phenolic acids	C16H22N4O	3	0.7885	91-85-0	146015	134482	142952	145519	131285	126893	0.636536	0.385234	0.546851	1.04893	0.0689169	insig
MEDP0426	Xanthurenic acid	Organic acids	Organic acids	C10H7NO4	3	0.7884	59-00-7	1023.74	2242.06	1635.46	1826.92	884.38	3130.88	0.160824	0.699664	0.789853	0.838944	-0.253354	insig
MEDP1314	Monoisobutyl phthalate	Others	Lactones	C12H14O4	3	0.7869	30833-53-5	133.91	2673.36	1525.31	492.82	1412.89	1770.41	0.187749	0.808437	0.86704	1.17857	0.237043	insig
MEDL02721	Glabrene	Flavonoids	Other Flavonoids	C20H18O4	3	0.7852	60008-03-9	2.39933e+06	2.3329e+06	2.31254e+06	2.16286e+06	2.06451e+06	2.18963e+06	1.28212	0.0138965	0.0559749	1.09783	0.134655	insig
MEDN0163	Hypoxanthine	Nucleotides and derivatives	Nucleotides and derivatives	C5H4N4O	3	0.7848	68-94-0	2858.38	5203.95	11099.9	199908	315677	314588	1.37484	0.0192526	0.0697453	0.0230822	-5.43708	down
MEDL01753	4-Methylesculetin	Lignans and Coumarins	Coumarins	C10H8O4	3	0.7827	529-84-0	103920	109600	118654	104858	101404	107291	0.786969	0.283509	0.451642	1.05939	0.0832298	insig
MEDP0289	3,4,5-Trimethoxycinnamic acid	Phenolic acids	Phenolic acids	C12H14O5	3	0.7826	90-50-6	20488.3	21589.6	19804.6	30361.6	28498.8	29556.7	1.38609	0.000296874	0.00541628	0.699893	-0.514794	insig
MEDN1397	Succinylacetone	Organic acids	Organic acids	C7H10O4	3	0.782	51568-18-4	1259.22	217.23	165.67	60.02	1058.03	321.35	0.17822	0.891679	0.928285	1.14084	0.190092	insig
MEDL02026	4-Hydroxy-3-methoxycinnamaldehyde	Phenolic acids	Phenolic acids	C10H10O3	3	0.7818	20649-42-7	177418	112002	155857	333470	315342	322366	1.3298	0.00812704	0.0391964	0.458491	-1.12503	down
MEDP0525	N-Acetyl-L-alanine	Amino acids and derivatives	Amino acids and derivatives	C5H9NO3	3	0.7807	97-69-8	2.01582e+06	2.06716e+06	2.13324e+06	2.0735e+06	2.13295e+06	2.04638e+06	0.203341	0.789432	0.854494	0.994145	-0.00847176	insig
MEDN0721	Metronidazole	Heterocyclic compounds	Heterocyclic compounds	C6H9N3O3	3	0.7798	443-48-1	624.98	59.51	435.27	1150.86	844.01	45.75	0.187423	0.467234	0.610463	0.548735	-0.865818	insig
MEDP1072	N7-Methylguanosine	Nucleotides and derivatives	Nucleotides and derivatives	C11H15N5O5	3	0.7788	20244-86-4	4464.01	4707.45	2813.7	11661.9	11663.6	6534.01	1.22788	0.0604988	0.154094	0.401386	-1.31694	down
MEDP0603	4-Isopropylbenzaldehyde	Others	Aldehyde compounds	C10H12O	3	0.7786	122-03-2	354.36	4054.88	2031.75	4402.95	519.04	5896.84	0.330513	0.496797	0.636507	0.59535	-0.74819	insig
MEDP1604	3-Indoleacetonitrile	Alkaloids	Plumerane	C10H8N2	3	0.7782	771-51-7	39802.2	38856.2	44075.5	9967.34	21880.2	2388.52	1.09856	0.0276397	0.0893288	3.58493	1.84194	up
MEDN0056	N-Acetylleucine	Amino acids and derivatives	Amino acids and derivatives	C8H15NO3	3	0.7768	1188-21-2	277716	263998	281655	302481	307556	304418	1.31298	0.0231137	0.0783806	0.900393	-0.151374	insig
MEDN0555	Hydroxyphenyllactic acid	Benzene and substituted derivatives	Phenolic acids	C9H10O4	3	0.7757	306-23-0	157427	156531	149062	352491	348749	331542	1.404	0.000250468	0.00490236	0.448323	-1.15739	down
MEDP0545	2-Pyrrolidinone	Heterocyclic compounds	Heterocyclic compounds	C4H7NO	3	0.7754	616-45-5	2961.83	1899.85	1104.68	2677.45	2093.71	2327.71	0.546223	0.562119	0.683493	0.840466	-0.250738	insig
MEDL00019	Theophylline	Alkaloids	Alkaloids	C7H8N4O2	3	0.7744	58-55-9	720694	681304	747454	932141	998955	993010	1.37176	0.000891244	0.00983966	0.73508	-0.444027	insig
MEDL02742	Delphinidin 3-sambubioside	Flavonoids	Anthocyanidins	C26H29O16+	3	0.7741	53158-73-9	159.97	572.69	58.87	681.27	137.28	810.72	0.63728	0.346169	0.512768	0.485819	-1.04151	insig
MEDN1325	trans-2-Octenoic acid	Organic acids	Organic acids	C8H14O2	3	0.7738	1871-67-6	211029	204148	200945	237562	246225	243278	1.37508	0.000784005	0.00941463	0.847409	-0.23887	insig
MEDP1839	3,4-Dimethoxybenzaldehyde	Phenolic acids	Phenolic acids	C9H10O3	3	0.7737	120-14-9	9929.35	3706.5	23607.8	11741	11292.3	12403.8	0.274052	0.927811	0.954563	1.05097	0.0717283	insig
MEDP0664	Tyrosine methylester	Amino acids and derivatives	Amino acids and derivatives	C10H13NO3	3	0.7724	1080-06-4	2137.26	14716.6	14265.3	9645.41	8689.81	14932.6	0.352295	0.885534	0.923796	0.935416	-0.0963201	insig
MEDP1757	Ethyl vanillin	Benzene and substituted derivatives	Benzene and substituted derivatives	C9H10O3	3	0.7716	121-32-4	11684.7	10986.2	8177.38	11307.7	13858.1	10688.8	0.701121	0.313192	0.480439	0.860375	-0.216963	insig
MW0003649	3,4-Dimethylbenzoic acid	Phenolic acids	Phenolic acids	C9H10O2	3	0.7714	619-04-5	148198	134259	140954	84582.1	101828	114204	1.24537	0.025642	0.0845367	1.40849	0.49415	insig
MEDP1606	2'-Deoxyguanosine	Nucleotides and derivatives	Nucleotides and derivatives	C10H13N5O4	3	0.7702	961-07-9	5324.14	1596.17	1871.58	43548.9	43354.8	25589.4	1.34327	0.0246559	0.0822951	0.0781549	-3.67752	down
MEDN1410	N-Palmitoylglycine	Amino acids and derivatives	Amino acids and derivatives	C18H35NO3	3	0.7693	158305-64-7	69398.8	69671.1	66326.3	271312	267476	262233	1.40629	2.12992e-05	0.00138513	0.256418	-1.96343	down
MEDL02381	4-Ethylbenzoic acid	Phenolic acids	Phenolic acids	C9H10O2	3	0.7673	619-64-7	400799	407483	425429	382930	356281	402642	0.987885	0.136453	0.278008	1.08045	0.111627	insig
MEDP0012	Ornithine	Amino acids and derivatives	Amino acids and derivatives	C5H12N2O2	3	0.767	3184-13-2	796.1	521.21	649.85	590.88	156.33	484.84	0.800011	0.199426	0.357728	1.59666	0.675053	insig
MEDL00369	Glutamyl-phenylalanine	Amino acids and derivatives	Amino acids and derivatives	C14H18N2O5	3	0.7656	20556-22-3	281.54	554.88	197.6	965.08	3574.53	1208.23	1.19619	0.19791	0.35592	0.179897	-2.47476	down
MEDL02156	Isoeugenol	Phenolic acids	Phenolic acids	C10H12O2	3	0.7653	5932-68-3	197698	195753	204318	222910	232516	192289	0.770118	0.302077	0.469897	0.92289	-0.11577	insig
MEDN1317	3,3-Dimethylglutaric acid	Organic acids	Organic acids	C7H12O4	3	0.7648	4839-46-7	528.93	671.46	702.31	59.29	1057.87	846.93	0.377864	0.952838	0.972632	0.968744	-0.0458129	insig
MEDN0261	Indole-3-propionic acid	Alkaloids	Plumerane	C11H11NO2	3	0.7646	830-96-6	3276.27	3045.44	5982.66	3138.52	6431.63	6983.36	0.555475	0.408696	0.567023	0.743309	-0.427966	insig
MEDL02666	Icaritin	Flavonoids	Flavonols	C21H20O6	3	0.7641	118525-40-9	28026.6	26631.2	26587.8	35960.3	34783.5	37996.5	1.37589	0.00337252	0.0220389	0.747153	-0.420524	insig
MW0123891	Ethionamide	Heterocyclic compounds	Heterocyclic compounds	C8H10N2S	3	0.7627	536-33-4	19.97	799	581.29	12.43	178.96	336.46	0.368499	0.339583	0.506624	2.65276	1.40749	insig
MW0124447	Isatin	Alkaloids	Plumerane	C8H5NO2	3	0.7626	91-56-5	126248	113310	116212	75405	77019	80971.9	1.38342	0.00372606	0.0236218	1.52432	0.608165	insig
MEDN1008	FFA(11:1)	Lipids	Free fatty acids	C11H20O2	3	0.7619	112-38-9	308037	316829	335584	2.24843e+06	2.18481e+06	2.14118e+06	1.40617	0.000118628	0.00316422	0.146089	-2.77508	down
MEDL02179	Coumarin	Lignans and Coumarins	Coumarins	C9H6O2	3	0.7618	91-64-5	166689	155648	164921	230427	253147	253112	1.38343	0.00288917	0.0200501	0.661419	-0.596363	insig
MEDL02733	Tilarginine	Amino acids and derivatives	Amino acids and derivatives	C7H16N4O2	3	0.7614	17035-90-4	36074.9	25028.7	49076.6	70495.9	57523.9	54059.4	1.10446	0.0545188	0.143019	0.605122	-0.724701	insig
MW0131207	3,5-Dimethoxycinnamic acid	Organic acids	Organic acids	C11H12O4	3	0.7604	16909-11-8 | 20767-04-8	1.11312e+06	1.33613e+06	1.0939e+06	958905	1.38607e+06	1.40192e+06	0.221994	0.707117	0.794987	0.945622	-0.080665	insig
MW0137959	Dihydrodaidzein	Flavonoids	Isoflavones	C15H12O4	3	0.7604	17238-05-0	114429	121017	118076	18785.3	19309.3	17474.6	1.40584	0.000139761	0.00354791	6.36183	2.66944	up
MEDP0618	Carnitine-2-methyl-C4	FA	CAR	C12H23NO4	3	0.76	31023-25-3	287.17	34.77	167.87	274.86	111.01	220.66	0.448964	0.682516	0.776716	0.807561	-0.308357	insig
MEDN1584	Tetrahydrocurcumin	Phenolic acids	Phenolic acids	C21H24O6	3	0.7589	36062-04-1	236.15	101.37	66.24	262.03	1032.89	262.96	1.02964	0.270747	0.439856	0.259173	-1.94801	down
MW0139977	Yangonin	Others	Stilbene	C15H14O4	3	0.7567	500-62-9	63342.4	38089	40689.4	83811.6	75846.6	84702.1	1.21926	0.0392047	0.113711	0.581604	-0.781891	insig
MW0127087	Trimethylsilyl heptadecanoate	Organic acids	Organic acids	C20H42O2Si	3	0.7562	55517-58-3	275977	383278	478426	531899	508315	489511	0.990212	0.149912	0.296007	0.743716	-0.427177	insig
MEDP0510	Carnitine C2:0	FA	CAR	C9H17NO4	3	0.7556	4398-79-2	1610.08	56.77	74.19	3883.57	4866.81	9090.65	1.17831	0.0666839	0.166222	0.0975863	-3.35718	down
MW0122229	6-methoxy-3-(1,3-thiazol-2-yl)-1H-indole	Alkaloids	Plumerane	C12H10N2OS	3	0.7551	135531-87-2	216531	221605	231652	172272	216785	228683	0.623811	0.420503	0.574681	1.08425	0.116702	insig
MEDP1899	Benzoylecgonine	Benzene and substituted derivatives	Benzene and substituted derivatives	C16H19NO4	3	0.755	519-09-5	867740	905776	913344	880037	863775	847635	0.961844	0.144235	0.287899	1.03682	0.0521631	insig
MW0114002	Biflorin	Heterocyclic compounds	Heterocyclic compounds	C16H18O9	3	0.7545	89701-85-9	400814	358183	370360	144274	201880	387157	0.934164	0.210683	0.370787	1.54008	0.623005	insig
MW0136677	Fraxinol	Lignans and Coumarins	Coumarins	C11H10O5	3	0.7535	486-28-2	904.82	4724.77	4507.68	4705.64	2915.46	4061.76	0.422606	0.72986	0.811806	0.867704	-0.204724	insig
MEDP1196	Biotin amide	Alcohol and amines	Amines	C10H17N3O2S	3	0.7523	6929-42-6	6830.38	9430.54	8104.05	6220.12	10356.7	7041.71	0.183326	0.875616	0.916057	1.0316	0.0448868	insig
MW0108268	Methylacetoacetic acid	Others	Lactones	C5H8O3	3	0.7513	105-45-3	145139	135312	156106	37462	15512.5	79005.9	1.16628	0.02335	0.0789767	3.30774	1.72585	up
MEDP1904	1-(9Z,12Z-octadecadienoyl)-glycero-3-phosphoethanolamine	GP	LPE	C23H44NO7P	3	0.7502	85046-18-0	9.82673e+06	9.23931e+06	9.21615e+06	1.62568e+07	1.58901e+07	1.59618e+07	1.40206	6.38587e-05	0.00229891	0.587881	-0.766403	insig
MEDP1170	9-Octadecenal	Others	Aldehyde compounds	C18H34O	3	0.7501	5090-41-5	159652	223622	143817	166371	212194	246473	0.628313	0.387211	0.548379	0.843294	-0.245893	insig
MW0118514	2-Ethyl-4-hydroxy-5-methyl-3(2H)-furanone	Others	Ketone compounds	C7H10O3	3	0.7496	27538-10-9	1226.76	1328.02	1844.24	12976.2	8411.61	10854.4	1.3852	0.0179171	0.0661554	0.136437	-2.87369	down
MEDP0322	L-Homoserine	Amino acids and derivatives	Amino acids and derivatives	C4H9NO3	3	0.7467	672-15-1	53208.5	62604.1	58480.7	41260.8	45158.8	33077.8	1.23713	0.0173077	0.0646754	1.45855	0.544537	insig
MEDP1152	2-Methoxy-4-vinylphenol	Phenolic acids	Phenolic acids	C9H10O2	3	0.7467	7786-61-0	640.25	5131.99	2041.59	333.03	4384.09	3411.03	0.0706048	0.956469	0.974597	0.961329	-0.0568972	insig
MW0129932	1-O-Cinnamoyl-beta-D-gentiobiose	Benzene and substituted derivatives	Benzene and substituted derivatives	C21H28O12	3	0.746	181373-65-9	319.68	112.45	91.44	160.49	211.07	48.6	0.266722	0.71583	0.800839	1.24612	0.317444	insig
MEDP1614	Isopentenyl pyrophosphate	Organic acids	Organic acids	C5H12O7P2	3	0.7453	358-71-4	2.25858e+06	2.12377e+06	2.13586e+06	117611	152343	68801.5	1.38986	1.98845e-05	0.00134075	19.2417	4.26616	up
MW0127213	Isopropyl methyl sulfide	Alcohol and amines	Alcohols	C4H10S	3	0.7451	1551-21-9	66249.4	67892.5	62402.2	50913.3	49913.9	53912.9	1.35297	0.00313731	0.0210827	1.27016	0.345005	insig
MW0063534	(4,4a-dimethyl-7-oxo-6-propan-2-ylidene-2,3,4,5,8,8a-hexahydro-1H-naphthalen-2-yl) (E)-3-methylsulfanylprop-2-enoate	Terpenoids	Sesquiterpenoids	C19H28O3S	3	0.7448	36031-35-3	2260.73	3008.9	43.07	3171.54	3384.01	1615.47	0.618469	0.42477	0.576831	0.650188	-0.621071	insig
MEDP1136	D-Fructose-6-phosphate	Others	Saccharides	C6H13O9P	3	0.7438	643-13-0	4988.37	8750.8	4124.14	5704.51	8489.88	7331.34	0.571796	0.506502	0.64342	0.829858	-0.269063	insig
MW0013829	3,4-Dimethyl-5-pentyl-2-furanpropanoic acid	Organic acids	Organic acids	C14H22O3	3	0.7435	116627-39-5	187039	222190	231089	322007	351906	350773	1.34681	0.00218905	0.0172619	0.624892	-0.678322	insig
MW0053740	Glyceryl lactooleate	GL	MG	C24H44O6	3	0.7422	30283-16-0	337635	444571	438470	849046	845509	917462	1.36671	0.000743084	0.00912829	0.467331	-1.09748	down
MEDL02212	(-)-Epicatechin gallate	Flavonoids	Flavanols	C22H18O10	3	0.7421	1257-08-5	122.26	74.41	64.98	4798.55	5195.36	3264.19	1.39663	0.0179049	0.0661554	0.0197351	-5.66309	down
MEDN1029	Glycyl-L-phenylalanine	Amino acids and derivatives	Amino acids and derivatives	C11H14N2O3	3	0.742	3321-03-7	2241.74	605.73	1422.1	4888.75	237.33	1491.96	0.0249773	0.638139	0.745575	0.645141	-0.632313	insig
MEDP0067	2-Acetamido-2-Deoxy-D-Mannopyranose	Others	Saccharides	C8H15NO6	3	0.7411	7772-94-3 | 1136-44-3	57010.4	54112.9	51875.7	177581	179193	163101	1.40344	0.000893184	0.00983966	0.313534	-1.6733	down
MW0012992	1-Stearoyl-2-arachidonoyl-sn-glycero-3-phosphoserine	GP	PS	C44H78NO10P	3	0.7398	132014-80-3	6262.03	73676	10712.1	167647	64080	9303.62	0.569992	0.404068	0.562959	0.376094	-1.41084	insig
MEDP0658	Ethyl dodecanoate	Benzene and substituted derivatives	Benzene and substituted derivatives	C14H28O2	3	0.7395	106-33-2	1977.33	1019.21	167.13	1040.25	1233.5	1795.65	0.549356	0.63633	0.744583	0.777429	-0.363217	insig
MEDP0396	2'-Deoxycytidine-5'-monophosphate	Nucleotides and derivatives	Nucleotides and derivatives	C9H14N3O7P	3	0.7391	1032-65-1	13172.5	12940	13306	22666.6	21891.2	24833.6	1.39381	0.00701618	0.0353616	0.568061	-0.815882	insig
MEDP1278	4-Methyl-5-thiazoleethanol	Others	Others	C6H9NOS	3	0.7387	137-00-8	35375.3	46669.4	46760.8	51456.2	38876.6	55791	0.553858	0.417019	0.573467	0.881482	-0.181997	insig
MEDP1611	Glutamylglutamine	Amino acids and derivatives	Amino acids and derivatives	C10H17N3O6	3	0.7386	26848-14-6	42912	40019.9	44530.7	53393.5	50529.7	51198.5	1.32411	0.00668465	0.0343782	0.821694	-0.283327	insig
MEDN1004	Sepiapterin	Nucleotides and derivatives	Nucleotides and derivatives	C9H11N5O3	3	0.7383	17094-01-8	43.28	736.67	441.5	79.59	861.73	843.76	0.274212	0.597891	0.71225	0.684255	-0.547394	insig
MEDL02735	Pectolinarigenin	Flavonoids	Flavones	C17H14O6	3	0.7376	520-12-7	26.62	71.2	63.4	28.81	49.97	11.83	0.744666	0.255743	0.422893	1.77927	0.831289	insig
MW0006587	Cinnarizine	Benzene and substituted derivatives	Benzene and substituted derivatives	C26H28N2	3	0.7365	298-57-7	43112.2	35178.4	33221.4	39791.1	37705.7	43000.5	0.598187	0.443007	0.59009	0.925432	-0.111801	insig
MW0115424	Triethylene glycol monomethyl ether	Alcohol and amines	Alcohols	C7H16O4	3	0.7348	112-35-6	157128	170307	165381	561239	278901	263187	1.17657	0.17017	0.321521	0.446663	-1.16274	down
MW0122702	beta-Carboline	Alkaloids	Plumerane	C11H8N2	3	0.7345	244-63-3	3567.81	1299.57	2236.42	3457.41	1773.68	2301.91	0.205707	0.871308	0.912734	0.943024	-0.0846336	insig
MW0011792	1-(1Z-octadecenyl)-2-(5Z,8Z,11Z,14Z-eicosatetraenoyl)-sn-glycero-3-phosphoethanolamine	Others	Others	C43H78NO7P	3	0.7341	144371-69-7	57497.9	50592.8	2600.18	19289.4	1659.83	19516.3	0.427	0.30699	0.475157	2.73544	1.45177	insig
MEDL00970	Thymine	Nucleotides and derivatives	Nucleotides and derivatives	C5H6N2O2	3	0.7331	65-71-4	322233	332199	330716	360718	370272	365476	1.37166	0.000923952	0.0100414	0.898475	-0.154449	insig
MEDL02183	Xanthotoxol	Lignans and Coumarins	Coumarins	C11H6O4	3	0.7329	2009-24-7	104.54	1284.33	724.98	17661.5	15093.1	16563.5	1.29424	0.000461808	0.00686611	0.0428615	-4.54417	down
MEDL02248	Carnosol	Terpenoids	Ditepenoids	C20H26O4	3	0.7318	5957-80-2	639.84	444.47	577.03	3469.87	5044.94	3444.49	1.38709	0.0218983	0.0757239	0.138916	-2.84771	down
Lmsn002815	Nicotiflorin	Flavonoids	Flavonols	C27H30O15	3	0.7306	17650-84-9	1712.63	62.13	1493.53	4350.35	2046.07	77.23	0.20785	0.489439	0.630485	0.50486	-0.986043	insig
MEDN0037	Dopamine	Alkaloids	Phenolamine	C8H11NO2	3	0.7306	62-31-7	47653.2	46044.3	52877.5	7655.34	4546.53	7868.74	1.38396	0.000358782	0.00597772	7.30297	2.86848	up
MW0123213	Carbadox	Alkaloids	Alkaloids	C11H10N4O4	3	0.7306	6804-07-5	3469.75	1474.02	4217.63	4546.39	739.07	4395.57	0.128761	0.913882	0.945035	0.946325	-0.0795925	insig
MW0111434	1-(4-Hydroxy-2,6,6-trimethyl-1-cyclohexen-1-yl)-2-buten-1-one	Others	Ketone compounds	C13H20O2	3	0.7298	35734-61-3	2336.68	4212.16	4626.24	8856.29	12065	8951.02	1.27458	0.0112129	0.0483411	0.374095	-1.41852	down
MEDN1402	3,4-Dihydroxyhydrocinnamic acid	Phenolic acids	Phenolic acids	C9H10O4	3	0.7297	1078-61-1	165365	122541	126392	570709	540193	601027	1.39326	6.36925e-05	0.00229891	0.242006	-2.04688	down
MW0153300	Madecassic acid	Terpenoids	Triterpene	C30H48O6	3	0.7295	18449-41-7	805.63	621.36	1951.02	3887.86	819.02	2113.49	0.692162	0.331401	0.499331	0.495283	-1.01368	insig
MW0061638	(25S)-25,27-Dihydrophysalin A	Steroids	Steroid	C28H32O10	3	0.729	120849-18-5	843.99	93.45	23.25	70.09	1065.94	46.72	0.104896	0.871085	0.912734	0.812251	-0.300002	insig
MW0107605	Jubanine B	Benzene and substituted derivatives	Benzene and substituted derivatives	C43H47N5O6	3	0.7287	60375-08-8	825.14	230.01	226.69	568.1	21.42	433.71	0.413147	0.755739	0.832097	1.25274	0.325086	insig
MEDN1328	Hydroxyisocaproic acid	Organic acids	Organic acids	C6H12O3	3	0.7283	13748-90-8	468.87	2083.38	422.23	2530.94	804.01	1257.61	0.625151	0.512967	0.648169	0.647674	-0.626661	insig
MEDN1363	l-Alanyl-l-glutamine	Amino acids and derivatives	Amino acids and derivatives	C8H15N3O4	3	0.7276	39537-23-0	2.26	7.2	9.26	6.82	7.11	22.51	0.690483	0.377547	0.540579	0.513721	-0.960943	insig
MW0000921	[2-(Dimethoxymethyl)-1-heptenyl]benzene	Benzene and substituted derivatives	Benzene and substituted derivatives	C16H24O2	3	0.7274	91-87-2	870.72	528.71	54.53	643.03	1279.39	1404.18	0.821174	0.134993	0.276161	0.437071	-1.19406	insig
MW0061670	Phytonadiol	Terpenoids	Ditepenoids	C31H48O2	3	0.7274	572-96-3	2656.46	48.25	13773.1	123990	119788	131549	1.13963	3.43303e-05	0.00176161	0.0439027	-4.50955	down
MEDP0617	N-(2-Furoyl)glycine	Amino acids and derivatives	Amino acids and derivatives	C7H7NO4	3	0.7264	5657-19-2	127251	132286	135741	515634	478945	505446	1.40549	0.000523557	0.00749806	0.263514	-1.92405	down
MEDN0226	Erythrono-1,4-lactone	Others	Lactones	C4H6O4	3	0.7261	17675-99-9	3177.6	2336.68	3510.94	1660.05	1476.2	638.12	1.15549	0.0208157	0.0730453	2.39119	1.25773	up
MW0062070	Piperitone	Terpenoids	Terpene	C10H16O	3	0.7257	89-81-6	1.00706e+06	959785	1.23837e+06	1.14365e+06	1.04659e+06	3.21914e+06	0.655971	0.408856	0.567023	0.592528	-0.755044	insig
MEDL01830	(1E)-1,7-bis(4-hydroxy-3-methoxyphenyl)hept-1-ene-3,5-dione	Phenolic acids	Phenolic acids	C21H22O6	3	0.7254	76474-56-1	44708.3	43621.2	41532.3	7654.84	4959.81	5283.02	1.39347	8.39099e-06	0.000914391	7.25579	2.85913	up
MEDN1192	2',6'-Dihydroxyacetophenone	Phenolic acids	Phenolic acids	C8H8O3	3	0.7252	699-83-2	61687.5	66583	66983.2	57859.3	54522	62193.2	1.08652	0.0736899	0.177596	1.11845	0.161507	insig
MW0108071	Lysylproline	Amino acids and derivatives	Amino acids and derivatives	C11H21N3O3	3	0.7248	52766-27-5	12035	10423	11701.3	13194.9	14562.3	15528.5	1.23382	0.0257724	0.0848279	0.789158	-0.341614	insig
MEDN0724	Aspirin	Organic acids	Organic acids	C9H8O4	3	0.7246	50-78-2	219.02	348.75	130.58	12320.9	11190.5	12015.2	1.39277	0.000585745	0.00798789	0.0196571	-5.6688	down
FDATN00564	Nordihydroguaiaretic acid	Benzene and substituted derivatives	Benzene and substituted derivatives	C18H22O4	3	0.7216	500-38-9 | 27686-84-6	1481.51	952.72	1614.35	1016.63	182.79	168.54	1.06981	0.0670315	0.166526	2.95957	1.56539	up
MEDP1286	Geranyl acetate	Others	Lactones	C12H20O2	3	0.7209	105-87-3	1482.57	2276.39	2668.3	19297.5	18217.5	19303	1.38905	4.81011e-06	0.000775775	0.11312	-3.14407	down
MEDN1709	2-Octanamidoacetic acid	Amino acids and derivatives	Amino acids and derivatives	C10H19NO3	3	0.7201	14246-53-8	656.21	1160.5	1365.71	5112.8	1991.92	4079.33	1.21357	0.0940691	0.212492	0.28455	-1.81325	down
MW0123795	Dyphylline	Alkaloids	Alkaloids	C10H14N4O4	3	0.7199	479-18-5	95981.2	81539.1	91278.3	151308	158016	158684	1.38412	0.000690043	0.00877682	0.574347	-0.800006	insig
MW0137290	Aflatoxin M1	Heterocyclic compounds	Heterocyclic compounds	C17H12O7	3	0.7194	6795-23-9 | 25325-49-9	211.29	6050.01	104.11	907.34	234.31	373.02	0.0918516	0.497408	0.636884	4.20251	2.07125	insig
MW0138724	Kuwanon L	Flavonoids	Other Flavonoids	C35H30O11	3	0.7186	88524-65-6	6591.83	8147.32	9084.64	1678.9	3934.69	1894.36	1.27752	0.00600694	0.032122	3.17314	1.66591	up
MEDN0084	Benzoic acid	Phenolic acids	Phenolic acids	C7H6O2	3	0.7181	65-85-0	6751.76	5498.73	2775.18	2197.77	460.52	2089.81	1.04808	0.0818293	0.191131	3.16456	1.66201	up
MW0001818	2-(3,4-Dihydroxyphenylethyl)-6-epi-elenaiate	Phenolic acids	Phenolic acids	C19H22O8	3	0.7178	50915-70-3	782.39	711.21	218.39	967.93	1082.6	1122.38	0.950602	0.102678	0.22678	0.539565	-0.890132	insig
MEDL00917	LPE(0:0/20:4)	GP	LPE	C28H50NO7P	3	0.7167	83799-24-0	134805	103726	114707	164301	171827	192944	1.28652	0.00947152	0.042861	0.667657	-0.582822	insig
MW0009375	Phenbenzamine	Benzene and substituted derivatives	Benzene and substituted derivatives	C17H22N2	3	0.7157	961-71-7	1894.7	2033.09	2623.75	5309.71	5218.1	5552.05	1.37332	0.0014727	0.0130863	0.407438	-1.29535	down
MEDN1386	Erythritol	Others	Saccharides	C4H10O4	3	0.7154	149-32-6	111442	120845	72445.8	114406	124062	111362	0.625375	0.418927	0.574156	0.871087	-0.199112	insig
MEDP0150	2'-Deoxyinosine	Nucleotides and derivatives	Nucleotides and derivatives	C10H12N4O4	3	0.715	890-38-0	170.07	387.45	90.73	304.55	674.75	413.95	0.953016	0.156497	0.305472	0.465279	-1.10383	insig
MW0011264	(3R,7R)-1,3,7-Octanetriol	FA	Others	C8H18O3	3	0.7142	217650-11-8	47630.4	43532.2	74500.7	66020.8	64669.6	62759.8	0.678229	0.441105	0.589206	0.856362	-0.223707	insig
MEDL02722	Polydatin	Others	Stilbene	C20H22O8	3	0.714	27208-80-6	167512	139980	141666	9862.44	10520.6	11921.7	1.40421	0.00394849	0.0244246	13.9038	3.79741	up
MEDP1645	Benzamide	Phenolic acids	Phenolic acids	C7H7NO	3	0.7134	55-21-0	172079	179341	177691	357033	359662	354052	1.40576	8.58907e-07	0.000373296	0.494152	-1.01697	down
MEDP0653	2-Propenoic acid, 3-phenyl-, phenylmethyl ester	Benzene and substituted derivatives	Benzene and substituted derivatives	C16H14O2	3	0.7127	103-41-3 | 8014-16-2	418.44	124.06	134.95	10.41	11.89	45.89	1.24914	0.167892	0.319311	9.93474	3.31248	up
MEDN0052	N6-Acetyl-L-lysine	Amino acids and derivatives	Amino acids and derivatives	C8H16N2O3	3	0.7121	692-04-6	10114.8	11126.7	10631.5	10073.4	12652.9	9712.62	0.0904091	0.861217	0.906242	0.982555	-0.0253896	insig
MEDP0654	2-Phenylacetamide	Alkaloids	Alkaloids	C8H9NO	3	0.7114	103-81-1	430332	407674	421368	602699	567785	593236	1.39315	0.000452555	0.00678328	0.714044	-0.485915	insig
MW0011884	PE(18:2(9Z,12Z)/18:2(9Z,12Z))	GP	PE	C41H74NO8P	3	0.7109	20707-71-5	1093.89	3024.34	401.53	11470.2	2141.9	10962.6	1.04261	0.150884	0.297515	0.183919	-2.44286	down
MEDL02655	Albanol B	Flavonoids	Flavones	C34H22O8	3	0.7108	87084-99-9	101.64	2322.83	54.81	64.52	2461.67	90.6	0.0141476	0.968526	0.979277	0.947451	-0.0778769	insig
MEDN1492	(R)-mandelic Acid	Organic acids	Organic acids	C8H8O3	3	0.7106	611-71-2	1982.69	2272.13	1432.71	12107	3464.08	1650.83	0.778228	0.355471	0.52024	0.330251	-1.59837	insig
MEDN0477	2-Oxovaleric acid	Organic acids	Organic acids	C5H8O3	3	0.7106	1821-02-9	164.24	210.22	189.82	3199.13	3309.28	2553.74	1.40253	0.00671169	0.0344733	0.0622678	-4.00537	down
MEDL02650	Cyclomorusin	Flavonoids	Other Flavonoids	C25H22O6	3	0.71	62596-34-3	3531.51	12092.3	14645.1	2060.38	2858.11	2800.57	1.12293	0.154035	0.301815	3.92132	1.97134	up
MEDN0060	N-Isovaleroylglycine	Amino acids and derivatives	Amino acids and derivatives	C7H13NO3	3	0.71	16284-60-9	37752.6	39789.4	27665.2	36893.5	37408.1	36672.3	0.391171	0.659311	0.760612	0.948036	-0.076986	insig
MEDL01930	Bis-ferulamidobutane	Alkaloids	Phenolamine	C24H28N2O6	3	0.7099	42369-86-8	539.42	930.19	203.92	103.13	1697.48	179.07	0.282763	0.868506	0.911073	0.845354	-0.242373	insig
MEDL02562	Euscaphic acid	Terpenoids	Triterpene	C30H48O5	3	0.7095	53155-25-2	2644.08	7523.87	5454.42	11022.4	7045.11	6247.31	0.810616	0.229539	0.391168	0.642504	-0.638222	insig
MW0130099	Leukoefdin	Benzene and substituted derivatives	Benzene and substituted derivatives	C15H14O8	3	0.7092	491-52-1 | 12764-74-8	43.25	52.01	101.5	174.47	21.4	23.78	0.294767	0.897799	0.932947	0.895789	-0.15877	insig
MEDP0129	Phenethylamine	Alkaloids	Alkaloids	C8H11N	3	0.7087	64-04-0	13364.5	12441.1	9605.55	4314.67	2840.07	4715.58	1.33337	0.00885299	0.0411236	2.98317	1.57685	up
MW0113144	4-O-Methyl-a-D-glucosyl-(1->2)-b-D-xylosyl-(1->4)-D-xylose	Others	Saccharides	C17H28O15	3	0.7084	10365-86-3	6073.74	4342.28	6003.08	3246.32	3134.93	4942.83	1.01635	0.105267	0.231805	1.44993	0.535981	insig
MW0011239	Dihydroroseoside	Others	Ketone compounds	C19H32O8	3	0.7071	142235-28-7	16736	19002.3	14839.6	718.54	5801.9	4329.92	1.14932	0.00282199	0.0197883	4.6614	2.22076	up
MEDP0178	Uracil	Nucleotides and derivatives	Nucleotides and derivatives	C4H4N2O2	3	0.7068	66-22-8	16127.8	17076.8	19297.1	17924	16962.7	16843.3	0.152986	0.816434	0.873598	1.01492	0.0213621	insig
MW0124719	L-Tryptophanamide	Alcohol and amines	Amines	C11H13N3O	3	0.7064	20696-57-5	20777	18514.9	24189.7	19665.9	22227.1	20019.8	0.166229	0.794696	0.858579	1.02534	0.0360998	insig
MEDL02217	Moupinamide	Alkaloids	Phenolamine	C18H19NO4	3	0.7061	66648-43-9	10872.9	10331.2	4721.1	9587.06	16066.7	4476.66	0.133985	0.740729	0.819116	0.860433	-0.216864	insig
MEDL00926	Paraxanthine	Nucleotides and derivatives	Nucleotides and derivatives	C7H8N4O2	3	0.7048	611-59-6	55163.7	67229.3	23203	244813	272526	141649	1.26312	0.0392493	0.113711	0.220939	-2.17828	down
MW0001678	1-nitrosonaphthalene	Benzene and substituted derivatives	Benzene and substituted derivatives	C10H7NO	3	0.7045	21711-65-9	1760.22	1674.92	530.56	502.06	848.47	513.36	0.85621	0.213633	0.373857	2.12765	1.08926	insig
MEDL01767	Damascenone	Others	Ketone compounds	C13H18O	3	0.7044	23696-85-7	387.7	2095.15	2745.36	5563.64	5473.85	6133.55	1.08134	0.022544	0.0768363	0.304478	-1.71559	down
MEDL01832	(-)-Arctigenin	Lignans and Coumarins	Lignans	C21H24O6	3	0.7042	7770-78-7	3149.09	1677.39	1348.31	1037.04	783.64	3887.47	0.333728	0.899664	0.934187	1.08175	0.113367	insig
MW0005946	Acetohexamide	Alcohol and amines	Amines	C15H20N2O4S	3	0.7036	968-81-0	84.1	185.73	39.42	65.32	484.68	32.06	0.125319	0.602163	0.716201	0.531303	-0.912394	insig
MEDP1061	o-Tyrosine	Amino acids and derivatives	Amino acids and derivatives	C9H11NO3	3	0.703	2370-61-8	17092.4	3118.24	20905.5	163529	159843	140734	1.2839	0.000143463	0.00354873	0.0885921	-3.49668	down
MEDP0652	Methyl cinnamate	Benzene and substituted derivatives	Benzene and substituted derivatives	C10H10O2	3	0.7021	103-26-4 | 1754-62-7	11821.8	7014.21	8228.93	1320.24	1321.77	7458.1	1.0436	0.0943212	0.212492	2.67967	1.42205	up
MW0124481	Isoniazid	Heterocyclic compounds	Heterocyclic compounds	C6H7N3O	3	0.7015	54-85-3	58256.7	56974.2	55626.3	52010.6	32688	18924	0.991284	0.143761	0.287577	1.64884	0.721451	insig
MW0118570	2-Hexylbenzothiazole	Benzene and substituted derivatives	Benzene and substituted derivatives	C13H17NS	3	0.7007	65718-88-9	6714.22	6649.38	3711.46	296.36	3183.4	176.56	1.10292	0.0327239	0.0999119	4.67001	2.22343	up
MEDP0369	Pyridoxamine	Alkaloids	Alkaloids	C8H12N2O2	3	0.7007	85-87-0	60769	65078.7	62177.6	17351	30202.3	28428.9	1.31661	0.00694661	0.0352311	2.4746	1.30719	up
MW0138571	Meloside A	Flavonoids	Flavones	C27H30O15	3	0.7002	60767-80-8 | 189033-11-2	1777.5	9313.64	2051.44	29174.9	33419.6	46245.4	1.27939	0.012542	0.0518423	0.120751	-3.04989	down
MEDN0842	L-Methionine sulfoximine	Amino acids and derivatives	Amino acids and derivatives	C5H12N2O3S	3	0.6989	15985-39-4	36455.8	26983.4	28860.7	19524.6	38767.7	19044.4	0.579595	0.537531	0.667753	1.19348	0.255176	insig
MW0110126	L-Methionine, L-tryptophyl-	Amino acids and derivatives	Amino acids and derivatives	C16H21N3O3S	3	0.6985	21438-63-1	376059	352110	437881	520789	520708	531992	1.29344	0.031345	0.0967916	0.74106	-0.432338	insig
MEDL00096	2-Methylglutaric acid	Organic acids	Organic acids	C6H10O4	3	0.6982	617-62-9	661.25	3963.7	3132.56	13684.5	12586.5	12537.2	1.20292	0.00431226	0.0259896	0.199894	-2.3227	down
MW0139314	Petunidin 3-galactoside	Flavonoids	Anthocyanidins	C22H23O12+	3	0.6976	28500-02-9	7630.6	4114.14	373.84	2688.11	6247.83	5475.2	0.474913	0.767159	0.840241	0.840918	-0.249964	insig
MW0144895	Allopurinol riboside	Nucleotides and derivatives	Nucleotides and derivatives	C10H12N4O5	3	0.6968	16220-07-8	13851.2	4063.7	9555.49	4516.8	4620.2	2904.85	0.954715	0.207677	0.366778	2.28124	1.18982	insig
MEDP1660	Bis(2-ethylhexyl) adipate	Others	Lactones	C22H42O4	3	0.6961	103-23-1	921.9	267.28	1072.36	1087.56	774.51	940.68	0.529728	0.550558	0.674522	0.8069	-0.309538	insig
MW0145973	Asn-Glu	Amino acids and derivatives	Amino acids and derivatives	C9H15N3O6	3	0.6961	20917-58-2	2073.21	1758.48	2655.88	1666.55	2943.68	1369.98	0.322456	0.777925	0.846356	1.08484	0.117482	insig
MW0168377	Busulfan	Organic acids	Organic acids	C6H14O6S2	3	0.6954	55-98-1	15676.5	16387.2	16284.5	19699.8	18591.2	17520.6	1.25241	0.0458797	0.126099	0.866276	-0.207101	insig
Hmyn007168	LysoPG 16:0	Lipids	Glycerol ester	C22H45O9P	3	0.6954	116870-26-9	177992	210246	252499	284604	1.01985e+06	1.24951e+06	1.10818	0.159062	0.308056	0.250879	-1.99494	down
MW0106945	alpha-Glutamylaspartic acid	Amino acids and derivatives	Amino acids and derivatives	C9H14N2O7	3	0.6951	3918-84-1	1824.83	493.33	140.05	2098.29	9297.88	9330.87	1.13269	0.121271	0.255335	0.118599	-3.07583	down
MW0133725	4-Methylumbelliferyl acetate	Lignans and Coumarins	Coumarins	C12H10O4	3	0.6942	2747-05-9	351.13	46.57	961.2	302.36	157.14	22.95	0.495294	0.392845	0.553056	2.81666	1.49399	insig
MEDP1080	Glycyltryptophan	Amino acids and derivatives	Amino acids and derivatives	C13H15N3O3	3	0.6939	2390-74-1	41705.2	37518.9	41701.8	206100	188393	149620	1.39419	0.013221	0.0538456	0.222244	-2.16978	down
MEDN0610	2,3-Dinor-TXB2	Lipids	Free fatty acids	C18H30O6	3	0.6937	63250-09-9	72029.3	75519.5	66211.2	159670	151282	143952	1.39539	0.000382555	0.00614411	0.469901	-1.08957	down
MEDP0556	7-Methoxycoumarin	Lignans and Coumarins	Coumarins	C10H8O3	3	0.6936	531-59-9	70411	82250.2	67780.4	76666.6	68156.1	74505.3	0.0275764	0.946626	0.96873	1.00508	0.00730676	insig
MW0109774	Suberylglycine	Amino acids and derivatives	Amino acids and derivatives	C10H17NO5	3	0.6935	60317-54-6	136685	170537	176100	250235	246336	218517	1.2797	0.00911978	0.0419281	0.675893	-0.565133	insig
MW0121600	5-Methoxytryptophol	Amino acids and derivatives	Amino acids and derivatives	C11H13NO2	3	0.693	712-09-4	153409	70301.2	89412.3	241265	215068	231505	1.2307	0.0295506	0.0931572	0.455227	-1.13534	down
MW0009727	Deprenyl	Benzene and substituted derivatives	Benzene and substituted derivatives	C13H17N	3	0.6922	14611-51-9	166600	206990	224499	265663	299113	239293	1.13379	0.0479134	0.129743	0.743828	-0.426959	insig
MW0103416	6-Methylthiopurine 5'-monophosphate ribonucleotide	Nucleotides and derivatives	Nucleotides and derivatives	C11H15N4O7PS	3	0.691	7021-52-5	9631.57	8584.84	38817.8	148714	138308	216888	1.29761	0.0157848	0.0612555	0.113183	-3.14327	down
MEDP0812	5-Methyl-2-furancarboxaldehyde	Others	Aldehyde compounds	C6H6O2	3	0.6903	620-02-0	3389.1	539.68	485.87	129404	133446	7019.49	1.21232	0.166487	0.317538	0.0163585	-5.93382	down
MW0113976	beta-CYCLODEXTRIN	Others	Saccharides	C42H70O35	3	0.6902	7585-39-9 | 37331-89-8 | 79647-56-6	1223.37	442.38	13935.2	10699	13923	20102.1	0.973539	0.146805	0.291062	0.348827	-1.51942	insig
MEDL02307	p-Coumaroylagmatine	Alkaloids	Phenolamine	C14H20N4O2	3	0.6893	7295-86-5	452261	451910	439872	437327	436588	443034	0.990575	0.143389	0.287206	1.02057	0.0293801	insig
MEDN0040	Glyc-Pro	Amino acids and derivatives	Amino acids and derivatives	C7H12N2O3	3	0.689	704-15-4	180.65	321.62	174.44	181.36	145	105.79	0.912452	0.226782	0.388439	1.56591	0.647006	insig
MEDP1644	Aniline	Alkaloids	Alkaloids	C6H7N	3	0.6888	62-53-3	79922.1	67703.3	55437.2	60931.8	48022.8	65868.3	0.64687	0.351513	0.515945	1.16153	0.216031	insig
MEDN0689	2,5-Furandicarboxylic acid	Others	Lactones	C6H4O5	3	0.6883	3238-40-2	230760	187767	193799	198990	212776	195939	0.0407076	0.922585	0.951128	1.0076	0.0109288	insig
MEDP0232	N-Acetyl-D-glucosamine	Alcohol and amines	Amines	C8H15NO6	3	0.6882	7512-17-6	645.44	1812.16	1500.6	571.21	330.19	68	1.06109	0.0878353	0.202488	4.08314	2.02968	up
MEDL01873	[8]-Gingerdione	Phenolic acids	Phenolic acids	C19H28O4	3	0.6876	77334-06-6	30022.5	48224.3	36470.1	2668.64	14372.4	11133.9	1.16742	0.0148351	0.0585277	4.07159	2.02559	up
MEDP0537	LPC(O-16:0/2:0)	Lipids	LPC	C26H54NO7P	3	0.6871	74389-68-7	286154	267566	310819	342618	331635	306634	1.069	0.0794364	0.186892	0.881385	-0.182156	insig
MW0010475	2,3-Dehydrosilybin	Lignans and Coumarins	Lignans	C25H20O10	3	0.6843	25166-14-7	12308.5	6825.28	17585.8	15382.2	4515.95	11486.5	0.304487	0.709524	0.796437	1.16998	0.226488	insig
MEDP1102	Carnitine C10:0	FA	CAR	C17H33NO4	3	0.6843	1492-27-9	52324	58178.5	60731.1	15432.4	14151.2	18847.3	1.39115	0.000563356	0.00784497	3.53562	1.82196	up
MEDN1606	N-Acetylarylamine	Benzene and substituted derivatives	Benzene and substituted derivatives	C8H9NO	3	0.6842	55576-55-1	1942.64	2890.88	2349.49	80.91	960.19	908.94	1.02402	0.0116575	0.0495592	3.68352	1.88108	up
MEDP1467	5-Methyl-2'-deoxycytidine	Nucleotides and derivatives	Nucleotides and derivatives	C10H15N3O4	3	0.684	838-07-3	18.33	24.72	10.89	3.71	9.95	10.14	1.01977	0.111688	0.242307	2.26639	1.18039	up
MW0109227	Phenylalanylserine	Amino acids and derivatives	Amino acids and derivatives	C12H16N2O4	3	0.6837	16053-39-7	688.49	880.38	658.83	347.03	248.61	337.51	1.33951	0.0133144	0.0541713	2.38729	1.25537	up
MW0157439	Tetrahydrofolic acid	Organic acids	Organic acids	C19H23N7O6	3	0.6828	135-16-0	287877	289339	298448	353342	353614	362346	1.39309	0.00014047	0.00354791	0.818913	-0.288217	insig
MW0005999	alpha-Hydroxyhippuric acid	Benzene and substituted derivatives	Benzene and substituted derivatives	C9H9NO4	3	0.6824	16555-77-4	24731.2	29284.2	25841.5	33482.6	27502.9	22200.5	0.160955	0.776384	0.845135	0.959981	-0.0589216	insig
MEDP0790	4-Methoxybenzaldehyde	Phenolic acids	Phenolic acids	C8H8O2	3	0.6818	123-11-5	565.08	997.73	547.48	14346.2	11119.3	13796.8	1.39277	0.00557665	0.0305313	0.0537485	-4.21763	down
MW0130752	Murrangatin	Others	Ketone compounds	C15H16O5	3	0.6798	88546-96-7 | 37126-91-3	957.66	2562.49	647.04	1203.09	2276.2	1975.49	0.577697	0.568633	0.687887	0.763952	-0.388446	insig
MEDP0247	Nicotinuric acid	Amino acids and derivatives	Amino acids and derivatives	C8H8N2O3	3	0.6797	583-08-4	135907	211618	231537	375887	347581	351639	1.24941	0.0220585	0.0760171	0.538608	-0.892692	insig
MEDP0823	L-3-Phenyllactic acid	Organic acids	Organic acids	C9H10O3	3	0.6797	20312-36-1	174198	171874	248764	262416	265148	279292	1.11593	0.101858	0.225752	0.737229	-0.439816	insig
MW0052879	Farnesol	Alcohol and amines	Alcohols	C15H26O	3	0.6795	4602-84-0	6807.82	8101.82	8290.95	13509.8	21737.9	29952.1	1.26436	0.0969047	0.21638	0.355839	-1.49071	down
MW0106832	Glutaminylalanine	Amino acids and derivatives	Amino acids and derivatives	C8H15N3O4	3	0.6789	16874-70-7	8580.58	10314.8	10979.1	22637	21132.1	22891.2	1.38109	0.000250058	0.00490236	0.448159	-1.15792	down
MEDL02246	Angelicin	Lignans and Coumarins	Coumarins	C11H6O3	3	0.6785	523-50-2	6347.88	5568.42	6273.83	4064.83	5342.42	3117.27	1.09073	0.0846972	0.196603	1.45236	0.538401	insig
MEDP1593	S-Lactoylglutathione	Organic acids	Organic acids	C13H21N3O8S	3	0.6783	25138-66-3	219.94	29036.9	25460	42.52	613.9	19983.5	0.52302	0.372637	0.536215	2.65102	1.40655	insig
MW0014757	5-Geranyloxy-7-methoxycoumarin	Lignans and Coumarins	Coumarins	C20H24O4	3	0.6772	7380-39-4	2104.38	1042.69	2562.11	2928.93	4179.79	2184.21	0.868737	0.184323	0.340288	0.614357	-0.70285	insig
MW0107319	His-Met	Amino acids and derivatives	Amino acids and derivatives	C11H18N4O3S	3	0.677	2488-11-1	337302	433853	366722	263969	292629	239249	1.24333	0.0376713	0.1106	1.42977	0.515783	insig
MW0013350	27-Norcholestanehexol	Alcohol and amines	Alcohols	C26H46O6	3	0.6767	91999-66-5	340.63	533.56	669.09	577.32	249.28	1050.06	0.109798	0.69174	0.784114	0.822355	-0.282167	insig
MW0137454	Avenanthramide A	Alkaloids	Phenolamine	C16H13NO5	3	0.6764	108605-70-5	438.91	150.88	86.8	88.44	517.73	139.21	0.0334402	0.901473	0.935468	0.907712	-0.139694	insig
MW0116932	1-deoxy-D-xylulose	Others	Saccharides	C5H10O4	3	0.6764	60299-43-6	54777.9	73616.4	67558.7	69985.7	49953.9	82177.9	0.0727012	0.861799	0.906541	0.9695	-0.0446869	insig
MEDL01954	2'-Hydroxygenistein	Flavonoids	Isoflavones	C15H10O6	3	0.6763	1156-78-1	3820.72	10509.3	5258.91	4788.94	9971.97	12791.1	0.545078	0.441315	0.589206	0.71098	-0.49212	insig
MW0009160	Noroxycodone	Benzene and substituted derivatives	Benzene and substituted derivatives	C17H19NO4	3	0.6759	57664-96-7	110388	110144	131686	176623	178095	186403	1.35298	0.00567295	0.0309518	0.650905	-0.619481	insig
MW0157012	L-Seryl-L-lysine	Amino acids and derivatives	Amino acids and derivatives	C9H19N3O4	3	0.6753	22677-61-8	656.42	936.72	214.76	2170.81	373.78	543.4	0.392288	0.543161	0.670819	0.585462	-0.772353	insig
MEDP0637	Phenylalanylproline	Amino acids and derivatives	Amino acids and derivatives	C14H18N2O3	3	0.6752	7669-65-0	10461.6	11522.9	11343	29732.3	25002.7	28096.4	1.39514	0.00496587	0.0284351	0.402355	-1.31346	down
MW0137409	Artemetin	Flavonoids	Flavones	C20H20O8	3	0.6733	479-90-3	1951.53	97.85	2441.25	2234.03	54.01	92.77	0.519956	0.526117	0.66002	1.88618	0.915465	insig
MW0127740	2-Phenylpropionate	Organic acids	Organic acids	C9H10O2	3	0.6733	492-37-5	22122.8	29357.8	27482.1	13632.9	17956.7	10622.8	1.23692	0.0157138	0.0610385	1.8706	0.903505	insig
MEDL02658	moracin N	Phenolic acids	Phenolic acids	C19H18O4	3	0.6728	135248-05-4	52322.9	54156	61225.2	52892.4	47737.3	45975.8	1.02039	0.113426	0.244225	1.14391	0.193978	insig
MW0113877	a-L-Fucopyranosyl-(1->2)-b-D-galactopyranosyl-(1->2)-D-xylose	Others	Saccharides	C17H30O14	3	0.6719	130136-27-5	1364.75	4725.43	1776.67	14716.9	16823.6	16827	1.31164	0.000899399	0.00988114	0.162647	-2.62018	down
MW0140049	Laudanidine	Alkaloids	Isoquinoline alkaloids	C20H25NO4	3	0.6719	301-21-3	6581.63	4944.77	7782.2	1489.5	954.46	909.68	1.36956	0.0189554	0.0691033	5.75751	2.52544	up
MW0117278	1-Piperidinecarboxaldehyde	Heterocyclic compounds	Heterocyclic compounds	C6H11NO	3	0.6719	2591-86-8	38388	38427.4	38071.8	41425.7	31454.5	37799.4	0.365251	0.677888	0.773406	1.03802	0.0538293	insig
MEDL02759	2-Hydroxyglutarate	Organic acids	Organic acids	C5H8O5	3	0.6717	2889-31-8	23967.1	14297.6	19242.2	11375.4	9079.21	11917.3	1.19861	0.0842836	0.195756	1.77644	0.828993	insig
MW0105439	Adouetine X	Amino acids and derivatives	Amino acids and derivatives	C28H44N4O4	3	0.6716	19542-37-1	5007.58	25968.7	5349.41	84695.2	87569.7	80795.4	1.26904	0.00584264	0.0315362	0.143546	-2.80042	down
MW0052594	Ercalcitriol	Alcohol and amines	Alcohols	C28H44O3	3	0.6715	60133-18-8	62069.1	89025.9	52438.7	118918	53967.2	43337.6	0.0261911	0.881879	0.921176	0.941315	-0.0872504	insig
MW0133699	4'-Methoxychalcone	Flavonoids	Chalcones	C16H14O2	3	0.6715	22966-19-4	17564.3	17349.8	16073.7	26996.9	23207.8	26382.7	1.35868	0.0101121	0.0446572	0.665747	-0.586955	insig
MEDP0675	2-Methylpyridine	Alkaloids	Pyridine alkaloids	C6H7N	3	0.6711	109-06-8	74.48	291.23	288.06	191.1	9.55	112.12	0.68136	0.276059	0.444005	2.09026	1.06368	insig
MW0108032	Lys-Arg	Amino acids and derivatives	Amino acids and derivatives	C12H26N6O3	3	0.6709	29586-66-1	74901.6	71962.4	72743	119904	88467.7	109217	1.25777	0.0701202	0.17166	0.691481	-0.532239	insig
MEDL02631	Cassitoroside	Quinones	Quinones	C25H32O14	3	0.6707	170384-73-3	240190	242633	237950	408749	359342	352054	1.37591	0.0169775	0.0639749	0.643465	-0.636066	insig
MEDP0587	N-Alpha-acetyllysine	Amino acids and derivatives	Amino acids and derivatives	C8H16N2O3	3	0.67	152473-69-3	23490.1	23490.7	22463.5	19625.9	20379.9	19777.7	1.36445	0.00246679	0.0183846	1.1616	0.21611	insig
MW0111406	(2E,4E)-2,4-Dodecadienal	Others	Aldehyde compounds	C12H20O	3	0.6689	21662-16-8	509.94	2282.2	2486.83	5891.68	4604.76	6596.62	1.11741	0.0101849	0.0449297	0.308837	-1.69508	down
MW0134072	Isorhamnetin 3-galactoside	Flavonoids	Flavonols	C22H22O12	3	0.6688	6743-92-6	23.77	8790.28	12348.4	16098.6	16592.9	13390.1	0.717501	0.143584	0.287453	0.45924	-1.12268	insig
MEDL02258	Nordihydrocapsaicin	Alkaloids	Phenolamine	C17H27NO3	3	0.6685	28789-35-7	7076.45	6040.25	6518.33	5682.95	5042.43	4852.99	1.22148	0.0270725	0.0881003	1.2604	0.333886	insig
MW0000095	6-Acetylmorphine	Alkaloids	Isoquinoline alkaloids	C19H21NO4	3	0.6677	2784-73-8	10907.7	10224.2	11004.5	1716.46	7180.7	6672.44	0.979387	0.0840547	0.195449	2.06405	1.04548	insig
MEDP0359	Curcumin	Phenolic acids	Phenolic acids	C21H20O6	3	0.6668	458-37-7	38.03	81.65	25.36	106.03	19.32	26.97	0.13106	0.944819	0.967371	0.952206	-0.0706546	insig
MW0010577	2,3-Bis(1,3-benzodioxol-5-ylmethyl)butane-1,4-diol	Lignans and Coumarins	Lignans	C20H22O6	3	0.6662	24563-03-9	3369.82	2487.43	7611.96	1319.43	741.21	4208.96	0.843493	0.286136	0.453636	2.14834	1.10322	insig
MW0010795	14,15-Epoxy-5,8,11-eicosatrienoic acid	Lipids	Free fatty acids	C20H32O3	3	0.6659	81276-03-1	337543	874719	415854	1.07128e+06	543092	875509	0.785948	0.27606	0.444005	0.653894	-0.612872	insig
MW0009257	Olmesartan	Benzene and substituted derivatives	Benzene and substituted derivatives	C24H26N6O3	3	0.6656	144689-63-4	181.71	79717.6	96869.5	428.43	81.83	749.88	0.903762	0.188463	0.345214	140.277	7.13214	insig
MW0056727	Paeoniflorin	Terpenoids	Monoterpenoids	C23H28O11	3	0.6648	23180-57-6	1496.07	582.84	1815.02	1213.88	1819.48	1310.88	0.367135	0.741337	0.819148	0.896343	-0.157877	insig
MEDN0067	Phenylalanylphenylalanine	Amino acids and derivatives	Amino acids and derivatives	C18H20N2O3	3	0.6648	201023-39-4	25297.8	23763	27546.9	40015.2	32859.1	38144.2	1.3083	0.0177868	0.0659159	0.690044	-0.535241	insig
MW0127884	2'-Hydroxy-4'-Methoxychalcone	Others	Ketone compounds	C16H14O3	3	0.6638	39273-61-5 | 52923-29-2	26699.5	14608.7	14007.9	18035.8	19229.2	21111.1	0.313969	0.830189	0.884261	0.947581	-0.0776788	insig
MEDP0176	Thymidine	Nucleotides and derivatives	Nucleotides and derivatives	C10H14N2O5	3	0.6636	50-89-5	93.49	407.19	369.17	1076.61	344.98	2101.04	0.96506	0.221604	0.382331	0.246932	-2.01781	insig
MW0114256	Diethylpropion	Benzene and substituted derivatives	Benzene and substituted derivatives	C13H19NO	3	0.6624	134-80-5	182.3	1318.6	482.25	10447.3	2311.43	16462.9	1.20251	0.156337	0.305472	0.0678657	-3.88117	down
MEDP0215	Quinine	Alkaloids	Quinoline alkaloids	C20H24N2O2	3	0.6621	130-95-0	205646	211744	217735	53106.4	47960	50287	1.40517	6.7104e-05	0.00235273	4.1963	2.06912	up
MEDP1683	Trileucine	Amino acids and derivatives	Amino acids and derivatives	C18H35N3O4	3	0.6619	10329-75-6	5.35827e+07	4.9778e+07	5.22887e+07	5.51772e+07	5.0961e+07	5.24716e+07	0.400482	0.585326	0.701556	0.981335	-0.0271824	insig
FDATN00011	Lenalidomide	Alcohol and amines	Amines	C13H13N3O3	3	0.6618	191732-72-6 | 443912-14-9	465.83	26959.9	28787	218251	211746	217184	1.09817	0.00142713	0.0129018	0.0868578	-3.5252	down
MW0127743	4-[(3,3-Dimethyloxiran-2-yl)methoxy]furo[3,2-g]chromen-7-one	Lignans and Coumarins	Coumarins	C16H14O5	3	0.6606	737-52-0	149.15	14.42	130.88	52.85	81.44	140.38	0.218496	0.901616	0.935468	1.07201	0.100323	insig
MEDL02688	p-Coumaroyltyramine	Alkaloids	Phenolamine	C17H17NO3	3	0.6604	36417-86-4	6541.29	8584.14	4572.36	11494.6	10558.5	6255	0.796227	0.22887	0.390789	0.695836	-0.52318	insig
MW0053479	Geranic acid	Organic acids	Organic acids	C10H16O2	3	0.66	459-80-3	12598.9	5923.23	11851	24361.1	8948.61	14274.2	0.684947	0.337869	0.504887	0.638308	-0.647676	insig
MEDP0514	Thiamine	Others	Vitamin	C12H17N4OS+	3	0.6598	70-16-6	1747.56	782.33	1372.49	31646.1	32079	31141.1	1.39194	1.67432e-07	0.000308058	0.0411356	-4.60347	down
MEDL02041	Acacetin	Flavonoids	Flavones	C16H12O5	3	0.659	480-44-4	6802.48	12163.5	15255.8	23838	23298.8	128.76	0.369429	0.640902	0.747503	0.724034	-0.465872	insig
MW0002202	2,4,6-Trihydroxybenzophenone	Others	Others	C13H10O4	3	0.6589	3555-86-0	452.27	665.04	60.41	106.98	1275.02	86.01	0.0902388	0.837817	0.888944	0.802256	-0.317865	insig
MEDP0894	3-Methoxytyramine	Phenolic acids	Phenolic acids	C9H13NO2	3	0.6588	554-52-9	61514.9	62872.3	57895.7	77797	48986.2	66355.3	0.206141	0.709765	0.796486	0.943793	-0.083457	insig
MW0049160	Dethiobiotin	Organic acids	Organic acids	C10H18N2O3	3	0.6583	533-48-2	1729.68	3633.15	3952.83	44792.4	46280.9	29923	1.37146	0.0177103	0.0656927	0.0769913	-3.69916	down
MW0007500	Levosimendan	Benzene and substituted derivatives	Benzene and substituted derivatives	C14H12N6O	3	0.6579	141505-33-1	119646	131879	110658	173176	149268	142720	1.19597	0.044147	0.123014	0.778611	-0.361025	insig
MEDN0260	3-Indolebutyric acid	Alkaloids	Plumerane	C12H13NO2	3	0.6579	133-32-4	9910.96	11161.7	15233.9	10203.9	4516.71	14387.9	0.548894	0.515253	0.650234	1.24729	0.318794	insig
MEDP0051	L-cystathionine	Amino acids and derivatives	Amino acids and derivatives	C7H14N2O4S	3	0.6577	56-88-2	67896.2	67424.6	66251.1	81862.6	70033.7	75813.9	1.1206	0.122604	0.257317	0.885212	-0.175905	insig
FDATN01492	DL-Methionine	Amino acids and derivatives	Amino acids and derivatives	C5H11NO2S	3	0.6566	59-51-8	464.39	82.11	28.94	150.63	181.18	1595.82	0.679965	0.447567	0.594005	0.298522	-1.74409	insig
MW0052730	Ethyl isovalerate	Others	Lactones	C7H14O2	3	0.6566	108-64-5	385.96	800.59	635.99	1819.44	589.26	2275.1	0.937023	0.193622	0.351074	0.389116	-1.36173	insig
MW0146370	Asp-Trp	Amino acids and derivatives	Amino acids and derivatives	C15H17N3O5	3	0.6566	71835-79-5	82057.7	77655.4	80274.3	88324.5	87821.5	80496.6	0.983722	0.146298	0.290435	0.935103	-0.0968021	insig
MW0049084	(3S,3aS,6R,8aS)-3,8-Dimethyl-5-(propan-2-ylidene)-2,3,4,5,6,8a-hexahydro-1H-3a,6-epoxyazulen-6-ol	Terpenoids	Sesquiterpenoids	C15H22O2	3	0.6566	19431-84-6	3786.92	2501.46	121.78	1948.46	1918.37	807.83	0.1998	0.652698	0.754495	1.37126	0.455499	insig
MEDL02607	Isolicoflavonol	Flavonoids	Flavonols	C20H18O6	3	0.6563	94805-83-1	6469.76	6164.22	5947.3	1215.31	555.88	2418.31	1.25179	0.00870127	0.0407973	4.4352	2.149	up
MEDL00572	1,3-Dicaffeoylquinic acid	Phenolic acids	Phenolic acids	C25H24O12	3	0.6561	19870-46-3	82236.8	92439.5	108775	110817	7346.15	147556	0.44634	0.901826	0.935468	1.06673	0.0931959	insig
MEDL02624	Piperlonguminine	Alkaloids	Alkaloids	C16H19NO3	3	0.6552	5950-12-9	80.12	73.93	53.67	93.93	2067.17	121.93	0.821354	0.400544	0.560372	0.0909843	-3.45824	insig
MEDP0781	2-Undecanone	Others	Ketone compounds	C11H22O	3	0.6545	112-12-9	37505.9	37149.2	36681.5	236453	231883	214100	1.40601	0.00126517	0.0120272	0.163146	-2.61577	down
MW0015653	Farnesyl acetate	Others	Lactones	C17H28O2	3	0.6533	4128-17-0	21912.4	31935.2	27529.9	22602.1	27712.3	44017.8	0.35852	0.588152	0.703897	0.86267	-0.21312	insig
MW0103676	Thymidine-5'-triphosphate	Nucleotides and derivatives	Nucleotides and derivatives	C10H17N2O14P3	3	0.6532	365-08-2	760.28	790.27	1138.22	9.08	968.61	629.26	0.667234	0.331328	0.499331	1.67321	0.742621	insig
MEDP0598	2'-Hydroxy-5'-methylacetophenone	Benzene and substituted derivatives	Benzene and substituted derivatives	C9H10O2	3	0.6531	1450-72-2	6475.99	5194.26	5508.53	6107.86	5891.61	6319.23	0.624432	0.43244	0.583924	0.937773	-0.0926895	insig
MW0105691	Arg-Asp	Amino acids and derivatives	Amino acids and derivatives	C10H19N5O5	3	0.6531	15706-88-4	582.52	2548.19	133.94	3312.29	3832.62	4058.38	1.03496	0.0601447	0.15358	0.291401	-1.77892	down
MEDP0576	N1-acetylspermine	Organic acids	Organic acids	C12H28N4O	3	0.6524	25593-72-0	199716	194982	211955	262908	268712	258251	1.37761	0.00130486	0.0122069	0.76804	-0.380746	insig
MW0056780	Paullinic acid	Lipids	Free fatty acids	C20H38O2	3	0.6516	17735-94-3	427387	375654	395981	713299	735297	776273	1.39217	0.00017546	0.00394577	0.538918	-0.891862	insig
MW0011150	(3b,21b)-12-Oleanene-3,21,28-triol 28-[arabinosyl-(1->3)-arabinosyl-(1->3)-arabinoside]	Terpenoids	Terpene	C45H74O15	3	0.651	243468-98-6	1441.32	467.33	1162.73	1046.42	1194.61	86.1	0.47375	0.613443	0.725551	1.31981	0.400335	insig
MEDL01840	Vanillylamine	Alkaloids	Phenolamine	C8H11NO2	3	0.6505	1196-92-5	4008.27	4325.58	2863.94	8433.08	8029.07	6839.02	1.31513	0.00354413	0.022897	0.480568	-1.05719	down
MW0013436	2-Decen-1-ol	Alcohol and amines	Alcohols	C10H20O	3	0.6503	22104-80-9	1730.06	356.3	946.4	560.45	476.01	429.67	0.705845	0.31942	0.487258	2.06855	1.04862	insig
MEDN0854	Methylglutaric acid	Organic acids	Organic acids	C6H10O4	3	0.6499	626-51-7	16673.3	16875.4	15735.7	41711.4	49027.4	27788.3	1.30626	0.0652937	0.163417	0.415807	-1.26601	down
MEDL02423	Phosphocreatine	Organic acids	Organic acids	C4H10N3O5P	3	0.6482	67-07-2	20.41	38.43	7.17	91.96	10.75	30.77	0.473469	0.461771	0.605877	0.494531	-1.01587	insig
MW0016387	Capsorubin	Others	Ketone compounds	C40H56O4	3	0.6473	470-38-2	200.42	5122.94	13246.9	242.6	25274	595.83	0.16206	0.801775	0.863048	0.711164	-0.491745	insig
MEDN0010	Citrulline	Amino acids and derivatives	Amino acids and derivatives	C6H13N3O3	3	0.6455	372-75-8	13411.3	12864	13289.8	711.72	1306.67	660.61	1.3897	2.16358e-06	0.000545221	14.7686	3.88446	up
MW0145608	Arg-Phe	Amino acids and derivatives	Amino acids and derivatives	C15H23N5O3	3	0.6438	2047-13-4	29088.4	31487.6	38637.1	38771.7	37737.8	36131.1	0.857242	0.255498	0.42272	0.880794	-0.183123	insig
MEDN1354	3-Methacrylic acid	Organic acids	Organic acids	C5H8O2	3	0.6436	541-47-9	232.09	579.83	187.89	266.23	316.63	72.08	0.531905	0.480231	0.622602	1.52657	0.610291	insig
MW0017148	cis-3-Hexenyl tiglate	Lipids	Free fatty acids	C11H18O2	3	0.6436	67883-79-8	1022.2	3715.35	304.08	747.5	1801.99	560.76	0.123692	0.608591	0.721081	1.62097	0.69686	insig
MEDP0128	Diethanolamine	Alkaloids	Alkaloids	C4H11NO2	3	0.6435	111-42-2	237895	245501	247580	286016	268606	304164	1.27129	0.0445005	0.123572	0.851174	-0.232474	insig
MW0106773	gamma-Glutamylhistidine	Amino acids and derivatives	Amino acids and derivatives	C11H16N4O5	3	0.6428	37460-15-4	17564.2	13756.7	13209.1	7931.1	5170.03	9431.51	1.22319	0.0169955	0.063983	1.97625	0.982763	insig
MEDN0571	3-Methoxybenzenepropanoic acid	Organic acids	Organic acids	C10H12O3	3	0.6417	10516-71-9	316647	346560	349847	387162	399494	417414	1.28463	0.0105584	0.0461229	0.841358	-0.249208	insig
MW0121650	5-Methyltetrahydrofolic acid	Organic acids	Organic acids	C20H25N7O6	3	0.6416	134-35-0 | 31690-09-2	250.71	515.77	220.14	603.58	602.14	256.04	0.636704	0.349811	0.514758	0.674953	-0.56714	insig
MW0103358	2-Phenylaminoadenosine	Nucleotides and derivatives	Nucleotides and derivatives	C16H18N6O4	3	0.6415	53296-10-9	653428	620470	627888	1.18812e+06	1.17043e+06	1.09711e+06	1.40033	0.00110205	0.0111185	0.550339	-0.861606	insig
MW0127200	1-Propenyl propyl disulfide	Others	Others	C6H12S2	3	0.6414	5905-46-4	85.95	119.29	38.08	74.84	82.32	56.12	0.079045	0.719428	0.803972	1.14085	0.190106	insig
MW0161672	(2S)-2-[[(4S)-4-[[(4S)-4-[[4-[[(6S)-2-amino-4-oxo-5,6,7,8-tetrahydro-1H-pteridin-6-yl]methylamino]benzoyl]amino]-4-carboxybutanoyl]amino]-4-carboxybutanoyl]amino]pentanedioic acid	Others	Others	C29H37N9O12	3	0.6407	88903-89-3	384436	397678	402523	1.87164e+06	1.74599e+06	1.80657e+06	1.4061	0.000516393	0.00743606	0.218399	-2.19496	down
MW0113920	Alpha-Trisaccharide	Others	Saccharides	C20H37NO14	3	0.6387	49777-13-1	61.14	131.04	341.5	87.98	99.17	85.56	0.559815	0.410378	0.56802	1.95695	0.968607	insig
MEDL02208	Nornicotine	Alkaloids	Pyridine alkaloids	C9H12N2	3	0.6371	494-97-3	570.35	3747.92	6133.01	2408.18	5585.86	3234.75	0.354785	0.898007	0.932947	0.930757	-0.103523	insig
MEDP1799	Quinaldic acid	Organic acids	Organic acids	C10H7NO2	3	0.637	93-10-7	685255	704058	707147	712919	721327	700817	0.812018	0.230206	0.391972	0.98192	-0.0263229	insig
MW0140528	Isobutyraldehyde oxime	Others	Aldehyde compounds	C4H9NO	3	0.6352	151-00-8 | 118063-49-3	663.04	458.85	566.25	246.96	420.9	197.97	1.15245	0.0387884	0.112758	1.94974	0.963279	insig
MEDP0528	Mesalazine	Organic acids	Organic acids	C7H7NO3	3	0.6347	89-57-6	399417	367129	395633	526505	510358	539933	1.37836	0.000564246	0.00784497	0.737051	-0.440165	insig
MEDL01817	Quercetagetin	Flavonoids	Flavonols	C15H10O8	3	0.6328	90-18-6	133.41	51.44	245.87	278.56	425.25	2529.47	1.0222	0.327368	0.494547	0.133215	-2.90818	down
MEDL01779	Ganoderic acid Mj	Terpenoids	Triterpene	C33H52O6	3	0.6318	110024-15-2	731.6	525.47	946.1	919.85	347.35	1099.42	0.0198947	0.845585	0.895325	0.930935	-0.103247	insig
MW0007582	Menadione	Others	Vitamin	C11H8O2	3	0.6317	58-27-5	227795	231601	226053	415426	409754	417725	1.40612	1.37596e-06	0.000373296	0.551488	-0.858598	insig
MEDN1303	D-Mannose 1-phosphate	Others	Saccharides	C6H13O9P	3	0.6312	27251-84-9	7556.31	6212.41	4223.23	8439.82	4849.95	10706.6	0.583737	0.378864	0.542271	0.749777	-0.415466	insig
MW0103639	Orotidylic acid	Nucleotides and derivatives	Nucleotides and derivatives	C10H13N2O11P	3	0.6302	2149-82-8	318251	315331	352918	131245	108930	126727	1.39374	0.000496078	0.00727341	2.68873	1.42692	up
MW0127088	Trimethylsilyl nonanoate	Organic acids	Organic acids	C12H26O2Si	3	0.6294	82326-11-2	59.22	310.11	270.75	664.98	500.45	431.67	1.00791	0.0383036	0.111832	0.400776	-1.31913	down
MEDP0457	5-Aminolevulinic acid	Alkaloids	Alkaloids	C5H9NO3	3	0.6274	106-60-5	654.96	377.01	395.38	2716.86	3277.4	12687	1.28753	0.217235	0.377876	0.0764052	-3.71018	down
MEDP1754	Dimethyl fumarate	Phenolic acids	Phenolic acids	C6H8O4	3	0.627	624-49-7	3667.84	2400.08	4805.04	3640.07	9089.7	2585.88	0.373301	0.546887	0.673509	0.709925	-0.494262	insig
MEDL00436	Dehydroabietic acid	Terpenoids	Ditepenoids	C20H28O2	3	0.6249	1740-19-8	453.57	2143.01	396.56	1863.93	6982.94	1568.62	0.952708	0.292619	0.460875	0.287374	-1.799	insig
MW0000524	1-Phenylethanethiol	Benzene and substituted derivatives	Benzene and substituted derivatives	C8H10S	3	0.6241	6263-65-6	300.06	646.62	547.79	526.86	505.67	583.52	0.362486	0.735205	0.815501	0.924767	-0.112838	insig
MW0000003	Cinchonan-3,9-diol, 6'-methoxy-, (8alpha,9R)-	Alkaloids	Alkaloids	C20H24N2O3	3	0.6236	78549-61-8	156.65	174.37	63.83	69.16	626.12	47.32	0.0431325	0.604878	0.718794	0.531713	-0.911281	insig
MW0017137	Nervonic acid	Lipids	Free fatty acids	C24H46O2	3	0.6226	506-37-6	107178	192719	176316	190291	192447	165798	0.578285	0.459935	0.604057	0.868155	-0.203975	insig
MEDP1339	LPC(18:1/0:0)	Lipids	LPC	C26H53NO7P	3	0.6223	3542-29-8	23348.4	14626.8	23203.4	8825.72	14887.5	16876.5	0.907815	0.144552	0.288247	1.50724	0.591912	insig
MW0105428	Acetylphosphate	Organic acids	Organic acids	C2H5O5P	3	0.6219	590-54-5	25678.2	30887.7	32855.8	28796.6	28786.4	34846.1	0.242338	0.75054	0.827502	0.967463	-0.0477212	insig
MW0054356	3,7-Dimethyl-1,6-octadien-3-ol	Alcohol and amines	Alcohols	C10H18O	3	0.6219	78-70-6	165.26	138.27	795.02	718.46	182.68	192.66	0.109398	0.99574	0.996728	1.00434	0.00625157	insig
MW0109260	Phosphonoacetate	Organic acids	Organic acids	C2H5O5P	3	0.6219	4408-78-0	1.52684e+06	1.34138e+06	1.33904e+06	307558	263765	258709	1.40143	0.00188191	0.01536	5.06879	2.34164	up
MEDP1157	3-Methylindole	Alkaloids	Plumerane	C9H9N	3	0.6212	83-34-1	237593	237120	237344	469827	478639	450680	1.40486	0.00129246	0.0121717	0.508922	-0.974483	insig
MW0108476	N-Phenylacetylphenylalanine	Amino acids and derivatives	Amino acids and derivatives	C17H17NO3	3	0.6212	738-75-0	10162	9178.99	9465.37	15934.7	10841.3	10195.5	0.88394	0.271033	0.439986	0.779153	-0.360022	insig
MEDP1810	2,2,6,6-Tetramethyl-4-piperidinone	Heterocyclic compounds	Heterocyclic compounds	C9H17NO	3	0.6206	826-36-8	33071.1	14953.6	15292.5	12861.3	9598.52	10609.7	1.02415	0.231952	0.393616	1.91467	0.937094	insig
MEDP0650	4,4'-Methylenedianiline	Alkaloids	Alkaloids	C13H14N2	3	0.619	101-77-9	9091.44	7679.57	42379.9	16738.8	20475.5	2928.53	0.300541	0.6497	0.753189	1.47351	0.559255	insig
MW0148368	D-Glucosylsphingosine	SL	SPH	C24H47NO7	3	0.6182	52050-17-6	11924	7359.76	22046.9	8913.75	30713.2	28369.3	0.579784	0.347759	0.513551	0.607838	-0.718241	insig
MW0054527	2-Palmitoyl-sn-glycero-3-phosphocholine	Lipids	LPC	C24H50NO7P	3	0.6177	66757-27-5	1.27693e+06	1.08362e+06	1.63422e+06	3.72849e+06	3.04588e+06	3.0021e+06	1.34551	0.0038364	0.0240566	0.408611	-1.2912	down
MW0115297	S-Methyl-5-thio-D-ribulose 1-phosphate	Organic acids	Organic acids	C6H13O7PS	3	0.6177	86316-83-8	833579	711140	820860	671345	619386	576101	1.22209	0.0297209	0.0934312	1.26716	0.3416	insig
MEDP1610	Proline betaine	Alkaloids	Pyrrole alkaloids	C7H13NO2	3	0.6174	471-87-4	1264.53	778.42	1719.38	1801.62	2980.77	2256.19	1.08118	0.0704764	0.172219	0.53453	-0.903658	insig
MW0015647	all-trans-5,6-Epoxyretinoic acid	Organic acids	Organic acids	C20H28O3	3	0.6156	13100-69-1	238863	828.62	240778	513542	467490	517788	0.802307	0.0460558	0.126478	0.320566	-1.64131	insig
MW0107282	Histidylalanine	Amino acids and derivatives	Amino acids and derivatives	C9H14N4O3	3	0.6142	16874-75-2	81.25	130.95	125.19	266.3	128.85	1482.79	0.891678	0.355003	0.519742	0.17966	-2.47666	insig
MW0123362	Citbismine B	Heterocyclic compounds	Heterocyclic compounds	C36H34N2O11	3	0.6139	169055-77-0	1121.01	3705.99	433.32	2619.54	1456.73	440.32	0.0189144	0.84545	0.895325	1.16467	0.219917	insig
MEDL01994	Diisobutyl phthalate	Benzene and substituted derivatives	Benzene and substituted derivatives	C16H22O4	3	0.6126	84-69-5	81.6	309.01	304.01	60.07	134.79	266	0.458687	0.465162	0.608925	1.50723	0.591895	insig
MW0107215	Guanidinosuccinic acid	Organic acids	Organic acids	C5H9N3O4	3	0.6125	6133-30-8	14609.6	19909.5	16467.8	21246.4	21126.9	20547.8	1.08189	0.12188	0.256214	0.810332	-0.303415	insig
MW0007866	Mycophenolic acid	Organic acids	Organic acids	C17H20O6	3	0.6098	24280-93-1	165016	184635	179846	183086	170899	165330	0.290539	0.689809	0.782586	1.01961	0.0280106	insig
MEDL02599	Methuyl tanshinonate	Quinones	PhenAnthraquinones	C20H18O5	3	0.6093	18887-19-9	27040.8	24784.6	18029	5694.44	7006.51	13643.5	1.22634	0.0169108	0.0638432	2.65157	1.40685	up
MEDL01768	6-O-Acetylarbutin	Phenolic acids	Phenolic acids	C14H18O8	3	0.6086	10338-88-2	55513.6	52850.3	54699	5424.18	2563	12496.1	1.3052	0.00229402	0.0177193	7.96079	2.99291	up
MEDL02603	7,3',4'-Trihydroxyflavone	Flavonoids	Flavones	C15H10O5	3	0.6083	2150-11-0 | 104666-14-0	2466.9	2213.13	3464.09	1260.83	855.04	46.29	0.963196	0.0190171	0.06925	3.76666	1.91329	insig
MW0061634	Physalin K	Steroids	Steroid	C28H30O12	3	0.6081	76045-35-7	114.94	62.26	322.17	197.56	312.52	317.3	0.811831	0.306589	0.475083	0.603556	-0.728441	insig
MW0129674	1,3-Diphenylpropan-1-ol	Alcohol and amines	Alcohols	C15H16O	3	0.6073	14097-24-6	3839.59	13572.6	10346	22378.1	40056.7	7988.45	0.81367	0.261275	0.429457	0.394162	-1.34314	insig
MW0015017	6-Geranylgeranyl 8'-methyl 6,8'-diapocarotene-6,8'-dioate	Others	Lactones	C43H60O4	3	0.6062	247030-33-7	51439.7	77209.9	55530.6	52368.3	53034.7	47829.8	0.772007	0.32517	0.492705	1.20196	0.265393	insig
MW0012238	12-Methyltridecanoic acid	Lipids	Free fatty acids	C14H28O2	3	0.603	2724-57-4	110673	116832	114748	102067	95117.3	92132.5	1.30322	0.0112649	0.0484224	1.18297	0.242412	insig
MW0103902	(3R)-3-hydroxy-3-methyl-5-(phosphonooxy)pentanoic acid	Organic acids	Organic acids	C6H13O7P	3	0.6028	73566-35-5	2163.69	2029.75	2168.49	11031.2	12102.6	13412	1.40332	0.0045066	0.0266822	0.174081	-2.52217	down
MW0102922	Tributyrin	GL	TG	C15H26O6	3	0.6028	60-01-5	35322.8	30764	20838	60141.9	78141.9	64630.9	1.30278	0.00579203	0.0313049	0.428381	-1.22303	down
MW0144360	Phosphoadenosine phosphosulfate	Nucleotides and derivatives	Nucleotides and derivatives	C10H15N5O13P2S	3	0.6023	482-67-7	30424.1	59052.3	48641.9	201921	183001	183531	1.35631	0.000262267	0.00505962	0.242972	-2.04114	down
MW0105065	3-Hydroxydecanedioic acid	Organic acids	Organic acids	C10H18O5	3	0.6017	73141-46-5 | 68812-93-1	4.42765e+06	4.60717e+06	4.6922e+06	9.27808e+06	9.73162e+06	9.27681e+06	1.40378	9.68835e-05	0.00277045	0.485285	-1.0431	down
MEDL00348	Asp-Tyr	Amino acids and derivatives	Amino acids and derivatives	C13H16N2O6	3	0.6007	22840-03-5	3993.13	5460.2	4757.27	3118.98	3476.94	3045.85	1.24822	0.0583962	0.150162	1.47386	0.559598	insig
MW0129713	Tetrahydrobisdemethoxydiferuloylmethane	Others	Ketone compounds	C19H20O4	3	0.6	113482-94-3	20.87	58.52	59.93	102.8	167.52	41.95	0.81763	0.248337	0.414637	0.446152	-1.16439	insig
MW0110101	Trp-Asp	Amino acids and derivatives	Amino acids and derivatives	C15H17N3O5	3	0.5991	71835-78-4	742.52	2355.24	85.84	3060.55	3533.07	759.37	0.735971	0.274919	0.442727	0.432967	-1.20767	insig
MEDL01956	Cajanol	Flavonoids	Isoflavones	C17H16O6	3	0.5985	61020-70-0	129.57	296.71	2352.26	32.86	1540.43	3123.04	0.076877	0.607169	0.720455	0.591641	-0.757207	insig
MEDL01745	Cichoralexin	Terpenoids	Sesquiterpenoids	C15H20O3	3	0.5971	132296-37-8	60.02	151.26	17.21	19.69	464.4	47.43	0.207758	0.560036	0.682195	0.42988	-1.21799	insig
MW0013096	2,3-Dihydrowithanolide E	Others	Lactones	C28H40O7	3	0.596	38253-76-8	14129.3	12220.7	21687.6	12422.8	9801.46	10823.8	0.962477	0.221266	0.382239	1.45356	0.539595	insig
MW0153443	(2S,3R,4R,5R)-6-[(2S,3R,4S,5R,6R)-3,4,5-trihydroxy-6-(hydroxymethyl)tetrahydropyran-2-yl]oxyhexane-1,2,3,4,5-pentol	Others	Saccharides	C12H24O11	3	0.5956	497-83-6	59861.6	50407.6	55274.1	51846	29894.2	26853.2	1.04078	0.125773	0.261535	1.52443	0.608271	insig
MEDP0672	Cyclohexylamine	Alkaloids	Alkaloids	C6H13N	3	0.5949	108-91-8	34.36	84.72	55.6	2861.2	1278	2360.35	1.38048	0.0456375	0.125604	0.0268757	-5.21755	down
MW0106105	Carbamic acid	Organic acids	Organic acids	CH3NO2	3	0.5946	463-77-4	20345.6	36888.4	23306.6	8682.65	29210.6	29495.8	0.429235	0.638051	0.745575	1.19516	0.257201	insig
MEDL01777	Ganoderic acid Mf	Terpenoids	Triterpene	C32H48O5	3	0.5935	108026-94-4	16541	42749.7	23622.9	199375	159533	186825	1.35075	0.000814907	0.00941463	0.151931	-2.71851	down
MW0109985	alpha-Carboxy-alpha-3-thienylmethylpenicillin	Heterocyclic compounds	Heterocyclic compounds	C15H16N2O6S2	3	0.5927	3973-04-4	63914.9	45026.8	49001.4	132857	82427.3	249683	1.16128	0.173217	0.325878	0.339686	-1.55772	down
MW0052578	Eplerenone	Others	Ketone compounds	C24H30O6	3	0.5925	107724-20-9	2150.73	1741.89	1150.61	4012.11	4686.32	4700.39	1.31526	0.0020521	0.0165813	0.376394	-1.40969	down
MW0127201	1-Propenyl propyl sulfide	Others	Others	C6H12S	3	0.5924	33922-70-2	61.66	147.95	138.25	119.48	180.34	146.29	0.628106	0.379224	0.542463	0.779763	-0.358893	insig
MEDL01785	3,3'-Bis(4''-hydroxyanigorufone)	Others	Ketone compounds	C38H22O6	3	0.592	190372-82-8	4149.09	4637.9	3993.38	1087.91	1339.73	776.93	1.36952	0.000272242	0.00517773	3.98817	1.99573	up
MEDP1475	N-Methylhydantoin	Heterocyclic compounds	Heterocyclic compounds	C4H6N2O2	3	0.5905	616-04-6	14686.7	3593.21	10831.3	4825.67	14137.2	14526.7	0.226092	0.764047	0.838497	0.869261	-0.202139	insig
MW0111055	Dihomo-gamma-linolenoylethanolamide	Alcohol and amines	Amines	C22H39NO2	3	0.5903	150314-34-4	166286	166966	167345	86628.4	110417	90155.1	1.35926	0.0105823	0.0461272	1.74302	0.80159	insig
MW0112868	Prenol	Alcohol and amines	Alcohols	C5H10O	3	0.5896	556-82-1	13832	21024.1	7938.63	14853.8	12892	11989.1	0.00402742	0.815126	0.872468	1.077	0.10702	insig
MW0006487	Carbanilide	Benzene and substituted derivatives	Benzene and substituted derivatives	C13H12N2O	3	0.5886	102-07-8	647.87	1039.81	509.99	810.45	724.27	1593.7	0.644912	0.398466	0.558434	0.702486	-0.509459	insig
MW0053451	Ganoderiol G	Others	Ketone compounds	C31H52O5	3	0.588	114567-48-5	161615	169984	177231	169313	176607	103086	0.561038	0.48524	0.62728	1.13324	0.18045	insig
MW0155568	Picrocrocin	Others	Others	C16H26O7	3	0.5858	138-55-6	10929.5	5503.27	672.42	31917.8	25214	29656.3	1.10343	0.00456009	0.0268759	0.197092	-2.34306	down
MW0103194	Zeinoxanthin	Terpenoids	Tetraterpenes	C40H56O	3	0.5855	24480-38-4	70394.9	85263.2	97931.9	105448	104115	86070.3	0.792479	0.242014	0.406245	0.857784	-0.221314	insig
MW0133968	5,6,7-Trimethoxyflavone	Flavonoids	Flavones	C18H16O5	3	0.5853	973-67-1	2566.67	6084.39	7966.62	5297.89	8589.36	5391.07	0.40392	0.670648	0.76929	0.861988	-0.21426	insig
MW0005981	Alitretinoin	Organic acids	Organic acids	C20H28O2	3	0.5853	5300-03-8	22328	9477.92	19071.9	52618.5	52753.2	53877.2	1.28901	0.0105814	0.0461272	0.319487	-1.64617	down
MW0153756	Met-Gln	Amino acids and derivatives	Amino acids and derivatives	C10H19N3O4S	3	0.5845	36261-62-8	23233	23630.1	24915.7	28660.7	31884.3	30216.2	1.33992	0.00862263	0.0407102	0.790852	-0.338521	insig
MW0007146	Fesoterodine	Benzene and substituted derivatives	Benzene and substituted derivatives	C26H37NO3	3	0.583	286930-03-8	642.74	464.63	440.71	14549.2	15899.4	20013.8	1.40148	0.0099222	0.0441571	0.0306778	-5.02666	down
MW0017063	Cholecalciferol	Others	Vitamin	C27H44O	3	0.5825	67-97-0	731646	323060	109848	595858	457283	1.08001e+06	0.782288	0.286196	0.453636	0.54593	-0.873212	insig
MW0013974	3beta-Acetoxy-19alpha-hydroxy-12-ursene	Others	Hydrocarbon derivatives	C32H52O3	3	0.5809	273223-68-0	80375.9	155518	155098	101193	121913	65312.7	0.639034	0.326275	0.493577	1.35564	0.438976	insig
MW0134251	Isorhapontigenin	Others	Stilbene	C15H14O4	3	0.5797	32507-66-7 | 20767-15-1	10452.3	41591.8	49203.9	22934.9	49241.5	53959.1	0.416413	0.61728	0.728806	0.802693	-0.31708	insig
MW0104093	[3-[1-Formyl-2-(2-furanyl)ethenyl]]-2-(2-furanyl)-5-(2-furanylmethylene)-4,5-dihydro-a-methyl-4-oxo-1H-pyrrole-1-acetic acid, 9CI	Organic acids	Organic acids	C23H17NO7	3	0.5794	198414-08-3	3051.79	5178.87	1804.58	343.94	970.99	200.33	1.23325	0.0948983	0.213207	6.62278	2.72744	up
MW0016178	Betulin	Terpenoids	Triterpene	C30H50O2	3	0.5791	473-98-3	459.29	2213.74	5213.09	11387	13012.5	10941.6	1.1262	0.0113509	0.0486064	0.223143	-2.16396	down
MEDP1764	Harmaline	Alkaloids	Plumerane	C13H14N2O	3	0.577	304-21-2	24977.3	20343.7	36083.1	36439.9	43405.8	27718.2	0.79428	0.251612	0.418523	0.756797	-0.402022	insig
MW0161522	6-Deoxocastasterone	Alcohol and amines	Alcohols	C28H50O4	3	0.5765	87833-54-3	253832	344300	345963	520200	492765	432628	1.2399	0.014623	0.0579174	0.653085	-0.614656	insig
MW0138703	Kavain	Others	Lactones	C14H14O3	3	0.5759	500-64-1	1.06097e+06	1.09322e+06	1.04317e+06	810038	809115	729919	1.36765	0.00224174	0.0174399	1.36111	0.444786	insig
MEDP0707	2-Pentadecanone	Others	Ketone compounds	C15H30O	3	0.5749	2345-28-0	29367.2	33827.3	30130.5	219083	77002.1	46057.3	1.07356	0.259739	0.42758	0.272767	-1.87426	down
MW0106862	Gln-Met	Amino acids and derivatives	Amino acids and derivatives	C10H19N3O4S	3	0.5746	114659-59-5	265641	249236	246267	71217.1	82833.9	74799.8	1.40197	8.70985e-05	0.00260615	3.32594	1.73376	up
MEDL01962	4-Hydroxybenzylamine	Alkaloids	Phenolamine	C7H9NO	3	0.5746	696-60-6	17044.2	17941.9	16979.3	13179.4	16120.1	20328.2	0.333692	0.74457	0.82227	1.04711	0.0664074	insig
MW0122710	9-Methyluric acid	Organic acids	Organic acids	C6H6N4O3	3	0.5745	55441-71-9	1186.64	1276.62	2138.46	991.13	1056.87	1069.15	0.968066	0.243933	0.408786	1.47626	0.561946	insig
MEDL02264	Betulafolienetriol	Alcohol and amines	Alcohols	C30H52O3	3	0.5736	6892-79-1 | 30636-90-9	13538.7	82759.6	74243.2	74901.8	76569.2	34721.6	0.310994	0.850984	0.899624	0.915942	-0.126672	insig
MW0111016	Docosahexaenoyl Ethanolamide	Alcohol and amines	Amines	C24H37NO2	3	0.5732	162758-94-3	60494.9	11536.9	54879.8	23808.9	3577.53	26097.4	0.690248	0.252027	0.418898	2.3729	1.24665	insig
MEDN0841	Ureidopropionic acid	Organic acids	Organic acids	C4H8N2O3	3	0.5731	462-88-4	686.24	1955.84	4667.24	5632.52	6105.73	6031.55	1.01887	0.0949173	0.213207	0.411334	-1.28162	down
MW0013827	3,4-Dimethyl-5-pentyl-2-furanpentadecanoic acid	Organic acids	Organic acids	C26H46O3	3	0.5725	116627-42-0	231173	291494	293553	418742	372797	338531	1.20197	0.0284986	0.091411	0.722275	-0.46938	insig
MW0105167	FAPy-adenine	Heterocyclic compounds	Heterocyclic compounds	C5H7N5O	3	0.5722	5122-36-1	6985.44	6358.09	3637.8	184.16	360.7	465.39	1.36806	0.034566	0.103775	16.809	4.07117	up
MEDP1807	Thymoquinone	Quinones	Quinones	C10H12O2	3	0.5716	490-91-5	6177.06	6092.75	6825.86	7548.82	14082.3	19116.9	1.09728	0.163315	0.313117	0.468628	-1.09348	down
MEDN0036	L-Alanyl-L-alanine	Amino acids and derivatives	Amino acids and derivatives	C6H12N2O3	3	0.5713	1948-31-8	104.23	86.74	537.12	332.27	111.22	101.43	0.0864313	0.736777	0.816571	1.33614	0.418072	insig
MW0013548	2''-Methoxy-(S)-oleuropein	Phenolic acids	Phenolic acids	C26H34O14	3	0.5685	256498-10-9	700.56	560.21	812.03	2952.63	592.92	3876.26	0.915242	0.209162	0.368916	0.279285	-1.84019	insig
MEDP1476	5-Methoxytryptamine	Alkaloids	Plumerane	C11H14N2O	3	0.5676	608-07-1	35085	104003	48781.8	83922.4	83975.1	73356.4	0.674837	0.488357	0.630076	0.778724	-0.360816	insig
MW0116275	1-(2,3-Dihydro-1H-pyrrolizin-5-yl)-1-butanone	Others	Ketone compounds	C11H15NO	3	0.5674	97072-99-6	627.19	1414.24	1358.96	348.88	453.74	493.99	1.19412	0.105766	0.232398	2.62252	1.39096	up
MW0103558	Faicar	Nucleotides and derivatives	Nucleotides and derivatives	C10H15N4O9P	3	0.5662	13018-54-7	149868	105553	113422	362541	157925	268103	1.13094	0.135352	0.276603	0.467738	-1.09623	down
MEDL02612	Licoricone	Flavonoids	Isoflavones	C22H22O6	3	0.5643	51847-92-8	2315.13	658.04	2086.37	8099.36	11038.3	11469.8	1.29043	0.00607693	0.0321974	0.165304	-2.59681	down
MEDL02219	5,7-Dihydroxy-3',4',5'-trimethoxyflavone	Flavonoids	Flavones	C18H16O7	3	0.5641	18103-42-9	175.56	23.4	149.43	34.79	344.48	86.38	0.130516	0.739122	0.818469	0.74818	-0.418543	insig
MEDL02184	Bergapten	Lignans and Coumarins	Coumarins	C12H8O4	3	0.5634	484-20-8	1095.12	1244.98	474.58	3762.75	1649.26	3451.21	1.16078	0.0786803	0.18552	0.317569	-1.65486	down
MEDN1569	Piperlongumine	Alkaloids	Pyridine alkaloids	C17H19NO5	3	0.56	20069-09-4	12469.1	12453.2	12013.3	10128.2	10090.3	10441.3	1.38573	0.00054465	0.00765166	1.20469	0.268664	insig
MW0116619	1,3,5-Trithiane	Heterocyclic compounds	Heterocyclic compounds	C3H6S3	3	0.5595	291-21-4	9273.66	16800.2	27004.2	22862.5	28406.1	19121	0.674713	0.392765	0.553056	0.754061	-0.407246	insig
MW0005721	5-Nonadecyl-1,3-benzenediol	Phenolic acids	Phenolic acids	C25H44O2	3	0.5587	35176-46-6	67391.2	113072	83490.2	119518	122278	120361	1.05217	0.133669	0.274277	0.728836	-0.456334	insig
MW0112809	3'-Fucosyllactose	Others	Saccharides	C18H32O15	3	0.5582	41312-47-4	1478.36	824.64	1814.38	480973	670802	677026	1.40164	0.011004	0.0476565	0.00225141	-8.79496	down
MEDN0530	Pimelic acid	Organic acids	Organic acids	C7H12O4	3	0.557	111-16-0	39.59	32.35	39.77	45.33	143.98	46.72	0.85891	0.331954	0.499732	0.473287	-1.07921	insig
MEDL02627	Melilotocarpan D	Phenolic acids	Phenolic acids	C17H16O6	3	0.5552	83013-81-4	1069.6	981.05	193.94	29.32	833.23	829.85	0.416453	0.658353	0.759726	1.32628	0.407381	insig
MW0106039	Betonicine	Heterocyclic compounds	Heterocyclic compounds	C7H13NO3	3	0.5538	515-25-3	225133	227843	181338	209032	197182	213563	0.164399	0.784114	0.850199	1.02345	0.0334459	insig
MW0105968	Aspartyl-L-proline	Amino acids and derivatives	Amino acids and derivatives	C9H14N2O5	3	0.5528	42155-95-3	15154.4	14239.2	18856	20106.4	20318.8	17990.8	1.02009	0.122749	0.25737	0.825964	-0.275849	insig
MEDP0716	cis-Citral	Others	Aldehyde compounds	C10H16O	3	0.5524	106-26-3	1136.08	732.81	705.74	1574.3	133.08	90.69	0.748336	0.654149	0.755738	1.43189	0.517916	insig
MW0104839	2-Phosphoglycolic Acid	Organic acids	Organic acids	C2H5O6P	3	0.5522	13147-57-4	1986.77	1360.97	606	4791.35	5693.15	5217.25	1.27063	0.00222729	0.0174378	0.251803	-1.98964	down
MW0130726	2-Benzylideneheptanal	Others	Aldehyde compounds	C14H18O	3	0.5486	122-40-7	28549.2	19062.9	59653.7	181892	208885	220504	1.32089	0.000571059	0.00788596	0.175477	-2.51065	down
MW0105659	Arginylhistidine	Amino acids and derivatives	Amino acids and derivatives	C12H21N7O3	3	0.5458	155114-05-9	18.13	274.89	89.29	2795.12	50.63	53.88	0.413965	0.455813	0.601387	0.131848	-2.92305	insig
MW0013826	3,4-Dimethyl-5-pentyl-2-furanoctanoic acid	Organic acids	Organic acids	C19H32O3	3	0.5434	142937-54-0	153298	179791	183813	41088.8	67986	41845.7	1.35577	0.00074697	0.00912829	3.425	1.7761	up
MW0105314	5-Hydroxylysine	Amino acids and derivatives	Amino acids and derivatives	C6H14N2O3	3	0.5408	1190-94-9	563424	548036	561405	549932	554714	530181	0.810892	0.24009	0.403996	1.02327	0.033182	insig
MW0106839	Gln-Asp	Amino acids and derivatives	Amino acids and derivatives	C9H15N3O6	3	0.5405	286966-95-8	3038.8	4571.87	6856.32	5107.1	535.14	2772.43	0.715121	0.308672	0.476732	1.71926	0.781786	insig
MEDL02748	Auraptene	Lignans and Coumarins	Coumarins	C19H22O3	3	0.5398	495-02-3	252503	196322	176416	249810	308765	275615	1.08313	0.075684	0.181025	0.749518	-0.415965	insig
MW0169164	Flavone	Flavonoids	Flavones	C15H10O2	3	0.5384	525-82-6	67467	66496.9	72779.6	57347.6	63744.1	51698.2	1.13566	0.0622701	0.157511	1.1965	0.258823	insig
MW0123692	2,4-Dihydroxy-7-methoxy-1,4-benzoxazin-3-one	Alkaloids	Alkaloids	C9H9NO5	3	0.5366	15893-52-4	4673.65	4072.4	5877.27	3047.46	3768.65	3936.27	1.05641	0.119627	0.252665	1.36001	0.443615	insig
MEDP0156	5-Methyluridine	Nucleotides and derivatives	Nucleotides and derivatives	C10H14N2O6	3	0.5324	1463-10-1	745314	809934	684727	640641	622879	703886	1.02184	0.115603	0.247388	1.13854	0.187188	insig
MEDN0553	2-Methylbenzoic acid	Phenolic acids	Phenolic acids	C8H8O2	3	0.5324	118-90-1	10648.7	9041.85	6253.37	6757.03	3821.28	7053.98	0.870513	0.171154	0.322624	1.47139	0.557178	insig
MW0013003	1-Stearoyl-2-linoleoyl-sn-glycero-3-phosphoethanolamine	GP	PE	C41H78NO8P	3	0.5322	7266-53-7	429.87	983.38	2144.47	1684.17	26.41	1932.92	0.359336	0.97267	0.982417	0.976457	-0.034372	insig
MW0114026	Butanal	Others	Aldehyde compounds	C4H8O	3	0.5293	123-72-8	210785	205510	74842.8	449081	472209	441119	1.20135	0.0190707	0.0692988	0.360492	-1.47196	down
MW0109182	Phenylalanyllysine	Amino acids and derivatives	Amino acids and derivatives	C15H23N3O3	3	0.5278	6456-72-0	2997.48	5715.75	6794.63	36044.5	33321.3	35646.1	1.3633	5.27642e-05	0.00207692	0.147677	-2.75948	down
MW0134506	5-Hydroxyflavone	Flavonoids	Flavones	C15H10O3	3	0.5269	491-78-1 | 66585-06-6	17148.8	15892.8	16344	7228.37	15677.1	5972.18	1.02428	0.152219	0.299096	1.71017	0.774136	insig
MEDL02647	moracin I	Phenolic acids	Phenolic acids	C20H20O4	3	0.523	73338-88-2	813.03	1102.77	190.82	927.17	1386.28	188.36	0.10033	0.78076	0.848038	0.842038	-0.248042	insig
MEDP1005	β-Alanine	Amino acids and derivatives	Amino acids and derivatives	C3H7NO2	3	0.5227	107-95-9	98251.5	119741	91218.3	79040.1	91726.6	112482	0.466654	0.542142	0.670321	1.09166	0.126519	insig
MEDP0298	Aminocaproic acid	Organic acids	Organic acids	C6H13NO2	3	0.5207	60-32-2	133.11	1633.67	4487.68	4025.1	3253.36	1860.98	0.629689	0.549358	0.673733	0.684337	-0.54722	insig
MW0112851	3-Ketolactose	Others	Saccharides	C12H20O11	3	0.5164	15990-62-2	155.57	75.34	529.8	3538.35	4487.12	887.78	1.2114	0.125384	0.260995	0.085346	-3.55053	down
MW0010883	(1R,3R,4R,5S,6S,8x)-1-Acetoxy-8-angeloyloxy-3,4-epoxy-5-hydroxy-7(14),10-bisaboladien-2-one	Others	Ketone compounds	C22H30O7	3	0.5151	348113-03-1	150.15	1963.46	1068.77	570.03	596.35	53.88	0.552422	0.338566	0.505405	2.60795	1.38292	insig
MW0003454	3-(3,4-dimethoxyphenyl)-N-[2-(3,4-dimethoxyphenyl)ethyl]propanamide	Benzene and substituted derivatives	Benzene and substituted derivatives	C21H27NO5	3	0.5119	20944-13-2	13452.7	212.85	11986.8	148.03	63.75	77.91	1.11205	0.181134	0.33687	88.5512	6.46844	up
MW0055437	Octadecanedioic acid	Lipids	Free fatty acids	C18H34O4	3	0.5042	871-70-5	88497.6	57447.5	66455.9	72576.8	29271.6	71080.2	0.535767	0.486994	0.628742	1.22826	0.296614	insig
MW0012860	3-Palmitoyl-sn-glycerol	GL	MG	C19H38O4	2	0.9548	-	119460	300702	157835	509170	294121	201656	0.828006	0.266245	0.434967	0.575152	-0.797984	insig
MW0138670	kaempferol 7-O-glucoside	Flavonoids	Flavonols	C21H20O11	2	0.9389	-	669.61	812.02	1061.68	1589.76	1635.01	1565.13	1.30025	0.0199407	0.0711512	0.530974	-0.913288	insig
MW0015194	cis-7-Hexadecenoic Acid methyl ester	Organic acids	Organic acids	C17H32O2	2	0.9259	-	1203.04	1342.52	1050.14	11354.3	18063.1	16816	1.3954	0.0202254	0.0716258	0.0777728	-3.68459	down
MW0103681	Uridine-5'-diphosphogalactose disodium salt	Nucleotides and derivatives	Nucleotides and derivatives	C15H24N2O17P2	2	0.9231	-	5842.97	21967.6	6124.93	59496.1	46196.8	69428.7	1.26244	0.00624722	0.032769	0.193783	-2.36749	down
MW0110307	L-Tyrosyl-L-Threonine	Amino acids and derivatives	Amino acids and derivatives	C13H18N2O5	2	0.9223	-	1407.18	2685.66	942.64	187.2	334.13	135.11	1.30584	0.105473	0.232134	7.67089	2.93939	up
MW0139305	Peonidin-3-O-beta-galactopyranoside	Flavonoids	Anthocyanidins	C22H23O11+	2	0.9187	-	33486.4	26269.5	57781.4	39613.7	36246.7	443.57	0.614244	0.43526	0.585709	1.54038	0.623288	insig
MW0015479	12(13)Ep-9-KODE	Lipids	Free fatty acids	C18H30O4	2	0.9098	-	71985.8	23748.3	37736.2	315676	437018	284639	1.33831	0.0162246	0.0623462	0.128667	-2.95829	down
MW0011789	1-(1Z-hexadecenyl)-sn-glycero-3-phosphocholine	GP	PC	C24H50NO6P	2	0.9067	-	190130	138256	147359	367036	415602	443392	1.3694	0.00125897	0.0120114	0.388037	-1.36573	down
MW0134494	Naringenin 7-0-glucoside	Benzene and substituted derivatives	Benzene and substituted derivatives	C21H22O10	2	0.8992	-	6194.28	5557.37	49.29	159.58	7430.19	8616.28	0.201167	0.679948	0.774681	0.728181	-0.457631	insig
MW0123204	Cannabinol	Phenolic acids	Phenolic acids	C21H26O2	2	0.8972	-	35.87	3898.45	60.13	45556.1	16656.6	16172.8	1.18291	0.122902	0.257557	0.050959	-4.29452	down
MW0108413	N-Phenethylacetamide	Benzene and substituted derivatives	Benzene and substituted derivatives	C10H13NO	2	0.8862	-	125.18	143.69	96.46	58.49	95.92	290.25	0.0319978	0.750195	0.827349	0.821594	-0.283502	insig
MW0130459	Methyl 2,5-dihydroxycinnamate	Organic acids	Organic acids	C10H10O4	2	0.8823	-	35775.2	9449.95	33813.8	16026	45337.1	44381.3	0.418217	0.525991	0.66002	0.747452	-0.419947	insig
MW0143452	Azacyclonol	Benzene and substituted derivatives	Benzene and substituted derivatives	C18H21NO	2	0.8784	-	1945.81	2109.19	782.09	11002.3	16636.4	13661.9	1.34504	0.0131434	0.0536922	0.117119	-3.09395	down
MW0131331	3-(4-Hydroxy-3-methoxyphenyl)-2-propenoic acid	Organic acids	Organic acids	C10H10O4	2	0.8643	-	30198.2	32403	33401.7	31062.8	31013.5	27908.4	0.808225	0.228154	0.390125	1.06688	0.0933982	insig
MW0054380	Ethyl alpha-linolenate	Lipids	Free fatty acids	C20H34O2	2	0.8636	-	146840	143534	146444	141821	146134	149842	0.0803942	0.906624	0.939478	0.997766	-0.00322716	insig
MW0140002	14,15-DiHETE	Lipids	Free fatty acids	C20H32O4	2	0.8595	-	317.63	3738.78	2272.59	8787.27	7663.01	1572.6	0.771053	0.217886	0.378508	0.351165	-1.50978	insig
MW0006876	Dioctyl phthalate	Benzene and substituted derivatives	Benzene and substituted derivatives	C24H38O4	2	0.8402	-	29227.2	48882.8	62303.1	52602.5	56604.9	45238.2	0.399661	0.682765	0.77678	0.909143	-0.137421	insig
MW0110042	Tris(2-butoxyethyl) phosphate	Others	Lactones	C18H39O7P	2	0.8358	-	878.53	11291.9	9980.4	13918	12456.5	13261.5	0.749318	0.215494	0.376624	0.558856	-0.839452	insig
MW0011470	9-nitro-9E-octadecenoic acid	Lipids	Free fatty acids	C18H33NO4	2	0.8269	-	46.02	46.02	46.02	5154.27	5721.71	6099.26	1.40646	0.00238576	0.0180476	0.00813302	-6.94199	down
MW0012778	1-Docosanoyl-sn-glycero-3-phosphocholine	GP	PC	C30H62NO7P	2	0.8151	-	381.63	2719.55	1999.06	1355.34	1924.87	95668.3	0.661636	0.423398	0.576096	0.0515444	-4.27804	insig
MW0110992	Dicyclohexylamine	Alcohol and amines	Amines	C12H23N	2	0.8048	-	552.28	1171.66	129.27	24854.4	18506.8	21371.6	1.33389	0.00642519	0.0333217	0.0286286	-5.1264	down
MW0115119	Phenol glucuronide	Benzene and substituted derivatives	Benzene and substituted derivatives	C12H14O7	2	0.803	-	623.85	473.78	1631.01	918.03	191.33	6526.21	0.18486	0.501198	0.640119	0.357359	-1.48455	insig
MW0111242	N-(2-Hydroxyethyl)hexadec-9-enamide	Alcohol and amines	Amines	C18H35NO2	2	0.7945	-	56225	68325.9	58931.6	82031	88423.7	96785.5	1.30491	0.00817624	0.0393396	0.686583	-0.542495	insig
MW0011908	Dioleoyl phosphatidylserine	GP	PS	C42H78NO10P	2	0.7882	-	6533.59	24467.9	21684.6	50092.3	38896.6	96732.9	1.12335	0.118734	0.251436	0.283683	-1.81765	down
MW0001379	1,5-Naphthalenediamine	Benzene and substituted derivatives	Benzene and substituted derivatives	C10H10N2	2	0.788	-	245731	259286	245248	308790	306715	335737	1.35088	0.00831203	0.0397086	0.788722	-0.342411	insig
MW0011898	1,2-Dioctanoyl-sn-glycerol	GL	DG	C19H36O5	2	0.7856	-	56321.5	57861.2	57034.1	51095.3	31228	41080	1.08611	0.107902	0.236061	1.38746	0.472444	insig
MW0116901	1-Benzylimidazole	Benzene and substituted derivatives	Benzene and substituted derivatives	C10H10N2	2	0.7829	-	76072.4	39320	75059.4	100186	92301.3	84236.6	0.957424	0.127541	0.26453	0.688238	-0.539021	insig
MW0106526	3-phenyl-2-(pyrrolidine-2-carbonylamino)propanoic Acid	Amino acids and derivatives	Amino acids and derivatives	C14H18N2O3	2	0.781	-	61602.1	60797.4	63099.2	134169	144774	140832	1.4041	0.00101699	0.0105957	0.441901	-1.17821	down
MW0008844	1-(Naphthalen-2-yl)-2-(pyrrolidin-1-yl)pentan-1-one	Benzene and substituted derivatives	Benzene and substituted derivatives	C19H23NO	2	0.7795	-	11285.8	11450.2	16547.9	17315.7	52174.3	18886.3	0.952531	0.285479	0.453527	0.444508	-1.16972	insig
MW0105002	(2R)-3-(5-acetamido-2-hydroxyphenyl)sulfanyl-2-azaniumylpropanoate	Amino acids and derivatives	Amino acids and derivatives	C11H14N2O4S	2	0.7748	-	20557.1	24733.5	27548	8823.3	9778.85	6049.54	1.34417	0.0054767	0.0301256	2.95471	1.56302	up
MW0015862	1-O-Hexadecyl-2-arachidonoyl-sn-glycero-3-phosphocholine	Benzene and substituted derivatives	Benzene and substituted derivatives	C44H82NO7P	2	0.7746	-	7086.69	1093.86	6075.08	4246.36	2925.27	125.4	0.574193	0.36273	0.527597	1.95362	0.966151	insig
MW0011860	1,2-Dimyristoleoyl-sn-glycero-3-phosphocholine	GP	PC	C36H68NO8P	2	0.7738	-	2537.69	6901.92	2247.06	16641.8	13885	30877.1	1.25989	0.0780874	0.184371	0.190325	-2.39347	down
MW0016968	Cedrol	Alcohol and amines	Alcohols	C15H26O	2	0.7724	-	3368.9	1577.1	7688.43	8433.38	6485.6	10478.4	0.953023	0.131519	0.270278	0.49747	-1.00732	insig
MW0139667	Schisandrin	Heterocyclic compounds	Heterocyclic compounds	C24H32O7	2	0.7723	-	15761.5	4674.62	309.49	2245.39	1889.97	6756.23	0.0438985	0.557074	0.680025	1.90474	0.929591	insig
MW0131753	Oroxylin A-7-o-beta-D-glucuronide	Organic acids	Organic acids	C22H20O11	2	0.7717	-	2693.86	30.81	3251.89	5078.23	3964.42	6472.24	0.786172	0.0667033	0.166222	0.385214	-1.37627	insig
MADN0522	4-Acetamidobenzoic acid	Benzene and substituted derivatives	Benzene and substituted derivatives	C9H9NO3	2	0.7688	-	3449.01	12686.4	15029.3	1538.63	15306.1	1405.53	0.677019	0.502503	0.640185	1.70762	0.771991	insig
MW0063221	1-beta-D-Galactosylsphingosine	Lipids	Sphingolipids	C24H47NO7	2	0.7615	-	263844	227798	258409	476436	446864	448049	1.38785	0.000173656	0.00394577	0.546944	-0.870535	insig
MW0115094	p-Cresol glucuronide	Benzene and substituted derivatives	Benzene and substituted derivatives	C13H16O7	2	0.7614	-	16506	25729.8	7298.98	16107.6	12511.9	15133.5	0.00973781	0.754202	0.830858	1.13215	0.179061	insig
MADP0516	4-(Butylamino)benzoic acid	Benzene and substituted derivatives	Benzene and substituted derivatives	C11H15NO2	2	0.7611	-	13965.6	15350	11888.7	12775.5	14942.4	11531.2	0.315814	0.669224	0.767995	1.04982	0.0701386	insig
MW0012973	1-Palmitoyl-2-oleoyl-sn-glycero-3-phosphate	GP	PA	C37H71O8P	2	0.7591	-	1025	4643.72	5876.43	12353.5	1627.11	5322.77	0.377999	0.512951	0.648169	0.59809	-0.741567	insig
MW0007428	Isopropyl 4-hydroxybenzoate	Benzene and substituted derivatives	Benzene and substituted derivatives	C10H12O3	2	0.7587	-	316061	304066	319344	302901	298879	312735	0.782574	0.252045	0.418898	1.02729	0.0388413	insig
MW0106482	Disuccinimidyl suberate	Others	Lactones	C16H20N2O8	2	0.7577	-	17286.4	22538.2	15305.2	1590.18	1187.92	3337.74	1.35228	0.0114393	0.0487559	9.01427	3.17221	up
MW0114300	Disialyllactose	Others	Saccharides	C34H56N2O27	2	0.7573	-	90611.2	77432.7	71024.2	48363.5	55000.7	58929.9	1.27031	0.0286399	0.0914301	1.47305	0.558811	insig
MW0014650	5,8,11,14-Eicosatetraynoic acid	Lipids	Free fatty acids	C20H24O2	2	0.7523	-	157.54	65.79	2630.43	32516.2	23434.1	14091.5	1.24283	0.0489319	0.131617	0.0407436	-4.61728	down
MADP0513	N-(2-Hydroxyethyl)nicotinamide	Alcohol and amines	Amines	C8H10N2O2	2	0.7515	-	297852	301607	315481	470507	430647	411171	1.36816	0.011356	0.0486064	0.697191	-0.520375	insig
MW0126993	xi-Tetrahydro-6-propyl-2H-pyran-2-one	Others	Ketone compounds	C8H14O2	2	0.7514	-	55447.1	17313.7	14011.4	19391.2	18369.4	16792.6	0.420986	0.504165	0.641333	1.5906	0.669568	insig
MW0106558	(2R)-piperidin-1-ium-2-carboxylate	Organic acids	Organic acids	C6H11NO2	2	0.7474	-	570.83	201.37	252.78	205.5	265.11	393.28	0.192326	0.704517	0.793689	1.18647	0.246676	insig
MW0009362	Pentylone	Benzene and substituted derivatives	Benzene and substituted derivatives	C13H17NO3	2	0.7471	-	28035.6	34133.3	24194	6766.74	7147.14	6836.31	1.39271	0.0169318	0.0638625	4.16203	2.05729	up
MW0104412	(2R,6S)-2,6-Diaminoheptanedioic acid	Organic acids	Organic acids	C7H14N2O4	2	0.7463	-	4997.41	503.68	261.9	9585.05	7446.16	8518.77	1.10527	0.0362201	0.10754	0.225558	-2.14843	down
MW0120565	4-Hydroxy Triamterene	Benzene and substituted derivatives	Benzene and substituted derivatives	C12H11N7O	2	0.7451	-	1463.43	1557.74	943.8	2650.67	4288.09	853.67	0.628009	0.326303	0.493577	0.508823	-0.974763	insig
MW0011795	1-(1Z-octadecenyl)-sn-glycero-3-phosphocholine	GP	PC	C26H54NO6P	2	0.7364	-	13314.6	79137.7	91518.6	32749.8	52673	32328.8	0.199488	0.46243	0.606347	1.56236	0.643731	insig
MW0106515	Leucylvaline	Amino acids and derivatives	Amino acids and derivatives	C11H22N2O3	2	0.736	-	1010.48	6604.65	7762.18	3853.68	601.75	3189.13	0.485908	0.349098	0.51446	2.01154	1.0083	insig
MW0169279	Huperzine-A	Heterocyclic compounds	Heterocyclic compounds	C15H18N2O	2	0.7356	-	2.71713e+06	2.49843e+06	2.84453e+06	3.12911e+06	3.22237e+06	3.09176e+06	1.25821	0.0319597	0.0979936	0.85353	-0.228487	insig
MW0116804	10-Acetyl-3,7-dihydroxyphenoxazine	Heterocyclic compounds	Heterocyclic compounds	C14H11NO4	2	0.7333	-	17143.6	18398.1	3653.76	11557.2	3293.16	11122.2	0.3395	0.473422	0.616283	1.50911	0.593697	insig
MADP0515	6-Aminonicotinamide	Nucleotides and derivatives	Nucleotides and derivatives	C6H7N3O	2	0.7314	-	541.17	246.4	327.44	3461.87	3240.96	4082.13	1.37767	0.00288069	0.0200258	0.103386	-3.27389	down
MW0013074	2,2-Dimethylbutyric acid	Organic acids	Organic acids	C6H12O2	2	0.7308	-	23757.1	24802.6	54126.7	49307.8	87462.4	20551.3	0.454607	0.464783	0.608839	0.652716	-0.615472	insig
MW0168189	Patchouli alcohol	Alcohol and amines	Alcohols	C15H26O	2	0.7305	-	2856.26	2796.13	2859.2	2380.32	2438.16	2451.13	1.39206	0.000161739	0.00377935	1.17085	0.227551	insig
MW0135000	Flavone base + 3O, O-HexA, C-Hex, C-Hex	Organic acids	Organic acids	C33H38O21	2	0.7253	-	58190	94915.2	91280.3	28000.2	30557.1	2101.66	1.0195	0.0162515	0.0623462	4.02885	2.01037	up
MW0138309	CID 75130910	Others	Lactones	C28H34O10	2	0.7225	-	53578.7	48151.1	43951.7	48729.5	45217.2	52043	0.0380854	0.977578	0.985399	0.997889	-0.0030492	insig
MW0012843	1-Tetracosanoyl-sn-glycero-3-phosphocholine	Lipids	LPC	C32H66NO7P	2	0.7213	-	363.46	2784.21	393.37	12605.9	11604.2	592.59	0.840242	0.203019	0.361188	0.142769	-2.80825	insig
MW0008784	N(4)-Acetylsulfamethazine	Benzene and substituted derivatives	Benzene and substituted derivatives	C14H16N4O3S	2	0.7192	-	161274	138833	149735	276262	279599	264224	1.3904	0.000189672	0.00415629	0.548531	-0.866356	insig
MW0168256	3,7-Dimethyl-9-(2,6,6-trimethylcyclohex-1-en-1-yl)nona-2,4,6,8-tetraenoic acid	Others	Vitamin	C20H28O2	2	0.7183	-	8078.26	53714.3	63663.6	998.59	12000.8	9414.01	0.936061	0.17861	0.33356	5.59738	2.48475	insig
MW0006730	Desacetyl-nitazoxanide	Benzene and substituted derivatives	Benzene and substituted derivatives	C10H7N3O4S	2	0.7152	-	3620.36	701.88	137.36	1726.96	1521.94	1543.87	0.559118	0.927503	0.954563	0.930485	-0.103945	insig
MW0011914	1,2-Dipalmitoleoyl-sn-glycero-3-phosphoethanolamine	GP	PE	C37H70NO8P	2	0.7118	-	28717.5	28618	16864.3	7653.48	13047	13260.5	1.18245	0.0580285	0.149586	2.18485	1.12754	up
MW0122491	7-Hydroxymethotrexate	Heterocyclic compounds	Heterocyclic compounds	C20H22N8O6	2	0.7102	-	88563.5	98363.4	135753	160345	147012	163968	1.16718	0.0614009	0.155703	0.684621	-0.546622	insig
MW0139960	Wuweizisu C	Lignans and Coumarins	Lignans	C22H24O6	2	0.7019	-	78246.4	85064.6	83490.6	102313	101046	105894	1.36259	0.00184226	0.0151592	0.798056	-0.325438	insig
MW0146362	Aspartylmethionine	Amino acids and derivatives	Amino acids and derivatives	C9H16N2O5S	3	0.9995	-	1.46435e+06	1.50583e+06	1.53502e+06	3.29448e+06	3.24752e+06	3.21027e+06	1.40566	9.16881e-07	0.000373296	0.461965	-1.11414	down
MW0055636	1-(9Z-hexadecenoyl)-2-(9Z-tetradecenoyl)-glycero-3-phosphate	GP	PA	C33H61O8P	3	0.9838	-	15.17	35.66	9.97	16.88	12.81	2137.17	0.560727	0.425613	0.576831	0.028059	-5.15539	insig
MW0004036	Isovanillic acid	Benzene and substituted derivatives	Benzene and substituted derivatives	C8H8O4	3	0.9733	-	37860.6	36565.7	39512.5	42355.7	43367	39624.3	1.13242	0.0578756	0.149395	0.908986	-0.137669	insig
MEDP0638	1-(9Z-hexadecenoyl)-glycero-3-phosphoethanolamine	GP	LPE	C21H42NO7P	3	0.9638	-	1.3756e+06	1.39897e+06	1.3689e+06	2.21917e+06	2.13415e+06	2.22978e+06	1.40374	0.000603619	0.00805891	0.62941	-0.667928	insig
MW0129493	1-(2,4-dihydroxyphenyl)-3-{3-[(3,3-dimethyloxiran-2-yl)methyl]-4-hydroxyphenyl}propan-1-one	Others	Ketone compounds	C20H22O5	3	0.9567	-	84374.3	72111.3	99989.6	111115	107706	127510	1.15088	0.0454228	0.125356	0.740549	-0.433332	insig
MEDP1686	1-Pentadecanoyl-glycero-3-phosphoethanolamine	Lipids	LPC	C20H42NO7P	3	0.9499	-	88169.3	103951	73231.3	209957	175016	171642	1.33986	0.00413515	0.0253812	0.476723	-1.06878	down
MEDN1530	Cellobiose	Others	Saccharides	C12H22O11	3	0.9485	-	1.92863e+06	1.75807e+06	1.55227e+06	2.92758e+06	3.30774e+06	2.85129e+06	1.35418	0.00250387	0.0185639	0.57656	-0.794457	insig
MW0059301	PE-NMe(15:0/18:3(6Z,9Z,12Z))	GP	PE	C39H72NO8P	3	0.9484	-	7060.1	9657.65	23543.2	6845.88	4804.22	762.64	0.940492	0.204041	0.362101	3.24352	1.69756	insig
MW0112501	3,4,5-trihydroxy-6-[3-(4-hydroxy-3-methoxyphenyl)oxirane-2-carbonyloxy]oxane-2-carboxylic acid	Organic acids	Organic acids	C16H18O11	3	0.9462	-	59.14	183.96	156.35	81.68	9736.09	146.05	0.581382	0.424979	0.576831	0.04009	-4.64061	insig
MEDL02283	3-Methoxyanthranilate	Phenolic acids	Phenolic acids	C8H9NO3	3	0.9415	-	12563.1	12743.1	11092.2	14615.6	9866.35	12118.1	0.0292309	0.966792	0.978686	0.99449	-0.00797176	insig
MW0056323	PA(22:5(4Z,7Z,10Z,13Z,16Z)/22:6(4Z,7Z,10Z,13Z,16Z,19Z))	GP	PA	C47H71O8P	3	0.9314	-	29480.3	3759.79	50912.6	31557.3	58069.8	128643	0.80449	0.261667	0.429684	0.385544	-1.37503	insig
MW0114089	cis-Ferulic acid [arabinosyl-(1->3)-[glucosyl-(1->6)]-glucosyl] ester	Organic acids	Organic acids	C27H38O18	3	0.9227	-	202.24	37.39	41.64	905.55	389.84	113.44	0.992471	0.243456	0.408156	0.199648	-2.32447	insig
MW0114982	N-di-Demethyl roxithromycin	Others	Lactones	C40H74N2O14	3	0.9153	-	3648.25	789.98	5856.34	1056.9	1706.61	2525.55	0.445309	0.374362	0.537545	1.94639	0.9608	insig
MW0132690	3,5,7-Trihydroxy-2-(4-hydroxyphenyl)-6,8-dimethoxychromen-4-one	Others	Ketone compounds	C17H14O8	3	0.9128	-	78.67	3190.72	76.49	61.5	71.19	78.83	0.668594	0.420035	0.574485	15.8183	3.98352	insig
MEDP1857	N-(2-hydroxyethyl)icosanamide	Organic acids	Organic acids	C22H45NO2	3	0.8971	-	14512.9	17556.8	15223.4	18709.6	18167.5	20359.4	1.15726	0.0483083	0.130462	0.826276	-0.275304	insig
MEDP2189	Hexadecylamine	Alcohol and amines	Amines	C16H35N	3	0.894	-	264643	268463	289196	206632	202888	209426	1.37831	0.00914701	0.0419572	1.32855	0.409856	insig
MEDP1124	15-Hydroxy-5,8,11,13-eicosatetraenoic acid	Lipids	Free fatty acids	C20H32O3	3	0.8883	-	13478	24819.4	2995.12	11189.6	21467	20286.8	0.519994	0.622032	0.732915	0.779938	-0.358569	insig
MEDP1990	Polydextrose	Others	Saccharides	C12H22O11	3	0.8859	-	85.34	328.98	729.34	104.01	36.08	349.21	0.634949	0.377055	0.540065	2.33734	1.22487	insig
MW0015804	annoglacin A	FA	Others	C37H68O7	3	0.8777	-	524207	1.29134e+06	948375	2.44078e+06	697215	695870	0.285573	0.612812	0.725018	0.720924	-0.472081	insig
MW0128921	{[(6E)-3-oxo-1,7-diphenylhept-6-en-2-yl]oxy}sulfonic acid	Organic acids	Organic acids	C19H20O5S	3	0.8743	-	37952.8	32814.8	38427.2	51606.7	48135.4	45487.4	1.29	0.0089113	0.0412993	0.751878	-0.41143	insig
MW0010733	VERBENONE	Terpenoids	Monoterpenoids	C10H14O	3	0.8667	-	237.19	683.79	523.32	1269.2	392.86	1042.7	0.747231	0.249436	0.415762	0.533985	-0.90513	insig
MW0057099	PC(18:3(6Z,9Z,12Z)/20:5(5Z,8Z,11Z,14Z,17Z))	GP	PC	C46H76NO8P	3	0.847	-	191.57	91.98	703871	219085	457306	69478.2	0.848195	0.960893	0.976235	0.944072	-0.0830307	insig
MW0129290	{4-[2,3-Dioxo-3-(2,4,6-trihydroxy-3-methoxyphenyl)propyl]-2-hydroxy-6-methoxyphenyl}oxidanesulfonic acid	Organic acids	Organic acids	C17H16O12S	3	0.8469	-	29414	44359.1	25816.5	85186.2	150658	75412.8	1.26808	0.0888601	0.204034	0.319959	-1.64404	down
MEDP1212	1,3-Dicyclohexylurea	Alcohol and amines	Polyamines	C13H24N2O	3	0.8466	-	144598	114719	142233	147840	155878	143021	0.813398	0.252965	0.41939	0.898848	-0.153852	insig
MW0127783	1-Hydroxy-1,7-bis(4-hydroxy-3-methoxyphenyl)-(6e)-6-heptene-3,5-dione	Others	Ketone compounds	C21H22O7	3	0.8376	-	288969	263266	146749	330840	308060	316113	0.89829	0.187967	0.344806	0.731911	-0.45026	insig
MW0139106	Naringin 6''-rhamnoside	Flavonoids	Flavones	C33H42O18	3	0.8282	-	54670.6	136999	116922	173346	176257	180254	1.03173	0.0958492	0.214702	0.582405	-0.779905	insig
MW0134081	CID 74977688	Others	Ketone compounds	C27H30O15	3	0.8257	-	13978.4	19406	64228.6	38655.6	37051.7	74222.8	0.709782	0.436044	0.586043	0.651057	-0.619145	insig
MW0061278	PG(a-13:0/18:2(9Z,11Z))	GP	PG	C37H69O10P	3	0.8228	-	560723	537780	606708	972609	908167	834723	1.3671	0.00501431	0.0285299	0.627955	-0.671267	insig
MW0013479	2-Hexaprenyl-3-methyl-6-methoxy-1,4 benzoquinone	Benzene and substituted derivatives	Benzene and substituted derivatives	C38H56O3	3	0.8225	-	346.9	330.42	2294.29	1089.54	219.81	472.67	0.246176	0.616601	0.728217	1.66755	0.737731	insig
MW0166040	1-Palmitoyl-2-vernoloyl-phosphatidylcholine	GL	DG	C42H80NO9P	3	0.8195	-	766711	628383	381601	138308	203722	194117	1.3015	0.0625548	0.157934	3.31382	1.7285	up
MW0012773	1-arachidonoyl-sn-glycero-3-phospho-1D-myo-inositol	GP	PI	C29H49O12P	3	0.8124	-	62011.3	74744.5	76094.2	65414.6	73669.8	57718.9	0.535821	0.452255	0.598259	1.08154	0.113083	insig
MW0061296	PG(i-12:0/18:2(9Z,11Z))	GP	PG	C36H67O10P	3	0.8053	-	1.31433e+06	1.2508e+06	1.3255e+06	1.3151e+06	1.22756e+06	1.13835e+06	0.744085	0.306907	0.475157	1.05695	0.0799039	insig
MW0055977	PA(20:2(11Z,14Z)/22:6(4Z,7Z,10Z,13Z,16Z,19Z))	GP	PA	C45H73O8P	3	0.8039	-	1871.66	6565.7	7827.77	16249.5	3135.41	17675.9	0.646284	0.270313	0.439477	0.438878	-1.18811	insig
MW0013475	2-Hexaprenyl-3-methyl-5-hydroxy-6-methoxy-1,4-benzoquinone	Alcohol and amines	Alcohols	C38H56O4	3	0.7939	-	94800.1	85612.8	93069.1	65073.2	65873.3	69830.9	1.36568	0.00461063	0.0269156	1.36212	0.445849	insig
MW0014958	6-[2,4-dihydroxy-1-(1-oxo-1H-isochromen-3-yl)butoxy]-3,4,5-trihydroxyoxane-2-carboxylic acid	Organic acids	Organic acids	C19H22O11	3	0.7919	-	115823	103654	95212.6	110517	107069	113491	0.581926	0.462091	0.606099	0.950503	-0.0732369	insig
MW0012983	1-Phosphatidyl-1D-myo-inositol 3,4-bisphosphate	GP	PA	C11H21O19P3	3	0.7895	-	481391	517488	558429	1.40878e+06	1.43232e+06	1.46537e+06	1.4014	1.08362e-05	0.000970922	0.361621	-1.46745	down
MW0021617	CL(8:0/10:0/10:0/11:0)	GL	CL	C48H92O17P2	3	0.7892	-	531	1115.53	1709.16	1160.37	732.71	2780.49	0.368728	0.578874	0.696099	0.718014	-0.477916	insig
MW0055682	PA(18:0/22:6(4Z,7Z,10Z,13Z,16Z,19Z))	GP	PA	C43H73O8P	3	0.7871	-	478350	464724	489088	699209	671250	626121	1.37597	0.00747558	0.0369835	0.717307	-0.479337	insig
MW0128601	[2-Hydroxy-1-(1-oxoisochromen-3-yl)butyl] hydrogen sulate	Organic acids	Organic acids	C13H14O7S	3	0.7854	-	124.31	41.74	4623.87	5080.96	5918.35	112.25	0.554331	0.424071	0.576485	0.431075	-1.21399	insig
MW0115350	Tetraethylene glycol	Alcohol and amines	Alcohols	C8H18O5	3	0.785	-	6645.19	2868.63	6109.67	4454.6	6186.03	6867.72	0.369007	0.677444	0.773126	0.892345	-0.164326	insig
MEDP2121	Pentadecylamine	Alcohol and amines	Amines	C15H33N	3	0.7736	-	4.48683e+06	4.77485e+06	4709248	4.12739e+06	4.1027e+06	4.15172e+06	1.3407	0.0235923	0.0794024	1.12834	0.174206	insig
MW0053727	Glycerol trisinapate	GL	TG	C36H38O15	3	0.7667	-	36794.5	26803.2	27689.8	24255.8	39350.2	48796.6	0.506421	0.439827	0.588883	0.812148	-0.300186	insig
MEDP0798	1-Naphthylamine	Alkaloids	Alkaloids	C10H9N	3	0.7659	-	36.33	1651.1	84.78	4683.96	58.81	565.2	0.445083	0.513786	0.648587	0.333877	-1.58261	insig
MW0134272	1-(3,4,5-Trihydroxyphenyl)-3-(2,4,6-trihydroxyphenyl)-2-propanol	Benzene and substituted derivatives	Benzene and substituted derivatives	C15H16O7	3	0.753	-	179.65	116.98	1593.53	210.79	153.82	132.55	0.541624	0.437124	0.586713	3.80191	1.92673	insig
MW0130720	Benzyltartronic acid	Organic acids	Organic acids	C10H10O5	3	0.7481	-	9620.69	8659.44	9319.75	26389.4	23706.6	23867.7	1.40072	0.00142217	0.0129018	0.373154	-1.42216	down
MW0128125	(3-{8-[1-(2,4-dihydroxyphenyl)-3-(3,4-dihydroxyphenyl)-2-hydroxypropyl]-3,5,7-trihydroxy-3,4-dihydro-2H-1-benzopyran-2-yl}phenyl)oxidanesulfonic acid	Organic acids	Organic acids	C30H28O13S	3	0.7475	-	851.55	820.37	1098.84	1080.5	953.95	1715.88	0.800453	0.299448	0.466689	0.738804	-0.436736	insig
FDATN00516	Benznidazole	Benzene and substituted derivatives	Benzene and substituted derivatives	C12H12N4O3	3	0.7463	-	15310	15310.1	12556.7	9797.94	8575.16	16129.3	0.755307	0.344869	0.511401	1.25142	0.323561	insig
MEDP1063	Indole-5-carboxylic acid	Alkaloids	Plumerane	C9H7NO2	3	0.7457	-	42659.8	55731.9	46086.5	49549.3	45966.6	51582.1	0.187336	0.851576	0.899778	0.982191	-0.0259248	insig
MEDP0535	TRIETHYL PHOSPHATE	Organic acids	Organic acids	C6H15O4P	3	0.744	-	6392.11	1708.12	1934.79	5199.57	5071.83	4385.32	0.782391	0.419235	0.574365	0.68467	-0.546519	insig
MW0167804	[2-hexadecanoyloxy-3-[hydroxy-[2-(methylamino)ethoxy]phosphoryl]oxypropyl] (Z)-octadec-9-enoate	GL	DG	C40H78NO8P	3	0.7438	-	203964	224230	100157	4063.34	2365.86	4066.2	1.38893	0.0461268	0.126519	50.3412	5.65367	up
MW0130194	2-(3,4-dimethoxyphenyl)-5,6,7,8-tetrahydroxy-3-methoxy-3,4-dihydro-2H-1-benzopyran-4-one	Benzene and substituted derivatives	Benzene and substituted derivatives	C18H18O9	3	0.7428	-	5088.6	6608.46	4793.88	2498.33	2010.52	2136.63	1.36094	0.0223248	0.0764771	2.48153	1.31123	up
MW0061198	PG(18:3(6Z,9Z,12Z)/22:6(4Z,7Z,10Z,13Z,16Z,19Z))	GP	PG	C46H73O10P	3	0.7418	-	2600.81	8274.66	75963.8	70014.3	51326.8	33550.8	0.812606	0.449069	0.594824	0.560644	-0.834842	insig
MW0054938	Methyl(Z)-5-(1-propynyl)-2-thienylacrylate	Others	Lactones	C11H10O2S	3	0.7407	-	59617.4	1525.36	1886.42	28680	42245.8	46668.5	0.883895	0.448697	0.594722	0.535988	-0.899727	insig
MW0012942	1-Oleoyl-2-palmitoyl-sn-glycero-3-phosphocholine	GP	PC	C42H82NO8P	3	0.7393	-	2384.18	30448.9	23082.2	25.32	20.25	971.97	1.20928	0.161078	0.310157	54.9515	5.78009	up
MW0128543	[2-(3,4-dihydroxyphenyl)-5,6,7-trihydroxy-4-oxo-3,4-dihydro-2H-1-benzopyran-3-yl]oxidanesulfonic acid	Organic acids	Organic acids	C15H12O11S	3	0.7371	-	12307.1	2471.6	6774.86	134295	130240	130144	1.34691	5.0725e-05	0.00204523	0.0546103	-4.19468	down
MW0057177	PC(18:4(6Z,9Z,12Z,15Z)/P-18:1(11Z))	GP	PC	C44H78NO7P	3	0.7369	-	163.25	143.04	196.82	5391.99	10239.7	3346.35	1.38186	0.0947559	0.213082	0.0265101	-5.23731	down
MW0106102	1-(D-3-Mercapto-2-methyl-1-oxopropyl)-L-proline	Organic acids	Organic acids	C9H15NO3S	3	0.7338	-	168.76	187.81	398.39	53.74	494.15	22.57	0.659564	0.741105	0.819116	1.32342	0.404274	insig
MW0135496	6-[3,7-dihydroxy-2-(3-hydroxyphenyl)-3,4-dihydro-2H-1-benzopyran-4-yl]-8-[2-(3,4-dihydroxyphenyl)-3,7-dihydroxy-3,4-dihydro-2H-1-benzopyran-4-yl]-2-(4-hydroxy-3-methoxyphenyl)-3,4-dihydro-2H-1-benzopyran-3,5,7-triol	Benzene and substituted derivatives	Benzene and substituted derivatives	C46H40O15	3	0.7328	-	5884.54	89517.8	156320	122658	21952.2	167197	0.324394	0.759699	0.835772	0.807301	-0.308822	insig
MW0061286	CID 131823277	GP	PG	C33H65O10P	3	0.7325	-	2381.38	2120.18	11009	16808.1	3883.06	1644.14	0.178946	0.707092	0.794987	0.694441	-0.526076	insig
MW0132850	CID 75111068	Others	Ketone compounds	C33H40O21	3	0.7316	-	2694.17	885.97	1270.62	21.89	1532.39	32.01	0.968792	0.218229	0.378778	3.05793	1.61255	insig
MW0161889	docosanedioate	Lipids	Free fatty acids	C22H40O4-2	3	0.7292	-	3760.39	7969.45	9941.03	10076.7	9256.18	9574.41	0.740576	0.316147	0.483943	0.749667	-0.415678	insig
MW0012979	1-Palmitoylglycerophosphocholine	GP	PC	C24H51NO7P+	3	0.7254	-	690976	819879	742478	2.88391e+06	3.41113e+06	3.50448e+06	1.39859	0.00457183	0.0268759	0.229943	-2.12065	down
MW0124428	Indolo[2,1-b]quinazoline-6,12-dione	Alkaloids	Plumerane	C15H8N2O2	3	0.7243	-	24922.8	23959.2	21169.3	20691.8	22608.8	21003.7	0.841316	0.228315	0.390235	1.08937	0.123498	insig
MW0003283	2-Naphthoic acid	Benzene and substituted derivatives	Benzene and substituted derivatives	C11H8O2	3	0.7233	-	123.88	581.06	1192.31	943.78	3488.49	2360.04	0.979613	0.144231	0.287899	0.279323	-1.83999	insig
MEDP0811	2-(Methylthio)benzothiazole	Alkaloids	Alkaloids	C8H7NS2	3	0.7205	-	231067	238439	194737	584409	615653	509830	1.38504	0.00304615	0.0207467	0.38847	-1.36412	down
MW0003657	Mdpbp	Benzene and substituted derivatives	Benzene and substituted derivatives	C15H19NO3	3	0.7193	-	13106	13554.7	13198.9	12778.9	10382.1	11422.7	1.07762	0.121781	0.256139	1.15255	0.204835	insig
MEDL02614	Gancaonin D	Flavonoids	Isoflavones	C21H20O7	3	0.7185	-	1065.83	857.31	172.27	748.36	1572.18	44.06	0.208305	0.872418	0.913422	0.886158	-0.174364	insig
MW0112467	3,4,5-trihydroxy-6-[2-hydroxy-4-(2-hydroxy-3-methoxy-3-oxopropyl)phenoxy]oxane-2-carboxylic acid	Organic acids	Organic acids	C16H20O11	3	0.7161	-	27707.2	23784.8	23672	19013.6	19181.5	22630.7	1.1404	0.0552814	0.144549	1.23573	0.305361	insig
MW0108657	N-Acetyl-S-(N-allylthiocarbamoyl)-L-cysteine	Amino acids and derivatives	Amino acids and derivatives	C9H14N2O3S2	3	0.7148	-	1.42967e+06	1.28653e+06	1.32606e+06	3.00322e+06	3.02523e+06	2.48221e+06	1.38125	0.0105459	0.0461183	0.474965	-1.07411	down
MW0156201	Pteridine	Heterocyclic compounds	Pteridines and derivatives	C6H4N4	3	0.7141	-	846.21	956.61	825.91	1386.78	670.9	1576.39	0.61472	0.347862	0.513551	0.723357	-0.46722	insig
MW0055142	Muricatenol	FA	Others	C37H68O6	3	0.7126	-	9193.21	51110.1	52693.5	54949.7	50031.1	22386.7	0.322807	0.799012	0.861114	0.887172	-0.172715	insig
MW0127867	(2-{9-hydroxy-2-oxo-2H,8H,9H-furo[2,3-h]chromen-8-yl}-2-[(3-methylbut-2-enoyl)oxy]propoxy)sulfonic acid	Organic acids	Organic acids	C19H20O10S	3	0.7108	-	11321.2	10850	13476.1	69913.9	73073	68026.1	1.40251	3.95139e-05	0.00181045	0.168934	-2.56547	down
MW0117329	2-(1,3-dihydroxy-4-oxocyclohex-2-en-1-yl)-5-hydroxy-3,6,7-trimethoxy-4H-chromen-4-one	Others	Ketone compounds	C18H18O9	3	0.7105	-	303.85	128660	304.35	200555	167470	7428.77	0.827183	0.332039	0.499732	0.3443	-1.53826	insig
MEDL00403	2-Hexadecenal	FA	Others	C16H30O	3	0.7101	-	4898.49	5601.17	6395.26	8678.62	9868.14	15630.2	1.21916	0.110036	0.239044	0.494337	-1.01643	down
MW0146750	Biotinyl-5'-AMP	Nucleotides and derivatives	Nucleotides and derivatives	C20H28N7O9PS	3	0.709	-	8201.54	8383.32	4806.08	27991.6	16556.7	16846.2	1.27129	0.0604942	0.154094	0.348418	-1.52111	down
MW0111912	2-(Hydroxymethyl)-6-(2,4,6-trihydroxyphenyl)oxane-3,4,5-triol	Alcohol and amines	Alcohols	C12H16O8	3	0.7068	-	15.2	235.62	493.68	123.93	55.8	83.34	0.239381	0.365451	0.529569	2.83005	1.50083	insig
MEDL01986	Pleoside	Phenolic acids	Phenolic acids	C15H20O9	3	0.7063	-	7716.56	5521.21	7177.58	2009.34	3602.94	3742.34	1.22913	0.0137672	0.0555647	2.18238	1.1259	up
MW0010810	(1(10)E,4E,6a,9b)-9-(2-Methylbutanoyloxy)-1(10),4,11(13)-germacratrien-12,6-olide	Others	Ketone compounds	C20H28O4	3	0.7047	-	35.04	40.75	172.87	235.79	1014.19	886.29	1.1988	0.116133	0.248275	0.116399	-3.10285	down
MEDP0825	N-Cyclohexylformamide	Alkaloids	Alkaloids	C7H13NO	3	0.7034	-	181.14	1124.98	252.6	124.47	424.84	621.94	0.142505	0.727525	0.809878	1.33082	0.412313	insig
MW0127315	3-Vinyl-4H-1,2-dithiin	Heterocyclic compounds	Heterocyclic compounds	C6H8S2	3	0.7032	-	275702	291417	310458	420613	359760	378131	1.29972	0.0182164	0.0669539	0.757509	-0.400665	insig
MW0132556	3,4,8,9,10-pentahydroxy-6-oxo-2-{5,6,7-trihydroxy-1-oxo-3-[1,3,4-trihydroxy-2-(sulfooxy)butyl]-1H-isochromen-8-yl}-6H-benzo[c]chromene-1-carboxylic acid	Organic acids	Organic acids	C27H20O21S	3	0.7027	-	26097.2	77952.1	49635.6	35086.4	3258.45	2232.65	1.03324	0.117793	0.250169	3.78744	1.92122	up
MW0133911	5,6,7,8-Tetrahydroxy-2-(3,4,5-trihydroxyphenyl)chromen-4-one	Others	Ketone compounds	C15H10O9	3	0.7017	-	1.82815e+06	1.66467e+06	1.8233e+06	2.16764e+06	1.94024e+06	2.43019e+06	1.14903	0.0881286	0.202816	0.813102	-0.298492	insig
MW0006383	Bisacodyl	Benzene and substituted derivatives	Benzene and substituted derivatives	C22H19NO4	3	0.7007	-	3486.22	7351.73	8343.62	11533.9	11022.2	15102.6	1.10257	0.0357613	0.106649	0.509352	-0.973264	insig
MW0110104	Trp-Cys	Amino acids and derivatives	Amino acids and derivatives	C14H17N3O3S	3	0.6989	-	168857	180521	183061	176920	159733	173143	0.676995	0.331356	0.499331	1.04442	0.0626952	insig
MW0112182	2-Keto-3-Deoxy-D-Mannooctanoic Acid	Organic acids	Organic acids	C8H14O8	3	0.6986	-	1030.2	806.05	938.66	1629.23	144.67	1302.41	0.274966	0.845022	0.895325	0.902025	-0.14876	insig
MW0012203	Auda	FA	Others	C23H40N2O3	3	0.6972	-	744089	710987	734207	1.22591e+06	765385	741384	0.721423	0.369424	0.533112	0.801148	-0.319858	insig
MW0128713	[3,5-dihydroxy-2-(hydroxymethyl)-6-{2,4,6-trihydroxy-3-[3-(3-hydroxyphenyl)propanoyl]phenyl}oxan-4-yl]oxidanesulfonic acid	Organic acids	Organic acids	C21H24O13S	3	0.6963	-	24755.6	28931.9	25042.3	15515.9	16950.6	12258.5	1.31453	0.00424368	0.0258701	1.76031	0.815827	insig
MW0104237	1-Aminocyclohexanecarboxylic acid	Benzene and substituted derivatives	Benzene and substituted derivatives	C7H13NO2	3	0.6958	-	27879.2	27477.7	29188.1	42657.2	42623.8	44707.1	1.39796	0.000104172	0.00291681	0.650406	-0.620589	insig
MW0017014	CerP(d18:1/12:0)	SL	Cer	C30H60NO6P	3	0.6949	-	844.94	303.32	1295.91	703.11	681.79	167.05	0.487378	0.435939	0.586043	1.5749	0.655263	insig
MEDL01878	Methyl dioxindole-3-acetate	Alkaloids	Plumerane	C11H11NO4	3	0.6946	-	2172.91	1499.99	1062.82	554.55	640.58	2373.43	0.593968	0.603519	0.71739	1.32707	0.408242	insig
MEDL01752	Asparagoside C	Steroids	Steroidal saponins	C39H64O13	3	0.6918	-	36510.3	59036.3	41551.1	65904.3	62472.9	58657.9	1.04977	0.124946	0.260353	0.733005	-0.448106	insig
MW0000473	tropinone	Alkaloids	Tropan alkaloids	C8H13NO	3	0.6903	-	626.14	386.84	5996.56	3202.65	2092.86	3600.13	0.672256	0.767512	0.840241	0.787975	-0.343779	insig
MW0056825	PC(14:1(9Z)/18:4(6Z,9Z,12Z,15Z))	GP	PC	C40H70NO8P	3	0.6883	-	1921.56	2272.44	5748.18	2297.29	1752.52	1815.07	0.710827	0.381598	0.544068	1.69521	0.761461	insig
MW0128759	[4-(5,7-dihydroxy-4-oxo-3,4-dihydro-2H-1-benzopyran-2-yl)-5-hydroxy-9,13,13-trimethyl-8-oxatetracyclo[7.4.1.0(2),.0(1)(2),(1)]tetradeca-2(7),3,5-trien-10-yl]oxidanesulfonic acid	Organic acids	Organic acids	C25H26O10S	3	0.6871	-	720984	831795	1.14836e+06	1.38304e+06	1.18477e+06	2.05699e+06	1.09275	0.120092	0.253249	0.584056	-0.775822	insig
MW0009592	P-Toluenesulfonamide	Benzene and substituted derivatives	Benzene and substituted derivatives	C7H9NO2S	3	0.6865	-	3589.61	1035.66	2823.12	6666.62	4360.2	5893.98	1.06639	0.0365169	0.108172	0.440191	-1.1838	down
MW0137932	Deoxyschizandrin	Lignans and Coumarins	Lignans	C24H32O6	3	0.6856	-	7062.72	4826.58	6351.47	18685	13224.4	21008.1	1.33267	0.0298249	0.093583	0.344702	-1.53658	down
MW0062294	1-Tetradecanoyl-2-pentadecanoyl-glycero-3-phosphoserine	GP	PS	C35H68NO10P	3	0.6802	-	18632.5	25507.1	25219.4	8902.62	32706.7	124876	0.326993	0.456689	0.601754	0.416607	-1.26324	insig
MW0112523	3,4,5-Trihydroxy-6-[4-(3-oxo-3-{2,3,4-trihydroxy-5-[hydroxy(3,4,5-trihydroxyoxan-2-yl)methyl]-6-oxo-3-[3,4,5-trihydroxy-6-(hydroxymethyl)oxan-2-yl]cyclohexa-1,4-dien-1-yl}propyl)phenoxy]oxane-2-carboxylic acid	Benzene and substituted derivatives	Benzene and substituted derivatives	C33H42O22	3	0.6791	-	155707	165299	163551	5802.77	4660.53	5262.27	1.40569	0.000305554	0.00548685	30.8133	4.94548	up
MW0112514	3,4,5-trihydroxy-6-[4-(1-hydroxy-3-oxobutyl)-2-methoxyphenoxy]oxane-2-carboxylic acid	Organic acids	Organic acids	C17H22O10	3	0.6785	-	42589.6	39036.7	41058.4	49763.4	55023.3	40497.9	0.919697	0.213511	0.373857	0.844445	-0.243925	insig
MEDP1515	Carnitine C9:0(2,6-Dimethylheptanoyl carnitine)	FA	CAR	C16H31NO4	3	0.6776	-	20995.2	20918.4	28414.2	61281.1	68591.1	12901	0.574185	0.30022	0.46737	0.492585	-1.02156	insig
MW0112458	3,4,5-trihydroxy-6-[2-hydroxy-3-(3-hydroxyprop-1-en-1-yl)phenoxy]oxane-2-carboxylic acid	Benzene and substituted derivatives	Benzene and substituted derivatives	C15H18O9	3	0.6767	-	965.55	617.81	1465.07	3286.56	2384.79	521.28	0.539769	0.326358	0.493577	0.492267	-1.02249	insig
MEDTP01862	MG(18:4/0:0/0:0)	GL	MG	C21H34O4	3	0.6764	-	25554.1	23660.2	30503.3	97618	89005.5	70826.3	1.37761	0.012974	0.0531077	0.309643	-1.69132	down
MW0136873	Dipteryxin	Others	Ketone compounds	C17H14O6	3	0.6764	-	392.21	1006.38	926.56	3213.12	6013.23	2987.05	1.28547	0.0720542	0.174593	0.190377	-2.39307	down
MW0135080	6-(5-{8-[1-(2,4-dihydroxyphenyl)-3-(3,4-dihydroxyphenyl)-2-hydroxypropyl]-3,5,7-trihydroxy-3,4-dihydro-2H-1-benzopyran-2-yl}-2-hydroxyphenoxy)-3,4,5-trihydroxyoxane-2-carboxylic acid	Organic acids	Organic acids	C36H36O17	3	0.6741	-	11317.4	41.23	362.67	107.63	14155.2	12321.6	0.455187	0.439531	0.588768	0.440911	-1.18144	insig
MW0136471	6-{4-[3-(3,7-dimethylocta-2,6-dien-1-yl)-7-hydroxy-8-(4-hydroxy-3-methylbut-2-en-1-yl)-4-oxo-4H-chromen-2-yl]-3-hydroxyphenoxy}-3,4,5-trihydroxyoxane-2-carboxylic acid	Organic acids	Organic acids	C36H42O12	3	0.6726	-	1723.66	603.37	2443.79	885.08	5477.72	4833.94	0.64008	0.271497	0.439986	0.42609	-1.23077	insig
MW0128535	[2-(2-hydroxypropan-2-yl)-6-(2-methylbut-3-en-2-yl)-7-oxo-2H,3H,7H-furo[3,2-g]chromen-3-yl]oxidanesulfonic acid	Organic acids	Organic acids	C19H22O8S	3	0.6696	-	299896	331751	363523	765203	765632	712634	1.39155	8.27706e-05	0.00257855	0.443585	-1.17272	down
MW0054251	Lactosylceramide (d18:1/12:0)	SL	Cer	C42H79NO13	3	0.6687	-	134370	61419.7	88501.6	443379	422003	196549	1.24289	0.0727451	0.175844	0.267712	-1.90125	down
MW0057746	PC(DiMe(11,3)/MonoMe(11,3))	GP	PC	C47H83NO10P+	3	0.6686	-	38311.4	39595	22633.6	27073.6	12239	28483	0.770941	0.22103	0.381995	1.48299	0.568506	insig
FDATN00542	2-Hydroxy-1,4-naphthoquinone	Benzene and substituted derivatives	Benzene and substituted derivatives	C10H6O3	3	0.6682	-	47.15	1039.53	11.4	91.37	1662.81	2017.71	0.749405	0.277378	0.445262	0.291122	-1.7803	insig
MW0112488	3,4,5-trihydroxy-6-[2-methoxy-4-(3-oxobut-1-en-1-yl)phenoxy]oxane-2-carboxylic acid	Benzene and substituted derivatives	Benzene and substituted derivatives	C17H20O9	3	0.6679	-	1180.11	2080.11	22.08	3133.56	1332.86	3259.8	0.751126	0.160776	0.309722	0.424826	-1.23506	insig
MW0128622	[2-hydroxy-5-(5,6,7-trihydroxy-4-oxo-4H-chromen-2-yl)phenyl]oxidanesulfonic acid	Organic acids	Organic acids	C15H10O10S	3	0.6673	-	293426	329254	308454	828065	884330	925309	1.40108	0.000852463	0.00963778	0.353009	-1.50222	down
MW0000629	(2-methyl-3-oxo-1-phenylpropoxy)sulfonic acid	Benzene and substituted derivatives	Benzene and substituted derivatives	C10H12O5S	3	0.6668	-	200795	185074	181903	530922	576538	576028	1.40275	0.000467187	0.0069	0.33726	-1.56807	down
MW0055323	N-(dodecanoyl)-sphing-4-enine-1-phosphocholine	SL	SM	C35H71N2O6P	3	0.6667	-	12060.2	10341.6	13639	14157.6	7433.72	3765.61	0.741099	0.363702	0.528069	1.42134	0.50725	insig
MEDL01761	3',5-Dimethoxybibenzyl-3,4'-diol	Others	Stilbene	C16H18O4	3	0.6667	-	8770.2	8420.67	101.54	169.79	18183.2	62.27	0.362582	0.958868	0.975317	0.939024	-0.090766	insig
MW0130968	3-(2,3-dihydroxy-4-methoxyphenyl)-8,8-dimethyl-2H,8H-pyrano[2,3-f]chromen-2-one	Others	Ketone compounds	C21H18O6	3	0.6659	-	987605	889734	1.02225e+06	526304	467134	421381	1.37562	0.000805304	0.00941463	2.04944	1.03523	up
MW0015494	15-keto-PGF1alpha	Lipids	Free fatty acids	C20H34O5	3	0.6656	-	489598	459249	502379	531897	463551	446790	0.0968235	0.924426	0.952782	1.00623	0.00896248	insig
MW0130173	CID 14484601	Others	Ketone compounds	C27H30O16	3	0.6641	-	33118.7	47840.1	43027.7	53960	374.66	258.32	0.948388	0.324108	0.49202	2.27111	1.1834	insig
MW0104977	3-Aminocaproic acid	Organic acids	Organic acids	C6H13NO2	3	0.6608	-	328.59	224.48	444.78	337.4	99.67	7506.81	0.355107	0.44132	0.589206	0.125612	-2.99295	insig
MW0131533	3,4,5-trihydroxy-6-({4-hydroxy-2-oxo-2H-furo[2,3-h]chromen-8-yl}oxy)oxane-2-carboxylic acid	Organic acids	Organic acids	C17H14O11	3	0.6594	-	87195.3	88493.7	126933	241133	282335	283691	1.35805	0.000938406	0.0101292	0.374923	-1.41534	down
MW0001391	1,6-Dimethoxypyrene	Benzene and substituted derivatives	Benzene and substituted derivatives	C18H14O2	3	0.6583	-	11018.4	6518.79	7036.19	12779.5	11516	6935.06	0.598456	0.386923	0.548164	0.786838	-0.345861	insig
MW0012640	17-Octadecynoic acid	Lipids	Free fatty acids	C18H32O2	3	0.6583	-	1470.85	2181.39	267.97	57940.7	56558.1	56188	1.34204	2.2921e-07	0.000308058	0.0229673	-5.44428	down
MW0135344	6-[1-hydroxy-3-(4-hydroxyphenyl)propyl]-2,3-dimethoxyphenol	Benzene and substituted derivatives	Benzene and substituted derivatives	C17H20O5	3	0.6581	-	2.0353e+06	2.5767e+06	2.23515e+06	1.54789e+06	1.57969e+06	1.49564e+06	1.32269	0.0397871	0.114915	1.48104	0.566607	insig
MW0013544	MG(0:0/18:2(9Z,12Z)/0:0)	GL	MG	C21H38O4	3	0.6574	-	19731.5	12814.5	23541.8	58671.5	62753.2	52200.5	1.33782	0.000875541	0.00976075	0.32304	-1.63022	down
MW0139116	Nevadensin	Flavonoids	Flavones	C18H16O7	3	0.6574	-	247764	277618	400193	696695	535945	450355	1.18661	0.0515635	0.136689	0.549957	-0.862609	insig
MW0138521	Isorhamnetin 3-O-[4-Hydroxy-E-cinnamoyl-(->6)-b-D-glucopyranosyl-(1->2)-a-L-rhamnopyranoside]	Flavonoids	Flavones	C37H38O18	3	0.6566	-	22651.8	85318.5	60863.1	30234.3	19640.4	96.61	0.784162	0.148995	0.294774	3.37861	1.75643	insig
MW0129556	1-(3,4-dihydroxyphenyl)-3-hydroxy-3-phenylpropan-1-one	Others	Ketone compounds	C15H14O4	3	0.6563	-	8123.14	4660.3	15396.4	5824.7	4252.22	8743.19	0.532715	0.437056	0.586713	1.49733	0.582389	insig
MW0127901	(2E)-1-{3-[(3,3-dimethyloxiran-2-yl)methyl]-2,4,6-trihydroxyphenyl}-3-(4-hydroxyphenyl)prop-2-en-1-one	Others	Ketone compounds	C20H20O6	3	0.6561	-	8179.86	5709.98	8614.21	3299.9	1287.46	645.82	1.21089	0.00917807	0.0420045	4.30026	2.10442	up
MW0113611	6-{[1,4-dihydroxy-1-(1-oxo-1H-isochromen-3-yl)butan-2-yl]oxy}-3,4,5-trihydroxyoxane-2-carboxylic acid	Organic acids	Organic acids	C19H22O11	3	0.6559	-	27715.6	35505.9	15170.8	63105	22284	48569.3	0.751431	0.261051	0.429264	0.585199	-0.773001	insig
MW0055527	[(2R)-2-octanoyloxy-3-phosphonooxypropyl] decanoate	GP	PA	C21H41O8P	3	0.655	-	1353.06	1299.72	1945.03	3895.53	5903.49	10610.2	1.2838	0.116344	0.248464	0.225281	-2.1502	down
MW0137585	DL-Carbidopa	Heterocyclic compounds	Heterocyclic compounds	C10H14N2O4	3	0.6544	-	74833.6	73191.2	78911.1	111583	113825	110605	1.39648	0.000251914	0.00490685	0.675379	-0.566231	insig
MW0132265	3,4,5-trihydroxy-6-{[8-(2-hydroxypropan-2-yl)-4-(3-hydroxypropyl)-2-oxo-2H,8H,9H-furo[2,3-h]chromen-5-yl]oxy}oxane-2-carboxylic acid	Organic acids	Organic acids	C23H28O12	3	0.6531	-	1135.2	713.7	828.44	1054.13	219.52	359.17	0.820824	0.314753	0.482175	1.6397	0.713435	insig
MW0128905	{[(2E)-5-[6-(5,7-dihydroxy-4-oxo-3,4-dihydro-2H-1-benzopyran-2-yl)-7-hydroxy-2-methyl-2H-chromen-2-yl]-2-methylpent-2-en-1-yl]oxy}sulfonic acid	Organic acids	Organic acids	C25H26O10S	3	0.653	-	30.18	81952.5	238.63	92.84	74478.7	13.42	0.123372	0.948298	0.969703	1.10238	0.140627	insig
MW0108360	N(1),N(12)-diacetylsperminium(2+)	Alcohol and amines	Polyamines	C14H32N4O2+2	3	0.653	-	72438.9	100503	102991	95605.7	96633.6	122624	0.620861	0.381603	0.544068	0.876361	-0.190404	insig
MW0128826	[5-(5,7-dihydroxy-4-oxo-3,4-dihydro-2H-1-benzopyran-2-yl)-2-hydroxyphenyl]oxidanesulfonic acid	Organic acids	Organic acids	C15H12O9S	3	0.6516	-	758024	830756	774448	1.71305e+06	1.76694e+06	1.71109e+06	1.40277	6.95609e-06	0.000825688	0.455248	-1.13528	down
MW0106365	4-Azaniumyl-4,5-dihydro-1,2-oxazol-3-olate	Organic acids	Organic acids	C3H6N2O2	3	0.6507	-	195200	206634	214752	112578	113712	116622	1.39976	0.00275969	0.0195379	1.79809	0.846463	insig
MW0106525	D-Phenylalanine	Organic acids	Organic acids	C9H11NO2	3	0.6498	-	414141	421197	423328	559205	519952	554348	1.38383	0.00729586	0.0363172	0.770531	-0.376075	insig
MEDP2074	Indirubin-3'-monoxime	Benzene and substituted derivatives	Benzene and substituted derivatives	C16H11N3O2	3	0.6494	-	6787.62	7132.33	7589.51	8162.66	1224.55	7745.49	0.538892	0.583289	0.699947	1.25546	0.328219	insig
MW0136274	6-{3,5-dihydroxy-4-[2-(4-hydroxyphenyl)propanoyl]phenoxy}-3,4,5-trihydroxyoxane-2-carboxylic acid	Organic acids	Organic acids	C21H22O11	3	0.649	-	12442	11019.6	13015.4	34908.4	28200.3	30764.4	1.38754	0.00636131	0.0330952	0.388578	-1.36372	down
MW0056770	Pantoyllactone glucoside	FA	Others	C12H20O8	3	0.6484	-	5548.67	8057.65	5505.21	1769.17	1637.73	893.28	1.33593	0.0198724	0.0711308	4.44436	2.15197	up
MW0059186	PE-NMe(11D3/9D3)	GP	PE	C44H76NO10P	3	0.6482	-	6857.59	13773	5771.61	2904.3	8818.98	19517.3	0.0349715	0.787363	0.852941	0.845126	-0.242761	insig
MW0131823	3,4,5-trihydroxy-6-[2-hydroxy-4-(3,5,6-trihydroxy-4-oxo-7-{[3,4,5-trihydroxy-6-(hydroxymethyl)oxan-2-yl]oxy}-4H-chromen-2-yl)phenoxy]oxane-2-carboxylic acid	Organic acids	Organic acids	C27H28O19	3	0.6481	-	2725.8	980.32	488.88	209.87	3581.21	27.96	0.588771	0.930981	0.956845	1.09844	0.135461	insig
MW0006821	Diethyl phthalate	Benzene and substituted derivatives	Benzene and substituted derivatives	C12H14O4	3	0.6476	-	2401.57	772.8	3559.98	652.63	4492.97	4540.55	0.20395	0.559097	0.681669	0.695256	-0.524385	insig
MW0118706	2-methyl-2-(4-methylpent-3-en-1-yl)-2H-chromene-6,8-diol	Alcohol and amines	Alcohols	C16H20O3	3	0.6466	-	73603.3	90409.4	78177.2	34998.8	30570.3	41208.1	1.36262	0.00319019	0.0213314	2.26818	1.18154	up
MW0005861	Benzanthrone	Alkaloids	Alkaloids	C17H10O	3	0.6463	-	62612.7	68822.5	68772.2	47631.3	47940.7	46086.4	1.38079	0.00737285	0.0366287	1.41331	0.499078	insig
MW0145989	Asn-Phe	Amino acids and derivatives	Amino acids and derivatives	C13H17N3O4	3	0.6458	-	142968	132571	140923	384463	353581	334954	1.40028	0.00306582	0.0207755	0.38813	-1.36539	down
MW0012804	1-Heptadecanoyl-glycero-3-phosphate	GP	PA	C20H41O7P	3	0.6454	-	4536.9	2227.56	1967.93	146.7	911.92	202.13	1.22573	0.0821683	0.191726	6.92635	2.79209	up
MW0049503	1-Myristoyl-3-eicsoatetraenoyl-sn-glycerol	GL	DG	C37H64O5	3	0.6443	-	12681.8	9037.84	17317.1	19536.5	23953.8	12818.7	0.807828	0.231831	0.393616	0.693261	-0.52853	insig
MW0054500	LysoPA(22:0/0:0)	GP	LPA	C25H51O7P	3	0.6443	-	1372.85	942.14	2290.39	1418.77	773.85	1175.62	0.567428	0.420829	0.574681	1.3673	0.451325	insig
MW0129677	Dibenzoylmethane	Benzene and substituted derivatives	Benzene and substituted derivatives	C15H12O2	3	0.6442	-	35435.9	26411.6	30698.4	51069.8	37626.5	54044.9	1.17582	0.0604482	0.154094	0.648347	-0.625161	insig
MW0054153	11-Methyldodecanoic acid	Lipids	Free fatty acids	C13H26O2	3	0.6439	-	23303.2	21634.6	8057.15	209997	218275	229196	1.36089	1.26041e-05	0.00105875	0.0806048	-3.63299	down
MW0130765	2'-Hydroxybenzoin	Others	Ketone compounds	C14H12O3	3	0.6427	-	3375.5	1070.01	335.95	1299.11	50.01	1366.72	0.452	0.54724	0.673509	1.76058	0.816053	insig
MW0112394	Quinol glucuronide	Organic acids	Organic acids	C12H14O8	3	0.6419	-	648.23	1131.75	564.89	796.9	1126.7	700.6	0.369099	0.694242	0.786044	0.893556	-0.16237	insig
MW0135536	6-[4-(3-{3-[(3,3-dimethyloxiran-2-yl)methyl]-2,4,6-trihydroxyphenyl}-3-oxopropyl)-3-hydroxyphenoxy]-3,4,5-trihydroxyoxane-2-carboxylic acid	Organic acids	Organic acids	C26H30O13	3	0.6389	-	3480.76	104.04	762.12	932.24	505.26	263.42	0.171071	0.484849	0.626976	2.55563	1.35368	insig
MEDP1089	Humic acid	Organic acids	Organic acids	C9H9NO6	3	0.6388	-	3728.26	3468.54	6224.86	10530	14774.1	21449.5	1.28494	0.0638907	0.160646	0.287072	-1.80052	down
MW0064204	TG(10:0/8:0/8:0)	GL	TG	C29H54O6	3	0.6379	-	785.37	1530.64	1924.73	2116.87	695.38	900.7	0.295267	0.768376	0.840496	1.14215	0.19175	insig
MEDP2252	Phenylethylmalonamide	Benzene and substituted derivatives	Benzene and substituted derivatives	C11H14N2O2	3	0.6378	-	605273	561714	613341	320614	360426	349634	1.38877	0.000372459	0.00605547	1.72734	0.788555	insig
MW0123681	Dihydrorhodamine 123	Heterocyclic compounds	Heterocyclic compounds	C21H18N2O3	3	0.6362	-	1062.68	741.96	705.8	167.94	355.72	1980.75	0.463633	0.997557	0.9983	1.00241	0.00346948	insig
MW0131167	3-(3,5-dihydroxyphenyl)-2-(4-hydroxyphenyl)-4-[(E)-2-(4-hydroxyphenyl)ethenyl]-2,3-dihydro-1-benzofuran-5,6-diol	Benzene and substituted derivatives	Benzene and substituted derivatives	C28H22O7	3	0.6354	-	8754.84	4690.59	1988.67	14626.7	2321.72	13377	0.5099	0.340398	0.507154	0.508948	-0.974409	insig
MW0111223	N-Nitrosodibutylamine	Alcohol and amines	Amines	C8H18N2O	3	0.6352	-	64.04	779.09	64.81	719.34	33.71	99.79	0.0544495	0.957422	0.97498	1.06461	0.0903219	insig
MW0114657	2,6-Dimethoxy-4-[(E)-3-(beta-D-glucopyranosyloxy)-1-propenyl]phenyl beta-D-glucopyranoside	Benzene and substituted derivatives	Benzene and substituted derivatives	C23H34O14	3	0.6327	-	2275.34	1646.25	1866.47	5473.15	1996.52	4503.78	0.999404	0.181468	0.337335	0.483408	-1.04869	insig
MW0137149	8-[1-(2,4-dihydroxyphenyl)-2-hydroxy-3-(3-hydroxyphenyl)propyl]-2-(4-hydroxy-3-methoxyphenyl)-3,4-dihydro-2H-1-benzopyran-3,5,7-triol	Benzene and substituted derivatives	Benzene and substituted derivatives	C31H30O10	3	0.6318	-	52956.5	52666.8	48930.2	44768.2	62533.4	54017.4	0.235514	0.707247	0.794987	0.958062	-0.0618096	insig
MW0147047	Candicine	Alkaloids	Phenolamine	C11H18NO+	3	0.6317	-	637.01	620.8	609.88	572.28	985.65	45.66	0.514774	0.77696	0.845534	1.16469	0.21995	insig
MW0000023	(+/-)-6-Acetonyldihydrosanguinarine	Alkaloids	Isoquinoline alkaloids	C23H19NO5	3	0.6316	-	26492.5	50159.8	57951.7	458644	446994	455310	1.37844	0.000126629	0.00333703	0.0989046	-3.33782	down
MW0131999	3,4,5-trihydroxy-6-{[2-(3-hydroxyphenyl)-5-methoxy-6,8-dimethyl-4-oxo-3,4-dihydro-2H-1-benzopyran-7-yl]oxy}oxane-2-carboxylic acid	Organic acids	Organic acids	C24H26O11	3	0.6308	-	24790.6	17881.9	22981.2	18694.7	11608.5	19665.5	0.839322	0.188532	0.345214	1.3139	0.393852	insig
MW0050206	1-Linoleoyl-3-docosahexaenoyl-sn-glycerol	GL	DG	C44H70O5	3	0.6296	-	9.45677e+07	8.52685e+07	8.96856e+07	1.0049e+08	9.631e+07	9.34675e+07	1.00619	0.114639	0.245995	0.928528	-0.106982	insig
MW0000459	Tetrahydroharmine	Alkaloids	Alkaloids	C13H16N2O	3	0.6279	-	759.16	44.95	94.65	2901.88	1886.63	2413.24	1.19781	0.00573411	0.031117	0.124797	-3.00234	down
MW0132007	3,4,5-trihydroxy-6-{[2-(4-hydroxyphenyl)-8-methoxy-4-oxo-3,4-dihydro-2H-1-benzopyran-7-yl]oxy}oxane-2-carboxylic acid	Organic acids	Organic acids	C22H22O11	3	0.6279	-	624.74	492.5	502.72	301.33	3082.51	284.57	0.157457	0.53928	0.668238	0.441597	-1.1792	insig
MW0012197	11-(3,4-Dimethyl-5-pentylfuran-2-yl)undec-10-enoic acid	FA	Others	C22H36O3	3	0.6273	-	299.93	34.22	322.02	2513.85	754.74	357.85	0.97265	0.27252	0.440719	0.180941	-2.46641	insig
MW0141699	1-Caffeoyl-beta-D-glucose	Phenolic acids	Phenolic acids	C15H18O9	3	0.627	-	7155.02	8472.56	10401.6	11393.3	12831.7	10684.2	1.0988	0.0682468	0.16861	0.745626	-0.423475	insig
MW0135079	6-(5-{8-[1-(2,4-dihydroxyphenyl)-2-hydroxy-3-(3-hydroxyphenyl)propyl]-3,5,7-trihydroxy-3,4-dihydro-2H-1-benzopyran-2-yl}-2-hydroxyphenoxy)-3,4,5-trihydroxyoxane-2-carboxylic acid	Organic acids	Organic acids	C36H36O16	3	0.627	-	12885.2	11432	10528.2	13769.8	15669.1	15384.8	1.22641	0.0222058	0.0761989	0.777388	-0.363293	insig
MW0129952	2-(1,2-dihydroxypropan-2-yl)-6-(2-methylbut-3-en-2-yl)-2H,3H,7H-furo[3,2-g]chromen-7-one	Others	Ketone compounds	C19H22O5	3	0.6262	-	11311.2	25030.1	35814.5	22146.1	27070.8	9754.01	0.273984	0.644754	0.75014	1.22358	0.291111	insig
MW0049802	1,2-Dipalmitoyl-sn-glycerol	GL	DG	C35H68O5	3	0.6258	-	146380	1.21562e+06	523597	282655	782168	576516	0.105421	0.829531	0.884116	1.14882	0.200152	insig
MW0106383	4-(Isopropylamino)-2-(2-pyridyl)-2-phenylbutyramide	Alcohol and amines	Amines	C18H23N3O	3	0.6253	-	37653.7	34390	39528	37153.6	20806.1	39967.5	0.521371	0.52957	0.662291	1.13933	0.18819	insig
MW0137186	8-C-Ascorbylepigallocatechin 3-gallate	Flavonoids	Flavones	C28H24O17	3	0.6246	-	862.58	745.96	2030.81	8881.2	19439.9	19234	1.34296	0.0505149	0.134543	0.0765292	-3.70784	down
MW0134931	6-(3-{8-[1-(2,4-dihydroxyphenyl)-2-hydroxy-3-(3-hydroxyphenyl)propyl]-3,5,7-trihydroxy-3,4-dihydro-2H-1-benzopyran-2-yl}phenoxy)-3,4,5-trihydroxyoxane-2-carboxylic acid	Organic acids	Organic acids	C36H36O15	3	0.6245	-	16101.2	14090.1	27738.5	1560.92	1189.46	1464.86	1.38624	0.0519891	0.137546	13.7429	3.78062	up
MW0137885	Dehydrocarpaine II	Heterocyclic compounds	Heterocyclic compounds	C28H46N2O4	3	0.6239	-	1469.77	892.57	3106.43	1310.22	3106.81	1114.3	0.0515266	0.982956	0.988595	0.98869	-0.01641	insig
MW0137370	Flavone base + 3O, O-HexA-FeruloylHexA	Flavonoids	Flavones	C37H34O20	3	0.6235	-	3147.12	1966	4430.93	9416.02	14385.8	10350.2	1.30182	0.0188446	0.0688219	0.279458	-1.8393	down
MW0056864	PC(15:0/20:4(5Z,8Z,11Z,14Z))	GP	PC	C43H78NO8P	3	0.6228	-	7698.63	20583.8	4873.24	14876.4	11947.6	17782.1	0.661913	0.520312	0.654366	0.743299	-0.427986	insig
MW0130081	2-(2-hydroxy-3,4-dimethoxyphenyl)-1-(2,4,6-trihydroxyphenyl)propan-1-one	Others	Ketone compounds	C17H18O7	3	0.6227	-	86187.4	117405	121364	275091	274368	269514	1.36984	0.00380164	0.0239503	0.396784	-1.33357	down
MW0049590	1-(9Z-tetradecenoyl)-2-(9Z-hexadecenoyl)-sn-glycerol	GL	DG	C33H60O5	3	0.6227	-	245263	245793	234386	280422	286755	283978	1.37672	0.00231738	0.0177725	0.852304	-0.230561	insig
MW0142009	2,3-dihydroxy-3-methylvalerate	Organic acids	Organic acids	C6H12O4	3	0.6223	-	51852.1	52052.7	48359	53305.6	49566.3	46874.7	0.271079	0.727413	0.809878	1.01681	0.0240502	insig
MW0056904	1-hexadecanoyl-2-(4Z,7Z,10Z,13Z,16Z-docosapentaenoyl)-sn-glycero-3-phosphocholine	GP	PC	C46H82NO8P	3	0.6213	-	45876.5	27268.5	33591.3	171724	72497.5	118523	1.26297	0.0918864	0.209432	0.294247	-1.7649	down
MW0128474	[(5,6,12,13,14-pentahydroxy-9-oxo-11-{6,7,13,14-tetrahydroxy-3,10-dioxo-2,9-dioxatetracyclo[6.6.2.0,(1).0(1)(1),(1)]hexadeca-1(15),4,6,8(16),11,13-hexaen-5-yl}-3,8-dioxatricyclo[8.4.0.0(2),]tetradeca-1(14),10,12-trien-4-yl)methoxy]sulfonic acid	Organic acids	Organic acids	C27H18O20S	3	0.6171	-	164391	161579	97679.2	412177	569530	609559	1.34235	0.0146106	0.0579174	0.266234	-1.90923	down
MW0132364	3,4,5-trihydroxy-6-{2-hydroxy-4-[3-oxo-3-(2,4,6-trihydroxyphenyl)prop-1-en-1-yl]phenoxy}oxane-2-carboxylic acid	Benzene and substituted derivatives	Benzene and substituted derivatives	C21H20O12	3	0.6171	-	541.48	337.3	457.45	134	92.2	146.7	1.34312	0.0254686	0.08431	3.58335	1.84131	up
MW0113606	6-{[1-(2-{[3-(3,4-dimethoxyphenyl)-1-hydroxyprop-2-en-1-ylidene]amino}ethyl)-3-methoxy-4-oxocyclohexa-2,5-dien-1-yl]oxy}-3,4,5-trihydroxyoxane-2-carboxylic acid	Organic acids	Organic acids	C26H31NO12	3	0.6162	-	13228.5	16429.8	15228.9	10534.4	6085.7	11917.2	1.05355	0.0704128	0.172219	1.57293	0.653457	insig
MW0051656	[(2S)-3-hydroxy-2-(10-methylundecanoyloxy)propyl] 10-methylundecanoate	GL	DG	C27H52O5	3	0.616	-	1127.03	24741.5	21243.1	33776.2	30254	82500	0.867112	0.178236	0.333325	0.321515	-1.63704	insig
MW0136347	6-{4-[(2,4-dihydroxy-3-oxo-6-{[3,4,5-trihydroxy-6-(hydroxymethyl)oxan-2-yl]oxy}-2,3-dihydro-1-benzofuran-2-yl)methyl]phenoxy}-3,4,5-trihydroxyoxane-2-carboxylic acid	Organic acids	Organic acids	C27H30O17	3	0.6159	-	38.03	25420.9	26337.7	443.01	19234.6	212.08	0.237616	0.380335	0.543028	2.60419	1.38084	insig
MEDL02594	Citromitin	Flavonoids	Flavanones	C21H24O8	3	0.6154	-	69220.6	70114.7	74088.1	67621.8	77316.7	74361	0.389615	0.587482	0.703897	0.973205	-0.0391842	insig
MW0130295	2-(4-Methoxyphenyl)-1-(2,4,5-trihydroxyphenyl)propan-1-one	Others	Ketone compounds	C16H16O5	3	0.615	-	271993	273176	290414	271515	260831	283290	0.500954	0.492402	0.63329	1.02446	0.0348584	insig
MW0135449	6-[3-(3-{[3,4-dihydroxy-5-(hydroxymethyl)oxolan-2-yl]oxy}-5,7-dihydroxy-4-oxo-3,4-dihydro-2H-1-benzopyran-2-yl)phenoxy]-3,4,5-trihydroxyoxane-2-carboxylic acid	Organic acids	Organic acids	C26H28O16	3	0.6149	-	3519.68	621.37	129561	260671	240884	4510.04	0.685376	0.272758	0.440719	0.264199	-1.9203	insig
MW0059274	PE-NMe(14:1(9Z)/18:4(6Z,9Z,12Z,15Z))	GP	PE	C38H66NO8P	3	0.6145	-	4818.91	7583.41	1596.66	5023.1	2973.61	6100.51	0.203101	0.987693	0.992014	0.993031	-0.010089	insig
MW0110244	Tyr-Cys	Amino acids and derivatives	Amino acids and derivatives	C12H16N2O4S	3	0.6131	-	11.2	321.31	395.95	89.96	285.82	40.14	0.0593816	0.503971	0.641333	1.75144	0.808544	insig
MW0128584	[2,6-dihydroxy-3-(7-hydroxy-4-oxo-4H-chromen-2-yl)phenyl]oxidanesulfonic acid	Organic acids	Organic acids	C15H10O9S	3	0.6119	-	1.6313e+06	1.58667e+06	1.69103e+06	3.70621e+06	3.52764e+06	3.23233e+06	1.3975	0.00402129	0.0247918	0.469034	-1.09223	down
MW0135078	6-(5-{8,8-dimethyl-2-oxo-2H,8H-pyrano[2,3-f]chromen-3-yl}-4-hydroxy-2-methoxyphenoxy)-3,4,5-trihydroxyoxane-2-carboxylic acid	Organic acids	Organic acids	C27H26O12	3	0.607	-	498.09	1475.89	505.43	407.82	33.17	68.01	1.08248	0.170661	0.322172	4.87114	2.28426	up
MW0135262	6-[(2-benzyl-2,4,5-trihydroxy-3-oxo-2,3-dihydro-1-benzofuran-6-yl)oxy]-3,4,5-trihydroxyoxane-2-carboxylic acid	Organic acids	Organic acids	C21H20O12	3	0.6064	-	815.16	612.09	690.31	1162.61	320.52	1060.73	0.0773599	0.649138	0.753036	0.83242	-0.264616	insig
MW0130528	2-[1-hydroxy-3-(4-hydroxyphenyl)propyl]-3,5-dimethoxyphenol	Benzene and substituted derivatives	Benzene and substituted derivatives	C17H20O5	3	0.6045	-	737744	190376	646849	614790	879943	530420	0.54468	0.501204	0.640119	0.777704	-0.362708	insig
MEDP1139	(9E,12E)-N-(2-Hydroxyethyl)octadeca-9,12-dienamide	Alcohol and amines	Amines	C20H37NO2	3	0.6039	-	9872.67	5713.52	7075.7	95128.9	61844.4	78533.2	1.38673	0.0166036	0.0630969	0.0962261	-3.37743	down
MW0004227	4-(2,4-dihydroxy-5-methoxyphenyl)butan-2-one	Phenolic acids	Phenolic acids	C11H14O4	3	0.6032	-	28.75	4542.44	145.74	3101.78	81.95	10312.9	0.515686	0.452005	0.598124	0.349491	-1.51667	insig
MW0113715	cis-Ferulic acid 4-glucuronide	Organic acids	Organic acids	C16H18O10	3	0.603	-	391102	457224	447592	528426	578797	546339	1.28047	0.0117986	0.0498225	0.783713	-0.351603	insig
MEDP1398	Carnitine C16:1	FA	CAR	C23H43NO4	3	0.6027	-	495.28	3572.47	4365.49	3876.47	4538.27	2719.32	0.55252	0.540412	0.669003	0.757427	-0.400821	insig
MW0000248	(6aR,9R,10aR)-N-[(1S,2S,4R,7S)-2-hydroxy-7-methyl-5,8-dioxo-4-propan-2-yl-3-oxa-6,9-diazatricyclo[7.3.0.02,6]dodecan-4-yl]-7-methyl-6,6a,8,9,10,10a-hexahydro-4H-indolo[4,3-fg]quinoline-9-carboxamide	Alkaloids	Alkaloids	C29H37N5O5	3	0.6011	-	905.7	2342.55	2096.07	2955.17	3807.82	2473.28	0.963181	0.094182	0.212492	0.578623	-0.789304	insig
FDATN00327	Manidipine	Benzene and substituted derivatives	Benzene and substituted derivatives	C35H38N4O6	3	0.6002	-	4672.85	4305.46	3963.11	9789.51	8304.13	7712.72	1.36611	0.0131708	0.0537436	0.501482	-0.995731	insig
MW0108562	Phenylbutyrylglutamine	Alcohol and amines	Amines	C15H20N2O4	3	0.5957	-	3159.03	413.83	3985.11	2290.36	3511.73	3107.49	0.47388	0.724124	0.80774	0.848297	-0.237359	insig
MW0112645	3,4,5-trihydroxy-6-[2-hydroxy-4-[(E)-3-oxo-3-[(3,4,5,6-tetrahydroxyoxan-2-yl)methoxy]prop-1-enyl]phenoxy]oxane-2-carboxylic acid	Organic acids	Organic acids	C21H26O15	3	0.5955	-	1461.84	1514.61	1531.71	312.95	279.63	529.34	1.35647	0.00292673	0.0201375	4.01825	2.00657	up
MW0135751	6-{[2-(2,4-dihydroxyphenyl)-7-methoxy-6-(3-methylbut-1-en-1-yl)-3-(3-methylbut-2-en-1-yl)-4-oxo-4H-chromen-5-yl]oxy}-3,4,5-trihydroxyoxane-2-carboxylic acid	Benzene and substituted derivatives	Benzene and substituted derivatives	C32H36O12	3	0.5948	-	102.13	70.26	357.07	252.33	395.5	16.95	0.0876734	0.768579	0.840496	0.796444	-0.328355	insig
MW0131816	3,4,5-trihydroxy-6-[2-hydroxy-2-(9-{[(2E)-2-methylbut-2-enoyl]oxy}-2-oxo-2H,8H,9H-furo[2,3-h]chromen-8-yl)propoxy]oxane-2-carboxylic acid	Organic acids	Organic acids	C25H28O13	3	0.5902	-	309.81	245.26	679.93	340.95	352.51	190.57	0.486614	0.487736	0.629498	1.39701	0.482344	insig
MW0131956	3,4,5-trihydroxy-6-[5-methoxy-2-(4,5,7-trihydroxy-3,4-dihydro-2H-1-benzopyran-3-yl)phenoxy]oxane-2-carboxylic acid	Organic acids	Organic acids	C22H24O12	3	0.5889	-	37.62	67.41	153.88	91.84	1827.77	1566.33	1.0075	0.184298	0.340288	0.0742726	-3.75103	down
MW0127779	1,7-Bis(4-hydroxyphenyl)-5-hydroxy-1-heptene-3-one	Others	Ketone compounds	C19H20O4	3	0.5869	-	578.21	601.1	2508.86	153.27	691.6	669.64	0.728207	0.375878	0.538955	2.43522	1.28405	insig
MEDP0780	Octylamine	Alkaloids	Alkaloids	C8H19N	3	0.5847	-	1340.49	1456.21	1813.08	1404.14	69.31	928.79	0.762581	0.19199	0.349324	1.91895	0.940318	insig
MEDP1156	(2S)-3-hydroxypropane-1,2-diyl didecanoate	GL	DG	C23H44O5	3	0.5845	-	1534.24	824.7	1220.66	5517.43	3820.78	3256.08	1.31641	0.0381916	0.111586	0.284224	-1.8149	down
MW0130274	CID 74977408	Others	Ketone compounds	C22H22O10	3	0.5805	-	26375.2	30653.3	2437.49	497.46	672.32	279.22	1.24897	0.158482	0.307803	41.0394	5.35894	up
MW0104538	2-amino-4-({1-[(carboxymethyl)-C-hydroxycarbonimidoyl]-2-[(1-hydroxy-5-oxo-1,7-diphenylheptan-2-yl)sulfanyl]ethyl}-C-hydroxycarbonimidoyl)butanoic acid	Organic acids	Organic acids	C29H37N3O8S	3	0.5805	-	1161.57	95.73	652.35	2004.1	1627.99	56.73	0.159458	0.442062	0.589695	0.517686	-0.949851	insig
MW0130269	2-(4-hydroxy-3,5-dimethoxyphenyl)-4H-chromen-4-one	Others	Ketone compounds	C17H14O5	3	0.5797	-	3089.94	12627.6	13483.9	319277	385398	378014	1.36289	0.0029116	0.0200943	0.0269713	-5.21243	down
MW0112545	3,4,5-Trihydroxy-6-(5-hydroxy-2-methoxy-4-prop-2-enylphenoxy)oxane-2-carboxylic acid	Organic acids	Organic acids	C16H20O9	3	0.5795	-	34383.7	37376.8	33901.7	33010.8	31137.3	35888.3	0.67016	0.349289	0.514553	1.05624	0.0789335	insig
MW0152600	Leu-Gln	Amino acids and derivatives	Amino acids and derivatives	C11H21N3O4	3	0.5794	-	216137	206913	209429	444146	415090	402071	1.40093	0.00242475	0.0181627	0.501447	-0.995831	insig
MW0131715	3,4,5-Trihydroxy-6-[[3,4,5-trihydroxy-6-[[2-(2-hydroxypropan-2-yl)-7-oxo-2,3-dihydrouro[3,2-g]chromen-9-yl]oxy]oxan-2-yl]methoxy]oxane-2-carboxylic acid	Organic acids	Organic acids	C26H32O16	3	0.5787	-	282.03	40.78	100.11	196.59	66.57	34.45	0.283369	0.662478	0.762957	1.42105	0.506962	insig
MW0131727	3,4,5-trihydroxy-6-[(3-oxo-1,7-diphenylhept-4-en-2-yl)oxy]oxane-2-carboxylic acid	Benzene and substituted derivatives	Benzene and substituted derivatives	C25H28O8	3	0.5785	-	43061.2	4129.95	532511	1.7522e+06	1.72651e+06	1.94563e+06	1.11842	0.0049717	0.0284351	0.106871	-3.22606	down
MW0121652	5-methyltetrahydropteroyltri-L-glutamate	Amino acids and derivatives	Amino acids and derivatives	C30H39N9O12	3	0.5771	-	161005	184644	177297	145016	154588	159176	1.12394	0.0717764	0.174285	1.13986	0.188856	insig
MW0055560	PA(14:0/22:4(7Z,10Z,13Z,16Z))	GP	PA	C39H69O8P	3	0.5749	-	8171.15	8299.8	5416.38	3453.77	4265.54	2003.61	1.18966	0.0290147	0.0922613	2.25111	1.17063	up
MEDL02619	[(3S,4R,5S)-5-[(2S,3R,4S,5S,6R)-2-[4-[(E)-3-(2,4-dihydroxyphenyl)-3-oxoprop-1-enyl]phenoxy]-4,5-dihydroxy-6-(hydroxymethyl)oxan-3-yl]oxy-3,4-dihydroxyoxolan-3-yl]methyl (E)-3-(4-hydroxyphenyl)prop-2-enoate	Flavonoids	Dihydroisoflavones	C35H36O15	3	0.5721	-	271808	281360	256499	383569	332198	355079	1.32597	0.0145291	0.0578987	0.7561	-0.403351	insig
MW0139429	(2,6-diamino-10,10-dihydroxy-5-oxido-9-sulooxy-3a,4,8,9-tetrahydro-1H-pyrrolo[1,2-c]purin-5-ium-4-yl)methoxycarbonylsulamic acid	Heterocyclic compounds	Heterocyclic compounds	C10H17N7O12S2	3	0.5714	-	2055.96	6499.9	3530.73	9362.88	9908.65	4222.05	0.89019	0.170981	0.32246	0.514464	-0.958859	insig
MW0013811	3,4,5-trihydroxy-6-{1-methoxy-1,3-dioxo-3-[(3,4,5,6-tetrahydroxyoxan-2-yl)methoxy]propan-2-yl}oxane-2-carboxylic acid	Organic acids	Organic acids	C16H24O15	3	0.5695	-	774.21	806.59	917.38	1097.34	197.75	82.43	0.848427	0.364217	0.528263	1.81353	0.858804	insig
MW0013478	2-Hexaprenyl-6-methoxy-1,4-benzoquinone	Benzene and substituted derivatives	Benzene and substituted derivatives	C37H54O3	3	0.5686	-	92177.9	89140.7	94260.6	257672	253578	245390	1.40554	8.37587e-05	0.00257855	0.364215	-1.45714	down
MW0056798	PC(14:0/20:4(5Z,8Z,11Z,14Z))	GP	PC	C42H76NO8P	3	0.5673	-	5220.39	2478.7	287.47	21710.2	11601.4	10227.4	1.0855	0.0666914	0.166222	0.183435	-2.44666	down
MW0104092	3,6,11,12-Tetrakis(acetyloxy)-5-(4-hydroxyphenyl)-8-oxatricyclo[7.4.0.0^{2,7}]trideca-1(13),2,4,6,9,11-hexaen-4-yl acetate	Organic acids	Organic acids	C28H22O12	3	0.5638	-	41345.6	46838.4	38004.3	145309	150459	133616	1.39769	0.000374811	0.00605547	0.293882	-1.76669	down
MW0011128	(3alpha,5alpha,22R,23R)-Cholestane-3,22,23-triol	Alcohol and amines	Alcohols	C27H48O3	3	0.5635	-	146850	157069	112625	156089	174901	167563	0.930762	0.168296	0.31975	0.835506	-0.259278	insig
MW0112447	3,4,5-trihydroxy-6-[1-(4-methoxyphenyl)-3-oxopropoxy]oxane-2-carboxylic acid	Organic acids	Organic acids	C16H20O9	3	0.5598	-	2775.98	3740.47	153.95	1277.32	1183.27	1109.49	0.0113735	0.436627	0.586435	1.86842	0.901817	insig
MW0054499	LysoPA(21:0/0:0)	GP	LPA	C24H49O7P	3	0.5594	-	2032.31	374.02	3457.85	684.66	2675.45	326.87	0.367745	0.564228	0.685183	1.59051	0.66949	insig
MW0005123	4-Hydroxypropranolol	Benzene and substituted derivatives	Benzene and substituted derivatives	C16H21NO3	3	0.5575	-	9727.84	107.59	13524.5	5970.97	7064.53	3860.1	0.353594	0.647161	0.75205	1.3826	0.467387	insig
MW0134314	Viniferin	Benzene and substituted derivatives	Benzene and substituted derivatives	C28H22O6	3	0.5523	-	107974	111840	145688	246159	242114	236918	1.35665	0.00748664	0.0369928	0.504008	-0.988481	insig
MEDP2118	2,3-Bis(4-hydroxyphenyl)propionitrile	Benzene and substituted derivatives	Benzene and substituted derivatives	C15H13NO2	3	0.5514	-	3252.26	5169.49	4037.2	2830.46	2519.64	3855.49	0.890315	0.196562	0.354444	1.35341	0.4366	insig
MW0135201	6,8-bis[2-(3,4-dihydroxyphenyl)-3,7-dihydroxy-3,4-dihydro-2H-1-benzopyran-4-yl]-2-(4-hydroxy-3-methoxyphenyl)-3,4-dihydro-2H-1-benzopyran-3,5,7-triol	Benzene and substituted derivatives	Benzene and substituted derivatives	C46H40O16	3	0.5497	-	660.22	651.74	329.6	46.28	1777.56	281.77	0.380988	0.8042	0.86445	0.779613	-0.359171	insig
MW0139337	Phenyl 2,5-dihydroxybenzoate	Benzene and substituted derivatives	Benzene and substituted derivatives	C13H10O4	3	0.5489	-	29717.5	72712.8	108791	291087	290953	283281	1.2592	0.0100863	0.044641	0.244096	-2.03448	down
MW0000672	(3E)-4-phenylbuta-1,3-dien-2-ol	Benzene and substituted derivatives	Benzene and substituted derivatives	C10H10O	3	0.5483	-	28942.4	26137.8	28895.2	25795.1	26010.8	27625	0.796703	0.250603	0.417189	1.05721	0.0802665	insig
MEDP2158	6-Amino-4-(4-phenoxyphenylethylamino)quinazoline	Benzene and substituted derivatives	Benzene and substituted derivatives	C22H20N4O	3	0.5425	-	491.28	83.84	554.49	579.74	27.09	476.63	0.220921	0.948788	0.969957	1.0426	0.0601789	insig
MW0127902	(2E)-1-{3-[(3,3-dimethyloxiran-2-yl)methyl]-2,4,6-trihydroxyphenyl}-3-phenylprop-2-en-1-one	Others	Ketone compounds	C20H20O5	3	0.5399	-	565884	551919	564276	772298	737395	800048	1.38974	0.00520851	0.0292897	0.728254	-0.457486	insig
MW0013768	3,4,5-trihydroxy-6-[1-(7-methoxy-2-oxo-2H-chromen-6-yl)-3-oxobutoxy]oxane-2-carboxylic acid	Organic acids	Organic acids	C20H22O11	3	0.5395	-	702.04	10007.1	9938.4	9444.84	8861.19	7832.78	0.545448	0.615133	0.726909	0.78992	-0.340221	insig
MW0055952	PA(20:2(11Z,14Z)/14:1(9Z))	GP	PA	C37H67O8P	3	0.5328	-	21825.6	15903.4	20612.1	30299.6	7193.71	23408	0.172218	0.9139	0.945035	0.95796	-0.0619634	insig
MW0104287	1-Nitro-5-hydroxy-6-glutathionyl-5,6-dihydronaphthalene	Organic acids	Organic acids	C20H24N4O9S	3	0.5322	-	5399.46	5610.54	4738.38	3117.13	172.62	181.95	1.10377	0.0448472	0.124192	4.53622	2.18149	up
MW0135499	6-[3,7-dihydroxy-2-(4-hydroxy-3-methoxyphenyl)-3,4-dihydro-2H-1-benzopyran-4-yl]-2-(3,4-dihydroxyphenyl)-8-[2-(3,4-dihydroxyphenyl)-3,7-dihydroxy-3,4-dihydro-2H-1-benzopyran-4-yl]-3,4-dihydro-2H-1-benzopyran-3,5,7-triol	Benzene and substituted derivatives	Benzene and substituted derivatives	C46H40O16	3	0.5312	-	364.46	3173.6	4120.82	1649.46	8502.56	184.26	0.106228	0.772673	0.842431	0.740971	-0.432512	insig
MW0135989	6-{[4,5-dihydroxy-6-({7-oxo-7H-furo[3,2-g]chromen-9-yl}oxy)oxan-3-yl]oxy}-3,4,5-trihydroxyoxane-2-carboxylic acid	Organic acids	Organic acids	C22H22O14	3	0.5259	-	2276.72	9405.12	6182.99	156.6	538.8	137.46	1.31158	0.109801	0.238791	21.45	4.4229	up
MW0055554	PA(14:0/20:4(5Z,8Z,11Z,14Z))	GP	PA	C37H65O8P	3	0.5189	-	4249.36	4944.52	7511.32	15073.5	17509.4	1795.28	0.332628	0.350651	0.515418	0.485925	-1.04119	insig
MW0006803	Didox	Benzene and substituted derivatives	Benzene and substituted derivatives	C7H7NO4	3	0.5179	-	649.3	825.56	1180.09	1369.4	638.86	349.31	0.378964	0.790461	0.855378	1.12614	0.171384	insig
MW0138907	5,7-dihydroxy-2-(4-hydroxy-3-methoxyphenyl)-6-[(2R,3S,4S,6S)-4-hydroxy-6-methyl-5-oxo-3-[(2S,3R,4R,5R,6S)-3,4,5-trihydroxy-6-methyloxan-2-yl]oxyoxan-2-yl]chromen-4-one	Flavonoids	Flavones	C28H30O14	3	0.5161	-	4477.56	6110.47	2960.8	12288.2	10015.8	12483.4	1.2822	0.00445788	0.0264326	0.389476	-1.3604	down
MW0110116	Trp-His	Amino acids and derivatives	Amino acids and derivatives	C17H19N5O3	3	0.5094	-	3413.79	288.57	3588.33	260.2	272.65	642.88	0.893126	0.196164	0.354201	6.20099	2.6325	insig
MEDL01869	Methylgingerol	Phenolic acids	Phenolic acids	C18H28O4	3	0.5753	61914-52-1	598.74	2055.2	509.71	646.68	638.88	938.08	0.243309	0.597958	0.71225	1.42273	0.508667	insig
MEDL00404	2-Palmitoyl-rac-glycerol	GL	DG	C19H38O4	2	0.9302	-	130172	87886.6	116638	460834	307290	449949	1.35746	0.0216882	0.0754084	0.274775	-1.86368	down
MW0137198	8-hydroxy-2-phenyl-1lambdachromen-1-ylium	Flavonoids	Flavones	C15H11O2	3	0.7127	-	16194.2	8631.69	7070.33	17261.3	17518	19388	1.07192	0.111881	0.242307	0.588847	-0.764036	insig
MW0136928	7-{4-[(6-carboxy-3,4,5-trihydroxyoxan-2-yl)oxy]-3,5-dimethoxyphenyl}-6,11-dihydroxy-3-(4-hydroxyphenyl)-2lambda8-dioxatricyclo[7.3.1.0,(1)(3)]trideca-1(13),2,4,6,9,11-hexaen-2-ylium	Flavonoids	Flavonoid	C31H27O14	3	0.5119	-	66.68	2755.86	25.12	14.19	3636.01	2187.85	0.318868	0.512956	0.648169	0.487776	-1.03571	insig
MW0139773	Syringetin-3-o-glucoside	Flavonoids	Flavonols	C23H24O13	2	0.9502	40039-49-4	22756.9	125.24	32844.3	24936.2	412.59	369.53	0.320519	0.475127	0.617564	2.1668	1.11556	insig
MW0137617	Catechol, pentaacetate, (+)-	Flavonoids	Flavones	C25H24O11	2	0.934	84282-42-8 | 16198-01-9 | 20194-41-6	128	24154.9	14401.3	49450.6	51007.9	56536.8	0.882649	0.0220792	0.0760234	0.246404	-2.0209	insig
MW0015867	Arachidonoyl-N,N-dimethyl amide	FA	Others	C22H37NO	2	0.9324	45280-17-9	1836.06	10287.9	14113.4	19653.1	22280.3	23607.8	0.972787	0.0575091	0.14883	0.400318	-1.32078	insig
MEDN1428	5Z,8Z,11Z,14Z-Eicosatetraenedioic acid	Lipids	Free fatty acids	C20H30O4	2	0.9306	79551-84-1	1073.32	1568.65	4810.19	899.42	772.89	3842.75	0.369411	0.697466	0.788798	1.35124	0.434282	insig
MW0124765	Marrubiin	Others	Lactones	C20H28O4	2	0.9223	465-92-9	8786.02	748.52	5224.31	362.55	5829.02	8193.67	0.130386	0.971567	0.981794	1.02597	0.036991	insig
MW0110760	2S-Amino-4E-pentadecene-1,3R-diol	Alcohol and amines	Alcohols	C15H31NO2	2	0.9185	86555-28-4	344292	347066	327100	176973	145123	135809	1.37832	0.000986344	0.0104433	2.22417	1.15327	up
MW0063496	Secologanin	Terpenoids	Monoterpenoids	C17H24O10	2	0.9173	19351-63-4	13704.7	12329.7	15738.5	9272.97	9818.7	11107	1.23358	0.0398211	0.114931	1.38327	0.468084	insig
MW0138966	Milldurone	Others	Ketone compounds	C19H16O7	2	0.9146	24195-15-1	14018.7	14394.4	13333.1	4180.24	5505.33	1433.36	1.22688	0.00980273	0.0438189	3.75451	1.90863	up
MW0124614	Kahweol	Heterocyclic compounds	Heterocyclic compounds	C20H26O3	2	0.9083	6894-43-5	311.05	208.06	282.23	186.63	1441.11	79.58	0.04248	0.561302	0.682912	0.469355	-1.09125	insig
MW0143978	7-Keto-dehydroepiandrosterone	Others	Ketone compounds	C19H26O3	2	0.9023	566-19-8	142.78	18600	36.18	2128.12	905.78	1350.57	0.389189	0.51832	0.65288	4.28307	2.09865	insig
MW0012936	1-Oleoyl-2-acetyl-sn-glycerol	GL	DG	C23H42O5	2	0.9006	86390-77-4 | 92282-11-6	13370.9	3654.37	9868.24	6691.09	10581.4	5305.47	0.131823	0.686909	0.780833	1.19114	0.252345	insig
MW0012592	17R-hydroxy-4Z,7Z,10Z,13Z,15E,19Z-docosahexaenoic acid	Lipids	Free fatty acids	C22H32O3	2	0.9001	155976-53-7	98.04	178.01	1868.99	15950.2	24422	21956.5	1.28875	0.0120568	0.0504809	0.0344149	-4.86082	down
Lmhp001461	Pro-leu	Amino acids and derivatives	Amino acids and derivatives	C11H20N2O3	2	0.8968	52899-07-7	459403	280779	217545	258086	284529	136172	0.667171	0.348947	0.51446	1.41094	0.496654	insig
MW0005288	4-Nitroso-N-phenylaniline	Benzene and substituted derivatives	Benzene and substituted derivatives	C12H10N2O	2	0.8922	156-10-5	540.13	57.8	177.13	247.26	134.44	486.08	0.328933	0.871617	0.912821	0.893153	-0.163021	insig
MW0014589	(+/-)5,6-EET Methyl Ester	Lipids	Free fatty acids	C21H34O3	2	0.8921	122799-12-6	418692	149953	457733	490058	345946	1.22656e+06	0.753078	0.33368	0.50108	0.497622	-1.00688	insig
MW0052783	Eurycomalactone	Others	Ketone compounds	C19H24O6	2	0.8921	23062-24-0	762.29	739.95	1034.04	154.87	27.69	1234.39	0.814997	0.434462	0.585113	1.78996	0.839925	insig
MW0154727	Oleic Acid-2,6-diisopropylanilide	Benzene and substituted derivatives	Benzene and substituted derivatives	C30H51NO	2	0.8906	140112-65-8	100607	87105.4	110515	227371	158607	1658.76	0.394107	0.699741	0.789853	0.769347	-0.378294	insig
MW0000423	Anaprel	Alkaloids	Alkaloids	C35H42N2O9	2	0.8889	24815-24-5	1270.3	1623.71	821.4	2985.13	5492.15	9013.18	1.25469	0.117103	0.249293	0.212425	-2.23497	down
MW0108782	N-Formyl-Met-Leu-Phe	Amino acids and derivatives	Amino acids and derivatives	C21H31N3O5S	2	0.8857	59880-97-6	18395	1064.96	12101.4	3097.33	4956.2	2848.15	0.417945	0.30624	0.474893	2.89509	1.53361	insig
MW0012822	Azelaoyl PAF	GP	PA	C33H66NO9P	2	0.8789	354583-69-0	16684.7	23587.3	28125.9	97348.8	98299.4	5569.63	0.368595	0.28599	0.453636	0.33992	-1.55673	insig
MW0114516	Gentiobiose	Others	Saccharides	C12H22O11	2	0.8789	5996-00-9	858265	948547	737798	1.1773e+06	1.31753e+06	1.22569e+06	1.29812	0.00860758	0.0407102	0.68394	-0.548057	insig
MW0001514	Red Violet 2RN Acid Anthraquinone	Benzene and substituted derivatives	Benzene and substituted derivatives	C21H13NO4	2	0.8776	81-79-8	12978.1	13885.5	18833.2	16008.7	12086.9	20006.8	0.16504	0.798001	0.860535	0.949992	-0.0740123	insig
MW0015643	Alloxanthin	Alcohol and amines	Alcohols	C40H52O2	2	0.8743	28380-31-6	333.05	1235.04	1137.1	291.86	545.9	227.56	0.916098	0.187765	0.344592	2.53932	1.34444	insig
MW0056744	Palmitoyl 3-carbacyclic Phosphatidic Acid	Lipids	Free fatty acids	C20H39O5P	2	0.8731	476310-22-2	1072.43	2532.15	39.05	1007.63	2475.5	1403.12	0.575842	0.655081	0.756599	0.74569	-0.423351	insig
MW0139901	7-Hydroxycoumarinyl Arachidonate	Others	Others	C29H36O4	2	0.8727	161180-11-6	787.79	113.87	417.43	3230.92	2693.11	3199.28	1.24877	0.000608888	0.00807577	0.144585	-2.79001	down
MW0110215	Tyrosyl-prolyl-arginine	Amino acids and derivatives	Amino acids and derivatives	C20H30N6O5	2	0.8669	117186-48-8	303.51	29.85	426.17	811.61	688.31	371.93	0.855202	0.1033	0.227848	0.405764	-1.30129	insig
MW0139445	Psoromic acid	Organic acids	Organic acids	C18H14O8	2	0.8652	7299-11-8	1153.87	18.41	44.33	1508.92	1170.87	2710.2	1.04501	0.0838778	0.19515	0.225717	-2.14742	down
MEDP1068	1,2-Dioctanoyl-sn-glycero-3-phosphocholine	GP	PC	C24H48NO8P	2	0.8651	19191-91-4	1660.2	1547.39	3915.79	7806.34	6075.43	7773.71	1.25015	0.0089703	0.0414774	0.328941	-1.6041	down
MW0110317	Tyrosyl-Valine	Amino acids and derivatives	Amino acids and derivatives	C14H20N2O4	2	0.865	17355-09-8	14696.5	11984.9	10130.8	35559	21510.9	29241.6	1.29264	0.0445557	0.12364	0.426505	-1.22937	down
MW0124445	Irisxanthone	Flavonoids	Other Flavonoids	C20H20O11	2	0.864	51419-56-8	172.31	24.91	281.15	115.82	15.81	47.51	0.594599	0.311945	0.478966	2.67037	1.41704	insig
MW0139651	Santin	Flavonoids	Flavones	C18H16O7	2	0.8638	27782-63-4	23.56	31.42	475.57	154.26	320.07	719.32	0.827477	0.381417	0.544068	0.444477	-1.16982	insig
MW0053624	Ginsenoside Rg3	Terpenoids	Triterpene Saponin	C42H72O13	2	0.8632	14197-60-5 | 11019-45-7	13602.2	11633	11282.6	240.85	84.81	286.52	1.38373	0.0034264	0.0223051	59.6521	5.8985	up
MW0014614	5S-HpEPE	Lipids	Free fatty acids	C20H30O4	2	0.8631	143292-98-2	60653.5	30467.7	43131.9	163627	158701	129168	1.33208	0.00186837	0.0152805	0.297351	-1.74976	down
MW0150783	1-O-Hexadecyl-2-acetyl-sn-glycerol	GL	DG	C21H42O4	2	0.8585	77133-35-8	352809	170798	194208	139997	125362	20932.6	0.928627	0.114151	0.24534	2.50728	1.32612	insig
MW0055263	Neoabietic acid	Terpenoids	Ditepenoids	C20H30O2	2	0.8583	471-77-2	2.34768e+06	4.1699e+06	4.30748e+06	6.28121e+06	6.3113e+06	6.5616e+06	1.17818	0.045617	0.125604	0.565156	-0.823279	insig
MW0158729	Tyrosyl-tryptophan	Amino acids and derivatives	Amino acids and derivatives	C20H21N3O4	2	0.8461	60815-41-0	199.28	529.58	312.78	6365.47	4365.63	4587.49	1.37326	0.0155043	0.0605186	0.0679984	-3.87835	down
MW0141380	13E-Docosenamide	FA	Others	C22H43NO	2	0.8431	3061-72-1	7.00212e+06	4.59308e+06	5.59308e+06	6.02953e+06	6.41255e+06	1.80627e+06	0.483177	0.592686	0.707619	1.20633	0.270629	insig
MW0137583	Capillarisin	Others	Chromone	C16H12O7	2	0.8422	56365-38-9	59.87	6171.02	65.01	167.51	1704.51	2279.01	0.422585	0.764623	0.838672	1.51671	0.600943	insig
MW0126958	Vulpinic acid	Organic acids	Organic acids	C19H14O5	2	0.842	521-52-8 | 73622-57-8	35081.8	35251.7	33305.3	28134	25129.4	21922.2	1.27895	0.0240291	0.0806033	1.37844	0.463036	insig
MW0109363	Prolylglutamic acid	Amino acids and derivatives	Amino acids and derivatives	C10H16N2O5	2	0.8387	67644-00-2	151.1	271.28	299.74	510.61	497.64	496.12	1.23178	0.0281471	0.0904463	0.480015	-1.05885	down
MW0143974	7-Hydroxycoumarinyl-gamma-linolenate	Lipids	Free fatty acids	C27H34O4	2	0.8364	161180-12-7	37366.4	30010.8	27143.7	26644.4	14201.6	22031.2	1.00985	0.092086	0.20965	1.50326	0.588097	insig
MW0148485	Isorescinnamine, dihydro-	Alkaloids	Alkaloids	C35H44N2O9	2	0.8363	6335-49-5	168476	91941.7	192647	119735	145351	158209	0.0782366	0.78264	0.849339	1.07033	0.0980549	insig
MW0015475	9-Octadecynoic acid	Lipids	Free fatty acids	C18H32O2	2	0.8351	506-24-1	122053	129172	115294	313618	247133	321938	1.37778	0.0162462	0.0623462	0.415231	-1.26801	down
MW0108426	N-(3-Indolylacetyl)-L-isoleucine	Amino acids and derivatives	Amino acids and derivatives	C16H20N2O3	2	0.8223	57105-45-0	145.6	68.13	211.23	12994.4	18401.4	18409.6	1.39209	0.0117628	0.0498225	0.00853241	-6.87283	down
MW0061828	Pinolenic Acid ethyl ester	FA	Others	C20H34O2	2	0.8157	493015-74-0	139299	160848	98017.2	210074	155941	201735	1.02105	0.0867701	0.200606	0.701303	-0.511891	insig
MW0055282	Neotigogenin acetate	Steroids	Steroid	C29H46O4	2	0.8065	4948-43-0	315579	255447	200154	3.3977e+06	3.82407e+06	2.97157e+06	1.39749	0.00539545	0.0299517	0.0756553	-3.72441	down
MW0009992	Triphenylphosphine oxide	Benzene and substituted derivatives	Benzene and substituted derivatives	C18H15OP	2	0.8048	791-28-6	49274.4	48037.7	47591.8	41418.9	29607	37426.3	1.16898	0.0698495	0.171206	1.33611	0.418037	insig
MW0015499	9-Thiastearic Acid	Lipids	Free fatty acids	C17H34O2S	2	0.8044	106689-24-1	246371	227955	421034	514112	477181	394302	1.05228	0.0994369	0.221264	0.646192	-0.629966	insig
MW0137752	Coumestrol dimethyl ether	Heterocyclic compounds	Heterocyclic compounds	C17H12O5	2	0.8011	3172-99-4	13.32	9.43	15.01	10.11	1.7	369.52	0.177359	0.444541	0.591129	0.0990218	-3.33611	insig
MW0004136	3-methyl-N-naphthalen-2-ylbutanamide	Benzene and substituted derivatives	Benzene and substituted derivatives	C15H17NO	2	0.7961	6286-27-7	52266.1	50952.5	47638	7214.34	5186.43	428.26	1.2077	0.000111716	0.00305319	11.759	3.55569	up
MW0113884	Aloeresin A	Flavonoids	Other Flavonoids	C28H28O11	2	0.7959	74545-79-2	37.79	688.38	493.9	4072.23	605.7	3008.69	0.980178	0.166321	0.317445	0.158726	-2.65539	insig
MW0004284	4-(3-Hydroxybutyl)phenol	Phenolic acids	Phenolic acids	C10H14O2	2	0.7947	69617-84-1	1763.54	7103.86	1805.82	6111.17	5909.34	4373.42	0.795073	0.397163	0.557189	0.651047	-0.619166	insig
MW0015797	Anisatin	Heterocyclic compounds	Heterocyclic compounds	C15H20O8	2	0.7935	5230-87-5	52284.2	16040.5	50007.5	46896.9	52118.1	42602.6	0.508841	0.579383	0.696504	0.835575	-0.259159	insig
MW0011974	10S,17S-dihydroxy-4Z,7Z,11E,13Z,15E,19Z-docosahexaenoic acid	Lipids	Free fatty acids	C22H32O4	2	0.7872	871826-47-0	11367	316.27	325.67	699.36	3037.12	199.55	0.165316	0.544208	0.671845	3.05102	1.60929	insig
MEDP2160	Oroxylin A	Flavonoids	Flavones	C16H12O5	2	0.7869	480-11-5	945.4	400.92	43693.8	1697.49	663.36	14726.4	0.000289837	0.589384	0.704557	2.63589	1.39829	insig
MW0114164	D-(+)-Turanose	Others	Saccharides	C12H22O11	2	0.7866	547-25-1	2.14074e+06	2.06212e+06	2.27385e+06	4.29167e+06	3.63092e+06	3.43267e+06	1.36155	0.0199173	0.0711308	0.570371	-0.810026	insig
MW0055246	Napelline	Alkaloids	Terpenoid alkaloids	C22H33NO3	2	0.7865	5008-52-6	4661.21	1932.91	2020.51	99728.4	1268.5	141129	0.840598	0.201343	0.360006	0.0355791	-4.81282	insig
MW0168991	CYMARIN	Steroids	Cardiac glycoside	C30H44O9	2	0.7824	508-77-0	782.88	1038.75	479.91	1183.64	687.61	656.41	0.247565	0.764571	0.838672	0.910542	-0.135203	insig
MW0169507	N-1-Naphthylbenzamide	Benzene and substituted derivatives	Benzene and substituted derivatives	C17H13NO	2	0.7817	634-42-4	1633.58	3274.46	1513.52	2302.69	641.29	1315.9	0.663177	0.38969	0.550535	1.50745	0.592111	insig
MW0053734	Glycerophospho-N-Palmitoyl Ethanolamine	GP	PE	C21H44NO7P	2	0.7817	100575-09-5	662099	572470	728021	2.69015e+06	2.68029e+06	2.48688e+06	1.39886	4.54168e-05	0.00194168	0.249779	-2.00128	down
MEDP2114	2-Amino-5-methyl-4-phenylthiazole	Benzene and substituted derivatives	Benzene and substituted derivatives	C10H10N2S	2	0.7798	30709-67-2	116.84	422.25	204.74	176.24	289.81	413.18	0.371525	0.713051	0.798617	0.846002	-0.241268	insig
MEDN1401	5-Phenylpenta-2,4-dienoic acid	Organic acids	Organic acids	C11H10O2	2	0.7783	1552-94-9 | 28010-12-0 | 185152-35-6 | 38446-98-9	1052.9	2122.78	6626.92	952.73	1716.65	957.66	0.772633	0.351026	0.515418	2.70264	1.43437	insig
MW0052336	Diethyl fumarate	Others	Lactones	C8H12O4	2	0.7776	623-91-6 | 26298-06-6	61396.9	60673.8	60580.4	112161	103712	114752	1.39926	0.00434497	0.0259925	0.552442	-0.856105	insig
MW0112865	Isovalerophenone	Others	Ketone compounds	C11H14O	2	0.7763	582-62-7	278.45	957.97	1557.62	33.6	368.52	236.13	0.954889	0.185118	0.34082	4.37766	2.13016	insig
MW0048964	Cnicine	Others	Lactones	C20H26O7	2	0.776	24394-09-0	247441	449491	441858	547375	1.52052e+06	478410	0.904872	0.296447	0.464201	0.447233	-1.1609	insig
MW0110612	15(S)-HETE Ethanolamide	Alcohol and amines	Amines	C22H37NO3	2	0.7758	161744-53-2	2148.57	1494.78	1093.58	134916	127162	131163	1.40145	0.000235793	0.00472995	0.0120459	-6.37532	down
MW0107882	D-homoserine lactone	Others	Ketone compounds	C4H7NO2	2	0.7749	51744-82-2	376.4	219.54	454.25	441.81	500.1	663.29	0.947637	0.125462	0.261023	0.654242	-0.612103	insig
MW0052505	Ecdysone	Organic acids	Organic acids	C27H44O6	2	0.7746	3604-87-3	16108.7	15407.2	7989.48	12188.5	12444.2	18668.3	0.306415	0.725729	0.808943	0.912341	-0.132355	insig
MW0169069	6H-Indolo(2,3-a)quinolizin-5-ium, 3-ethyl-7,12-dihydro-	Heterocyclic compounds	Heterocyclic compounds	C17H17N2+	2	0.7743	55371-52-3 | 50651-13-3	191.39	330.73	1625.65	52740.4	12759.9	53882.5	1.31707	0.101601	0.225333	0.0179906	-5.79661	down
MW0127754	(+)-Medicarpin	Flavonoids	Other Flavonoids	C16H14O4	2	0.7742	33983-39-0 | 33983-40-3	10424.2	4930.81	6798.15	6371.88	3013.66	2243.15	0.951424	0.166359	0.317445	1.90504	0.929823	insig
MW0116019	3,4-Methylenedioxycinnamaldehyde	Others	Aldehyde compounds	C10H8O3	2	0.7741	14756-00-4 | 58095-77-5	497704	495915	506718	855303	838083	792554	1.40073	0.00252396	0.0185951	0.60353	-0.728504	insig
MW0126851	3-(3-methylbut-2-en-1-yl)-3H-purin-6-amine	Heterocyclic compounds	Heterocyclic compounds	C10H13N5	2	0.7735	10091-84-6	14665.4	14589.2	14254.1	32363.9	33252.1	27811	1.39179	0.00978982	0.0438097	0.465698	-1.10253	down
MW0127814	Isovitexin 2''-O-arabinoside	Alcohol and amines	Alcohols	C26H28O14	2	0.7731	53382-71-1	8186.15	9240.1	10936.6	14035.2	11956.2	14455.6	1.22089	0.022428	0.0766354	0.701233	-0.512034	insig
MW0127419	Butylate	Others	Lactones	C11H23NOS	2	0.7716	2008-41-5	2695.75	1866.39	3266.8	7294.07	4452.39	4672.69	1.19992	0.0708458	0.172656	0.476818	-1.06849	down
MW0111641	ISOPEONOL	Others	Ketone compounds	C9H10O3	2	0.7713	493-33-4	9192.3	3006.88	10623.4	7827.3	2551.6	7328.34	0.294933	0.58858	0.7042	1.28888	0.366122	insig
MW0153757	Met-Glu	Amino acids and derivatives	Amino acids and derivatives	C10H18N2O5S	2	0.771	14517-44-3	729.61	5777.52	2710.52	1177.36	7972.9	7691.18	0.464542	0.401348	0.561086	0.54732	-0.869545	insig
MW0010652	Saucernetin	Lignans and Coumarins	Lignans	C22H28O5	2	0.771	83377-13-3	50.64	41.44	122.39	36.52	132.52	63.26	0.0808214	0.884521	0.923218	0.923246	-0.115213	insig
MW0113988	beta-D-Galp-(1->3)-D-GalpNAc	Others	Saccharides	C14H25NO11	2	0.7708	20972-29-6	1.54442e+06	1.5524e+06	1.56259e+06	1.70088e+06	1.67178e+06	1.70435e+06	1.38853	0.00129792	0.0121717	0.917746	-0.123833	insig
MW0006718	N-(3-nitrophenyl)decanamide	Benzene and substituted derivatives	Benzene and substituted derivatives	C16H24N2O3	2	0.7707	72298-61-4	32.81	61.53	432.25	151.73	119.85	41600.6	0.673582	0.423759	0.576255	0.0125761	-6.31317	insig
MW0010749	(+)-7-iso-Jasmonic acid	Organic acids	Organic acids	C12H18O3	2	0.7701	62653-85-4	3261.09	3016.43	2298.21	32.29	87.39	852.08	1.18621	0.00301956	0.0206005	8.82495	3.14159	up
MW0155444	Phe-Gly-Gly	Amino acids and derivatives	Amino acids and derivatives	C13H17N3O4	2	0.7696	23576-42-3	2208.16	591.55	1286.96	2809.51	1817.82	2448.14	0.898796	0.158751	0.308056	0.577583	-0.7919	insig
MW0107917	L-Name	Others	Lactones	C7H15N5O4	2	0.7687	50903-99-6	260.06	152.43	259.12	43.94	146.45	160.01	0.910076	0.104591	0.230444	1.9167	0.938621	insig
MW0105581	Alitame	Organic acids	Organic acids	C14H25N3O4S	2	0.7683	80863-62-3	2107.49	818.02	533.08	10705.7	4639.22	111.52	0.283969	0.321657	0.489368	0.223764	-2.15995	insig
MW0107090	Glycyl-L-prolyl-L-lysine	Amino acids and derivatives	Amino acids and derivatives	C13H24N4O4	2	0.7674	52766-29-7	872.8	1107.45	922.05	428.03	879.01	4239.83	0.196833	0.539968	0.668864	0.523232	-0.934477	insig
MW0013392	2-Aminohexadecanoic acid	Organic acids	Organic acids	C16H33NO2	2	0.7673	7769-79-1	12172.4	10746	12339	13676.5	16058.7	16664.8	1.23244	0.0353995	0.105648	0.759861	-0.396192	insig
MW0168670	9,12-Octadecadiynoic Acid	Lipids	Free fatty acids	C18H28O2	2	0.7655	2012-14-8	3592.94	1687.62	5909.29	5706	3095.37	5431.49	0.519321	0.534289	0.66592	0.786198	-0.347035	insig
MW0002106	2,3',4,6-Tetrahydroxybenzophenone	Flavonoids	Other Flavonoids	C13H10O5	2	0.7642	26271-33-0	2715.57	401.14	402.85	1527.59	1504.91	678.62	0.412685	0.943713	0.966484	0.948382	-0.0764596	insig
MW0006798	Dicyclohexyl phthalate	Benzene and substituted derivatives	Benzene and substituted derivatives	C20H26O4	2	0.7635	84-61-7	100.71	797.34	957.18	48.3	1352.35	646.72	0.114709	0.896648	0.932947	0.906153	-0.142174	insig
MW0008806	N(4)-Acetylsulfadiazine	Benzene and substituted derivatives	Benzene and substituted derivatives	C12H12N4O3S	2	0.7628	127-74-2 | 5572-57-6	44728.5	261.22	46631.6	50578.7	45740.5	46610.8	0.641431	0.376071	0.53903	0.641022	-0.641553	insig
MW0154159	N-3-oxo-hexadec-11(Z)-enoyl-L-Homoserine lactone	Amino acids and derivatives	Amino acids and derivatives	C20H33NO4	2	0.7625	1269663-80-0	1310.87	3871.45	2632.74	12015.7	15606.6	17942.8	1.32028	0.00921845	0.0420375	0.171514	-2.5436	down
MW0113885	Aloesin	Others	Chromone	C19H22O9	2	0.7623	30861-27-9	1577.05	844.93	1332.8	431.77	498.71	479.91	1.30449	0.06698	0.166526	2.66223	1.41263	up
MW0011871	1,2-Dihexanoyl-sn-glycerol	GL	DG	C15H28O5	2	0.7614	30403-47-5	50261.7	118182	141571	561562	551368	584891	1.32455	0.00137264	0.0125784	0.182596	-2.45327	down
MW0053897	(Z)-Hexadec-9-en-1-ol	Organic acids	Organic acids	C16H32O	2	0.7613	10378-01-5	195324	197160	207369	2926.06	2281.53	2774.63	1.40583	0.000348784	0.00597772	75.1487	6.23168	up
MADN0517	Thioisonicotinamide	Others	Others	C6H6N2S	2	0.761	2196-13-6	678804	695894	726181	704556	705256	687318	0.0482519	0.939578	0.963036	1.00179	0.00257656	insig
MW0006920	DMABA NHS Ester	Benzene and substituted derivatives	Benzene and substituted derivatives	C13H14N2O4	2	0.7604	58068-85-2	13850.8	11475.7	16461.2	24504.4	24771.2	21717.2	1.29857	0.00726404	0.0362035	0.588618	-0.764596	insig
MW0126929	Ursinoic acid	Benzene and substituted derivatives	Benzene and substituted derivatives	C15H16O5	2	0.7595	30265-59-9	160262	153596	166820	217188	221409	218328	1.38977	0.0019869	0.0160867	0.731708	-0.45066	insig
MW0169896	TAXININE M	Others	Others	C35H44O14	2	0.7592	135730-55-1	176750	149697	177649	280308	286482	301940	1.37362	0.000720744	0.00900462	0.580268	-0.785209	insig
MW0138437	Ichthynone	Others	Ketone compounds	C23H20O7	2	0.7581	24340-62-3	341.82	49.86	442.21	2895.96	213.19	667.5	0.770168	0.358062	0.523082	0.220802	-2.17918	insig
MW0111217	N-Methyldioctylamine	Alcohol and amines	Amines	C17H37N	2	0.7581	4455-26-9	143214	168075	104950	107989	58833.1	103609	0.959998	0.116272	0.248442	1.53916	0.622147	insig
MW0125062	Methyl pyrimidine-2-carboxylate	Others	Lactones	C6H6N2O2	2	0.758	34253-03-7	10052	7000.69	17846.7	41198.5	29385.5	15034	1.04477	0.141934	0.285569	0.407618	-1.29471	down
pme0321	Kaempferol-7-rhamnoside	Flavonoids	Flavonols	C21H20O10	2	0.7575	20196-89-8	29088.6	3834.52	19750.8	14745.9	1046.08	2951.61	0.76825	0.271113	0.439986	2.81023	1.49069	insig
MW0055499	Ophiopogonin D	Steroids	Steroidal saponins	C44H70O16	2	0.7564	945619-74-9 | 125150-67-6	172.94	88.91	57.64	183.69	245.31	376.66	1.11145	0.0852155	0.197692	0.396557	-1.3344	down
MW0115745	Cannabichromene	Others	Others	C21H30O2	2	0.7559	20675-51-8 | 18793-28-7	4000.56	127.39	2511.25	4685.48	3005.56	49.98	0.0762999	0.845473	0.895325	0.857665	-0.221514	insig
MW0108412	N-(2-Oxotetrahydrofuran-3-YL)octanamide	Alcohol and amines	Amines	C12H21NO3	2	0.7556	147852-84-4	5978.54	7162.52	2551.87	84487	97165.1	106285	1.37472	0.00346557	0.0225011	0.0545012	-4.19757	down
MW0006086	Aspulvinone E	Phenolic acids	Phenolic acids	C17H12O5	2	0.755	49637-60-7	3160.92	1570.11	45.22	22.32	2127.17	1327.46	0.152665	0.713647	0.799063	1.37369	0.458056	insig
MW0054902	Methyl cis-9-tetradecenoate	FA	Others	C15H28O2	2	0.7549	56219-06-8	25221.8	177155	20744.7	262896	413.66	239891	0.131069	0.406698	0.565256	0.443403	-1.17331	insig
MW0114318	Atrinositol	Organic acids	Organic acids	C6H15O15P3	2	0.7543	28841-62-5	4121.81	637.65	4974.36	11409.1	15859.4	12950.5	1.11673	0.00546948	0.0301256	0.24202	-2.0468	down
MW0124177	Furafylline	Heterocyclic compounds	Heterocyclic compounds	C12H12N4O3	2	0.7542	80288-49-9	1009.71	85.68	3181.54	40.56	62.31	307.47	0.875448	0.294867	0.463428	10.4229	3.38168	insig
MW0057740	1,2-Dihexanoyl-sn-glycero-3-phosphocholine	GP	PC	C20H40NO8P	2	0.754	34506-67-7	95417.4	92501	99074	88690.9	88545.7	89359.5	1.23442	0.0677147	0.167913	1.07651	0.106356	insig
MW0015831	Antheraxanthin	Heterocyclic compounds	Heterocyclic compounds	C40H56O3	2	0.754	640-03-9 | 68831-78-7 | 25494-44-4	229.53	272.43	220.14	1586.49	1851.17	11497.4	1.26198	0.283373	0.451604	0.0483492	-4.37036	down
MW0117270	Pac-1	GP	PA	C23H28N4O2	2	0.7538	315183-21-2	1.54943e+06	1.51003e+06	1.60271e+06	1.10272e+06	1.04884e+06	1.0989e+06	1.39477	0.000324544	0.00566477	1.43431	0.520354	insig
MW0014651	5,8,11-Eicosatriynoic Acid	Lipids	Free fatty acids	C20H28O2	2	0.7537	13488-22-7	2749.06	2516.81	1365.73	436.33	2220.85	9999.05	0.00460739	0.565765	0.685631	0.523979	-0.932419	insig
MW0137097	7-Methoxy-4-methylcoumarin	Lignans and Coumarins	Coumarins	C11H10O3	2	0.7527	2555-28-4	421.27	352.81	269.2	1037.71	818.52	105.66	0.254203	0.390263	0.550767	0.531773	-0.911118	insig
MW0157301	Sumaresinol	Terpenoids	Triterpene	C30H48O4	2	0.7526	559-64-8	1080.95	1297.93	471.77	2410.88	5533.55	495.04	0.625207	0.331587	0.499424	0.337776	-1.56586	insig
MW0130748	2H,8H-Benzo[1,2-b:3,4-b']dipyran-2-one, 9,10-dihydro-9-hydroxy-8,8-dimethyl-, (R)-	Benzene and substituted derivatives	Benzene and substituted derivatives	C14H14O4	2	0.7516	19380-05-3	17291.7	18735.2	19321.6	11480.9	28987.7	34693.9	0.397801	0.444283	0.591009	0.736384	-0.44147	insig
MEDN1869	N-(4-nitrophenyl)decanamide	Benzene and substituted derivatives	Benzene and substituted derivatives	C16H24N2O3	2	0.7511	72298-63-6	32906.3	29552	34235.3	51752.5	50774.8	49411.2	1.37892	0.00150666	0.0133221	0.636399	-0.651996	insig
MW0006843	Diisodecyl phthalate	Benzene and substituted derivatives	Benzene and substituted derivatives	C28H46O4	2	0.7494	26761-40-0 | 89-16-7 | 68515-49-1 | 19269-67-1	50642.4	64587.4	76409.6	155050	170310	208232	1.35189	0.00859447	0.0407102	0.359149	-1.47734	down
MW0009169	N-[2-(3,4-Dihydroxyphenyl)ethyl]hexadecanamide	Lipids	Free fatty acids	C24H41NO3	2	0.749	136181-87-8	308.28	227.91	1038.69	32396.8	41339.7	41968.1	1.37705	0.00624993	0.032769	0.0136112	-6.19906	down
MW0153758	Met-Gly-Met	Amino acids and derivatives	Amino acids and derivatives	C12H23N3O4S2	2	0.7471	14486-10-3	1316.27	1123.83	458.1	1272.66	829.56	21.05	0.548151	0.599268	0.713389	1.36497	0.448869	insig
MW0141122	Dioleoylphosphatidylcholine	GP	PC	C44H84NO8P	2	0.747	52088-89-8	144.45	5703.52	5063.59	12986.9	3011.57	8494.71	0.695762	0.264779	0.433275	0.445495	-1.16652	insig
MW0137829	Cyanidin 3-arabinoside cation	Flavonoids	Anthocyanidins	C20H19O10+	2	0.7466	792868-19-0 | 324533-66-6	8873.89	134.7	14509.5	10983.8	18276.7	198.5	0.0952795	0.78336	0.849747	0.798329	-0.324944	insig
MW0012354	(+/-)14(15)-Epetre methyl ester	Lipids	Free fatty acids	C21H34O3	2	0.7461	73804-67-8 | 70219-56-6	2786.75	3729.88	6310.91	3651.22	7347.08	5034.35	0.503308	0.51758	0.652354	0.800089	-0.321768	insig
MW0008927	n-Benzylacetamidine	Benzene and substituted derivatives	Benzene and substituted derivatives	C9H12N2	2	0.7459	69981-57-3	3192.51	1149.29	2348.03	6243.05	976.43	1490.48	0.0215994	0.73481	0.815288	0.768067	-0.380697	insig
MW0014283	3-Thiatetradecanoic Acid	FA	Others	C13H26O2S	2	0.7459	116296-31-2	30150.5	36142.4	30538.5	36264.2	46677.9	35999	0.981095	0.160402	0.309149	0.814112	-0.2967	insig
MW0016350	1,3-Benzenediol, 2-[3-methyl-6-(1-methylethenyl)-2-cyclohexen-1-yl]-5-pentyl-, (1R-trans)-	Alcohol and amines	Alcohols	C21H30O2	2	0.7457	74219-29-7	4682.29	7827.55	13745.7	1607.29	5503.46	3754.85	0.968711	0.18376	0.340288	2.41639	1.27285	insig
MW0154784	O-Toluenesulfonamide	Benzene and substituted derivatives	Benzene and substituted derivatives	C7H9NO2S	2	0.7457	88-19-7 | 8013-74-9	13736	26903.5	25462.5	17389.4	31199.1	15796.3	0.0733225	0.933413	0.958615	1.02667	0.0379737	insig
MW0103150	Xanthorrhizol	Phenolic acids	Phenolic acids	C15H22O	2	0.7456	30199-26-9	13941.6	13544.5	16679.8	3194.35	3239.78	308.1	1.16122	0.000837005	0.00958752	6.55064	2.71164	up
MW0054028	Ipecoside	Others	Lactones	C27H35NO12	2	0.7422	15401-60-2	167.34	561.11	640.07	408.3	448.46	882.75	0.446487	0.589051	0.704555	0.786727	-0.346064	insig
MW0109354	Pro-Asp	Amino acids and derivatives	Amino acids and derivatives	C9H14N2O5	2	0.7418	85227-98-1	31611.5	48832.3	46074.8	37286.2	60347.4	55410.7	0.590726	0.376198	0.53903	0.826679	-0.2746	insig
MW0140017	Abscisic acid	Organic acids	Organic acids	C15H20O4	2	0.7418	14398-53-9 | 21293-29-8	1696.5	312.74	1556.9	2641.47	2120.72	77.86	0.116633	0.666986	0.766615	0.736798	-0.440659	insig
MW0063755	Taxol C	Alkaloids	Alkaloids	C46H57NO14	2	0.7411	153415-45-3	309.39	370.82	178.71	149.67	25.69	302.31	0.745178	0.271609	0.439986	1.79815	0.846509	insig
MW0000426	Rhoeadine	Alkaloids	Alkaloids	C21H21NO6	2	0.7407	2718-25-4	809.67	2830.02	776.92	1094.56	374.9	1425.26	0.422634	0.548664	0.673733	1.52575	0.609516	insig
MW0006246	Phosphine-biotin	Benzene and substituted derivatives	Benzene and substituted derivatives	C41H53N4O8PS	2	0.7402	608514-42-7	3847.79	4694.35	6048.65	15817	16482.9	25809.3	1.34803	0.0415085	0.118194	0.251093	-1.99371	down
MW0010792	(+)-trans-Chrysanthemic acid	Organic acids	Organic acids	C10H16O2	2	0.7397	4638-92-0	159.04	1066.7	265.89	701.7	693.09	97.43	0.0137753	0.999581	0.999581	0.999605	-0.000570531	insig
MW0012407	15(S)-Hede	Lipids	Free fatty acids	C20H36O3	2	0.7387	92693-04-4	38789.6	31999.6	34468.4	14007.5	7235.01	12725.4	1.32064	0.0011758	0.0115069	3.09874	1.63168	up
MW0107173	Glycyl-l-histidyl-l-lysine	Amino acids and derivatives	Amino acids and derivatives	C14H24N6O4	2	0.7386	49557-75-7	20984.3	21804.7	22594.5	5046.42	147.36	5327.62	1.04219	0.00541538	0.0299517	6.21433	2.6356	up
MW0001202	4-Methylphenylacetone	Benzene and substituted derivatives	Benzene and substituted derivatives	C10H12O	2	0.7379	2096-86-8	1608.56	6238.87	4663.61	8081.85	7105.32	6097.93	0.877662	0.152194	0.299096	0.587784	-0.766642	insig
MW0000153	Bicuculline	Alkaloids	Isoquinoline alkaloids	C20H17NO6	2	0.7373	485-49-4	110.74	478.37	184.89	911.44	794.42	132.73	0.634355	0.28135	0.449624	0.420975	-1.24819	insig
MW0169689	Pomiferin	Flavonoids	Other Flavonoids	C25H24O6	2	0.7362	572-03-2	849.39	200.92	99.84	281.23	374.79	284.7	0.206524	0.795125	0.858582	1.22263	0.289985	insig
MW0009117	Phenpromethamine	Alkaloids	Alkaloids	C10H15N	2	0.7362	93-88-9	543564	534735	594006	664406	665214	622384	1.25486	0.0182145	0.0669539	0.856712	-0.223118	insig
MW0008516	Diphenylmethylene-Glycine benzyl ester	Benzene and substituted derivatives	Benzene and substituted derivatives	C22H19NO2	2	0.7342	81477-91-0	33331.1	56451.2	35714.3	26802.3	26352	39518	0.800971	0.283145	0.45142	1.3542	0.437439	insig
MW0006902	Methyldiphenylphosphine oxide	Benzene and substituted derivatives	Benzene and substituted derivatives	C13H13OP	2	0.7338	2129-89-7	23058.1	23570.6	23236.4	14429	26499.9	25164.6	0.320973	0.773451	0.842431	1.05707	0.0800649	insig
MW0053814	Harpagoside	Terpenoids	Monoterpenoids	C24H30O11	2	0.7329	19210-12-9	1152.3	869.14	1180.82	87.61	61.4	87.05	1.39709	0.00955768	0.043154	13.5654	3.76186	up
MEDP1235	Dipropyl phthalate	Others	Lactones	C14H18O4	2	0.7304	131-16-8	5184.09	2619.19	5753.3	1664.67	3778.4	5810.93	0.388776	0.644838	0.75014	1.2046	0.268555	insig
MW0128402	(S,S)-(-)-Hydrobenzoin	Benzene and substituted derivatives	Benzene and substituted derivatives	C14H14O2	2	0.7252	2325-10-2 | 655-48-1	10775.6	18293.5	21852.2	27240.9	21482.8	23333.9	0.917558	0.151202	0.297679	0.706675	-0.500882	insig
MW0015399	Methyl alpha-eleostearate	Lipids	Free fatty acids	C19H32O2	2	0.7248	4175-47-7	8381.16	11768.6	10880.1	169.06	9344.98	195.29	1.01062	0.134784	0.276003	3.19587	1.67621	up
MW0119764	3-Pyrimidin-2-yl-2-pyrimidin-2-ylmethyl-propionic acid	Organic acids	Organic acids	C12H12N4O2	2	0.7225	936643-76-4	299.65	1167.05	293.56	56.04	2396	2714.4	0.214935	0.307394	0.475599	0.34071	-1.55338	insig
MW0011852	1,2-Didecanoyl-sn-glycero-3-phosphocholine	GP	PC	C28H56NO8P	2	0.7211	3436-44-0	291.4	619.32	1093.6	78.09	53.64	836.05	0.818273	0.375838	0.538955	2.07105	1.05036	insig
MW0133704	4'-Methoxyflavanone	Flavonoids	Flavones	C16H14O3	2	0.7189	3034-08-0 | 97005-76-0	101.17	45.62	75.41	21458.3	113.55	192.99	0.819418	0.418383	0.57412	0.0102091	-6.614	insig
MW0110250	Tyr-glu	Amino acids and derivatives	Amino acids and derivatives	C14H18N2O6	2	0.7176	2545-89-3	207945	210090	223174	31298.9	30542	42014.8	1.39777	1.29958e-05	0.00106937	6.17404	2.62621	up
MW0056741	Palmitoleoyl 3-carbacyclic Phosphatidic Acid	Lipids	Free fatty acids	C20H37O5P	2	0.7164	910228-13-6	168472	138546	157078	268756	241468	298386	1.34691	0.00820869	0.0394017	0.573943	-0.801021	insig
MW0108024	Lys-Trp-Lys	Amino acids and derivatives	Amino acids and derivatives	C23H36N6O4	2	0.7149	38579-27-0	7270.75	8672.04	8186.64	33471.6	65658.2	33912.4	1.35592	0.0761962	0.18136	0.181367	-2.46302	down
MW0053496	Geranylgeraniol	Alcohol and amines	Alcohols	C20H34O	2	0.7133	24034-73-9 | 7614-21-3	704916	799936	1.19602e+06	1.50627e+06	1.41136e+06	1.46446e+06	1.19035	0.0607408	0.154515	0.616343	-0.698195	insig
MW0009489	Plumbagin	Quinones	Quinones	C11H8O3	2	0.7132	481-42-5	33900.9	42861	35365.8	46050.8	28976.5	43927.5	0.187404	0.731731	0.813438	0.942607	-0.0852718	insig
MW0138164	Fisetinidol	Flavonoids	Flavanonols	C15H14O5	2	0.7118	490-49-3	3229.09	3569.31	22.53	6654.16	1224.72	6629.52	0.633921	0.306879	0.475157	0.470137	-1.08885	insig
MW0140518	(E) 9-octadecen-1-ol	Others	Others	C18H36O	2	0.7085	506-42-3	194708	189679	194056	63568.7	54667.3	59727.7	1.40267	1.03987e-05	0.000952896	3.25034	1.70059	up
MW0169561	N-nonanoyl-L-Homoserine lactone	Others	Lactones	C13H23NO3	2	0.7081	177158-21-3	46.18	35.29	19.62	110.37	21.68	3.72	0.288329	0.76244	0.837418	0.744568	-0.425524	insig
MW0007557	M-Tolyl acetate	Others	Lactones	C9H10O2	2	0.7054	122-46-3	170235	175231	36191.1	154707	156361	177920	0.567583	0.515661	0.650546	0.780502	-0.357525	insig
MW0112714	3,5,5-Trimethylcyclohexane-1,2-dione	Others	Ketone compounds	C9H14O2	2	0.7024	57696-89-6	263.15	344.49	319.42	12367.5	61.38	49392.6	0.711138	0.304415	0.472441	0.0149957	-6.0593	insig
MW0119160	3',4'-(Methylenedioxy)acetophenone	Others	Ketone compounds	C9H8O3	2	0.702	3162-29-6	8265.6	7317.77	11654.5	10374.2	10756.6	14122	0.870603	0.207426	0.366655	0.772644	-0.372124	insig
MW0137107	7-Methoxyflavanone	Others	Ketone compounds	C16H14O3	2	0.7014	21785-09-1	238.85	69.05	109.85	114.29	209.49	23.54	0.354551	0.76746	0.840241	1.20278	0.266374	insig
MW0011652	4-Isopropenylcyclohexene-1-carboxylic acid	Organic acids	Organic acids	C10H14O2	2	0.7012	23635-14-5	22583.8	17694	18481.6	25333.6	20791.1	26136.6	0.995387	0.116816	0.249207	0.813152	-0.298403	insig
MW0138679	Kaempferol-3-Rhamnoside-4''-Rhamnoside-7-Rhamnoside	Flavonoids	Flavones	C33H40O18	2	0.7007	129369-23-9	663.06	2738.15	1828.23	19017.3	17488.3	19201.4	1.33351	3.42524e-05	0.00176161	0.0938741	-3.41313	down
MW0128017	Catechin tetramethylether	Benzene and substituted derivatives	Benzene and substituted derivatives	C19H22O6	2	0.7007	51079-25-5	28790.5	18082.4	20728.2	25727	17314.7	29940.1	0.230007	0.733927	0.81498	0.926274	-0.11049	insig
MW0062288	methyl 5'-oxo-1-[3,4,5-trihydroxy-6-(hydroxymethyl)oxan-2-yl]oxy-4'-[1-[3-[4-[3,4,5-trihydroxy-6-(hydroxymethyl)oxan-2-yl]oxyphenyl]prop-2-enoyloxy]ethyl]spiro[4a,7a-dihydro-1H-cyclopenta[c]pyran-7,2'-furan]-4-carboxylate	Others	Lactones	C36H42O19	3	0.9991	80396-57-2	553569	510205	520119	13896.4	12108.6	15111.4	1.40577	0.00061911	0.00814049	38.5223	5.26762	up
FDATN01519	D-phenylalanine	Amino acids and derivatives	Amino acids and derivatives	C9H11NO2	3	0.9881	673-06-3	1.85739e+06	1.89704e+06	1.95462e+06	1.1137e+06	1.11362e+06	1105153	1.40462	0.00114931	0.0113713	1.71316	0.776658	insig
MW0152742	Loganin pentaacetate	Others	Lactones	C27H36O15	3	0.9828	20586-11-2	166123	171602	167887	269328	250094	253830	1.39764	0.0025637	0.0188284	0.653877	-0.61291	insig
MW0003013	2-Ethoxy-5-(4-methylpiperazin-1-yl)sulfonylbenzoic acid	Benzene and substituted derivatives	Benzene and substituted derivatives	C14H20N2O5S	3	0.982	194602-23-8	51756.7	53426.3	48023.1	122220	118148	115026	1.40172	2.36927e-05	0.0014258	0.431088	-1.21394	down
MW0139190	(1R,4E,5'S,6S,6'S,7R,8S,10R,11R,12S,14R,15S,16R,18E,20E,22R,25S,27R,28S)-22-ethyl-7,11,14,15-tetrahydroxy-6'-[(2R)-2-hydroxypropyl]-5',6,8,10,12,14,16,28,29-nonamethylspiro[2,26-dioxabicyclo[23.3.1]nonacosa-4,18,20-triene-27,2'-oxane]-3,9,13-trione	Heterocyclic compounds	Heterocyclic compounds	C45H74O11	3	0.966	579-13-5	224.01	5295.42	5876.15	7388.17	11141.8	16800.2	0.879967	0.0814241	0.19032	0.322546	-1.63243	insig
MEDP1465	(2S,3S)-butane-2,3-diol	Alcohol and amines	Alcohols	C4H10O2	3	0.9632	19132-06-0	642.19	2635.87	2493.88	160.85	65.56	134.97	1.30472	0.106568	0.233649	15.9719	3.99747	up
MW0004006	1-Naphthalenesulfonic acid, 3-hydroxy-	Benzene and substituted derivatives	Benzene and substituted derivatives	C10H8O4S	3	0.9598	6357-85-3	194683	131397	187789	260569	260126	228353	1.16302	0.0398637	0.114972	0.68603	-0.543657	insig
MEDP1310	4-Hydroxy-l-tryptophan	Amino acids and derivatives	Amino acids and derivatives	C11H12N2O3	3	0.9584	25242-90-4	459126	475304	477775	494142	517741	490729	1.16438	0.0499482	0.13346	0.939834	-0.0895224	insig
MW0111391	4-O-feruloyl-D-quinic acid	Organic acids	Organic acids	C17H20O9	3	0.9563	76272-56-5	29278.8	27489.3	32944.6	6113.01	1408.36	4215.92	1.3039	0.000287658	0.00532825	7.6434	2.93421	up
MW0115167	Primeverin	Benzene and substituted derivatives	Benzene and substituted derivatives	C20H28O13	3	0.9506	154-60-9	125191	126072	129102	179800	168459	165491	1.38506	0.00634648	0.0330607	0.740369	-0.433683	insig
MW0121655	1,2-Benzisothiazol-3(2H)-one, 5-nitro-, 1,1-dioxide	Benzene and substituted derivatives	Benzene and substituted derivatives	C7H4N2O5S	3	0.9464	22952-20-1	8477.53	14296.1	23259.2	18413.6	12468	15821.5	0.188357	0.964952	0.978382	0.985649	-0.0208539	insig
MEDP2105	3,6,9,12,15,18,21-Heptaoxatricosane-21,23-diol	Benzene and substituted derivatives	Benzene and substituted derivatives	C16H34O9	3	0.9321	5117-19-1	256419	213676	236301	241655	226649	213385	0.361869	0.611865	0.724534	1.03624	0.0513628	insig
MEDP1271	Bis(2-ethylhexyl) phthalate	Phenolic acids	Phenolic acids	C24H38O4	3	0.9305	117-81-7 | 15495-94-0 | 8033-53-2 | 50885-87-5 | 82208-43-3	171768	193075	221443	243261	262507	180970	0.686869	0.319521	0.487258	0.853726	-0.228155	insig
MW0006326	Dimethyloctadecylbenzylammonium	Benzene and substituted derivatives	Benzene and substituted derivatives	C27H50N+	3	0.9236	37612-69-4	1358.62	570209	815827	11266.7	546193	6200.45	0.259233	0.416503	0.573349	2.4614	1.29948	insig
MW0140018	(-)-Acanthocarpan	Heterocyclic compounds	Heterocyclic compounds	C17H12O7	3	0.9224	70285-12-0	121.29	321.1	242	2876.65	1223.85	2616.3	1.32994	0.0576548	0.149111	0.101892	-3.29488	down
MW0144176	9-Riburonosyladenine	Nucleotides and derivatives	Nucleotides and derivatives	C10H11N5O5	3	0.9216	3415-09-6	24843.7	13427.1	25237	1002.18	2007.72	4278.49	1.30326	0.0337196	0.101917	8.71356	3.12326	up
MEDP1067	Palmitoylisopropylamide	Lipids	Free fatty acids	C19H39NO	3	0.9198	189939-61-5	22129.6	31815.8	37610.3	35192.1	28887.6	952.11	0.593758	0.501638	0.640185	1.40786	0.493503	insig
MW0137092	7-Methoxy-3-(4-methoxyphenyl)-4-phenylchromen-2-one	Lignans and Coumarins	Coumarins	C23H18O4	3	0.915	113435-02-2	107040	108169	106937	174371	166288	170047	1.40423	0.00105213	0.0108073	0.630786	-0.664778	insig
MW0154497	Nifuradene	Others	Ketone compounds	C8H8N4O4	3	0.9117	555-84-0	143232	144545	163529	27937.8	30230.4	30087.4	1.40426	0.00263881	0.0190675	5.11361	2.35434	up
MW0010023	Usnic acid	Phenolic acids	Phenolic acids	C18H16O7	3	0.902	125-46-2	336.28	343.64	312.65	514.34	962.35	214.24	0.535082	0.396294	0.556357	0.586997	-0.768576	insig
MW0113950	[(2R,3R,4R,5R,6R)-2-[[(2R,3R,4R)-3,4-dihydroxy-4-(hydroxymethyl)oxolan-2-yl]oxymethyl]-4-[(2S,3R,4R,5R,6S)-4,5-dihydroxy-6-methyl-3-[(2S,3R,4S,5S)-3,4,5-trihydroxyoxan-2-yl]oxyoxan-2-yl]oxy-6-[2-(3,4-dihydroxyphenyl)ethoxy]-5-hydroxyoxan-3-yl] (E)-3-(3,4-dihydroxyphenyl)prop-2-enoate	Steroids	Steroid	C39H52O23	3	0.8978	188441-89-6	10659.5	26055.2	20657.1	4998.25	9534.38	17261	0.826755	0.216333	0.3776	1.80451	0.851607	insig
MEDP1657	1-O-Hexadecyl-sn-glycero-3-phosphocholine	GP	PC	C24H52NO6P	3	0.8952	52691-62-0 | 97288-09-0	1846.93	3382.53	4203.31	9097.09	10892.6	160.52	0.0830016	0.394879	0.555182	0.468122	-1.09504	insig
MW0156520	2-[(1R,5R)-5-[2,4-dihydroxy-3-(3-methylbut-2-enyl)benzoyl]-5-(2,4-dihydroxyphenyl)-3-methylcyclohex-2-en-1-yl]-1,3,5a,8-tetrahydroxy-10a-(3-methylbut-2-enyl)-[1]benzofuro[3,2-b]chromen-11-one	Heterocyclic compounds	Heterocyclic compounds	C45H44O12	3	0.8934	81381-69-3	5610.7	5009.54	4661.07	9394.91	10043.6	11056.8	1.37733	0.0021954	0.0172619	0.501103	-0.996822	insig
MW0154377	Neoschaftoside	Flavonoids	Flavones	C26H28O14	3	0.8911	61328-41-4	62.95	45532.9	58298.7	144797	97363.2	83331.5	0.772953	0.0451861	0.124873	0.319193	-1.6475	insig
MEDP2095	4-Methylbenzenecarbothioamide	Benzene and substituted derivatives	Benzene and substituted derivatives	C8H9NS	3	0.8771	2362-62-1	26427	19939.8	14332.3	14490.8	28110.1	21852.5	0.145369	0.823904	0.879296	0.941752	-0.0865807	insig
MW0147115	2-(3,4-dihydroxyphenyl)-5,7-dihydroxy-6-[(2S,3R,4R,5S,6R)-3,4,5-trihydroxy-6-(hydroxymethyl)oxan-2-yl]-8-[(2S,3R,4S,5S)-3,4,5-trihydroxyoxan-2-yl]chromen-4-one	Flavonoids	Flavones	C26H28O15	3	0.869	59952-97-5	103582	82842.9	61247.9	101182	107375	113204	0.947144	0.173479	0.326092	0.769741	-0.377555	insig
MW0142027	2,3-Diphenylquinoxaline-6-carboxylic acid	Organic acids	Organic acids	C21H14N2O2	3	0.8645	32387-96-5	8993.02	9529.07	15063.2	78882	74488.5	73870.3	1.38696	1.89679e-05	0.00133448	0.147796	-2.75832	down
FDATN01339	Vitexin 2''-O-rhamnoside	Flavonoids	Flavones	C27H30O14	3	0.8607	64820-99-1	90.7	226.2	114.74	4311.58	13280.1	1891.21	1.32734	0.208208	0.367554	0.0221548	-5.49624	down
MW0146867	Brevicolline	Alkaloids	Alkaloids	C17H19N3	3	0.8602	20069-02-7	12353.3	8470.27	18611.4	47916.7	209159	179918	1.27868	0.115656	0.247388	0.0902414	-3.47007	down
MEDP1836	Nootkatone	Terpenoids	Sesquiterpenoids	C15H22O	3	0.8546	4674-50-4 | 28834-25-5	89925.6	74714.3	85811	91540.3	81381.4	82702.3	0.231686	0.773254	0.842431	0.979763	-0.0294952	insig
MW0115331	Swertiamarin	Terpenoids	Monoterpenoids	C16H22O10	3	0.8515	17388-39-5	4001.23	11494.3	7602.8	5614.76	6280.36	9828.41	0.00721452	0.866763	0.910101	1.06329	0.0885294	insig
MW0141459	16alpha,17alpha-Dihydroxyprogesterone acetophenide	Others	Ketone compounds	C29H36O4	3	0.8437	1179-87-9 | 24356-94-3	25701.8	620.94	87.83	57882.1	1407.63	109953	0.791457	0.264965	0.433403	0.156051	-2.67991	insig
MW0120183	4-Amino-2-(methylthio)pyrimidine-5-carboxamide	Alcohol and amines	Amines	C6H8N4OS	3	0.8386	89533-28-8	346975	327551	301528	360355	311136	346604	0.465825	0.516688	0.651435	0.958706	-0.060839	insig
MW0000390	Oxymatrine	Alkaloids	Quinorisidine alkaloids	C15H24N2O2	3	0.8317	16837-52-8 | 54809-74-4	434035	424383	441507	971351	988192	942488	1.4054	0.000148167	0.00362065	0.447937	-1.15863	down
MW0000382	Ochrolifuanine A	Alkaloids	Alkaloids	C29H34N4	3	0.8265	35527-46-9	1862.48	1773.68	2243.41	10706.3	14098.2	18807	1.38441	0.032734	0.0999119	0.134817	-2.89093	down
MEDP2102	3-Methylbenzenecarbothioamide	Benzene and substituted derivatives	Benzene and substituted derivatives	C8H9NS	3	0.8221	2362-63-2	219664	218149	229493	246393	264038	250294	1.305	0.0118131	0.0498225	0.877198	-0.189026	insig
ZINC150355298	Kobophenol A	Others	Stilbene	C56H44O13	3	0.821	124027-58-3	265.5	695.22	530.76	469.03	290.33	1575.88	0.30877	0.563058	0.684203	0.638684	-0.646826	insig
MEDP1362	Methyl-tyrosine	Amino acids and derivatives	Amino acids and derivatives	C10H13NO3	3	0.813	19897-63-3	3161.85	744.97	768.3	582.79	234.5	2051.17	0.515374	0.574448	0.692428	1.62984	0.704727	insig
MW0157319	Synaptolepis factor K1	Terpenoids	Ditepenoids	C36H54O8	3	0.813	66268-94-8	407.79	240.44	343.49	1374.05	3211.28	1560.02	1.32922	0.097704	0.218009	0.161377	-2.63149	down
ZINC95909420	Aloeresin D	Flavonoids	Other Flavonoids	C29H32O11	3	0.8039	105317-67-7	272663	275416	265672	393309	384784	397910	1.40244	2.75956e-05	0.00154535	0.691964	-0.531231	insig
MW0154955	Pedilstatin	Terpenoids	Ditepenoids	C30H40O7	3	0.7984	70028-76-1	144.28	64.55	915.72	245.66	2335.79	123.02	0.400106	0.54958	0.673733	0.415812	-1.266	insig
MW0155573	Pilocereine	Heterocyclic compounds	Heterocyclic compounds	C45H65N3O6	3	0.7969	2552-47-8	1488.32	1901.61	1000.16	2415.43	831.35	1037.7	0.187997	0.953913	0.972971	1.02465	0.0351304	insig
MW0118297	2-Aminothiazole-5-carbonitrile	Heterocyclic compounds	Heterocyclic compounds	C4H3N3S	3	0.7946	51640-52-9	810541	923228	867966	1.24946e+06	1.23161e+06	1.00247e+06	1.22879	0.0503952	0.134476	0.746866	-0.421079	insig
MW0108971	O-benzyl-L-serine	Amino acids and derivatives	Amino acids and derivatives	C10H13NO3	3	0.7886	4726-96-9 | 30916-68-8	6324.1	22859.7	16066.5	20718.7	25207.1	11819	0.482845	0.540198	0.668943	0.783625	-0.351764	insig
MEDL00424	PAz-PC	GP	PC	C33H64NO10P	3	0.7885	117205-52-4	5839.81	5703.4	2973.09	5587.01	11050.7	12123.6	1.0051	0.128906	0.266444	0.504717	-0.986454	insig
MEDP1597	Securinine	Alkaloids	Terpenoid alkaloids	C13H15NO2	3	0.7882	5610-40-2	1821828	1.87847e+06	1.92213e+06	4.09066e+06	4.04834e+06	3.90625e+06	1.40471	5.42561e-05	0.00208344	0.466775	-1.0992	down
MW0142123	2',7-Dihydroxy-4',5'-methylenedioxyisoflavone	Flavonoids	Flavones	C16H10O6	3	0.7851	21495-84-1	44.88	190.16	141.55	1094.64	161.31	257.98	0.90203	0.32857	0.496177	0.24875	-2.00723	insig
MW0156203	Pterosterone	Steroids	Steroid	C27H44O7	3	0.7836	18089-44-6	4039.94	2823.22	762.92	1571.45	745.24	1783.71	0.536885	0.344943	0.511401	1.85984	0.895177	insig
MW0114989	Neohesperidose heptaacetate	Others	Saccharides	C26H36O17	3	0.7787	19949-47-4	126954	143061	111322	158433	173446	165665	1.22225	0.034449	0.103578	0.766439	-0.383757	insig
MEDP1307	(2S,3S)-2-amino-3-phenylbutanoic acid	Amino acids and derivatives	Amino acids and derivatives	C10H13NO2	3	0.7774	25488-25-9	829.57	633.62	385.51	1276.85	963.34	482.5	0.619742	0.347864	0.513551	0.678998	-0.558522	insig
MW0114793	Maltopentaose	Others	Saccharides	C30H52O26	3	0.7766	34620-76-3	97.49	1170.68	937.15	2144.28	1991.06	1873.56	0.943219	0.053238	0.140666	0.367009	-1.44611	insig
MW0119684	3-Methyl-1,5-Dihydropyrazolo[4,3-C]pyrazole	Heterocyclic compounds	Heterocyclic compounds	C5H6N4	3	0.776	42418-57-5	827450	857148	861918	1.12062e+06	1.13921e+06	1.12247e+06	1.40007	0.000150182	0.0036449	0.752895	-0.409479	insig
MW0004444	4,4'-Methylenebis(2,6-DI-tert-butylphenol)	Benzene and substituted derivatives	Benzene and substituted derivatives	C29H44O2	3	0.775	118-82-1	57908.2	85435.4	101284	115131	50234	60209.1	0.2764	0.805322	0.8647	1.08446	0.116982	insig
MW0000043	10-Hydroxycamptothecin	Alkaloids	Quinoline alkaloids	C20H16N2O5	3	0.7728	19685-09-7	25946.8	18892.6	27086.7	5068.88	11180.5	3710.63	1.25701	0.0075476	0.0371121	3.60351	1.8494	up
MW0002692	2-Amino-5-nitrobenzophenone	Benzene and substituted derivatives	Benzene and substituted derivatives	C13H10N2O3	3	0.7717	1775-95-7	263842	252374	232382	7553.8	7149.89	7127.07	1.40636	0.00143353	0.0129018	34.291	5.09976	up
MEDP1197	Hypotaurocyamine	Alcohol and amines	Polyamines	C3H9N3O2S	3	0.7707	1119-54-6	36930.6	20237.7	37192.8	15359.7	22943.8	26272.6	0.814998	0.217105	0.377876	1.46124	0.547192	insig
MEDP1670	Gly-Gly-Phe	Amino acids and derivatives	Amino acids and derivatives	C13H17N3O4	3	0.7667	6234-26-0	526.9	330.25	559.91	626.1	863.14	424.98	0.669756	0.333611	0.50108	0.740281	-0.433856	insig
MW0147897	Cyanidin 3-rutinoside-5-glucoside	Flavonoids	Anthocyanidins	C33H41ClO20	3	0.7642	62024-14-0	426.64	433.55	358.35	2540.32	45.28	125.84	0.286556	0.605128	0.718879	0.449407	-1.15391	insig
MEDP1679	Glu-Val-Phe	Amino acids and derivatives	Amino acids and derivatives	C19H27N3O6	3	0.762	31461-61-7	2196.68	454.61	1110.31	147148	105000	64643.2	1.3727	0.0483013	0.130462	0.0118741	-6.39604	down
MW0157192	Squamocin	FA	Others	C37H66O7	3	0.7563	120298-30-8	5907.77	4996.92	13754.4	14107.8	10656.6	20386.9	0.953438	0.161284	0.310405	0.546143	-0.87265	insig
MW0114124	Curculigoside	Phenolic acids	Phenolic acids	C22H26O11	3	0.7558	85643-19-2	32736.5	29124.6	30039.7	45480.8	45167.2	39735.3	1.33966	0.00781199	0.038041	0.704851	-0.50461	insig
MW0155592	Piptanthine	Alkaloids	Alkaloids	C20H35N3	3	0.7507	7344-67-4	3.40729e+06	3.53482e+06	3.41737e+06	3.03743e+06	3.03025e+06	3.03737e+06	1.38382	0.00926502	0.0421156	1.13777	0.186213	insig
Zmgn000503	2,3-Dihydroxy-3-methylbutanoic acid	Organic acids	Organic acids	C5H10O4	3	0.7443	1756-18-9	641.58	810.4	878.6	1227.39	6798.86	5245.5	1.14507	0.158905	0.308056	0.175605	-2.5096	down
MW0148218	Delavaine A	Benzene and substituted derivatives	Benzene and substituted derivatives	C38H54N2O11	3	0.7442	109291-57-8	3706.32	1125.6	634.9	1733.98	8280.02	2979.63	0.781917	0.344546	0.511401	0.420731	-1.24903	insig
MEDP0734	2-Aminophenol	Alkaloids	Phenolamine	C6H7NO	3	0.7442	95-55-6	544428	547309	561543	572310	548270	551319	0.449634	0.541952	0.670291	0.988863	-0.0161576	insig
MW0154445	Neurosporaxanthin	Terpenoids	Tetraterpenes	C35H46O2	3	0.7433	2468-88-4	518.04	1542.25	2316.89	6042.77	1908.53	958.97	0.552682	0.439909	0.588883	0.491251	-1.02547	insig
MW0054900	Methyl linolenate	Lipids	Free fatty acids	C19H32O2	3	0.7431	301-00-8	635785	701192	400547	439356	423826	680727	0.339175	0.629079	0.738412	1.12541	0.170445	insig
MW0015923	Artemisinin	Terpenoids	Sesquiterpenoids	C15H22O5	3	0.7408	63968-64-9	133997	204387	121570	149659	124336	132607	0.399469	0.567103	0.686654	1.13122	0.177877	insig
MW0157326	methyl (1R,12R,14S,15E)-12-[(1R,15S,17S,18S)-17-ethyl-3,13-diazapentacyclo[13.3.1.02,10.04,9.013,18]nonadeca-2(10),4(9),5,7-tetraen-6-yl]-15-ethylidene-17-methyl-10,17-diazatetracyclo[12.3.1.03,11.04,9]octadeca-3(11),4,6,8-tetraene-18-carboxylate	Alkaloids	Alkaloids	C40H48N4O2	3	0.7398	59626-92-5	554003	482127	525097	66300.6	53110.8	68589.5	1.40169	0.00131676	0.0122332	8.30436	3.05387	up
MW0115414	2-Propanol, 1-[2-(2-methoxy-1-methylethoxy)-1-methylethoxy]-	Alcohol and amines	Alcohols	C10H22O4	3	0.7382	20324-33-8	48077.3	55821.7	60676.8	107947	107851	103354	1.37702	0.00175352	0.0146618	0.515667	-0.955488	insig
MW0001490	14-((4-Methoxyphenyl)diphenylmethoxy) Daunomycinone	Benzene and substituted derivatives	Benzene and substituted derivatives	C41H34O10	3	0.7378	59326-04-4	186757	179651	192878	310803	301515	313628	1.40063	2.11392e-05	0.00138513	0.604016	-0.727341	insig
MW0055375	Nostoxanthin	FA	Others	C40H56O4	3	0.735	29307-44-6	661.5	1700.87	560.16	71.94	221.44	97.11	1.26804	0.144511	0.288247	7.48426	2.90386	up
MW0156443	Rugosal	Others	Others	C15H22O4	3	0.7339	121387-05-1	26968.3	19550.3	28455.8	22483.6	31240	29650.3	0.465715	0.507617	0.644431	0.899256	-0.153196	insig
MW0000116	ATM4 4-Acetoxy Analog	Benzene and substituted derivatives	Benzene and substituted derivatives	C23H25NO5	3	0.7332	91295-74-8	38.18	46.77	249.11	56.8	89.32	202.11	0.27287	0.957177	0.97498	0.959309	-0.0599333	insig
MW0000486	Ethyl eburnamenine-14-carboxylate	Alkaloids	Alkaloids	C22H26N2O2	3	0.7319	77549-94-1 | 68780-77-8	312.78	592.16	1466.82	25387.7	5831.54	1805.06	1.11446	0.295621	0.463611	0.0718187	-3.7995	down
ZINC13548595	(9Z,12Z)-octadeca-9,12-dienal	Lipids	Free fatty acids	C18H32O	3	0.7306	2541-61-9	19869.5	22979	27933.8	44108.2	44293.9	55158.2	1.32887	0.00796703	0.0385168	0.493049	-1.0202	down
MW0000297	Hydroquinidine	Alkaloids	Quinoline alkaloids	C20H26N2O2	3	0.7303	1435-55-8	80730.1	72383.4	80396.3	52603	71424	17969	0.857628	0.18756	0.34453	1.64448	0.717633	insig
MW0150782	Hexadecasphinganine	SL	SPH	C16H35NO2	3	0.73	28457-97-8	82713.2	98047.5	106132	264252	257395	270894	1.39175	0.000157339	0.0037317	0.361991	-1.46598	down
MW0137300	Agathisflavone	Flavonoids	Flavones	C30H18O10	3	0.7299	28441-98-7	97.66	3577.95	6194.36	4363.45	4059.29	4767.52	0.59657	0.595622	0.710173	0.748277	-0.418355	insig
MW0142070	2,5-Diamino-6-hydroxy-4-(5-phosphoribosylamino)pyrimidine	Others	Others	C9H16N5O8P	3	0.7286	73477-63-1	625.18	914.07	475.11	329.81	256.72	725.56	0.788891	0.29588	0.463657	1.53523	0.618455	insig
MW0154886	Paniculatin	Lignans and Coumarins	Coumarins	C27H30O15	3	0.725	32361-88-9	24831.2	21402.8	23112.5	17671.7	76.24	15180.9	0.71877	0.154051	0.301815	2.10595	1.07447	insig
MW0116659	1,3-dimethyl-1H-pyrazolo[3,4-b]pyridin-5-amine	Alcohol and amines	Amines	C8H10N4	3	0.7224	19736-04-0	10034.3	11132.5	12136.2	14654.1	12663.2	12940.1	1.12646	0.0560832	0.146172	0.827254	-0.273597	insig
MW0154658	CID 91895359	Phenolic acids	Phenolic acids	C31H42O17	3	0.7217	39011-92-2	4759.02	5533.45	1479.29	8515.49	8699.13	1760.03	0.403834	0.421977	0.575385	0.620394	-0.688743	insig
MW0155616	Plaunol B	Others	Lactones	C20H20O6	3	0.7211	69749-00-4	54880.6	54386.9	58108.4	49563.1	62445.6	54974.9	0.0658983	0.975927	0.984966	1.00235	0.00338566	insig
MW0116680	4-Thiazolylacetonitrile	Heterocyclic compounds	Heterocyclic compounds	C5H4N2S	3	0.7208	7709-59-3	935094	955142	950568	1.37292e+06	1.30583e+06	1.19836e+06	1.36193	0.0197738	0.0709323	0.732712	-0.448682	insig
MW0147903	Keracyanin	Flavonoids	Anthocyanidins	C27H31ClO15	3	0.7206	18719-76-1	1148.52	8542.24	7895.11	8956.74	13169.5	9901.86	0.789289	0.168836	0.31975	0.549077	-0.86492	insig
MW0052353	Digoxigenin	Steroids	Cardiac glycoside	C23H34O5	3	0.719	1672-46-4	235895	241321	234527	266701	259317	248163	1.23734	0.0467051	0.127326	0.919347	-0.121318	insig
MW0117457	2-(o-Aminophenyl)-2H-benzotriazole	Benzene and substituted derivatives	Benzene and substituted derivatives	C12H10N4	3	0.717	1211-08-1	25298.1	31212	34820.5	19605.3	14774.6	5375.4	1.07436	0.0331205	0.100635	2.29732	1.19995	up
MW0008687	N-[3-(dimethylamino)propyl]naphthalene-2-sulfonamide	Benzene and substituted derivatives	Benzene and substituted derivatives	C15H20N2O2S	3	0.7169	282720-12-1	226.43	369.51	111.13	185.63	176.08	290.86	0.0132375	0.841711	0.892395	1.08352	0.11572	insig
mws3108_N	2,4-Dihydroxypyrimidine-5-carboxylic acid	Nucleotides and derivatives	Nucleotides and derivatives	C5H4N2O4	3	0.7167	23945-44-0 | 59299-01-3 | 394-40-1 | 76821-79-9	641071	648012	631656	1.50428e+06	1.40441e+06	1.47186e+06	1.40494	0.00100118	0.0105124	0.438469	-1.18945	down
MW0063351	Methyl ricinoleate	FA	Others	C19H36O3	3	0.7165	141-24-2 | 41989-07-5	54606.5	79706.9	71021.4	166215	75658.4	188287	1.04416	0.156557	0.305472	0.477344	-1.0669	down
MW0117743	2,1,3-Benzothiadiazole-4-carbaldehyde	Benzene and substituted derivatives	Benzene and substituted derivatives	C7H4N2OS	3	0.7158	5170-68-3	40729.6	32460.1	16670.9	86088.5	78371.1	70216.8	1.23991	0.00720732	0.0360165	0.382912	-1.38491	down
MEDP1228	Heterodendrin	Others	Others	C11H19NO6	3	0.7154	66465-22-3	19489.5	15236.1	19633	73723.4	67098.6	68325.2	1.39513	7.0712e-05	0.00237207	0.259906	-1.94394	down
MW0063305	Radiclonic acid	Terpenoids	Ditepenoids	C23H40O5	3	0.7153	49620-14-6	53299.6	53125.6	50000.3	123557	118302	118207	1.40427	2.91671e-05	0.00161098	0.434437	-1.20278	down
MW0147243	Cassine	Alkaloids	Alkaloids	C18H35NO2	3	0.7151	5227-24-7	116498	121469	119324	150134	165907	158781	1.37324	0.00833285	0.039761	0.752474	-0.410286	insig
MW0155028	Pfaffic acid	Terpenoids	Triterpene	C29H44O3	3	0.7128	86432-14-6	87284.9	90876.3	93059	201771	118370	104470	0.996859	0.234163	0.396366	0.638749	-0.646679	insig
MW0146529	Bakankoside	Steroids	Steroid	C16H23NO8	3	0.712	1398-17-0	203.13	911.74	595.67	2662.01	2832.23	2734.07	1.25136	0.00632808	0.0330075	0.207885	-2.26614	down
MW0104799	Methyl 1-methyl-2-oxocyclopentanecarboxylate	Organic acids	Organic acids	C8H12O3	3	0.7113	30680-84-3	167.48	681.8	1061.02	32.99	681.7	117.86	0.73664	0.339846	0.506752	2.29452	1.19819	insig
MW0117181	1-Methylbenzoimidazol-5-amine	Benzene and substituted derivatives	Benzene and substituted derivatives	C8H9N3	3	0.7111	10394-38-4	4178.83	2953.38	4783.04	6574.62	7050.27	4708.91	1.06068	0.0799341	0.187598	0.649906	-0.621697	insig
MW0146438	Auricularine	Heterocyclic compounds	Heterocyclic compounds	C33H42N4	3	0.7102	73706-32-8	18150.4	16937.3	29709.8	13352.8	11177.5	6969.64	1.13832	0.0952056	0.213552	2.05707	1.04059	up
MW0011404	Farnesylacetone	Others	Ketone compounds	C18H30O	3	0.7101	1117-52-8 | 762-29-8	13094.6	6097.03	8333.76	98450.3	81592.7	109259	1.38	0.00577525	0.0312561	0.0951443	-3.39374	down
MW0127533	1-(2-Adamantyl)-3-butylthiourea	Others	Others	C15H26N2S	3	0.7099	87170-66-9	2626.66	589.06	4248.38	20953.6	17858.8	14306.9	1.23725	0.00543679	0.0300289	0.140516	-2.8312	down
MW0117708	2-(Hydroxymethyl)-6-methylpyridin-3-ol	Alkaloids	Pyridine alkaloids	C7H9NO2	3	0.7098	42097-42-7	22.26	3452.06	2527.8	55.82	2716.33	3009.61	0.0935282	0.960412	0.976148	1.03811	0.0539634	insig
MW0148557	(Carboxymethyl)(dimethyl)sulfonium	Others	Lactones	C4H9O2S+	3	0.7096	24220-08-4	2.3574e+06	2.31508e+06	2.38519e+06	3.31606e+06	3.15623e+06	3.11531e+06	1.3941	0.00257078	0.0188461	0.736124	-0.441979	insig
MW0145140	Anopterine	Others	Lactones	C31H43NO7	3	0.7079	38826-62-9	1498.07	249.48	706.71	7388.82	760.75	7388.75	0.951856	0.184195	0.340288	0.157949	-2.66247	insig
MW0141853	Agecorynin C	Benzene and substituted derivatives	Benzene and substituted derivatives	C22H24O9	3	0.7057	70460-31-0	2736.43	3276.43	2023.38	3118.63	528	2177.1	0.610181	0.44697	0.593409	1.37991	0.464577	insig
MW0103202	Zygadenine	Alkaloids	Steroid alkaloids	C27H43NO7	3	0.7047	545-45-9	755378	754884	693080	1.28206e+06	1.19834e+06	1.20214e+06	1.39334	0.000210442	0.00445591	0.598321	-0.741008	insig
MW0150729	Hellicoside	Phenolic acids	Phenolic acids	C29H36O17	3	0.7046	132278-04-7	1735.26	7235.2	7142.91	6831.81	7795	9479.29	0.719248	0.27944	0.44756	0.668435	-0.58114	insig
MEDL00798	3-Hydroxyphenylurea	Benzene and substituted derivatives	Benzene and substituted derivatives	C7H8N2O2	3	0.7031	701-82-6	454215	450534	461988	415005	404092	438499	1.20598	0.0578186	0.149395	1.08679	0.120067	insig
MW0160079	3-Hydroxy-2,4,5-trihydroxymethylpyridine	Alkaloids	Pyridine alkaloids	C8H11NO4	3	0.702	29712-70-7	27965.3	23727	18154.8	20683.6	25118.1	13107.9	0.536203	0.466267	0.609792	1.18567	0.245699	insig
MW0120045	4,5-Dihydroxyimidazolidin-2-one	Others	Ketone compounds	C3H6N2O3	3	0.7	3720-97-6	111392	117441	109561	75404.1	76600.9	75534.4	1.39862	0.00342986	0.0223051	1.48719	0.572587	insig
MW0116444	1-(4-Isopropylphenyl)-5-oxopyrrolidine-3-carboxylic acid	Organic acids	Organic acids	C14H17NO3	3	0.7	63674-51-1	77241.2	91617	96447.4	87521	90941.8	85214.8	0.0218219	0.935157	0.959917	1.00617	0.00888006	insig
MW0140758	Taxol F	Others	Others	C48H53NO14	3	0.6986	173101-56-9	13016.2	24326.8	24206.3	29156.5	28095.2	27931.6	0.926528	0.169201	0.320139	0.722551	-0.468828	insig
MW0015225	7-oxo-11-Dodecenoic acid	Lipids	Free fatty acids	C12H20O3	3	0.6972	54921-60-7	1.10126e+06	1.17599e+06	1.22659e+06	1.51549e+06	1.46121e+06	1.12974e+06	0.862883	0.232652	0.394139	0.853256	-0.22895	insig
MW0010239	Colchicine	Alkaloids	Alkaloids	C22H25NO6	3	0.6971	64-86-8 | 30512-31-3	230.44	7279.24	322.32	221.71	175.32	723.27	0.541393	0.439129	0.588424	6.99098	2.8055	insig
MW0147478	Cicutoxin	Alcohol and amines	Alcohols	C17H22O2	3	0.697	505-75-9	772881	680260	646062	757930	803233	700500	0.698214	0.326956	0.49411	0.928168	-0.107542	insig
MW0150279	Glutinosone	Terpenoids	Sesquiterpenoids	C14H20O2	3	0.6968	55051-94-0	28888.1	67934.2	73191.7	51298.8	69384.4	90972.6	0.517879	0.486924	0.628742	0.803257	-0.316066	insig
MW0159452	Zhebeinine	Alkaloids	Alkaloids	C27H45NO3	3	0.6968	135636-54-3	36313.9	34572.3	32751.2	323.75	7670.62	8600.32	1.0717	0.00350855	0.0227435	6.24521	2.64275	up
MW0153955	Montanin	Terpenoids	Ditepenoids	C32H48O8	3	0.6967	66583-55-9	99684.7	109009	94657.8	193740	137624	107036	0.976557	0.21579	0.376815	0.69195	-0.53126	insig
MW0119782	3-Vinyl-1,2-dithiacyclohex-4-ene	Heterocyclic compounds	Heterocyclic compounds	C6H8S2	3	0.6959	62488-52-2	19227.4	23548.4	21054.8	17356.1	18668.6	16306.5	1.14394	0.0721706	0.174765	1.21975	0.28658	insig
MW0014324	4(5)-EpDPE methyl ester	Organic acids	Organic acids	C23H34O3	3	0.6958	121818-29-9	128069	130456	84072.7	106396	77818.1	220.73	0.67669	0.234614	0.396687	1.85756	0.893406	insig
MW0144228	Acanthifolicin	Organic acids	Organic acids	C44H68O13S	3	0.6953	77739-71-0	767.4	147.09	101.21	2209.84	375.98	4166.67	0.995746	0.219575	0.379968	0.150419	-2.73295	insig
MW0004424	2(1H)-Pyrimidinethione, 3,4-dihydro-1-(p-tolyl)-4,4,6-trimethyl-	Benzene and substituted derivatives	Benzene and substituted derivatives	C14H18N2S	3	0.6951	19017-40-4	4985.82	3973.93	3668.1	3772.9	4471.75	4460.44	0.0752273	0.958703	0.975317	0.993921	-0.00879757	insig
MW0152837	Lycoricidine	Alkaloids	Isoquinoline alkaloids	C14H13NO6	3	0.6945	19622-83-4	15758.8	12283.2	119.44	252.18	10524.5	55.13	0.49869	0.385454	0.546851	2.59987	1.37844	insig
MW0014548	4-Oxo-4-[(4-phenyloxan-4-yl)methylamino]butanoic acid	Organic acids	Organic acids	C16H21NO4	3	0.6945	6104-83-2	4860.05	7655.97	7233.33	6679.9	7378.82	5138.18	0.0797113	0.874963	0.915849	1.02878	0.0409318	insig
MW0156616	Sennoside D	Benzene and substituted derivatives	Benzene and substituted derivatives	C42H40O19	3	0.6935	37271-17-3	402.79	44.38	156.48	57.28	35.84	138.5	0.635718	0.362943	0.527597	2.60621	1.38195	insig
MW0142559	2'-Phospho-5'-adenylyl sulfate	Nucleotides and derivatives	Nucleotides and derivatives	C10H15N5O13P2S	3	0.6929	62230-89-1	42840.1	45586	19912.8	144267	59132.8	95598.8	1.13669	0.111849	0.242307	0.362339	-1.46459	down
MW0128343	(E)-Ethyl 3-(2-cyanophenyl)acrylate	Others	Lactones	C12H11NO2	3	0.6924	223567-59-7	9973.96	11943.4	8486.5	9943.61	8621.02	9301.87	0.48731	0.496214	0.635961	1.09105	0.125723	insig
MW0138770	Licochalcone a	Flavonoids	Chalcones	C21H22O4	3	0.6921	58749-22-7	4379.09	16048	9589.63	37988.7	38991.3	41919.5	1.25671	0.00720866	0.0360165	0.252455	-1.9859	down
MW0126471	8-Demethyl-8-(dimethylamino)riboflavin	Heterocyclic compounds	Heterocyclic compounds	C18H23N5O6	3	0.6894	51093-55-1	413145	410010	398011	384878	343286	326454	1.16651	0.0768107	0.182442	1.15792	0.211538	insig
MW0003256	2-Methylbenzhydrol	Benzene and substituted derivatives	Benzene and substituted derivatives	C14H14O	3	0.6893	5472-13-9	55553.4	53088.7	48953.7	53525.8	54996.9	52470.4	0.386532	0.62668	0.736617	0.978898	-0.030769	insig
MW0017134	cis-11-Methyl-2-dodecenoic acid	Lipids	Free fatty acids	C13H24O2	3	0.6883	677354-23-3	8297.82	4188.68	4161.99	7376.19	5626.36	6033.66	0.496954	0.631939	0.740906	0.87457	-0.193355	insig
MEDL00543	3-Methyladipic acid	Organic acids	Organic acids	C7H12O4	3	0.6877	3058-01-3 | 61898-58-6	343.05	371.73	93.25	314.82	9.95	429.28	0.381281	0.912781	0.944402	1.07159	0.0997487	insig
MW0002290	2,4-Di-tert-butyl-6-dimethylaminomethyl-phenol	Benzene and substituted derivatives	Benzene and substituted derivatives	C17H29NO	3	0.6866	32857-07-1	578.15	2696.87	1894.96	12549.7	11965.2	11082.1	1.28618	0.000349901	0.00597772	0.145237	-2.78352	down
MW0105949	Aspartylglutamate	Amino acids and derivatives	Amino acids and derivatives	C9H14N2O7	3	0.6857	6157-06-8	38357.9	36249.1	17688.9	64187.2	23651.9	35353.7	0.454643	0.505837	0.642778	0.749199	-0.41658	insig
MW0108619	N-Acetyl-D-phenylalanine	Amino acids and derivatives	Amino acids and derivatives	C11H13NO3	3	0.685	10172-89-1	6971.69	6295.17	6115.62	2155.78	1496.37	626.28	1.28096	0.00163155	0.0139669	4.53028	2.1796	up
MW0008432	4-methyl-N-(naphthalen-1-yl)thiazol-2-amine	Benzene and substituted derivatives	Benzene and substituted derivatives	C14H12N2S	3	0.6847	1957-01-3	15177.4	15511.9	16262.3	9864.65	8832.61	9121.65	1.39154	0.000138405	0.00354791	1.68776	0.755109	insig
MW0148193	Decuroside III	Lignans and Coumarins	Coumarins	C26H34O14	3	0.6842	96638-81-2	131455	131633	123212	201914	200243	199705	1.39995	0.000882425	0.00977455	0.641841	-0.639712	insig
MW0157436	4-[2,2-Bis(diethoxyphosphoryl)ethenyl]-2,6-ditert-butylphenol	Organic acids	Organic acids	C24H42O7P2	3	0.6842	126411-39-0	661.15	229.42	832.91	3605.11	607.13	7296.32	0.974988	0.233078	0.394695	0.149756	-2.73931	insig
MW0144266	Acetylatractylodinol	Others	Lactones	C15H12O3	3	0.684	61582-39-6	171831	141390	176983	220723	231778	172473	1.01362	0.117346	0.249678	0.78436	-0.350411	insig
MW0119131	3-methylsulfanyl-4-oxo-6,7-dihydro-5H-2-benzothiophene-1-carboxylic acid	Organic acids	Organic acids	C10H10O3S2	3	0.6838	168279-58-1	12223.4	15859.9	7524.59	21922	12758.1	29124.3	0.92899	0.175996	0.329901	0.558079	-0.841459	insig
MW0001927	2-[(4-Hydroxy-3,5-dimethoxyphenyl)methylidene]propanedinitrile	Phenolic acids	Phenolic acids	C12H10N2O3	3	0.6835	59832-13-2	5275.09	8108.48	2353.11	7431.08	4326.81	3240.38	0.0197264	0.912018	0.943855	1.04923	0.0693351	insig
MEDN1197	8-Methoxyalkynurate	Organic acids	Organic acids	C11H9NO4	3	0.6826	2929-14-8	6655.19	8438.76	8482.88	10589.1	9854.52	10277.8	1.20002	0.0457888	0.125935	0.767439	-0.381876	insig
MW0007527	Lucidin	Quinones	Anthraquinone	C15H10O5	3	0.6819	478-08-0	31.69	150.8	26.85	89.1	46.44	6.9	0.359754	0.665258	0.765066	1.46967	0.555494	insig
MW0052512	cis-5,8,11,14,17-Eicosapentaenoic acid methyl ester	FA	Others	C21H32O2	3	0.6818	2734-47-6	17397.4	11511.6	17208.3	26856	25888.2	27625.3	1.2689	0.0217136	0.0754084	0.573817	-0.801336	insig
MW0114576	Helicide	Phenolic acids	Phenolic acids	C13H16O7	3	0.6816	80154-34-3	288.34	219.79	172.03	11479.2	128.83	169.52	0.475872	0.430637	0.582075	0.0577507	-4.11402	insig
MW0118122	2-[1-(2-hydroxybenzyl)-1H-benzimidazol-2-yl]phenol	Benzene and substituted derivatives	Benzene and substituted derivatives	C20H16N2O2	3	0.6815	85573-12-2	358.99	798.94	307.59	936.8	202.61	973.18	0.285567	0.513253	0.648169	0.693708	-0.5276	insig
MW0147892	cyanidin 3-O-(6-O-glucosyl-2-O-xylosylgalactoside)	Flavonoids	Anthocyanidins	C32H39O20+	3	0.6815	60029-67-6	20916.9	521.99	180.13	31245.2	110.84	14943.6	0.328067	0.509798	0.646385	0.466936	-1.0987	insig
MW0011966	1,8-Octanediol	Alcohol and amines	Alcohols	C8H18O2	3	0.6814	629-41-4 | 31762-64-8	12465.8	2849.83	10502.6	48316.1	43830.6	58588.7	1.26371	0.0023642	0.0179519	0.171282	-2.54556	down
MW0156499	Salannin	Terpenoids	Triterpene	C34H44O9	3	0.6811	992-20-1	376.25	583.75	604.5	5281.71	4171.22	5396.96	1.39055	0.00624468	0.032769	0.105354	-3.24668	down
MW0016022	Azadiradione	Terpenoids	Triterpene	C28H34O5	3	0.6792	26241-51-0	10628.2	10772.1	5338.07	34565.7	30179.8	55808.9	1.30979	0.0523197	0.13833	0.221795	-2.1727	down
MW0009686	Rivenprost	Benzene and substituted derivatives	Benzene and substituted derivatives	C24H34O6S	3	0.6785	256382-08-8	24044.5	24043.7	23776.2	16481.3	17976.5	20377.6	1.28357	0.0370047	0.109226	1.31055	0.39017	insig
MW0160340	2,2,6,6-Tetramethyl-1,3-dithiane-4-thione	Others	Ketone compounds	C8H14S3	3	0.6783	57274-32-5	60252.2	49066.8	62727.1	49012.4	67861.7	53880.3	0.0661068	0.954401	0.972981	1.00756	0.0108723	insig
MW0155643	Podorhizol beta-D-glucoside	Lignans and Coumarins	Lignans	C28H34O13	3	0.6776	17187-73-4	25231.1	39230.8	35828.9	6932.05	11125.9	10622.5	1.33986	0.0217858	0.0755292	3.49683	1.80605	up
MW0154876	Pancratistatin	Alkaloids	Alkaloids	C14H15NO8	3	0.6771	96203-70-2	49569.8	45958.6	48852	60505.6	53647.5	54781.6	1.22834	0.0416325	0.118363	0.854653	-0.22659	insig
MW0103939	Hydroxyisoleucine	Amino acids and derivatives	Amino acids and derivatives	C6H13NO3	3	0.6764	55399-93-4 | 50764-07-3	34658.7	34879	21245.1	7881.84	16563.8	7933.81	1.23117	0.0290132	0.0922613	2.80372	1.48734	up
ZINC36383810	Acuminaminoside	Heterocyclic compounds	Heterocyclic compounds	C22H23NO8	3	0.6764	769954-40-7	5504.05	4664.63	2732.13	1782.89	3739.4	2105.85	0.923771	0.166133	0.317422	1.69121	0.758058	insig
MW0111615	1-(3,4-Dimethoxyphenyl)propan-1-one	Others	Ketone compounds	C11H14O3	3	0.6757	1835-04-7	1208.72	1340.2	451.49	1083.39	1556.67	1156.79	0.576043	0.458541	0.603398	0.790237	-0.339643	insig
MW0006211	Benzenesulfonimidic acid	Benzene and substituted derivatives	Benzene and substituted derivatives	C6H7NO2S	3	0.6755	4388-24-3	563.47	1052.86	664.76	351.21	86.39	971.12	0.719879	0.402609	0.561702	1.61926	0.695338	insig
MW0145042	Amphibine B	Benzene and substituted derivatives	Benzene and substituted derivatives	C39H47N5O5	3	0.6755	38541-74-1	1406.76	17927.5	13861.5	15559.4	21151	15032	0.668764	0.342121	0.508719	0.641559	-0.640345	insig
MW0105592	alpha-Amanitine	Heterocyclic compounds	Heterocyclic compounds	C39H54N10O14S	3	0.6754	23109-05-9	18804.5	20867.8	13969.9	1637.66	3319.95	90.36	1.14445	0.00691711	0.03517	10.6265	3.4096	up
MW0107974	Lupulone	Others	Others	C26H38O4	3	0.6739	468-28-0	147305	190631	132431	171804	171987	171680	0.607054	0.479873	0.622338	0.912499	-0.132105	insig
MW0137633	Chalepensin	Heterocyclic compounds	Heterocyclic compounds	C16H14O3	3	0.6731	13164-03-9	130939	132110	145008	139081	142160	136188	0.450651	0.570472	0.689698	0.977549	-0.0327595	insig
MW0154151	N(2)-malonyl-D-tryptophan	Amino acids and derivatives	Amino acids and derivatives	C14H14N2O5	3	0.6715	3184-74-5	97266.5	97891.3	95663.8	114763	119819	108539	1.32473	0.0291459	0.0924996	0.847575	-0.238587	insig
MW0123963	Ethyl 3-amino-5-nitrothieno[2,3-b]pyridine-2-carboxylate	Others	Lactones	C10H9N3O4S	3	0.671	52505-43-8	356608	361066	284266	852612	837797	815898	1.38681	0.000621899	0.00814122	0.399767	-1.32277	down
MW0128015	Epiafzelechin trimethyl ether	Benzene and substituted derivatives	Benzene and substituted derivatives	C18H20O5	3	0.6708	3143-21-3	228624	205023	200095	179800	181666	199569	1.06168	0.0957607	0.214623	1.12959	0.175804	insig
MW0122505	7-Methoxy-4H-chromen-4-one	Others	Ketone compounds	C10H8O3	3	0.6696	5751-52-0	1322.11	512.77	865.34	1586.22	1894.5	3576.03	1.11936	0.13075	0.269089	0.382644	-1.38593	down
MW0154873	(1R,6R,11S,13S,14R,21R)-7,19,23-triazahexacyclo[9.9.1.11,13.12,6.07,21.014,19]tricosane	Alkaloids	Alkaloids	C20H33N3	3	0.6695	2448-27-3	56194.1	69590.7	65787.8	52614.6	75612.3	75184.1	0.253402	0.676553	0.772942	0.941801	-0.0865064	insig
MW0000171	Catharanthine	Alkaloids	Plumerane	C21H24N2O2	3	0.669	2468-21-5	85.82	503.22	1303.17	17373.3	11132.4	146.72	0.727548	0.218004	0.37855	0.0660402	-3.92051	insig
MW0136956	7-Diethylamino-3-phenylcoumarin	Lignans and Coumarins	Coumarins	C19H19NO2	3	0.6686	84865-19-0	201.91	14.48	103.22	261.88	291.68	165.59	0.858245	0.122471	0.257317	0.444427	-1.16998	insig
MW0136999	7-hydroxy-3-(2-methoxyphenyl)-4H-chromen-4-one	Flavonoids	Isoflavones	C16H12O4	3	0.6686	63909-40-0	86.89	37097.2	38442.3	105.23	48040.3	363.97	0.348518	0.680263	0.774809	1.559	0.640621	insig
MW0000198	Corynoline	Alkaloids	Isoquinoline alkaloids	C21H21NO5	3	0.6684	18797-79-0 | 68035-45-0	17092.9	17916.2	15115.6	157.85	494.77	562.22	1.37687	0.00214866	0.0171214	41.2603	5.36668	up
MW0157364	Taxodone	Terpenoids	Ditepenoids	C20H28O3	3	0.667	19039-02-2	192.21	89.41	33.79	1206.98	216.46	927.68	1.13714	0.144901	0.288656	0.134153	-2.89805	down
MW0007080	Ethyl 4-hydroxy-3,5-dimethoxybenzoate	Benzene and substituted derivatives	Benzene and substituted derivatives	C11H14O5	3	0.6667	3943-80-4	17422.7	14676.7	18322.2	15860.1	13288.8	10391.8	0.943713	0.140984	0.28508	1.27518	0.350703	insig
MW0127242	2-[(4-Methylbenzyl)sulfanyl]aniline	Benzene and substituted derivatives	Benzene and substituted derivatives	C14H15NS	3	0.6656	136620-24-1	4874.78	5429.41	6033.76	1341.54	1074.51	302.22	1.26973	0.000592734	0.00798789	6.01042	2.58747	up
MW0116170	s-Triazolo(3,4-b)benzothiazole-3-thiol	Benzene and substituted derivatives	Benzene and substituted derivatives	C8H5N3S2	3	0.6651	6957-85-3	9546.58	1293.28	816.57	403.5	2791	440.65	0.639602	0.448105	0.594329	3.20659	1.68104	insig
FDATN00279	Morin hydrate	Flavonoids	Flavonols	C15H12O8	3	0.6645	654055-01-3 | 6202-27-3	22232.1	32.97	27815.5	22646.8	23613.5	15058.9	0.57775	0.708709	0.795853	0.816718	-0.29209	insig
MW0148467	3,3'-(6,6'-Dihydroxy-5,5'-dimethoxy[1,1'-biphenyl]-3,3'-diyl)di(prop-2-enoic acid)	Benzene and substituted derivatives	Benzene and substituted derivatives	C20H18O8	3	0.6638	436-96-4 | 60299-54-9	305.63	8403.43	497.03	34.76	6900.32	89.01	0.469945	0.846159	0.895463	1.31065	0.390277	insig
MW0169544	omega-Aminoarginine	Amino acids and derivatives	Amino acids and derivatives	C6H15N5O2	3	0.6638	57444-72-1	28785	20741.1	19138.2	21047.6	19607.6	19267	0.600604	0.432688	0.584064	1.14589	0.196468	insig
MW0140705	(-)-Berbine	Alkaloids	Alkaloids	C17H17N	3	0.6637	131-10-2	3748.38	4284.89	2782.81	1126.53	1315.98	1673.16	1.32546	0.0255946	0.0844496	2.62802	1.39398	up
MW0151762	Ipolamiide	Heterocyclic compounds	Heterocyclic compounds	C17H26O11	3	0.6633	27934-98-1	4986.27	4604.74	3357.54	6446.49	9228.11	6931.27	1.21489	0.0433887	0.121488	0.572796	-0.803907	insig
MW0137868	Daphnin	Lignans and Coumarins	Coumarins	C15H16O9	3	0.6632	486-55-5	322.58	54.03	201.1	268.96	208.24	350.37	0.646574	0.412312	0.569151	0.69808	-0.518536	insig
MW0110425	Val-Thr	Amino acids and derivatives	Amino acids and derivatives	C9H18N2O4	3	0.6625	72636-02-3	16126.4	18702.2	1141.07	81294.3	67658.5	60148.4	1.10024	0.00233538	0.0178001	0.172021	-2.53935	down
MW0007508	Liranaftate	Benzene and substituted derivatives	Benzene and substituted derivatives	C18H20N2O2S	3	0.662	88678-31-3	1333.28	980.95	702.2	1503.78	1706.24	997.25	0.802778	0.229164	0.391024	0.716957	-0.480042	insig
MW0143663	5-Methylthiopentanaldoxime	Alcohol and amines	Alcohols	C6H13NOS	3	0.6613	32377-75-6	19555.5	17563.3	19652.4	16995.3	18352.3	17057.8	0.937549	0.159239	0.308056	1.08331	0.115443	insig
MW0001477	1-[(4-Dimethylaminophenyl)methylamino]propan-2-ol	Benzene and substituted derivatives	Benzene and substituted derivatives	C12H20N2O	3	0.6612	7467-44-9	4350.22	820.79	1604.27	7868.5	6308.44	3215.34	0.995958	0.115204	0.246814	0.389557	-1.36009	insig
MW0000797	(R)-Benzyl 2-hydroxy-2-phenylacetate	Benzene and substituted derivatives	Benzene and substituted derivatives	C15H14O3	3	0.6612	97415-09-3	73434.3	73118.5	63250.5	60242.6	51966.3	60763.4	1.13532	0.050472	0.134543	1.21293	0.278495	insig
MW0105602	Amastatin	Amino acids and derivatives	Amino acids and derivatives	C21H38N4O8	3	0.6598	67655-94-1	48953.2	52097	43753.9	19985.7	18178.5	21333.8	1.39009	0.00326596	0.0217659	2.43376	1.28319	up
MW0137756	Tricoumaroyl spermidine	Heterocyclic compounds	Heterocyclic compounds	C34H37N3O6	3	0.6597	131086-78-7 | 364368-18-3	9880.31	12581.2	16302.6	19789.6	10848.1	25908.7	0.69677	0.30952	0.477241	0.685527	-0.544716	insig
MW0147227	Cascaroside B	Steroids	Steroid	C27H32O14	3	0.6594	53861-34-0	184419	195705	405307	167953	131899	161046	0.93594	0.269602	0.438852	1.70413	0.769039	insig
MW0104891	3-(Methylsulfonyl)propyl methanesulfonate	Organic acids	Organic acids	C5H12O5S2	3	0.6586	357913-53-2	15300.4	42618.1	12478.2	5209.39	6610.28	8681.84	1.13119	0.224684	0.385992	3.43373	1.77978	up
MW0143733	6-(Isopropylthio)purine	Heterocyclic compounds	Heterocyclic compounds	C8H10N4S	3	0.6585	5443-87-8	16418	20322.5	11677.2	28892.8	15245.8	31496.2	0.848877	0.207394	0.366655	0.640152	-0.643513	insig
MW0012411	15(S)-Hpepe	Lipids	Free fatty acids	C20H30O4	3	0.658	125992-60-1	3695.84	3595.94	3123.94	2104.85	1243.19	1170.79	1.28424	0.00893902	0.0413802	2.30496	1.20474	up
MW0005061	4-Hydroxy-3-methoxyphenylacetone	Phenolic acids	Phenolic acids	C10H12O3	3	0.6547	2503-46-0	25747.7	30955.3	29269	34252.4	32427.1	31082	1.02572	0.107981	0.23609	0.879405	-0.1854	insig
MW0012312	9s,13r-12-Oxophytodienoic Acid	Lipids	Free fatty acids	C18H28O3	3	0.6546	71606-07-0 | 67204-66-4	34300.8	32894.1	38669.1	6488.34	2290.82	6209.83	1.33378	0.000231461	0.00471039	7.06279	2.82024	up
MW0138962	Micromelin	Others	Lactones	C15H12O6	3	0.6534	15085-71-9	659.86	85.98	618.89	368.14	186.65	248.37	0.238154	0.420428	0.574681	1.6992	0.764856	insig
Lmmn001294	Koaburaside	Phenolic acids	Phenolic acids	C14H20O9	3	0.6526	41653-73-0	2615.41	4661.29	4711.24	2973.12	5082.11	4061.64	0.0606066	0.965036	0.978382	0.989359	-0.0154333	insig
MW0007415	Isofenphos-methyl	Benzene and substituted derivatives	Benzene and substituted derivatives	C14H22NO4PS	3	0.6525	99675-03-3 | 83542-84-1	9268.58	7388.58	9841.14	8552.59	8300.63	7020.9	0.598665	0.385312	0.546851	1.10992	0.150452	insig
MW0157031	Ser-Tyr	Amino acids and derivatives	Amino acids and derivatives	C12H16N2O5	3	0.6524	21435-27-8	4181	3913.68	2515.7	14338	16497.3	19758.1	1.36968	0.00836184	0.0398522	0.209718	-2.25348	down
MW0150170	Glu-Thr-Tyr	Amino acids and derivatives	Amino acids and derivatives	C18H25N3O8	3	0.652	110642-78-9	9695.62	5275.63	16567.8	38281.7	31449.7	31682.3	1.24281	0.00621147	0.0327381	0.310994	-1.68504	down
MW0143603	5'-Deoxyinosine	Nucleotides and derivatives	Nucleotides and derivatives	C10H12N4O4	3	0.652	69655-07-8	811.33	3683.74	617.98	410.19	520.57	1524.76	0.547186	0.47283	0.616125	2.08227	1.05816	insig
MW0129649	1,2-di-O-sinapoyl-beta-D-glucose	Phenolic acids	Phenolic acids	C28H32O14	3	0.6514	91095-79-3	22460.5	21398.1	21915	5966.61	12084	9793.65	1.27619	0.0170569	0.0640944	2.3622	1.24013	up
FDATN01334	Dioxybenzone	Benzene and substituted derivatives	Benzene and substituted derivatives	C14H12O4	3	0.6511	131-53-3	1901.1	144.89	3455.37	8960.33	7973.06	7635.29	1.03537	0.0120921	0.0505761	0.223918	-2.15896	down
MW0138085	Epimedin C	Flavonoids	Flavonols	C39H50O19	3	0.651	110642-44-9	6797.35	3560.12	7246.46	3603.46	3604.24	3853.39	0.950169	0.200588	0.359294	1.59152	0.670404	insig
MW0152116	Lankamycin	Heterocyclic compounds	Heterocyclic compounds	C42H72O16	3	0.6507	30042-37-6	52658.6	29959.5	41470.6	184028	124318	140279	1.34461	0.0168229	0.06369	0.276598	-1.85414	down
MW0124613	Kadsurin A	Heterocyclic compounds	Heterocyclic compounds	C21H24O6	3	0.6503	99340-07-5	1618.55	478.95	389.48	246.56	1599.14	228.17	0.354253	0.83053	0.884261	1.1992	0.262069	insig
MW0013716	Chimyl alcohol	GL	MG	C19H40O3	3	0.6493	6145-69-3 | 53584-29-5	239395	281074	270264	431650	414610	390288	1.36425	0.00102069	0.0106068	0.639468	-0.645056	insig
MEDP2243	N-(5Z,8Z,11Z,14Z)-5,8,11,14-eicosatetraen-1-yl-4-hydroxybenzamide	Benzene and substituted derivatives	Benzene and substituted derivatives	C27H39NO2	3	0.648	251908-92-6	39003.7	47195	48689.6	59745.6	56515.2	47131.8	0.974697	0.124385	0.259451	0.825547	-0.276579	insig
MW0157343	Tarennoside	Terpenoids	Terpene	C16H22O9	3	0.6467	61081-59-2	885.64	385.78	205.01	333.98	297.51	745.78	0.025781	0.901555	0.935468	1.072	0.100302	insig
MW0140300	(2S)-2-(benzenesulfonamido)-3-[[2-(4-piperidin-4-ylpiperidin-1-yl)-4-propan-2-yl-1,3-thiazole-5-carbonyl]amino]propanoic acid	Benzene and substituted derivatives	Benzene and substituted derivatives	C26H37N5O5S2	3	0.6466	718595-27-8	170.98	238.72	299.52	56.13	197.14	225.55	0.690385	0.304348	0.472441	1.48118	0.56675	insig
MW0151985	Kaempferol 3-O-beta-D-glucosylgalactoside	Flavonoids	Flavonols	C27H30O16	3	0.6465	31512-06-8	1.00515e+07	1.22705e+07	1.11113e+07	1.12493e+07	1.19785e+07	1.06305e+07	0.153145	0.861188	0.906242	0.987447	-0.0182241	insig
MW0142497	Naphthyl-2-methyl-succinic acid	Benzene and substituted derivatives	Benzene and substituted derivatives	C15H14O4	3	0.6461	350044-88-1	5630.4	4898.87	4070.64	6240.96	5142.21	9529.82	0.888495	0.246951	0.412814	0.698126	-0.51844	insig
MW0143168	4-(tert-butyl)phenyl benzoate	Benzene and substituted derivatives	Benzene and substituted derivatives	C17H18O2	3	0.6459	14041-81-7	219162	210750	214129	231529	240785	244684	1.31784	0.0098736	0.044038	0.898247	-0.154816	insig
MEDP2112	2-Phenylbutyramide	Benzene and substituted derivatives	Benzene and substituted derivatives	C10H13NO	3	0.6448	90-26-6	89256.3	96839.7	67534.5	97939.7	89599.3	89676.8	0.567665	0.47007	0.613771	0.914921	-0.128282	insig
MW0168432	1,2-bis(heptanoylthio) Glycerophosphocholine	GP	PC	C22H44NO6PS2	3	0.6443	89019-63-6	423.01	1724.85	330.29	950.75	611.58	295.27	0.12757	0.703487	0.79275	1.33406	0.415824	insig
MW0152120	Lappaconitine	Alkaloids	Terpenoid alkaloids	C32H44N2O8	3	0.6439	32854-75-4	4203.01	4126.8	135.85	87.1	3257.95	4973.27	0.0712285	0.98124	0.987363	1.01771	0.0253304	insig
MW0151244	Hydrocortisone sodium succinate	Others	Lactones	C25H33NaO8	3	0.6439	125-04-2	168.51	12.93	54.68	132.39	108.55	74.88	0.611332	0.634689	0.743266	0.747641	-0.419582	insig
MW0154580	N-Octadecyl-N'-propyl-sulfamide	Alcohol and amines	Amines	C21H46N2O2S	3	0.6432	925891-74-3	20375.7	79458.6	86695.9	112470	107292	94176.8	0.83546	0.174205	0.327305	0.594162	-0.751072	insig
MEDL00354	Gly-Leu-Ala	Amino acids and derivatives	Amino acids and derivatives	C11H21N3O4	3	0.6405	32557-24-7	3169.32	2678.5	3527.5	10604.7	13514.6	16561.4	1.37694	0.0241816	0.080988	0.230461	-2.1174	down
MEDN1520	Aleuritic acid	Lipids	Free fatty acids	C16H32O5	3	0.64	6949-98-0 | 533-87-9 | 18951-77-4	844.22	1728.78	1355.85	2266.56	2097.26	3698.14	1.12133	0.09523	0.213552	0.487332	-1.03702	down
MW0157471	Thalicoside A	Terpenoids	Triterpene	C42H70O14	3	0.6396	93208-45-8	5908.79	2614.3	13148.7	69637.5	77836.4	78203.2	1.32051	9.05043e-05	0.0026443	0.0960299	-3.38037	down
MW0007023	Ethyl 2,4-dihydroxy-6-methylbenzoate	Phenolic acids	Phenolic acids	C10H12O4	3	0.6395	2524-37-0	1.43554e+06	1.61682e+06	1.60997e+06	1.31472e+06	1.56579e+06	1.56887e+06	0.46144	0.532647	0.664696	1.04786	0.0674454	insig
MW0116539	1,2-Benzisothiazol-3-amine 1,1-dioxide	Benzene and substituted derivatives	Benzene and substituted derivatives	C7H6N2O2S	3	0.6395	7668-28-2	3597.02	4674.65	2956.17	4210.73	4671.49	3985.44	0.668063	0.395652	0.555902	0.872563	-0.196669	insig
MW0141981	2,3,6-Trihydroxypyridine	Alkaloids	Pyridine alkaloids	C5H5NO3	3	0.6389	39954-19-3	399417	376782	372928	282326	286287	283333	1.39202	0.00604449	0.0321513	1.34883	0.431703	insig
MW0143363	3,4-Dihydroxybenzyl alcohol	Phenolic acids	Phenolic acids	C7H8O3	3	0.6387	3897-89-0	35002.1	34746.9	31308.5	2249.62	1834.48	1999.6	1.405	0.00128128	0.0121271	16.6112	4.05408	up
MW0147037	Cammaconine	Alkaloids	Terpenoid alkaloids	C23H37NO5	3	0.6364	32152-70-8	84991.4	68988.8	59027.8	70940	85906.9	67286.2	0.301073	0.716703	0.801594	0.950364	-0.0734477	insig
MW0108481	N-(tert-Butoxycarbonyl)-L-leucine	Amino acids and derivatives	Amino acids and derivatives	C11H21NO4	3	0.6362	13139-15-6 | 53296-34-7	165571	175234	185313	229314	205363	223327	1.29913	0.00989206	0.0440716	0.799566	-0.322711	insig
MW0008027	N-(2-Ethoxyphenyl)naphthalene-2-carboxamide	Benzene and substituted derivatives	Benzene and substituted derivatives	C19H17NO2	3	0.636	4711-67-5	35816.6	14722.3	36836.8	38079.5	17216.8	34126.7	0.0858287	0.946994	0.968861	0.977106	-0.0334134	insig
MW0107779	Leu-Asn	Amino acids and derivatives	Amino acids and derivatives	C10H19N3O4	3	0.6355	14608-81-2	863.03	120.15	1523.39	16427.7	13817.2	15271	1.27679	0.000411775	0.00631285	0.0550703	-4.18258	down
MW0154811	Oxolucidine B	Heterocyclic compounds	Heterocyclic compounds	C30H49N3O2	3	0.6355	71384-25-3	46152.8	43838.2	47287.3	13658.6	11258.8	10723.5	1.3975	1.72079e-05	0.00128486	3.8517	1.9455	up
MW0117507	2-(3,5-dimethyl-1H-pyrazol-1-yl)acetohydrazide	Alcohol and amines	Amines	C7H12N4O	3	0.634	64019-58-5	165.68	607.41	459.76	3395.02	543.81	561.98	0.821131	0.369038	0.532746	0.273917	-1.86819	insig
MW0115421	Triethylene glycol	Alcohol and amines	Alcohols	C6H14O4	3	0.6338	112-27-6 | 119438-10-7 | 103734-98-1 | 122784-99-0 | 137800-98-7 | 145112-98-7	27.51	168.67	122.22	14.22	257.08	10.5	0.507778	0.902494	0.935679	1.12988	0.176169	insig
MW0154259	Nagilactone C	Terpenoids	Terpene	C19H22O7	3	0.6328	24338-53-2	53873.4	50204.7	54088	58393.3	57677	54511.8	1.07295	0.0757413	0.181025	0.927214	-0.109025	insig
MW0005909	9,10-Phenanthrenequinone	Benzene and substituted derivatives	Benzene and substituted derivatives	C14H8O2	3	0.6326	84-11-7	93856	99694.7	76571.6	89268.9	106441	72792.6	0.0605836	0.966311	0.978686	1.00603	0.00867798	insig
MW0142666	Anhydrovinblastine	Alkaloids	Plumerane	C46H56N4O8	3	0.6326	38390-45-3	1170.33	881.55	119.06	97.69	102.02	135.85	1.01105	0.190167	0.347138	6.4696	2.69368	up
MW0061611	Phorbol 12-myristate 13-acetate	Heterocyclic compounds	Heterocyclic compounds	C36H56O8	3	0.6316	16561-29-8 | 11016-13-0	597.43	4573.74	5450.42	442.66	454.62	10232.5	0.357217	0.965491	0.978535	0.954337	-0.0674292	insig
MW0160125	Bisucaberin	Others	Ketone compounds	C18H32N4O6	3	0.6306	112972-60-8	34311.3	33556.1	31811.4	34303.2	29789.5	26055.5	0.7602	0.313263	0.480439	1.10572	0.144986	insig
MW0011993	10-Deacetylbaccatin III	Benzene and substituted derivatives	Benzene and substituted derivatives	C29H36O10	3	0.6303	32981-86-5	26356.3	27710.5	27026.1	7004.59	5149.68	2238.85	1.31795	0.0021904	0.0172619	5.63414	2.4942	up
MW0006091	Atipamezole	Benzene and substituted derivatives	Benzene and substituted derivatives	C14H16N2	3	0.6302	104054-27-5 | 308081-08-5	1032.97	1904.14	2197.26	785.11	1514.42	445.12	0.897429	0.166729	0.317849	1.87068	0.903565	insig
MW0168623	4-phenyl-5-methyl-1,2,3-Thiadiazole	Benzene and substituted derivatives	Benzene and substituted derivatives	C9H8N2S	3	0.63	64273-28-5	3667.04	2049.47	2830.99	775.26	1958.73	1107.57	1.12494	0.0595733	0.152605	2.22501	1.15381	up
MEDP1218	3-Amino-2-naphthoic acid	Alkaloids	Alkaloids	C11H9NO2	3	0.6292	5959-52-4	73663.6	65589.7	64328.1	48388.4	48543.2	31395.8	1.19018	0.0297302	0.0934312	1.58642	0.665775	insig
MW0008211	N-(3-hydroxyphenyl)-Arachidonoyl amide	Benzene and substituted derivatives	Benzene and substituted derivatives	C26H37NO2	3	0.6292	183718-75-4	543.55	306.22	341.01	701.97	305.78	2555.05	0.713514	0.372141	0.535883	0.334226	-1.5811	insig
MW0155063	Phaseic acid	Terpenoids	Sesquiterpenoids	C15H20O5	3	0.6278	24394-14-7	50273.4	51510.8	50067.6	98926.9	86774.3	87021.8	1.39128	0.00909044	0.0418409	0.556798	-0.844773	insig
MW0126007	Oxolinic acid	Organic acids	Organic acids	C13H11NO5	3	0.6261	14698-29-4	234.58	240.12	212.42	1050.48	1156.39	676.36	1.36806	0.0369661	0.109226	0.238316	-2.06905	down
MW0105376	7-Aminodesacetoxycephalosporanic acid	Organic acids	Organic acids	C8H10N2O3S	3	0.6258	22252-43-3 | 70287-30-8	11313.5	5678.6	16698	102663	141113	109815	1.35773	0.00838311	0.0399064	0.0952798	-3.39169	down
MW0000065	16-Hydroxytabersonine	Alkaloids	Plumerane	C21H24N2O3	3	0.6257	22149-28-6	216.41	1503.48	1574.38	1776.16	67.15	2841.9	0.0714648	0.648248	0.752805	0.703121	-0.508155	insig
MW0142444	2-Isoprenylemodin	Benzene and substituted derivatives	Benzene and substituted derivatives	C20H18O5	3	0.6242	82345-58-2	2703.01	3212.54	3316.75	103.79	510.62	756.97	1.22992	0.000619824	0.00814049	6.73212	2.75106	up
MW0053847	Hellebrin	Heterocyclic compounds	Heterocyclic compounds	C36H52O15	3	0.6237	13289-18-4	10259.2	7339.58	8937.25	9684.22	20534.8	18391.8	1.04498	0.149912	0.296007	0.545887	-0.873326	insig
MW0000810	1,1'-Bi-2-naphthol	Benzene and substituted derivatives	Benzene and substituted derivatives	C20H14O2	3	0.6232	18531-94-7 | 602-09-5 | 18531-99-2	73629.3	91564.4	93638.3	125404	121897	81716.3	0.822085	0.232398	0.393876	0.786682	-0.346148	insig
MW0104847	(2S)-2-amino-4-phosphonobutanoic acid	Organic acids	Organic acids	C4H10NO5P	3	0.6232	23052-81-5 | 145236-29-9	2.18286e+06	2.1094e+06	2.14238e+06	3.18437e+06	2.7234e+06	2.69901e+06	1.31621	0.0422321	0.119327	0.747625	-0.419614	insig
MW0144897	all-trans-Nonaprenyl diphosphate	Organic acids	Organic acids	C45H76O7P2	3	0.6228	60037-55-0	941.39	1879.59	3237.35	2823.63	3732.73	8045.43	0.965323	0.212035	0.372321	0.414903	-1.26915	insig
MW0159309	Vasicinol	Alcohol and amines	Alcohols	C11H12N2O2	3	0.6226	5081-51-6	8220.99	7286.78	4559.36	148.71	41.91	429.72	1.3226	0.0264383	0.0863153	32.3486	5.01563	up
MEDL00977	(E,Z)-2-Amino-3,14-octadecadien-1-ol	Alcohol and amines	Alcohols	C18H35NO	3	0.6221	158507-68-7	104003	97776.7	99057.6	119510	118768	232672	0.930869	0.27261	0.440719	0.638788	-0.64659	insig
MW0016281	N-octanoylsphingosine 1-phosphate	Organic acids	Organic acids	C26H52NO6P	3	0.6221	158983-53-0	459238	438553	419642	905903	854544	873257	1.40129	3.51184e-05	0.00176161	0.500221	-0.999364	insig
MW0001943	2-(4-Methoxyphenoxy)aniline	Benzene and substituted derivatives	Benzene and substituted derivatives	C13H13NO2	3	0.6217	105901-39-1	11838.8	12295.5	13517.5	15642.1	13760.5	15062.2	1.17544	0.0392097	0.113711	0.846776	-0.239947	insig
MW0123638	Diethyl pyridine-2,4-dicarboxylate	Others	Lactones	C11H13NO4	3	0.6209	41438-38-4	1904.39	750.34	1377.82	9454.99	10001	6337.86	1.33872	0.0174782	0.0650711	0.156338	-2.67726	down
MW0016353	Cannabigerol	Phenolic acids	Phenolic acids	C21H32O2	3	0.6209	25654-31-3 | 2808-33-5	13376.7	12803.3	12199.6	13692.5	12822.8	15375.1	0.821427	0.256434	0.423649	0.916189	-0.126282	insig
MW0125626	N-Acetyl-L-tryptophanamide	Alcohol and amines	Amines	C13H15N3O2	3	0.6203	2382-79-8	49.12	843.33	566.33	623.81	739.04	880.28	0.659159	0.380098	0.542881	0.650332	-0.620751	insig
MEDP2103	4-Hydroxy-3-methylbenzaldehyde	Benzene and substituted derivatives	Benzene and substituted derivatives	C8H8O2	3	0.6195	15174-69-3	292178	305110	310204	178116	178593	166647	1.3991	8.2266e-05	0.00257855	1.73399	0.794091	insig
MW0054697	Medicagenic acid	Terpenoids	Triterpene	C30H46O6	3	0.6195	599-07-5	46362.6	23317.4	6795.32	73723.7	25740.3	89334.5	0.856885	0.18424	0.340288	0.405063	-1.30378	insig
MW0063788	Tetracosanal	FA	Others	C24H48O	3	0.619	57866-08-7	424.91	2538.19	805.48	5387.96	1561.91	32922.2	0.960199	0.34721	0.513551	0.0945167	-3.40329	insig
MW0137269	Apiosylskimmin	Lignans and Coumarins	Coumarins	C20H24O12	3	0.6188	103529-94-8	118.09	116.47	227.09	72.83	24.8	238.86	0.606905	0.612618	0.725018	1.37196	0.456236	insig
MW0147048	Candimine	Alkaloids	Pyrrole alkaloids	C18H19NO6	3	0.6184	24585-19-1	43615.4	42340.7	44663.4	81560.8	86370.2	84874.5	1.40331	0.000179334	0.0039949	0.51668	-0.952657	insig
MEDP2063	2-Hydroxyethyl salicylate	Benzene and substituted derivatives	Benzene and substituted derivatives	C9H10O4	3	0.6179	87-28-5	91402.9	48627.9	82001.9	155370	157962	101809	1.12358	0.0514883	0.136579	0.534838	-0.902826	insig
MW0004624	4-amino-5-(phenoxymethyl)-4H-1,2,4-triazole-3-thiol	Phenolic acids	Phenolic acids	C9H10N4OS	3	0.6173	4461-15-8	9921.81	8635.6	9681.9	5574.03	5196.21	2619.28	1.1983	0.0206365	0.0726692	2.10906	1.0766	up
MW0156178	Pseudopurpurin	Quinones	Quinones	C15H8O7	3	0.6171	476-41-5	1780.04	1759.17	3885.62	43513.4	33726.2	40503.1	1.38136	0.00420925	0.0257537	0.0630598	-3.98714	down
MW0113098	4'-Methoxy-alpha-pyrrolidinopropiophenone	Others	Ketone compounds	C14H19NO2	3	0.615	478243-09-3	2084.5	1108.32	1147.64	1636.3	971.8	317.29	0.653511	0.397651	0.55768	1.48372	0.569219	insig
MW0118667	2-Mercaptonicotinonitrile	Heterocyclic compounds	Heterocyclic compounds	C6H4N2S	3	0.6149	52505-45-0	3713.51	3203.34	4064.56	4298.7	2541.67	2575.85	0.611001	0.47504	0.617564	1.16622	0.221843	insig
MW0145587	Arg-Gly-Asp-Cys	Amino acids and derivatives	Amino acids and derivatives	C15H27N7O7S	3	0.6142	109292-46-8	70561.1	68370.9	66042.1	48822.4	44727.8	51975.9	1.35582	0.00269197	0.0193132	1.4085	0.494163	insig
MW0133087	3-Hydroxy-3',4'-dimethoxyflavone	Flavonoids	Flavones	C17H14O5	3	0.6139	6889-80-1	60667.9	59414	64018	43544.6	41270.8	15000.9	1.00863	0.0887365	0.203866	1.84439	0.883142	insig
MW0016351	Cannabidiol dimethyl ether	Benzene and substituted derivatives	Benzene and substituted derivatives	C23H34O2	3	0.6123	1242-67-7	49461	60230.2	51148	44127.4	33595.6	38871.6	1.19815	0.0313984	0.0967916	1.37947	0.464118	insig
MW0152529	Leu-Trp-Met	Amino acids and derivatives	Amino acids and derivatives	C22H32N4O4S1	3	0.6101	55023-99-9	21491.4	11800.9	6374.58	27654	22527.9	22878.8	1.0034	0.114917	0.24633	0.542929	-0.881165	insig
MW0124060	Ethyl 2-amino-4-methylthiazole-5-carboxylate	Others	Lactones	C7H10N2O2S	3	0.6067	7210-76-6	1.25764e+06	1.27706e+06	1.28554e+06	1.71747e+06	1.7557e+06	1.63301e+06	1.39031	0.00515307	0.0291405	0.748159	-0.418583	insig
MW0110856	5-[(2-Methoxyethyl)amino]-1,3,4-thiadiazole-2-thiol	Others	Ketone compounds	C5H9N3OS2	3	0.6066	731776-65-1	13776.8	13760.7	13116.3	1443.99	3339.01	1870.43	1.36017	0.000853291	0.00963778	6.11022	2.61122	up
MW0010655	Secoisolariciresinol diglucoside	Lignans and Coumarins	Lignans	C32H46O16	3	0.6039	158932-33-3 | 148244-82-0	2036.84	1658.33	1014.77	6776.58	42.92	5459.24	0.106917	0.345056	0.511401	0.383585	-1.38238	insig
MW0008811	Nafadotride	Benzene and substituted derivatives	Benzene and substituted derivatives	C22H27N3O2	3	0.6026	149649-22-9	44309.8	16694.6	48773.9	65940	60201.4	69791	0.987078	0.0941989	0.212492	0.560287	-0.835763	insig
MW0000313	Lampranthin II	Heterocyclic compounds	Heterocyclic compounds	C34H34N2O16	3	0.602	32074-65-0	27811.3	81.42	33327.1	202.48	18205.8	80.74	0.472311	0.312477	0.479599	3.31115	1.72733	insig
MW0155503	Philanthotoxin	Alcohol and amines	Polyamines	C23H41N5O3	3	0.6018	115976-91-5	4629.03	7313.66	4100.01	6936.31	4654.84	9765.19	0.622052	0.383764	0.546375	0.751191	-0.412747	insig
MW0169670	11,12-Methyleneoctadecanoic acid	Organic acids	Organic acids	C19H36O2	3	0.6013	503-06-0	198.18	9006.7	3879.19	5005.46	709.01	1610.59	0.0347146	0.551672	0.675271	1.78621	0.836899	insig
MW0169578	N-tetradecanoyl-L-Homoserine Lactone	Amino acids and derivatives	Amino acids and derivatives	C18H33NO3	3	0.6003	202284-87-5	639.18	195.12	219.58	352.56	348.9	675.24	0.549393	0.584918	0.701275	0.765512	-0.385504	insig
MW0114021	Buphedrone	Others	Ketone compounds	C11H15NO	3	0.5974	408332-79-6	7093.24	4850.64	5711.52	17720	12701.2	19558.2	1.33636	0.0255048	0.0843429	0.353253	-1.50123	down
MW0156568	Scilliroside	Steroids	Cardiac glycoside	C32H44O12	3	0.5973	507-60-8	1318.56	1805.89	1697.13	4391.4	5308.44	760.95	0.516436	0.308018	0.476383	0.460919	-1.11741	insig
MW0139323	Peucedanin	Lignans and Coumarins	Coumarins	C15H14O4	3	0.5973	133-26-6	26904.3	30815.7	30253.8	51665.8	49014.1	49805.1	1.38729	0.000358378	0.00597772	0.584601	-0.774475	insig
MW0151766	Iresinin I	Alkaloids	Alkaloids	C36H42N2O23	3	0.597	78413-55-5	28474.6	17455.3	43546.5	26453	24709.9	14393.9	0.549336	0.416266	0.573219	1.36487	0.448761	insig
MW0009134	N-Nitrosodiphenylamine	Benzene and substituted derivatives	Benzene and substituted derivatives	C12H10N2O	3	0.597	86-30-6 | 382165-80-2	174.66	540.34	284.55	367.25	272.73	376.36	0.228383	0.964451	0.978382	0.98348	-0.0240325	insig
MW0108511	N-[(3s)-2-Oxotetrahydrofuran-3-Yl]butanamide	Others	Lactones	C8H13NO3	3	0.5964	67605-85-0	1269.27	891.59	655.92	1349.3	2846.57	1040.49	0.869399	0.282569	0.450802	0.537927	-0.894517	insig
MW0155624	Plicatic acid	Lignans and Coumarins	Lignans	C20H22O10	3	0.5952	16462-65-0	18253.7	14795	7235.79	15134	12840.5	8686.01	0.104187	0.767849	0.840249	1.09885	0.136	insig
MW0124325	Huperzine b	Alkaloids	Alkaloids	C16H20N2O	3	0.5944	103548-82-9	3448.97	6319.05	7991.82	10867.6	4064.34	1103.29	0.402595	0.868818	0.911073	1.10755	0.147371	insig
MW0153467	Mercaptoacetyl-Phe-Leu	Amino acids and derivatives	Amino acids and derivatives	C17H24N2O4S	3	0.5937	83328-02-3	50844	49585.1	52784.7	38813.8	35953.8	39185.4	1.37353	0.000721529	0.00900462	1.34453	0.427107	insig
MW0150721	Cauloside A	Terpenoids	Triterpene Saponin	C35H56O8	3	0.5931	17184-21-3	9297.27	2424.23	8104.88	15859.1	13561.4	9611.63	0.938779	0.0854581	0.198141	0.50795	-0.977243	insig
MW0150456	Gly-Phe-Met	Amino acids and derivatives	Amino acids and derivatives	C16H23N3O4S1	3	0.5915	72072-08-3	24728.9	25155.5	25119.2	42543.1	42016.9	45619.6	1.40038	0.00331992	0.0219082	0.576156	-0.795469	insig
MW0156387	Rhodoxanthin	Terpenoids	Terpene	C40H50O2	3	0.5897	116-30-3	1754.46	1625.84	720.18	1413.18	1124.67	228.23	0.577455	0.40953	0.567236	1.48242	0.56795	insig
MW0152148	Latrunculin a	Heterocyclic compounds	Heterocyclic compounds	C22H31NO5S	3	0.5882	76343-93-6	3661.88	2742.58	3841.72	1879.26	3602.16	1752.77	0.864806	0.235038	0.397182	1.41635	0.502183	insig
MW0008767	N1,N2-di(pyridin-2-yl)benzene-1,2-diamine	Benzene and substituted derivatives	Benzene and substituted derivatives	C16H14N4	3	0.5871	300818-11-5	1759.16	1980.97	1215.83	369.8	2976.38	2614.59	0.132779	0.725926	0.808943	0.831429	-0.266334	insig
MW0143457	Isonicotinamidoxime	Benzene and substituted derivatives	Benzene and substituted derivatives	C6H7N3O	3	0.5865	1594-57-6 | 849833-58-5	172.38	122.87	192.44	339.04	41.37	94.34	0.401435	0.96722	0.978873	1.02726	0.0387964	insig
MW0150632	Gradolide	Others	Lactones	C25H34O7	3	0.5864	68852-48-2	100328	62552.5	47224.8	29390.2	44139	19644.4	1.10645	0.116719	0.249132	2.25499	1.17312	up
MW0055248	N-Arachidonoyl Taurine	Lipids	Free fatty acids	C22H37NO4S	3	0.5842	119959-65-8	4499.86	349.39	4814.55	129.78	33.56	352.76	1.11104	0.167658	0.319186	18.7247	4.22687	up
MW0154937	Patellamide C	Alcohol and amines	Amines	C37H46N8O6S2	3	0.5835	81120-74-3	30190	21534.2	27591.1	42844.7	40125.9	37106	1.25041	0.015914	0.0615198	0.660539	-0.598284	insig
MW0169580	N-undecanoyl-L-Homoserine lactone	Others	Lactones	C15H27NO3	3	0.5824	216596-71-3	58747.9	61286.4	56188	12274.6	12866.3	18131.6	1.38552	7.06267e-05	0.00237207	4.07239	2.02588	up
MW0110745	2-Hexadecanoylthio-1-ethylphosphorylcholine	Organic acids	Organic acids	C23H48NO5PS	3	0.5821	60793-01-3	121.28	233.6	423.09	690.46	24.87	2023.31	0.180667	0.381777	0.544123	0.284072	-1.81567	insig
MW0151988	Kalbreclasine	Alkaloids	Alkaloids	C20H23NO12	3	0.5812	98900-01-7	758.91	311.46	853.98	497.47	2877.02	2144.85	0.821429	0.226705	0.388439	0.348656	-1.52012	insig
MW0139321	Petunidin-3-(p-coumaroyl)-rutinoside-5-glucoside	Flavonoids	Anthocyanidins	C43H49O23+	3	0.581	106863-71-2	265.74	943.17	2325.02	187.3	94.62	169.92	1.12184	0.231874	0.393616	7.8212	2.96739	up
MW0161646	6-Deoxotyphasterol	Others	Lactones	C28H50O3	3	0.5793	164034-47-3	14405.6	54845.3	53355	81064.2	99591.4	82055.7	1.00828	0.0540358	0.142214	0.466695	-1.09945	down
MW0148158	D-Apiitol	Alcohol and amines	Alcohols	C5H12O5	3	0.5791	10592-17-3	5720.07	9373.86	10173.1	13999.4	12714.9	8482.01	0.820472	0.20249	0.36046	0.717892	-0.478162	insig
MW0000452	Strychnine	Alkaloids	Alkaloids	C21H22N2O2	3	0.579	57-24-9	25242.8	18543.1	22837.4	44234.4	42942	46828.7	1.35924	0.00161564	0.0138627	0.49717	-1.00819	down
Hmsn000210	methyl (7E,10E)-hexadeca-7,10-dienoate	Lipids	Free fatty acids	C17H30O2	3	0.5761	16106-03-9	27403.1	33687.2	34729.2	37319.6	39869	56525.5	1.03147	0.160099	0.308862	0.7166	-0.48076	insig
MW0143911	7,4'-Dihydroxy-8-methylflavan	Heterocyclic compounds	Heterocyclic compounds	C16H16O3	3	0.5748	82925-55-1 | 75412-98-5	12592.4	10608.2	2762.2	10922.4	897.08	2998.97	0.614061	0.43448	0.585113	1.75205	0.809045	insig
MW0052461	Docosyl acetate	FA	Others	C24H48O2	3	0.5717	822-26-4	75958	89562	87708.3	133096	148718	114168	1.29845	0.02719	0.088269	0.639494	-0.644998	insig
MW0116645	1,3-Diazaspiro[4.6]undecane-2,4-dione	Others	Ketone compounds	C9H14N2O2	3	0.5717	707-16-4	4804.78	6791.78	4997.22	3866.49	6140.27	2081.01	0.723263	0.340492	0.507154	1.37277	0.457094	insig
MW0012160	(Z)-hexadec-11-enoic acid	Lipids	Free fatty acids	C16H30O2	3	0.5715	2416-20-8	10440.7	6411.19	13622.2	43136.5	24301.1	49982.4	1.27756	0.0549656	0.14391	0.259531	-1.94602	down
MW0144912	alpha-(p-Methoxyphenyl)-6-methyl-2-pyridineacrylic acid	Phenolic acids	Phenolic acids	C16H15NO3	3	0.5704	23877-48-7	31107.4	28983.8	32973.4	17870.4	17846.3	16359.8	1.38827	0.00252731	0.0185951	1.78707	0.837599	insig
MW0155665	(2S)-4-[(E)-2-(carboxymethylamino)vinyl]-2,3-dihydropyridine-2,6-dicarboxylic acid	Organic acids	Organic acids	C11H12N2O6	3	0.5703	135545-99-2	5986.34	8713.68	12531.4	4751.23	6454.47	10373.4	0.50728	0.497617	0.63695	1.26193	0.335634	insig
MW0107087	H-Gly-Phe-Ser-OH	Amino acids and derivatives	Amino acids and derivatives	C14H19N3O5	3	0.5695	23828-14-0	29272.6	26748.7	27733.7	26364.9	4425.83	22776.2	0.732825	0.276071	0.444005	1.56356	0.644831	insig
MW0110918	Arcaine	Alcohol and amines	Polyamines	C6H16N6	3	0.5686	544-05-8	29428.2	25142.6	25166.9	35628.9	24745.5	29641.6	0.611237	0.39943	0.559591	0.885816	-0.174921	insig
MW0157018	Serpentine (alkaloid)	Alkaloids	Plumerane	C21H20N2O3	3	0.5685	131-07-7	17248.9	11885.4	16613.1	12585.2	22949.1	2400.36	0.507202	0.708807	0.795853	1.20596	0.270177	insig
MW0003251	2-Methylanthraquinone	Benzene and substituted derivatives	Benzene and substituted derivatives	C15H10O2	3	0.5657	84-54-8	22044.3	30244.4	33241.1	2402.13	8853.01	7914.48	1.24127	0.00853176	0.0405183	4.46174	2.15761	up
MW0109829	Thapsigargin	Heterocyclic compounds	Heterocyclic compounds	C34H50O12	3	0.5649	67526-95-8 | 123269-03-4	74122.8	109135	91490.1	181832	202392	138508	1.26122	0.0294239	0.0930883	0.525599	-0.927966	insig
MW0121400	5-cyanofuran-2-carboxylic Acid	Organic acids	Organic acids	C6H3NO3	3	0.5646	212197-74-5	111611	114143	94203.9	124349	125484	131732	1.14992	0.0678995	0.168043	0.838538	-0.254052	insig
MW0151707	Iminoacetic acid	Organic acids	Organic acids	C2H3NO2	3	0.564	4472-12-2	1645.64	22779.8	21335.7	5908.57	17397.8	4104.3	0.154907	0.494722	0.635058	1.66947	0.739387	insig
MW0123384	Clerodin	Heterocyclic compounds	Heterocyclic compounds	C24H34O7	3	0.5631	464-71-1	1277.01	1100.89	1140.27	4801.23	10547.6	4240	1.32601	0.117091	0.249293	0.179601	-2.47713	down
MW0125375	N-(3-phenylpropyl)quinazolin-4-amine	Alcohol and amines	Amines	C17H17N3	3	0.5628	153810-67-4	10331.8	14217	11827.1	7381.05	10841.9	6520.19	1.05023	0.0912288	0.208287	1.47014	0.555954	insig
MW0063313	Reciniferatoxin	Terpenoids	Ditepenoids	C37H40O9	3	0.5616	57444-62-9	847.65	694.44	1638.37	594.73	2555.41	46.88	0.479527	0.995089	0.996728	0.99482	-0.00749233	insig
MW0139669	Schisandrin B	Lignans and Coumarins	Lignans	C23H28O6	3	0.5616	61281-37-6	8964.58	8475.47	9659.3	18546.2	11043.8	13185	1.14169	0.140955	0.28508	0.633532	-0.65851	insig
MW0151663	Ile-Ala	Amino acids and derivatives	Amino acids and derivatives	C9H18N2O3	3	0.5588	24787-73-3	68.27	69.94	1011.58	819.59	935.14	1627.66	0.997901	0.141803	0.285447	0.339934	-1.55667	insig
MW0002507	2-[(4-Nitrophenyl)sulfonyl]benzoic acid	Benzene and substituted derivatives	Benzene and substituted derivatives	C13H9NO6S	3	0.5555	39950-34-0	244092	241161	233584	37002.6	35055.1	31384.3	1.40482	1.03348e-05	0.000952896	6.94918	2.79684	up
MW0120006	Benzoic acid, 4,4'-(3-oxo-1(3H)-isobenzofuranylidene)bis-	Organic acids	Organic acids	C22H14O6	3	0.5518	7535-16-2	1752.6	794.28	1694.68	3592.87	2835.49	4222.58	1.21449	0.015398	0.0603349	0.398233	-1.32831	down
MEDP1359	Asterina 330	Amino acids and derivatives	Amino acids and derivatives	C12H20N2O6	3	0.551	84563-31-5	469.12	2420.89	1225.43	1471.21	3217.37	140.49	0.162851	0.834766	0.886897	0.852222	-0.230699	insig
MW0006095	Methyl 2,4-dihydroxy-3,6-dimethylbenzoate	Benzene and substituted derivatives	Benzene and substituted derivatives	C10H12O4	3	0.5508	4707-47-5 | 91061-32-4	49124.1	65892.1	39873.7	61786.2	49154.5	72604.7	0.612753	0.402436	0.561656	0.843878	-0.244893	insig
MW0156364	Spartein-5-ol	Alkaloids	Alkaloids	C15H26N2O	3	0.5478	2122-29-4	82494.9	72042	40215.3	19847.2	3479.15	23187.6	1.11127	0.0421296	0.119121	4.18696	2.0659	up
MW0162863	3-(Imidazol-4-yl)-2-oxopropyl phosphate(2-)	Organic acids	Organic acids	C6H7N2O5P-2	3	0.5436	99979-59-6	12732.8	14933.1	25220.5	16470.1	12862.2	32651.9	0.243168	0.698989	0.789668	0.853224	-0.229004	insig
MEDP1681	Leu-Gly-Leu	Amino acids and derivatives	Amino acids and derivatives	C14H27N3O4	3	0.542	19408-48-1	61247.2	61157	58735.2	12639.4	5535.9	13884.4	1.33821	0.00125609	0.0120114	5.65007	2.49827	up
MW0011981	10,12-Tricosadiynoic acid	Lipids	Free fatty acids	C23H38O2	3	0.542	66990-30-5	6775.01	11327.7	25475.9	52554.5	39146	48344.9	1.20421	0.0122989	0.0511887	0.311175	-1.6842	down
MW0108480	tert-Butoxycarbonylasparagine	Amino acids and derivatives	Amino acids and derivatives	C9H16N2O5	3	0.5405	7536-55-2	2194.36	3311.08	572.52	1864.65	1366.3	1117.75	0.15968	0.548516	0.673733	1.39765	0.483003	insig
MW0012965	(9Z,12Z)-9,12-Octadecadienoic acid 1-(hydroxymethyl)-2-[(1-oxohexadecyl)oxy]ethyl ester	GL	DG	C37H68O5	3	0.5347	73649-99-7	665.46	10690.6	3959.4	283.65	4065.1	4168.37	0.335851	0.53636	0.667471	1.7982	0.846556	insig
MW0142634	3-(N-Nitrosomethylamino)propionaldehyde	Others	Aldehyde compounds	C4H8N2O2	3	0.5321	85502-23-4	136.51	56.89	18.48	393.89	559.44	99.3	1.02836	0.166113	0.317422	0.201286	-2.31268	down
MEDTP00538	3-Oxo-octanoic acid (2-oxo-tetrahydro-furan-3-YL)-amide	Amino acids and derivatives	Amino acids and derivatives	C12H19NO4	3	0.5287	147795-39-9	40588.8	47290.2	45367.1	38070.8	53285.3	53609	0.406743	0.536087	0.667361	0.919159	-0.121613	insig
MW0001610	1-Hydroxy-4-methylanthraquinone	Benzene and substituted derivatives	Benzene and substituted derivatives	C15H10O3	3	0.5271	645389-64-6	22862	24689.2	26004.2	26770.4	22959.4	23947.2	0.0121154	0.979267	0.985983	0.998351	-0.00238169	insig
MW0000181	Chelidonine	Alkaloids	Isoquinoline alkaloids	C20H19NO5	3	0.527	476-32-4	3963.59	2078.91	3164.83	5297.27	270.61	6378.33	0.231817	0.681185	0.775639	0.770732	-0.375698	insig
MW0146617	(2R,3S)-Methyl 3-benzamido-2-hydroxy-3-phenylpropanoate	Benzene and substituted derivatives	Benzene and substituted derivatives	C17H17NO4	3	0.523	32981-85-4 | 132074-01-2	36745.4	29034.3	31928.8	28944.5	34663.7	31352	0.215011	0.760787	0.836441	1.02894	0.041164	insig
MW0108167	Met-Met-Ala	Amino acids and derivatives	Amino acids and derivatives	C13H25N3O4S2	3	0.5225	14486-08-9	310.76	3534.31	1208.79	4572.63	1035.94	5857.45	0.697399	0.293956	0.46244	0.440768	-1.18191	insig
MW0117716	2-(Methylthio)-6-nitro-1,3-benzothiazole	Benzene and substituted derivatives	Benzene and substituted derivatives	C8H6N2O2S2	3	0.5199	3621-99-6	243891	247957	253324	597217	599995	573549	1.40558	0.000193888	0.00422571	0.420821	-1.24872	down
MW0154569	Nobilin	Terpenoids	Sesquiterpenoids	C20H26O5	3	0.5155	31824-11-0	15705.8	23342	26956.8	1014.88	4103.34	1418.37	1.32221	0.020053	0.0713506	10.0977	3.33596	up
MW0012180	12R-Hete	Lipids	Free fatty acids	C20H32O3	3	0.5106	82337-46-0	14264.8	67148.2	59388.2	161131	507226	285063	1.20773	0.112317	0.242626	0.14768	-2.75945	down
MW0123970	Ethyl 3-isothiocyanato-1H-indole-2-carboxylate	Alkaloids	Plumerane	C12H10N2O2S	3	0.5078	204635-82-5	13095.7	8539.29	12214.7	14955.4	17296.1	40171.2	0.998309	0.248997	0.415453	0.467391	-1.0973	insig
MW0103299	(-)-Neplanocin A	Nucleotides and derivatives	Nucleotides and derivatives	C11H13N5O3	2	0.9509	-	65603.5	66949.8	64936.3	26060.7	23161.5	24270.4	1.40307	6.96265e-06	0.000825688	2.6872	1.4261	up
MW0151334	Ile-Arg-Phe	Amino acids and derivatives	Amino acids and derivatives	C21H34N6O4	2	0.94	-	20114.4	146800	218180	318708	283386	330092	0.919739	0.0803229	0.188222	0.41311	-1.2754	insig
MW0145469	Arg-Phe-Thr	Amino acids and derivatives	Amino acids and derivatives	C19H30N6O5	2	0.9177	-	259.14	603.36	233.01	549.58	412.79	434.79	0.658347	0.495687	0.63569	0.784098	-0.350895	insig
MW0145569	Arg-Val-Phe	Amino acids and derivatives	Amino acids and derivatives	C20H32N6O4	2	0.9152	-	28421.7	27740.5	30557.1	18507.4	48879.1	25109.7	0.0493723	0.85426	0.901669	0.937545	-0.0930409	insig
MW0015228	7-Oxocallitrisic acid, methyl ester	Others	Lactones	C21H28O3	2	0.9127	-	14294	1167.2	7898.1	12102.1	25331	17461.1	0.869446	0.123269	0.258058	0.425534	-1.23265	insig
MW0146019	Asp-Arg-Asp	Amino acids and derivatives	Amino acids and derivatives	C14H24N6O8	2	0.9079	-	1192.63	1104.17	749.87	653.65	1862.07	1483.59	0.388193	0.475745	0.617779	0.761799	-0.392518	insig
MW0157617	Thr-Gln-Tyr	Amino acids and derivatives	Amino acids and derivatives	C18H26N4O7	2	0.9053	-	78.61	4948.62	5449.21	452.61	171.52	1041.11	0.483155	0.226652	0.388439	6.29125	2.65335	insig
MW0144471	Ala-Arg-Glu	Amino acids and derivatives	Amino acids and derivatives	C14H26N6O6	2	0.902	-	173568	154591	157730	153692	133715	139043	1.07805	0.0772208	0.182895	1.13938	0.188249	insig
MW0137174	Dioonflavone	Others	Ketone compounds	C36H30O10	2	0.9002	-	19521.5	15057.9	20583.3	15684.8	14405.3	15491.4	0.94679	0.194952	0.352644	1.2102	0.275245	insig
MW0154729	Oleoyl Ethanolamide-d4	Lipids	Free fatty acids	C20H35D4NO2	2	0.8968	-	3852.61	3917.65	3047.93	59815.1	13222.6	11869.6	1.20953	0.257623	0.425015	0.127412	-2.97243	down
MW0146229	Asp-Phe-Trp	Amino acids and derivatives	Amino acids and derivatives	C24H26N4O6	2	0.8962	-	6415.92	4367.93	6384.16	510.33	1006.57	209.38	1.31407	0.0103628	0.0455149	9.94509	3.31398	up
MW0151081	His-Ser-Leu	Amino acids and derivatives	Amino acids and derivatives	C15H25N5O5	2	0.8813	-	225.15	2191.9	780.82	2653.16	52.13	15972.2	0.222953	0.405298	0.564087	0.171215	-2.54612	insig
MW0149772	Gln-Phe-Asp	Amino acids and derivatives	Amino acids and derivatives	C18H24N4O7	2	0.873	-	4652.83	4739.45	5889.98	242.77	238.01	439.83	1.39114	0.00576758	0.0312561	16.6001	4.05312	up
MW0136684	Dihydrorobustic acid	Organic acids	Organic acids	C22H22O6	2	0.8725	-	69003.1	135138	112999	146985	126102	400635	0.867899	0.308968	0.476732	0.470729	-1.08703	insig
MW0157826	Thr-Trp-Met	Amino acids and derivatives	Amino acids and derivatives	C20H28N4O5S1	2	0.8723	-	132603	139595	139612	71114.2	68309.4	64120.7	1.39993	2.71892e-05	0.00154404	2.02319	1.01663	up
MW0110184	Tyr-Ala-Lys	Amino acids and derivatives	Amino acids and derivatives	C18H28N4O5	2	0.8701	-	511.27	301.05	854.17	51.7	260.34	525.81	0.76781	0.263586	0.431674	1.98901	0.992049	insig
MW0150513	Gly-Tyr-Asp	Amino acids and derivatives	Amino acids and derivatives	C15H19N3O7	2	0.8663	-	1535.66	929.6	1953.23	5714.5	10047.7	8988.53	1.33945	0.0299254	0.0937578	0.17852	-2.48584	down
MW0110180	Tumonoic acid I	Organic acids	Organic acids	C27H47NO7	2	0.8603	-	9250.75	4641.19	16673.4	139682	124356	179451	1.35616	0.0111843	0.0482815	0.0689202	-3.85893	down
MW0058413	1-(9Z-nonadecenoyl)-glycero-3-phosphoethanolamine	GP	PE	C24H48NO7P	2	0.8602	-	15310.1	11343.5	11232.7	16937.5	25822.4	49672	1.08736	0.202025	0.360204	0.409884	-1.28671	down
MW0155999	Pro-Thr-Asn	Amino acids and derivatives	Amino acids and derivatives	C13H22N4O6	2	0.8596	-	19.15	153.64	38.41	42.54	9.1	2.93	0.861831	0.339634	0.506624	3.87026	1.95243	insig
MW0158555	Tyr-Met-Leu	Amino acids and derivatives	Amino acids and derivatives	C20H31N3O5S1	2	0.8522	-	2241.45	110.77	123.44	2255.57	67.57	2111.43	0.352306	0.549525	0.673733	0.558264	-0.840981	insig
MW0145258	Arg-Arg-Asn	Amino acids and derivatives	Amino acids and derivatives	C16H32N10O5	2	0.847	-	38723	44988	40639.3	40584.2	36300	28906.9	0.861386	0.206713	0.365717	1.17543	0.233192	insig
MW0108732	N-Pentadecylcyclohexanecarboxamide	Alcohol and amines	Amines	C22H43NO	2	0.8453	-	7713.9	3.73983e+06	2.99753e+06	866946	3.30868e+06	791915	0.35592	0.697633	0.788798	1.35783	0.441301	insig
MW0110197	Tyr-Glu-Arg	Amino acids and derivatives	Amino acids and derivatives	C20H30N6O7	2	0.8439	-	2661.67	8817.15	3865.31	8272.59	7156.04	2764.95	0.27561	0.726084	0.808943	0.843382	-0.245743	insig
MW0150333	Gly-Asp-Val	Amino acids and derivatives	Amino acids and derivatives	C11H19N3O6	2	0.8424	-	9397.87	5313.06	10868.8	17446.9	13860.3	6082.92	0.555965	0.371919	0.535883	0.684131	-0.547655	insig
MW0155987	Pro-Ser-Asn	Amino acids and derivatives	Amino acids and derivatives	C12H20N4O6	2	0.8389	-	94480.7	85749.6	81505.3	48669.6	49152.5	37597.6	1.34914	0.0014292	0.0129018	1.93277	0.950672	insig
MW0110073	Trp-Lys-Arg	Amino acids and derivatives	Amino acids and derivatives	C23H36N8O4	2	0.8387	-	82923.3	82617.2	80549.4	80857.9	69646.1	78133.7	0.890626	0.223342	0.384507	1.07633	0.106123	insig
MW0155979	Pro-Pro-Leu	Amino acids and derivatives	Amino acids and derivatives	C16H27N3O4	2	0.8362	-	3662.94	4745.67	5098.06	239.88	981.07	1797.68	1.16492	0.00499615	0.0284929	4.47444	2.16171	up
MW0149838	Gln-Tyr-Glu	Amino acids and derivatives	Amino acids and derivatives	C19H26N4O8	2	0.8286	-	6287.86	8030.97	4122.76	18529.5	19635.7	16753.2	1.32549	0.00140552	0.0127924	0.3358	-1.57433	down
MW0158597	Tyr-Ser-Asn	Amino acids and derivatives	Amino acids and derivatives	C16H22N4O7	2	0.8253	-	419458	411671	431102	525584	488887	465364	1.2698	0.0429697	0.120483	0.852954	-0.229461	insig
MW0155304	Phe-Phe-Met	Amino acids and derivatives	Amino acids and derivatives	C23H29N3O4S1	2	0.8156	-	377.96	1673.68	635.08	2043.69	1217.01	2375.35	0.958852	0.135733	0.276822	0.476703	-1.06884	insig
MW0156323	R-4-benzyl-3-((R)-3-hydroxy-2,2-dimethyloctanoyl)-5,5-dimethyloxazolidin-2-one	Benzene and substituted derivatives	Benzene and substituted derivatives	C22H33NO4	2	0.8141	-	172045	203571	208710	137596	171444	137544	1.15138	0.0462332	0.126725	1.30844	0.387843	insig
MW0155193	Phe-Glu-Val-Glu	Amino acids and derivatives	Amino acids and derivatives	C24H34N4O9	2	0.802	-	54769.8	73131.9	42553.2	72690.3	76967.3	76052.6	0.978588	0.171507	0.323138	0.755194	-0.405082	insig
MW0107740	Leu-Leu-Ser	Amino acids and derivatives	Amino acids and derivatives	C15H29N3O5	2	0.8018	-	2637.16	737.82	883.51	271.6	1094.05	752.19	0.716016	0.366782	0.530532	2.01077	1.00775	insig
MW0158210	Trp-Met-Trp	Amino acids and derivatives	Amino acids and derivatives	C27H31N5O4S1	2	0.7979	-	9698.26	10218.5	9649.33	21521.4	19933.4	20529.6	1.40262	0.000514175	0.00743065	0.476992	-1.06796	down
MW0153098	Lys-Phe-Ile	Amino acids and derivatives	Amino acids and derivatives	C21H34N4O4	2	0.7944	-	17988.5	6253.59	2693.69	11605.5	545.74	2311.63	0.612857	0.513122	0.648169	1.8624	0.897165	insig
MW0145529	Arg-Trp-His	Amino acids and derivatives	Amino acids and derivatives	C23H31N9O4	2	0.7922	-	64352.6	11593.9	35860.9	67874.3	71183.9	70597.2	0.907151	0.16524	0.316508	0.533291	-0.907006	insig
MW0151683	Ile-Phe	Amino acids and derivatives	Amino acids and derivatives	C15H22N2O3	2	0.7896	-	1.37741e+06	1.35927e+06	1.42152e+06	2.785e+06	2.72746e+06	2.68638e+06	1.4051	1.12284e-05	0.000984197	0.507169	-0.979461	insig
MW0155305	Phe-Phe-Ser	Amino acids and derivatives	Amino acids and derivatives	C21H25N3O5	2	0.7881	-	54213.6	45734.5	33999.7	20558.8	4774.64	16150.6	1.14485	0.0162763	0.0623823	3.22889	1.69104	up
MW0155308	Phe-Phe-Tyr	Amino acids and derivatives	Amino acids and derivatives	C27H29N3O5	2	0.7834	-	5579.24	6326.7	5609.84	5329.35	3353.68	4580.35	1.01027	0.118225	0.250856	1.32061	0.401207	insig
MW0146105	Asp-Glu-Phe	Amino acids and derivatives	Amino acids and derivatives	C18H23N3O8	2	0.7825	-	1784.15	3032.96	5060.44	9317.76	3537.92	8882.88	0.944981	0.155193	0.30361	0.454379	-1.13803	insig
MW0054336	alpha-L-Fucp-(1->3)-[beta-D-Galp-(1->4)]-D-GlcpNAc	Others	Saccharides	C20H35NO15	2	0.7789	-	10390.6	14393.6	10650.4	13543.9	12338.5	15666.4	0.773488	0.281197	0.449558	0.852843	-0.229648	insig
MW0159245	Val-Val-Thr	Amino acids and derivatives	Amino acids and derivatives	C14H27N3O5	2	0.778	-	288.88	89.74	844.61	259.72	224.92	73.94	0.471411	0.432102	0.583663	2.18989	1.13086	insig
MW0155310	Phe-Pro-Asn	Amino acids and derivatives	Amino acids and derivatives	C18H24N4O5	2	0.7765	-	1660.89	2277.98	336.39	2510.51	494.29	544	0.184482	0.796384	0.859711	1.20471	0.268681	insig
MW0138447	Irigenin, 7-benzyl ether	Flavonoids	Flavones	C25H22O8	2	0.7757	-	4007.11	579.26	5583.14	722.31	1088.16	2596.14	0.505557	0.32432	0.492157	2.30779	1.20651	insig
MW0107916	L-N5-(1-Imino-3-pentenyl) ornithine	Amino acids and derivatives	Amino acids and derivatives	C10H19N3O2	2	0.775	-	49383	47997.3	50284.1	44378.8	46454.5	43304.6	1.25251	0.020094	0.0713506	1.10084	0.138605	insig
MW0052784	(1R,4R,5R,7R,8R,11R,17S,18S)-4,5,7,8,17-pentahydroxy-14,18-dimethyl-6-methylidene-3,10-dioxapentacyclo[9.8.0.01,7.04,19.013,18]nonadec-14-ene-9,16-dione	Others	Ketone compounds	C20H24O9	2	0.7741	-	156285	160015	162270	221948	221926	222171	1.40365	0.000762246	0.00928513	0.718525	-0.476891	insig
MW0107096	Gly-Tyr-Arg	Amino acids and derivatives	Amino acids and derivatives	C17H26N6O5	2	0.7738	-	41278.2	52298.8	59171.8	32022	11988.5	29784.9	1.08269	0.0344189	0.103565	2.0699	1.04956	up
MW0105796	Asn-Tyr-Arg	Amino acids and derivatives	Amino acids and derivatives	C19H29N7O6	2	0.7725	-	33765.3	36557.1	34092.2	42493.6	36677.3	34905.9	0.782113	0.294178	0.462607	0.915302	-0.12768	insig
MW0053732	2,3-Dihydroxypropyl 2-[(octadec-9-enoyl)amino]ethyl hydrogen phosphate	Lipids	Free fatty acids	C23H46NO7P	2	0.7724	-	58413	64888.1	73234.4	65032.9	76089.4	22995.7	0.510447	0.577385	0.69493	1.19753	0.260056	insig
MW0007286	Haematoxylone, tetramethyl-	Heterocyclic compounds	Heterocyclic compounds	C20H20O7	2	0.7719	-	29066.5	29619.3	23473.7	35210.8	30279.6	33614.5	1.04107	0.0873879	0.201803	0.829016	-0.270529	insig
MW0108156	Met-His-Arg	Amino acids and derivatives	Amino acids and derivatives	C17H30N8O4S1	2	0.77	-	10559.3	11122.9	14252.9	9241.5	8944.96	7471.83	1.16071	0.0781359	0.184371	1.40052	0.485966	insig
MW0146284	Asp-Trp-Asp	Amino acids and derivatives	Amino acids and derivatives	C19H22N4O8	2	0.7699	-	35329.1	15680.1	31844.2	8419.8	12944.8	4584.85	1.1714	0.0729717	0.176286	3.19288	1.67486	up
MW0137735	Cosmosiin hexaacetate	Others	Lactones	C33H32O16	2	0.7695	-	21478.5	32437.4	16475.8	27501.2	23849.8	22524.2	0.282068	0.832874	0.885812	0.952848	-0.0696828	insig
MW0146023	Asp-Arg-His	Amino acids and derivatives	Amino acids and derivatives	C16H26N8O6	2	0.7682	-	592.9	39708.8	156.39	106298	96823.9	94215.9	1.09717	0.016865	0.0637897	0.136068	-2.8776	down
MW0130429	2',4'-Dihydroxychalcone 4'-glucoside	Others	Ketone compounds	C21H22O8	2	0.7673	-	19758.1	30837.7	31486.6	42897.7	32079.3	24408.7	0.544599	0.434973	0.585579	0.825896	-0.275967	insig
MW0158906	Val-Arg-Val	Amino acids and derivatives	Amino acids and derivatives	C16H32N6O4	2	0.7656	-	5550.77	16383.9	26651.9	21577.1	44506.7	14819.2	0.650546	0.384258	0.546693	0.600554	-0.735634	insig
MW0110336	Val-Asp-Arg	Amino acids and derivatives	Amino acids and derivatives	C15H28N6O6	2	0.7647	-	1050.7	129.4	89.55	63.33	112.27	141.05	0.647147	0.418186	0.57412	4.00963	2.00347	insig
MW0144451	Ala-Ala-Ala-Arg-Phe	Amino acids and derivatives	Amino acids and derivatives	C24H38N8O6	2	0.7625	-	140446	117037	111618	334301	317584	317357	1.39167	0.000144595	0.00355493	0.380814	-1.39284	down
MW0158417	Tyr-Asp-Ser	Amino acids and derivatives	Amino acids and derivatives	C16H21N3O8	2	0.7623	-	101700	102581	99193.8	65521.4	84899	86170.3	1.15482	0.0760978	0.18136	1.2827	0.359183	insig
MW0109098	Phe-Asp-Cys	Amino acids and derivatives	Amino acids and derivatives	C16H21N3O6S1	2	0.7618	-	2925.35	1074.6	32059.8	253536	270656	391079	1.26407	0.0170354	0.0640733	0.0393979	-4.66574	down
MW0107251	His-Gln-Arg	Amino acids and derivatives	Amino acids and derivatives	C17H29N9O5	2	0.7604	-	145.84	379.9	334.64	659.37	380.85	737.52	1.0215	0.0879906	0.20273	0.483974	-1.047	down
MW0137929	Deoxysappanone B 7,3'-dimethyl ether	Others	Ketone compounds	C18H18O5	2	0.7602	-	25726.3	28365.5	33086.3	45682.7	37850.5	46769.5	1.26207	0.0174756	0.0650711	0.669043	-0.579829	insig
MW0054017	Incensole	Heterocyclic compounds	Heterocyclic compounds	C20H34O2	2	0.7598	-	203297	202308	202806	325334	379077	353938	1.38875	0.0105263	0.0460827	0.574868	-0.798696	insig
MW0151400	Ile-Gln-Met	Amino acids and derivatives	Amino acids and derivatives	C16H30N4O5S1	2	0.7598	-	2974.12	2100.91	1541.54	414.83	1628.89	361.56	1.07563	0.0751863	0.180555	2.75085	1.45988	up
MW0110222	Tyr-Thr	Amino acids and derivatives	Amino acids and derivatives	C13H18N2O5	2	0.7593	-	90168.8	99977.8	86846.5	121468	104970	111936	1.20909	0.0315192	0.0969377	0.818598	-0.288772	insig
MW0149657	Gln-Cys-His	Amino acids and derivatives	Amino acids and derivatives	C14H22N6O5S1	2	0.7593	-	50074	35953.6	58436.4	31655.5	48307.8	78390.3	0.100748	0.780944	0.848038	0.912288	-0.132439	insig
MW0110078	Trp-Phe-Arg	Amino acids and derivatives	Amino acids and derivatives	C26H33N7O4	2	0.7592	-	59170.3	64285.9	73526.9	139114	118183	129884	1.37016	0.00165696	0.0141245	0.508762	-0.974938	insig
MW0153201	Lys-Val-His	Amino acids and derivatives	Amino acids and derivatives	C17H30N6O4	2	0.759	-	1266.6	1988.14	676.95	589.81	1137.34	910.94	0.594866	0.379424	0.542463	1.49035	0.575656	insig
MW0154554	N-methylundec-10-enamide	FA	Others	C12H23NO	2	0.759	-	40031.3	29322	41740.2	424424	417710	414913	1.40097	4.77752e-07	0.000373296	0.0883766	-3.50019	down
MW0107100	Gly-Val-Gln	Amino acids and derivatives	Amino acids and derivatives	C12H22N4O5	2	0.7576	-	12948.2	12743.4	16240.5	10295.7	10685.9	10992.4	1.20264	0.0951459	0.213552	1.31145	0.391158	insig
MW0106908	Glu-Ile-Phe	Amino acids and derivatives	Amino acids and derivatives	C20H29N3O6	2	0.7575	-	18745.2	24891.4	24279.9	30879.1	27130.9	19510.9	0.49195	0.465302	0.608925	0.876105	-0.190824	insig
MW0156989	Ser-Val-Val	Amino acids and derivatives	Amino acids and derivatives	C13H25N3O5	2	0.7575	-	1219.3	174.27	240.71	1867.15	187.89	3176.66	0.616109	0.299551	0.466689	0.31238	-1.67862	insig
MW0151134	His-Tyr-Phe	Amino acids and derivatives	Amino acids and derivatives	C24H27N5O5	2	0.7573	-	66764.3	61214.7	63695.7	67975.7	66667.2	61944.9	0.445356	0.53872	0.668238	0.975008	-0.0365139	insig
MW0153076	Lys-Met-His	Amino acids and derivatives	Amino acids and derivatives	C17H30N6O4S1	2	0.7569	-	181499	171633	173806	44197.1	98056.8	108669	1.15378	0.0413182	0.117735	2.1	1.07039	up
MW0145533	Arg-Trp-Tyr	Amino acids and derivatives	Amino acids and derivatives	C26H33N7O5	2	0.7568	-	1673.76	4226.81	153.91	118.43	12848.2	759.84	0.00712611	0.605369	0.718954	0.441081	-1.18088	insig
MW0145572	Arg-Val-Ser	Amino acids and derivatives	Amino acids and derivatives	C14H28N6O5	2	0.7566	-	219562	192967	202181	69241.5	110682	61971.8	1.31654	0.00541295	0.0299517	2.54122	1.34552	up
MW0158282	Trp-Val-Arg	Amino acids and derivatives	Amino acids and derivatives	C22H33N7O4	2	0.7566	-	1.28391e+06	1.09415e+06	1.15259e+06	1.05201e+06	954737	1.18236e+06	0.778625	0.260518	0.428564	1.1071	0.146781	insig
MW0146333	Asp-Arg	Amino acids and derivatives	Amino acids and derivatives	C10H19N5O5	2	0.7556	-	13632.5	12879.3	13831.1	20965.7	20344.4	17808.7	1.35237	0.01648	0.0628335	0.682405	-0.551301	insig
MW0155767	Pro-Ala-Leu	Amino acids and derivatives	Amino acids and derivatives	C14H25N3O4	2	0.755	-	15441.8	15304.1	17994.7	16636.8	22305	16602.2	0.682007	0.361451	0.526316	0.877513	-0.188508	insig
MW0158563	Tyr-Phe-Asp	Amino acids and derivatives	Amino acids and derivatives	C22H25N3O7	2	0.7539	-	3087.21	292.36	535.1	2080.59	963.17	5689.07	0.726679	0.403415	0.562516	0.44827	-1.15756	insig
MW0149847	Gln-Tyr-Trp	Amino acids and derivatives	Amino acids and derivatives	C25H29N5O6	2	0.7521	-	2.7176e+06	2.8023e+06	2.79551e+06	2.72928e+06	2.65419e+06	2.66128e+06	1.09672	0.0683734	0.168819	1.03364	0.0477399	insig
MW0149854	Gln-Val-Gln	Amino acids and derivatives	Amino acids and derivatives	C15H27N5O6	2	0.7516	-	1356.87	31.9	68.54	75.15	195.6	40.74	0.297078	0.473522	0.616283	4.67851	2.22605	insig
MW0145264	Arg-Arg-Phe	Amino acids and derivatives	Amino acids and derivatives	C21H35N9O4	2	0.7514	-	81975.5	74868.3	83783.3	144914	147754	195318	1.3497	0.0341225	0.10298	0.493101	-1.02004	down
MW0158262	Trp-Trp-Asp	Amino acids and derivatives	Amino acids and derivatives	C26H27N5O6	2	0.7513	-	511.89	29.38	41.54	120.23	152.97	127.79	0.334668	0.739746	0.818736	1.45343	0.539459	insig
MW0109603	Ser-Ala-Lys	Amino acids and derivatives	Amino acids and derivatives	C12H24N4O5	2	0.751	-	39723.8	48283.3	36371.5	56749.6	43348.8	40886.3	0.594501	0.418374	0.57412	0.882214	-0.180799	insig
MW0105574	Propionic acid, 2-amino-3-ureido-	Organic acids	Organic acids	C4H9N3O3	2	0.7508	-	1233.24	103.3	1126.79	931.43	576.62	991.66	0.3588	0.977074	0.985399	0.985446	-0.0211508	insig
MW0144585	Ala-His-Ala	Amino acids and derivatives	Amino acids and derivatives	C12H19N5O4	2	0.7508	-	1788.92	330.09	84.02	355.81	5993.69	4769.32	0.80652	0.218927	0.379661	0.198135	-2.33544	insig
MW0159131	Val-Phe-Tyr	Amino acids and derivatives	Amino acids and derivatives	C23H29N3O5	2	0.7506	-	660.45	184.58	135.21	688.2	1413.47	1507.5	1.13579	0.0560833	0.146172	0.271597	-1.88046	down
MW0150884	His-Cys-Gln	Amino acids and derivatives	Amino acids and derivatives	C14H22N6O5S1	2	0.7505	-	275628	282221	346787	373196	327634	326560	0.857118	0.219301	0.379926	0.880519	-0.183574	insig
MW0151051	His-Phe-Ser	Amino acids and derivatives	Amino acids and derivatives	C18H23N5O5	2	0.7499	-	18561.3	21006.9	18127.2	20910.8	22894.8	20854.2	1.01613	0.112347	0.242626	0.892292	-0.164413	insig
MW0151027	His-Met-Gly	Amino acids and derivatives	Amino acids and derivatives	C13H21N5O4S1	2	0.7496	-	584100	560041	568036	748489	669145	645834	1.25953	0.0573616	0.148639	0.829757	-0.26924	insig
MW0150100	Glu-Phe-Glu	Amino acids and derivatives	Amino acids and derivatives	C19H25N3O8	2	0.749	-	1008.95	3083.86	2817.43	18379.2	7274.68	19097.2	1.25585	0.0770721	0.182754	0.154415	-2.69511	down
MW0144704	Ala-Pro-Ala	Amino acids and derivatives	Amino acids and derivatives	C11H19N3O4	2	0.7487	-	5023.22	3077.79	3697.4	41819.8	44367.7	45153.7	1.39695	3.40631e-05	0.00176161	0.0898302	-3.47665	down
MW0149786	Gln-Phe-Trp	Amino acids and derivatives	Amino acids and derivatives	C25H29N5O5	2	0.7484	-	6.05389e+06	6.55588e+06	6.60048e+06	7.83037e+06	7.55184e+06	7.57768e+06	1.33357	0.00814539	0.039238	0.836687	-0.257239	insig
MW0155758	Pro-Ala-Asn	Amino acids and derivatives	Amino acids and derivatives	C12H20N4O5	2	0.7484	-	362795	451834	367152	215733	230662	239367	1.35254	0.0242615	0.0811805	1.72331	0.785183	insig
MW0048990	[(2R,3R,4S,5R,6S,8S,13S,16S,17R)-11-ethyl-8,16-dihydroxy-6-methoxy-13-(methoxymethyl)-11-azahexacyclo[7.7.2.12,5.01,10.03,8.013,17]nonadecan-4-yl] acetate	Others	Lactones	C25H39NO6	2	0.748	-	238651	313182	249677	272029	265852	281483	0.234045	0.823433	0.879026	0.978209	-0.0317848	insig
MW0153708	Met-Tyr-Tyr	Amino acids and derivatives	Amino acids and derivatives	C23H29N3O6S1	2	0.7479	-	26536.1	2914.31	31172.3	74409	52846.2	80946.9	1.01872	0.0156963	0.0610385	0.291173	-1.78005	down
MW0155156	Phe-Gln-Asn	Amino acids and derivatives	Amino acids and derivatives	C18H25N5O6	2	0.7467	-	3885	133.47	75.63	6152.06	6527.43	6301.94	1.07716	0.0578463	0.149395	0.21569	-2.21297	down
MW0132617	5-Hydroxypseudobaptigenin	Heterocyclic compounds	Heterocyclic compounds	C16H10O6	2	0.7461	-	234.61	75.04	126.34	59.41	17.73	59.41	1.05806	0.159633	0.308524	3.1929	1.67487	up
MW0155190	Phe-Glu-Trp	Amino acids and derivatives	Amino acids and derivatives	C25H28N4O6	2	0.746	-	8677.63	13210.2	13000.6	19917.8	15074.5	18379.3	1.13329	0.0400807	0.115213	0.653689	-0.613323	insig
MW0108727	N-cis-octadec-9Z-enoyl-L-Homoserine lactone	Others	Lactones	C22H39NO3	2	0.7451	-	5287.7	15908.1	3609.88	14978	16893.2	21940.2	1.02098	0.111972	0.242307	0.460976	-1.11724	down
MW0158607	Tyr-Ser-Leu	Amino acids and derivatives	Amino acids and derivatives	C18H27N3O6	2	0.7449	-	2303.11	655.81	5213.04	6952.45	6462.4	4492.34	0.926741	0.119537	0.252607	0.456351	-1.13178	insig
MW0168284	6,9,12,15-Octadecatetraenoic acid methyl ester	FA	Others	C19H30O2	2	0.7447	-	1363.47	484.38	1941.94	5061.58	2409.55	3724.44	1.10512	0.0637008	0.160325	0.338508	-1.56274	down
MW0156905	Ser-Ser-Cys	Amino acids and derivatives	Amino acids and derivatives	C9H17N3O6S1	2	0.7442	-	95348.9	88844.7	87341.4	152559	147759	130490	1.36899	0.00881581	0.0410885	0.630293	-0.665907	insig
MW0155890	Pro-Ile-Asn	Amino acids and derivatives	Amino acids and derivatives	C15H26N4O5	2	0.7433	-	1773.66	3353.19	2964.59	7136.86	636.47	710.81	0.461293	0.957656	0.97498	0.953714	-0.068372	insig
MW0138022	7,3'-Dihydroxy-8,2',4'-trimethoxyisoflavan	Heterocyclic compounds	Heterocyclic compounds	C18H20O6	2	0.7433	-	32448.6	35934.3	26931.5	40132.5	41483	44463.3	1.19141	0.0411239	0.11743	0.755991	-0.40356	insig
MW0146300	Asp-Tyr-Glu	Amino acids and derivatives	Amino acids and derivatives	C18H23N3O9	2	0.7431	-	2631.81	4060.78	7962.99	8296.69	8661.28	5520.23	0.827534	0.249945	0.416438	0.651991	-0.617076	insig
MW0150181	Glu-Tyr-Ala	Amino acids and derivatives	Amino acids and derivatives	C17H23N3O7	2	0.7427	-	10081.5	14117	18229.3	12794.1	8685.63	6767.18	0.889589	0.189386	0.346462	1.50203	0.586916	insig
MW0159158	Val-Ser-His	Amino acids and derivatives	Amino acids and derivatives	C14H23N5O5	2	0.7427	-	106.21	1331.54	37.49	507.93	248.94	26.42	0.0773147	0.646043	0.751108	1.88339	0.913331	insig
MW0146085	Asp-Gln-Met	Amino acids and derivatives	Amino acids and derivatives	C14H24N4O7S1	2	0.7405	-	4169.02	5916.85	5096.21	11874.7	2039.88	7569.01	0.164593	0.539081	0.668238	0.706682	-0.500867	insig
MW0158135	Trp-Gln-Met	Amino acids and derivatives	Amino acids and derivatives	C21H29N5O5S1	2	0.7397	-	42441.8	42684.7	43908.2	29026.6	41528.6	47282.3	0.501405	0.560532	0.682386	1.09502	0.13096	insig
MW0155941	Pro-Met-Glu	Amino acids and derivatives	Amino acids and derivatives	C15H25N3O6S1	2	0.7381	-	1091.56	173.38	118.18	1621.61	2175.96	3362.35	1.15975	0.0429342	0.120483	0.193175	-2.37202	down
MW0155312	Phe-Pro-Cys	Amino acids and derivatives	Amino acids and derivatives	C17H23N3O4S1	2	0.7377	-	10438.7	7991.04	12192.4	9723.27	8946.37	8435.54	0.542112	0.441311	0.589206	1.12975	0.176007	insig
MW0151023	His-Met-Asn	Amino acids and derivatives	Amino acids and derivatives	C15H24N6O5S1	2	0.7375	-	71138.2	152525	164974	178007	136783	166152	0.614646	0.413373	0.570404	0.808076	-0.307437	insig
MW0157746	Thr-Met-Phe	Amino acids and derivatives	Amino acids and derivatives	C18H27N3O5S1	2	0.7371	-	258.33	39.38	171.21	33.14	110.69	242.36	0.193154	0.770191	0.841346	1.21422	0.280031	insig
MW0110224	Tyr-Trp-Lys	Amino acids and derivatives	Amino acids and derivatives	C26H33N5O5	2	0.7371	-	63448.6	67580.3	75537.3	118847	113120	107741	1.37	0.000786294	0.00941463	0.608071	-0.717689	insig
MW0158226	Trp-Pro-Glu	Amino acids and derivatives	Amino acids and derivatives	C21H26N4O6	2	0.7371	-	22584.1	17812.6	29297.7	23027.2	15089.2	18265.6	0.673961	0.341957	0.508719	1.23611	0.305811	insig
MW0156046	Pro-Val-Glu	Amino acids and derivatives	Amino acids and derivatives	C15H25N3O6	2	0.7362	-	24048.2	24656.5	24435	17140.3	17074.4	16679.4	1.40407	8.04638e-06	0.00090481	1.4371	0.523157	insig
MW0145842	Asn-Met-His	Amino acids and derivatives	Amino acids and derivatives	C15H24N6O5S1	2	0.7356	-	10781.7	41650.6	45320.4	49698.4	47776.8	22041.1	0.396878	0.635608	0.744126	0.817903	-0.289998	insig
MW0145939	Asn-Tyr-Tyr	Amino acids and derivatives	Amino acids and derivatives	C22H26N4O7	2	0.7354	-	15825.9	13779.5	13308.7	43194.5	34233.1	30296.5	1.3634	0.0259334	0.0852189	0.398371	-1.32782	down
MW0105680	Arg-Tyr-Arg	Amino acids and derivatives	Amino acids and derivatives	C21H35N9O5	2	0.7354	-	68777.4	65140.2	74455.9	137254	127477	144413	1.38971	0.00105339	0.0108073	0.509291	-0.973438	insig
MW0153668	Met-Ser-Tyr	Amino acids and derivatives	Amino acids and derivatives	C17H25N3O6S1	2	0.7349	-	574.36	241.45	355.86	93.53	43.02	55.49	1.3157	0.0756653	0.181025	6.10118	2.60909	up
MW0117861	2,3-Methylenedioxymethcathinone	Others	Ketone compounds	C11H13NO3	2	0.7346	-	3341.69	3013.77	7028.34	1027.32	6067.34	6383.1	0.205366	0.989182	0.992876	0.993029	-0.0100929	insig
MW0106266	Cys-Pro-Lys	Amino acids and derivatives	Amino acids and derivatives	C14H26N4O4S1	2	0.7342	-	32.17	477.36	80.42	641.81	248.19	93.53	0.555096	0.576551	0.694548	0.599829	-0.737376	insig
MW0114796	Malyngamide J	Alcohol and amines	Amines	C33H53NO9	2	0.7329	-	30190	37177.2	42199.8	2672.38	2081.5	6507.56	1.34752	0.005231	0.0293638	9.7294	3.28235	up
MW0156670	Ser-Asn-Tyr	Amino acids and derivatives	Amino acids and derivatives	C16H22N4O7	2	0.7317	-	22529.5	26649.2	17970.9	70009.4	51948.4	75688	1.34768	0.0172894	0.0646667	0.339747	-1.55747	down
MW0150089	Glu-Met-Glu	Amino acids and derivatives	Amino acids and derivatives	C15H25N3O8S1	2	0.7306	-	957.38	565.96	503.16	739.46	1394.95	1280.26	0.961575	0.142522	0.28618	0.593469	-0.752756	insig
MW0151617	Ile-Trp-Thr	Amino acids and derivatives	Amino acids and derivatives	C21H30N4O5	2	0.7296	-	92659	95805.8	106899	90898.2	78741.1	87582	1.05462	0.0892448	0.204684	1.14829	0.199483	insig
MW0137930	Deoxysappanone B 7,3'-dimethyl ether acetate	Others	Ketone compounds	C20H20O6	2	0.7293	-	15735.8	21445.8	14571	2999.49	3762.79	7835.58	1.27514	0.011505	0.0489845	3.54522	1.82587	up
MW0158400	Tyr-Asn-Ser	Amino acids and derivatives	Amino acids and derivatives	C16H22N4O7	2	0.7291	-	185550	188466	184323	270356	248561	248713	1.38474	0.009068	0.0418326	0.727353	-0.459272	insig
MW0149947	Glu-Asp-His	Amino acids and derivatives	Amino acids and derivatives	C15H21N5O8	2	0.729	-	13681.2	16771.7	15169.3	19733.3	19162.8	15468	0.938504	0.15451	0.30242	0.839195	-0.252921	insig
MW0156841	Ser-Lys-Gly	Amino acids and derivatives	Amino acids and derivatives	C11H22N4O5	2	0.728	-	10.02	60.75	252.4	101.98	33.86	76.86	0.128732	0.672176	0.769947	1.51937	0.603473	insig
MW0058181	1-(9Z-heptadecenoyl)-sn-glycero-3-phosphoethanolamine	GP	PE	C22H44NO7P	2	0.7266	-	2302.32	2673.63	1967.21	17711.9	15252	16802.5	1.39987	0.00132219	0.0122553	0.139515	-2.84151	down
MW0157785	Thr-Pro-Phe	Amino acids and derivatives	Amino acids and derivatives	C18H25N3O5	2	0.7266	-	23069.4	20225.3	12049.5	43202	41139.2	36785.5	1.25935	0.00880722	0.0410885	0.456912	-1.13001	down
MW0103515	[(2R,5R)-5-(4-amino-2-oxopyrimidin-1-yl)-4-hydroxy-2-(hydroxymethyl)oxolan-3-yl] dihydrogen phosphate	Nucleotides and derivatives	Nucleotides and derivatives	C9H14N3O8P	2	0.7257	-	718707	703380	734650	1.69738e+06	1.6706e+06	1.62557e+06	1.40558	6.8983e-05	0.00237207	0.431904	-1.21122	down
MW0155986	Pro-Pro-Val	Amino acids and derivatives	Amino acids and derivatives	C15H25N3O4	2	0.7255	-	9365.46	7441.56	7068.43	20074.5	13563.3	14669.7	1.29617	0.0435032	0.121648	0.494239	-1.01672	down
MW0144600	Ala-His-Thr	Amino acids and derivatives	Amino acids and derivatives	C13H21N5O5	2	0.7255	-	807.22	656.96	140.01	1546.3	87.78	391.82	0.0767609	0.793362	0.857596	0.791841	-0.336718	insig
MW0002109	2,3,4-Trihydroxy-4'-ethoxybenzophenone	Benzene and substituted derivatives	Benzene and substituted derivatives	C15H14O5	2	0.7248	-	57023.5	96178.1	82761.4	7068.21	80269.4	1649.24	0.941978	0.183526	0.340288	2.65166	1.4069	insig
MW0150812	His-Ala-Gln-Lys	Amino acids and derivatives	Amino acids and derivatives	C20H34N8O6	2	0.7248	-	35747.9	34002	12230.4	46884.1	32632.1	23501.5	0.484475	0.528979	0.661757	0.795789	-0.329543	insig
MW0144584	Ala-Gly-Val	Amino acids and derivatives	Amino acids and derivatives	C10H19N3O4	2	0.7247	-	12563.3	14847.6	13576.8	27770.2	27620.5	31006	1.38805	0.000870603	0.00975644	0.474412	-1.07579	down
MW0155303	Phe-Phe-Leu	Amino acids and derivatives	Amino acids and derivatives	C24H31N3O4	2	0.7244	-	58003.4	66814.1	61095.9	76009.4	69256.5	73782.7	1.20592	0.0303333	0.0944431	0.848731	-0.236621	insig
MW0158560	Tyr-Met-Tyr	Amino acids and derivatives	Amino acids and derivatives	C23H29N3O6S1	2	0.7237	-	23995.1	42101.6	34387.9	51242.8	45847.7	56065.7	1.10609	0.0580687	0.149586	0.656092	-0.60803	insig
MW0109342	Pro-Val-Arg	Amino acids and derivatives	Amino acids and derivatives	C16H30N6O4	2	0.7232	-	99816.1	103414	112519	117827	121412	128796	1.21959	0.025763	0.0848279	0.857931	-0.221067	insig
MW0147991	Cys-Asp-His	Amino acids and derivatives	Amino acids and derivatives	C13H19N5O6S1	2	0.7227	-	260236	267406	266655	239468	230553	221915	1.33095	0.0108495	0.0471899	1.14793	0.199039	insig
MW0146299	Asp-Tyr-Gln	Amino acids and derivatives	Amino acids and derivatives	C18H24N4O8	2	0.7209	-	105815	101072	100285	101078	115876	114190	0.872381	0.22352	0.384649	0.927606	-0.108416	insig
MW0169452	Marmesin acetate	Benzene and substituted derivatives	Benzene and substituted derivatives	C16H16O5	2	0.7208	-	610655	634019	614645	486099	487896	500995	1.3953	0.000305497	0.00548685	1.26056	0.334069	insig
MW0153634	Met-Phe-Phe	Amino acids and derivatives	Amino acids and derivatives	C23H29N3O4S1	2	0.7201	-	16257.6	13556.6	18609.5	7338.61	4086.57	7337.51	1.28619	0.00697471	0.0352856	2.58085	1.36785	up
MW0146207	Asp-Met-His	Amino acids and derivatives	Amino acids and derivatives	C15H23N5O6S	2	0.7198	-	81.99	260.38	31.23	46.27	104.39	91.5	0.145509	0.597006	0.711536	1.54278	0.625534	insig
MW0146184	Asp-Lys-Asp	Amino acids and derivatives	Amino acids and derivatives	C14H24N4O8	2	0.719	-	15496.1	12333.6	12036.1	28119.1	25473.2	28732.1	1.36736	0.000723585	0.00900462	0.484253	-1.04617	down
MW0150883	His-Cys-Asp	Amino acids and derivatives	Amino acids and derivatives	C13H19N5O6S1	2	0.7185	-	2.15354e+06	2.18148e+06	2.23574e+06	1.79012e+06	1.80505e+06	1.70472e+06	1.38075	0.000590208	0.00798789	1.23979	0.310099	insig
MW0148047	Cys-Met-Ser	Amino acids and derivatives	Amino acids and derivatives	C11H21N3O5S2	2	0.7177	-	2466.69	2775.44	2527.46	375.12	750.23	3513.88	0.823559	0.402354	0.561656	1.67476	0.743953	insig
MW0150879	His-Asp-Tyr	Amino acids and derivatives	Amino acids and derivatives	C19H23N5O7	2	0.7175	-	5034.6	14965.1	14871.4	8298.39	8153.64	10242.6	0.298886	0.497038	0.636613	1.3063	0.385483	insig
MW0138535	Isorhapontin	Heterocyclic compounds	Heterocyclic compounds	C21H24O9	2	0.7167	-	222716	223033	236987	175296	172844	171527	1.38966	0.00532424	0.029651	1.31379	0.393739	insig
MW0107457	Ile-Phe-Lys	Amino acids and derivatives	Amino acids and derivatives	C21H34N4O4	2	0.7162	-	2678.66	2596.62	1194.37	2250.62	109718	122850	1.00289	0.184497	0.340322	0.0275517	-5.18171	down
MW0158401	Tyr-Asn-Trp	Amino acids and derivatives	Amino acids and derivatives	C24H27N5O6	2	0.7158	-	634.56	849.74	693.44	137.71	414.06	776.45	0.803347	0.261821	0.429684	1.63959	0.713338	insig
MW0109128	Phe-Pro-Ala	Amino acids and derivatives	Amino acids and derivatives	C17H23N3O4	2	0.7147	-	1455.32	673.21	834.72	3075.05	8588.12	10168.2	1.28027	0.0979301	0.218393	0.135734	-2.88115	down
MW0150119	Glu-Pro-Asp	Amino acids and derivatives	Amino acids and derivatives	C14H21N3O8	2	0.7144	-	142	486.8	783.72	119.36	263.99	816.11	0.230041	0.813699	0.871635	1.17763	0.235886	insig
MW0151127	His-Tyr-Glu	Amino acids and derivatives	Amino acids and derivatives	C20H25N5O7	2	0.712	-	954388	968959	1.03284e+06	1.07302e+06	1.05717e+06	1.0566e+06	1.17764	0.0793218	0.186814	0.927637	-0.108368	insig
MW0150334	Gly-Cys-Asp	Amino acids and derivatives	Amino acids and derivatives	C9H15N3O6S1	2	0.7117	-	445.11	3074.3	3353.1	95.12	36.59	189.42	1.23206	0.142157	0.285874	21.401	4.41961	up
MW0108165	Met-Lys-Lys	Amino acids and derivatives	Amino acids and derivatives	C17H35N5O4S1	2	0.7117	-	24842.5	27784.7	25554.1	33053.3	27971	31394.9	1.14257	0.0659309	0.164603	0.845942	-0.24137	insig
MW0109125	Phe-Phe-Asp	Amino acids and derivatives	Amino acids and derivatives	C22H25N3O6	2	0.7115	-	2541.3	2657.16	1635.5	2317.68	5496.62	4428.53	0.939664	0.184912	0.340622	0.558201	-0.841143	insig
MW0106265	Cys-Phe-Lys	Amino acids and derivatives	Amino acids and derivatives	C18H28N4O4S1	2	0.7115	-	13.53	51.92	15.78	3951.54	3680.41	3830.13	1.38786	0.000317273	0.00557753	0.00708685	-7.14064	down
MW0153660	Met-Ser-His	Amino acids and derivatives	Amino acids and derivatives	C14H23N5O5S1	2	0.7115	-	28.41	107.74	71.29	258.57	54.45	439.65	0.846339	0.241115	0.405317	0.275606	-1.85932	insig
MW0123471	9H-Pyrrolo[1',2':2,3]isoindolo[4,5,6-cd]indol-9-one, 10-acetyl-2,6,6a,7,11a,11b-hexahydro-11-hydroxy-7,7-dimethyl-, (6aR,11aS,11bR)-	Organic acids	Organic acids	C20H20N2O3	2	0.7114	-	622.6	50.1	391.93	654.69	770.36	914.59	0.8622	0.109022	0.237609	0.45504	-1.13593	insig
MW0153130	Lys-Ser-Gly	Amino acids and derivatives	Amino acids and derivatives	C11H22N4O5	2	0.7112	-	1750.06	85.16	231.48	1848.65	2286.89	1504.59	0.979487	0.141605	0.285333	0.366428	-1.4484	insig
MW0151100	His-Thr-Phe	Amino acids and derivatives	Amino acids and derivatives	C19H25N5O5	2	0.7105	-	12229.5	15410.2	16136.8	6600.7	14075.4	2738.26	0.917346	0.168448	0.31975	1.86964	0.902761	insig
MW0155914	Pro-Leu-Met	Amino acids and derivatives	Amino acids and derivatives	C16H29N3O4S1	2	0.71	-	62.45	22.47	64.53	3080.74	259.51	41.64	0.853265	0.385733	0.547055	0.0441913	-4.50009	insig
MW0110082	Trp-Thr	Amino acids and derivatives	Amino acids and derivatives	C15H19N3O4	2	0.7085	-	22725.9	10317	3118.24	46540.4	66074.7	18156.6	1.01494	0.138564	0.281739	0.276521	-1.85454	down
MW0109633	Ser-Pro-Lys	Amino acids and derivatives	Amino acids and derivatives	C14H26N4O5	2	0.706	-	3115.85	2846.96	2589.56	1408.29	571.99	788.7	1.28213	0.00531003	0.0296128	3.08864	1.62697	up
MW0157674	Thr-Ile-Ala	Amino acids and derivatives	Amino acids and derivatives	C13H25N3O5	2	0.7056	-	46032.8	21333.7	50981.3	113132	112733	3372.01	0.0284884	0.419722	0.574485	0.516269	-0.953805	insig
MW0150923	His-Glu-Met	Amino acids and derivatives	Amino acids and derivatives	C16H25N5O6S1	2	0.7051	-	41.17	79.34	19.33	1269.99	454.93	989.79	1.33335	0.068833	0.169642	0.0515119	-4.27895	down
MW0150528	Gly-Val-Asn	Amino acids and derivatives	Amino acids and derivatives	C11H20N4O5	2	0.7044	-	17685.4	35491.3	16523	34230.2	11201.1	23960.6	0.068232	0.99151	0.993892	1.00443	0.00638351	insig
MW0110198	Tyr-Glu-Leu	Amino acids and derivatives	Amino acids and derivatives	C20H29N3O7	2	0.7042	-	77.18	22.45	82.78	371.48	169.29	41.25	0.748308	0.298696	0.466689	0.313408	-1.67388	insig
MW0144543	Ala-Gln-Leu	Amino acids and derivatives	Amino acids and derivatives	C14H26N4O5	2	0.7029	-	839.88	2887.41	2946.36	639.17	122.58	1152.64	0.95449	0.135505	0.276662	3.48605	1.80159	insig
MW0158422	Tyr-Cys-Cys	Amino acids and derivatives	Amino acids and derivatives	C15H21N3O5S2	2	0.7015	-	158.38	70.27	86.68	21.03	217.25	104.29	0.224917	0.894894	0.931392	0.920483	-0.119536	insig
MW0157599	Thr-Cys-Gly	Amino acids and derivatives	Amino acids and derivatives	C9H17N3O5S1	2	0.7014	-	11111	11184.4	5149.36	20630.9	20193.5	20793.9	1.21008	0.0286296	0.0914301	0.445401	-1.16682	down
MW0153525	Met-Cys-His	Amino acids and derivatives	Amino acids and derivatives	C14H23N5O4S2	2	0.7007	-	56207.6	56687.3	55285.2	37365.2	42103.3	34701.2	1.35084	0.0118844	0.0499146	1.47307	0.558827	insig
MW0156053	Pro-Val-Phe	Amino acids and derivatives	Amino acids and derivatives	C19H27N3O4	2	0.7002	-	389.87	149.24	41.97	70.49	250.44	412.87	0.299975	0.739301	0.818469	0.791878	-0.33665	insig
MW0159152	Val-Ser-Gln	Amino acids and derivatives	Amino acids and derivatives	C13H24N4O6	2	0.7001	-	845827	858183	836397	945494	873643	925079	1.18314	0.0761327	0.18136	0.925732	-0.111334	insig
MW0012813	[(2R)-3-hexadecanoyloxy-2-[(6E,9E)-octadeca-6,9-dienoyl]oxypropyl] 2-(trimethylazaniumyl)ethyl phosphate	GP	PC	C42H80NO8P	3	0.9949	-	371665	257905	487190	634059	498197	610732	1.07678	0.0669739	0.166526	0.640716	-0.642243	insig
MW0010669	4-[5-(4-Hydroxy-3,5-dimethoxyphenyl)-3,4-bis(hydroxymethyl)oxolan-2-yl]-2,6-dimethoxyphenol	Lignans and Coumarins	Lignans	C22H28O9	3	0.9813	-	15123.4	16582.1	14144.7	16727.5	15980	14504.6	0.326281	0.662143	0.762957	0.971152	-0.0422317	insig
ZINC85921663	Thelephantin J	Benzene and substituted derivatives	Benzene and substituted derivatives	C32H22O8	3	0.9757	-	1.1452e+06	1.25092e+06	1.46835e+06	1.54439e+06	1.80563e+06	1.79015e+06	1.19708	0.0294298	0.0930883	0.751817	-0.411546	insig
MW0003109	[(2R,3S,4S,5R,6S)-3,4,5-trihydroxy-6-[2-hydroxy-4,4,6,6-tetramethyl-2-(2-methylprop-1-enyl)-3,5-dioxocyclohexyl]oxyoxan-2-yl]methyl 3,4,5-trihydroxybenzoate	Benzene and substituted derivatives	Benzene and substituted derivatives	C27H36O13	3	0.9746	-	75193.4	60261	69281.8	41593.4	48013.2	50416.4	1.27978	0.0197574	0.0709323	1.46216	0.548103	insig
MW0166260	[(2S)-2-[(9Z,12E,15Z)-octadeca-9,12,15-trienoyl]oxy-3-[(2R,3R,4S,5R,6R)-3,4,5-trihydroxy-6-[[(2R,3R,4S,5R,6R)-3,4,5-trihydroxy-6-(hydroxymethyl)oxan-2-yl]oxymethyl]oxan-2-yl]oxypropyl] (9Z,12Z,15Z)-octadeca-9,12,15-trienoate	GL	TG	C51H84O15	3	0.9734	-	58338.6	137875	171107	352166	213321	272850	1.09977	0.0415888	0.118339	0.438154	-1.19049	down
MW0160607	azanium;[(2S)-2,3-dihydroxypropyl] [(2R)-2,3-di(tetradecanoyloxy)propyl] phosphate	GP	PA	C34H70NO10P	3	0.9558	-	38250.4	8941.55	34208.2	112654	107847	2155.01	0.13622	0.320572	0.488121	0.365588	-1.45171	insig
ZINC85490309	1,3-Bis(24-methyl-5,7,18,20-tetraoxa-24-azoniahexacyclo[11.11.0.02,10.04,8.014,22.017,21]tetracosa-1(13),2,4(8),9,11,14(22),15,17(21)-octaen-24-yl)propan-2-one	Alkaloids	Alkaloids	C43H34N2O9+2	3	0.9528	-	101367	67333.5	62153.8	327084	278832	301546	1.37194	0.000289014	0.00532825	0.254396	-1.97485	down
MW0013097	6-[2,3-dihydroxy-3-methyl-1-[(2R,3R,4S,5S,6R)-3,4,5-trihydroxy-6-(hydroxymethyl)oxan-2-yl]oxybutyl]-7-methoxychromen-2-one	Others	Saccharides	C21H28O11	3	0.9402	-	4740.22	5728.17	4248.7	146.7	5025.52	117.81	0.986838	0.187765	0.344592	2.78204	1.47614	insig
MW0166240	cytosyl-4'-oxo-beta-D-glucuronate	Organic acids	Organic acids	C10H10N3O7-	3	0.9344	-	87.08	8865.61	11027	13433.1	14914.9	13165.6	0.727918	0.161924	0.311042	0.481282	-1.05505	insig
MW0145393	Arg-Ile-Ile	Amino acids and derivatives	Amino acids and derivatives	C18H36N6O4	3	0.9306	-	569644	673137	658267	1.137e+06	1.13957e+06	1.14139e+06	1.38498	0.00401071	0.0247644	0.556192	-0.846345	insig
MW0012301	NCGC00380960-01_C30H50O6_13,17,24,25-Tetrahydroxy-16,23-epoxydammaran-3-one	Others	Ketone compounds	C30H50O6	3	0.9211	-	45699.6	42869.5	46134.2	73379.7	69854	73143.2	1.39718	6.355e-05	0.00229891	0.62254	-0.683762	insig
MW0011753	[4,5-dihydroxy-3,4-bis(hydroxymethyl)-4a,8,8-trimethyl-5,6,7,8a-tetrahydro-1H-naphthalen-1-yl] octanoate	Others	Lactones	C23H40O6	3	0.9174	-	36901.8	55298.2	82907.6	141335	159256	170801	1.27699	0.0057037	0.0310355	0.371469	-1.42869	down
ZINC95910092	(25S)-5alpha-Cholestane-3beta,6alpha,7alpha,8,15alpha,16beta,26-heptaol	Alcohol and amines	Alcohols	C27H48O7	3	0.9066	-	284013	226489	221336	517694	532738	455167	1.36287	0.00129807	0.0121717	0.486077	-1.04074	down
MEDP1166	1-Palmitoyl-2-acetyl-sn-glycero-3-phosphocholine	GP	PC	C26H52NO8P	3	0.8892	-	162741	177293	187831	442382	516302	568414	1.38906	0.00965148	0.0434317	0.345665	-1.53255	down
MEDP1343	LPC(0:0/18:3)	Lipids	LPC	C26H49NO7P	3	0.8863	-	2.11239e+07	2.07315e+07	2.03331e+07	3.4749e+07	3.49799e+07	3.381e+07	1.40437	2.34425e-05	0.0014258	0.60063	-0.735453	insig
MW0160467	Phosphonatoenolpyruvate	Alcohol and amines	Amines	C3H2O6P-3	3	0.8846	-	86806.1	45003.1	85209.4	28834.9	185474	47152	0.10983	0.796703	0.859825	0.830022	-0.268778	insig
MW0165285	Vitexin 2''-O-beta-L-rhamnoside	Flavonoids	Flavones	C27H29O14-	3	0.8767	-	21558.9	66.41	241.57	615.3	41524.3	35878.3	0.71328	0.287927	0.455799	0.28028	-1.83506	insig
ZINC85511153	[(2R,3R,4R,5S,6S)-2-[[(2S,4S,5R,6S)-4,5-dihydroxy-6-[5-hydroxy-2-(4-methoxyphenyl)-4-oxochromen-7-yl]oxyoxan-2-yl]methoxy]-3,5-dihydroxy-6-methyloxan-4-yl] 3-methylbutanoate	Others	Lactones	C33H40O14	3	0.8639	-	73933.7	73116.2	78234	276602	253593	266774	1.40496	0.000710499	0.00895229	0.282676	-1.82278	down
ZINC85493813	2-(1,7-Dihydroxy-6,8-dimethoxy-3-methyl-5-propan-2-ylnaphthalen-2-yl)-6,8-dimethoxy-3-methyl-5-propan-2-ylnaphthalene-1,7-diol	Benzene and substituted derivatives	Benzene and substituted derivatives	C32H38O8	3	0.8373	-	7652.41	131.23	9603.66	315.92	6894.27	712.93	0.252407	0.432954	0.584227	2.1945	1.13389	insig
ZINC49605578	Curtisian E	Benzene and substituted derivatives	Benzene and substituted derivatives	C37H36O12	3	0.8365	-	737.17	1155.57	1606.93	117.14	45.14	1787.63	0.835209	0.472256	0.616026	1.79479	0.843811	insig
MW0141494	16-Oxosteroid	Others	Ketone compounds	C19H30O2	3	0.8361	-	178752	215897	220543	324265	1.18432e+06	710028	1.17191	0.1643	0.314857	0.277287	-1.85055	down
MEDN1212	7alpha,12beta-Dihydroxy-5alpha-cholan-24-oic Acid	Tryptamines,Cholines,Pigments	Cholines	C24H40O4	3	0.8164	-	395.15	43.15	210.87	6111.58	3878.71	37110	1.27738	0.285608	0.453554	0.0137827	-6.181	down
ZINC85948878	Deoxycalyxin A 3'-hydroperoxide	Others	Ketone compounds	C35H34O9	3	0.8101	-	1.21881e+06	1.19568e+06	1.19652e+06	1.61491e+06	1.57023e+06	1.59696e+06	1.40316	7.4876e-05	0.00243468	0.755112	-0.405238	insig
MEDP1446	Octadecadienamide	Alcohol and amines	Amines	C18H33NO	3	0.8075	-	23739.8	25795.4	31255.1	88665.8	86860.4	92992.7	1.39331	3.72348e-05	0.00176161	0.300874	-1.73277	down
ZINC43120336	[2,5-dihydroxy-3,6-bis(4-hydroxyphenyl)-4-(3-phenylpropanoyloxy)phenyl] (3S)-3-hydroxybutanoate	Benzene and substituted derivatives	Benzene and substituted derivatives	C31H28O9	3	0.797	-	8304.18	4649.97	6904.66	95.97	684.02	1134.55	1.22501	0.0233679	0.0789767	10.3726	3.37471	up
MW0146838	Bouillonamide A	Amino acids and derivatives	Amino acids and derivatives	C46H67N5O8	3	0.7877	-	15170.8	33288	304905	324242	243181	174734	0.890444	0.303305	0.471262	0.47613	-1.07057	insig
MW0147486	Cimigenol	Alcohol and amines	Alcohols	C30H48O5	3	0.7816	-	30498.2	36188.2	30616.1	36014.8	43273.9	61942.6	1.01088	0.193214	0.350763	0.688959	-0.537511	insig
MW0146409	Atractyloside D	Terpenoids	Sesquiterpenoids	C27H46O12	3	0.7807	-	165.43	632.38	321.6	811.68	861.89	1203.51	1.12124	0.0341522	0.102993	0.389079	-1.36187	down
MW0143096	3-Oxo-delta5-steroid	Others	Ketone compounds	C19H28O	3	0.7754	-	175806	196275	213547	391380	363658	379249	1.38421	0.000289406	0.00532825	0.516297	-0.953728	insig
MW0129657	1,3,4-trihydroxy-5-[(E)-3-[2-(4-hydroxy-3-methoxyphenyl)-3-(hydroxymethyl)-7-methoxy-2,3-dihydro-1-benzofuran-5-yl]prop-2-enoyl]oxycyclohexane-1-carboxylic acid	Organic acids	Organic acids	C27H30O12	3	0.7701	-	102463	142908	120190	126988	152290	147952	0.82607	0.227891	0.389842	0.855654	-0.2249	insig
MW0011336	(3S,5R,8R,10R,13R,14S,17R)-3-[5-[(2S,3R,4R,5S,6R)-3,4-dihydroxy-6-(hydroxymethyl)-5-[(2S,3R,4S,5S,6R)-3,4,5-trihydroxy-6-(hydroxymethyl)oxan-2-yl]oxyoxan-2-yl]oxy-4-methoxy-6-methyloxan-2-yl]oxy-14-hydroxy-13-methyl-17-(5-oxo-2H-furan-3-yl)-1,2,3,4,5,6,7,8,9,11,12,15,16,17-tetradecahydrocyclopenta[a]phenanthrene-10-carbaldehyde	Others	Lactones	C42H64O18	3	0.7672	-	530.3	29.21	57.15	699.09	1591.6	499.56	1.05818	0.150897	0.297515	0.221005	-2.17785	down
MEDP1331	LPC(0:0/20:3)	Lipids	LPC	C28H53NO7P	3	0.7619	-	743.25	812.96	998.61	904.74	1243.09	1350.63	1.00541	0.129686	0.267584	0.73027	-0.453498	insig
MW0143095	3-oxo Delta(4)-steroid	Others	Ketone compounds	C19H28O	3	0.7574	-	7601.33	20253.4	22873	24170.1	36956.6	33419.4	0.97267	0.0764465	0.181848	0.536539	-0.898245	insig
MW0163212	di-trans,octa-cis-Undecaprenyl phosphate	Organic acids	Organic acids	C55H89O4P-2	3	0.7479	-	33646.1	30308.8	16959.4	11966.5	8846.38	20964.3	1.01177	0.112931	0.243495	1.9368	0.953676	insig
MW0149837	Gln-Tyr-Gln	Amino acids and derivatives	Amino acids and derivatives	C19H27N5O7	3	0.7472	-	254.96	1969.67	3704.55	1532.45	1118.79	2235.1	0.200802	0.76662	0.839948	1.21342	0.279078	insig
MW0000570	(2,5-Dibenzoyloxy-1,6-dihydroxycyclohex-3-en-1-yl)methyl benzoate	Benzene and substituted derivatives	Benzene and substituted derivatives	C28H24O8	3	0.744	-	764.95	593.05	2165.6	1288.81	511.11	992.11	0.195541	0.688069	0.781271	1.26202	0.335736	insig
MW0151580	Ile-Ser-Met	Amino acids and derivatives	Amino acids and derivatives	C14H27N3O5S1	3	0.7412	-	16523.1	13922.9	12464.6	15436.5	13977.5	16246.4	0.476596	0.546626	0.673509	0.939777	-0.0896104	insig
MW0163756	[(2S)-2-azaniumyl-2-carboxyethyl] [(2R)-2,3-bis[[(Z)-octadec-9-enoyl]oxy]propyl] phosphate	GL	DG	C42H78NO10P	3	0.7395	-	4651.51	60849.8	60087.3	142556	391127	32801.1	0.804617	0.298715	0.466689	0.221699	-2.17333	insig
MW0011752	[4,5-dihydroxy-3,4-bis(hydroxymethyl)-4a,8,8-trimethyl-5,6,7,8a-tetrahydro-1H-naphthalen-1-yl] hexanoate	Others	Lactones	C21H36O6	3	0.7383	-	19217.9	46861.6	59031.4	60868.8	89562.3	84885.9	0.990744	0.0722301	0.174765	0.53167	-0.911398	insig
MW0164419	(4aR,12bR)-4a,7,8-trihydroxy-3-methyl-5,12b-dihydro-4H-benzo[a]anthracene-1,6-dione	Benzene and substituted derivatives	Benzene and substituted derivatives	C19H16O5	3	0.7361	-	11892.9	21158.3	22890.2	27932.8	21160.6	21956.4	0.727781	0.291182	0.45897	0.787354	-0.344915	insig
MW0143553	5alpha-Ergosta-7,22-diene-3beta,5-diol	Alcohol and amines	Alcohols	C28H46O2	3	0.7346	-	121892	107403	198676	144869	134825	5667.25	0.612883	0.429211	0.580926	1.49975	0.584726	insig
MW0105689	Arginylasparagylarginine	Amino acids and derivatives	Amino acids and derivatives	C16H32N10O5	3	0.7342	-	4350.81	5249.9	2272.75	1204.31	2988.91	781.69	1.01162	0.111967	0.242307	2.38667	1.255	up
ZINC49833052	(R)-N-[(1S,2R,3E,7Z)-1-[(beta-D-Glucopyranosyloxy)methyl]-2-hydroxy-3,7-heptadecadienyl]-2-hydroxyoctadecanamide	Alcohol and amines	Amines	C42H79NO9	3	0.734	-	42.48	12.69	8015.74	19.64	17.81	52.58	0.580728	0.423003	0.576004	89.6469	6.48618	insig
MW0161352	[3-hexadecanoyloxy-2-[(9Z,12Z,15Z)-octadeca-9,12,15-trienoyl]oxypropyl] 2-(trimethylazaniumyl)ethyl phosphate	GP	PC	C42H78NO8P	3	0.7339	-	9827.69	6762.94	24833.4	204.58	368.54	808.2	1.33786	0.139175	0.282554	29.9887	4.90635	up
MW0141741	2-[[3-hexadecanoyloxy-2-[(Z)-octadec-9-enoyl]oxypropoxy]-hydroxyphosphoryl]oxyethyl-trimethylazanium	GP	PC	C42H83NO8P+	3	0.7328	-	9438.74	3103.64	6340.7	12.52	101.57	17.43	1.35718	0.075951	0.181311	143.576	7.16567	up
MW0164283	N-hydroxy-L-isoleucinate	Amino acids and derivatives	Amino acids and derivatives	C6H12NO3-	3	0.7327	-	11497.9	8566.66	14994.3	23501	10124.3	14192.5	0.599835	0.406175	0.564917	0.733177	-0.447767	insig
MW0142540	2-Oxo-6-methylthiohexanoic acid	Organic acids	Organic acids	C7H12O3S	3	0.7325	-	15190.3	14615.7	13747.2	26501.9	14785.5	14402.9	0.640385	0.415596	0.572737	0.782061	-0.354647	insig
MEDN1198	1-O-glucosinoyl-β-D-glucose	Phenolic acids	Phenolic acids	C17H22O10	3	0.7318	-	30916.3	25918.3	31222.1	68440.2	42139.5	64211.6	1.26346	0.065452	0.16361	0.503782	-0.98913	insig
MW0140064	(-)-Threo-isodihomocitric acid	Organic acids	Organic acids	C8H12O7	3	0.7314	-	37021	43884.3	45672	15154.8	16370.6	16108.4	1.39325	0.00886372	0.041126	2.6573	1.40996	up
MW0165740	4-Methylthiobutyl-desulfoglucosinolate	Others	Glucosinolates	C12H23NO6S2	3	0.7303	-	23.93	667.29	1056.14	34652.1	70782	40644.6	1.2744	0.0498856	0.133381	0.0119618	-6.38542	down
MW0166737	(3R,4S,9R,11R)-27-(4-hydroxyphenyl)-3-methoxy-4-methylheptacosane-9,11-diol	FA	Others	C35H64O4	3	0.7294	-	6426.4	5885.82	4907.12	916.73	2954.23	7263.9	0.741855	0.392492	0.552944	1.54644	0.628946	insig
MW0145720	Asn-Gln-Gln	Amino acids and derivatives	Amino acids and derivatives	C14H24N6O7	3	0.7284	-	88.08	205.64	363.84	217.57	83.12	212.27	0.240124	0.632515	0.741366	1.28189	0.358276	insig
MW0153109	Lys-Phe-Val	Amino acids and derivatives	Amino acids and derivatives	C20H32N4O4	3	0.7283	-	25003.5	17171.5	13374.6	57348.8	18130.1	52811.1	0.948353	0.182783	0.339622	0.432999	-1.20756	insig
MEDN1384	D-Quinovose	Others	Saccharides	C6H12O5	3	0.7278	-	35946.9	35261.8	36268	38558	36533.4	35861.1	0.788649	0.287337	0.455045	0.968673	-0.0459189	insig
MW0014313	4-(3-Acetyl-2,6-dihydroxyphenyl)-2-methoxy-4-[3,4,5-trihydroxy-6-(hydroxymethyl)oxan-2-yl]oxybutanoic acid	Organic acids	Organic acids	C19H26O12	3	0.7267	-	85.21	259.66	374.23	264.93	1876	278.78	0.722506	0.400445	0.560372	0.297184	-1.75057	insig
MW0168059	(E,2Z)-2-[amino(carboxy)methylidene]-5-oxopent-3-enoate	Others	Others	C7H6NO5-	3	0.7255	-	1670.25	352.41	1815.31	867	1913.15	1393.63	0.303879	0.851475	0.899778	0.919543	-0.121011	insig
ZINC70451003	Yuanhuafine	Terpenoids	Terpene	C29H32O10	3	0.7253	-	19572	15894.8	18744.9	59194.8	32938.3	26003.5	1.15325	0.168096	0.319549	0.458889	-1.12378	down
ZINC95911730	3'-O-beta-Glucopyranosyl-stilbericoside	Alcohol and amines	Alcohols	C20H30O15	3	0.7247	-	6407.65	4206.06	5347.2	1917.48	1598.83	4372.19	1.07729	0.0738278	0.177822	2.02331	1.01672	up
MW0111553	[4,5-Dihydroxy-6-(hydroxymethyl)-2-[2,4,6-trihydroxy-3-(4-hydroxybenzoyl)phenyl]oxan-3-yl] 3,4,5-trihydroxybenzoate	Benzene and substituted derivatives	Benzene and substituted derivatives	C26H24O14	3	0.7237	-	45.66	63.99	189.88	4354.6	68.48	191.58	0.711805	0.414619	0.571732	0.0649084	-3.94545	insig
MW0004537	4-[2-(Pyrimidin-2-ylamino)-1,3-thiazol-4-yl]benzene-1,2-diol	Phenolic acids	Phenolic acids	C13H10N4O2S	3	0.7229	-	1.94062e+06	2.09531e+06	2.12741e+06	4.58179e+06	4.62385e+06	4.52623e+06	1.40305	4.67119e-05	0.00194168	0.448835	-1.15574	down
MW0121508	6-[(3-Aminophenyl)methyl]-4,6-dihydro-4-methyl-2-(methylsulfinyl)-5h-thieno[2',3':4,5]pyrrolo[2,3-d]pyridazin-5-one	Heterocyclic compounds	Heterocyclic compounds	C17H16N4O2S2	3	0.7216	-	52101.7	56026.8	45815.4	49981.9	47392.3	50659.9	0.391829	0.583642	0.699954	1.03992	0.0564756	insig
MEDL00444	Pro-Ile	Amino acids and derivatives	Amino acids and derivatives	C11H20N2O3	3	0.7213	-	1.19698e+06	1.24971e+06	1.25671e+06	1.41438e+06	1.40425e+06	1.2254e+06	0.927737	0.198769	0.356988	0.915769	-0.126945	insig
MW0141229	10-Hydroxyloganin	Others	Lactones	C17H26O11	3	0.7195	-	44441.4	40293.2	44240.3	53700.2	35148.1	50157.7	0.30303	0.619792	0.730916	0.927837	-0.108056	insig
MW0151247	3-[(1R,2S,3S,5Z,7S,8S,9Z,13S,14Z,17R,18R)-3,13,17-tris(2-carboxyethyl)-2,7,18-tris(carboxymethyl)-1,2,5,7,12,12,15,17-octamethyl-3,8,13,18,19,22-hexahydrocorrin-8-yl]propanoic acid	Organic acids	Organic acids	C45H60N4O14	3	0.7193	-	569.78	316.64	823.53	46.48	707.32	620.32	0.473922	0.684302	0.778089	1.2444	0.315446	insig
MW0164056	(1S,2R,3S,4S,5R,6S)-4-azaniumyl-2-{[azaniumyl(imino)methyl]amino}-3,5,6-trihydroxycyclohexyl phosphate	Others	Others	C7H17N4O7P	3	0.7189	-	65.04	67.07	1128.89	868.02	105.02	1304.86	0.558728	0.533792	0.665712	0.55358	-0.853136	insig
MW0165953	5-methyl-4-oxo-2-(2-oxopropyl)-8-[(2S,3R,4R,5S,6R)-3,4,5-trihydroxy-6-(hydroxymethyl)oxan-2-yl]chromen-7-olate	Heterocyclic compounds	Heterocyclic compounds	C19H21O9-	3	0.7163	-	621.08	238.8	624.76	807.34	1821.71	1382.75	1.11132	0.0863537	0.199873	0.370068	-1.43414	down
MW0154972	Pelargonidin 3-sambubioside 5-glucoside	Flavonoids	Anthocyanidins	C32H39O19+	3	0.7161	-	25.35	6404.7	10033.1	59.6	253.98	14144.4	0.188301	0.910249	0.942507	1.13869	0.18738	insig
MW0140425	(2S)-2-hydroxy-3,4-diketopentyl phosphate	Organic acids	Organic acids	C5H9O7P	3	0.7145	-	2135.12	2273.77	1193.63	67.67	1961.9	207.06	0.931654	0.20234	0.360351	2.50489	1.32475	insig
MW0164396	1-[(2-azaniumyl-4-methylpentanoyl)amino]ethenyl-hydroxyphosphinate	Others	Others	C8H17N2O4P	3	0.7142	-	64675.5	57374.3	64051.8	20455.4	23661.7	31611.3	1.35074	0.00133058	0.0123048	2.45749	1.29719	up
MW0003129	2-hydroxy-6-[(Z)-nonadec-8-enyl]benzoic acid	Benzene and substituted derivatives	Benzene and substituted derivatives	C26H42O3	3	0.7138	-	32558.7	38590.2	38452.3	38000.4	32342.8	45551.6	0.296591	0.659829	0.760992	0.945694	-0.0805551	insig
MW0143002	4-Hydroxy-3-iodophenylpyruvic acid	Benzene and substituted derivatives	Benzene and substituted derivatives	C9H7IO4	3	0.7109	-	71484.7	77612.2	72469.1	9390	12044.9	8879.35	1.40026	8.36808e-05	0.00257855	7.30898	2.86967	up
MEDP1678	Thr-Val-Leu	Amino acids and derivatives	Amino acids and derivatives	C15H29N3O5	3	0.7107	-	5046.48	121.07	349.17	16991.1	8798.03	140.49	0.534823	0.295066	0.463428	0.212757	-2.23272	insig
MW0162710	[(2R,3S,4R,5R)-5-(5,6-dimethylbenzimidazol-1-yl)-3,4-dihydroxyoxolan-2-yl]methyl phosphate	Others	Others	C14H17N2O7P-2	3	0.7103	-	5393.05	1718.82	4874.31	35078.4	34974.9	33716.3	1.33933	0.000391577	0.00618158	0.115508	-3.11394	down
MW0106024	(2S)-2-[[(2R,3R)-3-azaniumyl-2-hydroxy-4-phenylbutanoyl]amino]-4-methylpentanoate	Amino acids and derivatives	Amino acids and derivatives	C16H24N2O4	3	0.708	-	8718.79	7291.74	8392.44	4039.7	5831.54	7814.72	0.938625	0.165708	0.317015	1.37979	0.464452	insig
MW0144275	Acetyl-maltose	Others	Saccharides	C14H24O12	3	0.7038	-	45718.7	42539.7	52582.7	55109.9	58101.1	44693.4	0.680401	0.326734	0.49396	0.891939	-0.164983	insig
MW0010565	(14R,27R)-22,33-dimethoxy-13,28-dimethyl-2,5,7,20-tetraoxa-13,28-diazaoctacyclo[25.6.2.216,19.13,10.121,25.04,8.031,35.014,39]nonatriaconta-1(33),3(39),4(8),9,16(38),17,19(37),21,23,25(36),31,34-dodecaene	Lignans and Coumarins	Lignans	C37H38N2O6	3	0.7037	-	6391.63	8534.15	6104.87	71458.4	34318.1	1.36486e+06	1.13254	0.384453	0.546777	0.0143004	-6.1278	down
MW0127534	N-(3-hydroxypropyl)-2-[1-methyl-3-(phenylsulfanyl)-1H-indol-2-yl]acetamide	Alcohol and amines	Amines	C20H22N2O2S	3	0.7023	-	3400.82	1082.26	3564.82	1912.81	269.67	438.98	0.971875	0.143174	0.286918	3.07001	1.61824	insig
MW0163406	1-Ammonio-1-deoxy-scyllo-inositol	Others	Others	C6H14NO5+	3	0.7023	-	6.40686e+06	6.32132e+06	6.66532e+06	8.2502e+06	7.40853e+06	7.69385e+06	1.31493	0.0208002	0.0730453	0.830465	-0.268009	insig
MW0161781	alpha-Ketosuberate	Others	Lactones	C8H10O5-2	3	0.7011	-	4485.94	5794.53	4282.39	5985.83	1244.14	5895.43	0.394441	0.793355	0.857596	1.10952	0.149932	insig
MW0009706	N-[3-[(2-oxo-1-naphthalenylidene)methylamino]phenyl]-2-phenylpropanamide	Benzene and substituted derivatives	Benzene and substituted derivatives	C26H22N2O2	3	0.7006	-	4853.1	4721.02	4664.26	10.98	48.05	3195.41	1.03519	0.0735789	0.177434	4.37506	2.1293	up
MW0107958	L-thiocitrulline	Amino acids and derivatives	Amino acids and derivatives	C6H13N3O2S	3	0.6997	-	57.51	181.49	37.36	214.55	21.71	134.84	0.132883	0.683904	0.777856	0.744705	-0.425259	insig
MW0145479	Arg-Pro-Gly	Amino acids and derivatives	Amino acids and derivatives	C13H24N6O4	3	0.6995	-	3113.85	6474.34	3205.38	5359.77	10259.8	7425.83	0.99907	0.134704	0.275978	0.555148	-0.849057	insig
MW0155144	Phe-Cys-Gly	Amino acids and derivatives	Amino acids and derivatives	C14H19N3O4S1	3	0.6985	-	123.34	202.16	174.87	189.55	657.96	309.06	0.956723	0.258125	0.425669	0.432633	-1.20879	insig
MW0144701	Ala-Phe-Tyr	Amino acids and derivatives	Amino acids and derivatives	C21H25N3O5	3	0.6981	-	2150.91	102.91	142.22	53.21	1275.08	93.61	0.268637	0.705285	0.79411	1.6851	0.752832	insig
MW0149850	Gln-Val-Ala	Amino acids and derivatives	Amino acids and derivatives	C13H24N4O5	3	0.6974	-	30919.5	27681.2	29099.5	16256.4	32505.6	32064.9	0.37866	0.711793	0.797651	1.08504	0.117746	insig
MW0144505	Ala-Asn-Val	Amino acids and derivatives	Amino acids and derivatives	C12H22N4O5	3	0.6972	-	13719.6	9712.41	56489.4	8346.14	10708.2	11656.6	0.725699	0.38749	0.548581	2.60238	1.37983	insig
MW0142293	2D-5-O-methyl-2,3,5/4,6-pentahydroxycyclohexanone	Others	Ketone compounds	C7H12O6	3	0.6971	-	52223.6	62924.2	72253.3	91052.3	75565	75875.7	1.06925	0.0770991	0.182754	0.772811	-0.371813	insig
pmp001106	Vitexin-2''-O-glucoside	Flavonoids	Flavones	C27H30O16	3	0.6964	-	219.95	18.14	172.64	408.55	103.48	25.2	0.091887	0.770042	0.841346	0.764533	-0.38735	insig
MW0144625	Ala-Ile-Tyr	Amino acids and derivatives	Amino acids and derivatives	C18H27N3O5	3	0.6961	-	2325.95	3790.36	3911.05	12273.3	4969.24	9461.31	1.16639	0.113451	0.244225	0.375502	-1.41311	down
MW0105669	Arg-Phe-Arg	Amino acids and derivatives	Amino acids and derivatives	C21H35N9O4	3	0.6958	-	72351.9	80670	65156.3	136090	165385	150979	1.37108	0.00366053	0.0233903	0.482211	-1.05226	down
MW0158460	Tyr-Glu-Ile	Amino acids and derivatives	Amino acids and derivatives	C20H29N3O7	3	0.6957	-	1393.01	1489.26	636.18	6303.73	6518.52	3147.63	1.27189	0.0551859	0.144393	0.220318	-2.18234	down
MW0150942	His-Gly-Met	Amino acids and derivatives	Amino acids and derivatives	C13H21N5O4S1	3	0.6954	-	2490.37	2393.85	1717.08	692.28	414.06	1473.27	1.13723	0.0313997	0.0967916	2.55903	1.3556	up
MW0152599	Leu-Enkephalin,amide	Amino acids and derivatives	Amino acids and derivatives	C28H38N6O6	3	0.6954	-	13504.2	6283.47	30432.8	11118.3	9184.46	1482.75	0.723345	0.318018	0.485963	2.30522	1.20491	insig
MW0148597	Disinomenine	Alkaloids	Isoquinoline alkaloids	C38H44N2O8	3	0.695	-	395.16	97.76	201.92	222.44	322.5	127.15	0.0761419	0.945815	0.968146	1.03385	0.0480264	insig
MW0156778	Ser-His-Met	Amino acids and derivatives	Amino acids and derivatives	C14H23N5O5S1	3	0.6945	-	372860	348698	375905	220624	190527	211976	1.38533	0.000220887	0.00459081	1.76122	0.816574	insig
MW0158468	Tyr-Gly-Ala	Amino acids and derivatives	Amino acids and derivatives	C14H19N3O5	3	0.6942	-	41699.6	50110.6	45165.3	30805.7	30018.1	37719.2	1.23809	0.0207032	0.0728405	1.39001	0.475093	insig
MW0155887	Pro-His-Trp	Amino acids and derivatives	Amino acids and derivatives	C22H26N6O4	3	0.694	-	50.44	347.6	234.57	517.67	902.93	46.59	0.349578	0.381077	0.543894	0.431171	-1.21367	insig
MW0149698	Gln-Gly-Tyr	Amino acids and derivatives	Amino acids and derivatives	C16H22N4O6	3	0.6939	-	938.81	1366.57	826.21	3603.39	2951.6	2610.25	1.33745	0.00795008	0.0384811	0.341681	-1.54928	down
MW0146325	Asp-Val-Ser	Amino acids and derivatives	Amino acids and derivatives	C12H21N3O7	3	0.6937	-	6174.44	6662.06	6371.8	20776.8	22203.8	20185.4	1.40421	0.00101205	0.0105714	0.304092	-1.71742	down
MW0109328	Pro-Met-Lys	Amino acids and derivatives	Amino acids and derivatives	C16H30N4O4S1	3	0.693	-	6932.28	9993.95	4706.79	10741.7	1180.33	13930.3	0.174771	0.758628	0.83505	0.836792	-0.257059	insig
MW0106810	Gln-Cys	Amino acids and derivatives	Amino acids and derivatives	C8H15N3O4S1	3	0.6921	-	294877	282132	317665	188756	178504	166902	1.38121	0.00145907	0.0130155	1.67491	0.744086	insig
MW0150525	Gly-Tyr-Val	Amino acids and derivatives	Amino acids and derivatives	C16H23N3O5	3	0.6915	-	40588.5	37329.3	39393.1	62390.7	59404.4	55801.9	1.38094	0.0027363	0.0194762	0.660545	-0.598271	insig
MW0144011	8(9)-EET methyl ester	FA	Others	C21H34O3	3	0.6913	-	202531	196415	173919	317339	330835	338663	1.38346	0.000369643	0.00605547	0.580505	-0.784618	insig
MW0155920	Pro-Lys-Ala	Amino acids and derivatives	Amino acids and derivatives	C14H26N4O4	3	0.691	-	1259.38	1089.56	124.89	19470.4	146.94	750.49	0.35611	0.446368	0.592805	0.121458	-3.04147	insig
MW0140185	(10aS)-10,10a-dihydrophenazine-1-carboxylic acid	Organic acids	Organic acids	C13H10N2O2	3	0.6909	-	2170.18	7014.09	3579.56	8928.71	9130.13	9299.1	1.11152	0.0766233	0.182161	0.466549	-1.0999	down
MW0141993	2,3-Bis-O-(geranylgeranyl)-sn-glycero-1-phospho-L-serine	GL	TG	C46H78NO8P	3	0.6905	-	249684	323022	235296	1.10857e+06	941441	470373	1.25029	0.09333	0.211527	0.320587	-1.64121	down
MW0112031	Suprofen methyl ester	Organic acids	Organic acids	C15H14O3S	3	0.6904	-	1106.32	3969.36	4153.63	54392.6	76429.4	54948.4	1.35274	0.0135969	0.0550428	0.0496813	-4.33115	down
MW0161482	(2R,3S,4S,5R)-2-(hydroxymethyl)-6-[4-[(E)-3-hydroxyprop-1-enyl]-2,6-dimethoxyphenoxy]oxane-3,4,5-triol	Alcohol and amines	Alcohols	C17H24O9	3	0.6895	-	6420.34	6815.66	7805.62	7041.99	2040.43	7034.18	0.615116	0.430146	0.581926	1.30559	0.384698	insig
MW0109333	Pro-Pro-Arg	Amino acids and derivatives	Amino acids and derivatives	C16H28N6O4	3	0.6894	-	3168.09	610.54	2669.49	1306.29	1843.45	516.82	0.484077	0.367898	0.531482	1.75863	0.814451	insig
MW0150499	Gly-Thr-Trp	Amino acids and derivatives	Amino acids and derivatives	C17H22N4O5	3	0.6889	-	2355.97	8475.84	12561.3	131765	122197	131507	1.33343	1.01204e-05	0.000952896	0.0606875	-4.04246	down
MW0153006	Lys-Ile-Cys	Amino acids and derivatives	Amino acids and derivatives	C15H30N4O4S1	3	0.6889	-	40411	81090.1	87329.8	85352	80635.9	83105.1	0.596974	0.458142	0.603078	0.838365	-0.254349	insig
MW0166724	4-(Isobutanoyl)sucrose	Others	Lactones	C16H28O12	3	0.6888	-	693.47	776.36	991.47	862.18	742.16	1421.82	0.51985	0.474698	0.617414	0.813341	-0.298068	insig
MW0148088	Cys-Val-Glu	Amino acids and derivatives	Amino acids and derivatives	C13H23N3O6S1	3	0.6887	-	3619.93	5020.65	4539.39	1197.11	4559.63	773.17	0.949228	0.197873	0.35592	2.0184	1.01321	insig
MW0153542	Met-Glu-Gly	Amino acids and derivatives	Amino acids and derivatives	C12H21N3O6S1	3	0.6881	-	25326.2	35269.3	42609.8	1530.65	2173.8	1519.77	1.3953	0.0225439	0.0768363	19.7552	4.30416	up
MW0156052	Pro-Val-Met	Amino acids and derivatives	Amino acids and derivatives	C15H27N3O4S1	3	0.6881	-	610.21	213.97	1411.48	981.21	973.33	756.32	0.536302	0.699723	0.789853	0.824705	-0.27805	insig
ZINC6041333	(2S,3S,8aS,11S,12S,15aS)-2,12-Dihydroxy-7,15a-diisopropyl-20,20,21,21-tetramethyl-2,3:11,12-bisbutano-2,3,4,5,9,10,11,12,13,14,15,15a-dodecahydro-1H,8aH-8,16-dioxadicyclohepta[a,h]anthracene-14,15-dione	Others	Ketone compounds	C40H56O6	3	0.6875	-	948.01	374.73	839.21	446.32	243.66	4998.72	0.144207	0.528559	0.661437	0.380043	-1.39577	insig
MW0130741	2-Ethoxycarbonyl-2-hydroxy-5,7-dimethoxyisoflavanone	Others	Ketone compounds	C20H20O7	3	0.6875	-	19615.9	21632	14201.2	68513.2	78311.5	77995.2	1.38188	0.000277026	0.00521947	0.246638	-2.01953	down
MW0157636	Thr-Glu-Met	Amino acids and derivatives	Amino acids and derivatives	C14H25N3O7S1	3	0.6863	-	1260.2	816.58	689.74	500.07	1638.78	1566.58	0.3149	0.500476	0.639594	0.746612	-0.421569	insig
MW0150466	Gly-Pro-His	Amino acids and derivatives	Amino acids and derivatives	C13H19N5O4	3	0.6857	-	27457.5	14721.8	11743.3	30101.6	16906.9	34687.6	0.768951	0.267711	0.43663	0.660039	-0.599376	insig
MW0158409	Tyr-Asp-Asp	Amino acids and derivatives	Amino acids and derivatives	C17H21N3O9	3	0.6848	-	81.85	218.77	130.26	212.43	185.55	36.06	0.180078	0.988439	0.992377	0.99272	-0.0105419	insig
MW0151658	Ile-Val-Trp	Amino acids and derivatives	Amino acids and derivatives	C22H32N4O4	3	0.6847	-	191.21	1111.62	1351.45	794.73	265.4	406.99	0.389132	0.387814	0.548847	1.80918	0.855334	insig
MW0162006	Phosphatidylinositol 4-phosphate	GL	DG	C11H20O16P2	3	0.6835	-	254204	240538	259022	63541.5	77601.5	69414.7	1.40037	2.5314e-05	0.00147922	3.57984	1.8399	up
MW0155945	Pro-Met-Leu	Amino acids and derivatives	Amino acids and derivatives	C16H29N3O4S1	3	0.6831	-	213094	177540	195365	231871	222820	237711	1.17372	0.058011	0.149586	0.846327	-0.240712	insig
MW0145270	Arg-Asn-Gln	Amino acids and derivatives	Amino acids and derivatives	C15H28N8O6	3	0.6828	-	483.61	197	336.5	428.68	88.29	210.55	0.565989	0.498591	0.637792	1.39805	0.483417	insig
MW0110195	Tyr-Gln-Lys	Amino acids and derivatives	Amino acids and derivatives	C20H31N5O6	3	0.6825	-	10753.9	11916.5	10998.6	12740.6	12080.4	11568.9	0.959543	0.138047	0.280831	0.925227	-0.112121	insig
MW0161952	5-Ureidoimidazole-4-carboxylate	Organic acids	Organic acids	C5H5N4O3-	3	0.6822	-	14515.4	15097.5	12598.2	7449.38	5540.53	4533.49	1.32963	0.00207454	0.0166624	2.40884	1.26834	up
MW0168269	Podocarpa-8,11,13-trien-16-oic acid, 12-hydroxy-	Terpenoids	Ditepenoids	C17H22O3	3	0.682	-	1784.75	885.1	825.74	1715.81	611.75	1703.29	0.175116	0.729317	0.811425	0.867209	-0.205548	insig
MW0149792	Gln-Pro-Leu	Amino acids and derivatives	Amino acids and derivatives	C16H28N4O5	3	0.6806	-	13824.2	11566.4	947.66	28499.5	17069.1	31556.4	0.923073	0.0468258	0.127396	0.341501	-1.55004	insig
ZINC101269056	Rhamnazin 3-O-sulfate	Flavonoids	Flavonols	C17H14O10S	3	0.6802	-	4687.68	2749.22	3753.97	23009.6	28904.1	24952.7	1.38614	0.00328839	0.0218792	0.145588	-2.78003	down
MW0151116	His-Trp-Phe	Amino acids and derivatives	Amino acids and derivatives	C26H28N6O4	3	0.6797	-	7401.75	2572.38	4148.93	9225.79	8860.38	12574.2	1.1203	0.0424024	0.119641	0.46063	-1.11832	down
MW0162231	3,8'-Biflaviolin 2,2'-diolate	Benzene and substituted derivatives	Benzene and substituted derivatives	C20H8O10-2	3	0.6788	-	31498.8	36924.4	39948.4	35768	40238.2	50434.6	0.72771	0.31	0.477615	0.857095	-0.222474	insig
MW0148282	deoxylimonoic acid D-ring-lactone	Others	Ketone compounds	C26H34O9	3	0.6787	-	4617.62	1986.85	7182.32	3558.73	2845.06	5174.58	0.128887	0.687727	0.781251	1.19074	0.251854	insig
MW0110193	Tyr-Cys-Lys	Amino acids and derivatives	Amino acids and derivatives	C18H28N4O5S1	3	0.6784	-	28577.7	22064.2	26825.4	23778.9	23208.8	21644	0.806081	0.265969	0.434693	1.12874	0.17471	insig
MW0153867	Met-Met	Amino acids and derivatives	Amino acids and derivatives	C10H20N2O3S2	3	0.6779	-	3999.24	10885	10686.6	17847.7	96.62	17078.7	0.354208	0.652272	0.754435	0.730115	-0.453804	insig
ZINC95911351	(20S)-3beta-(Tigloylamino)-20-(methylamino)-16alpha,17alpha-epoxy-5alpha-pregna-2-ene-4-one	Alcohol and amines	Amines	C27H40N2O3	3	0.6778	-	202864	188120	207823	361383	349575	322547	1.38812	0.00154506	0.0134862	0.579394	-0.787384	insig
MW0148610	Ditrans,polycis-heptaprenyl diphosphate	Organic acids	Organic acids	C35H60O7P2	3	0.6773	-	712.57	45.71	976.55	269.76	176.74	327.44	0.167085	0.366846	0.530532	2.24156	1.1645	insig
MW0162939	[3-[(9Z,12Z)-octadeca-9,12-dienoyl]oxy-2-[(9Z,12Z,15Z)-octadeca-9,12,15-trienoyl]oxypropyl] 2-(trimethylazaniumyl)ethyl phosphate	GP	PC	C44H78NO8P	3	0.6761	-	38359.6	45962.5	45452.6	106849	70333.4	3834.95	0.224592	0.628583	0.738046	0.71692	-0.480116	insig
MW0109631	Ser-Phe-Lys	Amino acids and derivatives	Amino acids and derivatives	C18H28N4O5	3	0.676	-	722151	754148	693108	876938	853329	878587	1.35387	0.0059754	0.0319958	0.831556	-0.266115	insig
MW0157711	Thr-Leu-Thr	Amino acids and derivatives	Amino acids and derivatives	C14H27N3O6	3	0.6757	-	1230.47	4960.09	4338.47	164.6	2702.85	4546.93	0.504046	0.578096	0.695371	1.42008	0.505975	insig
MW0143628	5-Hydroxy-2,4-dioxopentanoic acid	Organic acids	Organic acids	C5H6O5	3	0.6756	-	157141	97827.5	147097	396237	410466	411516	1.36048	0.00273885	0.0194762	0.330044	-1.59927	down
MW0107091	Gly-Ser-Lys	Amino acids and derivatives	Amino acids and derivatives	C11H22N4O5	3	0.6736	-	5208.08	156.8	3891.76	6638.83	5236.51	6051.49	0.743025	0.190185	0.347138	0.516357	-0.95356	insig
MW0145756	Asn-Gly-Phe	Amino acids and derivatives	Amino acids and derivatives	C15H20N4O5	3	0.6713	-	7053.4	5216.77	7482.56	8358.67	3270.86	7123.21	0.255733	0.856489	0.903312	1.05333	0.0749507	insig
MW0157847	Thr-Tyr-Phe	Amino acids and derivatives	Amino acids and derivatives	C22H27N3O6	3	0.6711	-	405714	403278	402235	509582	483490	475135	1.37416	0.0136737	0.0552428	0.824971	-0.277585	insig
MW0145719	Asn-Gln-Cys	Amino acids and derivatives	Amino acids and derivatives	C12H21N5O6S1	3	0.6692	-	1166.14	962.67	22.05	670.13	725.47	1395.9	0.545311	0.643701	0.749466	0.770503	-0.376127	insig
MW0148768	dTDP-alpha-D-forosamine	Nucleotides and derivatives	Nucleotides and derivatives	C18H31N3O12P2	3	0.6692	-	338.81	359.2	309.1	7603.18	8104.33	6808.73	1.40549	0.0027229	0.0194658	0.0447282	-4.48267	down
MW0159093	Val-Lys-Ile	Amino acids and derivatives	Amino acids and derivatives	C17H34N4O4	3	0.6686	-	2828.02	965.78	2488.4	6170.08	7144.14	7623.08	1.24306	0.00316351	0.0211882	0.300048	-1.73673	down
MW0148736	dTDP-4-amino-2,3,4,6-tetradeoxy-D-glucose	Nucleotides and derivatives	Nucleotides and derivatives	C16H27N3O12P2	3	0.6676	-	1.04318e+06	849490	903752	150.07	583.88	36480.5	1.25243	0.00284472	0.0198785	75.1434	6.23157	up
MW0156948	Ser-Tyr-Asn	Amino acids and derivatives	Amino acids and derivatives	C16H22N4O7	3	0.6672	-	1801.1	2880.23	4898.93	11113.7	13064.9	12071.3	1.29903	0.00240432	0.0180862	0.264284	-1.91984	down
MW0152285	Leu-Gln-Asp	Amino acids and derivatives	Amino acids and derivatives	C15H26N4O7	3	0.6662	-	311.55	399.59	46.52	747.72	322.36	963.2	0.888661	0.1393	0.282667	0.372629	-1.42419	insig
MW0150358	Gly-Glu-Ser	Amino acids and derivatives	Amino acids and derivatives	C10H17N3O7	3	0.6656	-	25457.1	22733.9	20044.6	40157.5	39092	35830.3	1.35031	0.0017602	0.0146635	0.592942	-0.754036	insig
MW0148082	Cys-Tyr-Asp	Amino acids and derivatives	Amino acids and derivatives	C16H21N3O7S1	3	0.6653	-	1014.36	830.31	973.52	868.63	568.75	1048.46	0.523105	0.522322	0.65628	1.1337	0.181035	insig
MW0139822	Theaflavin monogallates	Tannins	Proanthocyanidins	C36H28O16	3	0.665	-	332.35	395.76	297.84	644.11	21.5	751.02	0.261854	0.625728	0.735978	0.724219	-0.465503	insig
MW0147466	Chrysanthetriol	Terpenoids	Sesquiterpenoids	C15H26O3	3	0.6643	-	443.7	1202.46	1808.02	29643.7	41164.1	47811.1	1.36762	0.0181312	0.0668235	0.02912	-5.10185	down
MW0109103	Phe-Gln-Arg	Amino acids and derivatives	Amino acids and derivatives	C20H31N7O5	3	0.6638	-	632.98	2850.84	119.89	34.55	401.87	112.29	0.815573	0.347972	0.513551	6.5676	2.71537	insig
MW0145310	Arg-Cys-Gln	Amino acids and derivatives	Amino acids and derivatives	C14H27N7O5S1	3	0.6637	-	2317.81	5441.59	7011.75	877.39	5014.84	5670.46	0.413632	0.627701	0.737439	1.27748	0.353305	insig
MW0153484	Met-Ala-Glu	Amino acids and derivatives	Amino acids and derivatives	C13H23N3O6S1	3	0.6628	-	802.39	190.74	1097.57	1376.68	132.12	2614.34	0.22881	0.451317	0.59741	0.507065	-0.979757	insig
MW0116346	3-[(E)-(2-nitrophenyl)methylideneamino]imidazolidine-2,4-dione	Benzene and substituted derivatives	Benzene and substituted derivatives	C10H8N4O4	3	0.6617	-	13176.2	12950.1	12175.4	11419.2	8886.55	9787.94	1.19199	0.0505539	0.134543	1.27275	0.347947	insig
MW0153677	Met-Thr-His	Amino acids and derivatives	Amino acids and derivatives	C15H25N5O5S1	3	0.6615	-	1228.09	488.25	126.18	632.36	562.05	963.51	0.488141	0.784781	0.850419	0.853841	-0.227961	insig
ZINC95912566	[(8S,9S,10S,11R)-11-acetyloxy-9-hydroxy-3,4,5,19-tetramethoxy-9,10-dimethyl-15,17-dioxatetracyclo[10.7.0.02,7.014,18]nonadeca-1(19),2,4,6,12,14(18)-hexaen-8-yl] (Z)-2-methylbut-2-enoate	Others	Lactones	C30H36O11	3	0.6612	-	117.7	228.53	193.75	364.66	123.68	259.04	0.474485	0.439004	0.588424	0.722497	-0.468936	insig
MW0144784	Ala-Tyr-Trp	Amino acids and derivatives	Amino acids and derivatives	C23H26N4O5	3	0.6591	-	2608.09	684.11	955.87	4236.94	3245.3	3103.27	1.11488	0.0510624	0.135628	0.40131	-1.31721	down
MW0150088	Glu-Met-Gln	Amino acids and derivatives	Amino acids and derivatives	C15H26N4O7S1	3	0.6589	-	21397.5	20567.6	23037.8	37141.1	43889.4	56578.4	1.32949	0.049148	0.132022	0.472374	-1.082	down
MW0107077	Gly-Leu-Met	Amino acids and derivatives	Amino acids and derivatives	C13H25N3O4S1	3	0.6584	-	572.79	294.66	87.59	80.52	407.9	654.11	0.102931	0.788607	0.85383	0.835899	-0.258599	insig
MW0151412	Ile-Glu-Cys	Amino acids and derivatives	Amino acids and derivatives	C14H25N3O6S1	3	0.6577	-	1091.05	189.67	97.15	2093.15	74.77	3094.13	0.504342	0.279796	0.447852	0.26185	-1.93319	insig
MW0142541	2-Oxo-7-methylthioheptanoic acid	Organic acids	Organic acids	C8H14O3S	3	0.6576	-	514.32	84.21	237.6	234.82	63.24	326.09	0.239277	0.661888	0.762931	1.33963	0.421834	insig
MW0150357	Gly-Glu-Met	Amino acids and derivatives	Amino acids and derivatives	C12H21N3O6S1	3	0.6575	-	125.48	1341.44	1225.55	378.51	140.42	142.82	0.769863	0.2194	0.379926	4.06871	2.02457	insig
MW0148074	Cys-Trp-Ala	Amino acids and derivatives	Amino acids and derivatives	C17H22N4O4S1	3	0.6572	-	3147.48	2542.54	2421.76	2192.03	1142.26	2720.8	0.7563	0.278713	0.447005	1.33966	0.42187	insig
MEDL00427	Phe-Leu-Leu	Amino acids and derivatives	Amino acids and derivatives	C21H33N3O4	3	0.6569	-	367.52	66.16	88.92	124.79	41.34	144.12	0.365099	0.547966	0.673509	1.68445	0.752276	insig
MW0106259	Cys-His-Lys	Amino acids and derivatives	Amino acids and derivatives	C15H26N6O4S1	3	0.6564	-	262.85	1737.48	182.26	708.94	959.99	1047.36	0.633724	0.760784	0.836441	0.803519	-0.315596	insig
MW0156727	Ser-Glu-Gln	Amino acids and derivatives	Amino acids and derivatives	C13H22N4O8	3	0.6561	-	120870	143880	161465	333597	267654	228174	1.29765	0.0353856	0.105648	0.513868	-0.96053	insig
MW0150399	Gly-Leu-Asn	Amino acids and derivatives	Amino acids and derivatives	C12H22N4O5	3	0.6536	-	4562.97	4336.01	5254.2	4139.21	1908.62	3283.33	0.982828	0.117037	0.249293	1.51677	0.600998	insig
MW0153627	Met-Phe-Asp	Amino acids and derivatives	Amino acids and derivatives	C18H25N3O6S1	3	0.6535	-	9839.5	29593.8	31169.7	40287	43041.6	32714.8	0.873905	0.144884	0.288656	0.608419	-0.716862	insig
MW0150087	Glu-Met-Asp	Amino acids and derivatives	Amino acids and derivatives	C14H23N3O8S1	3	0.6535	-	215.91	423.29	416.35	1013.13	232.73	881.55	0.674458	0.273867	0.44183	0.496167	-1.0111	insig
MW0156681	Ser-Asp-Ile	Amino acids and derivatives	Amino acids and derivatives	C13H23N3O7	3	0.6525	-	11631.2	3527.76	13267.4	22382.2	23659.3	19896.8	1.06716	0.040505	0.115909	0.431106	-1.21389	down
MW0149642	Gln-Asp-Asn	Amino acids and derivatives	Amino acids and derivatives	C13H21N5O8	3	0.6522	-	1076.57	744.57	625.52	535.18	137.4	873.8	0.718297	0.310469	0.477989	1.58219	0.661919	insig
MW0141031	[(2R,3S,4R,5R)-5-[5-amino-4-[(4-amino-4-oxo-butanoyl)amino]imidazol-1-yl]-3,4-dihydroxy-tetrahydrofuran-2-yl]methyl dihydrogen phosphate	Alcohol and amines	Amines	C12H20N5O9P	3	0.6515	-	37345	42781.5	41394.3	17363.7	21132.1	3824.83	1.07484	0.0285956	0.0914301	2.87143	1.52177	up
MW0159006	Val-Gly-Ala	Amino acids and derivatives	Amino acids and derivatives	C10H19N3O4	3	0.6513	-	118581	125823	127378	137357	118725	117459	0.0350519	0.938879	0.962757	0.995289	-0.00681294	insig
MW0141813	2-[hydroxy-[2-hydroxy-3-[(Z)-octadec-9-enoyl]oxypropoxy]phosphoryl]oxyethyl-trimethylazanium	GP	PC	C26H53NO7P+	3	0.6506	-	382723	345285	418203	783828	740529	14522.1	0.323578	0.652683	0.754495	0.744835	-0.425008	insig
MW0156958	Ser-Tyr-Ile	Amino acids and derivatives	Amino acids and derivatives	C18H27N3O6	3	0.6503	-	165.5	1116.04	357.1	1527.4	92.04	101.58	0.323454	0.963594	0.977904	0.952133	-0.0707649	insig
MW0161020	(2S)-4-(2-aminophenyl)-2-azaniumyl-4-oxobutanoate	Others	Lactones	C10H12N2O3	3	0.6496	-	328.63	266.49	118.47	30.08	215.83	643.38	0.223743	0.784199	0.850199	0.802427	-0.317559	insig
MW0157811	Thr-Thr-Gln	Amino acids and derivatives	Amino acids and derivatives	C13H24N4O7	3	0.6494	-	444.66	25.02	64.42	777.23	71.37	688.72	0.703922	0.280365	0.448585	0.347423	-1.52524	insig
MW0154968	Pelargonidin 3-O-beta-D-glucoside 5-O-(6-coumaroyl-beta-D-glucoside)	Flavonoids	Anthocyanidins	C36H37O17+	3	0.6486	-	238.57	471.8	395.77	113581	156.96	80446	0.882836	0.196125	0.354201	0.00569635	-7.45575	insig
MW0158639	Tyr-Trp-Leu	Amino acids and derivatives	Amino acids and derivatives	C26H32N4O5	3	0.6483	-	1313.23	192.37	119.73	3952.46	619.26	3112.15	0.988178	0.170987	0.32246	0.211525	-2.2411	insig
MW0013335	(3beta)-26,27-Dinorcholest-5-en-24-yne-3,20-diol	Alcohol and amines	Alcohols	C25H38O2	3	0.6483	-	3011.37	4090.13	6320.62	20103	19614.2	23873.2	1.35445	0.000864664	0.00973834	0.211072	-2.2442	down
MW0168305	Methyl octadeca-5,9,12-trienoate	FA	Others	C19H32O2	3	0.6478	-	396593	408337	598544	480826	774131	569278	0.787924	0.271581	0.439986	0.769349	-0.378289	insig
MW0150992	His-Leu-Ile	Amino acids and derivatives	Amino acids and derivatives	C18H31N5O4	3	0.6475	-	1607.91	2245.25	1666.5	2081.16	2581.62	1584.32	0.43792	0.533272	0.665271	0.883556	-0.178607	insig
MW0151071	His-Pro-Val	Amino acids and derivatives	Amino acids and derivatives	C16H25N5O4	3	0.6471	-	40231.3	44821.6	46152.2	27258.2	32702.3	30422.9	1.32396	0.00492815	0.0283053	1.45165	0.537696	insig
MW0151150	His-Val-Leu	Amino acids and derivatives	Amino acids and derivatives	C17H29N5O4	3	0.6468	-	816711	741437	823627	1.16672e+06	1.13355e+06	1.13944e+06	1.38242	0.00220055	0.0172619	0.692433	-0.530253	insig
MW0148043	Cys-Met-Ala	Amino acids and derivatives	Amino acids and derivatives	C11H21N3O4S2	3	0.6464	-	301238	319196	295325	196719	185351	210614	1.37943	0.00046319	0.00686611	1.5451	0.627704	insig
MW0149934	Glu-Asn-Phe	Amino acids and derivatives	Amino acids and derivatives	C18H24N4O7	3	0.6462	-	3944.51	2378.63	4873.02	212.54	2293.69	305.61	1.09568	0.0486753	0.131189	3.98179	1.99342	up
MW0164941	2-oxo-3-sulfinopropanoate	Others	Others	C3H3O5S-	3	0.6452	-	11793.2	12775.2	9988.23	18581.2	12802.7	6723.69	0.0484154	0.765715	0.839327	0.90682	-0.141111	insig
MW0147890	Cyanidin 3-glucoside 5-caffeoylglucoside	Flavonoids	Anthocyanidins	C36H37O19+	3	0.645	-	119.46	103726	101825	89.35	534.53	119301	0.39107	0.614937	0.726891	1.71499	0.778197	insig
MW0144728	Ala-Ser-Glu	Amino acids and derivatives	Amino acids and derivatives	C11H19N3O7	3	0.645	-	1133.08	1538.64	918.95	184.43	1064.86	564.56	0.902241	0.139037	0.282416	1.97958	0.985198	insig
MW0108017	Lys-Pro-Lys	Amino acids and derivatives	Amino acids and derivatives	C17H33N5O4	3	0.6436	-	440619	479549	462204	332975	354048	197370	1.10753	0.0707457	0.172656	1.56308	0.644388	insig
MW0155942	Pro-Met-Gly	Amino acids and derivatives	Amino acids and derivatives	C12H21N3O4S1	3	0.6434	-	195.2	24.1	20	340.45	144.73	496.57	1.05623	0.120013	0.253213	0.243748	-2.03654	down
MW0148079	Cys-Trp-Val	Amino acids and derivatives	Amino acids and derivatives	C19H26N4O4S1	3	0.6429	-	195944	203192	196838	225464	98751.8	223543	0.373517	0.738516	0.818048	1.08802	0.12171	insig
MW0156876	Ser-Phe-Leu	Amino acids and derivatives	Amino acids and derivatives	C18H27N3O5	3	0.6418	-	31584.6	35829.5	11632.6	116557	126406	81223.5	1.25508	0.0126281	0.0520619	0.243832	-2.03604	down
MW0007067	ethyl 6,7-dimethoxy-4-oxo-2,3-dihydro-1H-naphthalene-2-carboxylate	Others	Lactones	C15H18O5	3	0.6412	-	15492.7	6426.93	13385.9	33957.3	23776.7	30712.2	1.20701	0.012302	0.0511887	0.399175	-1.32491	down
MW0157600	Thr-Cys-His	Amino acids and derivatives	Amino acids and derivatives	C13H21N5O5S1	3	0.6407	-	299538	324973	335349	441480	236670	427870	0.348442	0.539298	0.668238	0.86785	-0.204483	insig
MW0148717	dTDP-3-amino-3,4,6-trideoxy-alpha-D-glucose	Nucleotides and derivatives	Nucleotides and derivatives	C16H27N3O13P2	3	0.64	-	794.42	874.54	875.68	1133.45	272.01	77.3	0.801731	0.389261	0.550123	1.71615	0.779176	insig
MW0159902	2-Sulfanylethanesulfonate	Organic acids	Organic acids	C2H5O3S2-	3	0.6399	-	15044.1	16211	9387.47	22754.5	16001.9	10278.8	0.388202	0.547803	0.673509	0.828844	-0.270827	insig
MW0151014	His-Lys-Leu	Amino acids and derivatives	Amino acids and derivatives	C18H32N6O4	3	0.6398	-	8453.21	6379.27	9194.82	3709.34	8484.53	6944.3	0.631505	0.388094	0.548858	1.25546	0.328222	insig
MW0149969	Glu-Gln-Asn	Amino acids and derivatives	Amino acids and derivatives	C14H23N5O8	3	0.6392	-	9405.64	9086.15	10174.1	19998.8	16257.5	16591.9	1.36744	0.0160125	0.0617233	0.542419	-0.882519	insig
MW0150028	Glu-His-Phe	Amino acids and derivatives	Amino acids and derivatives	C20H25N5O6	3	0.6386	-	11189.8	12975.6	14758.7	8157.34	8962.75	8498.7	1.30229	0.0440525	0.122915	1.51935	0.603459	insig
MW0158626	Tyr-Thr-Phe	Amino acids and derivatives	Amino acids and derivatives	C22H27N3O6	3	0.6383	-	88045.5	83173.6	63197.8	225572	236405	151379	1.32126	0.0338656	0.102282	0.382187	-1.38765	down
MW0149972	Glu-Gln-Gly	Amino acids and derivatives	Amino acids and derivatives	C12H20N4O7	3	0.6382	-	128781	122423	126088	174504	154255	176235	1.34306	0.0207544	0.072957	0.747121	-0.420585	insig
MW0148056	Cys-Phe-Ile	Amino acids and derivatives	Amino acids and derivatives	C18H27N3O4S1	3	0.6378	-	11600.5	14702.8	20299.8	16003.7	15362.6	16197.6	0.198781	0.911614	0.943678	0.979799	-0.0294417	insig
MW0151655	Ile-Val-Phe	Amino acids and derivatives	Amino acids and derivatives	C20H31N3O4	3	0.6366	-	2597.84	1396.14	1717.58	762.67	28.24	548.42	0.984767	0.0348311	0.104415	4.26449	2.09237	insig
MW0151573	Ile-Ser-Gln	Amino acids and derivatives	Amino acids and derivatives	C14H26N4O6	3	0.6353	-	67.25	253.62	326.63	186.37	529.42	15.36	0.25869	0.880026	0.919954	0.885591	-0.175287	insig
MW0010853	[(1R,6R,10S,11R,13S,15R)-1,6-dihydroxy-8-(hydroxymethyl)-4,12,12,15-tetramethyl-5-oxo-13-tetracyclo[8.5.0.02,6.011,13]pentadeca-3,8-dienyl] hexadecanoate	Benzene and substituted derivatives	Benzene and substituted derivatives	C36H58O6	3	0.6352	-	6897.64	573.78	7199.93	16863.8	404.62	11818.4	0.167816	0.438709	0.588253	0.504397	-0.987368	insig
MW0107729	Leu-Ile-Ile	Amino acids and derivatives	Amino acids and derivatives	C18H35N3O4	3	0.6351	-	5468.22	2950.31	413.49	256.9	811.95	1550.12	0.666222	0.289517	0.457699	3.37233	1.75374	insig
MW0123051	2-Methoxy-N-(3-Methyl-2-Oxo-1,2,3,4-Tetrahydroquinazolin-6-Yl)benzenesulfonamide	Alcohol and amines	Amines	C16H17N3O4S	3	0.6347	-	81472.7	89164.9	85370.9	67642.1	46906.3	57637.9	1.23917	0.0308916	0.0958115	1.48681	0.572221	insig
MW0150120	Glu-Pro-Gln	Amino acids and derivatives	Amino acids and derivatives	C15H24N4O7	3	0.6341	-	774889	714023	708254	885903	848259	958314	1.28211	0.0175957	0.0654481	0.816039	-0.29329	insig
MW0150868	His-Asp-Asn	Amino acids and derivatives	Amino acids and derivatives	C14H20N6O7	3	0.634	-	20567.8	2382.02	16045.1	6227.09	38658.7	44567.1	0.595631	0.295274	0.463428	0.435926	-1.19785	insig
MW0157171	Spinosyn P	Others	Lactones	C39H61NO10	3	0.6338	-	265437	252156	239824	669371	693939	645352	1.40301	0.00011171	0.00305319	0.377076	-1.40707	down
MW0000303	(1R,9R,13S,14S,16S)-13-ethyl-8-methyl-8,15-diazahexacyclo[14.2.1.01,9.02,7.010,15.012,17]nonadeca-2,4,6-triene-14,18-diol	Alkaloids	Alkaloids	C20H26N2O2	3	0.6335	-	8566.63	3963.78	637.81	3853.25	2826.27	4096.09	0.215586	0.76332	0.838156	1.22204	0.289291	insig
MW0156878	Ser-Phe-Phe	Amino acids and derivatives	Amino acids and derivatives	C21H25N3O5	3	0.6332	-	53297.7	50398.3	52011.5	43284.3	46882.4	43079.5	1.30283	0.0102883	0.0452866	1.16857	0.224744	insig
MEDN1422	8-Hydroxyeicosa-9,11,14-trienoic acid	Lipids	Free fatty acids	C20H34O3	3	0.6329	-	165125	190023	221563	226571	347193	226618	0.966702	0.196453	0.354406	0.720546	-0.472838	insig
MW0155295	Phe-Met-Tyr	Amino acids and derivatives	Amino acids and derivatives	C23H29N3O5S1	3	0.6327	-	1425.67	594.88	613.66	113.01	79.26	55.74	1.34565	0.100376	0.223107	10.6214	3.4089	up
MW0158459	Tyr-Glu-His	Amino acids and derivatives	Amino acids and derivatives	C20H25N5O7	3	0.6322	-	878.87	188.48	478.85	725.24	174.56	471.3	0.106767	0.831167	0.884705	1.12771	0.173393	insig
MW0151120	His-Tyr-Ala	Amino acids and derivatives	Amino acids and derivatives	C18H23N5O5	3	0.6317	-	46.89	2475.83	245.22	51.43	2568.42	2266.63	0.310233	0.559834	0.682195	0.566449	-0.819983	insig
MW0110361	Val-Phe-Arg	Amino acids and derivatives	Amino acids and derivatives	C20H32N6O4	3	0.6317	-	17119.5	20532.8	415.36	19906.4	16523.9	10555.5	0.535335	0.693651	0.785618	0.810193	-0.303662	insig
MW0158405	Tyr-Asp-Ala	Amino acids and derivatives	Amino acids and derivatives	C16H21N3O7	3	0.6308	-	18156.7	10527.1	9609.17	23685.1	44395.2	38216.9	1.24063	0.0490992	0.131979	0.360244	-1.47296	down
MW0149216	Flavonol 3-O-D-xylosylglucoside	Flavonoids	Flavonols	C26H28O12	3	0.6298	-	1323.75	65597.8	64443.4	841.43	92639.9	86407.6	0.0193719	0.68233	0.776716	0.730256	-0.453527	insig
MW0156739	Ser-Glu-Met	Amino acids and derivatives	Amino acids and derivatives	C13H23N3O7S1	3	0.6298	-	57467.1	55623.3	58044.5	55874.7	57492.7	47759.4	0.664044	0.384013	0.546538	1.06211	0.0869381	insig
MW0106898	Glu-Gln-Lys	Amino acids and derivatives	Amino acids and derivatives	C16H29N5O7	3	0.6293	-	10574.4	8501.88	8250.44	12572.1	11159.2	12317.7	1.19994	0.0377051	0.1106	0.758042	-0.399651	insig
MW0155390	Phe-Tyr-Phe	Amino acids and derivatives	Amino acids and derivatives	C27H29N3O5	3	0.6274	-	700.03	8758.79	8263.08	1608.34	3809.29	4976.17	0.133233	0.45534	0.600959	1.70505	0.76981	insig
MW0162904	(1S,2R,3S,4S,5R,6S)-2,4-bis{[amino(iminio)methyl]amino}-3,5,6-trihydroxycyclohexyl phosphate	Organic acids	Organic acids	C8H19N6O7P	3	0.6258	-	312.88	1954.16	64.56	4371.04	4360.35	3939.42	1.10739	0.0232587	0.0787859	0.184013	-2.44212	down
MW0151107	His-Trp-Ala	Amino acids and derivatives	Amino acids and derivatives	C20H24N6O4	3	0.6257	-	9765.68	10085.3	7243.05	3376.83	6538.6	4058.31	1.18232	0.0294595	0.0930883	1.93892	0.955256	insig
MW0154964	Pelargonidin 3-O-(6-caffeoyl-beta-D-glucoside)	Flavonoids	Anthocyanidins	C30H27O13+	3	0.6256	-	1529.08	1419.49	2217.99	4748.72	927.61	2298.66	0.345006	0.492746	0.633329	0.647845	-0.626279	insig
MW0150520	Gly-Tyr-Phe	Amino acids and derivatives	Amino acids and derivatives	C20H23N3O5	3	0.6253	-	41338.1	41377.7	45176.3	49103.3	50656.6	49666.7	1.30858	0.020353	0.0718594	0.855886	-0.22451	insig
MW0157598	Thr-Cys-Asp	Amino acids and derivatives	Amino acids and derivatives	C11H19N3O7S1	3	0.6248	-	1355.89	103.18	57.61	712.72	276.97	262.09	0.409029	0.859497	0.905537	1.21162	0.276936	insig
MW0153563	Met-His-Asn	Amino acids and derivatives	Amino acids and derivatives	C15H24N6O5S1	3	0.6245	-	1.98376e+06	1.96047e+06	1.97662e+06	2.58885e+06	2.36849e+06	2.26549e+06	1.30723	0.0444031	0.123386	0.81974	-0.286761	insig
MW0109101	Phe-Cys-Lys	Amino acids and derivatives	Amino acids and derivatives	C18H28N4O4S1	3	0.6245	-	31.54	429.29	539.69	611.05	286.77	1865.38	0.720547	0.347318	0.513551	0.362087	-1.46559	insig
ZINC95910636	1,3-dihydroxy-9-oxo-5-[(2S,3R,4S,5S,6R)-3,4,5-trihydroxy-6-(hydroxymethyl)oxan-2-yl]oxyxanthene-4-sulfonic acid	Organic acids	Organic acids	C19H18O13S	3	0.6244	-	673776	620765	518209	1.69622e+06	1.59842e+06	1.36895e+06	1.37642	0.00371351	0.0236163	0.388702	-1.36326	down
MW0153514	Met-Asp-Glu	Amino acids and derivatives	Amino acids and derivatives	C14H23N3O8S1	3	0.6241	-	28607.1	27795.3	25871.5	59936.3	61749.1	52532.7	1.39036	0.00523625	0.0293638	0.472246	-1.08239	down
MW0110059	Trp-Gln-Lys	Amino acids and derivatives	Amino acids and derivatives	C22H32N6O5	3	0.6238	-	1067.29	1325.68	466.21	585.01	748.48	143.91	0.764134	0.221552	0.382331	1.93528	0.952541	insig
MW0147560	cis-N-methyl-alpha-berbine	Alkaloids	Alkaloids	C18H20N+	3	0.6238	-	1507.84	7249.45	2215.92	86258	88028.4	86604.8	1.35534	0.000170976	0.00391689	0.0420605	-4.57139	down
MW0155416	Phe-Val-Trp	Amino acids and derivatives	Amino acids and derivatives	C25H30N4O4	3	0.6231	-	884471	851147	682819	1.68062e+06	1.56215e+06	1.73449e+06	1.36882	0.000552107	0.00772949	0.485897	-1.04128	down
MW0129831	12a-HYDROXY-5-DEOXYDEHYDROMUNDUSERONE	Others	Ketone compounds	C19H18O6	3	0.6227	-	103.67	358.07	474.86	3487	217.37	3724.11	0.884871	0.194932	0.352644	0.126082	-2.98756	insig
MW0142535	2-Oxo-3-(5-oxofuran-2-ylidene)propanoic acid	Others	Lactones	C7H4O5	3	0.6221	-	5.80418e+06	5.95655e+06	5.99979e+06	2.06648e+06	2.01073e+06	2.02991e+06	1.40636	8.85522e-05	0.00260615	2.90817	1.54011	up
MW0143952	7-Dehydrologanin tetraacetate	Others	Lactones	C25H32O14	3	0.6217	-	230.66	59.48	278.69	556.01	36.63	307.57	0.121649	0.552877	0.676541	0.631886	-0.662264	insig
MW0153118	Lys-Pro-Met	Amino acids and derivatives	Amino acids and derivatives	C16H30N4O4S1	3	0.6217	-	194218	199364	202216	258457	244866	249569	1.38734	0.00103611	0.0107118	0.791346	-0.337619	insig
MW0145928	Asn-Tyr-Gln	Amino acids and derivatives	Amino acids and derivatives	C18H25N5O7	3	0.6215	-	6518.14	9152.79	11030.1	12737.8	11432.7	7047.07	0.417977	0.527134	0.660678	0.855319	-0.225466	insig
MW0150199	Glu-Tyr-Trp	Amino acids and derivatives	Amino acids and derivatives	C25H28N4O7	3	0.6213	-	103645	91007.7	92760.1	107058	76924.1	87367.8	0.417229	0.621606	0.732627	1.0592	0.0829696	insig
MW0157754	Thr-Phe-Cys	Amino acids and derivatives	Amino acids and derivatives	C16H23N3O5S1	3	0.6206	-	75569.3	73003.6	38969.7	100143	87862	39087.3	0.296686	0.58785	0.703897	0.825844	-0.276058	insig
MW0169875	Stearidonic Acid ethyl ester	Lipids	Free fatty acids	C20H32O2	3	0.6194	-	5244.61	2935.62	1279.59	807.99	948.74	926.26	1.12816	0.188226	0.344968	3.52585	1.81797	up
MW0158925	Val-Asn-Trp	Amino acids and derivatives	Amino acids and derivatives	C20H27N5O5	3	0.6191	-	10000.6	10370.6	15061.8	8576.33	12094.7	5822.86	0.75633	0.289581	0.457699	1.3374	0.419433	insig
MW0166643	19-(4-Hydroxyphenyl)nonadecanoate	Lipids	Free fatty acids	C25H41O3-	3	0.619	-	227.39	1791.8	1286.81	681.95	1733.75	447.56	0.00204487	0.820234	0.87654	1.15463	0.207428	insig
ZINC42852588	Lonijaposide C	Organic acids	Organic acids	C24H30NO12+	3	0.6185	-	4212.23	8066.22	9960.35	18518	7789.52	14523.5	0.899725	0.177655	0.332546	0.544656	-0.876584	insig
MW0126657	Termitomycamide B	Alcohol and amines	Amines	C28H40N2O2	3	0.6182	-	1163.03	166.24	3078.38	246.98	2908.99	3613.96	0.277268	0.587883	0.703897	0.651063	-0.619131	insig
MW0156050	Pro-Val-Ile	Amino acids and derivatives	Amino acids and derivatives	C16H29N3O4	3	0.6172	-	491.92	973.89	228.04	163.45	337.8	142.9	0.930183	0.246157	0.411657	2.62959	1.39484	insig
MW0158359	Tyr-Ala-Met	Amino acids and derivatives	Amino acids and derivatives	C17H25N3O5S1	3	0.6172	-	114128	117222	117238	194929	188915	189837	1.40487	3.71746e-05	0.00176161	0.607633	-0.718729	insig
MW0140695	[3-(3,4-Methylenedioxyphenyl)-2-(mercaptomethyl)-1-oxoprolyl]glycine	Organic acids	Organic acids	C15H18N2O6S	3	0.6163	-	1701.35	977.68	172.17	3159.96	2076.12	2474.53	0.975017	0.0460803	0.126478	0.369776	-1.43528	insig
MW0158489	Tyr-His-Ser	Amino acids and derivatives	Amino acids and derivatives	C18H23N5O6	3	0.6161	-	51395.8	47708.2	53985.6	39156.3	37972.8	35987.1	1.3513	0.00757511	0.037202	1.35338	0.436571	insig
MW0156908	Ser-Ser-Gly	Amino acids and derivatives	Amino acids and derivatives	C8H15N3O6	3	0.6156	-	719.02	26.87	1122.6	1224.53	1080.12	935.89	0.698406	0.28689	0.454515	0.576598	-0.794361	insig
ZINC95911933	Hydrangenoside A	Benzene and substituted derivatives	Benzene and substituted derivatives	C31H40O13	3	0.6154	-	13095.8	11845.9	14731.6	31879.7	29533.4	32364.1	1.38916	0.000119276	0.00316422	0.423059	-1.24107	down
MW0140437	(5aS)-5,5a-dihydrophenazine-1,6-dicarboxylic acid	Organic acids	Organic acids	C14H10N2O4	3	0.6146	-	13233.1	84.32	10373.9	153741	140028	168042	1.10895	0.000596084	0.00798789	0.0513009	-4.28487	down
MW0150197	Glu-Tyr-Phe	Amino acids and derivatives	Amino acids and derivatives	C23H27N3O7	3	0.6142	-	5229.92	4030.33	2368.27	8410.63	7493.08	5985.69	1.12483	0.0361317	0.107515	0.53124	-0.912565	insig
MW0158450	Tyr-Glu-Asn	Amino acids and derivatives	Amino acids and derivatives	C18H24N4O8	3	0.6142	-	2887.98	1461.52	5137.71	1159.56	1118.55	532.3	1.11346	0.169114	0.320125	3.37574	1.7552	up
MW0156971	Ser-Val-Asp	Amino acids and derivatives	Amino acids and derivatives	C12H21N3O7	3	0.614	-	2475.77	1171.04	905.38	28540.4	12967	38185.4	1.34452	0.0756893	0.181025	0.0571217	-4.12982	down
MW0063799	Tetracosyl acetate	FA	Others	C26H52O2	3	0.6127	-	200045	200017	198623	101311	77462	92793.8	1.37958	0.0039359	0.0244246	2.20456	1.14049	up
MW0149991	Glu-Glu-Gln	Amino acids and derivatives	Amino acids and derivatives	C15H24N4O9	3	0.6124	-	150564	139859	140814	209512	190350	280381	1.23915	0.091554	0.208793	0.633945	-0.65757	insig
MW0142961	3-Hydroxy-6,7,8-trimethoxy-2-naphthoate	Benzene and substituted derivatives	Benzene and substituted derivatives	C14H14O6	3	0.6124	-	172.87	78.51	112.74	596.06	119.09	140.15	0.686251	0.403471	0.562516	0.425722	-1.23202	insig
MW0106903	Glu-Gly-Trp	Amino acids and derivatives	Amino acids and derivatives	C18H22N4O6	3	0.6123	-	109095	242182	81999.8	300049	120140	267328	0.700793	0.31807	0.485963	0.630205	-0.666108	insig
MW0145396	Arg-Ile-Phe	Amino acids and derivatives	Amino acids and derivatives	C21H34N6O4	3	0.6122	-	71.31	2114.72	2446.63	351.52	61.38	1850.91	0.334418	0.445849	0.592311	2.0464	1.03309	insig
MW0126734	Tetrahydrogambogic acid	Organic acids	Organic acids	C38H48O8	3	0.6121	-	98.04	47.89	344.56	1219.8	304.95	611.86	1.07172	0.168773	0.31975	0.229565	-2.12303	down
[truncated: 2,050 more rows]
