# Supplementary material
Source: Research Square preprint supplement (doi:10.21203/rs.3.rs-9447148/v1)
Supplement: Supplementary file 9 [file f31313a656e2f19dde54d0f6.xlsx]

## Sheet: Sheet1
Table S8 Correlation network visualization of Diterpenoid biosynthesis pathway in shoot
geneID	KO	KEGG_map_gene	mw_KO	mw_KEGG_map	metaID	Compounds	Class I	CID	KEGG_map_meta	coefficient	pvalue	relationType
LOC_Os11g41710	K16083	ko00904,ko01110	KM0222	MetMap130	MW0054123	Isopimaric acid	Terpenoids	C09118	ko00904,ko01110	0.943889	3.98515e-06	gene-meta
LOC_Os03g21419	K20666	ko00904,ko01100,ko01110	--	--	MW0054123	Isopimaric acid	Terpenoids	C09118	ko00904,ko01110	0.941765	4.78132e-06	gene-meta
LOC_Os09g10340	K16085	ko00904,ko01110	KM0208	MetMap126	MW0054123	Isopimaric acid	Terpenoids	C09118	ko00904,ko01110	0.948872	2.52438e-06	gene-meta
LOC_Os01g11150	K04125	ko00904,ko01110	KM0151	MetMap114,MetMap124	MW0054123	Isopimaric acid	Terpenoids	C09118	ko00904,ko01110	0.931994	1.02123e-05	gene-meta
LOC_Os05g43880	K04125	ko00904,ko01110	KM0297	MetMap158	MW0054123	Isopimaric acid	Terpenoids	C09118	ko00904,ko01110	0.956913	1.08782e-06	gene-meta
LOC_Os04g44150	K04125	ko00904,ko01110	KM0195	MetMap121	MW0054123	Isopimaric acid	Terpenoids	C09118	ko00904,ko01110	0.941928	4.71618e-06	gene-meta
LOC_Os06g19070	K21718	ko00904,ko01110	KM0148	MetMap107	MW0054123	Isopimaric acid	Terpenoids	C09118	ko00904,ko01110	0.886772	0.000120853	gene-meta
LOC_Os10g05490	K21718	ko00904,ko01110	KM0148	MetMap107	MW0054123	Isopimaric acid	Terpenoids	C09118	ko00904,ko01110	0.920372	2.20315e-05	gene-meta
LOC_Os01g08220	K04124	ko00904,ko01100,ko01110	KM0151	MetMap114,MetMap124	MW0054123	Isopimaric acid	Terpenoids	C09118	ko00904,ko01110	0.916579	2.76236e-05	gene-meta
LOC_Os11g41680	K16083	ko00904,ko01110	KM0222	MetMap130	MW0054123	Isopimaric acid	Terpenoids	C09118	ko00904,ko01110	0.905923	4.94677e-05	gene-meta
LOC_Os03g44740	K22640	ko00904	KM0148	MetMap107	MW0054123	Isopimaric acid	Terpenoids	C09118	ko00904,ko01110	0.880006	0.000159644	gene-meta
LOC_Os07g46930	K13070	ko00904,ko01110	KM0104	MetMap101	MW0054123	Isopimaric acid	Terpenoids	C09118	ko00904,ko01110	0.831546	0.000799214	gene-meta
LOC_Os05g34854	K05282	ko00904,ko01100,ko01110	KM0195	MetMap121	MW0168671	Abietic acid	Terpenoids	C06087	ko00904,ko01100,ko01110	-0.856873	0.000370126	gene-meta
LOC_Os08g39694	K16084	ko00904,ko01110	KM0208	MetMap126	MW0168671	Abietic acid	Terpenoids	C06087	ko00904,ko01100,ko01110	-0.810615	0.00138274	gene-meta
LOC_Os06g43430	K16083	ko00904,ko01110	KM0222	MetMap130	MW0168671	Abietic acid	Terpenoids	C06087	ko00904,ko01100,ko01110	-0.893187	9.12934e-05	gene-meta
LOC_Os02g09220	K21291	ko00904,ko01110	KM0222	MetMap130	MW0168671	Abietic acid	Terpenoids	C06087	ko00904,ko01100,ko01110	0.960975	6.67609e-07	gene-meta
LOC_Os04g09920	K16085	ko00904,ko01110	KM0222	MetMap130	MW0168671	Abietic acid	Terpenoids	C06087	ko00904,ko01100,ko01110	0.962143	5.74599e-07	gene-meta
LOC_Os10g30410	K16083	ko00904,ko01110	KM0222	MetMap130	MW0168671	Abietic acid	Terpenoids	C06087	ko00904,ko01100,ko01110	0.823201	0.00100276	gene-meta
LOC_Os11g32030	K13070	ko00904,ko01110	KM0104	MetMap101	MW0168671	Abietic acid	Terpenoids	C06087	ko00904,ko01100,ko01110	0.960845	6.78601e-07	gene-meta
LOC_Os02g17760	K21291	ko00904,ko01110	KM0222	MetMap130	MW0168671	Abietic acid	Terpenoids	C06087	ko00904,ko01100,ko01110	-0.874714	0.000196273	gene-meta
LOC_Os04g10160	K16085	ko00904,ko01110	KM0222	MetMap130	MW0168671	Abietic acid	Terpenoids	C06087	ko00904,ko01100,ko01110	0.874589	0.000197208	gene-meta
