# Supplementary material
Source: Research Square preprint supplement (doi:10.21203/rs.3.rs-9447148/v1)
Supplement: Supplementary file 10 [file fe419d9fcb4117e7165b5ff4.xlsx]

## Sheet: Sheet1
Table S4 DEGs identified between control conditions and salt conditions in root(CK_Root vs. Salt_Root)
ID	baseMean	CK_Root	Salt_Root	log2FoldChange	pvalue	padj	regulated
LOC_Os01g03340	4519.2	1081.28	7957.12	2.87912	0	0	up
LOC_Os01g03360	2192.12	170.123	4214.12	4.63042	0	0	up
LOC_Os01g03390	4247.81	183.726	8311.9	5.49475	0	0	up
LOC_Os01g03620	1640.19	2927.15	353.225	-3.05227	0	0	down
LOC_Os01g06310	2878.43	433.563	5323.3	3.6173	0	0	up
LOC_Os01g09030	2259.24	949.202	3569.29	1.90991	0	0	up
LOC_Os01g11240	1387.46	2411.05	363.868	-2.72886	0	0	down
LOC_Os01g11414	7948.17	11046.9	4849.4	-1.18804	0	0	down
LOC_Os01g15270	28916.5	12643.1	45190	1.8374	0	0	up
LOC_Os01g22352	892.313	120.103	1664.52	3.79101	0	0	up
LOC_Os01g24710	14339.7	1882.98	26796.3	3.83085	0	0	up
LOC_Os01g25280	1456.98	2742.36	171.598	-3.99709	0	0	down
LOC_Os01g32330	2183.1	921.68	3444.53	1.90074	0	0	up
LOC_Os01g32770	1159.03	317.188	2000.87	2.65382	0	0	up
LOC_Os01g45470	1795.65	3536.95	54.3427	-6.01873	0	0	down
LOC_Os01g47580	1613.11	3106.23	119.988	-4.69346	0	0	down
LOC_Os01g55510	983.587	89.6029	1877.57	4.38851	0	0	up
LOC_Os01g56420	3808.61	6251.92	1365.29	-2.19501	0	0	down
LOC_Os01g59150	6722.67	10224.2	3221.16	-1.66664	0	0	down
LOC_Os01g59570	3045.74	5191.81	899.677	-2.52824	0	0	down
LOC_Os01g62290	2153.37	561.569	3745.17	2.73729	0	0	up
LOC_Os01g64520	5177.02	2030.46	8323.58	2.03559	0	0	up
LOC_Os01g66120	8846.08	5398.51	12293.7	1.18733	0	0	up
LOC_Os01g67360	2855.41	1354.5	4356.32	1.68531	0	0	up
LOC_Os01g68730	4477.55	6771.14	2183.95	-1.63282	0	0	down
LOC_Os01g68740	3945.98	6702.63	1189.33	-2.49407	0	0	down
LOC_Os01g72140	6352.93	9458.45	3247.41	-1.54204	0	0	down
LOC_Os01g72910	946.834	70.3002	1823.37	4.70967	0	0	up
LOC_Os01g74110	5938.22	9100.59	2775.86	-1.71369	0	0	down
LOC_Os01g74300	13637.4	20416.6	6858.1	-1.57388	0	0	down
LOC_Os02g09810	1780.21	376.768	3183.66	3.08143	0	0	up
LOC_Os02g15560	1542.67	161.627	2923.71	4.17728	0	0	up
LOC_Os02g17500	3935.15	1864.17	6006.14	1.68809	0	0	up
LOC_Os02g18410	1836.01	3158.25	513.774	-2.6225	0	0	down
LOC_Os02g30810	9131.4	13429.1	4833.66	-1.47449	0	0	down
LOC_Os02g31030	1356.29	2380.58	331.996	-2.84377	0	0	down
LOC_Os02g32814	7571.01	11044.4	4097.58	-1.43011	0	0	down
LOC_Os02g36530	2833.47	1372.11	4294.83	1.64617	0	0	up
LOC_Os02g38230	6228.15	2324.36	10131.9	2.12413	0	0	up
LOC_Os02g43540	2244.8	566.541	3923.05	2.78869	0	0	up
LOC_Os02g44310	9394.89	14817.4	3972.43	-1.89943	0	0	down
LOC_Os02g46030	2047.03	873.792	3220.27	1.88192	0	0	up
LOC_Os02g46460	1821.37	658.767	2983.98	2.17958	0	0	up
LOC_Os02g50000	2529.84	1191.84	3867.85	1.69855	0	0	up
LOC_Os02g51110	30009.1	41378.5	18639.8	-1.15054	0	0	down
LOC_Os02g57720	38500.8	16191.4	60810.2	1.90886	0	0	up
LOC_Os03g03034	1523.64	184.393	2862.88	3.95397	0	0	up
LOC_Os03g03810	1648.41	293.209	3003.62	3.3571	0	0	up
LOC_Os03g05750	1110.5	236.441	1984.56	3.07144	0	0	up
LOC_Os03g10090	3101.37	145.29	6057.46	5.38729	0	0	up
LOC_Os03g10640	3962.76	6586.63	1338.89	-2.2995	0	0	down
LOC_Os03g11734	9391.49	4714.56	14068.4	1.57666	0	0	up
LOC_Os03g11900	2623.13	1116.59	4129.66	1.88535	0	0	up
LOC_Os03g12510	1627.23	157.402	3097.05	4.29177	0	0	up
LOC_Os03g13210	2479.43	786.32	4172.54	2.40605	0	0	up
LOC_Os03g15960	946.686	197.683	1695.69	3.09869	0	0	up
LOC_Os03g17790	1349.04	464.169	2233.92	2.26739	0	0	up
LOC_Os03g18130	3279.08	853.503	5704.65	2.73818	0	0	up
LOC_Os03g18770	3945.79	6395.58	1496	-2.09553	0	0	down
LOC_Os03g19420	41001.2	57431.3	24571	-1.22493	0	0	down
LOC_Os03g20120	1174.16	164.835	2183.49	3.72841	0	0	up
LOC_Os03g20370	8024.01	11625.3	4422.7	-1.39421	0	0	down
LOC_Os03g20420	7281.25	11160.5	3401.99	-1.71427	0	0	down
LOC_Os03g25330	6763.42	9875.19	3651.65	-1.43559	0	0	down
LOC_Os03g31750	4354.26	601.108	8107.42	3.75244	0	0	up
LOC_Os03g49260	2413.09	4048.17	778.014	-2.38072	0	0	down
LOC_Os03g50130	4892.44	7306.03	2478.86	-1.55956	0	0	down
LOC_Os03g60080	1917.27	282.629	3551.91	3.65058	0	0	up
LOC_Os04g08350	3591.2	1756.75	5425.65	1.62602	0	0	up
LOC_Os04g16450	3355.69	5229.06	1482.32	-1.81924	0	0	down
LOC_Os04g27070	2132.32	3287.57	977.071	-1.75087	0	0	down
LOC_Os04g33150	1068.09	269.295	1866.88	2.79322	0	0	up
LOC_Os04g36740	2421.43	3882.65	960.22	-2.01472	0	0	down
LOC_Os04g37770	2416.1	3850.7	981.508	-1.97277	0	0	down
LOC_Os04g39980	1027.44	255.268	1799.62	2.81889	0	0	up
LOC_Os04g44060	10050.8	4632.18	15469.5	1.73955	0	0	up
LOC_Os04g46810	1580.12	2689.24	471.004	-2.51634	0	0	down
LOC_Os04g47360	1143.85	2009.9	277.802	-2.8553	0	0	down
LOC_Os04g50970	8484.48	14312.9	2656.05	-2.43011	0	0	down
LOC_Os04g56430	8280.31	526.486	16034.1	4.92871	0	0	up
LOC_Os05g04440	4367.84	7029.44	1706.23	-2.04331	0	0	down
LOC_Os05g04584	3169.64	1608.02	4731.26	1.5563	0	0	up
LOC_Os05g13940	8183.06	2828.35	13537.8	2.25962	0	0	up
LOC_Os05g15770	4947.55	662.588	9232.51	3.80098	0	0	up
LOC_Os05g38040	1341.01	378.985	2303.04	2.60395	0	0	up
LOC_Os05g39540	1283.68	2444.07	123.286	-4.3151	0	0	down
LOC_Os05g39720	1130.63	302.66	1958.59	2.69441	0	0	up
LOC_Os05g41990	5426.57	8724.2	2128.93	-2.03552	0	0	down
LOC_Os05g50750	8864.69	4489.57	13239.8	1.55971	0	0	up
LOC_Os06g01760	8681.65	3508.69	13854.6	1.98128	0	0	up
LOC_Os06g05930	5140.95	7631.58	2650.32	-1.52616	0	0	down
LOC_Os06g06290	6734.54	9603.58	3865.5	-1.31322	0	0	down
LOC_Os06g07040	2216.2	334.759	4097.65	3.6122	0	0	up
LOC_Os06g07250	13743.9	20674.8	6813.01	-1.60161	0	0	down
LOC_Os06g13720	937.588	43.2848	1831.89	5.39699	0	0	up
LOC_Os06g29730	1244.36	63.6095	2425.11	5.25447	0	0	up
LOC_Os06g39110	1695.55	363.941	3027.15	3.05637	0	0	up
LOC_Os06g39120	3582.55	652.045	6513.06	3.32039	0	0	up
LOC_Os06g48810	1798.09	3459.1	137.07	-4.65619	0	0	down
LOC_Os06g51060	1632.89	355.954	2909.83	3.03627	0	0	up
LOC_Os07g01410	22988.8	37471.2	8506.42	-2.13926	0	0	down
LOC_Os07g05940	1380.17	49.6267	2710.72	5.77265	0	0	up
LOC_Os07g10840	1800.36	641.882	2958.84	2.20505	0	0	up
LOC_Os07g26630	3974.61	1906.32	6042.9	1.66465	0	0	up
LOC_Os07g35560	3572.1	1197.18	5947.02	2.31294	0	0	up
LOC_Os08g03290	23046.1	15201.5	30890.6	1.02294	0	0	up
LOC_Os08g06110	8550.88	3422.63	13679.1	1.99814	0	0	up
LOC_Os08g09010	817.35	73.3669	1561.33	4.40556	0	0	up
LOC_Os08g09060	1193.73	100.059	2287.4	4.51286	0	0	up
LOC_Os08g10500	2140.67	705.857	3575.48	2.34255	0	0	up
LOC_Os08g39140	8219.26	4723.17	11715.4	1.31016	0	0	up
LOC_Os09g07460	7580.84	10524.9	4636.77	-1.18267	0	0	down
LOC_Os09g10010	835.595	102.587	1568.6	3.93419	0	0	up
LOC_Os09g19970	796.9	135.602	1458.2	3.42769	0	0	up
LOC_Os09g21180	2079.94	267.511	3892.38	3.85992	0	0	up
LOC_Os09g24370	100542	156842	44241.6	-1.82589	0	0	down
LOC_Os09g27500	3824.82	5659.83	1989.81	-1.50825	0	0	down
LOC_Os09g27510	888.253	1663.6	112.903	-3.88187	0	0	down
LOC_Os09g28050	13818.9	19373	8264.8	-1.2288	0	0	down
LOC_Os09g39070	5006.36	7532.15	2480.56	-1.60279	0	0	down
LOC_Os09g39090	4047.91	5965.62	2130.21	-1.48611	0	0	down
LOC_Os10g02040	1054.55	1864.17	244.935	-2.93108	0	0	down
LOC_Os10g02070	6476.15	2662.43	10289.9	1.95076	0	0	up
LOC_Os10g03390	1570.16	2626.1	514.213	-2.35235	0	0	down
LOC_Os10g14920	2358.19	405.555	4310.83	3.40748	0	0	up
LOC_Os10g18870	2556.87	5089.76	23.982	-7.724	0	0	down
LOC_Os10g25130	6104.07	3560.87	8647.27	1.28003	0	0	up
LOC_Os10g31730	4356.07	7265.32	1446.83	-2.32843	0	0	down
LOC_Os10g31780	2257.57	1018.95	3496.2	1.77842	0	0	up
LOC_Os10g35070	836.394	99.0539	1573.73	3.98839	0	0	up
LOC_Os10g38040	3228.06	1376.55	5079.57	1.88154	0	0	up
LOC_Os10g39680	1417.21	139.109	2695.3	4.28379	0	0	up
LOC_Os10g40430	3088.78	5010.86	1166.69	-2.10362	0	0	down
LOC_Os10g40530	4603.23	6776.98	2429.47	-1.4805	0	0	down
LOC_Os10g41980	2994.42	910.33	5078.52	2.47958	0	0	up
LOC_Os10g41999	1553.99	199.905	2908.08	3.86437	0	0	up
LOC_Os10g42610	1481.89	510.873	2452.9	2.26408	0	0	up
LOC_Os10g42960	5168.79	7614.15	2723.43	-1.48378	0	0	down
LOC_Os11g03300	1619.72	611.656	2627.79	2.10393	0	0	up
LOC_Os11g04020	12148.6	18350.7	5946.59	-1.62569	0	0	down
LOC_Os11g24140	19181.4	3770.48	34592.3	3.19724	0	0	up
LOC_Os11g40590	2322.77	3703.92	941.615	-1.97702	0	0	down
LOC_Os11g46860	1509	2537.82	480.185	-2.40118	0	0	down
LOC_Os12g03040	1313.26	336.194	2290.33	2.76786	0	0	up
LOC_Os12g16010	1398.96	2541.63	256.286	-3.31173	0	0	down
LOC_Os12g29400	908.808	183.226	1634.39	3.15362	0	0	up
LOC_Os12g36840	5078.01	7697.19	2458.84	-1.64633	0	0	down
LOC_Os12g37519	1208.3	63.6711	2352.92	5.21848	0	0	up
LOC_Os12g38051	63631.6	107689	19574.6	-2.45981	0	0	down
LOC_Os12g42860	1711.12	590.032	2832.22	2.26464	0	0	up
novel.166	861.868	118.249	1605.49	3.76353	0	0	up
LOC_Os10g40520	1351.43	2267.18	435.684	-2.38137	5.96797e-308	9.17144e-306	down
LOC_Os03g02040	2197.5	3381.09	1013.91	-1.73767	8.1276e-307	1.24087e-304	down
LOC_Os07g05620	6305.41	8827.64	3783.18	-1.22224	2.04579e-305	3.10309e-303	down
LOC_Os05g49840	1021.76	1768.65	274.87	-2.68679	6.71367e-302	1.01177e-299	down
LOC_Os01g70850	924.334	1645.64	203.03	-3.02139	1.6504e-301	2.47127e-299	down
LOC_Os03g05910	2485.17	1215.58	3754.77	1.62763	8.5253e-301	1.26842e-298	up
LOC_Os05g38530	800.115	48.2658	1551.96	5.00807	4.19013e-298	6.19477e-296	up
LOC_Os08g08980	2330.35	3589.8	1070.9	-1.74558	3.04615e-297	4.47515e-295	down
LOC_Os03g52370	1405.87	536.704	2275.03	2.08425	6.89211e-296	1.0062e-293	up
LOC_Os05g47700	21766.2	12379.8	31152.7	1.33126	6.16983e-295	8.95163e-293	up
LOC_Os01g68720	4467.29	6824.75	2109.83	-1.6933	2.76758e-293	3.99062e-291	down
LOC_Os03g53020	821.182	178.426	1463.94	3.03315	5.1849e-293	7.43031e-291	up
LOC_Os07g23640	5616.95	10.4741	11223.4	10.1035	9.32672e-293	1.32843e-290	up
LOC_Os01g58890	6751.69	3773.69	9729.7	1.36653	4.08159e-291	5.7783e-289	up
LOC_Os01g63580	2697.32	1380.07	4014.57	1.54051	1.3009e-289	1.83058e-287	up
LOC_Os10g32700	1988.43	3076.02	900.84	-1.77102	1.39207e-289	1.94714e-287	down
LOC_Os06g07300	746.835	1455.08	38.5874	-5.23195	1.79765e-289	2.49949e-287	down
LOC_Os03g27019	1057.25	318.255	1796.25	2.49387	4.77685e-289	6.60251e-287	up
novel.222	720.846	110.49	1331.2	3.588	1.74989e-287	2.40446e-285	up
LOC_Os09g31482	1539.56	641.77	2437.34	1.92563	3.71581e-286	5.07588e-284	up
LOC_Os07g48780	5149.91	7310.41	2989.41	-1.28982	8.52007e-286	1.1571e-283	down
LOC_Os04g33920	1952.48	14.8501	3890.11	8.05716	1.67663e-284	2.26384e-282	up
LOC_Os10g18340	2007.89	3103.73	912.053	-1.76718	9.13469e-284	1.22631e-281	down
LOC_Os09g23140	1040.91	1765.52	316.298	-2.47924	2.851e-283	3.80551e-281	down
LOC_Os02g01220	1879.85	2988.56	771.132	-1.95543	1.46352e-282	1.9424e-280	down
LOC_Os07g48830	685.896	65.8189	1305.97	4.31578	1.73919e-282	2.29525e-280	up
LOC_Os03g62790	3035.66	1638.76	4432.56	1.43503	5.39475e-282	7.07955e-280	up
LOC_Os02g08440	1122.88	373.655	1872.11	2.32493	6.79912e-282	8.87266e-280	up
LOC_Os04g31120	1739.28	766.188	2712.37	1.82293	6.3268e-281	8.21043e-279	up
LOC_Os01g19020	10157	14452	5862.03	-1.30221	1.85822e-277	2.39813e-275	down
LOC_Os11g05190	1010.48	297.617	1723.33	2.53238	5.20526e-275	6.68075e-273	up
LOC_Os08g44850	1597.63	2549.12	646.134	-1.98152	5.70461e-275	7.28163e-273	down
LOC_Os08g37250	4473.06	6365.45	2580.67	-1.30265	3.08033e-273	3.91051e-271	down
LOC_Os06g33710	1851.29	825.149	2877.43	1.80365	9.47673e-273	1.19658e-270	up
LOC_Os03g53150	4651.83	6548.34	2755.31	-1.24879	1.16224e-272	1.45961e-270	down
LOC_Os07g02460	734.717	131.82	1337.61	3.34126	1.24735e-272	1.55813e-270	up
LOC_Os02g48900	2868.55	4194.82	1542.28	-1.44381	4.4759e-272	5.5613e-270	down
LOC_Os03g50160	698.061	123.909	1272.21	3.36577	5.93433e-272	7.3344e-270	up
LOC_Os05g04470	2081.33	3195.51	967.157	-1.72557	1.49077e-271	1.83278e-269	down
LOC_Os07g26660	812.232	186.184	1438.28	2.95127	5.47443e-270	6.69514e-268	up
LOC_Os03g25280	1151.75	1883.36	420.15	-2.16303	1.00336e-269	1.2207e-267	down
LOC_Os02g09930	5452.14	7551.5	3352.79	-1.17162	1.049e-269	1.26962e-267	down
LOC_Os12g08260	1009.82	316.099	1703.55	2.43265	3.55009e-269	4.27457e-267	up
LOC_Os05g33940	2247.12	3454.92	1039.33	-1.73464	3.48489e-268	4.17454e-266	down
LOC_Os03g46060	669.786	115.783	1223.79	3.40185	1.00763e-265	1.20088e-263	up
LOC_Os06g51260	1133.1	386.627	1879.58	2.28129	1.67256e-264	1.98321e-262	up
LOC_Os06g40440	1069.47	328.658	1810.28	2.46476	2.91549e-264	3.43954e-262	up
LOC_Os03g22120	878.418	240.124	1516.71	2.66087	1.52229e-263	1.78689e-261	up
LOC_Os02g15550	4490.85	2569.07	6412.62	1.31948	3.82384e-263	4.44384e-261	up
LOC_Os07g09420	1068.19	309.44	1826.94	2.56118	1.55137e-260	1.79398e-258	up
LOC_Os04g50700	1012.56	1695.73	329.387	-2.36309	1.70759e-259	1.9649e-257	down
LOC_Os01g18170	16538.3	22697.7	10378.9	-1.12901	8.36955e-259	9.5368e-257	down
LOC_Os07g07790	2317.6	3518.14	1117.07	-1.65635	1.41354e-258	1.60286e-256	down
LOC_Os06g45710	3493.79	2027.59	4959.99	1.28985	1.17086e-255	1.32126e-253	up
LOC_Os12g25090	705.27	135.691	1274.85	3.22787	5.19939e-255	5.83906e-253	up
LOC_Os11g02100	769.22	183.639	1354.8	2.87841	1.69427e-253	1.89361e-251	up
LOC_Os03g21040	15429.9	8968.64	21891.2	1.28721	7.93986e-253	8.83177e-251	up
LOC_Os11g35350	2157.86	3278.48	1037.23	-1.66183	9.43032e-252	1.04399e-249	down
LOC_Os05g42360	741.083	1289.99	192.177	-2.7465	1.27595e-251	1.40589e-249	down
LOC_Os04g55740	926.071	272.379	1579.76	2.53641	5.93178e-251	6.50518e-249	up
LOC_Os01g61080	810.946	219.969	1401.92	2.66817	3.62784e-250	3.95994e-248	up
LOC_Os06g30860	634.795	75.2903	1194.3	3.97483	1.16498e-249	1.26571e-247	up
LOC_Os04g35520	3054.55	1672.19	4436.91	1.40856	5.07588e-249	5.48923e-247	up
LOC_Os02g37380	608.058	49.5144	1166.6	4.55594	6.79184e-249	7.31109e-247	up
LOC_Os11g33270	1001.9	1650.84	352.955	-2.22603	6.85766e-249	7.34807e-247	down
LOC_Os04g58710	6419.96	8648.58	4191.34	-1.04515	8.88528e-247	9.47723e-245	down
LOC_Os01g21250	876.312	228.529	1524.1	2.73226	3.5533e-246	3.7728e-244	up
LOC_Os02g32950	660.973	139.454	1182.49	3.08304	9.61944e-246	1.01674e-243	up
LOC_Os01g18080	4827.64	1151.38	8503.9	2.88412	1.45918e-245	1.53536e-243	up
LOC_Os01g09220	595.008	50.5195	1139.5	4.49268	3.71225e-245	3.88854e-243	up
LOC_Os09g16090	1658.85	2611.78	705.925	-1.88758	4.08051e-245	4.25521e-243	down
LOC_Os11g03730	5555.24	7641.71	3468.78	-1.13988	1.49621e-244	1.55333e-242	down
LOC_Os02g48870	3007.76	4393.51	1622.01	-1.43856	3.49946e-244	3.61698e-242	down
LOC_Os07g44410	2264.53	1084.2	3444.87	1.66789	3.98882e-244	4.10462e-242	up
LOC_Os02g13100	4358.71	6077.52	2639.9	-1.20289	6.5663e-244	6.72729e-242	down
LOC_Os10g38740	846.674	239.313	1454.03	2.60375	3.20124e-240	3.26541e-238	up
LOC_Os08g24200	1511.42	673.598	2349.24	1.8034	5.25452e-240	5.33654e-238	up
LOC_Os11g05380	594.256	39.7762	1148.74	4.8537	5.77806e-240	5.84285e-238	up
LOC_Os06g12310	1352.5	2129.51	575.498	-1.88915	6.72761e-240	6.77372e-238	down
LOC_Os05g01570	920.13	1537.95	302.313	-2.34905	5.12105e-239	5.13402e-237	down
LOC_Os03g12890	701.74	149.686	1253.79	3.06598	8.41223e-239	8.39749e-237	up
LOC_Os04g46940	3154.93	4508.39	1801.47	-1.32322	1.31524e-238	1.30734e-236	down
LOC_Os03g01300	7616.1	4853.86	10378.3	1.09656	1.47304e-237	1.45799e-235	up
LOC_Os10g31660	16234.1	27704.2	4763.97	-2.53998	6.35367e-237	6.23594e-235	down
LOC_Os06g35060	975.338	1596.63	354.042	-2.17284	1.67385e-235	1.63597e-233	down
LOC_Os10g13700	785.784	213.983	1357.58	2.66063	7.76024e-235	7.55298e-233	up
LOC_Os03g58890	687.057	170.971	1203.14	2.81791	8.38623e-235	8.12838e-233	up
LOC_Os02g33710	4839.94	2973.27	6706.61	1.17393	1.00851e-233	9.73465e-232	up
LOC_Os01g03630	651.459	1277.16	25.7548	-5.63531	1.07292e-233	1.03137e-231	down
novel.133	2001.92	999.136	3004.71	1.58917	4.84031e-233	4.6338e-231	up
LOC_Os01g64730	2003.33	1026.39	2980.28	1.5373	7.60491e-233	7.22126e-231	up
LOC_Os11g44680	3308.28	4774.13	1842.43	-1.37404	1.68132e-231	1.59004e-229	down
LOC_Os01g37000	10334.3	14575.9	6092.62	-1.25848	6.52161e-231	6.14267e-229	down
LOC_Os04g17100	4170.59	2471.46	5869.73	1.24695	4.25879e-230	3.99522e-228	up
LOC_Os08g31630	1139.65	456.209	1823.1	1.99976	5.47066e-230	5.11157e-228	up
novel.473	718.893	173.325	1264.46	2.86728	7.03155e-230	6.54382e-228	up
LOC_Os01g63540	2107.22	1096.42	3118.02	1.50813	1.13476e-229	1.05186e-227	up
LOC_Os03g46070	573.623	85.6019	1061.64	3.62763	1.3925e-229	1.28567e-227	up
LOC_Os02g03870	1374.34	2193.01	555.681	-1.98163	4.88018e-229	4.48804e-227	down
LOC_Os08g02110	2227.39	1096.49	3358.29	1.6139	5.25039e-229	4.80956e-227	up
LOC_Os07g28890	1649.12	2500.8	797.437	-1.64813	1.21807e-227	1.10283e-225	down
LOC_Os01g50080	1363.94	583.161	2144.72	1.87819	1.85407e-227	1.67217e-225	up
LOC_Os07g41410	1958.62	839.833	3077.41	1.87643	4.63269e-227	4.16212e-225	up
LOC_Os03g05140	982.38	1633.92	330.837	-2.30596	9.93688e-227	8.89332e-225	down
novel.872	1588.8	2443.32	734.281	-1.73572	2.65722e-226	2.36909e-224	down
LOC_Os03g19427	25517.4	35933.7	15101.1	-1.25081	3.82555e-226	3.39776e-224	down
LOC_Os02g02190	559.952	81.5806	1038.32	3.67585	1.00117e-225	8.85844e-224	up
LOC_Os12g08130	865.406	282.748	1448.06	2.35455	2.97967e-225	2.62649e-223	up
LOC_Os04g46630	623.103	131.603	1114.6	3.07468	4.11618e-225	3.61466e-223	up
LOC_Os01g15340	1809.86	338.987	3280.74	3.27765	4.57925e-225	4.00624e-223	up
LOC_Os07g48030	2070.49	3097.21	1043.78	-1.57017	5.53323e-225	4.82278e-223	down
LOC_Os01g64840	769.706	1304.05	235.364	-2.46986	1.07364e-224	9.32313e-223	down
LOC_Os02g40730	3387	1923.78	4850.21	1.33432	8.95203e-224	7.74484e-222	up
LOC_Os12g05440	566.632	37.7418	1095.52	4.84833	4.98316e-222	4.29526e-220	up
LOC_Os03g04190	1033.47	1657.83	409.105	-2.01899	1.95905e-220	1.68241e-218	down
LOC_Os02g52990	797.555	249.45	1345.66	2.43203	2.12859e-220	1.82131e-218	up
LOC_Os03g17760	1100.1	1760.75	439.448	-2.00239	5.02402e-220	4.28307e-218	down
novel.23	841.39	1403.43	279.354	-2.3309	8.32618e-220	7.07241e-218	down
LOC_Os12g41690	1336.75	610.465	2063.03	1.75648	5.10201e-218	4.31804e-216	up
LOC_Os11g24510	1738.8	881.082	2596.52	1.55991	3.91027e-215	3.29747e-213	up
LOC_Os07g07860	1747.81	2626.53	869.084	-1.59591	2.09749e-214	1.76242e-212	down
LOC_Os01g24560	976.241	1575.79	376.692	-2.06478	7.68127e-214	6.43107e-212	down
LOC_Os01g04620	519.567	40.3999	998.734	4.63786	8.23473e-214	6.86983e-212	up
LOC_Os02g04640	1203.32	516.63	1890.02	1.87107	9.33111e-214	7.75678e-212	up
LOC_Os02g07410	5432.38	7353.56	3511.2	-1.06607	4.44842e-213	3.68477e-211	down
LOC_Os09g39940	1069.14	418.07	1720.21	2.03883	5.92218e-212	4.8882e-210	up
LOC_Os03g52390	569.168	124.135	1014.2	3.03514	2.09845e-211	1.72598e-209	up
LOC_Os11g19864	505.518	61.7993	949.237	3.94075	1.28497e-210	1.05318e-208	up
LOC_Os09g30458	555.445	100.858	1010.03	3.3208	2.84977e-209	2.32755e-207	up
LOC_Os03g09980	1619.9	2493.93	745.872	-1.74044	5.00509e-209	4.07365e-207	down
LOC_Os06g36560	3123.62	4420.92	1826.31	-1.27586	5.73769e-209	4.6537e-207	down
LOC_Os01g15900	1396.79	662.249	2131.33	1.68804	1.0693e-208	8.61299e-207	up
LOC_Os06g34840	2099.3	1032.83	3165.77	1.61574	3.0475e-207	2.44627e-205	up
LOC_Os04g41810	1213.65	1913.02	514.268	-1.89479	3.10157e-206	2.48115e-204	down
LOC_Os01g72009	7733.49	4889.27	10577.7	1.11296	7.0993e-206	5.65981e-204	up
LOC_Os01g42520	2460.47	3605.11	1315.83	-1.45447	2.29845e-205	1.82618e-203	down
LOC_Os08g27720	1580.71	784.794	2376.63	1.59896	3.79663e-205	3.00629e-203	up
LOC_Os06g30030	930.446	1512.62	348.277	-2.11667	1.20246e-204	9.48929e-203	down
LOC_Os01g58910	3471.11	2141.88	4800.33	1.16495	1.40583e-203	1.10569e-201	up
LOC_Os10g18760	938.49	1864.27	12.7114	-7.1986	4.38528e-203	3.43745e-201	down
LOC_Os12g15920	991.171	1608.61	373.736	-2.10597	6.0809e-203	4.75063e-201	down
LOC_Os10g28350	750.93	226.146	1275.71	2.50033	1.04815e-202	8.16123e-201	up
LOC_Os12g36910	1191.35	525.931	1856.77	1.81941	2.87331e-202	2.22982e-200	up
LOC_Os09g21230	3172.74	1935.89	4409.58	1.18688	5.3681e-202	4.1521e-200	up
LOC_Os05g31750	677.179	1152.8	201.555	-2.51757	1.47736e-201	1.13893e-199	down
LOC_Os03g24560	756.149	241.581	1270.72	2.39154	1.97256e-201	1.51569e-199	up
LOC_Os11g31090	4296.31	5992.35	2600.26	-1.20483	3.72959e-201	2.85638e-199	down
LOC_Os03g25790	1374.2	649.834	2098.57	1.69192	5.30755e-201	4.0516e-199	up
LOC_Os03g25320	1000.13	1599.27	400.991	-1.99613	9.09598e-201	6.92094e-199	down
LOC_Os04g57870	5173.03	7275.87	3070.2	-1.2443	1.16933e-200	8.86827e-199	down
LOC_Os05g24780	696.749	1179.95	213.547	-2.46571	2.09103e-200	1.58072e-198	down
LOC_Os09g28210	612.512	153.113	1071.91	2.80455	9.24114e-200	6.96335e-198	up
LOC_Os02g14160	1014.72	1616.35	413.094	-1.969	9.65315e-199	7.25042e-197	down
LOC_Os04g42950	601.168	152.269	1050.07	2.78881	4.25745e-198	3.18749e-196	up
LOC_Os07g22930	634.115	163.813	1104.42	2.7497	1.30997e-197	9.77623e-196	up
LOC_Os02g48360	2892.16	4035.46	1748.86	-1.20598	2.26836e-197	1.68747e-195	down
LOC_Os07g43670	2393.59	3453.89	1333.29	-1.37416	2.5952e-197	1.92448e-195	down
LOC_Os03g61150	729.958	235.388	1224.53	2.37649	9.03777e-197	6.6808e-195	up
LOC_Os05g37730	985.719	1561.71	409.725	-1.93154	9.08567e-197	6.69502e-195	down
LOC_Os05g48890	1797.76	2741.26	854.263	-1.68343	2.32798e-196	1.71004e-194	down
novel.14	2780.09	1470.01	4090.17	1.47808	3.6775e-196	2.69288e-194	up
LOC_Os09g26880	3503.03	2186.8	4819.25	1.13963	1.53515e-195	1.12061e-193	up
LOC_Os03g29410	521.438	111.07	931.806	3.06853	2.20093e-195	1.60161e-193	up
LOC_Os12g41980	694.078	1372.27	15.8891	-6.42879	2.48826e-195	1.80507e-193	down
LOC_Os10g38090	2459.18	1295.77	3622.58	1.48343	3.69407e-195	2.67151e-193	up
LOC_Os06g14630	1786.88	927.941	2645.83	1.51266	3.97953e-195	2.86907e-193	up
LOC_Os05g31670	541.932	25.5311	1058.33	5.37736	5.81607e-194	4.18023e-192	up
LOC_Os11g06010	2312.09	1284.78	3339.39	1.37775	1.17741e-193	8.43652e-192	up
LOC_Os09g21370	952.334	365.191	1539.48	2.07444	1.68678e-193	1.20494e-191	up
LOC_Os08g33750	2555.04	1512.97	3597.1	1.2505	6.02234e-193	4.2889e-191	up
LOC_Os01g65830	665.868	192.827	1138.91	2.55943	2.56536e-192	1.82141e-190	up
LOC_Os05g37190	782.202	273.053	1291.35	2.24207	2.71227e-192	1.91987e-190	up
LOC_Os04g47810	1894.68	1010.7	2778.65	1.45871	9.04626e-192	6.38403e-190	up
LOC_Os05g39560	650.082	1120.51	179.652	-2.63856	2.2077e-191	1.55331e-189	down
LOC_Os09g34960	1742.94	2596.25	889.63	-1.54456	8.83564e-191	6.19795e-189	down
LOC_Os02g02170	452.901	49.396	856.407	4.11035	1.61953e-190	1.13265e-188	up
LOC_Os10g34930	442.391	45.5509	839.231	4.19487	3.85479e-190	2.68788e-188	up
LOC_Os02g19820	1385.95	2159.54	612.369	-1.81929	2.76391e-189	1.9215e-187	down
LOC_Os11g07770	1384.52	2104.29	664.745	-1.6621	2.78733e-188	1.92631e-186	down
LOC_Os05g27780	2714.3	1578.23	3850.37	1.28747	1.2648e-187	8.68956e-186	up
novel.1020	446.818	33.9652	859.67	4.64838	5.78665e-187	3.96394e-185	up
LOC_Os03g60509	1946.07	2802.77	1089.37	-1.36406	7.05535e-187	4.81888e-185	down
LOC_Os03g60580	659.985	16.5356	1303.43	6.32012	1.11338e-186	7.5603e-185	up
LOC_Os10g18820	997.671	1984.94	10.4025	-7.57472	1.43064e-186	9.68646e-185	down
LOC_Os12g38290	2789.8	4137.96	1441.63	-1.522	3.40846e-186	2.3011e-184	down
LOC_Os01g61070	570.878	121.57	1020.19	3.06934	5.35428e-186	3.60434e-184	up
LOC_Os07g46990	2600.06	1519.6	3680.51	1.27525	1.24188e-185	8.33595e-184	up
LOC_Os10g40710	5175.23	6996.98	3353.49	-1.06116	3.80991e-185	2.55002e-183	down
LOC_Os08g38300	2825.01	4008.23	1641.79	-1.28845	1.60892e-184	1.07379e-182	down
LOC_Os05g35830	955.138	1508.1	402.181	-1.90548	3.31442e-184	2.20574e-182	down
LOC_Os03g03724	1349.69	2474.38	225.007	-3.45788	4.01937e-184	2.66729e-182	down
LOC_Os08g06380	5663.41	7725.06	3601.76	-1.10163	8.98686e-184	5.94686e-182	down
LOC_Os03g07570	1487.89	2294.07	681.709	-1.74815	3.72431e-183	2.45059e-181	down
LOC_Os03g02874	502.531	111.445	893.616	3.00383	4.20939e-183	2.762e-181	up
LOC_Os06g51084	3159.46	1973.48	4345.43	1.13818	5.02423e-183	3.28742e-181	up
LOC_Os01g22900	1744.5	930.291	2558.7	1.45988	8.17626e-183	5.3349e-181	up
LOC_Os10g42780	457.384	888.775	25.9935	-5.09298	9.59415e-183	6.24261e-181	down
LOC_Os01g58320	848.624	334.522	1362.73	2.02504	1.03616e-182	6.72321e-181	up
LOC_Os09g25770	1221.7	587.198	1856.2	1.66184	2.3825e-182	1.54163e-180	up
LOC_Os12g36880	1503.65	774.721	2232.57	1.52669	3.58136e-182	2.31097e-180	up
LOC_Os12g38760	885.218	1402.42	368.015	-1.92982	4.89643e-182	3.15085e-180	down
LOC_Os01g32670	477.826	83.9358	871.716	3.36756	7.74222e-182	4.95481e-180	up
LOC_Os10g08780	2147.87	3068.77	1226.97	-1.32334	9.68526e-182	6.18137e-180	down
LOC_Os03g60560	749.976	13.5709	1486.38	6.77436	1.94987e-181	1.24106e-179	up
LOC_Os01g12100	2713.08	1614.77	3811.39	1.2383	4.58551e-181	2.91068e-179	up
LOC_Os01g15830	9551.46	12883.3	6219.66	-1.05085	4.7705e-181	3.01989e-179	down
LOC_Os01g40560	570.022	982.584	157.46	-2.64177	5.19056e-181	3.27693e-179	down
LOC_Os01g53800	4352.45	5830.24	2874.67	-1.02065	1.35721e-180	8.54529e-179	down
LOC_Os04g37990	3415.94	4800.85	2031.03	-1.24138	1.44313e-180	9.06183e-179	down
LOC_Os11g10480	1550.79	772.211	2329.37	1.59301	4.01843e-180	2.51653e-178	up
LOC_Os03g58110	2540.43	3636.18	1444.68	-1.3332	1.62472e-179	1.01475e-177	down
LOC_Os10g30790	3557.58	2186.14	4929.01	1.1722	4.04025e-179	2.5167e-177	up
LOC_Os05g46480	765.357	12.7783	1517.94	6.87848	5.27349e-179	3.27616e-177	up
LOC_Os10g26500	728.301	1199.2	257.4	-2.21854	4.63647e-178	2.87277e-176	down
LOC_Os06g06250	1304.78	1967.65	641.906	-1.61543	1.28855e-177	7.96277e-176	down
LOC_Os08g36910	443.667	28.8391	858.495	4.90957	2.90556e-177	1.79079e-175	up
LOC_Os01g07870	1487.15	725.552	2248.74	1.63048	2.99537e-177	1.84129e-175	up
LOC_Os02g41840	452.77	26.2489	879.29	5.07109	6.44956e-177	3.95421e-175	up
LOC_Os05g42190	2620.07	3642.78	1597.35	-1.18998	1.58766e-176	9.70844e-175	down
LOC_Os08g09080	1321.97	211.85	2432.09	3.52514	2.13195e-176	1.30027e-174	up
LOC_Os04g02754	1728.03	944.465	2511.59	1.41239	3.00813e-176	1.82987e-174	up
LOC_Os02g48690	1342.34	2072.67	612.008	-1.76124	2.73498e-174	1.65939e-172	down
LOC_Os04g59260	1990.38	2862.7	1118.06	-1.35781	6.7903e-174	4.10919e-172	down
LOC_Os08g30770	6234.6	8373.59	4095.6	-1.03185	1.30051e-173	7.84977e-172	down
LOC_Os01g71380	673.731	1116.38	231.08	-2.2728	1.84137e-173	1.10857e-171	down
LOC_Os06g03860	3045.08	1900.49	4189.67	1.14011	2.13501e-173	1.28205e-171	up
LOC_Os07g34710	416.838	770.604	63.0728	-3.62193	2.92438e-173	1.75156e-171	down
LOC_Os03g18600	1038.2	1600.92	475.471	-1.75302	3.06582e-173	1.83157e-171	down
LOC_Os05g34830	407.487	35.7186	779.256	4.44891	1.33184e-172	7.91613e-171	up
LOC_Os11g37950	627.683	190.804	1064.56	2.47956	5.45096e-172	3.2317e-170	up
LOC_Os02g54820	2339.54	1403.51	3275.57	1.22331	9.70029e-172	5.73643e-170	up
LOC_Os07g34670	532.917	915.062	150.772	-2.60076	1.21058e-171	7.14089e-170	down
LOC_Os07g40890	948.455	412.943	1483.97	1.84651	2.00588e-170	1.18024e-168	up
LOC_Os04g53930	453.194	98.5671	807.82	3.03175	1.18433e-169	6.95094e-168	up
LOC_Os05g15690	466.704	110.446	822.962	2.89476	3.64749e-169	2.13538e-167	up
LOC_Os10g40510	2675.57	3758.64	1592.5	-1.23916	3.96764e-169	2.317e-167	down
LOC_Os04g33570	672.154	237.347	1106.96	2.22011	7.14486e-169	4.16202e-167	up
LOC_Os12g25690	10862.2	14489.2	7235.17	-1.00228	8.26849e-169	4.80457e-167	down
LOC_Os01g55240	816.43	337.605	1295.25	1.94006	9.39632e-169	5.44637e-167	up
LOC_Os03g37930	507.794	136.178	879.41	2.68804	1.26525e-168	7.31558e-167	up
LOC_Os06g48010	406.616	757.316	55.9155	-3.76399	1.29311e-168	7.45822e-167	down
LOC_Os12g36240	478.195	115.627	840.762	2.86092	8.19997e-168	4.71781e-166	up
LOC_Os06g45570	456.992	100.951	813.034	3.01386	1.01352e-167	5.81688e-166	up
LOC_Os02g44980	2075.17	1126.33	3024.02	1.42289	1.54758e-167	8.86027e-166	up
LOC_Os05g44340	674.54	12.354	1336.73	6.73354	2.13819e-167	1.22117e-165	up
LOC_Os03g12820	990.286	456.661	1523.91	1.73705	3.20816e-166	1.82779e-164	up
LOC_Os08g28670	2945.23	4018.61	1871.85	-1.10233	3.59563e-166	2.04356e-164	down
LOC_Os08g05480	961.579	1487.16	435.993	-1.7695	1.39839e-165	7.92838e-164	down
LOC_Os10g23050	410.027	75.8886	744.166	3.29107	7.58734e-165	4.29135e-163	up
LOC_Os12g38150	989.023	442.995	1535.05	1.79199	1.10756e-164	6.24917e-163	up
LOC_Os12g38010	7009.02	11073.1	2944.96	-1.91043	1.1958e-164	6.73078e-163	down
LOC_Os01g08860	486.353	121.177	851.53	2.80966	2.55009e-163	1.43191e-161	up
LOC_Os02g43010	982.92	452.397	1513.44	1.74093	2.58787e-163	1.44964e-161	up
LOC_Os09g25760	2189.91	1311.79	3068.02	1.22625	5.34463e-163	2.98673e-161	up
LOC_Os03g55590	1064.79	478.862	1650.72	1.7809	2.01844e-162	1.11992e-160	up
LOC_Os05g27730	3327.21	2068.54	4585.87	1.14772	3.07837e-162	1.70397e-160	up
LOC_Os02g48710	919.376	399.425	1439.33	1.84663	1.34691e-161	7.42039e-160	up
LOC_Os08g09040	398.63	67.404	729.855	3.44487	1.35487e-161	7.44668e-160	up
LOC_Os01g71830	591.995	185.322	998.667	2.4314	4.39049e-161	2.40181e-159	up
LOC_Os12g05870	372.981	32.3166	713.646	4.46687	1.94676e-160	1.06249e-158	up
LOC_Os12g38140	2902.9	4016.54	1789.26	-1.16743	9.95386e-160	5.40726e-158	down
LOC_Os03g43750	556.717	14.0575	1099.38	6.30256	1.01287e-159	5.48948e-158	up
LOC_Os06g07560	2475.17	3457.66	1492.67	-1.21251	1.99783e-159	1.08026e-157	down
LOC_Os01g04950	1233.86	1828.46	639.248	-1.51656	5.76742e-159	3.11134e-157	down
LOC_Os02g28830	2210.45	1363.9	3056.99	1.16488	3.2832e-157	1.7671e-155	up
LOC_Os06g50420	1906.78	2855.98	957.587	-1.57506	4.30222e-157	2.31024e-155	down
LOC_Os03g29850	1627.58	2343.94	911.227	-1.36354	7.97155e-157	4.27081e-155	down
LOC_Os05g10690	1795.12	1022.96	2567.29	1.32721	1.60469e-156	8.57755e-155	up
LOC_Os05g35050	384.196	692.357	76.0361	-3.18511	2.42627e-156	1.29396e-154	down
LOC_Os11g16924	376.392	52.7159	700.068	3.74116	5.90599e-156	3.14255e-154	up
LOC_Os01g47070	550.115	175.142	925.088	2.40112	2.91378e-155	1.54689e-153	up
LOC_Os01g01620	2541.81	3563.67	1519.94	-1.22968	3.45876e-155	1.83205e-153	down
LOC_Os01g68770	3030.17	1982.18	4078.17	1.04083	1.18332e-154	6.25366e-153	up
LOC_Os08g32120	1711.37	2471.54	951.207	-1.37839	2.10765e-153	1.10635e-151	down
LOC_Os03g58790	1764.73	1003.41	2526.04	1.3341	1.04665e-152	5.48175e-151	up
LOC_Os11g19840	426.95	97.3915	756.509	2.96837	1.36816e-152	7.14961e-151	up
LOC_Os05g13900	5642.71	3583.4	7702.02	1.10435	2.07889e-152	1.08394e-150	up
LOC_Os06g14370	2601.54	3548.84	1654.24	-1.10082	4.95487e-152	2.57775e-150	down
LOC_Os02g54254	996.886	474.237	1519.54	1.68091	5.0778e-152	2.63583e-150	up
LOC_Os04g49900	1535.47	759.377	2311.56	1.60531	8.47156e-152	4.38774e-150	up
LOC_Os07g43950	515.102	159.785	870.42	2.44898	8.77502e-152	4.53486e-150	up
LOC_Os04g54800	2111.52	2944.57	1278.47	-1.20288	1.2035e-151	6.19218e-150	down
LOC_Os02g14910	556.914	928.383	185.446	-2.32267	4.43761e-151	2.2782e-149	down
LOC_Os03g43930	3620.02	2334.41	4905.63	1.07164	6.33421e-151	3.24476e-149	up
LOC_Os03g53050	2733.16	1749.91	3716.42	1.0873	7.45713e-151	3.81162e-149	up
LOC_Os01g71340	642.324	240.898	1043.75	2.11546	1.34165e-150	6.84271e-149	up
LOC_Os02g52150	417.051	97.6189	736.483	2.90955	1.40252e-150	7.13758e-149	up
LOC_Os01g67030	1302.67	1916.99	688.345	-1.4778	1.78694e-150	9.07417e-149	down
LOC_Os03g16020	661.728	10.724	1312.73	6.96082	4.58294e-150	2.32219e-148	up
LOC_Os03g18070	1472.83	793.967	2151.7	1.43675	5.62159e-150	2.84231e-148	up
LOC_Os02g37610	2367.91	1402.52	3333.31	1.25016	1.44184e-149	7.2743e-148	up
LOC_Os01g65670	1736.65	2470.51	1002.79	-1.30052	4.90129e-149	2.46744e-147	down
LOC_Os11g38050	1288.01	1888.04	687.975	-1.4579	7.3998e-149	3.71724e-147	down
LOC_Os03g10440	741.33	1169.69	312.969	-1.90211	8.32332e-149	4.1722e-147	down
LOC_Os04g54240	354.764	55.7827	653.745	3.53791	4.72481e-148	2.36332e-146	up
LOC_Os05g48810	557.584	180.291	934.877	2.37632	4.81518e-147	2.40337e-145	up
LOC_Os08g28870	512.136	162.5	861.772	2.40984	7.37189e-147	3.66383e-145	up
LOC_Os07g03600	449.19	123.942	774.437	2.64354	9.6213e-147	4.77163e-145	up
LOC_Os09g25090	750.182	321.5	1178.86	1.87378	1.24008e-146	6.13708e-145	up
LOC_Os01g56780	1624.37	916.151	2332.6	1.3492	1.90311e-146	9.39845e-145	up
LOC_Os03g19370	1042.52	1559.85	525.201	-1.57196	2.45301e-146	1.20886e-144	down
LOC_Os02g44990	339.231	39.2522	639.211	4.02022	3.25468e-146	1.60055e-144	up
LOC_Os10g38600	1176.39	1778.86	573.921	-1.63303	3.36806e-146	1.65283e-144	down
LOC_Os11g19850	341.372	28.9588	653.785	4.48548	1.53586e-145	7.5212e-144	up
LOC_Os02g02400	1297.35	704.198	1890.51	1.42556	2.30801e-145	1.12553e-143	up
novel.1035	431.641	15.6745	847.608	5.76191	4.59026e-145	2.23383e-143	up
LOC_Os05g41580	1708.28	2449.39	967.166	-1.33988	1.15264e-144	5.58598e-143	down
LOC_Os01g34880	2099.78	1270.88	2928.67	1.2056	1.33264e-144	6.44496e-143	up
LOC_Os05g51470	1594.67	921.558	2267.78	1.29944	4.12759e-144	1.99207e-142	up
novel.816	360.195	61.0372	659.353	3.43882	4.43542e-144	2.13623e-142	up
LOC_Os02g37260	2188.3	1170.17	3206.43	1.45618	4.74353e-144	2.27992e-142	up
LOC_Os09g38320	854.975	392.23	1317.72	1.75019	6.21541e-144	2.98123e-142	up
LOC_Os03g14050	1836.44	1062.8	2610.07	1.2958	2.94692e-143	1.40771e-141	up
LOC_Os05g08970	665.309	264.206	1066.41	2.01683	7.99971e-143	3.81357e-141	up
LOC_Os12g40890	3009.18	4053.72	1964.64	-1.04554	2.94542e-142	1.39558e-140	down
LOC_Os03g01320	554.257	186.579	921.935	2.30125	8.15488e-142	3.85607e-140	up
LOC_Os12g41970	571.924	1134.29	9.55652	-6.8614	1.02501e-141	4.83701e-140	down
LOC_Os08g38700	2833.49	3872.22	1794.76	-1.10928	1.40476e-140	6.61568e-139	down
LOC_Os02g02320	3420.45	4582.12	2258.79	-1.02012	8.46165e-140	3.96899e-138	down
LOC_Os03g43400	774.535	1201.95	347.12	-1.79044	1.33442e-139	6.24664e-138	down
LOC_Os11g01780	2839.98	3854.84	1825.11	-1.07888	2.01354e-139	9.40684e-138	down
LOC_Os05g12280	1912.43	2658.35	1166.51	-1.18781	7.8703e-139	3.65492e-137	down
LOC_Os03g10320	418.516	114.709	722.322	2.65728	8.08708e-139	3.74814e-137	up
LOC_Os05g16420	717.018	1121.34	312.701	-1.84322	1.09943e-138	5.08545e-137	down
LOC_Os05g29810	393.19	97.9609	688.418	2.8153	1.84758e-138	8.52915e-137	up
LOC_Os10g40934	557.232	195.038	919.427	2.23233	1.8947e-138	8.72944e-137	up
LOC_Os01g58970	1120.52	1643.95	597.101	-1.46182	3.00635e-138	1.38239e-136	down
LOC_Os09g15670	325.92	41.0816	610.759	3.88447	5.57984e-138	2.5607e-136	up
LOC_Os08g38170	5363.44	3517.05	7209.83	1.03495	9.96032e-138	4.56202e-136	up
LOC_Os07g40130	4093.01	5498.23	2687.78	-1.03344	2.09483e-137	9.57595e-136	down
LOC_Os04g30490	1480.5	855.083	2105.92	1.30043	2.37576e-137	1.08389e-135	up
LOC_Os05g49860	3695.58	4947.44	2443.71	-1.01815	2.59348e-137	1.18092e-135	down
LOC_Os01g39770	1249.06	691.359	1806.76	1.38603	4.48778e-137	2.03949e-135	up
LOC_Os04g32620	694.006	299.752	1088.26	1.85879	9.22769e-137	4.18543e-135	up
LOC_Os03g43720	2338.62	1413.99	3263.25	1.20437	1.13875e-136	5.15506e-135	up
LOC_Os10g31460	579.723	191.93	967.516	2.32612	1.46032e-136	6.59798e-135	up
LOC_Os03g10980	387.271	90.32	684.222	2.9262	3.24269e-136	1.46228e-134	up
LOC_Os04g06590	318.313	41.8679	594.758	3.82064	8.58209e-136	3.8626e-134	up
LOC_Os01g62760	2658.28	1665.45	3651.12	1.13113	1.02495e-135	4.60419e-134	up
LOC_Os02g37190	480.32	805.079	155.561	-2.37291	2.49828e-135	1.11795e-133	down
LOC_Os02g45940	1422.49	2052.48	792.507	-1.37352	2.94865e-135	1.31697e-133	down
LOC_Os02g25060	2142.1	2957.32	1326.87	-1.15545	5.20648e-135	2.32096e-133	down
LOC_Os01g68020	1311.4	1909.7	713.09	-1.42158	8.7394e-135	3.88845e-133	down
LOC_Os01g02010	1372.51	772.043	1972.98	1.35251	4.93432e-134	2.18711e-132	up
LOC_Os04g38910	475.621	802.846	148.396	-2.43515	5.14154e-134	2.27465e-132	down
LOC_Os03g45920	2965.06	4071.15	1858.97	-1.13151	5.66794e-134	2.50279e-132	down
LOC_Os08g32980	1088.83	579.232	1598.42	1.4659	6.9804e-133	3.07651e-131	up
LOC_Os05g44940	432.907	734.16	131.654	-2.48231	2.30465e-132	1.01383e-130	down
LOC_Os11g37960	1396.89	777.793	2015.99	1.37316	3.19474e-132	1.40274e-130	up
LOC_Os03g42630	1163.22	571.569	1754.88	1.62188	3.2407e-132	1.42026e-130	up
LOC_Os04g45810	349.103	16.892	681.315	5.32668	5.75158e-132	2.51594e-130	up
LOC_Os03g45390	870.727	424.803	1316.65	1.63416	6.43012e-132	2.80226e-130	up
LOC_Os01g62980	307.135	36.3991	577.872	3.99144	1.6135e-131	7.01856e-130	up
LOC_Os08g14760	2014.7	2763.4	1266	-1.12662	1.80083e-131	7.80436e-130	down
LOC_Os09g27750	318.732	58.3287	579.135	3.30979	1.88824e-131	8.16804e-130	up
LOC_Os10g41550	870.893	413.471	1328.32	1.68108	3.96145e-131	1.71045e-129	up
LOC_Os12g03830	559.911	901.134	218.688	-2.0421	4.40309e-131	1.89763e-129	down
LOC_Os03g13140	299.502	30.6809	568.324	4.21637	6.11821e-131	2.63196e-129	up
LOC_Os10g41560	2662.83	1733	3592.65	1.05286	2.45729e-130	1.05321e-128	up
LOC_Os06g17070	339.053	66.7622	611.344	3.19349	4.1582e-130	1.77571e-128	up
LOC_Os02g32770	1395.47	1992.84	798.096	-1.32014	4.23241e-130	1.8041e-128	down
LOC_Os04g56110	888.649	430.639	1346.66	1.64739	5.37087e-130	2.28521e-128	up
LOC_Os03g60840	382.043	96.4562	667.629	2.79553	8.21252e-130	3.48793e-128	up
LOC_Os12g43510	1988.01	1181.41	2794.6	1.24196	1.32316e-129	5.60939e-128	up
LOC_Os03g36560	1440.39	2056.96	823.824	-1.31942	5.54222e-129	2.34106e-127	down
LOC_Os01g60020	334.973	72.7364	597.21	3.03329	8.87934e-129	3.74391e-127	up
LOC_Os07g45490	1077.57	559.125	1596.01	1.51467	1.228e-128	5.16846e-127	up
LOC_Os10g31330	635.462	63.8168	1207.11	4.2328	6.6215e-128	2.78186e-126	up
LOC_Os06g51050	521.147	190.249	852.046	2.16135	1.00299e-127	4.20624e-126	up
LOC_Os08g44590	905.541	451.991	1359.09	1.58739	1.41475e-127	5.9133e-126	up
novel.698	305.38	48.9898	561.769	3.52077	1.4151e-127	5.9133e-126	up
LOC_Os04g03164	330.959	69.1531	592.765	3.09771	2.76911e-127	1.15506e-125	up
LOC_Os06g03640	2982.46	3986.27	1978.65	-1.01158	2.81291e-127	1.17124e-125	down
LOC_Os03g02530	2554.12	3485.23	1623.02	-1.10378	2.43832e-126	1.00987e-124	down
LOC_Os05g36270	426.263	134.798	717.729	2.40947	8.69412e-126	3.58809e-124	up
LOC_Os03g06330	1330.72	755.482	1905.97	1.33747	9.88169e-126	4.07101e-124	up
LOC_Os01g18584	908.692	459.037	1358.35	1.56496	4.92316e-125	2.02465e-123	up
LOC_Os12g02080	549.831	212.227	887.435	2.06475	1.86054e-124	7.61125e-123	up
LOC_Os06g39240	322.286	18.2834	626.288	5.11991	3.52072e-124	1.43526e-122	up
LOC_Os06g02000	1636.24	2281.89	990.591	-1.20408	3.77753e-124	1.53727e-122	down
LOC_Os01g64640	1984.61	2728.28	1240.94	-1.13575	3.83402e-124	1.55755e-122	down
LOC_Os01g15810	1249.45	1876.42	622.473	-1.59333	7.19082e-124	2.91615e-122	down
LOC_Os01g72900	284.245	27.6284	540.861	4.29598	1.51478e-123	6.12174e-122	up
LOC_Os04g13140	481.858	174.823	788.893	2.17523	1.72102e-123	6.94322e-122	up
LOC_Os03g44810	1963.79	1159.65	2767.94	1.25601	1.8923e-123	7.62106e-122	up
LOC_Os12g01760	2207.76	3006.44	1409.09	-1.09217	2.40991e-123	9.68902e-122	down
LOC_Os04g28870	1137.04	1691.47	582.606	-1.53984	3.32878e-123	1.33603e-121	down
LOC_Os05g05600	424.254	131.563	716.946	2.45059	4.49127e-123	1.79951e-121	up
LOC_Os03g14010	894.618	418.972	1370.26	1.71125	4.81907e-123	1.92755e-121	up
LOC_Os11g03370	309.246	58.0596	560.432	3.27736	8.71835e-123	3.48123e-121	up
LOC_Os01g04280	2675.12	3567.52	1782.71	-1.00101	1.04674e-122	4.17248e-121	down
LOC_Os08g05570	2566.21	1652.62	3479.79	1.07447	2.5775e-122	1.02568e-120	up
LOC_Os05g11320	1020.26	1560.79	479.732	-1.70161	5.10789e-122	2.02573e-120	down
LOC_Os10g22050	1713.83	2411.07	1016.59	-1.24506	5.54821e-122	2.19662e-120	down
LOC_Os06g07600	1684.27	1010.49	2358.05	1.22317	1.64409e-121	6.49819e-120	up
LOC_Os01g14670	2490.37	1601.57	3379.17	1.07558	1.98021e-121	7.81347e-120	up
LOC_Os01g72530	779.928	369.075	1190.78	1.6879	2.10518e-121	8.29256e-120	up
LOC_Os06g46799	2868.75	3867.21	1870.28	-1.04912	3.27376e-121	1.2874e-119	down
LOC_Os06g30370	465.291	160.636	769.946	2.25713	4.89153e-121	1.92036e-119	up
LOC_Os01g71350	599.406	240.249	958.563	1.99634	6.5051e-121	2.54954e-119	up
LOC_Os08g09000	287.691	22.9284	552.454	4.5802	8.30139e-121	3.24811e-119	up
LOC_Os02g04430	1248.25	723.346	1773.15	1.29326	1.25557e-120	4.89631e-119	up
LOC_Os02g53620	1486.36	2102.77	869.945	-1.27332	1.40997e-120	5.48011e-119	down
LOC_Os11g38010	738.171	1122.3	354.04	-1.66513	1.96627e-120	7.62958e-119	down
LOC_Os01g53880	1684.26	2330.5	1038.02	-1.16768	2.51443e-120	9.74041e-119	down
LOC_Os03g04130	1258.54	1784.52	732.566	-1.28513	4.91906e-120	1.90239e-118	down
LOC_Os04g03920	437.248	731.107	143.39	-2.35048	1.40249e-119	5.41501e-118	down
LOC_Os01g34890	1267.82	685.028	1850.6	1.432	1.68233e-119	6.48474e-118	up
novel.375	891.079	422.761	1359.4	1.68617	1.80745e-119	6.95555e-118	up
LOC_Os12g40900	2927.29	4035.52	1819.07	-1.14904	3.39387e-119	1.3039e-117	down
LOC_Os03g49440	1872.2	1205.61	2538.79	1.07483	8.26325e-119	3.16948e-117	up
LOC_Os08g41880	930.742	1365.96	495.52	-1.46279	1.06083e-118	4.06227e-117	down
LOC_Os04g51610	1472.07	896.704	2047.44	1.18994	1.13143e-118	4.32553e-117	up
LOC_Os03g05520	2020.1	2750.37	1289.82	-1.09118	1.2368e-118	4.71296e-117	down
LOC_Os05g28780	783.065	380.015	1186.12	1.64299	1.71969e-118	6.5424e-117	up
LOC_Os06g46140	478.208	171.726	784.689	2.19469	1.79218e-118	6.80709e-117	up
LOC_Os01g58550	995.664	1466.85	524.475	-1.48508	3.02218e-118	1.14603e-116	down
LOC_Os03g21480	538.939	859.17	218.708	-1.97225	5.07881e-118	1.92279e-116	down
LOC_Os10g41040	489.108	176.317	801.9	2.18064	8.93278e-118	3.37639e-116	up
LOC_Os11g05360	1056.44	562.842	1550.04	1.46069	1.08047e-117	4.07733e-116	up
LOC_Os04g03796	1253.47	1777.15	729.8	-1.28365	1.0898e-117	4.10591e-116	down
LOC_Os05g19570	1651	2281.05	1020.96	-1.16033	2.18349e-117	8.20002e-116	down
LOC_Os05g34980	1291.02	1820.62	761.423	-1.25828	2.22219e-117	8.33198e-116	down
LOC_Os04g01320	615.364	954.837	275.891	-1.79156	2.26149e-117	8.46571e-116	down
LOC_Os03g43410	2175.78	2912.76	1438.81	-1.01682	2.64786e-117	9.89622e-116	down
LOC_Os10g39170	1432.72	2002.26	863.18	-1.2152	3.91593e-117	1.46122e-115	down
LOC_Os12g24020	810.719	377.336	1244.1	1.71547	1.10289e-116	4.1023e-115	up
LOC_Os12g43490	567.601	231.659	903.543	1.96593	1.28622e-116	4.77661e-115	up
LOC_Os01g71624	271.233	25.8065	516.66	4.30551	1.38167e-116	5.11918e-115	up
LOC_Os09g39410	1866.93	1203.1	2530.77	1.0718	1.38285e-116	5.11918e-115	up
LOC_Os01g27390	460.766	754.652	166.881	-2.17761	2.50043e-116	9.24172e-115	down
LOC_Os02g37360	285.381	52.8287	517.933	3.29782	3.93672e-116	1.45273e-114	up
LOC_Os09g36220	667.801	308.29	1027.31	1.7371	4.10625e-116	1.5129e-114	up
LOC_Os09g31120	1151.29	646.121	1656.46	1.35838	5.10392e-116	1.87752e-114	up
LOC_Os12g08760	1040.49	517.083	1563.89	1.59414	1.24338e-115	4.55951e-114	up
LOC_Os01g09280	573.217	244.593	901.841	1.88569	1.47501e-115	5.40042e-114	up
LOC_Os06g48300	275.173	42.81	507.536	3.56903	2.71436e-115	9.92251e-114	up
LOC_Os01g09540	583.212	910.065	256.359	-1.82738	4.71624e-115	1.71867e-113	down
LOC_Os06g50900	1186.9	689.842	1683.95	1.28813	5.06064e-115	1.8413e-113	up
LOC_Os03g16350	643.995	291.636	996.353	1.77375	6.17147e-115	2.24198e-113	up
LOC_Os08g01950	1002.27	1461.91	542.633	-1.4314	7.03426e-115	2.55145e-113	down
LOC_Os10g32930	299.278	62.4798	536.076	3.10166	7.08214e-115	2.56483e-113	up
LOC_Os03g16960	353.457	92.8685	614.045	2.71858	5.58054e-114	2.01789e-112	up
LOC_Os08g38560	1538.54	2118.78	958.306	-1.14533	1.65271e-113	5.96685e-112	down
LOC_Os02g32580	486.621	784.491	188.75	-2.05627	2.06124e-113	7.43032e-112	down
LOC_Os03g14880	1575	2218.02	931.968	-1.25015	3.56499e-113	1.28115e-111	down
LOC_Os03g36080	1307.74	770.063	1845.42	1.26071	3.57727e-113	1.28359e-111	up
LOC_Os09g20240	2277.82	3094.89	1460.75	-1.08387	6.34351e-113	2.27267e-111	down
LOC_Os01g50200	797.118	1194.45	399.786	-1.57979	6.79262e-113	2.42984e-111	down
LOC_Os12g12590	1058.72	597.357	1520.09	1.34666	8.29927e-113	2.96426e-111	up
LOC_Os07g44330	1503.79	910.17	2097.41	1.20464	2.98412e-112	1.06422e-110	up
LOC_Os08g37660	378.58	111.311	645.848	2.54874	9.00479e-112	3.1967e-110	up
LOC_Os07g48760	904.518	1316.9	492.133	-1.41962	1.70156e-111	6.03136e-110	down
LOC_Os10g40810	730.419	1104.53	356.306	-1.63262	4.22759e-111	1.49398e-109	down
LOC_Os04g19740	1041.25	582.61	1499.89	1.36545	8.94209e-111	3.15526e-109	up
LOC_Os05g46610	1095.66	631.806	1559.52	1.30384	1.1601e-110	4.08729e-109	up
LOC_Os07g26640	653.834	303.817	1003.85	1.72055	1.4278e-110	5.02288e-109	up
LOC_Os02g53180	351.073	102.692	599.454	2.54999	1.78493e-110	6.26979e-109	up
LOC_Os05g48930	366.563	114.154	618.972	2.43615	1.86042e-110	6.52516e-109	up
LOC_Os12g40180	256.711	28.5027	484.919	4.0868	3.78971e-110	1.32719e-108	up
LOC_Os04g47700	1342.48	801.856	1883.11	1.23104	4.09071e-110	1.43046e-108	up
LOC_Os07g44920	295.55	64.0468	527.053	3.03749	6.07931e-110	2.12267e-108	up
LOC_Os01g71710	829.665	1226.23	433.103	-1.50314	8.54985e-110	2.98084e-108	down
LOC_Os03g02550	1449.6	2019.47	879.732	-1.19856	1.83411e-109	6.36597e-108	down
LOC_Os01g43320	304.773	76.6375	532.909	2.79597	2.06336e-109	7.15104e-108	up
LOC_Os12g37980	533.821	228.82	838.823	1.87386	3.76906e-109	1.30432e-107	up
LOC_Os08g04340	251.867	30.332	473.402	3.95471	3.85432e-109	1.33185e-107	up
LOC_Os02g45160	793.454	398.981	1187.93	1.57278	4.77283e-109	1.6468e-107	up
LOC_Os03g13950	1889.8	1244.71	2534.9	1.0262	5.0498e-109	1.7398e-107	up
LOC_Os05g34170	2717.64	3757.73	1677.54	-1.16421	6.79608e-109	2.33799e-107	down
LOC_Os09g27010	678.291	316.854	1039.73	1.71697	1.14939e-108	3.93673e-107	up
LOC_Os11g23080	250.716	24.6014	476.83	4.26731	1.31716e-108	4.50477e-107	up
LOC_Os09g31130	313.016	78.7898	547.242	2.80555	2.33692e-108	7.98073e-107	up
LOC_Os08g05780	791.026	381.695	1200.36	1.65223	2.95151e-108	1.00649e-106	up
LOC_Os01g03640	320.292	630.096	10.4874	-5.91885	3.30011e-108	1.12372e-106	down
LOC_Os01g41240	244.674	25.394	463.955	4.18743	5.52253e-108	1.87774e-106	up
LOC_Os03g16920	308.195	11.9415	604.448	5.66815	7.40794e-108	2.51514e-106	up
LOC_Os12g02060	247.912	23.1347	472.69	4.33663	7.96314e-108	2.69973e-106	up
LOC_Os05g09020	437.19	157.608	716.773	2.18237	1.12231e-107	3.79943e-106	up
LOC_Os01g08810	693.882	343.422	1044.34	1.60586	1.16365e-107	3.93367e-106	up
LOC_Os11g31060	377.832	9.60683	746.058	6.29446	1.58954e-107	5.36561e-106	up
LOC_Os01g65920	1336.33	816.333	1856.33	1.18409	2.09669e-107	7.06733e-106	up
LOC_Os07g31884	287.61	65.0943	510.127	2.98021	3.36983e-107	1.13423e-105	up
LOC_Os01g24550	333.69	570.867	96.5129	-2.56573	3.55495e-107	1.19482e-105	down
LOC_Os06g39370	244.657	23.4208	465.893	4.33239	1.18028e-106	3.96121e-105	up
LOC_Os01g48710	1567.13	2166.48	967.781	-1.16308	1.72758e-106	5.77318e-105	down
LOC_Os06g48030	2350.6	1514.37	3186.84	1.07202	2.83529e-106	9.46136e-105	up
LOC_Os09g31478	1361.98	832.817	1891.14	1.18294	3.30303e-106	1.10065e-104	up
LOC_Os11g04350	1917.71	2602.65	1232.77	-1.07792	6.10261e-106	2.02487e-104	down
LOC_Os01g58290	558.574	225.573	891.576	1.98327	8.53468e-106	2.82782e-104	up
LOC_Os08g28710	246.583	21.086	472.081	4.50747	9.74758e-106	3.22512e-104	up
LOC_Os02g45010	1230.23	1718.02	742.432	-1.20975	3.06811e-105	1.01226e-103	down
LOC_Os01g42860	482.548	188.178	776.918	2.04109	3.24294e-105	1.06843e-103	up
LOC_Os09g12290	721.961	361.096	1082.83	1.58351	1.72054e-104	5.66056e-103	up
LOC_Os06g06050	1198.21	716.048	1680.37	1.23014	2.42186e-104	7.94553e-103	up
LOC_Os03g57120	2375.29	1581.33	3169.26	1.00291	3.68301e-104	1.20661e-102	up
LOC_Os12g09540	305.848	74.4575	537.238	2.86259	4.9296e-104	1.61275e-102	up
LOC_Os10g09850	339.552	9.32642	669.778	6.13934	8.0881e-104	2.64238e-102	up
LOC_Os07g04560	271.226	60.0203	482.432	3.00499	1.41818e-103	4.6267e-102	up
LOC_Os03g18030	259.005	50.5693	467.44	3.2073	1.49273e-103	4.86312e-102	up
LOC_Os04g54830	858.952	458.752	1259.15	1.45552	3.71996e-103	1.21023e-101	up
LOC_Os10g31740	236.388	455.349	17.427	-4.69713	5.15355e-103	1.67429e-101	down
LOC_Os04g54310	234.825	28.016	441.634	3.96992	9.83717e-103	3.18705e-101	up
LOC_Os07g03590	243.72	40.4192	447.021	3.4673	1.2236e-102	3.95874e-101	up
LOC_Os06g38320	748.258	386.939	1109.58	1.51904	1.28194e-102	4.14174e-101	up
LOC_Os02g07160	345.776	95.7713	595.781	2.62916	1.67775e-102	5.41306e-101	up
LOC_Os02g56370	315.254	543.532	86.9751	-2.64445	2.43719e-102	7.85244e-101	down
LOC_Os01g39136	238.992	18.5837	459.401	4.62087	4.97742e-102	1.60148e-100	up
LOC_Os02g17000	233.041	23.7459	442.336	4.21701	5.36879e-102	1.72503e-100	up
LOC_Os07g19000	266.158	59.2714	473.044	2.99336	5.49032e-102	1.76042e-100	up
LOC_Os05g36290	1897.93	1254.14	2541.73	1.01931	5.49402e-102	1.76042e-100	up
LOC_Os05g47940	1789.54	1119.78	2459.29	1.13321	1.2141e-101	3.87964e-100	up
LOC_Os02g02370	938.484	1346.44	530.531	-1.34244	1.38229e-101	4.41104e-100	down
LOC_Os08g43430	613.97	934.94	293.001	-1.67296	1.42208e-101	4.53185e-100	down
LOC_Os10g21590	246.065	43.44	448.689	3.3768	1.44285e-101	4.59175e-100	up
LOC_Os06g35700	440.195	168.724	711.666	2.0775	2.08536e-101	6.62747e-100	up
LOC_Os07g01090	604.761	922.723	286.799	-1.68542	2.09136e-101	6.63751e-100	down
LOC_Os04g54300	251.904	45.5124	458.296	3.34123	3.51261e-101	1.1103e-99	up
LOC_Os01g06500	514.001	217.489	810.513	1.89981	3.61134e-101	1.13996e-99	up
LOC_Os04g40490	658.556	991.924	325.187	-1.6084	7.56772e-101	2.38562e-99	down
LOC_Os10g36650	1717.89	2301.53	1134.26	-1.02103	1.4114e-100	4.43728e-99	down
LOC_Os04g44320	1037.03	1463.57	610.483	-1.262	1.62081e-100	5.08876e-99	down
LOC_Os11g11980	878.425	1281.3	475.553	-1.43044	1.79571e-100	5.63034e-99	down
LOC_Os03g63330	878.622	487.602	1269.64	1.38072	2.34109e-100	7.33049e-99	up
LOC_Os02g01590	403.465	656.155	150.776	-2.12367	3.14175e-100	9.7998e-99	down
LOC_Os05g04500	1661.7	1068.75	2254.65	1.07601	3.14228e-100	9.7998e-99	up
LOC_Os05g02300	1228.47	1714.61	742.32	-1.20747	3.29005e-100	1.0247e-98	down
LOC_Os06g12410	935.047	1343.18	526.918	-1.35039	7.34723e-100	2.28527e-98	down
LOC_Os01g47300	261.834	13.2145	510.453	5.3038	9.33039e-100	2.8944e-98	up
LOC_Os07g38630	1464.38	2030.04	898.716	-1.1747	1.01697e-99	3.15057e-98	down
LOC_Os02g47780	2323.05	3121.03	1525.08	-1.03302	1.59657e-99	4.9331e-98	down
LOC_Os11g13570	1098.32	628.228	1568.4	1.32086	1.64469e-99	5.07508e-98	up
LOC_Os05g36280	1791.55	2416.76	1166.34	-1.0507	3.71201e-99	1.14241e-97	down
LOC_Os03g12030	814.572	1200.5	428.648	-1.48839	3.91111e-99	1.2021e-97	down
LOC_Os03g18630	928.168	1336.08	520.253	-1.36058	8.58718e-99	2.63585e-97	down
LOC_Os05g16824	750.798	393.901	1107.7	1.48972	9.83047e-99	3.01352e-97	up
LOC_Os06g05470	306.183	88.948	523.418	2.55243	1.12984e-98	3.45896e-97	up
LOC_Os10g42030	270.509	65.1759	475.843	2.87358	1.98446e-98	6.06741e-97	up
LOC_Os12g28770	797.577	402.297	1192.86	1.56514	3.04378e-98	9.29406e-97	up
LOC_Os01g53350	888.834	1319.68	457.985	-1.52812	3.89554e-98	1.18794e-96	down
LOC_Os01g05650	2936.07	1217.3	4654.83	1.93548	3.92409e-98	1.19508e-96	up
LOC_Os03g44890	570.831	883.565	258.097	-1.77462	2.18116e-97	6.61686e-96	down
LOC_Os02g15810	2783.51	3762.87	1804.14	-1.06061	3.83802e-97	1.1613e-95	down
LOC_Os11g10470	353.394	122.126	584.663	2.25777	4.40886e-97	1.3323e-95	up
LOC_Os03g08520	344.574	8.15873	680.99	6.38369	5.62123e-97	1.69646e-95	up
LOC_Os02g02140	1326.15	1843.82	808.483	-1.19074	6.77824e-97	2.04301e-95	down
LOC_Os04g56400	679.719	349.261	1010.18	1.53098	7.44414e-97	2.24082e-95	up
LOC_Os10g31320	237.647	15.8932	459.4	4.84779	1.50655e-96	4.52915e-95	up
LOC_Os05g04210	230.417	17.9089	442.926	4.64785	1.27754e-95	3.82102e-94	up
LOC_Os03g09910	255.971	59.5898	452.353	2.92098	1.53036e-95	4.5713e-94	up
LOC_Os08g20570	1795.82	2424.05	1167.6	-1.05375	2.3512e-95	6.99638e-94	down
LOC_Os07g07410	864.564	480.36	1248.77	1.37939	2.51109e-95	7.46266e-94	up
LOC_Os10g22600	321.081	102.075	540.087	2.40135	2.9101e-95	8.62652e-94	up
LOC_Os11g45990	262.27	11.4044	513.136	5.51552	3.30619e-95	9.78824e-94	up
LOC_Os11g29720	458.535	719.594	197.476	-1.86562	4.67125e-95	1.38121e-93	down
LOC_Os03g51580	1692.78	2307.22	1078.35	-1.0972	4.8453e-95	1.43086e-93	down
LOC_Os03g51610	478.472	210.098	746.846	1.83253	6.76203e-95	1.99186e-93	up
LOC_Os10g09160	556.11	847.539	264.681	-1.68043	1.29524e-94	3.81051e-93	down
LOC_Os09g30300	1357.95	856.477	1859.43	1.11761	1.45623e-94	4.27875e-93	up
LOC_Os03g18200	481.313	196.583	766.044	1.96588	2.06699e-94	6.06568e-93	up
LOC_Os04g46820	231.177	449.722	12.6314	-5.147	2.31e-94	6.77029e-93	down
LOC_Os01g47290	249.911	11.9795	487.843	5.3201	2.42536e-94	7.09949e-93	up
LOC_Os05g50380	517.778	226.82	808.736	1.83835	2.87522e-94	8.40578e-93	up
LOC_Os01g51840	1501.77	2044.36	959.187	-1.09036	2.90255e-94	8.47508e-93	down
LOC_Os08g39330	691.004	1025.92	356.092	-1.52897	3.23626e-94	9.43768e-93	down
LOC_Os03g06680	524.682	805.602	243.761	-1.72445	3.74948e-94	1.09207e-92	down
LOC_Os02g33590	213.065	20.0753	406.055	4.34095	3.81138e-94	1.10872e-92	up
LOC_Os03g25300	304.924	520.204	89.6431	-2.53412	5.50992e-94	1.60082e-92	down
LOC_Os05g28740	300.154	89.6577	510.651	2.51804	6.91738e-94	2.00475e-92	up
LOC_Os03g45960	704.733	356.982	1052.48	1.55859	1.40072e-93	4.04944e-92	up
novel.1018	221.035	30.2442	411.827	3.7687	1.46438e-93	4.22824e-92	up
LOC_Os07g44550	1594.74	1008.54	2180.95	1.11192	2.45665e-93	7.08456e-92	up
LOC_Os03g26870	259.249	64.9521	453.546	2.79998	2.4664e-93	7.10389e-92	up
LOC_Os02g13870	220.631	15.9186	425.344	4.708	3.396e-93	9.75733e-92	up
LOC_Os08g44270	1572.32	2146.41	998.229	-1.10613	7.51788e-93	2.15209e-91	down
LOC_Os08g03610	241.895	433.665	50.1247	-3.11128	4.43819e-92	1.26738e-90	down
LOC_Os05g12580	381.052	630.901	131.204	-2.26156	5.69046e-92	1.61904e-90	down
LOC_Os06g38960	1047.83	1474.98	620.669	-1.24721	5.92439e-92	1.68355e-90	down
LOC_Os02g36940	1293.97	1764.39	823.544	-1.09901	7.88731e-92	2.23864e-90	down
LOC_Os01g03680	1423.98	1961.63	886.328	-1.14651	9.19522e-92	2.60669e-90	down
LOC_Os03g49270	917.305	1310.35	524.259	-1.32182	9.22692e-92	2.6125e-90	down
LOC_Os01g41010	1458.41	924.611	1992.22	1.10766	1.06649e-91	3.016e-90	up
LOC_Os06g46900	370.687	139.773	601.602	2.10478	1.1015e-91	3.10749e-90	up
LOC_Os04g52720	273.469	9.44479	537.494	5.8206	1.7887e-91	5.04009e-90	up
LOC_Os03g02240	803.621	1168.37	438.876	-1.41403	1.83663e-91	5.16891e-90	down
LOC_Os07g03730	226.748	46.3056	407.191	3.13921	2.15039e-91	6.04465e-90	up
LOC_Os01g70550	746.735	1089.47	403.999	-1.4317	2.62102e-91	7.34986e-90	down
LOC_Os01g43700	631.126	316.031	946.221	1.58239	3.17563e-91	8.89442e-90	up
LOC_Os03g16334	449.046	192.59	705.501	1.87096	4.07536e-91	1.14007e-89	up
LOC_Os12g03050	236.438	49.0097	423.867	3.09836	4.41487e-91	1.23357e-89	up
LOC_Os10g20470	395.141	159.311	630.971	1.986	5.2117e-91	1.45448e-89	up
LOC_Os06g06510	1233.3	1692.32	774.278	-1.12847	5.47107e-91	1.52504e-89	down
LOC_Os04g13210	235.53	51.9545	419.105	3.02004	8.15672e-91	2.27095e-89	up
LOC_Os05g39050	1599.28	2148.73	1049.83	-1.03263	1.76884e-90	4.91299e-89	down
LOC_Os01g22670	758.71	1102.29	415.125	-1.41057	1.85961e-90	5.15899e-89	down
LOC_Os04g35140	1167.91	720.087	1615.74	1.16529	2.76244e-90	7.65456e-89	up
LOC_Os01g70950	786.59	437.225	1135.95	1.37861	4.29573e-90	1.18891e-88	up
LOC_Os08g34640	783.151	440.566	1125.74	1.3538	4.51462e-90	1.24801e-88	up
LOC_Os11g35340	1233.92	1685.72	782.119	-1.10904	5.09762e-90	1.40751e-88	down
LOC_Os01g56180	575.594	284.669	866.519	1.60675	5.72202e-90	1.57433e-88	up
LOC_Os09g30190	1355.48	1833.19	877.765	-1.06326	6.14512e-90	1.68875e-88	down
LOC_Os03g50490	214	37.6976	390.302	3.37138	9.55584e-90	2.61989e-88	up
LOC_Os01g56030	1577.57	2110.16	1044.98	-1.01485	1.05089e-89	2.87783e-88	down
LOC_Os02g14980	532.142	246.999	817.286	1.72239	1.18374e-89	3.23782e-88	up
LOC_Os08g31410	628.287	317.903	938.671	1.5632	1.32718e-89	3.62592e-88	up
LOC_Os03g27280	1149.14	712.347	1585.94	1.15439	1.43383e-89	3.91272e-88	up
LOC_Os05g32170	829.517	1188.19	470.847	-1.33379	1.86917e-89	5.09475e-88	down
LOC_Os08g43390	316.262	524.102	108.422	-2.27127	2.65753e-89	7.23512e-88	down
LOC_Os05g10650	305.259	94.7459	515.772	2.44759	2.97621e-89	8.09329e-88	up
LOC_Os07g37110	327.706	537.842	117.569	-2.19529	5.4472e-89	1.47783e-87	down
LOC_Os11g37260	243.435	56.2756	430.593	2.9278	5.88394e-89	1.59446e-87	up
LOC_Os08g26820	979.328	1385.17	573.483	-1.27435	9.46954e-89	2.56314e-87	down
LOC_Os04g53560	398.723	639.581	157.865	-2.01581	2.68988e-88	7.25554e-87	down
LOC_Os01g06640	527.381	249.308	805.455	1.69079	3.52316e-88	9.48127e-87	up
LOC_Os07g16970	647.396	335.333	959.459	1.51623	4.35869e-88	1.17163e-86	up
LOC_Os06g11840	292.678	490.282	95.0743	-2.36827	4.60127e-88	1.234e-86	down
LOC_Os01g36240	1549.03	1020.36	2077.69	1.02442	4.94183e-88	1.32381e-86	up
LOC_Os06g01250	278.232	80.0209	476.444	2.57313	7.97311e-88	2.13338e-86	up
LOC_Os05g31830	212.49	385.716	39.264	-3.30389	8.89582e-88	2.37755e-86	down
LOC_Os03g51010	324.796	115.016	534.577	2.21603	9.71074e-88	2.58942e-86	up
LOC_Os07g27390	242.772	54.6817	430.862	2.99274	1.17882e-87	3.1398e-86	up
LOC_Os07g34520	215.698	12.7908	418.606	5.02073	1.19648e-87	3.18322e-86	up
LOC_Os09g34160	306.406	96.8805	515.931	2.41775	1.29245e-87	3.43462e-86	up
LOC_Os08g31510	1089.67	1514.97	664.363	-1.18995	1.49458e-87	3.96726e-86	down
LOC_Os02g45930	1091.79	631.426	1552.15	1.29381	1.58927e-87	4.21382e-86	up
LOC_Os07g48500	321.537	106.719	536.355	2.32914	2.22346e-87	5.88864e-86	up
LOC_Os01g65880	664.408	978.727	350.088	-1.48198	2.75177e-87	7.27958e-86	down
LOC_Os03g46150	630.496	329.727	931.265	1.49824	2.97516e-87	7.86162e-86	up
LOC_Os06g03800	1057.99	1459.71	656.263	-1.15346	5.19198e-87	1.37039e-85	down
LOC_Os03g06670	1117.32	1536.16	698.475	-1.13798	5.21797e-87	1.37569e-85	down
LOC_Os02g33780	435.992	705.572	166.412	-2.08336	5.79282e-87	1.52553e-85	down
LOC_Os06g12180	788.255	1141.02	435.489	-1.38941	6.24518e-87	1.64281e-85	down
LOC_Os11g37880	451.124	180.541	721.707	1.99983	9.39542e-87	2.46593e-85	up
LOC_Os04g43560	384.766	612.137	157.396	-1.96072	1.25741e-86	3.28913e-85	down
LOC_Os02g08270	198.498	28.7519	368.244	3.68944	1.2985e-86	3.3928e-85	up
LOC_Os11g45970	625.19	922.295	328.086	-1.49085	3.16515e-86	8.25165e-85	down
LOC_Os06g34020	603.285	304.741	901.829	1.56167	3.87603e-86	1.00712e-84	up
LOC_Os04g45130	445.059	199.049	691.069	1.79693	1.40341e-85	3.6344e-84	up
LOC_Os12g15680	694.147	370.028	1018.27	1.45929	1.47991e-85	3.82825e-84	up
LOC_Os04g40730	895.765	1261.96	529.569	-1.25302	2.71361e-85	7.00412e-84	down
LOC_Os04g58760	1844.75	2474.74	1214.75	-1.02641	2.79039e-85	7.19435e-84	down
LOC_Os03g06390	663.002	320.074	1005.93	1.64864	3.98499e-85	1.0263e-83	up
LOC_Os03g06520	649.271	341.296	957.246	1.48682	4.81734e-85	1.2393e-83	up
LOC_Os02g10730	1402.93	1874.02	931.839	-1.00789	1.00819e-84	2.5845e-83	down
LOC_Os03g55050	405.256	169.188	641.325	1.91885	1.01017e-84	2.5845e-83	up
LOC_Os02g39360	1331.35	874.977	1787.72	1.03116	1.26089e-84	3.22244e-83	up
LOC_Os02g41510	197.638	32.9596	362.316	3.45876	2.0782e-84	5.29963e-83	up
LOC_Os08g05970	190.015	348.753	31.2761	-3.48047	2.29408e-84	5.84376e-83	down
LOC_Os06g44190	204.909	31.0056	378.812	3.61627	3.65249e-84	9.28383e-83	up
LOC_Os05g28770	567.62	847.428	287.813	-1.55784	4.04077e-84	1.02596e-82	down
LOC_Os03g49830	1367.88	1854.3	881.466	-1.07311	5.03368e-84	1.27529e-82	down
LOC_Os04g49460	198.629	32.7789	364.479	3.46887	5.63944e-84	1.42721e-82	up
LOC_Os04g56420	712.908	1033.66	392.156	-1.39753	6.57683e-84	1.66085e-82	down
LOC_Os04g56560	197.293	14.2575	380.329	4.73639	7.36547e-84	1.85799e-82	up
LOC_Os03g50970	893.966	1296.23	491.7	-1.39758	1.18519e-83	2.98329e-82	down
LOC_Os11g31590	1320.94	1785.26	856.631	-1.06037	2.30031e-83	5.77152e-82	down
LOC_Os12g31860	268.626	82.2299	455.021	2.47297	2.65888e-83	6.66404e-82	up
LOC_Os02g42585	188.259	20.3557	356.163	4.14896	3.21948e-83	8.06044e-82	up
LOC_Os12g05840	214.905	47.6477	382.163	3.00581	3.31746e-83	8.29685e-82	up
LOC_Os03g08600	1130.51	693.26	1567.75	1.17844	3.34339e-83	8.35276e-82	up
LOC_Os06g45184	187.743	17.2665	358.219	4.37065	4.38213e-83	1.09361e-81	up
LOC_Os06g45890	366.99	146.956	587.023	2.00257	6.41937e-83	1.59862e-81	up
LOC_Os06g05440	531.083	264.888	797.278	1.5895	8.54031e-83	2.12453e-81	up
LOC_Os04g01490	1116.34	705.109	1527.57	1.1163	1.15017e-82	2.85817e-81	up
LOC_Os02g46850	1351.49	1829	873.974	-1.0664	1.23826e-82	3.07381e-81	down
LOC_Os11g37670	948.832	1328.13	569.532	-1.22367	1.26403e-82	3.13444e-81	down
LOC_Os03g12110	706.463	393.125	1019.8	1.37464	1.4621e-82	3.62175e-81	up
LOC_Os05g04000	236.388	62.2803	410.496	2.71605	1.98124e-82	4.89214e-81	up
LOC_Os06g44170	329.324	120.54	538.108	2.15926	2.05919e-82	5.07927e-81	up
LOC_Os01g55260	1542.35	2115.39	969.308	-1.12675	2.1831e-82	5.37923e-81	down
LOC_Os09g17152	184.659	19.5575	349.761	4.1513	4.43876e-82	1.09142e-80	up
LOC_Os04g53190	998.662	610.216	1387.11	1.18331	5.16184e-82	1.26788e-80	up
LOC_Os05g47670	1064.75	666.537	1462.96	1.13591	6.35432e-82	1.55915e-80	up
LOC_Os04g35540	832.621	486.256	1178.99	1.27597	1.40854e-81	3.44885e-80	up
LOC_Os01g73960	1369.82	898.289	1841.34	1.0373	3.28639e-81	8.0216e-80	up
LOC_Os03g09170	923.688	559.084	1288.29	1.2044	3.30115e-81	8.04922e-80	up
LOC_Os07g23410	465.496	220.836	710.155	1.68432	3.59e-81	8.7444e-80	up
LOC_Os03g17100	5765.63	8204.15	3327.12	-1.30205	3.59914e-81	8.75754e-80	down
LOC_Os04g55610	318.188	518.064	118.311	-2.13201	4.35425e-81	1.05839e-79	down
LOC_Os08g09020	191.086	14.0762	368.095	4.72327	6.62205e-81	1.60795e-79	up
LOC_Os06g36390	204.732	44.6575	364.806	3.03438	1.37205e-80	3.32465e-79	up
LOC_Os09g21120	183.694	27.9655	339.422	3.60677	2.01295e-80	4.86755e-79	up
LOC_Os10g05130	769.419	1106.37	432.466	-1.35663	2.20069e-80	5.31602e-79	down
LOC_Os06g46740	325.375	5.65578	645.095	6.80495	4.94146e-80	1.1912e-78	up
LOC_Os10g37110	335.633	129.128	542.138	2.07309	5.48493e-80	1.32085e-78	up
LOC_Os07g01440	1492.11	2022.42	961.798	-1.07385	9.78864e-80	2.35482e-78	down
LOC_Os01g21420	351.089	137.227	564.951	2.03722	1.29345e-79	3.09885e-78	up
LOC_Os04g51820	175.896	335.678	16.1143	-4.36982	1.65689e-79	3.96144e-78	down
LOC_Os01g59120	1238.44	1676.62	800.255	-1.06767	1.67255e-79	3.9948e-78	down
novel.931	185.223	337.148	33.297	-3.33165	4.02231e-79	9.57769e-78	down
LOC_Os08g01160	577.473	878.254	276.691	-1.66635	4.36803e-79	1.03903e-77	down
LOC_Os08g05960	250.85	425.554	76.1473	-2.4784	7.92653e-79	1.87405e-77	down
LOC_Os05g01120	422.862	187.132	658.592	1.81926	8.89615e-79	2.09904e-77	up
LOC_Os11g17720	170.817	320.931	20.7031	-3.94628	1.53745e-78	3.61665e-77	down
LOC_Os01g42690	551.81	285.107	818.512	1.52091	1.58905e-78	3.73427e-77	up
LOC_Os01g72100	983.305	1352.78	613.825	-1.1388	1.92529e-78	4.51534e-77	down
LOC_Os04g50920	711.647	1022.95	400.338	-1.35304	2.73606e-78	6.4104e-77	down
LOC_Os07g40910	529.02	261.791	796.248	1.60598	2.74541e-78	6.42585e-77	up
LOC_Os03g55120	1063.73	1448.78	678.675	-1.09321	3.46296e-78	8.09723e-77	down
LOC_Os08g06280	710.108	394.588	1025.63	1.38188	4.05488e-78	9.47179e-77	up
LOC_Os11g12320	349.525	560.402	138.648	-2.01608	4.57663e-78	1.06692e-76	down
LOC_Os01g55220	888.706	1232.67	544.746	-1.17781	5.60979e-78	1.30517e-76	down
LOC_Os02g41580	1217.85	736.412	1699.29	1.20814	7.08457e-78	1.64665e-76	up
LOC_Os05g33900	660.3	953.604	366.997	-1.37939	8.92216e-78	2.06964e-76	down
LOC_Os02g13800	1241.32	484.852	1997.78	2.04226	1.4657e-77	3.38983e-76	up
LOC_Os09g35800	389.81	169.943	609.677	1.83826	1.689e-77	3.8947e-76	up
LOC_Os06g44870	497.768	750.328	245.208	-1.61338	1.80768e-77	4.16426e-76	down
LOC_Os12g34510	1258.02	1691.74	824.296	-1.03694	1.84361e-77	4.24284e-76	down
LOC_Os01g10310	201.144	10.0187	392.268	5.31453	2.19449e-77	5.04043e-76	up
LOC_Os03g16950	435.392	206.441	664.343	1.68618	4.29186e-77	9.80955e-76	up
LOC_Os03g04310	677.083	991.966	362.201	-1.45524	4.52133e-77	1.03239e-75	down
LOC_Os03g03790	293.943	480.261	107.625	-2.15694	5.06028e-77	1.1532e-75	down
LOC_Os08g01150	466.32	223.321	709.319	1.66547	6.3463e-77	1.44487e-75	up
LOC_Os10g04860	768.592	429.121	1108.06	1.36642	1.18103e-76	2.67841e-75	up
LOC_Os07g34580	1120.68	1513.84	727.527	-1.05701	1.99429e-76	4.5184e-75	down
LOC_Os06g48000	176.054	340.441	11.667	-4.86309	6.28286e-76	1.41525e-74	down
LOC_Os08g33740	998.44	1358.79	638.088	-1.09098	7.23755e-76	1.62873e-74	down
LOC_Os02g37500	186.377	333.243	39.5121	-3.07199	1.01077e-75	2.26806e-74	down
LOC_Os03g58170	462.369	218.697	706.042	1.68558	1.05106e-75	2.3562e-74	up
LOC_Os07g43604	246.743	6.87893	486.608	6.1625	1.22363e-75	2.73782e-74	up
LOC_Os12g39400	392.373	167.609	617.137	1.87517	1.3052e-75	2.91753e-74	up
LOC_Os04g35750	1772.31	2386.06	1158.56	-1.04226	1.65352e-75	3.69259e-74	down
LOC_Os03g49350	676.871	378.637	975.106	1.36352	1.8398e-75	4.10075e-74	up
LOC_Os02g45890	296.508	480.181	112.835	-2.09225	2.80968e-75	6.24465e-74	down
LOC_Os08g37432	251.047	77.4737	424.621	2.45621	3.10311e-75	6.89027e-74	up
LOC_Os07g01400	682.395	988.037	376.752	-1.39192	3.46463e-75	7.68569e-74	down
LOC_Os07g47540	577.741	308.391	847.092	1.45804	3.74221e-75	8.28571e-74	up
LOC_Os11g34110	169.496	21.7552	317.236	3.8472	3.98898e-75	8.82372e-74	up
LOC_Os09g02180	198.746	9.05159	388.441	5.40588	7.80262e-75	1.72107e-73	up
LOC_Os12g06220	680.359	969.482	391.235	-1.3094	8.80955e-75	1.94134e-73	down
LOC_Os02g32590	198.224	45.5062	350.942	2.95481	2.25084e-74	4.94148e-73	up
LOC_Os05g39580	528.204	777.204	279.204	-1.47739	2.38187e-74	5.22423e-73	down
LOC_Os06g50080	469.202	229.349	709.055	1.63055	4.14678e-74	9.08675e-73	up
LOC_Os06g34120	1123.27	1518.24	728.289	-1.06161	6.61017e-74	1.44711e-72	down
LOC_Os12g38770	635.637	912.377	358.896	-1.34658	9.20159e-74	2.01255e-72	down
LOC_Os04g46140	214.358	370.298	58.4167	-2.66329	1.18502e-73	2.58942e-72	down
LOC_Os05g07940	1177.01	767.29	1586.72	1.04856	1.61763e-73	3.52155e-72	up
LOC_Os08g03600	1033.18	1411.34	655.02	-1.10736	1.70128e-73	3.70021e-72	down
LOC_Os10g40480	177.296	317.735	36.856	-3.11064	1.96312e-73	4.25385e-72	down
LOC_Os03g31310	796.386	1120	472.769	-1.24401	2.42591e-73	5.24692e-72	down
LOC_Os06g48160	333.462	527.21	139.715	-1.91651	2.57742e-73	5.56948e-72	down
LOC_Os06g06460	1227.48	1680.02	774.938	-1.11584	2.83927e-73	6.12963e-72	down
LOC_Os04g41900	807.224	1127.3	487.144	-1.21125	2.95751e-73	6.379e-72	down
LOC_Os01g64470	194.128	45.0824	343.174	2.9265	2.98266e-73	6.42729e-72	up
LOC_Os02g43790	402.845	187.121	618.57	1.72559	3.22052e-73	6.93346e-72	up
LOC_Os12g07030	199.695	8.55812	390.832	5.52384	3.30871e-73	7.11677e-72	up
LOC_Os06g37750	519.904	768.253	271.555	-1.50132	3.74526e-73	8.04835e-72	down
LOC_Os05g26820	662.505	947.163	377.848	-1.32496	3.96481e-73	8.51232e-72	down
LOC_Os01g63230	589.062	315.469	862.656	1.45223	5.61033e-73	1.20231e-71	up
LOC_Os09g37230	1330.9	858.776	1803.03	1.07067	5.76316e-73	1.23393e-71	up
LOC_Os07g17970	744.101	1075.49	412.712	-1.38535	7.31448e-73	1.56178e-71	down
LOC_Os04g45520	207.029	361.28	52.777	-2.77559	1.12443e-72	2.3965e-71	down
LOC_Os01g45700	879.155	1217.3	541.014	-1.17039	1.1582e-72	2.46622e-71	down
LOC_Os11g39540	578.865	314.558	843.173	1.42421	1.55752e-72	3.31047e-71	up
LOC_Os06g11730	315.843	506.077	125.61	-2.00985	1.72036e-72	3.65326e-71	down
LOC_Os10g31640	5215.32	7584.77	2845.87	-1.41425	1.95478e-72	4.1473e-71	down
LOC_Os01g55000	277.606	452.395	102.816	-2.13729	2.92082e-72	6.19124e-71	down
LOC_Os08g31170	167.553	304.515	30.5907	-3.31661	2.97355e-72	6.2973e-71	down
LOC_Os11g36160	341.878	541.372	142.384	-1.92496	3.58902e-72	7.59383e-71	down
LOC_Os05g02450	394.1	180.922	607.277	1.746	4.30478e-72	9.09181e-71	up
LOC_Os07g37290	291.651	99.467	483.836	2.27634	7.57266e-72	1.59504e-70	up
LOC_Os01g33810	554.756	814.585	294.927	-1.46702	7.60485e-72	1.60038e-70	down
LOC_Os04g37500	808.787	1125.35	492.22	-1.19325	9.4269e-72	1.98024e-70	down
LOC_Os06g45140	774.62	1087.37	461.869	-1.23529	1.4685e-71	3.07923e-70	down
LOC_Os01g65660	184.559	40.8124	328.305	3.01046	1.97384e-71	4.13515e-70	up
LOC_Os10g31530	1491.67	2011.82	971.528	-1.04982	2.02473e-71	4.23796e-70	down
LOC_Os11g40070	807.675	483.758	1131.59	1.22573	2.8022e-71	5.84956e-70	up
LOC_Os10g42130	415.691	189.067	642.314	1.76646	2.84407e-71	5.93166e-70	up
LOC_Os03g13300	1098	718.013	1477.98	1.04259	3.01459e-71	6.28171e-70	up
LOC_Os04g32830	480.377	713.889	246.866	-1.5332	4.77684e-71	9.92724e-70	down
LOC_Os05g49270	1125.84	1509.31	742.374	-1.02391	6.66121e-71	1.38188e-69	down
LOC_Os06g35650	419.58	638.045	201.115	-1.66828	7.5238e-71	1.55944e-69	down
LOC_Os01g24570	160.422	298.23	22.6134	-3.71361	8.34032e-71	1.72714e-69	down
LOC_Os03g52284	1002.73	1393.21	612.251	-1.18534	9.81308e-71	2.02853e-69	down
LOC_Os02g16500	531.948	790.709	273.186	-1.53085	1.18899e-70	2.45566e-69	down
LOC_Os08g02700	665.771	967.555	363.988	-1.40817	1.37396e-70	2.83269e-69	down
LOC_Os11g02350	922.041	573.742	1270.34	1.1464	1.48885e-70	3.06684e-69	up
LOC_Os01g49120	1140.66	759.983	1521.34	1.00015	2.66442e-70	5.46909e-69	up
LOC_Os04g15920	470.731	704.079	237.384	-1.56717	3.16201e-70	6.48476e-69	down
LOC_Os07g48450	916.867	563.41	1270.32	1.1724	3.80231e-70	7.79106e-69	up
LOC_Os01g57710	158.729	24.0201	293.438	3.62351	1.18987e-69	2.42533e-68	up
LOC_Os08g31340	549.647	801.577	297.717	-1.42866	2.09892e-69	4.26336e-68	down
LOC_Os02g45040	226.785	62.3868	391.183	2.63969	2.4939e-69	5.06124e-68	up
LOC_Os03g19560	275.755	102.531	448.979	2.12917	2.84358e-69	5.7659e-68	up
LOC_Os04g50960	610.836	876.661	345.011	-1.34542	3.04666e-69	6.17232e-68	down
LOC_Os05g44970	883.544	1219.91	547.18	-1.15553	5.3264e-69	1.07722e-67	down
LOC_Os01g21590	229.566	71.9999	387.133	2.42144	7.18518e-69	1.45189e-67	up
LOC_Os03g15080	250.396	411.74	89.0516	-2.21252	8.74191e-69	1.76493e-67	down
LOC_Os03g60570	153.436	16.7044	290.168	4.12304	8.76459e-69	1.76798e-67	up
LOC_Os10g30290	363.265	164.281	562.25	1.77212	9.59155e-69	1.93312e-67	up
LOC_Os06g50930	245.017	85.9073	404.126	2.23406	1.51485e-68	3.05047e-67	up
LOC_Os02g36500	895.107	1222.12	568.094	-1.10382	2.12437e-68	4.27049e-67	down
LOC_Os01g19220	399.106	605.139	193.072	-1.64869	2.17405e-68	4.3666e-67	down
LOC_Os01g14140	1055.86	1456.64	655.071	-1.15386	2.39897e-68	4.81423e-67	down
LOC_Os06g10580	874.552	1195.55	553.549	-1.11174	6.22781e-68	1.24658e-66	down
LOC_Os03g14150	1052.7	1417.28	688.117	-1.04228	6.46803e-68	1.29244e-66	down
LOC_Os03g52720	746.378	1037.15	455.609	-1.18601	6.84476e-68	1.36539e-66	down
LOC_Os01g19820	406.045	194.556	617.535	1.66422	8.46373e-68	1.68259e-66	up
LOC_Os05g17604	1025.82	659.939	1391.71	1.07798	8.57946e-68	1.70415e-66	up
LOC_Os03g48000	705.622	409.446	1001.8	1.2932	2.25644e-67	4.47058e-66	up
LOC_Os06g51110	758.722	1051.58	465.867	-1.17468	2.78302e-67	5.5092e-66	down
LOC_Os12g42400	1055.75	1411.43	700.067	-1.01192	2.98957e-67	5.91307e-66	down
LOC_Os04g34180	152.528	22.3228	282.734	3.65764	2.99942e-67	5.92753e-66	up
LOC_Os05g07810	157.034	24.8133	289.254	3.54504	3.34969e-67	6.60299e-66	up
LOC_Os03g43580	666.942	957.616	376.269	-1.35001	3.85545e-67	7.58715e-66	down
LOC_Os03g09230	854.166	535.802	1172.53	1.12844	4.29734e-67	8.44252e-66	up
LOC_Os04g52550	251.228	88.7847	413.671	2.22225	6.06977e-67	1.19146e-65	up
LOC_Os09g29510	614.77	354.06	875.48	1.30585	8.63878e-67	1.69148e-65	up
LOC_Os01g47050	541.57	292.088	791.051	1.43357	1.16154e-66	2.2705e-65	up
LOC_Os08g43120	751.855	1051.94	451.767	-1.21898	1.2122e-66	2.36755e-65	down
LOC_Os01g16810	345.246	154.604	535.887	1.79343	1.22649e-66	2.39345e-65	up
LOC_Os07g35810	984.202	1326.59	641.81	-1.04637	1.78932e-66	3.48887e-65	down
LOC_Os02g43770	318.533	137.981	499.085	1.85302	1.90392e-66	3.70306e-65	up
LOC_Os10g31240	724.182	1012.17	436.193	-1.21604	2.00135e-66	3.88931e-65	down
LOC_Os03g58764	953.523	582.193	1324.85	1.18208	2.16224e-66	4.19849e-65	up
LOC_Os07g46480	461.513	237.87	685.156	1.52951	3.00137e-66	5.81335e-65	up
LOC_Os05g51160	508.551	744.445	272.657	-1.45067	3.91587e-66	7.57208e-65	down
LOC_Os01g64790	149.05	15.0819	283.017	4.21353	5.90236e-66	1.13851e-64	up
LOC_Os03g19200	528.262	766.844	289.68	-1.40561	7.93109e-66	1.52857e-64	down
LOC_Os04g23550	245.657	4.98781	486.326	6.57681	9.43963e-66	1.81631e-64	up
LOC_Os03g50960	150.972	24.0014	277.942	3.54613	1.5831e-65	3.03609e-64	up
LOC_Os05g38270	578.942	319.185	838.7	1.39203	2.52785e-65	4.84398e-64	up
LOC_Os03g44170	237.194	389.26	85.128	-2.19127	2.92662e-65	5.60352e-64	down
LOC_Os01g43370	267.216	102.693	431.739	2.06892	3.11131e-65	5.95227e-64	up
LOC_Os11g03820	180.814	40.6503	320.977	2.9783	3.78147e-65	7.22843e-64	up
LOC_Os01g49310	734.121	1019.64	448.6	-1.18424	4.44529e-65	8.48345e-64	down
LOC_Os02g10520	577.14	843.985	310.295	-1.4463	4.64512e-65	8.85036e-64	down
LOC_Os04g08290	406.665	617.503	195.827	-1.65292	4.67376e-65	8.89766e-64	down
LOC_Os05g49760	465.487	686.291	244.684	-1.48586	4.69427e-65	8.92944e-64	down
LOC_Os07g48730	213.616	66.394	360.839	2.43863	6.6767e-65	1.26798e-63	up
LOC_Os01g11600	145.622	14.27	276.975	4.27961	7.61786e-65	1.44319e-63	up
LOC_Os03g58900	409.833	202.528	617.137	1.60392	9.76032e-65	1.84608e-63	up
LOC_Os10g35500	406.605	610.147	203.062	-1.58796	1.65444e-64	3.12165e-63	down
LOC_Os03g46920	775.478	1076.09	474.865	-1.17908	1.87796e-64	3.54054e-63	down
LOC_Os06g04169	801.073	495.024	1107.12	1.16253	2.23694e-64	4.21393e-63	up
LOC_Os10g23060	739.2	1032.69	445.714	-1.21077	2.33699e-64	4.39886e-63	down
LOC_Os07g12240	305.184	485.37	124.997	-1.95543	2.76505e-64	5.1962e-63	down
LOC_Os07g46520	792.891	485.713	1100.07	1.17869	3.73468e-64	7.01274e-63	up
LOC_Os03g12900	757.663	1043.1	472.222	-1.14345	3.86976e-64	7.26055e-63	down
LOC_Os03g43010	841.78	1149.14	534.421	-1.10567	8.11052e-64	1.51684e-62	down
LOC_Os01g11340	610.171	871.279	349.063	-1.32269	9.23312e-64	1.72403e-62	down
LOC_Os12g33150	182.439	318.07	46.8074	-2.76896	9.89125e-64	1.8425e-62	down
LOC_Os03g58920	574.425	319.509	829.341	1.37576	1.16675e-63	2.17164e-62	up
LOC_Os01g03370	511.826	741.662	281.99	-1.39571	1.19893e-63	2.22976e-62	down
LOC_Os11g38790	1089.87	720.052	1459.69	1.02101	1.35719e-63	2.52008e-62	up
LOC_Os08g26350	164.616	37.5224	291.709	2.96334	1.54831e-63	2.87267e-62	up
LOC_Os02g26810	173.615	44.1335	303.097	2.77906	1.5901e-63	2.94787e-62	up
LOC_Os06g07120	735.698	458.095	1013.3	1.14527	2.32449e-63	4.2957e-62	up
LOC_Os07g43800	824.505	1139.55	509.454	-1.16214	2.46457e-63	4.54738e-62	down
LOC_Os03g10800	773.699	1076.48	470.919	-1.19022	3.0159e-63	5.55148e-62	down
LOC_Os06g07030	980.37	622.875	1337.87	1.10274	3.49395e-63	6.4264e-62	up
LOC_Os04g41540	826.267	1139.74	512.79	-1.15219	4.5948e-63	8.43789e-62	down
LOC_Os02g44730	574.437	816.363	332.512	-1.29623	4.61304e-63	8.46474e-62	down
LOC_Os04g46280	473.643	691.394	255.891	-1.43257	5.02572e-63	9.21474e-62	down
LOC_Os04g40070	146.357	23.7024	269.011	3.49994	7.43132e-63	1.35828e-61	up
LOC_Os02g47450	459.973	678.788	241.158	-1.49485	7.53165e-63	1.37447e-61	down
LOC_Os01g68680	307.401	127.569	487.232	1.93081	7.82112e-63	1.42618e-61	up
LOC_Os02g50110	184.326	6.37983	362.273	5.81259	8.48473e-63	1.54478e-61	up
LOC_Os01g04330	584.336	328.246	840.426	1.35761	1.1672e-62	2.12341e-61	up
LOC_Os12g07310	260.034	101.638	418.429	2.04314	1.70553e-62	3.09794e-61	up
LOC_Os12g36810	642.678	901.984	383.372	-1.23514	1.83722e-62	3.33454e-61	down
LOC_Os01g04630	1156.25	758.888	1553.61	1.03321	2.27301e-62	4.1191e-61	up
LOC_Os01g07450	348.907	531.423	166.392	-1.67556	2.93043e-62	5.29404e-61	down
LOC_Os02g09850	584.657	338.914	830.399	1.29539	4.11393e-62	7.39779e-61	up
LOC_Os06g04990	245.662	93.0672	398.258	2.09657	7.51492e-62	1.34824e-60	up
LOC_Os01g33040	883.507	1207.63	559.38	-1.11084	1.37513e-61	2.46143e-60	down
LOC_Os08g06120	727.972	1001.7	454.246	-1.14158	1.55661e-61	2.78414e-60	down
LOC_Os08g04350	138.98	20.4124	257.547	3.65902	1.96802e-61	3.5146e-60	up
LOC_Os05g47650	661.044	393.5	928.589	1.2373	2.38221e-61	4.24162e-60	up
LOC_Os02g54130	742.787	463.913	1021.66	1.13953	3.53962e-61	6.2876e-60	up
LOC_Os08g42080	515.5	745.211	285.788	-1.38287	4.33027e-61	7.6804e-60	down
LOC_Os11g10710	211.258	70.8073	351.709	2.31016	4.79339e-61	8.49536e-60	up
LOC_Os05g34030	174.302	300.633	47.9717	-2.64481	7.41456e-61	1.3111e-59	down
LOC_Os01g61610	138.188	15.4869	260.89	4.09	1.17651e-60	2.07568e-59	up
LOC_Os02g51970	291.905	456.111	127.699	-1.83634	1.28607e-60	2.26556e-59	down
LOC_Os03g25370	343.967	522.771	165.162	-1.66316	1.44931e-60	2.5512e-59	down
LOC_Os04g46530	363.479	546.344	180.615	-1.5977	1.51725e-60	2.66878e-59	down
LOC_Os01g01740	1064.65	1420.18	709.121	-1.00215	1.7306e-60	3.04177e-59	down
LOC_Os09g32100	484.918	266.655	703.181	1.39785	2.013e-60	3.53016e-59	up
LOC_Os04g10434	673.364	930.271	416.456	-1.1592	3.1545e-60	5.51955e-59	down
LOC_Os04g04800	141.602	274.688	8.5162	-5.02026	3.22843e-60	5.64467e-59	down
LOC_Os08g32880	904.719	1230.19	579.249	-1.08836	3.2995e-60	5.76462e-59	down
LOC_Os10g04800	138.474	252.435	24.5131	-3.35525	3.57844e-60	6.24729e-59	down
LOC_Os02g51930	173.84	47.3598	300.319	2.67625	3.63122e-60	6.3347e-59	up
LOC_Os12g04360	672.538	932.185	412.891	-1.17519	5.38443e-60	9.37919e-59	down
LOC_Os12g12580	140.007	252.778	27.2368	-3.21018	5.7124e-60	9.93566e-59	down
LOC_Os02g26800	495.021	276.998	713.044	1.36476	7.3948e-60	1.28523e-58	up
LOC_Os03g20500	598.321	840.606	356.035	-1.23782	7.47056e-60	1.29743e-58	down
LOC_Os03g11420	672.463	947.424	397.501	-1.25562	8.13245e-60	1.41134e-58	down
LOC_Os05g10620	484.209	261.549	706.869	1.433	8.25216e-60	1.43105e-58	up
LOC_Os09g37200	799.28	480.844	1117.72	1.21432	1.00822e-59	1.74581e-58	up
LOC_Os01g40280	996.855	658.471	1335.24	1.01848	1.28254e-59	2.21918e-58	up
LOC_Os04g44250	164.809	286.406	43.2115	-2.7282	1.56429e-59	2.70268e-58	down
LOC_Os04g46650	383.591	590.276	176.906	-1.74052	1.59772e-59	2.7584e-58	down
LOC_Os01g55150	353.044	532.099	173.989	-1.61458	1.7846e-59	3.07877e-58	down
LOC_Os03g16610	919.885	574.967	1264.8	1.13452	1.83826e-59	3.16901e-58	up
LOC_Os01g68650	138.709	24.2768	253.142	3.37347	2.34563e-59	4.03769e-58	up
LOC_Os12g36890	679.48	946.356	412.604	-1.19823	2.68494e-59	4.61497e-58	down
LOC_Os02g12760	865.503	568.446	1162.56	1.03368	2.91722e-59	5.01054e-58	up
LOC_Os01g10440	344.058	163.045	525.071	1.68489	3.52035e-59	6.03316e-58	up
LOC_Os01g09100	222.209	78.7723	365.646	2.21449	3.671e-59	6.28672e-58	up
LOC_Os02g46180	214.954	77.2806	352.628	2.18791	4.39355e-59	7.5131e-58	up
LOC_Os07g46700	872.033	562.078	1181.99	1.07483	5.7245e-59	9.7819e-58	up
LOC_Os09g38710	633.274	886.628	379.92	-1.22104	9.86598e-59	1.68465e-57	down
LOC_Os09g16920	850.369	1148.01	552.724	-1.05508	1.05204e-58	1.79376e-57	down
LOC_Os05g39250	135.861	10.3065	261.415	4.63573	1.28454e-58	2.187e-57	up
LOC_Os07g40860	650.883	400.123	901.644	1.17119	1.45931e-58	2.48273e-57	up
novel.436	545.432	2.27863	1088.59	8.83965	2.62964e-58	4.46085e-57	up
LOC_Os12g09640	198.722	65.8014	331.642	2.32693	2.64992e-58	4.49198e-57	up
LOC_Os06g30970	656.102	380.296	931.909	1.29234	2.71135e-58	4.59278e-57	up
LOC_Os02g51720	457.258	660.303	254.212	-1.37754	2.84742e-58	4.81628e-57	down
LOC_Os06g05420	131.011	16.8727	245.149	3.87739	2.87106e-58	4.85275e-57	up
LOC_Os05g32970	494.913	716.475	273.351	-1.38722	3.22367e-58	5.44087e-57	down
LOC_Os08g37874	608.162	362.063	854.262	1.23903	3.66209e-58	6.17637e-57	up
LOC_Os06g03540	630.874	877.995	383.753	-1.19526	4.79207e-58	8.04731e-57	down
LOC_Os02g49720	297.662	134.503	460.821	1.77963	5.77864e-58	9.69707e-57	up
LOC_Os03g52650	723.596	995.65	451.542	-1.14265	9.42546e-58	1.58054e-56	down
LOC_Os01g58194	142.841	27.8664	257.817	3.19641	9.83073e-58	1.64732e-56	up
LOC_Os01g47635	431.422	629.327	233.517	-1.43041	1.37073e-57	2.29033e-56	down
LOC_Os02g43290	803.077	1080.15	526.001	-1.03899	2.05702e-57	3.43214e-56	down
LOC_Os02g54640	669.949	931.002	408.896	-1.18719	2.11454e-57	3.5256e-56	down
LOC_Os12g19180	660.378	924.768	395.987	-1.22065	2.11987e-57	3.53196e-56	down
LOC_Os06g11200	255.773	3.77655	507.77	7.08663	2.48528e-57	4.13782e-56	up
LOC_Os11g11490	903.301	1209.31	597.296	-1.01877	2.85949e-57	4.75071e-56	down
LOC_Os10g35950	571.937	803.998	339.876	-1.24337	3.11686e-57	5.17461e-56	down
LOC_Os07g41650	159.303	39.9762	278.63	2.79705	3.31897e-57	5.50623e-56	up
LOC_Os12g37530	576.625	338.168	815.081	1.26707	4.78593e-57	7.92869e-56	up
LOC_Os08g02230	1031.14	666.637	1395.65	1.06327	6.12239e-57	1.01212e-55	up
LOC_Os11g13720	258.71	408.462	108.959	-1.90929	6.17836e-57	1.02065e-55	down
LOC_Os04g42760	277.934	438.846	117.023	-1.90517	8.65799e-57	1.42725e-55	down
LOC_Os05g43240	681.537	424.759	938.314	1.14559	1.27386e-56	2.09697e-55	up
LOC_Os02g04130	304.919	142.463	467.375	1.71287	1.689e-56	2.77841e-55	up
LOC_Os03g20330	146.765	29.9076	263.622	3.12601	1.86533e-56	3.06631e-55	up
LOC_Os10g08319	351.014	173.243	528.785	1.61264	2.46741e-56	4.04749e-55	up
LOC_Os03g61470	1071.35	1436.08	706.611	-1.02315	2.47335e-56	4.05439e-55	down
LOC_Os08g38910	203.044	71.3937	334.694	2.22915	4.03876e-56	6.6158e-55	up
LOC_Os06g12320	268.962	425.973	111.952	-1.92935	4.85214e-56	7.93706e-55	down
LOC_Os10g28340	567.928	339.547	796.309	1.2296	6.95444e-56	1.1368e-54	up
LOC_Os01g50420	158.508	43.1471	273.869	2.66723	7.91799e-56	1.2925e-54	up
LOC_Os03g06040	385.481	571.817	199.144	-1.52143	8.49857e-56	1.3863e-54	down
LOC_Os11g47680	356.521	181.284	531.758	1.5537	8.86506e-56	1.44507e-54	up
LOC_Os02g56600	871.996	1167.67	576.316	-1.01918	9.97732e-56	1.62525e-54	down
LOC_Os03g13520	590.509	828.36	352.659	-1.23252	1.04008e-55	1.69187e-54	down
LOC_Os07g35380	224.533	81.593	367.473	2.17474	1.60394e-55	2.60365e-54	up
LOC_Os02g25780	607.51	357.126	857.894	1.26384	1.76167e-55	2.8577e-54	up
LOC_Os12g40260	121.719	14.5635	228.874	3.97087	1.96322e-55	3.17803e-54	up
LOC_Os01g31360	593.454	351.955	834.952	1.24786	2.09175e-55	3.38374e-54	up
LOC_Os01g60340	282.072	437.258	126.886	-1.7877	4.37282e-55	7.03961e-54	down
LOC_Os01g34010	121.349	15.1816	227.517	3.8968	4.50664e-55	7.25005e-54	up
LOC_Os03g36650	167.87	285.499	50.2422	-2.50802	6.11117e-55	9.82455e-54	down
LOC_Os01g57854	847.4	552.113	1142.69	1.04771	7.02469e-55	1.12854e-53	up
LOC_Os03g51150	745.767	1009.45	482.082	-1.06666	7.38417e-55	1.18466e-53	down
LOC_Os03g07510	153.435	266.067	40.8035	-2.69918	7.70081e-55	1.23461e-53	down
LOC_Os08g28570	835.913	1117.24	554.586	-1.01178	8.77298e-55	1.40554e-53	down
LOC_Os06g47130	196.373	67.7473	324.999	2.26984	1.13131e-54	1.81126e-53	up
LOC_Os10g27980	176.102	295.437	56.7669	-2.37561	1.18349e-54	1.89221e-53	down
LOC_Os11g36150	658.907	908.373	409.442	-1.15074	1.27444e-54	2.03623e-53	down
LOC_Os12g06660	161.305	277.765	44.8461	-2.63633	1.41139e-54	2.25349e-53	down
LOC_Os03g02939	506.065	716.673	295.456	-1.27903	1.80429e-54	2.87689e-53	down
LOC_Os06g06080	609.067	368.069	850.066	1.20572	2.18644e-54	3.48146e-53	up
LOC_Os10g30770	120.614	222.484	18.7447	-3.56111	2.42827e-54	3.85863e-53	down
LOC_Os04g44300	584.888	356.714	813.063	1.18721	2.43335e-54	3.86408e-53	up
LOC_Os04g33590	692.961	435.85	950.072	1.12178	2.81289e-54	4.46375e-53	up
LOC_Os01g04920	502.933	718.031	287.836	-1.32201	3.33764e-54	5.29286e-53	down
LOC_Os01g52750	255.047	401.466	108.628	-1.8869	3.52593e-54	5.57632e-53	down
LOC_Os01g11730	334.015	665.419	2.61194	-7.9971	4.32388e-54	6.82443e-53	down
LOC_Os01g11790	126.85	228.719	24.981	-3.19042	5.11505e-54	8.06768e-53	down
LOC_Os05g46020	322.192	157.612	486.772	1.62855	6.72174e-54	1.05733e-52	up
LOC_Os06g06560	214.127	81.1133	347.141	2.09774	7.45804e-54	1.17078e-52	up
LOC_Os02g36210	169.663	47.1554	292.171	2.62296	7.61911e-54	1.19526e-52	up
LOC_Os03g15460	787.14	511.842	1062.44	1.05275	8.39858e-54	1.31666e-52	up
LOC_Os01g03890	754.827	1029.81	479.843	-1.10278	8.53835e-54	1.33678e-52	down
LOC_Os01g12110	272.73	117.4	428.06	1.86565	9.24375e-54	1.44625e-52	up
LOC_Os10g37290	364.816	190.286	539.347	1.50221	1.07706e-53	1.68401e-52	up
LOC_Os02g48200	355.732	533.512	177.951	-1.58596	1.09007e-53	1.7032e-52	down
LOC_Os01g32780	645.019	402.55	887.487	1.14	1.12888e-53	1.76266e-52	up
LOC_Os10g17260	732.566	999.383	465.749	-1.10271	1.23712e-53	1.9291e-52	down
LOC_Os09g11620	137.53	6.92875	268.132	5.30123	1.29671e-53	2.02067e-52	up
LOC_Os02g34990	388.893	571.756	206.03	-1.4705	1.50863e-53	2.34466e-52	down
LOC_Os06g03670	124.326	8.93886	239.713	4.76095	1.62601e-53	2.5254e-52	up
LOC_Os06g40818	440.86	634.111	247.608	-1.35821	2.68521e-53	4.1594e-52	down
LOC_Os09g12420	624.457	865.509	383.405	-1.1773	3.69532e-53	5.7127e-52	down
LOC_Os10g31180	129.003	231.953	26.0522	-3.15486	4.93453e-53	7.6083e-52	down
LOC_Os07g41320	721.053	455.579	986.527	1.1141	9.50839e-53	1.46412e-51	up
LOC_Os01g73170	332.205	496.531	167.878	-1.56396	1.09415e-52	1.68257e-51	down
LOC_Os06g35540	595.406	364.824	825.988	1.17644	2.66343e-52	4.06901e-51	up
LOC_Os01g08150	698.292	956.166	440.418	-1.11823	3.24254e-52	4.94726e-51	down
LOC_Os02g52490	592.654	837.112	348.196	-1.26537	3.25717e-52	4.96633e-51	down
LOC_Os06g09270	456.018	649.267	262.769	-1.30482	3.80697e-52	5.79707e-51	down
LOC_Os08g31280	149.77	5.36229	294.178	5.7601	6.21764e-52	9.42491e-51	up
LOC_Os04g49370	580.402	360.683	800.121	1.14959	7.68272e-52	1.16231e-50	up
LOC_Os09g19140	125.534	244.19	6.87924	-5.16018	8.61919e-52	1.30314e-50	down
LOC_Os05g33840	363.956	189.498	538.413	1.50775	8.79643e-52	1.32908e-50	up
LOC_Os03g24100	137.465	6.01155	268.919	5.46092	1.03699e-51	1.5648e-50	up
LOC_Os01g08780	715.904	462.571	969.236	1.06636	1.05242e-51	1.58705e-50	up
LOC_Os06g44010	153.815	44.8955	262.735	2.54246	1.27417e-51	1.92021e-50	up
LOC_Os06g16160	510.185	722.974	297.396	-1.28296	1.29975e-51	1.9575e-50	down
LOC_Os01g58310	114.837	13.9204	215.753	3.95281	1.30751e-51	1.96792e-50	up
LOC_Os10g38640	161.346	272.915	49.777	-2.45402	3.6363e-51	5.4624e-50	down
LOC_Os01g52610	450.383	662.481	238.286	-1.4704	3.9082e-51	5.86707e-50	down
LOC_Os04g54620	283.306	432.232	134.38	-1.68499	5.80133e-51	8.6979e-50	down
LOC_Os01g09580	580.897	804.084	357.709	-1.1698	8.12826e-51	1.21554e-49	down
LOC_Os03g62010	625.807	858.884	392.73	-1.12995	8.89942e-51	1.33002e-49	down
LOC_Os11g45740	623.704	382.22	865.188	1.17881	1.43623e-50	2.14233e-49	up
LOC_Os12g36210	170.581	56.8058	284.357	2.31828	1.45766e-50	2.17152e-49	up
LOC_Os02g14170	728.398	982.325	474.471	-1.05111	1.54453e-50	2.29947e-49	down
LOC_Os01g70730	162.105	276.36	47.8505	-2.52903	2.35704e-50	3.49798e-49	down
LOC_Os03g18300	294.69	140.521	448.859	1.67658	2.43658e-50	3.61142e-49	up
LOC_Os12g43580	525.217	312.287	738.147	1.23948	2.63053e-50	3.89642e-49	up
LOC_Os02g09240	132.749	30.9053	234.593	2.93744	2.81782e-50	4.17119e-49	up
LOC_Os01g50910	114.52	8.69583	220.344	4.6426	3.20904e-50	4.74131e-49	up
LOC_Os07g07450	303.534	458.189	148.878	-1.62497	3.22131e-50	4.75641e-49	down
LOC_Os01g15320	924.803	1240.41	609.195	-1.02731	3.71889e-50	5.48765e-49	down
LOC_Os05g06140	114.136	207.085	21.1872	-3.29236	4.27311e-50	6.28561e-49	down
LOC_Os09g35030	111.394	11.0673	211.721	4.28085	4.81997e-50	7.08111e-49	up
novel.403	270.687	127.044	414.329	1.70583	5.31584e-50	7.8047e-49	up
LOC_Os01g64000	111.047	15.1629	206.931	3.76134	5.65157e-50	8.2924e-49	up
LOC_Os10g33650	582.241	817.17	347.312	-1.23243	6.94287e-50	1.01743e-48	down
LOC_Os04g27980	209.412	3.33353	415.49	6.93455	7.6399e-50	1.11817e-48	up
LOC_Os03g55660	130.345	5.87448	254.816	5.38411	7.71861e-50	1.12899e-48	up
LOC_Os03g22200	160.97	51.4623	270.477	2.39096	8.0684e-50	1.17941e-48	up
LOC_Os07g18990	478.045	266.841	689.249	1.3706	8.91849e-50	1.30286e-48	up
LOC_Os11g28940	118.755	213.319	24.19	-3.14537	9.14259e-50	1.33476e-48	down
LOC_Os03g06630	148.002	40.1128	255.892	2.68451	9.28932e-50	1.35534e-48	up
LOC_Os05g04610	394.215	568.546	219.883	-1.36979	1.0735e-49	1.56529e-48	down
LOC_Os08g14990	237.783	374.327	101.239	-1.88627	1.30609e-49	1.90325e-48	down
LOC_Os02g14430	161.223	273.009	49.4375	-2.45839	1.34115e-49	1.95312e-48	down
LOC_Os01g70970	204.405	332.006	76.8027	-2.11313	2.08555e-49	3.02962e-48	down
LOC_Os04g28420	231.4	3.28308	459.518	7.23063	2.28018e-49	3.3103e-48	up
LOC_Os01g24600	105.334	198.844	11.8241	-4.08449	2.45863e-49	3.56715e-48	down
LOC_Os08g35490	104.882	195.785	13.9788	-3.80674	3.41675e-49	4.95419e-48	down
LOC_Os06g38750	661.813	893.628	429.999	-1.05496	3.53586e-49	5.12371e-48	down
LOC_Os04g05070	398.657	573.922	223.393	-1.36346	3.85186e-49	5.5747e-48	down
LOC_Os08g36310	291.309	439.734	142.884	-1.62113	4.67348e-49	6.75544e-48	down
LOC_Os11g39990	577.394	792.919	361.868	-1.13322	5.19272e-49	7.50134e-48	down
LOC_Os02g54570	765.411	1035.78	495.043	-1.06632	5.30629e-49	7.65594e-48	down
LOC_Os01g52160	450.947	646.538	255.356	-1.33849	7.53037e-49	1.08247e-47	down
LOC_Os12g12080	111.518	18.0721	204.965	3.48476	9.39665e-49	1.34909e-47	up
LOC_Os10g34920	111.059	15.4184	206.7	3.75752	1.07747e-48	1.54599e-47	up
LOC_Os05g51390	138.449	37.7293	239.169	2.65571	1.11348e-48	1.59667e-47	up
LOC_Os07g48870	248.457	112.275	384.64	1.77764	1.23997e-48	1.77696e-47	up
LOC_Os01g14880	295.904	144.309	447.498	1.63946	1.46633e-48	2.10006e-47	up
LOC_Os06g05410	122.064	24.8002	219.327	3.16012	1.63767e-48	2.34402e-47	up
LOC_Os03g06730	437.729	628.795	246.664	-1.34963	1.8411e-48	2.63357e-47	down
LOC_Os01g61690	553.455	766.319	340.59	-1.17076	2.15129e-48	3.07352e-47	down
LOC_Os03g59240	658.112	899.607	416.617	-1.11119	2.59246e-48	3.69703e-47	down
LOC_Os07g02800	573.807	359.142	788.472	1.13363	3.5379e-48	5.03914e-47	up
LOC_Os10g30330	423.098	604.788	241.408	-1.32688	5.1409e-48	7.30452e-47	down
LOC_Os03g48560	258.195	397.754	118.636	-1.74273	6.28079e-48	8.9133e-47	down
novel.628	122.461	28.0091	216.914	2.96061	6.49066e-48	9.20555e-47	up
LOC_Os04g31410	215.643	344.925	86.3607	-1.99843	6.78374e-48	9.61537e-47	down
LOC_Os05g35500	406.731	580.659	232.803	-1.31889	7.12952e-48	1.00932e-46	down
LOC_Os01g71820	172.411	60.7687	284.053	2.23116	7.45279e-48	1.05445e-46	up
LOC_Os05g03640	197.697	78.4601	316.934	2.01358	9.20762e-48	1.30194e-46	up
LOC_Os07g06470	462.382	651.612	273.153	-1.25493	1.03575e-47	1.46277e-46	down
LOC_Os08g39270	498.922	691.802	306.042	-1.17646	1.1615e-47	1.63738e-46	down
LOC_Os07g48560	184.326	64.597	304.056	2.22663	1.18475e-47	1.66916e-46	up
LOC_Os03g40670	520.618	721.186	320.051	-1.17071	1.37988e-47	1.9429e-46	down
LOC_Os06g01590	168.62	55.0587	282.182	2.34621	1.61136e-47	2.26472e-46	up
LOC_Os06g50480	712.669	971.32	454.018	-1.09695	1.66822e-47	2.34323e-46	down
LOC_Os04g57330	510.694	709.516	311.872	-1.18481	1.92041e-47	2.69585e-46	down
LOC_Os07g35750	436.766	621.515	252.017	-1.30144	1.98435e-47	2.78226e-46	down
LOC_Os01g07250	636.133	864.431	407.836	-1.08294	2.34238e-47	3.28032e-46	down
LOC_Os02g01210	199.535	78.5898	320.48	2.03853	2.44419e-47	3.4188e-46	up
LOC_Os06g12790	552.139	342.086	762.192	1.15615	2.50643e-47	3.50165e-46	up
LOC_Os09g25980	392.923	565.837	220.01	-1.36136	2.55001e-47	3.56041e-46	down
LOC_Os10g05570	258.021	395.998	120.044	-1.72326	2.72399e-47	3.80105e-46	down
LOC_Os04g15840	334.222	493.966	174.478	-1.50318	2.80343e-47	3.90723e-46	down
LOC_Os05g25920	165.456	58.2346	272.677	2.23059	5.23031e-47	7.26799e-46	up
LOC_Os02g57840	172.72	61.8922	283.547	2.20358	6.87946e-47	9.55395e-46	up
LOC_Os02g02640	705.337	951.21	459.465	-1.04954	7.48415e-47	1.03814e-45	down
LOC_Os03g15320	211.304	333.521	89.0863	-1.9059	8.17364e-47	1.13243e-45	down
LOC_Os08g33670	529.372	749.992	308.752	-1.27882	9.32223e-47	1.29004e-45	down
LOC_Os04g54230	145.821	45.3628	246.279	2.44466	1.06082e-46	1.46712e-45	up
LOC_Os02g37120	378.901	546.512	211.289	-1.36939	1.07841e-46	1.49056e-45	down
LOC_Os01g18530	102.216	12.235	192.196	3.97446	1.10478e-46	1.52611e-45	up
LOC_Os01g70540	328.941	172.832	485.049	1.48793	1.21193e-46	1.67314e-45	up
LOC_Os07g35680	185.046	69.3779	300.714	2.11212	1.30607e-46	1.80204e-45	up
LOC_Os07g43160	136.491	35.956	237.025	2.72021	1.33273e-46	1.83773e-45	up
LOC_Os11g06150	102.342	12.5596	192.125	3.93563	1.59899e-46	2.19582e-45	up
LOC_Os05g25540	243.95	379.071	108.829	-1.80044	2.05587e-46	2.81495e-45	down
LOC_Os06g01660	396.623	568.952	224.293	-1.34308	4.17218e-46	5.68599e-45	down
LOC_Os08g43334	119.448	25.2065	213.69	3.0852	4.85725e-46	6.61192e-45	up
LOC_Os01g70410	345.839	515.679	176	-1.55603	5.08647e-46	6.91991e-45	down
LOC_Os01g09430	622.149	398.87	845.428	1.08736	5.21377e-46	7.08897e-45	up
LOC_Os05g07120	137.665	4.45697	270.872	5.93825	5.6588e-46	7.68511e-45	up
LOC_Os02g50810	379.251	545.316	213.186	-1.35556	8.0483e-46	1.09112e-44	down
LOC_Os08g40680	101.324	12.5845	190.063	3.9176	8.7038e-46	1.17726e-44	up
LOC_Os05g09440	271.856	132.157	411.556	1.64029	1.21657e-45	1.64265e-44	up
LOC_Os12g26960	284.107	142.333	425.881	1.57732	1.88976e-45	2.53987e-44	up
LOC_Os01g12920	497.826	303.448	692.204	1.1882	2.88159e-45	3.86623e-44	up
LOC_Os07g44860	447.08	637.481	256.678	-1.3106	4.31731e-45	5.77926e-44	down
LOC_Os05g12481	505.796	309.884	701.707	1.17661	4.6034e-45	6.15869e-44	up
LOC_Os04g58090	270.464	134.335	406.594	1.60106	4.76146e-45	6.36651e-44	up
LOC_Os03g32230	119.303	27.6352	210.97	2.92256	5.03705e-45	6.73114e-44	up
LOC_Os11g30910	95.8869	180.423	11.3506	-3.98725	5.11745e-45	6.83468e-44	down
LOC_Os08g08960	155.245	52.6972	257.792	2.29864	7.48806e-45	9.97796e-44	up
LOC_Os08g43620	107.372	6.93501	207.808	4.93451	1.05952e-44	1.40541e-43	up
LOC_Os10g01134	194.301	73.716	314.887	2.09431	1.32497e-44	1.75653e-43	up
LOC_Os10g39640	126.242	33.708	218.776	2.71273	1.49938e-44	1.98437e-43	up
LOC_Os08g10250	304.932	456.548	153.317	-1.5737	1.51197e-44	1.99989e-43	down
novel.940	138.832	3.99524	273.669	6.06958	1.57904e-44	2.08624e-43	up
LOC_Os03g52380	147.636	47.2738	247.998	2.38366	1.84307e-44	2.43233e-43	up
LOC_Os06g49390	227.439	351.459	103.42	-1.76623	2.01604e-44	2.6546e-43	down
LOC_Os09g37620	390.735	559.993	221.478	-1.33561	2.07499e-44	2.73069e-43	down
LOC_Os08g17160	396.008	563.106	228.911	-1.3004	2.33276e-44	3.06819e-43	down
LOC_Os05g37060	251.407	2.39704	500.417	7.71774	2.42151e-44	3.18313e-43	up
LOC_Os09g32470	478.086	291.648	664.523	1.18907	2.59981e-44	3.41557e-43	up
LOC_Os08g31890	131.754	225.943	37.5643	-2.58488	4.96526e-44	6.51227e-43	down
LOC_Os04g34010	103.757	19.8697	187.645	3.22935	5.04151e-44	6.60856e-43	up
LOC_Os11g26790	1585.41	0.967657	3169.86	11.6031	5.55237e-44	7.26598e-43	up
LOC_Os03g57640	125.03	34.1397	215.921	2.65581	5.73412e-44	7.49962e-43	up
LOC_Os06g10210	368.847	205.749	531.946	1.3693	5.95613e-44	7.78563e-43	up
LOC_Os08g31860	129.9	37.2733	222.528	2.5746	6.21874e-44	8.12436e-43	up
LOC_Os03g20210	294.844	434.691	154.996	-1.48779	8.36021e-44	1.08734e-42	down
novel.594	105.336	6.44837	204.224	4.98298	8.46302e-44	1.1001e-42	up
LOC_Os03g52860	659.063	433.702	884.424	1.02558	1.02367e-43	1.32918e-42	up
novel.388	118.314	29.5632	207.065	2.82228	1.04826e-43	1.36035e-42	up
LOC_Os05g43830	618.175	401.207	835.143	1.05873	1.14199e-43	1.47952e-42	up
LOC_Os06g01860	380.221	547.956	212.486	-1.36765	1.29615e-43	1.67645e-42	down
LOC_Os11g47500	246.851	114.511	379.191	1.72188	1.30076e-43	1.68149e-42	up
LOC_Os09g28600	459.781	279.093	640.469	1.2025	1.66562e-43	2.15076e-42	up
LOC_Os03g59320	100.818	18.2964	183.339	3.3215	1.91161e-43	2.46432e-42	up
LOC_Os09g32290	239.744	368.755	110.732	-1.73712	2.02824e-43	2.61178e-42	down
LOC_Os04g42720	394.232	229.037	559.428	1.29119	2.30429e-43	2.96235e-42	up
LOC_Os08g34580	209.303	92.0939	326.513	1.82365	2.43644e-43	3.1288e-42	up
LOC_Os06g05910	238.696	114.447	362.946	1.66801	2.54111e-43	3.26141e-42	up
LOC_Os03g16030	422.931	1.78515	844.077	8.95653	2.56534e-43	3.29071e-42	up
LOC_Os11g37970	143.461	45.756	241.166	2.40276	2.63654e-43	3.38019e-42	up
LOC_Os04g35790	427.082	596.389	257.776	-1.20982	2.91424e-43	3.73007e-42	down
LOC_Os02g34580	175.006	280.81	69.2021	-2.01765	2.97453e-43	3.80307e-42	down
LOC_Os01g11350	311.936	465.95	157.923	-1.56298	3.6626e-43	4.67256e-42	down
LOC_Os01g45640	210.851	90.7388	330.963	1.86648	4.1795e-43	5.32328e-42	up
LOC_Os03g02400	571.959	773.272	370.646	-1.06282	4.25123e-43	5.41168e-42	down
LOC_Os01g02930	381.646	215.036	548.257	1.35285	4.43395e-43	5.64121e-42	up
LOC_Os02g57620	580.247	782.322	378.171	-1.04963	5.93368e-43	7.52061e-42	down
LOC_Os07g35310	277.247	140.341	414.153	1.55996	6.08276e-43	7.69703e-42	up
LOC_Os03g13160	159.456	59.4397	259.472	2.12644	6.62763e-43	8.38196e-42	up
LOC_Os10g37340	255.062	124.898	385.226	1.61968	8.35857e-43	1.05596e-41	up
LOC_Os10g37770	639.73	861.466	417.994	-1.04577	8.38251e-43	1.05842e-41	down
LOC_Os09g20000	176.71	69.4284	283.991	2.02458	8.3871e-43	1.05842e-41	up
LOC_Os10g20260	265.213	397.297	133.128	-1.57981	8.93622e-43	1.12711e-41	down
LOC_Os10g28320	448.729	626.813	270.645	-1.21364	9.08173e-43	1.14485e-41	down
LOC_Os01g63980	93.4091	10.8804	175.938	4.017	9.23524e-43	1.16357e-41	up
LOC_Os09g12660	459.199	273.229	645.168	1.23756	1.13376e-42	1.42538e-41	up
LOC_Os08g15050	291.81	150.539	433.081	1.52851	1.17644e-42	1.47824e-41	up
LOC_Os12g35610	590.408	381.58	799.235	1.06832	1.3782e-42	1.7299e-41	up
LOC_Os10g05690	420.631	589.989	251.274	-1.22938	1.4839e-42	1.86058e-41	down
LOC_Os05g02140	405.128	239.055	571.201	1.25959	1.86161e-42	2.3304e-41	up
LOC_Os01g52180	150.956	249.992	51.9194	-2.27003	1.89447e-42	2.37026e-41	down
LOC_Os09g36740	570.036	781.465	358.607	-1.12734	2.03781e-42	2.54824e-41	down
LOC_Os02g12010	161.059	60.9625	261.155	2.1013	2.60594e-42	3.25346e-41	up
LOC_Os05g31620	172.112	66.0195	278.205	2.0709	2.84622e-42	3.54964e-41	up
LOC_Os05g47730	118.563	4.51305	232.613	5.71812	2.85186e-42	3.55478e-41	up
LOC_Os04g05010	326.757	179.736	473.778	1.3993	3.11748e-42	3.88172e-41	up
LOC_Os03g20090	305.283	161.059	449.507	1.4783	3.34075e-42	4.15309e-41	up
LOC_Os03g03630	402.135	584.262	220.008	-1.40676	3.55655e-42	4.41902e-41	down
LOC_Os04g51520	138.114	230.518	45.7093	-2.33904	3.60582e-42	4.47784e-41	down
LOC_Os12g02400	131.669	41.2623	222.076	2.42317	3.83742e-42	4.75534e-41	up
LOC_Os06g30500	601.391	809.756	393.026	-1.04318	5.7227e-42	7.07657e-41	down
LOC_Os01g17396	93.6487	7.89021	179.407	4.52083	6.15153e-42	7.59078e-41	up
LOC_Os06g04850	318.794	467.694	169.894	-1.46343	6.30007e-42	7.76997e-41	down
LOC_Os06g28800	94.5476	7.49081	181.604	4.60365	8.17748e-42	1.00589e-40	up
LOC_Os07g12800	598.862	393.386	804.338	1.03347	8.81732e-42	1.08345e-40	up
LOC_Os03g04070	330.226	181.652	478.8	1.39934	9.18096e-42	1.12754e-40	up
LOC_Os01g59580	280.247	415.162	145.332	-1.51689	1.12821e-41	1.3834e-40	down
LOC_Os01g10210	228.635	108.854	348.415	1.6765	1.17282e-41	1.43736e-40	up
LOC_Os06g43020	170.505	68.6658	272.344	1.98857	1.21541e-41	1.48876e-40	up
LOC_Os07g19320	158.037	255.438	60.6368	-2.07754	1.28367e-41	1.57073e-40	down
LOC_Os04g12970	101.171	5.68695	196.656	5.09248	1.3885e-41	1.69634e-40	up
LOC_Os06g11290	595.766	391.92	799.611	1.02867	1.46639e-41	1.78869e-40	up
LOC_Os09g37240	482.322	297.35	667.294	1.1637	1.53237e-41	1.86819e-40	up
LOC_Os09g29239	267.257	134.043	400.472	1.57479	1.6535e-41	2.01377e-40	up
LOC_Os05g04830	102.007	19.6012	184.413	3.22825	1.68981e-41	2.05692e-40	up
LOC_Os02g32060	363.517	515.698	211.336	-1.28695	1.877e-41	2.2824e-40	down
LOC_Os03g41110	622.824	403.98	841.669	1.05814	1.93158e-41	2.34754e-40	up
LOC_Os09g28500	116.375	201.505	31.2442	-2.69263	2.11447e-41	2.56715e-40	down
LOC_Os10g39380	137.849	231.485	44.2138	-2.3948	2.17511e-41	2.6394e-40	down
LOC_Os02g22680	352.436	501.81	203.061	-1.30571	2.62705e-41	3.1845e-40	down
LOC_Os02g58720	185.824	293.354	78.2952	-1.90909	2.81376e-41	3.40728e-40	down
LOC_Os12g24490	294.332	430.615	158.049	-1.44497	3.21006e-41	3.88517e-40	down
LOC_Os09g16110	219.407	345.686	93.1293	-1.89461	3.35225e-41	4.05517e-40	down
LOC_Os07g41350	160.745	61.3931	260.097	2.08817	3.38364e-41	4.09102e-40	up
LOC_Os10g37190	454.057	626.191	281.924	-1.1519	4.12052e-41	4.97423e-40	down
LOC_Os08g36920	571.137	1.35459	1140.92	9.71386	4.99919e-41	6.02249e-40	up
LOC_Os01g44050	467.741	290.694	644.789	1.14844	5.44168e-41	6.55217e-40	up
LOC_Os07g42220	382.827	225.069	540.585	1.26253	6.02204e-41	7.23605e-40	up
LOC_Os08g42490	121.142	34.8008	207.483	2.5802	7.06196e-41	8.47689e-40	up
LOC_Os11g04830	367.368	533.758	200.978	-1.40869	7.24675e-41	8.69424e-40	down
LOC_Os07g49240	541.073	732.543	349.602	-1.06504	7.59049e-41	9.09263e-40	down
LOC_Os06g29844	197.876	86.1434	309.608	1.85298	9.29114e-41	1.11127e-39	up
LOC_Os02g56750	484.917	306.158	663.677	1.11359	9.78925e-41	1.17025e-39	up
LOC_Os11g42430	278.741	409.892	147.591	-1.47505	1.04772e-40	1.25122e-39	down
LOC_Os02g49840	202.311	88.842	315.78	1.82414	1.11722e-40	1.33353e-39	up
LOC_Os07g33270	433.028	264.059	601.996	1.1872	1.18748e-40	1.41667e-39	up
LOC_Os12g04500	534.199	346.708	721.691	1.05609	1.19956e-40	1.43035e-39	up
LOC_Os02g15930	96.9232	18.3842	175.462	3.23613	1.20453e-40	1.43554e-39	up
LOC_Os04g37619	504.432	320.652	688.213	1.10065	1.3122e-40	1.56227e-39	up
LOC_Os05g35570	517.552	701.951	333.153	-1.07531	1.35984e-40	1.61816e-39	down
LOC_Os07g23430	99.425	17.3792	181.471	3.36725	1.50373e-40	1.78848e-39	up
LOC_Os03g12470	650.969	868.764	433.173	-1.00651	1.57109e-40	1.86669e-39	down
LOC_Os04g48030	669.96	434.51	905.411	1.05606	1.67913e-40	1.99405e-39	up
LOC_Os02g07930	502.419	321.349	683.489	1.09067	1.68085e-40	1.99507e-39	up
LOC_Os06g49640	155.607	56.7865	254.428	2.16352	1.97351e-40	2.34007e-39	up
LOC_Os11g20090	123.376	34.5198	212.232	2.62657	2.08783e-40	2.4731e-39	up
LOC_Os03g23960	537.668	731.569	343.766	-1.09242	2.14756e-40	2.54257e-39	down
LOC_Os11g11970	277.812	408.812	146.813	-1.48014	2.34279e-40	2.76949e-39	down
LOC_Os03g61160	87.4134	9.58811	165.239	4.1179	2.38426e-40	2.81567e-39	up
LOC_Os01g70590	353.691	201.517	505.865	1.32515	2.38665e-40	2.81707e-39	up
LOC_Os06g35630	359.072	510.906	207.237	-1.30112	2.53598e-40	2.9903e-39	down
LOC_Os04g49980	164.746	65.6693	263.823	2.00883	2.88543e-40	3.40065e-39	up
LOC_Os05g01380	134.28	44.9261	223.633	2.31826	3.93276e-40	4.63031e-39	up
LOC_Os09g26310	580.917	784.061	377.772	-1.05306	4.92118e-40	5.77657e-39	down
LOC_Os10g02100	94.5808	169.948	19.2132	-3.14682	5.34256e-40	6.26491e-39	down
LOC_Os04g01740	109.229	4.29493	214.163	5.60224	5.78399e-40	6.77235e-39	up
LOC_Os05g44300	126.055	40.4379	211.672	2.38895	5.84621e-40	6.84176e-39	up
LOC_Os06g11150	295.132	160.361	429.903	1.419	6.60595e-40	7.72314e-39	up
LOC_Os04g26960	84.5296	160.709	8.35066	-4.24873	7.44195e-40	8.69182e-39	down
LOC_Os12g31200	208.657	324.647	92.6659	-1.81556	8.55347e-40	9.98005e-39	down
LOC_Os11g46880	524.574	337.707	711.44	1.07288	9.24318e-40	1.07794e-38	up
LOC_Os10g40040	142.728	3.01513	282.442	6.52973	9.79134e-40	1.1413e-38	up
LOC_Os06g12230	280.743	412.547	148.94	-1.47142	1.18561e-39	1.37921e-38	down
LOC_Os01g43650	146.353	53.0667	239.639	2.17102	1.18918e-39	1.38268e-38	up
LOC_Os02g22020	109.562	29.1637	189.961	2.71576	1.24319e-39	1.4444e-38	up
LOC_Os03g47530	99.1527	22.3222	175.983	2.99193	1.2435e-39	1.4444e-38	up
LOC_Os05g50730	191.575	85.2387	297.911	1.80979	1.25354e-39	1.45535e-38	up
LOC_Os03g58290	128.634	3.43324	253.834	6.22268	1.4358e-39	1.66446e-38	up
LOC_Os11g15250	88.5069	164.594	12.4196	-3.7369	1.56859e-39	1.81569e-38	down
LOC_Os08g08990	97.9788	15.9617	179.996	3.493	1.8358e-39	2.12079e-38	up
LOC_Os09g03190	92.5853	16.7418	168.429	3.33716	2.04387e-39	2.35883e-38	up
LOC_Os04g11820	634.093	419.988	848.198	1.01156	2.04892e-39	2.36349e-38	up
LOC_Os03g30530	466.335	648.371	284.299	-1.187	2.39226e-39	2.75682e-38	down
LOC_Os12g03594	568.056	762.99	373.122	-1.03277	2.49763e-39	2.87542e-38	down
LOC_Os03g15270	435.427	263.384	607.47	1.20488	2.51461e-39	2.89354e-38	up
LOC_Os06g44160	190.701	80.4024	301	1.89949	2.54242e-39	2.9241e-38	up
LOC_Os01g14700	121.648	205.796	37.499	-2.45633	2.60261e-39	2.99038e-38	down
LOC_Os01g43740	314.804	1.68545	627.923	8.53012	2.65538e-39	3.04951e-38	up
LOC_Os02g10490	586.37	790.845	381.896	-1.04866	3.09965e-39	3.55448e-38	down
LOC_Os01g56660	123.712	208.126	39.2975	-2.40345	3.36108e-39	3.84671e-38	down
LOC_Os07g35340	412.08	238.112	586.048	1.29364	4.72814e-39	5.39544e-38	up
LOC_Os01g38180	240.476	360.15	120.802	-1.57504	5.01348e-39	5.7099e-38	down
LOC_Os10g35580	510.807	695.481	326.134	-1.09527	5.70047e-39	6.47967e-38	down
LOC_Os11g26750	138.385	3.0463	273.724	6.48466	6.63228e-39	7.5242e-38	up
LOC_Os02g08490	433.041	262.288	603.795	1.19862	7.04767e-39	7.97995e-38	up
LOC_Os01g36560	105.1	27.3163	182.884	2.7491	7.23052e-39	8.18303e-38	up
LOC_Os04g50770	563.689	752.137	375.24	-1.00461	8.27593e-39	9.35256e-38	down
LOC_Os05g15170	579.147	787.521	370.774	-1.09037	9.57882e-39	1.08076e-37	down
LOC_Os08g28880	127.433	41.0691	213.798	2.36979	9.74621e-39	1.09875e-37	up
LOC_Os05g03960	153.368	57.7978	248.939	2.10632	1.19466e-38	1.34487e-37	up
LOC_Os02g30714	136.918	49.1088	224.726	2.19137	1.21195e-38	1.36368e-37	up
LOC_Os10g05560	139.829	231.056	48.6024	-2.25362	1.24314e-38	1.39743e-37	down
LOC_Os08g39300	249.828	122.969	376.686	1.60934	1.43757e-38	1.61288e-37	up
novel.116	461.703	1.34214	922.063	9.40702	1.52404e-38	1.70908e-37	up
LOC_Os05g45020	264.371	140.884	387.858	1.46051	1.54218e-38	1.72857e-37	up
novel.704	102.542	25.5996	179.484	2.81553	1.80247e-38	2.0155e-37	up
LOC_Os01g61900	406.309	565.129	247.488	-1.19259	1.83728e-38	2.05344e-37	down
LOC_Os10g31680	16106.2	22354.9	9857.54	-1.18131	3.0001e-38	3.3403e-37	down
LOC_Os10g25290	297.181	165.74	428.622	1.37285	3.06948e-38	3.41591e-37	up
LOC_Os12g43363	385.23	546.096	224.364	-1.28376	3.08703e-38	3.43381e-37	down
LOC_Os01g56010	305.882	168.857	442.908	1.38781	3.64663e-38	4.04856e-37	up
LOC_Os03g17730	317.429	178.099	456.759	1.36196	3.83879e-38	4.25785e-37	up
LOC_Os11g10590	85.5873	14.6071	156.567	3.42304	4.59119e-38	5.08755e-37	up
LOC_Os12g40330	126.916	41.8866	211.946	2.33231	4.74489e-38	5.25538e-37	up
LOC_Os09g32984	91.4791	163.937	19.0208	-3.09838	5.23512e-38	5.79285e-37	down
LOC_Os01g58130	128.057	42.2866	213.828	2.32542	6.14026e-38	6.78478e-37	up
LOC_Os10g38880	353.702	497.29	210.114	-1.2436	6.30371e-38	6.95881e-37	down
LOC_Os03g05570	603.454	805.096	401.813	-1.00534	8.64866e-38	9.52943e-37	down
LOC_Os03g11910	260.346	133.369	387.323	1.53382	9.84093e-38	1.08227e-36	up
LOC_Os06g43030	119.593	38.7711	200.415	2.37136	1.21975e-37	1.33954e-36	up
LOC_Os08g01100	621.402	837.539	405.266	-1.04536	1.29939e-37	1.42567e-36	down
LOC_Os01g56690	91.6607	5.07506	178.246	5.12838	1.41074e-37	1.54566e-36	up
LOC_Os01g54450	277.123	151.122	403.124	1.41331	1.47553e-37	1.61437e-36	up
LOC_Os05g43140	322.967	461.889	184.045	-1.32893	1.61303e-37	1.76399e-36	down
LOC_Os11g24070	91.373	4.98781	177.758	5.12702	1.67926e-37	1.83555e-36	up
LOC_Os07g36570	470.529	302.25	638.808	1.07665	2.22059e-37	2.425e-36	up
novel.61	356.04	498.352	213.728	-1.22293	2.38467e-37	2.60175e-36	down
LOC_Os02g40900	166.351	66.369	266.333	1.99978	2.47944e-37	2.70389e-36	up
LOC_Os06g50950	140.713	2.78398	278.643	6.67982	2.48615e-37	2.70993e-36	up
LOC_Os10g39100	266.508	143.169	389.847	1.44366	2.48738e-37	2.71002e-36	up
LOC_Os03g51930	252.968	131.901	374.034	1.50198	2.56706e-37	2.79552e-36	up
LOC_Os02g40530	112.642	31.4243	193.859	2.62127	2.75177e-37	2.99528e-36	up
LOC_Os01g07150	264.672	387.19	142.154	-1.44745	2.77959e-37	3.02274e-36	down
LOC_Os02g46780	179.926	79.2471	280.605	1.8211	3.1092e-37	3.37647e-36	up
LOC_Os10g25230	81.355	10.6748	152.035	3.81013	3.41225e-37	3.70041e-36	up
LOC_Os11g08050	96.8175	22.635	171	2.91161	3.68153e-37	3.99057e-36	up
LOC_Os09g14700	200.062	88.6147	311.51	1.82256	3.99234e-37	4.32346e-36	up
LOC_Os09g25570	186.111	286.48	85.7419	-1.7385	4.38002e-37	4.7389e-36	down
LOC_Os05g03920	291.001	160.952	421.049	1.38818	4.88352e-37	5.28121e-36	up
novel.1047	293.928	163.754	424.101	1.37652	5.03749e-37	5.4452e-36	up
LOC_Os01g25740	405.519	560.649	250.389	-1.16207	5.26495e-37	5.6858e-36	down
LOC_Os10g11310	164.825	69.0023	260.648	1.92421	6.33434e-37	6.83436e-36	up
LOC_Os01g33080	393.472	543.339	243.605	-1.15652	6.50789e-37	7.01189e-36	down
LOC_Os03g56782	280.105	405.48	154.729	-1.39068	6.67904e-37	7.19298e-36	down
LOC_Os06g50100	227.091	115.776	338.406	1.54977	6.69699e-37	7.20898e-36	up
LOC_Os03g41438	82.5152	12.759	152.271	3.5948	8.3237e-37	8.93946e-36	up
LOC_Os07g48010	343.625	201.935	485.315	1.26301	8.49908e-37	9.12362e-36	up
LOC_Os05g04170	424.899	266.3	583.498	1.1287	8.73391e-37	9.3714e-36	up
LOC_Os03g53340	776.949	1.02374	1552.87	10.5739	9.1586e-37	9.82258e-36	up
LOC_Os10g36180	195.178	2.10355	388.253	7.57317	9.24153e-37	9.90698e-36	up
LOC_Os03g37840	144.882	51.5444	238.22	2.19457	1.15769e-36	1.23991e-35	up
LOC_Os02g14490	607.545	814.546	400.544	-1.02507	1.32742e-36	1.41844e-35	down
LOC_Os12g25660	98.1612	4.03887	192.284	5.56068	1.35712e-36	1.44952e-35	up
LOC_Os07g09610	351.785	209.874	493.695	1.23491	1.54049e-36	1.64312e-35	up
LOC_Os11g46900	134.008	219.777	48.2391	-2.19269	1.7472e-36	1.8619e-35	down
LOC_Os11g16970	242.871	361.02	124.723	-1.536	2.05513e-36	2.18606e-35	down
LOC_Os05g07600	269.744	391.682	147.806	-1.40609	2.07087e-36	2.2018e-35	down
LOC_Os02g12350	132.04	47.2664	216.813	2.20525	2.40564e-36	2.55657e-35	up
LOC_Os10g25400	88.3323	15.6377	161.027	3.33927	2.40836e-36	2.5583e-35	up
LOC_Os11g32170	168.274	262.167	74.3807	-1.81677	2.41653e-36	2.56581e-35	down
LOC_Os07g23660	2493.25	0.692881	4985.81	12.8419	2.78115e-36	2.94893e-35	up
LOC_Os02g12750	349.273	208.281	490.264	1.23779	3.41628e-36	3.61909e-35	up
LOC_Os02g06560	285.277	416.051	154.502	-1.43171	3.72937e-36	3.94898e-35	down
LOC_Os03g11380	361.754	502.341	221.168	-1.18458	4.38285e-36	4.63883e-35	down
LOC_Os12g17430	235.624	122.156	349.093	1.51756	4.78946e-36	5.06002e-35	up
LOC_Os04g01950	99.5533	26.2613	172.845	2.72367	6.16565e-36	6.49925e-35	up
LOC_Os09g25070	445.153	283.629	606.678	1.09385	7.72977e-36	8.126e-35	up
LOC_Os04g49550	95.3141	24.0456	166.582	2.78906	8.4228e-36	8.84659e-35	up
LOC_Os04g37480	87.4957	155.029	19.963	-2.96355	9.54062e-36	1.00116e-34	down
LOC_Os09g18390	121.219	202.078	40.3602	-2.32532	1.04234e-35	1.09282e-34	down
LOC_Os07g36500	422.413	589.086	255.74	-1.20543	1.15543e-35	1.21084e-34	down
LOC_Os04g57130	136.259	220.287	52.2324	-2.0802	1.20554e-35	1.26279e-34	down
LOC_Os01g42070	417.174	573.637	260.71	-1.13527	1.26176e-35	1.32108e-34	down
LOC_Os05g44900	317.498	183.712	451.284	1.29804	1.61067e-35	1.67963e-34	up
LOC_Os02g21920	477.653	308.099	647.207	1.06832	1.87477e-35	1.95155e-34	up
LOC_Os05g33630	134.948	218.033	51.8635	-2.07454	2.2562e-35	2.34338e-34	down
LOC_Os01g74200	428.062	268.818	587.305	1.13194	2.2855e-35	2.37276e-34	up
LOC_Os04g14220	130.607	212.109	49.1045	-2.11003	2.58664e-35	2.68301e-34	down
LOC_Os06g07100	448.639	606.247	291.031	-1.06054	2.79528e-35	2.89813e-34	down
LOC_Os02g32140	96.0924	24.8326	167.352	2.73957	2.92964e-35	3.03609e-34	up
LOC_Os08g44300	222.57	332.083	113.058	-1.55816	2.95693e-35	3.06301e-34	down
LOC_Os12g05690	78.3524	6.58607	150.119	4.47059	3.07174e-35	3.17912e-34	up
LOC_Os01g11620	296.672	422.744	170.6	-1.31119	5.3147e-35	5.47381e-34	down
LOC_Os12g16720	286.931	152.721	421.14	1.45688	6.06057e-35	6.23651e-34	up
novel.617	74.9188	9.26971	140.568	3.93637	6.81002e-35	7.00463e-34	up
LOC_Os05g11810	95.0216	3.7828	186.26	5.63945	6.88844e-35	7.08218e-34	up
LOC_Os03g29340	378.786	534.158	223.415	-1.25746	7.34016e-35	7.53334e-34	down
LOC_Os03g59030	119.25	39.4772	199.022	2.32737	9.78904e-35	1.00246e-33	up
LOC_Os03g22040	473.163	633.311	313.016	-1.01666	1.02211e-34	1.04625e-33	down
novel.508	88.259	21.0368	155.481	2.88471	1.04727e-34	1.07107e-33	up
LOC_Os01g37470	562.487	754.251	370.723	-1.02279	1.13811e-34	1.16194e-33	down
novel.176	432.839	278.665	587.012	1.07396	1.42733e-34	1.45467e-33	up
LOC_Os11g45950	201.055	302.236	99.8739	-1.60061	1.42797e-34	1.45468e-33	down
LOC_Os02g16050	107.727	3.04004	212.414	6.11903	1.47078e-34	1.49699e-33	up
LOC_Os02g49440	166.944	261.936	71.9521	-1.86534	1.48563e-34	1.51145e-33	down
LOC_Os09g29480	80.8642	15.2252	146.503	3.26149	1.57924e-34	1.60459e-33	up
LOC_Os04g01610	197.34	298.002	96.6788	-1.6231	1.62006e-34	1.64535e-33	down
LOC_Os09g27820	142.849	55.9747	229.723	2.04316	1.66125e-34	1.68644e-33	up
LOC_Os01g52130	213.904	104.917	322.892	1.61658	1.69091e-34	1.71581e-33	up
LOC_Os08g37990	172.803	269.658	75.9471	-1.82336	1.94774e-34	1.97385e-33	down
LOC_Os09g31031	595.944	184.787	1007.1	2.44506	2.02764e-34	2.05393e-33	up
novel.148	268.731	143.439	394.023	1.45022	2.10451e-34	2.13087e-33	up
LOC_Os07g35140	352.73	217.09	488.37	1.17024	2.7081e-34	2.7361e-33	up
LOC_Os09g11970	86.0016	153.526	18.4769	-3.05362	3.01813e-34	3.04407e-33	down
LOC_Os01g50530	89.1314	155.553	22.7096	-2.77297	3.33487e-34	3.36062e-33	down
LOC_Os01g39020	103.628	31.7047	175.55	2.47355	3.6902e-34	3.71389e-33	up
LOC_Os07g43290	513.683	689.252	338.114	-1.03094	3.69271e-34	3.71481e-33	down
LOC_Os01g70560	412.947	564.545	261.35	-1.10975	4.0627e-34	4.07999e-33	down
LOC_Os04g23580	294.077	163.189	424.965	1.37608	6.20922e-34	6.22761e-33	up
LOC_Os01g17330	73.4181	8.10265	138.734	4.08855	7.56197e-34	7.56813e-33	up
LOC_Os04g02650	310.802	183.05	438.555	1.26407	8.11125e-34	8.11438e-33	up
LOC_Os02g50630	450.592	605.546	295.639	-1.03366	8.7838e-34	8.76841e-33	down
LOC_Os04g48130	321.827	451.352	192.302	-1.23124	1.1726e-33	1.16655e-32	down
LOC_Os04g15800	384.391	525.782	243.001	-1.1131	1.19081e-33	1.18366e-32	down
LOC_Os10g37100	78.795	15.1685	142.422	3.24915	1.3246e-33	1.31442e-32	up
LOC_Os01g73110	78.4772	15.5872	141.367	3.17876	1.398e-33	1.38607e-32	up
LOC_Os01g43550	214.683	320.019	109.346	-1.54567	1.49591e-33	1.48189e-32	down
LOC_Os07g35540	396.551	252.26	540.842	1.10081	2.12671e-33	2.10321e-32	up
LOC_Os03g56010	89.5051	3.62076	175.389	5.55649	2.40079e-33	2.36925e-32	up
LOC_Os02g42350	308.077	182.707	433.448	1.2477	2.57289e-33	2.53694e-32	up
LOC_Os12g31160	367.728	517.678	217.779	-1.24606	3.12243e-33	3.07232e-32	down
LOC_Os03g20910	221.5	116.77	326.23	1.47913	4.89549e-33	4.8068e-32	up
LOC_Os08g01260	84.1839	20.0691	148.299	2.88629	5.56327e-33	5.4556e-32	up
LOC_Os04g41310	226.852	118.812	334.892	1.48873	5.92421e-33	5.79981e-32	up
LOC_Os11g42510	73.3592	7.12879	139.59	4.2889	6.10428e-33	5.9736e-32	up
LOC_Os01g03870	303.745	173.392	434.099	1.3298	6.17498e-33	6.04026e-32	up
LOC_Os06g05450	214.293	109.322	319.263	1.54723	8.57088e-33	8.36287e-32	up
LOC_Os09g03200	72.7973	5.91127	139.683	4.59354	8.63073e-33	8.41775e-32	up
LOC_Os03g01850	275.403	398.122	152.684	-1.38326	1.03162e-32	1.00323e-31	down
LOC_Os04g48170	179.874	273.77	85.9767	-1.67121	1.18379e-32	1.15074e-31	down
LOC_Os02g45780	135.725	54.883	216.568	1.97741	1.19579e-32	1.16192e-31	up
LOC_Os02g57810	73.0168	11.711	134.323	3.50042	1.20757e-32	1.17288e-31	up
LOC_Os07g37280	82.604	4.02641	161.182	5.30701	1.30479e-32	1.26624e-31	up
LOC_Os06g05070	417.91	269.837	565.983	1.07101	1.38192e-32	1.33999e-31	up
LOC_Os09g28300	262.498	378.766	146.23	-1.37482	1.39764e-32	1.35467e-31	down
LOC_Os01g44110	461.353	621.302	301.403	-1.04447	1.6321e-32	1.57864e-31	down
LOC_Os07g49000	124.45	200.386	48.5146	-2.04715	2.17352e-32	2.09539e-31	down
LOC_Os06g24490	430.604	581.639	279.569	-1.05801	2.53554e-32	2.44037e-31	down
LOC_Os10g37160	70.4745	10.7433	130.206	3.58458	2.88347e-32	2.77067e-31	up
LOC_Os01g40499	173.552	79.3767	267.727	1.75906	3.11689e-32	2.99127e-31	up
LOC_Os06g39780	448.162	286.638	609.685	1.08513	3.41011e-32	3.2673e-31	up
LOC_Os02g45690	212.783	109.197	316.368	1.53733	3.57105e-32	3.4201e-31	up
LOC_Os04g53606	74.1118	13.9703	134.253	3.26764	3.79385e-32	3.62753e-31	up
LOC_Os06g32990	196.5	293.72	99.2789	-1.56134	3.81808e-32	3.6492e-31	down
LOC_Os08g32960	228.323	335.147	121.499	-1.46156	3.89696e-32	3.72155e-31	down
LOC_Os03g08930	317.2	191.735	442.664	1.20422	4.11469e-32	3.92787e-31	up
LOC_Os03g04060	95.8275	27.9786	163.676	2.54207	4.24201e-32	4.04611e-31	up
LOC_Os11g17480	410.39	267.167	553.614	1.05011	4.40768e-32	4.20241e-31	up
LOC_Os01g37040	328.886	194.43	463.343	1.25503	4.52161e-32	4.30928e-31	up
LOC_Os06g08470	222.867	326.867	118.867	-1.45654	4.5637e-32	4.34761e-31	down
LOC_Os11g29870	361.592	224.143	499.041	1.15681	5.08278e-32	4.8362e-31	up
LOC_Os11g37560	260.918	148.843	372.993	1.32454	5.35526e-32	5.09338e-31	up
LOC_Os02g11980	126.735	48.6652	204.804	2.0742	5.42836e-32	5.16081e-31	up
LOC_Os04g12499	151.957	237.809	66.105	-1.84859	5.62274e-32	5.34343e-31	down
LOC_Os03g60260	262.226	150.067	374.385	1.31669	6.90264e-32	6.5491e-31	up
LOC_Os05g50610	70.2493	5.89319	134.605	4.4656	7.4462e-32	7.05908e-31	up
novel.736	131.178	52.4411	209.914	2.00993	7.60657e-32	7.20819e-31	up
LOC_Os06g47250	177.814	269.276	86.3529	-1.63824	7.74311e-32	7.3346e-31	down
LOC_Os11g32620	72.4325	130.871	13.9944	-3.22527	8.72218e-32	8.25198e-31	down
LOC_Os02g54140	68.2916	8.71454	127.869	3.8595	9.77096e-32	9.233e-31	up
LOC_Os10g32170	81.8731	19.932	143.814	2.84492	9.99848e-32	9.44418e-31	up
LOC_Os06g04240	100.372	32.0038	168.741	2.41194	1.08812e-31	1.02655e-30	up
LOC_Os01g22910	228.648	124.54	332.756	1.4221	1.22405e-31	1.15247e-30	up
LOC_Os06g17490	299.053	417.514	180.591	-1.2101	1.36049e-31	1.27989e-30	down
LOC_Os05g05020	329.32	199.618	459.021	1.20105	1.36537e-31	1.28397e-30	up
LOC_Os08g37130	70.6063	5.90565	135.307	4.47499	1.57627e-31	1.47872e-30	up
LOC_Os09g06770	71.6169	13.24	129.994	3.29429	2.02098e-31	1.89287e-30	up
LOC_Os02g53380	366.617	225.784	507.45	1.17188	2.19299e-31	2.05232e-30	up
LOC_Os05g42080	167.052	78.6658	255.438	1.70162	2.74844e-31	2.56393e-30	up
LOC_Os03g03320	174.097	264.988	83.2059	-1.6667	2.94172e-31	2.74095e-30	down
novel.289	435.937	289.918	581.957	1.00781	3.39459e-31	3.16039e-30	up
LOC_Os05g03590	286.865	404.095	169.635	-1.25332	3.52038e-31	3.27359e-30	down
LOC_Os02g49310	452.896	606.408	299.383	-1.01928	4.08053e-31	3.78844e-30	down
LOC_Os04g56570	163.936	77.2114	250.661	1.69924	4.11662e-31	3.82043e-30	up
LOC_Os06g46060	363.129	229.531	496.726	1.11329	4.13113e-31	3.83237e-30	up
LOC_Os01g16650	409.941	549.797	270.085	-1.02685	4.35227e-31	4.03591e-30	down
LOC_Os06g37140	237.541	131.251	343.83	1.39147	5.16117e-31	4.78032e-30	up
LOC_Os11g25454	332.684	202.372	462.997	1.19072	6.59238e-31	6.09626e-30	up
LOC_Os03g04250	280.446	396.963	163.929	-1.27703	6.98133e-31	6.45338e-30	down
LOC_Os10g28240	142.526	62.4735	222.579	1.83329	7.00619e-31	6.47379e-30	up
LOC_Os09g37600	476.459	638.72	314.198	-1.02336	7.17487e-31	6.62703e-30	down
LOC_Os11g06770	411.308	1.03619	821.579	9.65514	7.39573e-31	6.82833e-30	up
LOC_Os07g31470	282.898	167.576	398.22	1.25032	9.78474e-31	8.9985e-30	up
LOC_Os02g58160	81.1876	21.0866	141.289	2.74556	1.26717e-30	1.16168e-29	up
LOC_Os09g26780	228.241	126.451	330.031	1.38564	1.29136e-30	1.1834e-29	up
LOC_Os03g14810	319.518	441.06	197.975	-1.15566	1.3428e-30	1.23006e-29	down
LOC_Os04g38690	67.3532	123.032	11.6748	-3.3962	1.36176e-30	1.24694e-29	down
LOC_Os07g04730	101.608	168.818	34.3979	-2.29256	1.462e-30	1.33611e-29	down
LOC_Os03g17780	294.067	174.793	413.342	1.24043	1.54407e-30	1.41056e-29	up
LOC_Os11g47630	222.797	323.746	121.849	-1.40745	1.54667e-30	1.41238e-29	down
LOC_Os10g39740	444.862	595.454	294.27	-1.02011	1.77656e-30	1.62041e-29	down
LOC_Os02g03120	368.346	505.063	231.629	-1.12387	1.80944e-30	1.64975e-29	down
LOC_Os07g45370	162.97	248.128	77.811	-1.67481	1.82268e-30	1.66053e-29	down
LOC_Os01g01870	248.487	138.8	358.174	1.36185	1.83705e-30	1.67296e-29	up
LOC_Os04g41860	283.887	408.613	159.162	-1.3624	1.99727e-30	1.81463e-29	down
LOC_Os08g14000	129.698	53.8213	205.574	1.93569	2.13029e-30	1.93323e-29	up
LOC_Os03g19290	85.3664	2.90297	167.83	5.78093	2.19816e-30	1.99328e-29	up
LOC_Os06g46990	337.089	462.127	212.05	-1.12338	2.23111e-30	2.02159e-29	down
LOC_Os04g56790	480.656	318.743	642.57	1.00822	2.65404e-30	2.40293e-29	up
LOC_Os12g25200	291.548	409.829	173.267	-1.2442	2.922e-30	2.64247e-29	down
LOC_Os02g47660	307.699	188.25	427.148	1.18294	3.00077e-30	2.7116e-29	up
LOC_Os04g43230	323.917	451.04	196.795	-1.1931	3.41486e-30	3.08102e-29	down
LOC_Os10g40020	329.45	206.296	452.604	1.13542	3.4861e-30	3.14408e-29	up
LOC_Os11g15130	131.951	207.471	56.431	-1.88115	3.71952e-30	3.35331e-29	down
LOC_Os12g33120	146.058	290.481	1.63414	-7.48031	3.7789e-30	3.40553e-29	down
novel.646	65.4507	5.85519	125.046	4.43471	4.02187e-30	3.6231e-29	up
LOC_Os03g13150	70.1985	13.4712	126.926	3.22458	4.3478e-30	3.91369e-29	up
LOC_Os10g34910	134.271	54.0705	214.472	1.99485	5.07751e-30	4.56702e-29	up
LOC_Os02g02780	224.965	122.775	327.154	1.40946	5.30537e-30	4.77013e-29	up
LOC_Os06g29470	126.484	200.08	52.8876	-1.91692	5.75206e-30	5.16778e-29	down
LOC_Os04g48850	126.497	51.9806	201.014	1.94599	5.89042e-30	5.29006e-29	up
LOC_Os01g43950	265.051	375.715	154.387	-1.28269	7.22541e-30	6.47653e-29	down
novel.52	64.0513	8.26469	119.838	3.87521	7.23755e-30	6.48492e-29	up
novel.53	75.1472	16.5238	133.771	3.00893	7.36057e-30	6.59262e-29	up
LOC_Os10g28420	104.712	174.086	35.3382	-2.29562	7.36349e-30	6.5927e-29	down
LOC_Os03g42710	99.2233	31.6492	166.797	2.38809	7.66059e-30	6.85346e-29	up
LOC_Os12g15530	104.565	35.2887	173.841	2.28956	1.09317e-29	9.75e-29	up
LOC_Os02g09250	81.4883	3.18337	159.793	5.70653	1.16982e-29	1.04217e-28	up
LOC_Os06g41670	186.884	96.1378	277.63	1.53263	1.23995e-29	1.10381e-28	up
LOC_Os02g37070	313.006	195.111	430.901	1.14398	1.29125e-29	1.14904e-28	up
LOC_Os01g45659	81.2635	3.03384	159.493	5.70659	1.3676e-29	1.21513e-28	up
LOC_Os12g29950	368.852	234.463	503.242	1.10205	1.47573e-29	1.30871e-28	up
novel.340	202.991	303.7	102.283	-1.56379	1.48012e-29	1.31211e-28	down
LOC_Os07g06860	203.171	106.333	300.008	1.49146	1.73881e-29	1.5391e-28	up
LOC_Os04g51090	90.9905	28.8148	153.166	2.40948	2.1773e-29	1.9214e-28	up
LOC_Os11g19210	340.085	215.005	465.165	1.11441	2.1989e-29	1.93973e-28	up
LOC_Os03g22590	979.749	0.661713	1958.84	11.4936	2.27216e-29	2.0036e-28	up
LOC_Os09g29820	336.92	201.529	472.312	1.22744	2.59406e-29	2.28228e-28	up
LOC_Os03g49430	65.9431	4.84391	127.042	4.73846	2.61712e-29	2.30171e-28	up
LOC_Os03g21970	268.267	378.039	158.494	-1.25468	3.31367e-29	2.91211e-28	down
LOC_Os06g21920	65.6664	119.503	11.8298	-3.34746	3.51678e-29	3.08829e-28	down
LOC_Os06g05000	100.946	35.8557	166.036	2.21655	3.67414e-29	3.22526e-28	up
LOC_Os02g13190	112.277	180.728	43.8259	-2.04918	3.69591e-29	3.24316e-28	down
LOC_Os01g57050	139.05	62.1931	215.908	1.79117	3.699e-29	3.24465e-28	up
LOC_Os01g55500	346.98	471.89	222.07	-1.08524	3.72972e-29	3.27036e-28	down
LOC_Os01g52470	62.4905	7.18487	117.796	4.04587	3.76093e-29	3.2965e-28	up
LOC_Os06g11030	132.534	56.1754	208.892	1.89205	4.172e-29	3.65132e-28	up
LOC_Os10g36580	220.441	328.38	112.503	-1.53891	4.33304e-29	3.78942e-28	down
LOC_Os06g05010	67.1366	12.1041	122.169	3.32506	4.59387e-29	4.01302e-28	up
LOC_Os05g33400	297.886	181.427	414.344	1.19225	4.78586e-29	4.17917e-28	up
LOC_Os06g05960	109.812	177.414	42.2096	-2.06918	5.70509e-29	4.9763e-28	down
LOC_Os03g11400	358.666	484.669	232.664	-1.05784	5.72435e-29	4.99123e-28	down
LOC_Os06g48020	65.5968	11.7359	119.458	3.33166	5.77052e-29	5.02961e-28	up
LOC_Os01g36590	382.023	246.822	517.224	1.06778	5.91452e-29	5.14744e-28	up
LOC_Os04g58734	114.309	183.637	44.9808	-2.03069	6.39535e-29	5.5597e-28	down
LOC_Os04g54610	72.9102	16.7486	129.072	2.93168	7.39012e-29	6.41016e-28	up
LOC_Os07g11739	62.1506	5.83028	118.471	4.35877	1.06087e-28	9.17128e-28	up
LOC_Os01g69290	263.219	370.08	156.359	-1.2458	1.11357e-28	9.62337e-28	down
novel.769	323.033	440.374	205.692	-1.09924	1.31139e-28	1.13245e-27	down
LOC_Os09g34020	68.7878	14.994	122.582	3.03551	1.32573e-28	1.14441e-27	up
LOC_Os07g34040	286.282	173.919	398.646	1.19452	1.37607e-28	1.18684e-27	up
LOC_Os05g15530	146.69	68.9032	224.476	1.70335	1.37641e-28	1.18684e-27	up
novel.1061	101.71	34.2887	169.132	2.30956	1.47958e-28	1.27534e-27	up
LOC_Os02g55600	127.74	51.7115	203.768	1.97756	1.60372e-28	1.3803e-27	up
LOC_Os03g07810	330.384	449.082	211.686	-1.08546	1.60633e-28	1.38203e-27	down
LOC_Os06g23140	118.469	188.932	48.0054	-1.98187	1.78316e-28	1.53361e-27	down
LOC_Os03g07350	374.13	506.089	242.171	-1.06092	1.83587e-28	1.57778e-27	down
LOC_Os05g02110	311.92	429.618	194.222	-1.14447	1.94474e-28	1.66827e-27	down
LOC_Os05g51620	286.941	403.084	170.798	-1.23906	2.1603e-28	1.84912e-27	down
LOC_Os08g10080	297.219	410.622	183.815	-1.16105	2.35021e-28	2.00873e-27	down
LOC_Os11g37100	375.012	508.262	241.761	-1.0754	2.55925e-28	2.185e-27	down
LOC_Os06g01840	309.949	189.93	429.967	1.17735	2.64612e-28	2.25751e-27	up
LOC_Os10g06140	60.3913	6.56053	114.222	4.14452	2.74734e-28	2.34215e-27	up
novel.55	60.4879	5.81157	115.164	4.31724	2.8666e-28	2.44116e-27	up
LOC_Os12g05210	64.0697	4.28248	123.857	4.81337	3.17421e-28	2.70105e-27	up
LOC_Os02g57460	236.204	135.015	337.394	1.32364	3.22083e-28	2.73882e-27	up
LOC_Os03g62060	61.9414	119.685	4.19797	-4.82442	3.51113e-28	2.98459e-27	down
LOC_Os06g50240	265.393	372.468	158.319	-1.23629	4.21428e-28	3.57578e-27	down
LOC_Os11g13840	66.5663	12.9029	120.23	3.22141	4.26027e-28	3.61349e-27	up
LOC_Os07g26320	73.3963	3.07121	143.721	5.55514	5.66701e-28	4.80144e-27	up
LOC_Os03g57680	362.605	487.934	237.277	-1.03954	6.21282e-28	5.25816e-27	down
LOC_Os03g01740	442.072	291.452	592.693	1.02734	6.96175e-28	5.88136e-27	up
LOC_Os01g32920	170.658	87.5049	253.812	1.53929	7.21047e-28	6.08927e-27	up
LOC_Os09g38670	108.554	41.2865	175.821	2.09459	7.61224e-28	6.42393e-27	up
LOC_Os05g30500	71.1209	17.5469	124.695	2.84367	8.16775e-28	6.88029e-27	up
LOC_Os09g25990	287.89	401.302	174.478	-1.19898	8.4543e-28	7.11654e-27	down
LOC_Os01g06230	109.884	176.685	43.0827	-2.03353	8.86497e-28	7.45417e-27	down
LOC_Os10g23310	59.1078	6.70443	111.511	4.03805	9.23846e-28	7.76263e-27	up
LOC_Os01g46950	358.546	481.991	235.101	-1.03683	9.56975e-28	8.03522e-27	down
LOC_Os03g57410	173.717	259.509	87.9255	-1.56173	9.95433e-28	8.35513e-27	down
LOC_Os12g36750	244.052	140.329	347.776	1.30626	1.01942e-27	8.55033e-27	up
novel.319	109.33	175.131	43.5301	-2.0094	1.12692e-27	9.44178e-27	down
LOC_Os12g44220	412.309	274.506	550.112	1.0051	1.26656e-27	1.0589e-26	up
LOC_Os04g30420	145.16	68.5094	221.811	1.69774	1.46089e-27	1.21962e-26	up
LOC_Os03g01570	393.652	261.877	525.427	1.0081	1.54623e-27	1.28994e-26	up
LOC_Os11g01620	339.556	458.796	220.316	-1.05945	1.97921e-27	1.64704e-26	down
LOC_Os03g38540	384.5	514.004	254.996	-1.00918	1.99235e-27	1.65738e-26	down
LOC_Os12g32760	332.171	212.352	451.991	1.09061	2.1798e-27	1.81267e-26	up
novel.616	59.545	9.32579	109.764	3.57878	2.19199e-27	1.82216e-26	up
LOC_Os06g08250	170.396	254.352	86.4407	-1.55752	2.21425e-27	1.84001e-26	down
LOC_Os01g72210	169.573	87.3871	251.759	1.52413	2.54537e-27	2.11141e-26	up
novel.201	67.661	3.47686	131.845	5.27879	2.7728e-27	2.29762e-26	up
LOC_Os04g43200	59.1515	5.23085	113.072	4.46955	2.78397e-27	2.30606e-26	up
LOC_Os06g25010	76.6445	21.9602	131.329	2.59207	3.076e-27	2.54434e-26	up
LOC_Os04g44354	134.449	207.665	61.2326	-1.7585	3.11806e-27	2.57822e-26	down
LOC_Os06g45100	185.596	99.1274	272.064	1.4629	3.15311e-27	2.60628e-26	up
LOC_Os09g24350	245.816	352.642	138.99	-1.34073	3.30281e-27	2.72616e-26	down
LOC_Os04g49160	139.563	65.6886	213.437	1.69709	3.46019e-27	2.85405e-26	up
LOC_Os12g02750	325.327	444.372	206.281	-1.10469	3.84609e-27	3.16899e-26	down
LOC_Os06g02390	108.047	174.292	41.8019	-2.0549	3.94855e-27	3.25227e-26	down
LOC_Os05g11620	94.5943	32.6593	156.529	2.27427	3.99069e-27	3.28582e-26	up
LOC_Os07g36750	189.346	277.411	101.28	-1.4533	4.04992e-27	3.33289e-26	down
LOC_Os03g43770	155.097	77.2058	232.988	1.59048	4.11082e-27	3.38115e-26	up
LOC_Os06g48250	559.147	281.34	836.953	1.57013	4.48433e-27	3.68707e-26	up
LOC_Os03g16170	91.521	30.6249	152.417	2.31584	4.6208e-27	3.79793e-26	up
LOC_Os04g56920	142.437	64.9708	219.903	1.75562	4.6543e-27	3.82277e-26	up
LOC_Os03g51530	291.251	179.037	403.466	1.17242	4.93217e-27	4.04816e-26	up
LOC_Os05g45350	301.715	182.093	421.337	1.21678	5.29252e-27	4.34087e-26	up
LOC_Os01g34020	69.4566	3.01513	135.898	5.47454	5.63585e-27	4.61923e-26	up
LOC_Os10g38660	56.1224	107.045	5.19982	-4.36506	6.3021e-27	5.15805e-26	down
LOC_Os01g02600	178.608	93.4858	263.73	1.49458	7.15407e-27	5.84512e-26	up
LOC_Os01g71700	118.932	50.4254	187.44	1.89623	8.43671e-27	6.87864e-26	up
LOC_Os11g45980	233.542	329.279	137.805	-1.2588	8.81202e-27	7.17462e-26	down
LOC_Os07g37400	175.771	93.0915	258.451	1.47659	9.25473e-27	7.52982e-26	up
LOC_Os09g32840	221.325	127.675	314.975	1.30007	9.2689e-27	7.53873e-26	up
novel.825	168.55	86.9865	250.114	1.52725	9.87678e-27	8.02755e-26	up
LOC_Os03g59580	379.075	512.582	245.567	-1.06339	1.02551e-26	8.32342e-26	down
LOC_Os05g02240	75.1129	20.8492	129.376	2.63975	1.02603e-26	8.3248e-26	up
LOC_Os03g20380	295.934	405.649	186.218	-1.12555	1.06754e-26	8.6586e-26	down
LOC_Os01g71170	145.23	219.682	70.7787	-1.63748	1.09687e-26	8.89338e-26	down
LOC_Os01g57030	134.038	205.681	62.395	-1.72211	1.10124e-26	8.92571e-26	down
LOC_Os02g12440	251.532	150.646	352.419	1.22897	1.34448e-26	1.08783e-25	up
LOC_Os01g62810	180.613	96.6058	264.621	1.45881	1.35528e-26	1.09619e-25	up
LOC_Os05g03934	358.924	238.177	479.671	1.00982	1.36423e-26	1.10305e-25	up
LOC_Os03g47270	72.4685	16.4178	128.519	2.95085	1.42978e-26	1.15565e-25	up
LOC_Os05g06520	108.477	172.195	44.7584	-1.94803	1.5109e-26	1.22037e-25	down
LOC_Os03g63930	245.877	344.024	147.731	-1.22092	1.53009e-26	1.23544e-25	down
LOC_Os06g44450	114.53	47.4302	181.629	1.92829	1.73757e-26	1.40152e-25	up
LOC_Os01g10870	79.2633	2.37833	156.148	6.03741	1.74464e-26	1.40674e-25	up
LOC_Os07g02440	283.128	388.112	178.145	-1.124	1.81775e-26	1.46416e-25	down
LOC_Os01g57510	129.602	58.6521	200.552	1.78368	1.85328e-26	1.4913e-25	up
LOC_Os07g01214	213.342	303.891	122.792	-1.30918	2.03777e-26	1.63743e-25	down
LOC_Os07g09814	266.511	162.495	370.526	1.18869	2.2138e-26	1.77705e-25	up
LOC_Os02g36140	230.138	130.37	329.905	1.34376	2.35757e-26	1.89051e-25	up
LOC_Os01g60640	56.3234	7.68397	104.963	3.80777	2.63309e-26	2.11e-25	up
LOC_Os02g53660	131.381	60.5126	202.25	1.74662	2.64332e-26	2.11747e-25	up
LOC_Os04g56180	327.354	441.672	213.035	-1.05119	2.77268e-26	2.21957e-25	down
LOC_Os06g19360	57.3246	9.13884	105.51	3.52593	2.79246e-26	2.23464e-25	up
LOC_Os05g30660	191.618	104.173	279.063	1.41795	2.98092e-26	2.38382e-25	up
LOC_Os05g09500	329.343	210.611	448.074	1.08939	3.03736e-26	2.42729e-25	up
LOC_Os06g19010	308.344	421.092	195.596	-1.10662	3.20749e-26	2.56237e-25	down
LOC_Os10g38110	61.3281	11.9415	110.715	3.21651	3.63709e-26	2.89962e-25	up
LOC_Os04g29030	228.721	321.787	135.655	-1.24589	3.86068e-26	3.07682e-25	down
LOC_Os02g08230	73.2783	124.841	21.7155	-2.51986	5.30345e-26	4.20799e-25	down
LOC_Os11g26760	234.271	0.967657	467.574	8.84216	5.49106e-26	4.35537e-25	up
LOC_Os04g41820	334.258	453.875	214.641	-1.08341	5.68999e-26	4.50856e-25	down
LOC_Os07g39320	101.827	165.285	38.3687	-2.09876	6.18187e-26	4.89002e-25	down
LOC_Os11g25700	60.8342	109.391	12.2774	-3.14728	6.33043e-26	5.00414e-25	down
LOC_Os12g32710	283.079	389.319	176.839	-1.13973	6.34519e-26	5.01412e-25	down
LOC_Os11g24340	212.431	302.261	122.601	-1.30159	6.81003e-26	5.37599e-25	down
LOC_Os01g62190	340.89	218.066	463.714	1.08554	7.12267e-26	5.62089e-25	up
LOC_Os04g31960	56.0041	8.47713	103.531	3.608	7.37495e-26	5.81605e-25	up
LOC_Os10g25450	207.843	302.701	112.986	-1.42263	7.92927e-26	6.24668e-25	down
LOC_Os03g18490	64.5698	15.1311	114.009	2.92725	7.9317e-26	6.24668e-25	up
LOC_Os09g38450	278.332	386.443	170.22	-1.18002	8.12736e-26	6.39862e-25	down
LOC_Os08g37040	267.417	164.543	370.292	1.1669	8.24733e-26	6.49088e-25	up
LOC_Os08g16820	132.173	62.0112	202.334	1.71018	8.88868e-26	6.98388e-25	up
LOC_Os09g29600	216.663	314.213	119.112	-1.40188	1.02104e-25	8.01156e-25	down
LOC_Os03g44380	272.799	167.246	378.352	1.17519	1.03173e-25	8.09271e-25	up
LOC_Os06g41740	334.321	213.016	455.626	1.0937	1.18051e-25	9.24732e-25	up
LOC_Os06g10950	92.247	149.711	34.783	-2.10643	1.26926e-25	9.92925e-25	down
LOC_Os12g17530	168.746	249.537	87.9552	-1.50118	1.29742e-25	1.01461e-24	down
LOC_Os08g04800	94.5604	35.2501	153.871	2.13279	1.43698e-25	1.12187e-24	up
LOC_Os01g29804	210.625	122.082	299.168	1.29198	1.57155e-25	1.2257e-24	up
LOC_Os11g02470	74.454	21.3109	127.597	2.59357	1.66213e-25	1.29505e-24	up
LOC_Os08g04540	117.833	49.9637	185.703	1.89313	1.66667e-25	1.29816e-24	up
LOC_Os09g32570	65.4973	14.3816	116.613	3.05626	2.00244e-25	1.55554e-24	up
LOC_Os04g06300	135.526	205.811	65.2406	-1.65634	2.20533e-25	1.7103e-24	down
LOC_Os01g50590	75.41	22.6599	128.16	2.49525	2.24048e-25	1.73699e-24	up
LOC_Os05g05080	63.347	13.4961	113.198	3.05953	2.61269e-25	2.02287e-24	up
LOC_Os06g37010	89.9417	147.026	32.8571	-2.16192	2.71632e-25	2.10171e-24	down
LOC_Os01g44250	117.296	48.8034	185.788	1.92153	2.726e-25	2.1085e-24	up
LOC_Os11g20020	305.895	413.818	197.972	-1.06606	2.78957e-25	2.15624e-24	down
LOC_Os01g21144	76.0072	23.1023	128.912	2.49624	2.87645e-25	2.22193e-24	up
LOC_Os11g03910	130.066	60.6759	199.455	1.7158	3.14689e-25	2.42601e-24	up
LOC_Os04g37700	135.036	64.9447	205.126	1.66495	3.17458e-25	2.44655e-24	up
LOC_Os04g28780	106.516	167.764	45.2682	-1.89213	3.21379e-25	2.47596e-24	down
LOC_Os07g38550	136.314	206.585	66.0435	-1.64597	3.25446e-25	2.50646e-24	down
LOC_Os01g63930	234.439	139.423	329.455	1.24293	3.26848e-25	2.51643e-24	up
LOC_Os10g38580	190.019	278.104	101.933	-1.44495	3.52513e-25	2.71224e-24	down
LOC_Os02g42560	301.587	412.189	190.986	-1.11094	4.78153e-25	3.66443e-24	down
LOC_Os01g47900	107.893	169.904	45.8815	-1.88759	4.86928e-25	3.73045e-24	down
LOC_Os10g38940	70.6302	20.3626	120.898	2.56947	6.4031e-25	4.89271e-24	up
LOC_Os05g06940	179.734	262.92	96.5479	-1.44252	7.74929e-25	5.90204e-24	down
LOC_Os04g29000	60.3081	107.018	13.5986	-2.9677	7.8057e-25	5.94307e-24	down
LOC_Os02g43330	126.676	1.35459	251.998	7.53606	8.16541e-25	6.2129e-24	up
LOC_Os10g23240	70.0313	2.30979	137.753	5.85864	9.13484e-25	6.93581e-24	up
LOC_Os05g31760	117.564	182.377	52.7501	-1.79152	9.35167e-25	7.09469e-24	down
LOC_Os02g47650	258.932	158.712	359.151	1.17796	9.52616e-25	7.22472e-24	up
LOC_Os02g08170	221.845	127.145	316.545	1.31335	1.01942e-24	7.72381e-24	up
LOC_Os05g12630	146.808	218.808	74.809	-1.54976	1.03494e-24	7.83639e-24	down
LOC_Os05g32860	293.914	181.82	406.009	1.15908	1.05148e-24	7.95645e-24	up
novel.271	92.5987	32.9663	152.231	2.19658	1.08062e-24	8.17426e-24	up
LOC_Os11g35450	235.076	328.285	141.867	-1.20837	1.27998e-24	9.66041e-24	down
LOC_Os10g41870	224.227	316.236	132.219	-1.25574	1.29765e-24	9.7875e-24	down
LOC_Os12g38320	105.101	165.704	44.4985	-1.90364	1.3233e-24	9.97451e-24	down
LOC_Os05g09480	278.632	174.937	382.326	1.1243	1.33521e-24	1.0061e-23	up
LOC_Os06g13940	82.0406	28.1406	135.941	2.2693	1.33914e-24	1.00873e-23	up
LOC_Os07g34620	310.087	422.061	198.113	-1.08915	1.416e-24	1.06595e-23	down
LOC_Os08g24300	85.8336	31.3863	140.281	2.16457	1.43465e-24	1.07964e-23	up
LOC_Os09g37540	67.7553	18.2029	117.308	2.67766	1.50705e-24	1.13287e-23	up
LOC_Os09g36900	316.136	425.274	206.998	-1.04166	1.51024e-24	1.13469e-23	down
LOC_Os01g72680	148.786	225.148	72.4235	-1.63817	1.58006e-24	1.18563e-23	down
LOC_Os09g17146	52.6288	5.51188	99.7457	4.19807	1.86716e-24	1.39971e-23	up
LOC_Os04g54210	311.724	202.721	420.728	1.05401	1.90722e-24	1.42883e-23	up
LOC_Os01g11550	269.122	368.1	170.144	-1.11454	1.95337e-24	1.46293e-23	down
LOC_Os06g17260	104.786	164.997	44.5744	-1.88736	2.02163e-24	1.5126e-23	down
LOC_Os03g17680	97.7466	39.583	155.91	1.97349	2.0963e-24	1.56796e-23	up
LOC_Os11g42200	62.2083	14.526	109.891	2.91201	2.12017e-24	1.58531e-23	up
LOC_Os06g02530	328.036	438.387	217.684	-1.00859	2.14599e-24	1.6041e-23	down
LOC_Os05g20020	129.006	60.9127	197.099	1.69439	2.18857e-24	1.63541e-23	up
LOC_Os12g02720	82.1664	135.203	29.1299	-2.22079	2.47943e-24	1.84861e-23	down
LOC_Os05g08750	63.1943	16.0682	110.32	2.76277	2.97879e-24	2.21527e-23	up
LOC_Os11g40030	284.198	388.78	179.616	-1.11241	3.27785e-24	2.4338e-23	down
LOC_Os06g46670	283.36	383.842	182.877	-1.06832	3.28869e-24	2.44107e-23	down
LOC_Os06g05020	55.6195	9.75073	101.488	3.37053	3.31883e-24	2.46188e-23	up
LOC_Os01g61210	51.6625	94.9079	8.41718	-3.48667	3.7736e-24	2.79745e-23	down
LOC_Os01g60120	292.16	395.154	189.167	-1.06508	4.71636e-24	3.48969e-23	down
LOC_Os06g41070	51.9581	4.84391	99.0723	4.37631	4.9832e-24	3.68362e-23	up
LOC_Os10g40470	64.4304	126.584	2.27705	-5.79941	5.03662e-24	3.72194e-23	down
LOC_Os04g34580	178.155	257.822	98.4872	-1.38825	5.32492e-24	3.92877e-23	down
LOC_Os05g25560	50.6325	6.74806	94.517	3.79879	5.41731e-24	3.99441e-23	up
LOC_Os09g35790	172.299	93.466	251.132	1.43116	5.43533e-24	4.00643e-23	up
LOC_Os10g37570	263.054	358.76	167.347	-1.09905	6.44795e-24	4.74386e-23	down
LOC_Os12g08900	99.2364	157.892	40.5805	-1.95483	6.73531e-24	4.95216e-23	down
LOC_Os05g42070	125.124	59.983	190.265	1.66343	7.30075e-24	5.35947e-23	up
LOC_Os09g39430	227.839	138.612	317.066	1.19207	7.55477e-24	5.53898e-23	up
LOC_Os09g11630	54.8685	3.52668	106.21	4.96264	7.5636e-24	5.54371e-23	up
LOC_Os11g05490	109.71	47.6097	171.81	1.86143	8.26074e-24	6.04899e-23	up
LOC_Os07g35330	192.65	111.114	274.186	1.30433	8.79045e-24	6.4268e-23	up
LOC_Os06g49300	286.287	390.05	182.524	-1.09688	8.86156e-24	6.47676e-23	down
LOC_Os08g03310	64.9996	17.8653	112.134	2.66336	9.59058e-24	7.00739e-23	up
LOC_Os02g12680	51.4709	8.33322	94.6086	3.53266	1.04704e-23	7.6335e-23	up
LOC_Os08g42570	79.3586	27.3169	131.4	2.25883	1.07657e-23	7.84637e-23	up
LOC_Os05g29170	153.11	225.2	81.0212	-1.47582	1.12362e-23	8.1791e-23	down
LOC_Os01g04050	202.195	113.1	291.289	1.36072	1.19193e-23	8.65473e-23	up
LOC_Os07g28880	184.076	263.284	104.868	-1.32961	1.26966e-23	9.20485e-23	down
LOC_Os08g31250	150.736	74.4343	227.038	1.60369	1.29118e-23	9.35503e-23	up
LOC_Os05g46760	110.474	49.5892	171.358	1.79026	1.42296e-23	1.02971e-22	up
LOC_Os03g41330	174.786	94.1346	255.438	1.43878	1.69879e-23	1.22627e-22	up
novel.625	81.8649	27.5848	136.145	2.30424	1.72918e-23	1.24782e-22	up
LOC_Os06g04230	230.166	138.58	321.752	1.21535	1.76758e-23	1.27514e-22	up
LOC_Os06g33970	68.544	20.4187	116.669	2.51579	1.81965e-23	1.31229e-22	up
LOC_Os05g03770	84.7489	31.6991	137.799	2.11314	1.86298e-23	1.34313e-22	up
LOC_Os09g27650	276.947	377.562	176.331	-1.10105	1.92801e-23	1.38958e-22	down
LOC_Os07g41230	158.222	81.133	235.311	1.52821	1.98099e-23	1.42689e-22	up
LOC_Os09g20220	49.949	7.12254	92.7754	3.7013	1.99185e-23	1.43427e-22	up
LOC_Os01g61044	55.2016	9.56378	100.839	3.36116	2.17419e-23	1.56412e-22	up
LOC_Os01g55820	324.483	435.537	213.429	-1.03251	2.32432e-23	1.67058e-22	down
LOC_Os09g31430	214.081	128.292	299.869	1.22621	2.36029e-23	1.69591e-22	up
LOC_Os07g43925	121.13	55.202	187.059	1.75406	2.38148e-23	1.71061e-22	up
LOC_Os11g14480	66.1353	113.167	19.1036	-2.55961	2.47865e-23	1.77931e-22	down
LOC_Os05g48840	297.454	398.755	196.152	-1.02481	2.54913e-23	1.82917e-22	down
LOC_Os10g02920	150.736	76.7384	224.734	1.54219	2.66873e-23	1.91282e-22	up
LOC_Os01g64360	285.547	182.578	388.517	1.0862	2.74846e-23	1.96815e-22	up
LOC_Os03g22410	219.18	307.435	130.925	-1.23319	2.89507e-23	2.07251e-22	down
LOC_Os11g16990	156.056	229.829	82.2824	-1.47953	3.55103e-23	2.53588e-22	down
LOC_Os03g07660	70.3657	22.2537	118.478	2.42102	3.79963e-23	2.71092e-22	up
LOC_Os10g04090	97.1245	156.77	37.4787	-2.05748	4.14186e-23	2.94879e-22	down
LOC_Os01g19330	59.6598	14.8196	104.5	2.80976	4.9281e-23	3.50001e-22	up
LOC_Os09g30411	98.469	40.669	156.269	1.94154	4.95729e-23	3.51968e-22	up
LOC_Os09g25720	156.827	84.428	229.225	1.43898	6.04203e-23	4.27944e-22	up
LOC_Os09g23620	84.7753	31.3489	138.202	2.14391	6.17995e-23	4.37579e-22	up
LOC_Os02g47090	250.757	156.622	344.892	1.13442	6.40329e-23	4.52845e-22	up
LOC_Os01g67950	283.488	384.111	182.865	-1.07088	6.7242e-23	4.75251e-22	down
LOC_Os01g36610	213.152	125.278	301.027	1.26247	7.50058e-23	5.29484e-22	up
LOC_Os02g02650	205.521	288.691	122.35	-1.23781	7.70892e-23	5.43698e-22	down
novel.808	164.262	241.094	87.4297	-1.46563	8.35967e-23	5.8835e-22	down
LOC_Os11g44340	85.0946	32.0112	138.178	2.10086	9.2924e-23	6.52816e-22	up
LOC_Os07g44010	132.467	199.052	65.8829	-1.5957	9.6468e-23	6.77306e-22	down
LOC_Os04g38810	254.464	346.262	162.666	-1.08913	1.04545e-22	7.33131e-22	down
LOC_Os03g46180	306.309	201.366	411.253	1.02878	1.08514e-22	7.6051e-22	up
LOC_Os08g15060	162.033	236.338	87.7271	-1.43189	1.08866e-22	7.6275e-22	down
LOC_Os06g23980	187.107	108.748	265.466	1.28737	1.1784e-22	8.24879e-22	up
LOC_Os07g22580	248.319	340.277	156.361	-1.12298	1.3654e-22	9.53777e-22	down
LOC_Os12g05860	69.2733	21.2742	117.273	2.45593	1.60465e-22	1.11923e-21	up
LOC_Os03g15370	68.2918	20.5183	116.065	2.50613	1.62313e-22	1.13178e-21	up
LOC_Os10g42660	268.206	361.851	174.561	-1.05192	1.90933e-22	1.32936e-21	down
LOC_Os10g07290	279.552	376.824	182.279	-1.04544	2.21556e-22	1.53845e-21	down
LOC_Os08g36030	82.8051	31.8361	133.774	2.06785	2.23043e-22	1.54831e-21	up
LOC_Os01g54270	48.653	89.1728	8.13321	-3.45742	2.41142e-22	1.67196e-21	down
LOC_Os03g17960	289.438	390.581	188.295	-1.0534	2.43653e-22	1.68887e-21	down
LOC_Os11g02054	89.4525	145.362	33.5425	-2.12175	2.46132e-22	1.70555e-21	down
LOC_Os06g08610	103.557	161.869	45.2452	-1.83103	2.56456e-22	1.77603e-21	down
LOC_Os12g13640	267.068	172.09	362.045	1.06992	2.84002e-22	1.96447e-21	up
LOC_Os10g05410	195.469	115.428	275.51	1.25288	2.85148e-22	1.97181e-21	up
LOC_Os02g03020	267.688	365.951	169.425	-1.11443	3.09459e-22	2.1355e-21	down
LOC_Os12g32940	264.297	358.025	170.569	-1.07179	3.34522e-22	2.30572e-21	down
LOC_Os03g03490	289.734	191.889	387.578	1.01503	3.66018e-22	2.51984e-21	up
LOC_Os04g40620	124.041	58.7519	189.331	1.69795	3.79336e-22	2.60845e-21	up
LOC_Os03g08624	167.668	92.4173	242.919	1.39727	4.70537e-22	3.23178e-21	up
LOC_Os02g52040	197.677	276.666	118.687	-1.21945	5.63989e-22	3.86568e-21	down
LOC_Os01g62600	144.897	77.4607	212.333	1.4586	6.11652e-22	4.18868e-21	up
LOC_Os09g34320	340.476	225.35	455.603	1.0125	6.62014e-22	4.5309e-21	up
LOC_Os07g25540	220.83	136.213	305.447	1.16955	6.76146e-22	4.62627e-21	up
LOC_Os03g36279	52.8312	2.79643	102.866	5.23871	6.96545e-22	4.76445e-21	up
LOC_Os04g58730	173.605	250.105	97.1052	-1.36173	7.06602e-22	4.83041e-21	down
LOC_Os01g14550	147.064	79.1529	214.975	1.44178	7.43242e-22	5.07346e-21	up
LOC_Os08g37180	189.306	269.586	109.026	-1.30389	7.52727e-22	5.13671e-21	down
LOC_Os05g18604	134.322	199.444	69.2005	-1.53092	7.92376e-22	5.40412e-21	down
LOC_Os05g07080	130.803	65.5747	196.031	1.58929	8.80225e-22	5.99102e-21	up
LOC_Os01g66250	130.764	66.6682	194.861	1.54886	9.19394e-22	6.25215e-21	up
LOC_Os06g22440	282.416	377.138	187.693	-1.00697	1.01014e-21	6.85331e-21	down
LOC_Os09g15480	45.9028	6.69198	85.1136	3.64905	1.125e-21	7.63036e-21	up
LOC_Os01g55370	104.465	160.859	48.0708	-1.7403	1.28273e-21	8.68503e-21	down
LOC_Os02g37290	182.95	107.425	258.475	1.26434	1.3095e-21	8.86113e-21	up
LOC_Os08g35160	142.992	76.531	209.453	1.45491	1.31878e-21	8.91952e-21	up
LOC_Os06g39330	106.333	48.9281	163.738	1.73608	1.3459e-21	9.09954e-21	up
LOC_Os04g32820	56.2067	97.3316	15.0818	-2.7013	1.45532e-21	9.83363e-21	down
LOC_Os07g36544	263.795	170.111	357.479	1.07057	1.51374e-21	1.02195e-20	up
LOC_Os06g28670	146.734	216.998	76.4687	-1.50731	1.55342e-21	1.04843e-20	down
LOC_Os08g26520	57.2457	14.738	99.7535	2.77117	1.58454e-21	1.06882e-20	up
LOC_Os04g45480	71.7833	24.9011	118.665	2.24309	1.61146e-21	1.08666e-20	up
LOC_Os08g39370	146.118	78.9785	213.258	1.43165	1.6407e-21	1.10606e-20	up
LOC_Os01g65690	71.4104	119.804	23.0169	-2.37795	1.64917e-21	1.11113e-20	down
LOC_Os03g13200	131.032	250.397	11.6664	-4.42159	1.65808e-21	1.11649e-20	down
LOC_Os06g08120	73.1439	119.729	26.5592	-2.16868	1.67356e-21	1.12627e-20	down
LOC_Os01g71474	144.027	76.0183	212.036	1.48821	1.70219e-21	1.14488e-20	up
LOC_Os12g44010	68.2622	113.879	22.6452	-2.32389	1.7069e-21	1.14771e-20	down
LOC_Os01g74140	240.324	151.865	328.784	1.10999	1.81544e-21	1.21964e-20	up
LOC_Os05g27090	109.907	169.391	50.4238	-1.73948	1.89494e-21	1.27195e-20	down
LOC_Os12g07480	250.534	340.317	160.75	-1.08452	2.18013e-21	1.46044e-20	down
LOC_Os09g27950	115.846	55.0636	176.628	1.68314	2.18633e-21	1.46418e-20	up
LOC_Os07g14700	145.2	211.34	79.06	-1.41749	2.2033e-21	1.47469e-20	down
LOC_Os01g37630	45.0164	6.57298	83.4598	3.69039	2.60359e-21	1.73764e-20	up
LOC_Os04g34370	204.143	124.398	283.889	1.18882	2.72875e-21	1.81961e-20	up
LOC_Os10g04450	47.4447	85.7946	9.09475	-3.23469	2.88625e-21	1.92354e-20	down
LOC_Os06g50960	140.821	71.95	209.692	1.54022	2.90193e-21	1.93343e-20	up
LOC_Os08g02180	86.1601	35.151	137.169	1.95979	2.96886e-21	1.97521e-20	up
LOC_Os04g46130	93.2141	39.813	146.615	1.89133	2.99088e-21	1.98929e-20	up
LOC_Os06g46910	144.352	211.436	77.2693	-1.45541	3.00513e-21	1.99763e-20	down
LOC_Os04g04790	43.8998	84.21	3.58973	-4.55829	3.29625e-21	2.18866e-20	down
LOC_Os11g26780	215.58	0	431.161	11.1643	3.49693e-21	2.31862e-20	up
LOC_Os11g20160	278.229	182.264	374.194	1.04004	3.72435e-21	2.4659e-20	up
LOC_Os07g10590	47.6762	8.28335	87.069	3.41524	3.94276e-21	2.6083e-20	up
LOC_Os01g42110	65.451	129.302	1.59947	-6.31038	4.11801e-21	2.72346e-20	down
LOC_Os02g45380	129.033	192.34	65.7254	-1.55435	4.15408e-21	2.74654e-20	down
LOC_Os08g16070	268.697	359.652	177.741	-1.01535	4.34694e-21	2.87161e-20	down
LOC_Os05g31550	108.732	166.795	50.6683	-1.72334	4.6309e-21	3.05574e-20	down
LOC_Os05g49810	159.234	89.3224	229.146	1.357	6.1923e-21	4.07224e-20	up
LOC_Os02g08220	167.192	238.752	95.6323	-1.32065	6.7802e-21	4.45385e-20	down
LOC_Os09g33640	112.675	55.0382	170.313	1.63645	6.88064e-21	4.51855e-20	up
LOC_Os11g09040	153.26	222.613	83.9059	-1.40537	7.50697e-21	4.92294e-20	down
LOC_Os05g37450	111.395	53.5658	169.224	1.65862	7.88098e-21	5.16531e-20	up
LOC_Os12g21760	65.5351	110.027	21.0436	-2.37849	8.00479e-21	5.24499e-20	down
LOC_Os07g04820	52.1596	12.0979	92.2213	2.92066	8.21636e-21	5.37904e-20	up
LOC_Os02g47810	124.766	63.3165	186.215	1.5522	8.24992e-21	5.39804e-20	up
LOC_Os03g13450	67.2618	22.6848	111.839	2.3001	9.37363e-21	6.12472e-20	up
LOC_Os06g15370	209.14	129.81	288.471	1.15272	1.02385e-20	6.68605e-20	up
LOC_Os04g32480	45.7894	8.56438	83.0143	3.28707	1.12722e-20	7.35289e-20	up
LOC_Os04g58200	50.967	2.33471	99.5994	5.38959	1.1665e-20	7.6006e-20	up
LOC_Os05g48650	281.366	186.651	376.082	1.01541	1.24262e-20	8.08085e-20	up
LOC_Os06g01460	240.86	153.885	327.835	1.09562	1.25843e-20	8.17911e-20	up
LOC_Os04g12720	42.8	5.05015	80.5498	3.98512	1.28807e-20	8.36241e-20	up
LOC_Os10g07400	314.106	202.911	425.302	1.07189	1.37717e-20	8.93093e-20	up
LOC_Os09g32964	79.8719	128.019	31.7244	-2.01075	1.38732e-20	8.9943e-20	down
LOC_Os01g51360	170.218	245.128	95.309	-1.36361	1.48218e-20	9.59596e-20	down
LOC_Os06g35960	224.19	141.027	307.352	1.12461	1.56483e-20	1.0117e-19	up
LOC_Os04g50100	160.016	228.384	91.6489	-1.31775	1.60081e-20	1.03468e-19	down
LOC_Os01g28600	182.607	106.508	258.707	1.27832	1.77641e-20	1.14628e-19	up
LOC_Os08g43350	193.186	268.876	117.495	-1.19189	1.84047e-20	1.18695e-19	down
LOC_Os01g58270	102.703	43.4281	161.979	1.89501	1.95332e-20	1.25765e-19	up
LOC_Os07g44450	47.9032	85.0082	10.7982	-2.98288	2.17177e-20	1.39561e-19	down
LOC_Os02g52540	56.1701	16.3362	96.004	2.55717	2.27522e-20	1.46048e-19	up
LOC_Os09g20170	113.196	1.03619	225.356	7.78902	2.45151e-20	1.57234e-19	up
LOC_Os06g34730	157.152	225.044	89.2594	-1.33331	2.63874e-20	1.6915e-19	down
LOC_Os08g03270	59.6779	101.113	18.2432	-2.4692	2.78012e-20	1.78066e-19	down
LOC_Os02g36810	234.001	318.167	149.835	-1.08992	2.78631e-20	1.78414e-19	down
LOC_Os10g31440	49.5178	11.2112	87.8243	2.97168	2.90682e-20	1.85977e-19	up
LOC_Os08g35590	53.6302	92.4242	14.8363	-2.62938	3.2517e-20	2.07645e-19	down
LOC_Os05g16430	155.537	225.73	85.3435	-1.40858	3.26117e-20	2.08192e-19	down
LOC_Os08g04560	49.8548	11.5671	88.1425	2.93024	3.53785e-20	2.25794e-19	up
LOC_Os06g10750	150.671	218.431	82.9108	-1.3978	3.74482e-20	2.38808e-19	down
LOC_Os02g53360	109.641	165.111	54.1712	-1.60619	4.43308e-20	2.81392e-19	down
LOC_Os08g43815	196.952	275.463	118.441	-1.21556	4.50093e-20	2.85466e-19	down
LOC_Os04g39600	66.056	108.393	23.7192	-2.19234	5.53649e-20	3.50194e-19	down
LOC_Os09g37650	41.4706	76.1447	6.79647	-3.48136	6.05454e-20	3.82445e-19	down
LOC_Os09g25960	247.679	333.427	161.931	-1.04167	6.34301e-20	4.00233e-19	down
LOC_Os09g11170	74.445	28.4029	120.487	2.07981	6.89747e-20	4.34749e-19	up
LOC_Os04g02860	43.6858	78.5474	8.82422	-3.15894	7.27673e-20	4.57912e-19	down
LOC_Os09g11440	150.112	216.474	83.7494	-1.37049	7.62178e-20	4.79239e-19	down
novel.706	58.7896	18.4522	99.127	2.43093	7.68853e-20	4.83305e-19	up
LOC_Os01g56020	243.753	327.006	160.501	-1.02746	8.52216e-20	5.34701e-19	down
LOC_Os03g12790	214.299	294.313	134.286	-1.12994	8.70659e-20	5.45979e-19	down
LOC_Os04g21890	181.104	256.172	106.036	-1.27092	8.76785e-20	5.49673e-19	down
LOC_Os12g29430	96.482	44.5266	148.437	1.73637	1.04604e-19	6.53854e-19	up
LOC_Os02g16780	69.4818	24.8632	114.1	2.19881	1.05616e-19	6.59999e-19	up
LOC_Os07g46510	74.1312	119.554	28.7082	-2.05115	1.06729e-19	6.66777e-19	down
LOC_Os10g11140	105.971	50.1631	161.779	1.69531	1.15921e-19	7.23818e-19	up
LOC_Os01g74146	234.259	318.376	150.142	-1.0827	1.17116e-19	7.31086e-19	down
LOC_Os01g15620	113.366	169.486	57.2461	-1.56574	1.17621e-19	7.33841e-19	down
LOC_Os02g15750	97.6373	45.3074	149.967	1.72374	1.22979e-19	7.67067e-19	up
LOC_Os03g50710	54.0566	15.6184	92.4949	2.56525	1.48737e-19	9.24032e-19	up
LOC_Os04g02980	47.0641	82.9364	11.1918	-2.90457	1.52522e-19	9.46786e-19	down
LOC_Os09g37330	164.786	233.681	95.8912	-1.28564	1.58601e-19	9.8374e-19	down
LOC_Os11g44250	136.889	199.398	74.379	-1.42312	1.67577e-19	1.03859e-18	down
LOC_Os05g50500	74.1428	118.593	29.6928	-2.00215	1.68887e-19	1.04643e-18	down
LOC_Os01g50460	171.9	99.1242	244.675	1.2952	1.77423e-19	1.09844e-18	up
[truncated: 1,450 more rows]
